# Supplementary material for: Conserved exchange of paralog proteins during neuronal differentiation
Source: bioRxiv preprint, doi:10.1101/2021.07.22.453347, version 1 (2021-07-23)
Supplement: Table S1 [file 453347_file02.xlsx]

## Sheet: Summary
Embryo Development
The transcriptome data from White et al. 2017,
Values represent the TPM for each genes (rows) and for specific embryo time-points (columns)
	column names
	hasParalogs	indicates if the specific gene has paralogs in the zebrafish genome
	coef.var	the coefficient of variation (sd/mean) of the specific gene
Tissues - Transcriptome
The transcriptome data from Wang et al., 2019 from 29 healthy human tissues
Values represent log2(FPKM) for each gene(rows) and specific tissues (columns)
	column names
	hasParalogs	indicates if the specific gene has paralogs in the zebrafish genome
	coef.var	the coefficient of variation (sd/mean) of the specific gene
Tissues - Proteome
The proteome data from Wang et al., 2019 from 29 healthy human tissues
Values represent log2(iBAQ) for each gene(rows) and specific tissues (columns)
	column names
	hasParalogs	indicates if the specific gene has paralogs in the zebrafish genome
	coef.var	the coefficient of variation (sd/mean) of the specific gene
Paralog pairs (Embryo)
The correlation values for paralog pairs in the zebrafish development data (White et al., 2017)
	column names
	IDs	unique identifier for the paralog pair
	corr	the R pearson correlation value for each pairs
	mean.identity	the reciprocal mean identity between the two paralogs
	p.1	ENSEMBL gene paralog 1
	p.2	ENSEMBL gene paralog 2
	type	Specificy if paralog pairs are part of the same protein complex
	complex	If a pair belongs to a specific complex, it contains the name of that complex
Paralog pairs (Transcr.)
The correlation values for paralog pairs in the transcriptome tissue atlas (Wang et al., 2019)
	column names
	IDs	unique identifier for the paralog pair
	corr	the R pearson correlation value for each pairs
	mean.identity	the reciprocal mean identity between the two paralogs
	p.1	SYMBOL gene paralog 1
	p.2	SYMBOL gene paralog 2
	type	Specificy if paralog pairs are part of the same protein complex
	complex	If a pair belongs to a specific complex, it contains the name of that complex
Paralog pairs (Prot.)
The correlation values for paralog pairs in the proteome tissue atlas (Wang et al., 2019)
	column names
	IDs	unique identifier for the paralog pair
	corr	the R pearson correlation value for each pairs
	mean.identity	the reciprocal mean identity between the two paralogs
	p.1	SYMBOL gene paralog 1
	p.2	SYMBOL gene paralog 2
	type	Specificy if paralog pairs are part of the same protein complex
	complex	If a pair belongs to a specific complex, it contains the name of that complex

## Sheet: Embryo Development
zygote	cleavage.2.cell	blastula.128.cell	blastula.1k.cell	blastula.dome	gastrula.50..epiboly	gastrula.shield	gastrula.75..epiboly	segmentation.1.4.somites	segmentation.14.19.somites	segmentation.20.25.somites	pharyngula.prim.5	pharyngula.prim.15	pharyngula.prim.25	hatching.long.pec	larval.protruding.mouth	larval.day.4	larval.day.5	ids	hasParalogs	coeff.var	SYMBOL
2	5	15	16	7	3	2	3	3	2	2	2	3	2	3	3	5	4	ENSDARG00000000001	TRUE	0.922818	SLC35A5
0.3	4	3	1	0.7	0.4	0.3		0.4	3	7	9	11	9	12	19	18	18	ENSDARG00000000002	TRUE	0.987759	CCDC80
7	14	83	140	110	61	36	39	60	60	48	44	39	59	42	26	21	24	ENSDARG00000000018	FALSE	0.658438	NRF1
144	162	176	181	176	120	96	102	59	37	65	81	62	57	70	100	106	97	ENSDARG00000000019	TRUE	0.43392	UBE2H
42	43	92	79	70	80	68	48	18	24	21	19	11	10	9	28	46	36	ENSDARG00000000068	TRUE	0.642624	SLC9A3R1A
265	237	124	113	102	78	63	56	70	69	86	90	89	71	67	72	101	75	ENSDARG00000000069	TRUE	0.56569	DAP
2	3	18	20	15	9	5	7	13	9	12	11	11	13	12	13	15	15	ENSDARG00000000086	TRUE	0.427746	ITSN1
22	14	41	49	39	36	25	30	60	59	70	75	65	68	52	38	40	35	ENSDARG00000000103	TRUE	0.390674	MYH10
2	5	21	20	12	8	4	6	5	2	4	3	4	7	7	9	9	6	ENSDARG00000000142	FALSE	0.727364	TMEM267
4	5	26	30	9	1	0.8	2	1	1	2	2	3	3	3	5	5	5	ENSDARG00000000151	TRUE	1.38525	THRAA
	0.1	0.6	0.6	0.8	0.3		0.2	0.6	0.6	0.7	0.8	0.6	1	3	6	6	5	ENSDARG00000000161	TRUE	1.24277	ITSN2A
		11	4	2	0.5			20	33	31	26	27	30	23	13	9	8	ENSDARG00000000175	TRUE	0.676115	HOXB2A
27	36	50	59	21	3	1	2	6	8	9	6	6	6	6	10	10	10	ENSDARG00000000183	TRUE	1.10202	PTPN4B
8	13	15	19	3	0.5	0.4	0.5	3	3	3	6	6	7	11	17	19	19	ENSDARG00000000189	TRUE	0.805627	SEMA6E
	0.6	2		49	521	954	915	403	251	162	160	198	121	150	129	385	457	ENSDARG00000000212	TRUE	0.959825	KRT97
0.2	0.6	7	7	9	8	9	15	14	17	17	16	17	19	18	14	11	10	ENSDARG00000000229	TRUE	0.489592	USP49
0.3	0.3	0.5	0.5	0.7	0.6	1	1	5	10	27	50	54	44	45	41	60	55	ENSDARG00000000241	TRUE	1.09346	SLC40A1
28	35	51	48	22	9	9	10	13	12	12	10	13	19	18	20	24	25	ENSDARG00000000324	TRUE	0.603887	DCAF8
								1	2	2	3	3	0.8	2	1		0.8	ENSDARG00000000349	FALSE	0.509525	CFAP300
								1	4	8	11	11	13	7	11	11	11	ENSDARG00000000369	TRUE	0.43122	PRKAG3B
0.1		0.4	0.5	0.1			0.7	7	5	6	6	6	8	7	10	13	13	ENSDARG00000000370	TRUE	0.80562	TRIOB
				0.6	0.5	0.4	1	1	0.3		0.1	0.5	0.3	0.6	9	14	13	ENSDARG00000000380	TRUE	1.6213	PDE6A
81	99	165	134	141	189	248	209	168	115	101	88	76	75	63	50	44	41	ENSDARG00000000394	TRUE	0.517637	MATR3L1.2
4	6	33	51	22	7	3	6	9	8	8	7	5	6	6	7	6	5	ENSDARG00000000423	TRUE	1.11537	SI:CH73-314G15.3
16	23	94	120	67	37	24	23	27	22	26	22	20	16	17	18	14	10	ENSDARG00000000442	TRUE	0.902711	SLC39A13
3	5	6	6	6	3	3	2	1	3	5	6	8	13	19	10	11	12	ENSDARG00000000472	TRUE	0.685626	CNTN2
7	12	37	30	26	16	8	6	8	7	7	6	6	4	3	3	4	5	ENSDARG00000000476	TRUE	0.920494	PMS1
41	37	54	57	63	49	42	38	51	56	44	45	34	36	26	21	23	28	ENSDARG00000000489	TRUE	0.295231	UPF3B
									3	12	20	32	47	77	163	151	138	ENSDARG00000000503	TRUE	0.887868	STX1B
								0.2	0.1	0.2	0.1	0.1	0.3			0.2		ENSDARG00000000516	TRUE	0.440959	ANKAR
65	73	54	65	59	19	7	9	18	15	15	13	10	9	7	5	6	6	ENSDARG00000000529	FALSE	0.980157	OFD1
46	37	49	54	77	41	38	30	34	32	28	18	15	14	11	13	9	8	ENSDARG00000000540	TRUE	0.602675	ASNSD1;ASDURF
24	28	81	68	59	35	33	35	30	27	22	18	16	15	12	8	6	7	ENSDARG00000000542	FALSE	0.722565	GTF2E1
1	1	2	2	0.7	0.9	0.6	1	6	8	19	34	33	17	30	26	14	12	ENSDARG00000000551	TRUE	1.05167	SLC1A4
	0.1	0.1	0.1	0.1	0.1	0.1	0.2	1	2	5	12	17	21	16	18	24	27	ENSDARG00000000563	TRUE	1.17208	TTN.1
1	4	3	3	18	44	44	39	31	30	31	27	29	44	31	12	11	9	ENSDARG00000000567	TRUE	0.672004	ZNF281A
147	152	235	258	87	15	14	18	19	15	14	19	19	19	16	19	18	20	ENSDARG00000000568	TRUE	1.31337	ELL
7	10	43	54	19	9	5	8	14	18	16	10	4	3	7	7	6	8	ENSDARG00000000588	TRUE	0.984392	TAMALIN
								0.2	0.3	0.7	0.8	0.9	0.7	0.7	0.6	0.7	0.6	ENSDARG00000000606	TRUE	0.346764	DNAH6
5	12	60	71	17	6	6	12	13	14	21	18	13	14	13	14	15	14	ENSDARG00000000631	TRUE	0.935781	PTPN4A
				1	3	6	3	8	8	5	8	5	4	4	3	5	4	ENSDARG00000000651	TRUE	0.442719	OSGEPL1
	0.6							0.7	1	1	0.9		0.6					ENSDARG00000000656	TRUE	0.237171	PSMB9A
	0.4	1	3	1	0.9	2	2	15	14	18	13	10	11	11	21	30	31	ENSDARG00000000666	TRUE	0.916609	CREG2
9	6	4	3	4	9	7	11	23	13	18	25	24	20	18	16	12	8	ENSDARG00000000690	TRUE	0.563424	SYPL2B
171	214	200	198	206	86	95	80	46	43	33	38	30	31	20	12	12	11	ENSDARG00000000729	FALSE	0.901483	DAXX
64	46	45	64	26	5	4	5	5	6	5	5	5	6	5	11	16	10	ENSDARG00000000730	TRUE	1.14204	SLC6A22.1
12	21	32	28	11	6	5	8	11	10	7	4	3	3	2	2	2	3	ENSDARG00000000747	TRUE	0.946499	LCMT2
21	13	33	46	21	6	8	12	14	13	11	10	7	7	7	8	10	10	ENSDARG00000000760	FALSE	0.726201	ZNF511
								2	5	4	3	3	2	2	2	4	4	ENSDARG00000000767	TRUE	0.355002	SPI1B
21	19	87	78	55	40	30	29	52	44	55	53	46	45	41	43	42	33	ENSDARG00000000779	TRUE	0.383423	SCFD1
15	21	23	7	15	2	0.4	0.3	2	1	3	5	11	20	26	47	34	33	ENSDARG00000000796	TRUE	0.935429	NR4A1
1	0.5		0.6				1	8	12	15	21	18	13	16	18	16	15	ENSDARG00000000804	TRUE	0.668164	RASSF6
3	17	27	22	14	10	15	17	19	19	17	14	10	13	9	7	7	7	ENSDARG00000000830	FALSE	0.445602	TELO2
9	12	28	37	22	12	5	0.5	1	2	4	4	6	4	5	10	13	13	ENSDARG00000000837	TRUE	0.940064	SNX9A
336	334	242	188	221	127	83	55	46	44	44	37	46	46	38	33	33	38	ENSDARG00000000853	TRUE	0.954946	DSTYK
58	85	167	170	140	90	86	101	89	71	64	47	40	38	31	30	25	22	ENSDARG00000000857	TRUE	0.612652	MAPK14A
81	91	88	89	74	75	58	66	57	48	63	60	47	49	33	29	29	27	ENSDARG00000000861	TRUE	0.35924	SCRIB
1414	1466	923	999	1087	978	765	359	83	55	50	62	36	15	14	7	6	4	ENSDARG00000000887	TRUE	1.17525	ZGC:56699
5	2	15	18	7	4	4	2	6	6	2	3	5	4	4	5	9	9	ENSDARG00000000906	TRUE	0.709708	SKAP2
4	6	14	16	10	3	1	2	4	4	5	4	4	5	4	3	3	3	ENSDARG00000000935	TRUE	0.760136	UNK
	0.2	0.2		2	19	28	23	24	18	17	14	13	14	10	9	7	8	ENSDARG00000000943	TRUE	0.651507	DZIP1
16	18	55	53	23	3	2	6	17	19	21	21	20	29	25	30	30	31	ENSDARG00000000966	TRUE	0.607325	NCOR2
16	23	35	26	23	25	21	19	18	21	44	87	84	59	56	52	55	40	ENSDARG00000001014	TRUE	0.567664	MYH9B
0.3	2	3	3	3	3	3	5	6	7	7	6	8	10	12	11	12	13	ENSDARG00000001015	TRUE	0.616207	ZNF384A
2	6	46	44	68	127	169	228	266	262	252	174	109	108	73	66	73	101	ENSDARG00000001057	FALSE	0.709291	BYSL
		1	0.5	0.3	0.3					0.3	1	3	5	7	17	18	18	ENSDARG00000001127	TRUE	1.23887	SLC17A6A
9	10	41	50	22	7	5	12	27	23	25	20	17	21	16	16	18	17	ENSDARG00000001129	FALSE	0.570081	DICER1
				0.2				0.3		0.4	0.3	0.1	0.9	1	4	5	9	ENSDARG00000001154	TRUE	1.39978	RIMBP2
8	16	90	91	88	93	104	88	44	33	36	31	27	33	28	21	21	21	ENSDARG00000001162	FALSE	0.68055	MATR3L1.1
5	7	12	14	10	4	2	0.5	0.4	0.8	0.5	0.6	2	2	3	6	5	5	ENSDARG00000001169	TRUE	0.923371	HSD17B8
584	485	161	151	62	99	143	146	132	146	121	102	87	96	64	45	38	30	ENSDARG00000001210	TRUE	0.982232	ARL14EP
6	6	13	15	13	10	7	4	14	12	13	16	15	17	17	22	24	22	ENSDARG00000001220	FALSE	0.416193	MYCBP2
		8		1				0.6	2	4	3	3	3	5	7	10	9	ENSDARG00000001234	TRUE	0.68172	MAP4K2
101	152	240	245	247	267	297	276	230	192	188	153	120	135	92	69	63	51	ENSDARG00000001241	TRUE	0.461076	PUF60B
141	173	220	182	236	303	366	382	258	184	164	122	93	107	77	75	73	84	ENSDARG00000001244	FALSE	0.541918	SRRM1
69	78	77	80	26	9	10	12	19	16	13	12	9	14	10	6	6	5	ENSDARG00000001249	TRUE	1.06711	PCGF1
	2	3	4	3	1		0.8	4	1	6	1	1	2	4	5	4	3	ENSDARG00000001259	TRUE	0.57735	GAS2
				0.9	0.6	0.6												ENSDARG00000001303	TRUE	0.247436	PSMB8A
29	35	130	123	39	64	91	72	50	47	47	38	35	37	27	10	8	6	ENSDARG00000001313	TRUE	0.71673	G2E3
							0.4	1	2	2	3	3	1	4	7	9	9	ENSDARG00000001354	TRUE	0.837464	SLC6A22.2
		0.4		0.7	12	23	34	15	5	5	5	4	2	4	4	5	4	ENSDARG00000001414	TRUE	1.13395	MCTP2A
0.5	0.8	2	3	2	3	3	3	4	16	49	140	267	319	331	325	331	321	ENSDARG00000001431	TRUE	1.25816	ACTN3B
									2	19	38	14	5	7	11	25	31	ENSDARG00000001437	TRUE	0.730863	SLC2A1A
17	13	15	13	13	3	1	0.6	0.5	0.2	0.6	1	2	2	2	3	5	4	ENSDARG00000001442	TRUE	1.10018	INPPL1B
14	23	43	37	12	7	7	7	17	17	16	12	14	14	10	8	7	7	ENSDARG00000001447	TRUE	0.672533	MIER1B
37	43	44	23	10	3	4	7	21	14	11	7	5	7	5	3	4	2	ENSDARG00000001452	TRUE	1.00615	ADAM8A
								0.5	0.4	0.2	1	5	14	26	40	36	42	ENSDARG00000001463	TRUE	1.07455	TDH2
9	15	20	18	17	7	3	3	22	20	20	18	13	18	13	9	13	9	ENSDARG00000001470	TRUE	0.432076	MHC1ZEA
	0.3		0.3	0.3			1	3	1	2	2	1	2	0.5	0.4	0.6	0.9	ENSDARG00000001498	TRUE	0.766802	SKAP1
9	23	58	55	54	32	22	17	11	7	9	8	7	8	5	5	4	3	ENSDARG00000001549	TRUE	0.995521	SP3A
22	32	44	36	39	21	21	34	37	26	28	31	21	24	17	14	11	8	ENSDARG00000001557	TRUE	0.387602	TOMM34
211	260	359	287	234	230	307	255	179	147	136	135	111	120	74	35	33	20	ENSDARG00000001558	TRUE	0.57498	KIFC1
		0.1	0.1	0.1							0.3	0.3	0.2	0.9	2	4	4	ENSDARG00000001559	TRUE	1.32229	CSMD2
4	11	68	73	90	108	86	78	45	25	36	62	83	84	84	106	115	91	ENSDARG00000001578	TRUE	0.471547	ECHS1
14	26	31	38	41	14	5	2	4	4	5	5	7	6	7	6	6	5	ENSDARG00000001621	TRUE	0.995986	NFYAL
0.2	0.1	0.6	1	0.4	0.4	0.1	0.8	17	19	19	15	14	17	16	17	17	14	ENSDARG00000001634	TRUE	0.887267	KIRREL1A
				0.6														ENSDARG00000001656	TRUE		PSMB13A
5	9	13	16	16	11	10	4	4	8	19	27	46	57	36	41	46	40	ENSDARG00000001676	TRUE	0.756914	GPM6BB
				0.4				0.5	0.8	1	2	0.9	1	0.8	4	6	6	ENSDARG00000001686	TRUE	1.0161	UCKL1A
30	36	22	23	18	10	9	8	15	16	22	26	35	44	58	57	55	55	ENSDARG00000001710	TRUE	0.578588	FLOT1A
										1	3	3	1	2	1	2	3	ENSDARG00000001712	TRUE	0.46291	SI:CH211-247N2.1
	0.6	0.6	0.6	0.8	0.4	0.3	0.7	23	54	76	61	25	11	4	0.5	0.3	0.3	ENSDARG00000001721	TRUE	1.62032	OC90
55	55	69	73	55	69	75	82	79	64	77	65	50	54	49	48	44	36	ENSDARG00000001729	TRUE	0.218262	STRN3
28	47	65	74	33	7	2	2	12	12	14	17	16	15	18	28	22	19	ENSDARG00000001733	TRUE	0.830768	GULP1A
37	36	85	82	39	16	18	17	10	11	12	13	15	14	14	23	26	24	ENSDARG00000001734	TRUE	0.817496	FKBP8
10	23	95	89	88	95	88	88	140	115	97	64	34	34	22	23	23	29	ENSDARG00000001754	FALSE	0.614096	NOC2L
														0.8	18	15	11	ENSDARG00000001760	TRUE	0.669901	TNXBA
102	110	18	19	3	4	6	6	8	8	9	15	11	9	9	7	7	5	ENSDARG00000001767	TRUE	1.6029	SLC29A2
38	60	69	58	53	39	23	22	18	10	16	16	19	17	16	16	18	18	ENSDARG00000001769	TRUE	0.636815	PTPRA
															0.5	0.8	2	ENSDARG00000001771	TRUE	0.721569	OTOL1A
0.8	2	3	3	2	0.6	0.2	1	4	2	2	2	1	2	2	3	2	2	ENSDARG00000001776	TRUE	0.497248	STIM2B
77	75	89	78	84	78	72	51	61	54	56	60	49	44	25	18	19	19	ENSDARG00000001777	FALSE	0.417363	NUP155
	2	2	0.9	2	2			7	6	8	7	7	6	4	7	10	9	ENSDARG00000001781	TRUE	0.55011	TSPAN11
						1	10	5	3	6	12	10	3	5	5	4	2	ENSDARG00000001782	TRUE	0.627446	PRKACBA
		0.7	0.5			0.2		0.5	1	4	6	9	15	21	14	15	14	ENSDARG00000001785	TRUE	0.937154	IRX2A
379	228	48	50	33	33	28	58	146	197	216	268	297	322	353	450	408	313	ENSDARG00000001788	FALSE	0.679805	ATP5PO
0.9	0.2			0.1				2	3	3	2	2	1	0.9	2	2	3	ENSDARG00000001803	TRUE	0.590681	KCNH6A
29	27	23	14	9	7	4	2	6	5	5	4	6	2	4	6	12	10	ENSDARG00000001804	TRUE	0.857526	ZGC:112148
				3	2	0.8	0.4	4	3	4	3	4	6	7	14	14	13	ENSDARG00000001807	TRUE	0.844105	TNFRSF21
6	18	32	30	22	8	3	2	4	4	3	3	1		1	4	2	3	ENSDARG00000001817	TRUE	1.19034	ZMP:0000000521
		0.2	0.1		0.2			0.8	1	1	2	1	0.9	1	4	7	9	ENSDARG00000001818	TRUE	1.29275	C3B.2
		0.1	0.2					0.8	1	1	1	0.8	0.9	0.5	0.4	0.3	0.2	ENSDARG00000001825	FALSE	0.586033	CFAP43
13	11	82	79	72	75	83	76	75	56	54	41	39	47	39	38	45	49	ENSDARG00000001829	TRUE	0.413328	ZGC:112982
0.2	0.5	0.3	0.3	0.2	0.1	0.3	0.2	0.3	0.5	0.6	1	2	2	4	6	7	7	ENSDARG00000001835	TRUE	1.35444	NALCN
20	30	79	75	35	21	15	19	11	6	10	11	13	11	11	12	15	15	ENSDARG00000001857	TRUE	0.924859	AFF4
				1	0.8	1	1	15	28	45	46	41	36	20	5	5	4	ENSDARG00000001859	TRUE	1.00842	DBX1B
	0.5	1	2	1	0.5	0.3	0.4	0.1	3	22	49	45	17	31	84	187	265	ENSDARG00000001870	TRUE	1.78752	ATP1A1A.4
1	5	104	114	99	90	72	46	86	93	125	115	108	100	65	42	28	21	ENSDARG00000001873	TRUE	0.544814	PHGDH
0.3	0.3	2	2	20	23	12	11	20	16	17	14	11	9	7	7	9	9	ENSDARG00000001879	TRUE	0.654533	NAV2B
14	34	27	32	10	3	3	4	10	6	9	9	9	9	7	17	19	17	ENSDARG00000001880	TRUE	0.710653	STX3A
															1	2	2	ENSDARG00000001881	TRUE	0.34641	CACNB3A
											1	4	8	11	18	23	25	ENSDARG00000001882	TRUE	0.726058	KBTBD12
3	9	34	40	33	38	36	37	24	15	15	12	12	17	10	13	12	12	ENSDARG00000001888	TRUE	0.588654	PPM1BA
				2	11	52	133	255	327	376	407	445	489	551	343	222	165	ENSDARG00000001889	TRUE	0.661998	TUBA1A
65	105	203	188	172	93	53	39	93	83	102	99	76	70	60	64	54	41	ENSDARG00000001890	TRUE	0.525909	STT3B
0.3		0.7	1	0.3							0.1	0.5	0.8	2	2	5	4	ENSDARG00000001891	TRUE	1.0665	SYT14B
20	27	60	52	42	26	15	13	16	15	19	35	25	14	17	13	22	24	ENSDARG00000001897	TRUE	0.540352	MAN2B1
22	23	18	10	5	1	0.9	3	5	4	4	5	4	5	5	9	8	5	ENSDARG00000001898	TRUE	0.873096	MANEA
												0.5		0.3	0.8	0.9	0.7	ENSDARG00000001906	TRUE	0.3763	SI:DKEY-247M21.3
											2	4	2	4	5	7	7	ENSDARG00000001909	TRUE	0.467464	VILL
	0.4	1	1	0.4	0.2	0.4	0.8	3	6	8	8	7	6	16	39	39	48	ENSDARG00000001910	TRUE	1.43484	RORAB
0.5	0.7	1	2	1	0.3						0.7	0.9	0.6	1	3	2	3	ENSDARG00000001912	TRUE	0.711929	DRD4-RS
								1	4	6	6	5	5	5	7	6	5	ENSDARG00000001913	TRUE	0.326599	PALMDA
5	7	30	26	7	3	3	3	5	2	4	3	2	2	2	4	8	7	ENSDARG00000001929	TRUE	1.16669	PINK1
16	16	48	46	14	6	6	9	9	7	7	6	6	10	10	11	11	11	ENSDARG00000001930	TRUE	0.902636	KLHL15
											2	4	3	3	4	4	6	ENSDARG00000001933	TRUE	0.337499	PRKAG2B
									0.2	2	5	5	5	4	3	4	3	ENSDARG00000001937	TRUE	0.466024	LOC100334818
2	6	26	27	26	22	21	21	23	18	16	12	11	13	10	9	8	6	ENSDARG00000001939	TRUE	0.510278	B3GAT3
163	352	485	515	511	215	119	97	93	75	70	51	38	35	36	32	37	31	ENSDARG00000001940	TRUE	1.0713	DNAJC1
					1	1	1	6	20	71	304	725	982	1392	1551	1337	1357	ENSDARG00000001950	TRUE	1.07678	AK1
		0.8	1	3	5	2	2	4	5	5	3	2	4	7	13	14	21	ENSDARG00000001953	TRUE	0.972436	PFKFB3
1	1	9	9	6	5	3	1	0.7	0.9	1	1	1	1	1	2	4	3	ENSDARG00000001968	TRUE	0.976339	DOCK5
64	73	72	75	31	21	20	22	29	24	24	18	14	14	10	9	9	9	ENSDARG00000001969	TRUE	0.790569	TXLNG
															10	20	13	ENSDARG00000001971	TRUE	0.358019	CTHRC1B
0.4							0.8	2	0.5	1	1	5	11	17	36	38	29	ENSDARG00000001975	TRUE	1.23775	HSD11B2
		1	3	2	1	3	2	11	20	19	24	15	10	9	22	19	19	ENSDARG00000001976	TRUE	0.751799	FKBP16
				1	2	1	0.9	2	0.6	0.4	0.2	0.2	0.7	2	87	82	55	ENSDARG00000001993	TRUE	1.91191	MYHB
			0.1					1	11	23	37	57	89	123	227	210	204	ENSDARG00000001994	TRUE	0.988441	STXBP1A
				1	16	27	30	16	9	7	5	4	4	6	6	5	5	ENSDARG00000001999	TRUE	0.884202	ADAMTS18
0.5	1	9	19	13	4	1	0.6	3	4	2	1	2	3	5	8	8	7	ENSDARG00000002002	TRUE	0.974518	LMCD1
4	8	22	22	6	7	8	10	10	10	10	8	9	11	10	11	14	15	ENSDARG00000002006	TRUE	0.44354	RXRBB
5	10	13	18	5	4	4	9	15	9	9	7	7	6	6	6	9	10	ENSDARG00000002013	TRUE	0.450883	GRB10A
27	137	233	203	170	77	64	57	65	52	50	45	34	34	27	23	22	19	ENSDARG00000002016	TRUE	0.883509	PPIL2
2	4	11	13	5	2	3	6	6	4	5	4	4	5	5	5	6	6	ENSDARG00000002020	TRUE	0.514496	RICTORB
6	9	25	24	20	18	18	9	7	7	14	17	21	21	21	29	50	45	ENSDARG00000002021	TRUE	0.602108	PYGB
								0.6	0.6	2	3	3	6	7	6	8	6	ENSDARG00000002026	TRUE	0.639937	QKIB
36	43	130	109	87	82	86	79	64	54	52	40	33	37	30	19	17	14	ENSDARG00000002031	TRUE	0.586419	TOX4A
0.4	3	10	9	3	0.8					0.5	2	2	2	2	8	8	8	ENSDARG00000002037	TRUE	0.841746	PFKFB2B
63	46	48	47	14	7	6	8	6	7	7	3	4	5	3	2	1	0.8	ENSDARG00000002060	TRUE	1.30106	BRF2
0.7	0.6	0.5	1	0.8	1	2	0.4	0.9	0.9	7	17	25	24	26	36	38	25	ENSDARG00000002071	TRUE	1.19673	ADSS2
33	58	74	77	43	24	18	17	19	19	19	15	12	12	13	11	11	7	ENSDARG00000002077	FALSE	0.812395	MNAT1
182	196	268	255	200	281	329	310	227	185	196	174	140	140	121	114	90	75	ENSDARG00000002082	TRUE	0.381702	CSNK2A1
		0.2			0.1	0.1		2	4	13	34	43	40	34	36	31	24	ENSDARG00000002084	TRUE	0.852598	LAMB2
											0.4					0.6	0.7	ENSDARG00000002097	TRUE	0.269563	NA
217	207	156	158	64	21	20	34	28	31	36	35	34	42	39	34	31	27	ENSDARG00000002127	TRUE	0.984869	STAM
120	127	131	113	127	103	76	61	69	55	54	37	29	29	22	15	15	11	ENSDARG00000002128	TRUE	0.65712	CWF19L1
0.7	1	3	4	2	0.6	0.3		2	5	13	20	30	38	36	37	37	41	ENSDARG00000002131	TRUE	1.03951	CELF2
17	18	13	38	10	24	6	7	14	2	2	2		0.8	1	6	15	11	ENSDARG00000002165	TRUE	0.888781	PSME1
7	12	14	9	9	5	2	2	4	3	6	7	10	12	11	13	15	12	ENSDARG00000002167	TRUE	0.491325	CACNB1
145	146	126	130	153	181	174	136	90	98	96	72	66	67	52	41	38	41	ENSDARG00000002168	TRUE	0.459319	TRA2B
				101	155	164	120	59	42	31	31	24	22	16	17	18	18	ENSDARG00000002172	TRUE	0.914887	APLNRA
3	3	17	23	11	3	3	5	8	9	12	12	12	9	11	10	10	9	ENSDARG00000002174	FALSE	0.547444	ITFG2
10	30	126	164	121	47	33	35	49	45	41	27	28	38	26	24	21	18	ENSDARG00000002184	FALSE	0.86629	IGBP1
244	242	165	182	190	182	123	86	54	48	60	69	66	57	61	79	73	61	ENSDARG00000002190	TRUE	0.599925	CHMP2BB
											0.5	1	3	6	21	26	19	ENSDARG00000002192	TRUE	0.979993	ASPN
										0.4	0.6	1	0.6	6	1488	1952	1902	ENSDARG00000002193	TRUE	1.39155	RHO
					0.2	0.2	0.5	0.4	0.4	0.6	1	3	3	3	2	1	1	ENSDARG00000002194	TRUE	0.878879	RHD
				0.3	1	4	8	8	5	10	8	6	5	6	8	9	10	ENSDARG00000002196	TRUE	0.48004	BACH1B
3	7	54	48	39	16	13	6	3	3	3	3	2	3	15	47	53	40	ENSDARG00000002197	TRUE	1.02258	PYGL
									2	15	22	20	9	24	36	38	37	ENSDARG00000002204	TRUE	0.565211	HSPB11
	0.8	4	7	4	2	3	3	4	3	4	3	2	3	5	11	10	9	ENSDARG00000002210	TRUE	0.640772	STK25A
4	4	8	4	3	1	2	4	6	5	5	4	3	4	2	3	3	2	ENSDARG00000002213	FALSE	0.440057	INVS
44	41	112	93	74	130	213	255	146	115	114	94	89	104	57	20	16	14	ENSDARG00000002215	TRUE	0.668822	RTCA
					0.9	6	16	26	19	16	17	15	12	15	17	15	15	ENSDARG00000002216	TRUE	0.411602	TBX3A
0.4	1	3	4	5	13	23	42	48	38	33	32	33	38	50	55	49	46	ENSDARG00000002217	TRUE	0.675249	SCOCB
											0.5	0.4	0.4	0.7	2	9	9	ENSDARG00000002219	TRUE	1.28537	SI:DKEY-103J14.5
14	21	114	139	83	109	139	121	73	61	54	50	39	35	35	29	29	24	ENSDARG00000002220	FALSE	0.651786	ZGC:103692
				0.3	1	3	3	13	6	5	5	14	20	36	204	151	130	ENSDARG00000002230	TRUE	1.5884	SYPB
0.4	2	12	15	11	4	0.9				0.4	2	2	2	2	2	5	3	ENSDARG00000002231	TRUE	1.08023	PLPP2A
1	1	0.5	0.5	3	3	2	1	10	14	18	21	20	21	24	45	44	35	ENSDARG00000002235	TRUE	1.02172	MMP14A
0.6	1	4	4	17	82	129	180	226	247	226	188	165	195	135	105	85	67	ENSDARG00000002240	TRUE	0.752987	PSMB6
					2	3	2								1	2	2	ENSDARG00000002241	TRUE	0.316228	LOC100537815
1	1	3	3	2	1	0.7		0.7	0.7	2	1	2	2	4	6	11	17	ENSDARG00000002249	FALSE	1.27311	TBXAS1
0.7	3	9	5	8	4	3	4	3	3	7	7	10	14	18	30	27	22	ENSDARG00000002255	TRUE	0.890955	EPB41L3A
														0.5	0.5	3	4	ENSDARG00000002259	TRUE	0.889757	CA15C
1	1	14	15	8	17	22	43	51	44	46	33	39	50	38	42	42	26	ENSDARG00000002264	FALSE	0.568324	MRPL41
53	30	162	158	172	163	154	107	99	87	73	43	30	30	21	22	20	20	ENSDARG00000002267	FALSE	0.731032	DCAF13
138	118	688	692	484	304	258	153	60	53	63	58	55	68	66	82	66	84	ENSDARG00000002271	TRUE	1.09697	ZFAND5B
7	20	45	39	28	25	12	11	14	10	12	11	11	11	11	15	11	11	ENSDARG00000002285	TRUE	0.630199	MCOLN1A
							0.6											ENSDARG00000002293	TRUE		SI:CH211-197G15.9
										0.2		0.1		0.8	2	3	2	ENSDARG00000002295	TRUE	0.860982	SI:DKEY-21P1.3
9	25	76	78	33	5	1	5	2	2	2	4	3	2	3	9	5	5	ENSDARG00000002298	TRUE	1.61208	ANKRD22
						0.4	1	1	2	4	4	4	3	4	4	6	4	ENSDARG00000002299	TRUE	0.535119	ARSH
								0.7	0.5					0.7	6	4	5	ENSDARG00000002300	TRUE	0.878701	P2RX2
535	341	107	113	60	18	13	16	38	62	54	51	44	32	21	11	12	5	ENSDARG00000002304	FALSE	1.59833	GINS2
378	287	238	204	157	31	10	5	15	21	31	46	47	56	56	65	67	58	ENSDARG00000002305	TRUE	1.09933	ME3
												10	20	104	118	51	22	ENSDARG00000002311	TRUE	0.854864	FABP4B
9	9	36	40	13	2	1	0.4				0.9	2	3	4	6	3	4	ENSDARG00000002330	TRUE	1.39072	LHX8A
2	3	24	30	19	16	17	17	18	14	12	12	12	11	10	8	8	9	ENSDARG00000002332	TRUE	0.514197	FRMD6
4	10	26	23	6	1	0.6	3	7	5	7	9	8	11	8	10	16	17	ENSDARG00000002333	TRUE	0.732695	FAM102BB
	0.2		0.5	0.5	53	74	81	89	65	42	32	36	59	27	18	17	18	ENSDARG00000002336	TRUE	0.763437	DLC
9	16	71	72	30	26	26	34	27	23	20	19	19	16	16	10	14	13	ENSDARG00000002339	FALSE	0.703603	SGF29
1169	698	627	636	665	373	514	620	1059	1095	1257	1182	1194	1481	1202	1065	758	640	ENSDARG00000002344	TRUE	0.352472	TUBB4B
132	283	117	132	136	71	63	49	20	5	5	9	1				0.4		ENSDARG00000002347	TRUE	1.10131	CYP11A1
			1	27	22	17	5	1	1	0.9	0.7	0.3	0.7	0.6	0.9	0.9	2	ENSDARG00000002353	TRUE	1.64183	TAGAPA
	2	5	5	3	2	3	3	2	1	1	1	0.6	1	1	2	3	1	ENSDARG00000002355	TRUE	0.63136	SHPK
44	42	15	9	11	17	27	36	25	17	14	14	17	20	26	34	33	39	ENSDARG00000002362	TRUE	0.457102	UBALD1A
236	225	89	84	53	35	28	30	33	29	36	38	38	23	25	26	25	23	ENSDARG00000002365	TRUE	1.08712	CERS5
409	309	481	431	422	661	790	460	311	244	261	282	236	256	213	197	170	186	ENSDARG00000002369	TRUE	0.481177	NA
69	59	110	102	61	23	21	24	12	8	12	13	13	12	12	10	12	10	ENSDARG00000002377	TRUE	1.0172	MIEF2
2	2	9	10	2	0.5	0.7	2	4	4	5	5	4	4	3	2	3	3	ENSDARG00000002385	TRUE	0.691226	ATM
												0.8	0.8	2	8	12	13	ENSDARG00000002391	TRUE	0.924509	TLCD1
															8	17	7	ENSDARG00000002394	TRUE	0.516335	UGT5D1
23	42	149	137	81	19	20	23	18	31	38	22	9	12	7	12	13	19	ENSDARG00000002396	TRUE	1.11952	CRY-DASH
11	16	110	121	122	86	43	26	28	31	47	59	46	36	29	23	24	8	ENSDARG00000002401	TRUE	0.766451	GALE
4	7	31	33	27	34	31	33	29	23	26	28	22	22	20	16	17	13	ENSDARG00000002402	FALSE	0.385269	ERCC3
76	71	258	225	89	163	272	219	146	131	132	127	121	111	83	32	30	23	ENSDARG00000002403	FALSE	0.587586	NUSAP1
		0.9	0.7	1	0.1	0.3	0.2	1	4	10	6	5	5	3	8	6	6	ENSDARG00000002405	TRUE	0.87253	SI:CH211-225B11.1
0.5	1	7	6	3	2			1	2	3	2	2	3	1	1	1	0.7	ENSDARG00000002406	TRUE	0.821652	ZMYND10
							0.2	2	0.5	1	2	2	1	0.8	2	3	3	ENSDARG00000002411	TRUE	0.599259	PDE4CB
			0.2		6	27	84	52	31	34	26	14	10	19	9	8	8	ENSDARG00000002445	TRUE	0.953111	PRDM1A
18	54	59	58	24	19	14	10	8	6	5	6	4	3	3	2	3	3	ENSDARG00000002463	TRUE	1.18332	ARHGEF37
16	28	71	72	61	15	11	20	22	21	20	14	9	10	10	15	16	16	ENSDARG00000002467	TRUE	0.827019	RDH14B
10	15	74	78	72	84	86	65	27	21	29	38	29	22	13	8	8	5	ENSDARG00000002479	TRUE	0.777934	ERCC6L
								6	3	2	1	2	0.4	1	2	2	3	ENSDARG00000002483	TRUE	0.697725	LOC568110
0.5	0.9	7	8	13	43	79	103	104	86	79	52	32	27	18	17	15	15	ENSDARG00000002487	FALSE	0.921184	NOC3L
2	2	15	19	4	0.5			2	4	6	7	3	4	5	7	7	8	ENSDARG00000002494	TRUE	0.817613	ITGB6
133	167	98	67	52	111	117	103	44	54	59	55	53	55	48	40	38	29	ENSDARG00000002506	FALSE	0.523147	ZGC:92818
				0.2	0.2	1	2	0.1	1	2	2	1	1	3	5	4	4	ENSDARG00000002507	TRUE	0.827952	ITGA10
								0.8	0.6	0.6					2	0.8	1	ENSDARG00000002508	TRUE	0.546092	ANKRD33AB
2	3	5	9	21	31	11	3	0.7	1	0.3	2	2	0.5	0.5	2	2	2	ENSDARG00000002509	TRUE	1.50378	ZGC:153911
								3	3	5	3	2	2	3	2	2	2	ENSDARG00000002510	TRUE	0.351364	DMBX1B
77	62	42	40	34	33	35	30	41	38	45	46	41	37	29	38	47	29	ENSDARG00000002523	TRUE	0.287821	HSDL2
				1				3	1	2	3	2	1	0.7	1	1	2	ENSDARG00000002533	TRUE	0.520296	ADORA2B
126	210	253	211	184	174	147	123	72	47	51	62	47	36	31	37	31	25	ENSDARG00000002536	TRUE	0.728211	TM9SF4
219	176	167	134	129	181	223	190	115	100	91	73	55	64	52	35	31	25	ENSDARG00000002538	TRUE	0.575438	SMU1A
12	36	32	43	24	10	7	0.6	0.6	2	5	5	9	16	29	30	23	25	ENSDARG00000002546	TRUE	0.775057	RUNDC3AB
10	7	19	23	20	9	8	1	3	4	5	6	6	5	4	5	5	6	ENSDARG00000002549	TRUE	0.762215	EIF3EB
110	126	248	237	194	136	111	115	88	74	76	70	62	51	35	34	30	26	ENSDARG00000002552	TRUE	0.664499	MAPKAPK2A
2	4	3	2	3	1	0.5			1	5	14	22	27	27	44	45	47	ENSDARG00000002564	TRUE	1.12576	SYNGR1A
3	7	24	28	18	14	8	9	10	5	10	13	15	11	11	13	15	12	ENSDARG00000002571	TRUE	0.49038	TMOD2
								2	0.5	0.4					5	6	5	ENSDARG00000002576	TRUE	0.788875	CABP5A
0.1	0.2	0.2	0.3	0.4	0.3	0.4	0.5	1	2	3	6	8	12	13	10	9	8	ENSDARG00000002582	TRUE	1.12153	TBX15
	0.1		0.4	0.7	1	0.8	1	8	18	31	31	56	117	147	110	93	80	ENSDARG00000002587	TRUE	1.15426	DPYSL3
3	2	3	3	4	2	2	2	2	2	15	281	1377	2025	3809	4144	3242	2630	ENSDARG00000002589	TRUE	1.53516	MYLPFB
352	346	290	242	129	138	178	192	186	146	142	121	93	87	66	48	41	28	ENSDARG00000002591	TRUE	0.624312	RUVBL1
						0.4			0.4	8	31	37	40	58	38	32	36	ENSDARG00000002593	TRUE	0.675435	SLC45A2
92	247	194	124	103	46	11	3	1	0.6			0.3						ENSDARG00000002597	TRUE	1.15076	PABPC1L
							0.3	0.3			0.1	0.6	1	2	10	17	16	ENSDARG00000002600	TRUE	1.34874	PCSK1
			38	117	70	141	239	108	41	23	14	8	8	10	8	5	4	ENSDARG00000002601	TRUE	1.22615	IRX7
0.2	0.1	0.5		0.1				0.2	0.2	0.4	1	2	4	6	5	5	7	ENSDARG00000002607	TRUE	1.12778	UNM_SA1614
0.5	2	5	3	4	3	3	11	28	16	11	7	6	10	8	9	8	8	ENSDARG00000002609	TRUE	0.801311	RNF145A
454	426	215	327	253	237	161	85	118	136	125	117	108	89	54	35	32	19	ENSDARG00000002613	FALSE	0.777718	RPA3
5	9	26	23	20	26	23	15	27	34	49	57	56	48	56	58	53	47	ENSDARG00000002632	TRUE	0.509661	ANXA11B
		0.5	0.5	0.9	22	25	26	15	9	9	10	15	10	19	17	17	13	ENSDARG00000002634	TRUE	0.618723	NA
											0.7	0.9	2	3	11	11	14	ENSDARG00000002635	TRUE	0.932065	ZGC:85722
23	25	33	30	19	11	14	20	31	25	33	31	26	19	18	18	20	16	ENSDARG00000002642	TRUE	0.293608	SH3GL1B
				3	3	4	3	0.9	0.8	2	3	5	1	5	27	42	36	ENSDARG00000002644	TRUE	1.454	RGS5A
	0.2	1	1	0.9	0.2			0.5	0.6	1	1	2	3	4	11	13	14	ENSDARG00000002656	TRUE	1.36459	STXBP5A
63	135	192	201	212	251	233	189	182	163	165	125	113	146	108	78	53	33	ENSDARG00000002659	TRUE	0.43058	MAPRE1B
6	7	14	13	3	0.4	0.4	2	10	8	13	20	17	12	11	17	19	17	ENSDARG00000002663	TRUE	0.603311	OPTN
10	18	38	36	36	16	9	6	3	2	2	5	4	4	4	4	3	4	ENSDARG00000002666	TRUE	1.10206	KCNJ1B
107	89	75	73	57	24	23	23	23	22	22	16	15	19	17	13	18	20	ENSDARG00000002670	FALSE	0.810168	ZGC:113944
0.8	2	12	12	9	2	1	2	1	2	3	3	2	4	3	5	8	9	ENSDARG00000002682	TRUE	0.840405	TBCELA
308	302	223	201	168	54	23	2	0.5										ENSDARG00000002685	FALSE	0.879281	FAM113
9	11	18	36	14	9	13	14	25	24	22	23	25	25	23	20	15	9	ENSDARG00000002690	FALSE	0.397047	RABIF
0.9	1	0.7		2	0.6	1	0.4	0.5	0.3				0.2	0.4	469	617	525	ENSDARG00000002696	TRUE	1.99084	GNB3B
				0.4	0.5	0.2	0.3	0.4	0.3	0.7	0.5	0.3	0.7	0.7	1	2	2	ENSDARG00000002701	TRUE	0.819756	RASL12
		0.8	13	80	21	15	37	28	11	10	4	2	0.9	0.7				ENSDARG00000002707	TRUE	1.27844	HER11
98	179	791	765	936	1555	1796	1922	1733	1084	1004	684	370	390	212	234	205	240	ENSDARG00000002710	TRUE	0.778475	NCL
15	20	62	57	66	115	145	132	103	92	79	55	34	35	20	16	15	15	ENSDARG00000002720	FALSE	0.71727	UTP15
																0.8	0.9	ENSDARG00000002728	TRUE	0.083189	KISS1RA
10	13	46	52	41	43	37	44	60	38	61	99	90	62	86	108	130	111	ENSDARG00000002731	TRUE	0.541093	SDC2
	0.4							0.4			2	1	2	4	18	21	17	ENSDARG00000002732	TRUE	1.1828	SPON2B
4	15	84	99	55	36	69	117	93	73	78	83	98	91	98	121	130	284	ENSDARG00000002745	TRUE	0.652805	TDH
5	8	18	16	13	4	5	7	9	8	6	5	4	5	4	9	9	11	ENSDARG00000002748	TRUE	0.509012	SEMA6D
1	2	13	7	6	4	4	5	4	3	4	4	4	6	7	4	4	3	ENSDARG00000002750	TRUE	0.547444	PHF20A
25	14	7	8	6	6	10	17	28	24	23	19	13	10	8	7	9	10	ENSDARG00000002754	TRUE	0.536892	PDCD2L
37	49	38	29	18	22	23	28	24	31	29	16	18	23	28	43	67	124	ENSDARG00000002758	TRUE	0.704621	DEDD1
1	3	6	4	2	0.3									0.7	3	2	3	ENSDARG00000002760	TRUE	0.680914	GDF5
										2	11	14	4	14	15	29	43	ENSDARG00000002764	FALSE	0.816336	MIOX
3	3	3	3	5	4	4	4	3	4	29	327	1796	3940	6840	9858	9239	10432	ENSDARG00000002768	TRUE	1.64582	PVALB2
	0.2														6	5	4	ENSDARG00000002771	TRUE	0.667128	SLC4A5A
															0.8		1	ENSDARG00000002773	FALSE	0.157135	NA
2	4	17	9	11	8	7	6	0.8	5	4	2	3	2	3	7	8	9	ENSDARG00000002779	TRUE	0.672843	PDX1
124	143	175	151	82	23	40	75	112	92	79	63	54	77	55	35	35	31	ENSDARG00000002787	TRUE	0.557237	TLE3A
1	6	52	62	62	57	54	51	135	176	192	201	200	197	188	212	193	172	ENSDARG00000002790	TRUE	0.624415	AP2M1A
85	121	178	163	158	166	182	150	101	74	92	110	96	66	71	128	138	124	ENSDARG00000002791	TRUE	0.308902	ATP1A1A.1
47	62	188	194	191	128	85	63	82	62	69	66	57	48	48	47	35	23	ENSDARG00000002792	TRUE	0.655763	ARCN1A
								0.3	0.3		0.1	0.5	0.2	0.6	0.4	2	3	ENSDARG00000002794	FALSE	1.20978	NA
		2	0.7	0.6	3	7	58	109	64	69	76	64	60	48	25	18	17	ENSDARG00000002795	TRUE	0.868307	MEIS3
								2	0.9		1							ENSDARG00000002797	TRUE	0.467905	NA
6	10	42	39	27	12	13	13	14	10	11	14	11	11	10	11	9	9	ENSDARG00000002798	FALSE	0.673299	COG8
														0.1	0.8	1	2	ENSDARG00000002816	TRUE	0.804872	RASGRF2B
119	143	127	109	26	11	19	29	30	33	24	26	21	25	12	8	7	7	ENSDARG00000002826	TRUE	1.06413	CEP57L1
22	41	81	66	67	22	6	2	24	27	38	26	15	17	9	9	9	8	ENSDARG00000002830	TRUE	0.84961	TRMT2A
0.6	0.5	0.9	0.7	0.5	0.3	0.2			0.3	2	5	5	3	2	2	2	1	ENSDARG00000002831	TRUE	0.95507	COL4A4
3	4	11	10	8	6	4	2	8	8	10	10	12	23	27	36	32	28	ENSDARG00000002840	TRUE	0.795891	SI:DKEY-28B4.8
0.6	0.2	1	2	1	0.4	0.5	0.1		0.1	0.4	0.9	2	2	2	2	4	4	ENSDARG00000002847	TRUE	0.900034	FNDC1
7	8	11	16	4	8	10	15	9	7	8	7	8	8	11	8	8	7	ENSDARG00000002872	TRUE	0.324887	ZGC:113210
27	64	87	87	35	12	11	13	17	13	17	15	13	15	11	11	12	14	ENSDARG00000002877	TRUE	0.969832	REPS1
2	4	12	20	7	0.8	0.2	0.3	4	4	6	6	6	8	7	10	10	8	ENSDARG00000002880	TRUE	0.749856	VPS50
4	6	54	60	49	27	24	27	35	31	25	18	17	18	13	12	9	10	ENSDARG00000002894	FALSE	0.669929	AVEN
0.3	1	1	1	3	1	0.5	1	4	4	4	4	5	4	6	8	8	7	ENSDARG00000002897	TRUE	0.739748	SI:CH211-160O17.2
174	163	201	173	139	131	106	53	14	12	19	23	21	14	14	15	20	18	ENSDARG00000002909	TRUE	0.973739	TJP3
57	66	150	182	39	19	20	21	38	29	28	24	24	40	39	45	40	37	ENSDARG00000002912	TRUE	0.889641	ADIPOR1A
4	9	37	41	32	27	15	11	11	7	9	8	8	10	8	8	11	12	ENSDARG00000002916	TRUE	0.751409	SEC31B
									0.8	0.8	0.5	0.6	1	0.4	4	10	13	ENSDARG00000002917	TRUE	1.37491	GLS2B
		6	4	2	0.4		0.4	38	20	17	17	13	14	23	16	12	12	ENSDARG00000002933	TRUE	0.766304	GBX2
2	2	2	3	4	3	3	5	33	54	59	56	52	49	41	31	26	21	ENSDARG00000002937	TRUE	0.903251	MEIS1A
2	1	3	5	3	2	2	0.3	2	0.7	0.9	1	1	2	3	7	10	10	ENSDARG00000002945	TRUE	0.962182	BGNB
3	6	14	18	12	7	6	6	10	4	6	10	7	5	6	11	13	8	ENSDARG00000002947	TRUE	0.465289	ABCD3B
188	304	292	270	196	145	128	128	148	131	136	113	110	104	91	88	76	63	ENSDARG00000002949	TRUE	0.479986	PPP6C
	0.8	4	3	9	43	54	70	73	62	58	39	35	38	21	13	11	10	ENSDARG00000002952	TRUE	0.778971	SMO
5	7	2	3	2	1	0.7	0.4	0.3	0.1	0.3	0.7	0.6	0.3	0.7	0.6	1	1	ENSDARG00000002956	TRUE	1.23472	SI:DKEY-32N7.4
				0.7	1	0.6												ENSDARG00000002959	TRUE	0.271522	GPR34B
74	93	88	91	57	33	20	34	29	24	24	33	32	27	38	50	46	46	ENSDARG00000002967	TRUE	0.518991	PDAP1B
					6	20	41	10	1	4	17	12	2	8	29	41	30	ENSDARG00000002968	TRUE	0.83189	A1CF
40	74	183	175	201	297	387	369	200	180	171	140	125	147	119	80	67	65	ENSDARG00000002970	TRUE	0.590374	SS18
7	12	43	44	40	41	44	47	34	30	33	28	25	29	16	10	11	10	ENSDARG00000002971	TRUE	0.494872	PHC1
0.7	0.5							0.4			2				2	16	22	ENSDARG00000002986	FALSE	1.43201	GDA
									0.8	3	26	139	216	337	314	251	214	ENSDARG00000002988	TRUE	0.785781	TNNT2D
54	60	43	40	17	9	13	21	20	15	13	12	10	11	7	6	6	4	ENSDARG00000002991	TRUE	0.855198	CEP135
53	63	129	137	71	13	6	9	12	11	17	14	14	18	17	24	25	22	ENSDARG00000002994	TRUE	1.09365	ITPKCA
0.5	2	3	3	3	1	2	4	8	8	11	11	10	11	14	18	21	23	ENSDARG00000003008	TRUE	0.816517	PRKCEA
99	144	339	364	183	116	89	80	79	70	63	48	43	46	49	73	59	42	ENSDARG00000003017	TRUE	0.863904	UBE2AL
								0.8	0.4	2	2	2	4	5	12	14	16	ENSDARG00000003020	TRUE	1.01016	LRRC4.2
26	33	22	21	27	23	18	10	9	10	9	9	8	5	7	6	5	3	ENSDARG00000003021	TRUE	0.656097	HDAC8
			0.9	2	0.4	0.8	1	8	6	9	10	8	8	8	8	8	7	ENSDARG00000003022	TRUE	0.621061	LIMK1B
2	9	62	77	53	15	9	6	8	6	5	5	6	4	6	4	6	5	ENSDARG00000003027	FALSE	1.41519	SCNM1
59	77	79	103	93	69	44	33	77	103	178	246	325	266	375	414	415	449	ENSDARG00000003032	TRUE	0.779411	EIF4A1B
26	36	180	196	157	174	162	146	125	99	144	137	95	88	69	94	82	63	ENSDARG00000003035	TRUE	0.434268	HSPA9
11	37	27	21	12	3	2	2	5	3	4	5	5	5	4	4	5	4	ENSDARG00000003041	TRUE	1.10324	LOC100334245
3	5	9	10	5	2	1	1	2	1	2	2	3	4	5	4	6	6	ENSDARG00000003046	TRUE	0.664935	SORBS2A
						0.2	0.4	0.3	0.2		0.1				0.5	1	1	ENSDARG00000003054	TRUE	0.766076	TACR3L
16	14	7	7	4	9	12	24	29	29	30	23	20	25	19	18	16	16	ENSDARG00000003058	FALSE	0.45158	CEP43
3	6	5	5	10	8	8	15	38	52	61	63	56	50	38	24	17	9	ENSDARG00000003061	TRUE	0.846976	CD276
13	27	32	30	27	26	16	23	34	24	28	21	17	16	15	19	16	13	ENSDARG00000003068	TRUE	0.304933	GORASP1A
3	4	27	30	10	3	2	3	1	1	1	2	2	2	3	2	3	3	ENSDARG00000003069	FALSE	1.50959	BTBD7
								0.4	0.7		0.3	2	5	10	12	11	16	ENSDARG00000003077	TRUE	0.935288	GPX9
	0.4	0.8		0.4	1	2	2	35	65	179	451	805	1090	1333	1374	1267	1263	ENSDARG00000003081	TRUE	1.18247	MYBPHB
0.5	2	27	16	16	2	0.5		0.8	0.2	0.6	0.7	0.6	0.9	1	2	2	3	ENSDARG00000003084	TRUE	1.7119	SPIRE2
2	5	9	11	6	3	5	5	9	5	5	3	3	3	3	6	4	4	ENSDARG00000003085	TRUE	0.482001	STAMBPL1
7	16	49	46	19	8	9	10	13	17	15	18	15	13	19	20	26	29	ENSDARG00000003087	TRUE	0.605141	UBXN6
211	160	143	130	98	65	48	47	28	15	18	26	23	11	17	17	22	22	ENSDARG00000003091	TRUE	0.992657	OCLNB
8	7	27	39	46	50	58	70	88	63	65	70	71	75	92	66	57	52	ENSDARG00000003098	TRUE	0.424241	KDM5BB
12	28	34	29	32	16	9	14	52	24	33	30	23	16	23	24	24	20	ENSDARG00000003109	TRUE	0.408023	RCAN1A
							0.3	0.4		0.3	1	2	6	16	60	202	297	ENSDARG00000003113	TRUE	1.79001	ADA
71	96	104	111	78	84	95	108	90	72	77	67	61	69	43	56	59	68	ENSDARG00000003127	FALSE	0.244039	ZGC:123105
	2	6	7	16	39	55	72	130	116	109	103	74	66	56	58	56	63	ENSDARG00000003132	FALSE	0.64306	APIP
4	3	1	2	0.3	0.3	0.2	1	4	3	5	6	8	8	13	12	10	11	ENSDARG00000003142	TRUE	0.838713	DACHC
8	33	32	32	36	31	19	8	10	7	7	4	3	4	3	7	10	13	ENSDARG00000003144	TRUE	0.815653	PXMP2
		1		0.7				0.7	0.6		0.5	2	0.7	2	3	4	4	ENSDARG00000003145	FALSE	0.780666	NA
				0.3							0.3	2	2	5	10	13	14	ENSDARG00000003146	TRUE	0.977044	LOC567924
765	663	387	389	488	497	429	384	507	569	476	399	356	420	334	330	289	264	ENSDARG00000003151	FALSE	0.289793	SKP1
87	93	188	225	207	258	292	282	209	183	169	161	141	124	102	68	57	40	ENSDARG00000003153	FALSE	0.479436	NUDT21
5	7	8	11	5	4	4	6	7	6	6	4	4	5	4	5	4	4	ENSDARG00000003157	FALSE	0.33728	NFKBIL1
				0.2	7	12	13	39	56	77	81	70	55	25	21	24	24	ENSDARG00000003165	TRUE	0.75036	NR2F6B
6	7	17	21	19	13	6	4	9	10	10	8	8	8	7	8	9	7	ENSDARG00000003167	FALSE	0.476034	MLST8
10	10	29	24	27	59	73	68	21	16	20	22	23	28	28	28	29	29	ENSDARG00000003169	TRUE	0.594241	MAGI1B
10	10	27	26	19	9	7	10	29	29	30	21	20	20	18	18	14	14	ENSDARG00000003175	TRUE	0.411259	STX5AL
										1	5	7	3	12	6	4	6	ENSDARG00000003181	TRUE	0.591159	SULT1ST4
6	10	43	41	35	39	55	58	91	86	104	97	78	107	69	54	48	34	ENSDARG00000003189	TRUE	0.515819	PSMD1
				37	42	33	18	6	9	9	8	7	5	7	7	12	10	ENSDARG00000003193	TRUE	0.842057	RASSF7B
23	37	147	175	159	49	37	35	24	21	23	18	17	20	17	17	18	17	ENSDARG00000003197	TRUE	1.11578	LOC110437968
6	9	68	89	37	21	25	31	26	26	29	23	20	25	12	6	6	4	ENSDARG00000003200	TRUE	0.850058	FOXM1
							4	0.3							62	61	66	ENSDARG00000003203	TRUE	0.864123	RHCGA
34	39	39	34	20	31	38	37	28	19	17	15	14	16	13	12	14	9	ENSDARG00000003205	FALSE	0.455611	NGLY1
0.6	4	49	57	49	22	7	2	2	3	5	6	9	10	14	18	16	15	ENSDARG00000003206	TRUE	1.09429	CHCHD6A
3	5	24	29	15	13	14	19	10	15	15	12	9	11	11	11	11	19	ENSDARG00000003207	FALSE	0.455916	MTERF3
0.3	1	3	3	3	3	4	5	6	5	5	4	5	5	4	6	6	7	ENSDARG00000003208	FALSE	0.418417	POMK
													0.3	1	9	10	12	ENSDARG00000003210	TRUE	0.838746	NA
129	177	237	204	215	215	206	120	108	86	95	101	79	72	50	46	45	41	ENSDARG00000003213	TRUE	0.547004	NAA15A
							5	116	58	71	89	118	85	111	92	130	109	ENSDARG00000003216	TRUE	0.395212	ANXA2A
10	17	50	49	36	11	8	14	22	15	14	10	7	6	4	4	4	4	ENSDARG00000003217	FALSE	0.920167	URB2
			0.6	17	11	7	0.4	1	1	3	10	9	5	9	37	43	28	ENSDARG00000003219	TRUE	1.11258	BIN2A
14	23	53	51	24	4	0.7	0.4	0.4	0.8	0.6								ENSDARG00000003229	TRUE	1.28659	GDF9
39	66	121	97	80	89	93	87	67	56	52	43	30	38	25	22	18	16	ENSDARG00000003235	FALSE	0.543047	NUP88
2	4	25	34	7	3	1	1	7	4	5	2	2	2	2	2	2	2	ENSDARG00000003244	TRUE	1.49518	SI:CH211-195H23.3
9	16	41	29	7	0.5				0.1	0.1	0.8		0.2	0.6	2	3	3	ENSDARG00000003250	TRUE	1.55804	PIK3CD
2	5	42	42	21	7	4	3	5	3	3	3	4	6	5	4	4	5	ENSDARG00000003251	TRUE	1.34777	ZBTB22B
3	5	2	4	3	7	6	8	11	5	7	9	6	5	7	7	7	6	ENSDARG00000003257	TRUE	0.370479	ZGC:101559
														2	11	13	7	ENSDARG00000003259	TRUE	0.588638	LOXA
9	19	37	37	36	23	15	16	24	18	24	27	23	21	22	29	26	24	ENSDARG00000003269	TRUE	0.315514	CLCN3
12	33	52	61	55	50	26	13	23	19	21	17	12	12	10	14	16	16	ENSDARG00000003270	FALSE	0.660515	DHPS
1	0.8	3	3	5	22	34	22	19	16	12	16	13	8	13	32	34	58	ENSDARG00000003281	TRUE	0.855184	PIK3IP1
6	19	94	101	73	57	41	57	118	92	74	57	29	27	19	17	15	15	ENSDARG00000003287	TRUE	0.688107	WDR12
								0.3		0.2	0.7	0.8	2	3	4	4	5	ENSDARG00000003290	TRUE	0.823874	DAB1B
		2		2	0.5	2	5	16	14	29	24	23	32	44	38	39	37	ENSDARG00000003293	TRUE	0.763034	SOX9A
																0.9		ENSDARG00000003303	TRUE		STC1
3	8	17	13	7	13	13	16	19	16	16	11	12	15	13	11	12	10	ENSDARG00000003307	TRUE	0.311958	STX16
29	39	86	93	94	58	32	37	128	125	149	127	127	151	123	118	100	73	ENSDARG00000003308	FALSE	0.433795	EMC2
9	6	8	8	4	7	7	13	19	19	20	16	15	16	20	32	52	70	ENSDARG00000003311	TRUE	0.901183	PANK2
				9	90	85	33	3	2	3	5	4	3	3	7	6	5	ENSDARG00000003313	TRUE	1.64393	EPS8L1B
5	7	32	35	21	9	7	9	6	6	10	13	12	14	14	23	22	20	ENSDARG00000003320	FALSE	0.608341	FAM91A1
			1					0.5		0.3					5	5	6	ENSDARG00000003326	TRUE	0.885861	CACNG5A
7	7	39	40	14	2	2	3	5	5	5	5	5	5	3	3	4	4	ENSDARG00000003328	FALSE	1.30921	SLF2
				0.5	0.2	0.5	0.3	0.3							0.1	0.4	0.8	ENSDARG00000003344	TRUE	0.559258	TRPC2B
	2	16	20	25	44	68	64	39	48	46	50	46	32	40	29	29	22	ENSDARG00000003373	FALSE	0.468754	COMMD2
		1	0.9	0.9	0.8	4	7	16	23	25	30	23	22	25	29	24	17	ENSDARG00000003375	TRUE	0.716617	GNG12A
0.7	3	2	0.9	1	2	2	1	2	1	2	2	2	4	5	9	19	14	ENSDARG00000003380	TRUE	1.24328	SI:DKEY-275B16.2
11	4	21	17	8	2				0.4	0.6	3	6	2	5	5	6	6	ENSDARG00000003381	TRUE	0.90477	SI:CH211-266G18.6
98	119	132	140	141	109	78	51	68	64	53	39	34	40	35	28	26	30	ENSDARG00000003382	FALSE	0.577478	CWC25
68	100	152	134	35	5	2	2	4	5	8	9	13	19	23	34	34	31	ENSDARG00000003383	FALSE	1.22039	ASB8
0.1	1	1	2	0.4	0.1				0.7	3	6	3	3	2	2	2	2	ENSDARG00000003395	TRUE	0.804803	COL4A3
37	70	105	111	79	40	28	25	29	26	26	21	20	23	15	10	10	9	ENSDARG00000003398	TRUE	0.830758	RBPJA
			0.9	37	50	40	52	97	57	34	15	8	8	5	4	4	3	ENSDARG00000003399	TRUE	1.0102	FGF8A
	0.5	0.9	1	0.3		0.1	0.2	1	1	0.6	1	2	2	4	8	9	11	ENSDARG00000003403	TRUE	1.30877	TENM1
				7	27	62	94	35	19	24	17	14	14	13	8	9	9	ENSDARG00000003411	TRUE	0.97708	FOXA2
									0.6	2	3	2	2	3	2	2	2	ENSDARG00000003414	TRUE	0.33871	CAPSLB
						2	2	0.5	0.8	1	6	7	6	6	8	11	9	ENSDARG00000003420	TRUE	0.72154	CHRNA5
13	11	11	9	5	1	0.7	0.3	0.6	0.6	1	2	3	4	3	6	8	9	ENSDARG00000003421	TRUE	0.867428	IGF2BP2A
79	156	195	190	201	312	361	375	403	296	308	296	268	291	255	256	225	195	ENSDARG00000003429	TRUE	0.316392	HNRNPDL
		3	3	3	0.8	2	3	17	22	23	17	16	23	14	18	29	36	ENSDARG00000003444	TRUE	0.756999	DHRS7
20	26	62	76	28	18	14	12	9	10	14	11	12	9	11	10	10	7	ENSDARG00000003446	FALSE	0.947974	IPPK
0.8	2	8	8	6	4	1	0.3	0.3	0.3	0.5	0.4	0.5	0.9	0.9	2	3	3	ENSDARG00000003449	TRUE	1.10589	PDE10A
4	7	16	15	6	3	1	1	2	1	3	3	2	1	0.9	0.6	1	2	ENSDARG00000003462	FALSE	1.18988	FECH
								22	32	48	54	106	206	146	53	43	47	ENSDARG00000003469	TRUE	0.778759	NEUROD4
												0.5	0.6		1	3	3	ENSDARG00000003475	TRUE	0.786159	SULT1ST5
366	318	226	183	215	271	302	249	182	150	138	121	107	115	99	87	77	63	ENSDARG00000003486	TRUE	0.499829	PPP1CAA
76	68	73	74	65	71	81	91	113	94	99	85	65	67	43	38	32	26	ENSDARG00000003487	FALSE	0.334064	NUP93
1	2	19	29	12	4	2	1	9	11	12	10	10	14	14	25	26	28	ENSDARG00000003495	FALSE	0.733803	MADD
	0.2	1	1	0.9				2	3	4	6	7	7	9	20	20	21	ENSDARG00000003512	TRUE	1.03681	ANKS1B
0.6	2	11	11	7	6	5	6	14	10	14	13	16	20	29	33	28	19	ENSDARG00000003517	TRUE	0.682095	IMPA1
0.9	2	7	8	10	11	7	8	23	23	27	18	14	15	12	13	17	12	ENSDARG00000003519	FALSE	0.556626	APRT
2	4	23	16	5	0.4	0.4	0.6	3	3	2	2	2	3	3	5	6	6	ENSDARG00000003520	TRUE	1.19674	TBC1D14
	0.5				1	1									3	10	2	ENSDARG00000003523	TRUE	1.22864	ITLN3
45	37	126	140	143	176	189	184	308	342	339	220	189	228	143	116	90	64	ENSDARG00000003526	TRUE	0.534573	PSMA5
11	18	32	24	28	94	124	132	125	118	91	71	44	41	28	25	24	25	ENSDARG00000003527	FALSE	0.737087	MAK16
205	408	383	360	440	561	622	424	181	142	144	119	101	114	101	68	53	45	ENSDARG00000003531	TRUE	0.74356	TCEA1
														0.4	3	4	3	ENSDARG00000003533	TRUE	0.592524	COL8A1B
59	66	78	62	48	24	8	1	2	2	3	2	3	3	3	5	6	6	ENSDARG00000003544	TRUE	1.29589	ADARB1B
1	1	31	52	53	61	76	90	125	119	109	62	49	52	31	30	25	29	ENSDARG00000003564	FALSE	0.663353	DOHH
24	55	186	203	147	68	38	35	16	20	33	79	107	102	129	142	104	48	ENSDARG00000003570	TRUE	0.678569	HSP90B1
2	8	28	32	13	6	10	8	13	26	34	33	33	42	44	41	30	28	ENSDARG00000003573	FALSE	0.570201	DCTN5
0.7	0.8	0.6	0.3	0.3				0.6	0.2	0.8	2	2	3	4	6	8	8	ENSDARG00000003576	TRUE	1.11154	KLHL32
14	15	19	18	7	2	2	2	8	9	9	9	10	11	14	19	25	21	ENSDARG00000003584	FALSE	0.567469	PLA2G7
0.6	4	5	5	4	11	16	14	13	17	23	21	17	19	15	14	14	11	ENSDARG00000003592	TRUE	0.514254	SURF1
176	319	263	260	599	844	885	1247	2525	3415	3687	3336	3380	2967	2637	2187	2255	2588	ENSDARG00000003599	FALSE	0.68294	RPL3
3	6	24	28	26	51	65	81	90	91	82	69	51	52	35	23	18	17	ENSDARG00000003607	TRUE	0.644626	NR2F6A
															4	25	27	ENSDARG00000003615	TRUE	0.682554	SLC26A3.2
40	48	100	94	63	45	39	42	28	22	23	24	23	24	22	22	25	22	ENSDARG00000003616	TRUE	0.614738	ARIH1
19	40	66	54	13	7	9	13	11	8	10	7	7	8	7	17	22	20	ENSDARG00000003631	TRUE	0.915414	CLOCKB
												3	4	4	8	9	6	ENSDARG00000003632	TRUE	0.427433	ZGC:172270
	0.6	4	1	0.6	5	5	9	15	13	13	17	12	7	10	15	30	19	ENSDARG00000003635	TRUE	0.74479	MOGAT3B
194	266	259	236	236	220	209	215	195	169	197	185	145	143	136	150	109	81	ENSDARG00000003641	FALSE	0.274047	TFG
10	14	43	41	30	17	22	28	13	17	22	16	18	18	18	24	23	20	ENSDARG00000003642	TRUE	0.404663	ZFYVE19
76	63	76	86	83	54	28	12	7	6	10	14	22	43	70	106	96	99	ENSDARG00000003655	TRUE	0.66954	TMEM59L
3	7	14	12	14	13	9	10	3	3	7	18	15	7	12	14	16	11	ENSDARG00000003675	TRUE	0.44209	CRYL1
1	2	5	3	2	0.2	0.1	0.1	3	5	7	9	12	19	35	32	30	30	ENSDARG00000003680	TRUE	1.14793	RUNX1T1
162	188	199	206	173	223	232	267	397	322	276	210	166	183	127	136	124	115	ENSDARG00000003681	FALSE	0.355769	EIF5
				0.1				2	5	14	21	17	13	6	5	6	4	ENSDARG00000003684	TRUE	0.79175	OBSL1A
111	118	133	125	138	131	123	110	142	131	124	126	112	94	73	70	61	54	ENSDARG00000003693	FALSE	0.250884	HARS
69	60	94	114	164	161	121	101	71	97	220	431	524	531	539	517	466	456	ENSDARG00000003695	TRUE	0.743068	VDAC3
									0.3	0.7	0.9	1	0.8	1	4	7	6	ENSDARG00000003697	TRUE	1.06458	SLC5A8L
7	9	26	34	13	5	3	4	10	7	9	8	7	8	7	8	8	8	ENSDARG00000003699	TRUE	0.766131	ATP7A
2422	3257	1829	1304	380	52	17	6	7	11	6	4	2	2	2	1	0.9	0.9	ENSDARG00000003701	TRUE	1.92663	CLDNG
4	6	5	7	3	2	2	1	5	8	13	25	28	37	43	56	66	73	ENSDARG00000003705	TRUE	1.11728	PRNPRS3
0.4	0.5	0.5	0.5	0.4	0.1	0.1		0.2	0.1	0.4	0.3	0.2	0.2	0.1	0.3	0.3	0.3	ENSDARG00000003706	TRUE	0.503993	RYR2B
								0.4	0.9	9	16	15	13	12	4	3	2	ENSDARG00000003732	TRUE	0.813799	MITFA
17	38	121	100	89	114	144	114	95	80	76	67	64	83	66	36	23	18	ENSDARG00000003749	TRUE	0.499706	POLB
7	9	25	28	21	34	35	57	52	31	44	77	53	21	18	13	11	12	ENSDARG00000003750	FALSE	0.640521	PFAS
22	33	39	40	16	6	5	6	6	6	8	7	7	9	7	9	8	8	ENSDARG00000003751	TRUE	0.877568	LATS1
6	13	15	16	12	7	3	1	9	11	15	15	15	21	20	26	35	41	ENSDARG00000003754	TRUE	0.659557	TSPAN2A
145	154	109	115	49	21	14	20	23	20	28	30	21	18	20	25	32	17	ENSDARG00000003757	TRUE	0.98602	CNPY1
8	12	45	46	21	10	10	10	9	8	9	8	6	9	5	4	5	5	ENSDARG00000003769	TRUE	0.976945	TADA2B
39	54	65	59	19	4	3	3	7	10	11	14	16	15	16	21	19	18	ENSDARG00000003776	TRUE	0.880765	PIP4K2AA
0.7	1	0.6	1	0.9	0.7	1	1	22	25	27	29	30	36	22	21	20	20	ENSDARG00000003779	TRUE	0.905286	CTNND2B
5	7	43	44	39	26	26	24	15	15	18	21	18	16	16	19	20	19	ENSDARG00000003789	TRUE	0.497779	DENND5B
6	14	121	149	157	132	133	144	208	309	406	534	584	543	610	722	716	664	ENSDARG00000003795	TRUE	0.739696	IDH2
										0.2	3	6	10	6	7	7	9	ENSDARG00000003797	TRUE	0.523489	ASB2A.1
									0.4	1	1	2	7	10	6	5	5	ENSDARG00000003803	TRUE	0.787813	NA
	0.4	0.5		4	26	24	21	2	0.5	5	52	123	59	135	162	193	169	ENSDARG00000003808	TRUE	1.149	AQP3A
7	12	60	72	52	20	13	16	17	12	16	23	19	15	15	16	18	20	ENSDARG00000003811	TRUE	0.770567	PLXNB2A
16	16	9	6	8	8	8	16	28	26	30	31	26	27	24	26	23	19	ENSDARG00000003818	TRUE	0.445806	PRKAG1
				0.2	0.2			0.8	0.9	2	3	2	10	16	83	117	124	ENSDARG00000003820	TRUE	1.61154	NR1D2A
	0.5	3	5	4	5	4	8	5	5	8	5	6	5	6	5	8	9	ENSDARG00000003822	TRUE	0.385168	ANKRD16
3	25	61	69	53	28	34	36	25	25	22	15	13	12	10	7	5	8	ENSDARG00000003827	TRUE	0.772633	SNAPC1B
39	33	60	58	45	21	13	16	43	36	36	30	24	27	24	29	27	23	ENSDARG00000003829	TRUE	0.398268	GALNT2
4	5	7	12	6	30	47	95	94	53	86	90	75	56	62	68	78	75	ENSDARG00000003835	TRUE	0.639483	STOM
0.3	2	2	2	2	2	2	2	6	8	7	5	6	6	6	6	4	4	ENSDARG00000003841	FALSE	0.565422	USB1
17	39	77	72	55	55	33	7	15	14	19	20	18	18	18	21	17	16	ENSDARG00000003845	TRUE	0.716101	CHM
9	15	23	21	18	42	67	71	61	45	67	50	46	48	38	44	34	23	ENSDARG00000003846	FALSE	0.474331	MRPL21
0.8	1	5	5	5	5	5	21	54	30	51	47	31	23	19	23	35	21	ENSDARG00000003854	TRUE	0.819872	ACSL1B
342	309	316	341	373	543	550	447	311	276	232	189	148	125	90	58	45	32	ENSDARG00000003860	TRUE	0.611216	CBX3A
	0.8	12	6	3	3	3	5	2	2	4	2	2	2	3	4	7	4	ENSDARG00000003865	TRUE	0.692978	PARD6B
39	38	63	63	71	115	148	164	121	95	109	99	91	89	84	96	87	79	ENSDARG00000003866	TRUE	0.35641	TM9SF2
0.5	0.3	1	1	1	1	0.3		1	2	2	1	0.9	2	2	4	3	3	ENSDARG00000003867	TRUE	0.683326	CDK20
64	45	42	39	23	13	16	14	19	24	27	30	24	24	21	30	34	21	ENSDARG00000003869	TRUE	0.449873	DECR1
33	88	62	35	26	7	3	4	14	14	16	16	13	16	19	18	16	14	ENSDARG00000003872	TRUE	0.919052	CCDC102A
0.3	0.5	3	3	1	0.5	0.2		1	0.5	2	2	3	3	8	10	9	9	ENSDARG00000003877	TRUE	1.04172	PBRM1
2	3	17	15	5	5	5	6	6	5	4	3	3	3	2	3	4	4	ENSDARG00000003899	TRUE	0.776626	ZDHHC23B
0.3		2	1	1	1		0.3	3	0.6	0.8	0.3	0.2	0.4	0.3	0.6	0.7	0.7	ENSDARG00000003900	TRUE	0.885761	GPR61L
						1	3	4	0.9	0.5				1	8	125	253	ENSDARG00000003902	TRUE	2.00305	CTSL.1
									1							2	2	ENSDARG00000003903	TRUE	0.34641	HAPLN2
1	4	31	30	8	2	1	0.5	0.2				0.2						ENSDARG00000003904	FALSE	1.56665	SYCP1
			0.3												0.8	5	5	ENSDARG00000003909	TRUE	0.928758	FTR01
73	68	124	101	26	25	25	27	22	20	19	14	16	18	13	12	13	13	ENSDARG00000003910	TRUE	0.953593	MED13B
474	708	623	695	888	1363	1546	1677	1504	1133	1009	803	614	642	407	297	237	194	ENSDARG00000003920	TRUE	0.559098	SETB
		2							1	3		1	1	2	3	3	2	ENSDARG00000003925	TRUE	0.433013	GJB9A
53	96	72	61	37	26	30	33	59	55	46	41	36	39	27	23	22	17	ENSDARG00000003927	FALSE	0.469773	CLDN12
21	39	63	78	69	124	140	110	13	4	9	27	33	35	41	44	110	71	ENSDARG00000003931	TRUE	0.719415	CNDP2
14	39	52	45	17	10	6	7	10	7	8	6	7	10	5	12	17	18	ENSDARG00000003934	TRUE	0.881366	NXNL2
405	345	209	160	86	98	114	123	227	220	225	225	168	129	71	56	55	41	ENSDARG00000003938	FALSE	0.609823	RPA1
4	7	12	12	17	27	35	38	39	38	38	30	26	29	21	20	14	10	ENSDARG00000003940	TRUE	0.506701	MTFR1L
41	65	72	61	58	103	114	136	109	103	84	56	38	44	28	22	19	13	ENSDARG00000003941	FALSE	0.562928	RRS1
144	238	818	838	607	224	124	137	207	251	373	368	378	374	356	353	342	298	ENSDARG00000003952	TRUE	0.578046	PFN2
8	13	12	8	3	2	2	2	12	5	5	5	7	7	6	10	14	11	ENSDARG00000003961	TRUE	0.537373	PARP3
9	8	16	12	5	2	3	9	19	22	39	35	21	24	28	26	25	25	ENSDARG00000003963	TRUE	0.595996	TRAF4A
	0.7							0.6	1	2	4	3	2	4	1	1	0.9	ENSDARG00000003965	TRUE	0.700879	TLX1
52	101	216	262	124	18	7	3											ENSDARG00000003968	TRUE	1.00201	LARP6B
												2	2	5	8	8	6	ENSDARG00000003970	TRUE	0.525321	TRIM35-13
							1	22	29	25	23	25	30	40	29	18	22	ENSDARG00000003971	TRUE	0.399218	ISL2A
34	54	62	56	22	7	8	12	5	3	5	8	6	4	5	6	8	6	ENSDARG00000003973	TRUE	1.15377	CHORDC1A
5	6	58	60	35	22	33	42	41	38	32	24	26	33	25	17	17	15	ENSDARG00000003974	TRUE	0.519213	SPOPLB
0.5	2	2	1	0.6	0.3	0.3	0.8	1	0.9	1	2	0.9	0.3	0.5	1	9	6	ENSDARG00000003977	TRUE	1.34547	ZGC:153896
1	2	28	35	26	28	26	18	15	10	11	11	9	9	7	8	9	7	ENSDARG00000003984	FALSE	0.690359	SI:DKEY-175G6.5
	0.1	0.7	0.1	0.2						0.1	0.1	0.1	0.4	0.5	1	2	3	ENSDARG00000003989	TRUE	1.32574	CRHR1
													0.5	4	8	14	10	ENSDARG00000003991	TRUE	0.717709	FHL2B
									0.3	3	4	6	5	8	18	15	13	ENSDARG00000003994	TRUE	0.745954	SYT9A
									0.2	0.2	0.2	0.5	1	3	5	7	7	ENSDARG00000003998	TRUE	1.09544	PHYHIPLA
						0.6	1		2	1	0.5	2	0.8	1	7	8	9	ENSDARG00000004015	TRUE	1.09801	ADCYAP1A
				12	57	74	58	25	19	17	11	11	15	13	25	21	14	ENSDARG00000004017	TRUE	0.775602	SPAG1A
3	6	20	26	3	0.7	2	6	7	6	7	5	4	5	5	7	4	3	ENSDARG00000004018	TRUE	0.946494	SI:CH211-236H17.3
							1	24	24	28	23	27	49	80	67	48	44	ENSDARG00000004023	TRUE	0.59672	ISL1
18	14	27	33	26	22	16	13	39	50	67	62	66	62	75	67	74	59	ENSDARG00000004034	TRUE	0.520624	ARHGDIG
15	23	99	94	56	17	20	23	25	23	22	20	16	18	15	15	11	10	ENSDARG00000004037	FALSE	0.912175	COG2
11	23	116	144	63	23	27	40	49	43	33	28	26	23	16	12	12	14	ENSDARG00000004046	TRUE	0.926957	PHF6
26	34	37	48	75	156	179	136	94	71	74	75	83	86	69	36	30	23	ENSDARG00000004049	TRUE	0.605976	MARCKSA
											0.2	0.3	0.2	0.2	1	1	1	ENSDARG00000004051	TRUE	0.746238	CYP7A1B
0.5	2	18	28	13	3	3	5	5	4	5	6	5	5	6	8	9	9	ENSDARG00000004055	TRUE	0.878917	UHRF1BP1L
15	10	41	44	37	21	10	9	6	4	7	12	11	8	6	9	11	6	ENSDARG00000004059	TRUE	0.845903	GALK2
							0.7	11	19	41	64	71	52	49	95	133	180	ENSDARG00000004060	TRUE	0.827012	BHLHE40
0.5	1	3	2	0.5	0.3	0.2	0.9	2	2	4	7	8	13	19	10	11	10	ENSDARG00000004074	TRUE	1.04271	BACH2B
16	19	55	56	40	16	14	55	35	19	36	53	25	21	28	28	30	31	ENSDARG00000004078	TRUE	0.450481	ACSL4A
									1	6	21	32	31	22	12	12	18	ENSDARG00000004082	TRUE	0.612283	GJA2
19	14	32	24	31	82	79	51	20	28	44	41	46	47	42	50	50	42	ENSDARG00000004094	TRUE	0.44619	ACSBG2
					0.6	0.4	0.6	0.4	2	4	7	5	4	6	6	9	7	ENSDARG00000004105	TRUE	0.739651	TIE1
															0.2	0.5	0.3	ENSDARG00000004111	TRUE	0.458258	ESR1
0.4	1	5	4	3	8	8	10	15	10	10	7	6	7	4	2	3	3	ENSDARG00000004114	FALSE	0.645129	TTI1
27	27	56	53	60	31	12	2	3	4	7	11	14	13	13	18	15	17	ENSDARG00000004115	TRUE	0.847611	MGAT4B
58	49	33	20	5	1	1	3	5	7	6	5	3	4	4	8	5	2	ENSDARG00000004130	TRUE	1.39463	MVK
14	16	22	19	13	3	0.9	0.7	3	4	5	5	4	4	2	1	2	2	ENSDARG00000004131	FALSE	1.01634	RTTN
46	46	58	52	46	36	28	27	25	16	19	14	12	17	17	17	17	15	ENSDARG00000004132	TRUE	0.533307	USP19
					1	2	2	1	4	3	5	5	5	5	23	48	35	ENSDARG00000004141	TRUE	1.40464	ZGC:92630
					0.3	0.4	0.2			0.1	1	1	2	3	7	7	8	ENSDARG00000004150	TRUE	1.133	GRM2A
2	6	38	42	43	10	7	8	12	9	12	13	8	9	8	9	10	9	ENSDARG00000004151	TRUE	0.89066	RAB23
8	9	8	8	8	5	3	3	2	2	2	2	1	1	1	2	2	2	ENSDARG00000004154	TRUE	0.765804	ORAI1B
										0.2	0.7	0.9	2	4	6	6	6	ENSDARG00000004158	TRUE	0.796043	TMEM63C
175	141	157	167	127	125	116	119	143	102	82	58	51	48	41	42	39	34	ENSDARG00000004160	TRUE	0.499796	REEP3B
7	17	66	52	59	84	109	101	84	65	65	65	53	60	45	46	42	39	ENSDARG00000004161	TRUE	0.437802	IK
18	17	13	10	6	3	2	3	8	11	15	12	8	12	8	5	7	5	ENSDARG00000004167	TRUE	0.528207	ZGC:110366
11	18	64	108	70	72	71	63	30	54	82	107	115	103	71	38	33	25	ENSDARG00000004169	TRUE	0.512492	STMN1A
15	42	52	56	60	80	103	93	75	66	55	45	36	36	30	34	30	24	ENSDARG00000004171	FALSE	0.468068	RABAC1
68	39	115	97	65	56	60	67	108	97	112	114	100	89	80	89	77	61	ENSDARG00000004173	TRUE	0.273058	COPA
28	32	101	72	85	83	103	122	114	87	90	80	70	82	59	49	48	43	ENSDARG00000004174	FALSE	0.363154	CNOT1
3	3	6	4	2	1	0.8	0.4	2	1	2	2	2	1	1	1	1	0.9	ENSDARG00000004176	TRUE	0.735551	ULK4
50	56	74	77	54	55	49	16	1	1	3	4	5	4	6	10	15	15	ENSDARG00000004177	TRUE	0.993141	FAM169AB
3	5	8	7	6	3	2	1	4	5	6	5	5	5	5	6	6	5	ENSDARG00000004184	TRUE	0.356594	NF1B
3	3	4	2	3	1	0.6		1	0.9	1	0.8	1	2	6	31	50	70	ENSDARG00000004187	TRUE	1.90649	ZGC:122979
256	284	280	277	322	425	470	387	175	132	131	127	97	79	77	62	62	52	ENSDARG00000004189	TRUE	0.659005	CBX1A
					0.7	2	5	16	12	16	17	17	17	15	18	20	18	ENSDARG00000004196	TRUE	0.485314	TNFSF10L
											3	5	1	5	5	2	0.7	ENSDARG00000004199	TRUE	0.620776	SPAM1
		0.3						0.7	2	3	2	2	1	1	1	1	0.7	ENSDARG00000004204	TRUE	0.599829	EFHC2
46	66	75	58	15	9	5	7	14	21	25	29	35	43	40	31	32	32	ENSDARG00000004211	TRUE	0.61496	CCDC106A
			0.1	41	82	98	46	48	40	38	31	25	28	19	21	18	21	ENSDARG00000004218	TRUE	0.676014	RND1B
		0.4	0.5	0.4	0.4						0.4	0.4	0.5	2	4	6	4	ENSDARG00000004219	TRUE	1.16485	SLC6A3
0.6	0.6	0.9	1						0.4	1	3	3	3	2	4	5	5	ENSDARG00000004227	TRUE	0.739014	PDE3A
				0.6	7	2	2	24	44	56	89	137	202	77	18	15	13	ENSDARG00000004232	TRUE	1.2152	DLB
																	0.3	ENSDARG00000004243	TRUE		ASIC4B
0.1	0.1				0.3	0.6	3	13	13	15	17	15	19	19	20	20	20	ENSDARG00000004246	TRUE	0.711026	SLIT2
22	32	68	80	58	100	67	56	65	65	65	52	44	39	21	18	21	15	ENSDARG00000004251	TRUE	0.491134	DHFR
		0.9	8	124	220	143	69	28	11	7	9	6	3	2	1	0.9	0.5	ENSDARG00000004256	TRUE	1.66401	WNT11F2
	0.6	4	6	1								0.4	0.7	2	2	2	3	ENSDARG00000004260	TRUE	0.811679	CUL5B
283	306	310	301	205	115	93	103	148	157	176	203	167	144	120	120	86	46	ENSDARG00000004261	TRUE	0.475079	TMED9
		0.4			0.1				0.3	0.1	0.5	0.6	0.3	0.7	2	4	2	ENSDARG00000004262	TRUE	1.2025	CYP46A1.2
122	110	101	101	33	13	10	10	11	12	14	16	17	15	19	25	28	21	ENSDARG00000004270	TRUE	1.05309	ATL3
1	5	14	17	11	7	7	6	7	8	9	9	11	8	6	5	8	6	ENSDARG00000004274	FALSE	0.445499	ZGC:112496
26	31	62	64	58	44	47	48	67	68	66	49	44	42	29	26	21	17	ENSDARG00000004280	TRUE	0.375693	SEH1L
					3	3	4	5	4	4	2	4	7	11	19	15	12	ENSDARG00000004282	TRUE	0.750265	ZGC:77375
0.1	0.3	2	2	1	0.5	0.3	0.1	0.1	0.6	1	1	2	5	6	7	8	8	ENSDARG00000004291	TRUE	1.15329	HECW1B
							0.8	8	4	8	41	50	12	57	73	77	72	ENSDARG00000004296	TRUE	0.837756	AMBP
3	4	62	80	46	39	24	30	50	55	66	45	42	50	78	79	74	82	ENSDARG00000004297	TRUE	0.484393	IRF2BPL
	0.4	0.5					0.5	4	3	4	6	8	6	7	10	13	8	ENSDARG00000004301	TRUE	0.71203	RHOGB
	0.3	0.6	0.7	0.9	0.3			0.6	0.7	2	2	3	4	4	8	9	10	ENSDARG00000004302	TRUE	1.08269	SLC45A1
0.8	0.8	3	4	3	0.4			0.8	0.7	2	4	4	5	10	14	12	13	ENSDARG00000004305	TRUE	0.970073	VANGL1
32	37	81	74	45	5	3	5	7	6	7	7	6	7	7	10	10	8	ENSDARG00000004306	TRUE	1.22375	KLHL18
		2	2	1	4	1	0.8	8	11	14	12	12	13	17	15	13	12	ENSDARG00000004307	TRUE	0.673598	LYPD6
1	4	32	28	12	9	9	16	16	13	13	12	11	14	12	12	12	9	ENSDARG00000004308	TRUE	0.553259	FAM8A1B
52	39	51	49	24	11	8	8	10	9	17	18	22	22	23	23	18	15	ENSDARG00000004311	TRUE	0.630995	LDLRAP1A
2	2	9	6	5	1	0.9	2	8	10	15	15	17	19	16	17	19	17	ENSDARG00000004318	FALSE	0.6812	CBWD
				2									0.5		2	2	2	ENSDARG00000004322	TRUE	0.3946	USH1GA
31	23	42	47	33	15	8	4	6	8	8	8	7	8	9	11	12	15	ENSDARG00000004325	TRUE	0.801635	CASP9
				3	24	41	41	38	19	29	24	24	10	4				ENSDARG00000004328	TRUE	0.583193	SI:CH1073-284B18.2
11	11	18	17	15	14	12	6	8	7	12	14	13	14	12	14	14	13	ENSDARG00000004336	FALSE	0.250364	EXOC4
127	99	101	106	119	141	127	103	74	67	51	36	31	38	30	24	23	24	ENSDARG00000004343	FALSE	0.572869	NELFE
											0.5			23	78	42	37	ENSDARG00000004358	TRUE	0.787186	GNB3A
	0.4	0.7	0.6	0.3	2	4	8	36	36	30	27	18	17	17	22	18	16	ENSDARG00000004363	TRUE	0.841073	LHFPL6
				0.2	0.4	2	8	20	14	15	11	9	11	9	9	9	8	ENSDARG00000004372	TRUE	0.612385	FMNL3
4	2	13	9	6	0.8	0.4	0.7	5	7	10	21	22	24	16	18	19	24	ENSDARG00000004377	TRUE	0.759771	PPP1R13BA
							0.2	3	7	10	12	8	7	9	7	9	8	ENSDARG00000004378	TRUE	0.445093	YRK
								0.3	1	5	7	10	18	21	26	22	23	ENSDARG00000004386	TRUE	0.729995	SI:DKEY-153K10.9
116	98	44	37	9	5	7	5	9	19	25	16	11	9	8	8	12	9	ENSDARG00000004392	TRUE	1.28542	HDR
6	10	79	70	25	4	3	14	11	6	9	8	6	2	1	5	6	6	ENSDARG00000004396	TRUE	1.48372	B3GNT5B
1			0.5	3	7	9	15	9	7	14	15	18	31	33	52	40	27	ENSDARG00000004402	TRUE	0.852021	ELOVL6
67	72	135	156	34	12	12	7	2	1	4	10	9	3	5	2	3	2	ENSDARG00000004405	TRUE	1.58812	SNX10A
0.6	1	2	2	3	1	0.8	3	10	9	11	6	9	11	10	9	9	5	ENSDARG00000004406	TRUE	0.705007	SPRA
					0.8	3	5	11	18	22	28	32	53	76	68	60	62	ENSDARG00000004415	TRUE	0.793734	TCF7L2
290	241	101	130	167	244	246	251	214	226	158	144	138	153	119	86	61	55	ENSDARG00000004427	FALSE	0.422182	DPY30
5	1	4	11	7	4	1	1	3	2	4	4	3	1	1	1	1	2	ENSDARG00000004433	TRUE	0.846042	BTK
4	12	26	22	23	18	20	25	36	27	21	18	15	17	13	8	6	6	ENSDARG00000004436	FALSE	0.481869	CIBAR1
						0.3									2	4	3	ENSDARG00000004445	TRUE	0.678585	GRM5A
	0.8	3	3	2	1	0.4	0.4	33	13	12	7	5	4	3	4	2	1	ENSDARG00000004447	TRUE	1.4345	APLNR2
3	5	7	11	1	1	1	4	11	8	11	11	9	12	13	17	15	15	ENSDARG00000004451	TRUE	0.596335	TNFRSFA
112	110	96	92	164	314	315	323	316	275	244	210	168	206	150	113	92	77	ENSDARG00000004452	TRUE	0.478925	TARDBPL
									1	8	14	13	16	10	6	7	7	ENSDARG00000004455	TRUE	0.510231	P2RX5
0.7		2	1	0.7	2							0.7		0.8	3	4	3	ENSDARG00000004459	TRUE	0.673204	UNC119.2
665	467	356	385	384	111	52	31	35	48	44	36	36	46	31	24	16	14	ENSDARG00000004460	TRUE	1.29565	DESI2
141	113	130	123	68	21	17	22	41	52	51	57	64	79	71	73	57	38	ENSDARG00000004470	TRUE	0.552187	PRKCSH
0.7	0.5	2	3	3	1	0.8	0.9	3	2	3	4	6	9	25	20	14	13	ENSDARG00000004472	FALSE	1.17236	ATAT1
											0.8	2	2	1	2	4	3	ENSDARG00000004473	TRUE	0.523434	TBX21
16	21	75	91	77	36	21	23	20	16	15	14	13	17	15	15	13	13	ENSDARG00000004492	TRUE	0.880182	PCYT1AB
	2	2	2	0.4				3	4	7	9	10	7	11	14	12	8	ENSDARG00000004497	TRUE	0.664208	TSPAN33A
												0.5		1	2	1	1	ENSDARG00000004498	TRUE	0.49793	XKR8.1
4	6	14	10	6	1	2	3	1	1	2	3	3	5	4	6	8	8	ENSDARG00000004502	TRUE	0.721089	RCOR3
2	6	60	62	62	55	66	93	78	55	54	63	39	25	28	23	18	14	ENSDARG00000004517	FALSE	0.583227	PPAT
67	77	55	52	54	81	75	72	51	33	27	19	12	16	9	8	9	8	ENSDARG00000004525	FALSE	0.67864	ZGC:63882
2	4	10	23	10	21	14	21	73	96	76	63	51	57	44	41	38	21	ENSDARG00000004527	TRUE	0.745654	PIN4
788	690	492	449	305	89	18	5	5	2	2	3	2	0.8	0.6	1	2	2	ENSDARG00000004529	TRUE	1.6664	ZGC:173742
5	8	29	36	14	7	8	10	13	12	13	11	12	17	12	9	12	15	ENSDARG00000004537	TRUE	0.563702	KMT2A
				6	30	17	8	33	27	25	20	17	12	18	32	21	28	ENSDARG00000004539	TRUE	0.41006	PTGS2A
						0.4									0.4	1	1	ENSDARG00000004561	TRUE	0.494872	PRKCG
21	30	53	61	16	2	0.8	2	6	7	7	5	4	5	4	3	3	2	ENSDARG00000004574	FALSE	1.38252	GTF3C2
5	8	34	21	26	33	40	33	26	24	24	26	24	22	13	6	7	5	ENSDARG00000004576	TRUE	0.529008	PLK4
									2	3	3	5	9	12	22	16	16	ENSDARG00000004577	TRUE	0.729975	ZGC:194665
									1	4	6	12	18	32	39	40	36	ENSDARG00000004580	TRUE	0.763502	NMNAT2
26	33	79	86	74	40	16	14	19	16	21	22	18	18	18	22	22	16	ENSDARG00000004581	TRUE	0.749604	SEL1L
										0.8	0.5	0.3	0.6	0.8	0.7	1	2	ENSDARG00000004586	TRUE	0.615285	NTRK1
0.3	0.5	7	6	5	8	11	10	15	16	13	10	9	13	11	9	10	14	ENSDARG00000004587	TRUE	0.471955	KAT5A
	0.5	1	1	2	2	3	3	24	41	52	57	80	126	253	152	129	132	ENSDARG00000004588	TRUE	1.17599	SOX4A
				0.4						0.3	1	2	3	3	6	6	5	ENSDARG00000004592	TRUE	0.763466	GPR22A
22	34	57	54	79	78	87	69	37	25	22	22	13	15	12	10	9	8	ENSDARG00000004594	TRUE	0.74793	ZNF800A
						0.2	4	0.1	0.1	0.1	0.3	0.7	0.7	1	1	2	2	ENSDARG00000004597	TRUE	1.13848	LRRC4BA
3	8	20	14	14	14	22	26	23	19	23	28	23	24	18	16	15	11	ENSDARG00000004616	TRUE	0.367581	MTMR2
0.4	0.8	1	1	0.9	1	1	3	2	2	2	3	4	4	5	6	7	6	ENSDARG00000004618	TRUE	0.750429	STX2A
					0.4	2	4	7	6	11	24	43	65	145	167	156	162	ENSDARG00000004621	TRUE	1.14126	GPM6AB
	4	1	0.4		0.5									1	4	5	4	ENSDARG00000004627	TRUE	0.773412	PANX3
9	26	63	76	50	10	7	14	20	16	17	18	16	16	25	15	12	10	ENSDARG00000004632	TRUE	0.832979	EGLN1B
													1	0.5	1	3	4	ENSDARG00000004633	TRUE	0.798197	EPN3B
5	8	33	33	35	23	15	11	14	10	11	11	10	10	9	10	14	12	ENSDARG00000004634	TRUE	0.607779	OSBP
				0.1		0.5	2	14	16	16	15	11	10	7	9	8	7	ENSDARG00000004635	TRUE	0.627234	EPHA7
96	102	120	132	144	133	104	67	49	31	29	22	19	19	15	16	17	12	ENSDARG00000004636	TRUE	0.783732	CCDC9
	0.5	0.8	2	0.4	0.5	1	1	0.3	0.2	0.2	0.2	0.1		0.3	6	9	11	ENSDARG00000004643	TRUE	1.63354	CDHR1A
122	119	104	110	47	18	16	13	9	6	6	5	5	4	4	3	2	1	ENSDARG00000004647	FALSE	1.38605	SPICE1
											0.5	0.9	0.5	1	3	3	4	ENSDARG00000004648	TRUE	0.78439	KCTD16A
								0.3	11	32	29	36	29	48	35	33	29	ENSDARG00000004658	TRUE	0.474191	ZGC:101810
9	5	26	25	11	1	1	2	9	14	15	13	10	12	11	11	12	11	ENSDARG00000004672	TRUE	0.614997	PTK2AB
257	256	212	210	188	157	121	52	47	42	53	52	51	57	58	75	64	55	ENSDARG00000004680	TRUE	0.706968	DNAJB6A
6	8	26	23	23	28	23	10	4	4	8	16	17	11	15	30	49	29	ENSDARG00000004687	TRUE	0.638027	ACAA1
25	51	90	104	60	70	57	73	72	54	57	40	39	40	33	16	14	10	ENSDARG00000004692	TRUE	0.515721	NABP1A
					5	18	23	15	21	21	14	10	14	14	8	9	12	ENSDARG00000004695	TRUE	0.385736	SIX4A
1	1	21	20	13	5	3	8	14	10	13	15	12	11	10	10	11	7	ENSDARG00000004696	TRUE	0.545116	EEFSEC
					0.9	7	15	8	7	6	6	7	6	15	18	17	19	ENSDARG00000004697	TRUE	0.572955	RXRGB
31	38	99	92	22	23	26	28	35	33	57	68	64	67	93	109	105	112	ENSDARG00000004702	TRUE	0.539516	IRF2BP2A
24	72	127	134	154	175	157	107	81	84	70	66	55	64	60	54	50	52	ENSDARG00000004706	FALSE	0.494351	SYF2
		0.3		0.2	4	6	0.2		0.6	6	9	12	17	13	13	10	9	ENSDARG00000004712	TRUE	0.777109	TBR1B
105	343	192	224	149	266	348	284	219	200	178	148	127	119	75	43	32	13	ENSDARG00000004713	TRUE	0.585608	MAD2L1
0.2	0.4	1	0.8	0.5	0.9	2	5	18	20	30	32	36	37	37	33	32	32	ENSDARG00000004714	TRUE	0.89449	TCF12
0.3	2	4	1	3	0.8	0.4									3	5	5	ENSDARG00000004721	TRUE	0.743522	MPP5B
1	1	3	2	3	0.8	0.8		3	6	11	16	12	10	8	10	18	26	ENSDARG00000004724	TRUE	0.934064	TCEA3
2	6	65	65	60	42	22	11	30	27	37	35	29	28	26	25	26	20	ENSDARG00000004726	FALSE	0.582828	TRAPPC11
88	69	108	130	101	68	40	57	116	94	73	48	32	29	20	18	18	13	ENSDARG00000004727	FALSE	0.600417	CMSS1
462	388	539	515	671	1009	1076	931	445	339	288	279	230	278	204	120	96	71	ENSDARG00000004735	TRUE	0.691797	HNRNPUB
3	7	59	87	81	88	73	73	30	13	13	10	8	7	7	9	11	14	ENSDARG00000004745	TRUE	0.999518	LMBR1L
				1	21	28	28	12	12	12	18	18	12	27	70	69	35	ENSDARG00000004748	TRUE	0.788727	ZGC:100868
		0.8		0.8	1	2	0.5		0.4		0.1	0.2	0.3	0.4	4	6	4	ENSDARG00000004753	TRUE	1.19571	MYLKB
24	21	45	33	18	21	27	33	36	36	42	38	30	38	24	27	18	11	ENSDARG00000004754	TRUE	0.320654	HSPA4A
857	948	575	571	1278	2847	3549	4179	3277	2799	2524	2393	2618	2464	2271	1792	1629	1583	ENSDARG00000004757	TRUE	0.489984	YBX1
									0.8	2	3	3	5	2	4	3	4	ENSDARG00000004763	TRUE	0.425373	NA
2	3	4	3	3	7	7	10	19	18	17	12	10	15	15	13	17	18	ENSDARG00000004771	TRUE	0.565774	ANKRD10B
40	51	99	104	84	46	45	58	97	72	77	50	32	29	18	18	18	19	ENSDARG00000004774	TRUE	0.553437	WDR36
						0.2	0.6	8	10	14	18	19	14	12	15	15	14	ENSDARG00000004782	TRUE	0.519379	FGFR3
33	49	69	74	79	70	74	84	108	116	124	107	95	93	84	69	63	65	ENSDARG00000004785	TRUE	0.288465	COPS2
	0.3	0.7	0.8	0.4											0.7	0.9	1	ENSDARG00000004789	TRUE	0.371122	LRP1BA
0.6	1	4	4	3	1	0.3		0.4	0.5	1	2	1	1	0.9	0.7	0.8	1	ENSDARG00000004794	TRUE	0.861942	CCDC146
11	11	29	29	15	9	4	3	7	7	10	8	10	13	12	14	14	12	ENSDARG00000004796	TRUE	0.575471	MGRN1B
25	47	149	155	140	130	108	98	118	70	65	46	30	28	19	20	19	17	ENSDARG00000004806	TRUE	0.7091	GRWD1
8	21	126	144	52	8	2	0.5	0.9	0.4	0.5	0.3							ENSDARG00000004823	FALSE	1.69087	ASZ1
1	2	4	6	7	22	36	62	135	126	163	183	193	188	160	167	157	130	ENSDARG00000004830	TRUE	0.788262	FLOT2A
21	29	52	46	32	21	9	8	13	9	15	19	23	23	25	43	43	40	ENSDARG00000004836	TRUE	0.524695	DNAJC5AB
5	5	3	1	10	14	17	17	28	31	28	25	21	18	20	21	22	20	ENSDARG00000004840	TRUE	0.529219	RASSF1
51	64	90	92	16	7	12	23	29	30	42	46	37	30	28	31	35	40	ENSDARG00000004843	TRUE	0.597032	FOXP1A
42	72	112	108	38	10	5	6	5	5	6	5	5	6	5	5	5	4	ENSDARG00000004851	TRUE	1.46078	HINFP
0.5	0.4	2	2	0.3	5	6	6	6	5	5	5	5	8	22	40	28	27	ENSDARG00000004861	TRUE	1.19187	ESRRGA
27	20	2	2															ENSDARG00000004864	TRUE	0.999038	FOXR1
5	10	80	74	60	25	26	26	26	24	25	22	17	20	17	17	20	21	ENSDARG00000004866	TRUE	0.724882	MINDY1
										1	2	4	3	4	11	14	17	ENSDARG00000004869	TRUE	0.870642	PENKA
71	66	64	53	38	38	41	42	55	56	50	43	41	38	32	27	26	23	ENSDARG00000004870	TRUE	0.312679	PSEN1
										0.1				0.2	0.5	0.3	0.2	ENSDARG00000004871	TRUE	0.583298	MST1RB
0.9	2	16	13	17	16	19	15	4	6	3	2	1	0.7	1	0.9	1	1	ENSDARG00000004874	TRUE	1.0574	SPATA6L
179	164	96	88	80	38	20	6	14	22	25	20	19	19	17	16	19	20	ENSDARG00000004875	FALSE	1.09364	NA
11	8	27	29	14	8	8	15	9	3	5	5	6	5	5	5	7	6	ENSDARG00000004877	TRUE	0.752003	ROCK2B
			0.1	3	4	3	2	2	2	3	3	3	2	3	3	4	4	ENSDARG00000004880	TRUE	0.370089	ACSM3
135	94	67	80	81	35	28	19	26	26	22	19	12	17	12	15	14	16	ENSDARG00000004889	TRUE	0.895512	AGA
2	6	56	77	69	50	24	10	32	35	39	38	31	30	32	52	45	40	ENSDARG00000004891	FALSE	0.534137	PEX19
	0.6	1	2		0.7													ENSDARG00000004898	TRUE	0.595034	ZP2L2
6	5	16	17	14	6	3	0.3	1	0.5	2	11	7	2	8	17	22	29	ENSDARG00000004904	TRUE	0.890902	GYS2
64	47	195	258	168	68	50	60	106	135	165	170	126	124	73	66	59	44	ENSDARG00000004906	TRUE	0.560194	STIP1
18	23	10	16	30	29	18	3	5	7	7	6	5	6	7	8	8	8	ENSDARG00000004925	TRUE	0.706618	IMMP2L
0.1			0.1	0.5	4	7	8	6	6	10	16	14	11	12	22	25	28	ENSDARG00000004930	TRUE	0.811569	LMO7A
								0.2	0.2	1	2	3	3	1	2	2	2	ENSDARG00000004931	TRUE	0.615958	SLC8A3
								3	6	6	6	6	8	12	9	8	8	ENSDARG00000004932	TRUE	0.332561	ANOS1B
104	129	163	207	139	235	251	167	86	62	56	54	37	27	14	7	6	3	ENSDARG00000004937	TRUE	0.837926	SKP2
23	45	28	26	44	44	54	56	60	50	52	40	48	55	41	34	25	22	ENSDARG00000004939	TRUE	0.298943	MTDHB
2	1	19	24	36	91	124	166	184	179	165	146	111	92	79	88	103	138	ENSDARG00000004948	FALSE	0.624685	BCCIP
2	0.5																	ENSDARG00000004952	FALSE	0.848528	RSAD2
								1	0.3	1	0.3							ENSDARG00000004953	TRUE	0.621762	MXB
		0.2		0.6	0.3	0.4	0.2	0.5	0.3	0.2	0.2	0.3	0.3	1	1	4	3	ENSDARG00000004954	TRUE	1.35588	GRNA
106	145	181	227	254	317	282	263	184	174	145	120	111	116	101	72	60	52	ENSDARG00000004956	TRUE	0.490327	ZMAT2
0.7	0.4	0.4	0.5	0.7		0.9		1	8	33	48	31	16	1	5	19	25	ENSDARG00000004964	TRUE	1.26733	CYP4T8
0.6	5	6	7	8	3	2	7	10	3	10	13	7	2	4	4	5	3	ENSDARG00000004979	TRUE	0.591712	ELOVL5
		0.3	0.5	0.2				0.5	0.7	3	6	13	19	29	38	34	36	ENSDARG00000004988	TRUE	1.10499	PPP3CA
0.5	0.8	1	1	0.9	0.6	2	3	7	7	7	8	9	9	5	5	4	4	ENSDARG00000005002	TRUE	0.741075	BRF1B
					3	4	2	3	2	1	0.8	0.4	0.3	0.7	2	6	8	ENSDARG00000005004	TRUE	0.901399	SLC5A12
4	8	15	16	12	21	21	23	12	8	5	3	3	4	2	1	2	2	ENSDARG00000005010	TRUE	0.825343	SI:DKEYP-2E4.8
52	50	86	77	69	57	32	28	43	36	37	37	33	30	22	22	23	25	ENSDARG00000005015	TRUE	0.457858	TSPY
		0.4		0.8	3	12	38	196	246	256	190	149	132	89	55	23	12	ENSDARG00000005023	TRUE	0.999971	FKBP9
4	4	20	23	4	3	6	6	11	12	13	12	10	11	13	11	11	10	ENSDARG00000005026	TRUE	0.523654	TSHZ1
3	7	13	19	12	8	4	2	2	5	6	11	16	8	12	17	19	19	ENSDARG00000005034	FALSE	0.59233	CRPPA
40	50	75	77	17	2	1	3	3	5	4	5	7	7	8	13	13	12	ENSDARG00000005049	TRUE	1.28781	RAB20
									0.4	0.4			0.9	0.5	0.5	2	1	ENSDARG00000005050	TRUE	0.706998	WNT2BA
	1	1	1	7	42	56	57	40	27	26	13	10	9	6	7	8	8	ENSDARG00000005057	TRUE	1.01316	DIMT1L
563	492	392	286	210	138	161	117	102	77	85	92	73	62	35	17	17	10	ENSDARG00000005058	TRUE	1.01499	NCAPD2
198	176	123	118	72	35	23	17	19	21	26	24	22	26	27	29	29	24	ENSDARG00000005078	TRUE	1.02481	EIF4E3
		0.7	1	0.8	2	3	5	6	11	14	25	19	20	25	53	59	53	ENSDARG00000005085	TRUE	1.07307	GGCTB
			0.3	0.2			0.5	4	3	3	2	2	2	2	2	1	0.9	ENSDARG00000005092	FALSE	0.652443	CEP89
10	5	10	11	7	2	0.3			0.4	1	1	1	4	5	8	7	6	ENSDARG00000005095	TRUE	0.751847	GLCEA
310	335	272	257	71	43	51	49	46	49	51	45	45	46	31	12	12	6	ENSDARG00000005098	TRUE	1.1512	ZGC:86764
3	4	28	43	58	27	12	10	14	17	21	23	21	19	21	23	20	21	ENSDARG00000005104	TRUE	0.603043	LIMK2
717	669	456	416	440	389	283	110	33	33	37	59	52	29	40	41	50	46	ENSDARG00000005108	TRUE	1.0929	OCLNA
0.4	0.5	0.8	0.8	0.8	1	0.7	0.7	3	8	27	68	48	19	24	61	119	91	ENSDARG00000005112	TRUE	1.37835	CDH17
100	145	136	141	112	37	21	22	38	35	45	44	40	40	35	28	18	8	ENSDARG00000005115	TRUE	0.790436	CALUB
29	74	159	151	136	172	151	155	121	88	83	66	47	50	35	49	43	23	ENSDARG00000005122	TRUE	0.57173	ATP2A2B
1	2	6	5	3	1	2	4	8	7	7	5	5	8	5	6	6	7	ENSDARG00000005126	TRUE	0.464791	LARGE1
21	26	30	27	16	13	18	37	129	124	127	106	83	78	40	31	19	20	ENSDARG00000005128	FALSE	0.812448	RNASEH2B
4	10	33	39	40	48	62	75	99	84	87	76	64	83	49	45	33	22	ENSDARG00000005134	TRUE	0.51886	PSMD11B
					0.3	0.6	0.3		0.2	1	17	40	32	33	35	36	28	ENSDARG00000005139	TRUE	0.90893	HHATLB
										0.1	1	1	2	2	11	11	11	ENSDARG00000005141	TRUE	1.04302	CAMKVB
		2	0.9	3	0.8	0.7		4	0.7	1	1	4	3	4	3	3	3	ENSDARG00000005150	TRUE	0.574853	TBX20
3	8	18	11	7	5	3	7	0.7	0.6	1	2	1		1	1	5	4	ENSDARG00000005154	TRUE	0.99968	ASPA
				0.4	0.2	0.2	1	2	3	3	5	5	6	11	16	14	14	ENSDARG00000005159	TRUE	0.975316	CYTH3B
293	284	217	214	245	266	256	230	191	175	240	263	254	220	211	220	204	158	ENSDARG00000005162	TRUE	0.157217	TPM3
46	35	33	29	26	9	5	6	8	6	5	5	4	4	5	10	12	11	ENSDARG00000005163	TRUE	0.913059	EFR3A
119	145	65	79	157	206	148	71	53	83	46	39	43	65	51	60	65	53	ENSDARG00000005172	TRUE	0.558353	DYNLL2B
								1	0.6	7	12	10	6	7	16	9	5	ENSDARG00000005176	TRUE	0.639957	ZGC:101040
0.3	1	2	3	2	0.4	0.8	2	3	5	5	7	9	9	8	19	26	26	ENSDARG00000005179	FALSE	1.15338	DGLUCY
					2	2	3	3	2	2	1	2	2	2	1	3	2	ENSDARG00000005185	TRUE	0.308395	CPN1
12	15	13	18	8	4	5	8	14	13	15	12	14	20	23	17	15	19	ENSDARG00000005186	TRUE	0.369621	SP4
34	68	250	294	289	265	198	155	86	104	290	586	710	559	660	688	720	715	ENSDARG00000005191	TRUE	0.686425	AHCY
3	5	14	23	12	19	20	31	11	12	19	16	15	10	9	9	11	10	ENSDARG00000005210	TRUE	0.48667	CORO2A
								3	4	6	6	3	2	2	2	2	1	ENSDARG00000005216	TRUE	0.55769	MEGF6
7	10	49	53	32	11	6	3	5	7	5	5	2	3	2	3	4	4	ENSDARG00000005218	FALSE	1.35005	WRNIP1
2	2	18	31	28	21	18	5	3	6	11	22	40	28	31	45	40	38	ENSDARG00000005220	TRUE	0.666244	PDCD6
			0.4												15	25	29	ENSDARG00000005221	TRUE	0.734405	DESMB
93	166	372	449	317	230	193	259	388	336	369	364	303	236	212	199	187	136	ENSDARG00000005230	FALSE	0.370666	SSR2
1	2	0.3	0.3	1	1	1	1	9	15	11	12	11	13	13	12	12	10	ENSDARG00000005232	TRUE	0.815725	CCDC85CA
8	8	40	38	34	44	38	37	38	26	26	25	19	24	16	14	13	13	ENSDARG00000005236	TRUE	0.465694	SRCAP
41	26	81	68	28	15	16	17	11	9	10	5	8	6	7	5	6	6	ENSDARG00000005246	TRUE	1.08754	ASB3
7	10	34	27	27	39	53	65	74	70	74	97	66	35	40	41	32	18	ENSDARG00000005251	FALSE	0.551086	RPE
79	132	229	228	225	212	154	139	174	162	174	188	154	118	119	123	91	53	ENSDARG00000005254	TRUE	0.338112	KDELR2A
															0.4	0.9	1	ENSDARG00000005257	FALSE	0.419289	NA
	2	32	26	15	2	2	2	0.8		0.6	0.9	0.7	0.9	0.9	0.7	2	0.9	ENSDARG00000005271	TRUE	1.76005	ZC3H12A
21	27	22	25	13	9	12	14	12	11	13	11	9	7	6	3	3	2	ENSDARG00000005274	FALSE	0.60291	RAD52
	0.5	0.5	0.4		0.9	2	2	2	2	3	3	3	3	4	6	7	4	ENSDARG00000005284	TRUE	0.696477	FBXL15
																0.9	1	ENSDARG00000005314	TRUE	0.0744323	CALHM1
150	129	130	96	74	95	101	137	207	142	128	98	69	70	47	42	40	38	ENSDARG00000005315	TRUE	0.460718	CELF1
10	12	70	74	79	55	36	45	50	35	40	43	37	30	31	32	35	30	ENSDARG00000005318	TRUE	0.454821	STAM2
12	9	10	18	8	71	116	106	43	15	16	17	7	4	5	9	12	7	ENSDARG00000005320	TRUE	1.28441	NIPSNAP1
			0.4	0.5			0.5		0.4		0.4				1	3	3	ENSDARG00000005332	TRUE	1.00767	LIPIB
																3	3	ENSDARG00000005335	TRUE	0	SLC22A4
									0.3	0.7	2	2	3	4	11	11	10	ENSDARG00000005343	TRUE	0.916094	CCDC85AL
24	35	114	107	39	7	7	13	30	24	25	22	16	17	16	18	16	14	ENSDARG00000005350	TRUE	1.0073	DIP2BA
9	29	121	99	119	60	28	10	8	8	8	11	11	9	18	15	14	12	ENSDARG00000005355	TRUE	1.19835	LARP6A
	2	7	7	5	1	1	3	2	1	2	2	2	0.9	1	2	3	3	ENSDARG00000005356	TRUE	0.734543	TYRO3
110	117	141	141	129	97	61	55	88	94	121	161	187	203	175	195	181	140	ENSDARG00000005359	TRUE	0.334702	SUCLA2
	0.2	0.4	0.5	0.2				0.5	0.2	0.2	1	0.9	0.9	1	2	2	1	ENSDARG00000005364	TRUE	0.773134	GRIN3BA
0.1		0.5	0.1	0.5	1	0.7	0.7	4	11	15	22	18	19	21	25	24	20	ENSDARG00000005368	TRUE	0.935108	MCAMB
								0.2							1	1	1	ENSDARG00000005371	TRUE	0.5	GPRC6A
12	9	18	1	2	0.5	0.3		0.6	1	1	0.9	1	2	2	14	17	18	ENSDARG00000005372	TRUE	1.18624	CAMK4
1	1	9	11	5	3	7	10	15	18	20	20	18	23	17	16	15	12	ENSDARG00000005374	TRUE	0.555089	TUBGCP4
32	61	118	113	40	18	17	20	17	12	13	13	10	10	8	6	7	7	ENSDARG00000005382	TRUE	1.18517	PRDM9
7	9	10	7	3	0.9	0.8			0.3		0.2				0.3		0.3	ENSDARG00000005392	TRUE	1.10858	SLC5A5
0.5	2	5	4	6	2	2	0.6	0.4	0.8	2	3	4	2	3	3	5	4	ENSDARG00000005394	TRUE	0.609553	DNMT3AA
1	3	7	10	5	5	4	4	7	8	7	8	8	12	13	19	24	27	ENSDARG00000005397	TRUE	0.747119	TRIM3B
								1	1	1	2	1	1	3	3	4	4	ENSDARG00000005414	TRUE	0.612707	GRAPA
2	3	11	11	2	1	2	3	4	2	4	3	3	4	4	9	13	13	ENSDARG00000005416	TRUE	0.786946	MAP3K5
33	57	120	99	38	10	3	5	24	20	32	33	38	23	47	91	118	102	ENSDARG00000005423	TRUE	0.783637	PGAM1A
29	32	31	34	29	20	16	15	22	19	22	19	20	24	21	27	27	28	ENSDARG00000005425	TRUE	0.233323	WDFY1
9	12	62	77	23	5	3	4	8	8	10	6	6	8	7	8	8	6	ENSDARG00000005448	FALSE	1.36281	MTFMT
44	31	153	152	187	186	192	194	303	307	335	334	297	296	258	269	253	185	ENSDARG00000005451	TRUE	0.407953	GDI2
1	1	6	6	7	7	10	5	4	2	3	4	4	7	22	23	21	23	ENSDARG00000005453	TRUE	0.901617	FOXP2
705	555	117	75	41	43	71	83	127	107	107	108	93	86	58	27	27	14	ENSDARG00000005454	TRUE	1.36007	TACC3
34	34	33	34	14	6	8	14	25	27	29	25	24	27	21	16	16	17	ENSDARG00000005456	FALSE	0.396811	KATNB1
184	213	220	233	207	51	52	66	68	63	57	57	47	44	39	40	35	32	ENSDARG00000005458	TRUE	0.795895	CSNK1G2A
122	140	100	119	42	21	35	50	57	49	53	43	43	45	25	10	12	8	ENSDARG00000005462	TRUE	0.736303	KIF4
3	7	10	7	25	62	87	69	35	23	28	22	19	22	22	29	40	29	ENSDARG00000005463	TRUE	0.746692	SLC30A1A
	0.8	12		11	10	11	10	5	5	9	10	10	6	11	12	11	9	ENSDARG00000005464	TRUE	0.34974	DNASE1L1
28	32	130	140	56	20	18	32	39	42	44	36	30	31	24	30	31	28	ENSDARG00000005468	TRUE	0.781128	IRF2BP1
		2	2	0.9	0.3	0.3		1	1	5	8	5	4	4	7	8	7	ENSDARG00000005476	TRUE	0.770016	NAV3
		1	2	0.4	0.1		0.3	19	14	19	20	17	19	17	18	18	18	ENSDARG00000005479	TRUE	0.69577	TENM3
		0.5	0.5	15	29	17	10	5	5	5	6	8	8	27	26	45	55	ENSDARG00000005481	TRUE	0.979545	NFKBIAA
16	13	18	19	7	1	0.5	0.6	5	7	10	13	13	20	26	27	25	27	ENSDARG00000005482	TRUE	0.661201	RAPGEF2
									0.5	6	19	30	15	54	136	123	88	ENSDARG00000005485	TRUE	0.980432	UCMAB
6	12	10	10	5	8	13	13	20	20	20	16	16	18	18	17	14	14	ENSDARG00000005500	FALSE	0.338512	DGCR6
								10	7	8	4	3	2	1	0.6	0.6	0.6	ENSDARG00000005510	TRUE	0.944186	GDF6B
99	78	99	123	162	322	357	454	778	895	852	878	793	697	639	515	551	668	ENSDARG00000005513	TRUE	0.593818	NACA
				1	0.5	0.4				0.8	1	3	1	0.8	1	4	4	ENSDARG00000005518	TRUE	0.862978	SLC5A9
													0.5		0.9	0.5	0.5	ENSDARG00000005522	TRUE	0.333333	GALR1A
0.2	0.3	0.3	0.6	0.4	15	24	24	14	17	21	21	17	11	10	12	13	10	ENSDARG00000005525	TRUE	0.717123	ACY3.2
		0.3	0.4	0.4	0.1	0.2	0.1			1	10	31	42	51	57	55	46	ENSDARG00000005526	TRUE	1.15111	IGFN1.1
200	170	173	165	112	49	34	39	66	68	65	65	54	52	36	29	27	29	ENSDARG00000005536	TRUE	0.723186	UBR7
3	6	35	51	39	25	37	54	58	51	49	50	41	40	31	21	22	21	ENSDARG00000005540	TRUE	0.459092	XPO7
				0.8	1	1	1	21	26	36	29	25	23	28	34	29	24	ENSDARG00000005541	TRUE	0.655694	WIF1
10	22	111	112	78	19	12	9	7	5	3	3	5	3	5	3	5	5	ENSDARG00000005544	TRUE	1.57624	BTBD3A
0.8	2	30	35	22	4	3	5	10	11	11	12	9	9	9	8	8	8	ENSDARG00000005547	FALSE	0.839731	RINT1
9	9	24	21	12	5	5	8	21	21	24	21	22	31	32	21	23	23	ENSDARG00000005549	TRUE	0.451786	ZNF710B
300	320	266	250	371	473	600	590	656	460	346	290	228	269	186	106	79	56	ENSDARG00000005551	TRUE	0.539428	HNRNPH1L
		0.7	0.4	0.3				1	3	6	6	6	15	27	21	18	19	ENSDARG00000005559	TRUE	0.974777	POU4F1
5	13	99	116	104	60	42	47	115	109	130	148	152	170	237	297	237	190	ENSDARG00000005560	TRUE	0.631385	YWHAH
0.6	1	9	10	4	5	4	6	11	11	9	9	8	6	7	8	9	9	ENSDARG00000005561	TRUE	0.441527	GFM2
1	2	1	1	0.3	0.2			0.4							0.9	11	14	ENSDARG00000005565	TRUE	1.56875	ENTPD8
		0.5			0.5		0.5	2	19	37	54	49	55	21	14	13	17	ENSDARG00000005574	TRUE	0.942409	VSX2
167	185	138	139	161	161	148	113	110	101	84	75	63	71	60	58	47	42	ENSDARG00000005576	TRUE	0.433622	MPHOSPH8
	0.5		0.4	1	0.9	0.4	1			0.7	3	9	11	23	41	66	66	ENSDARG00000005578	TRUE	1.50748	UGP2A
7	8	10	9	5	0.4	0.1						0.2	1	3	2	1	2	ENSDARG00000005586	TRUE	0.961765	ZBTB20
10	13	69	75	22	21	23	24	26	25	24	19	17	23	13	7	6	6	ENSDARG00000005590	TRUE	0.805442	MTF2
			0.7				0.5	13	11	12	9	8	9	11	8	9	9	ENSDARG00000005593	FALSE	0.472285	RXRGA
4	3	4	3	2	3	2	2		0.2	0.3	1	0.8	0.8	0.7	1	1	1	ENSDARG00000005595	TRUE	0.708255	ADGB
119	91	225	180	134	66	73	76	54	42	42	43	31	29	19	13	13	10	ENSDARG00000005606	TRUE	0.859786	PAXIP1
213	198	211	186	169	91	82	87	92	92	82	61	50	59	39	39	31	22	ENSDARG00000005612	TRUE	0.64874	APH1B
											0.7	0.6		1	4	7	7	ENSDARG00000005616	TRUE	0.907811	BFB
398	344	253	281	132	68	47	34	25	19	19	13	12	17	10	4	4	2	ENSDARG00000005619	TRUE	1.39781	NEK2
44	66	147	161	69	12	6	7	8	5	6	7	7	12	10	15	15	17	ENSDARG00000005625	TRUE	1.40547	MACO1A
0.4	0.8	7	9	4	0.9				0.4	2	2	6	6	3	4	2	3	ENSDARG00000005626	TRUE	0.776806	SI:CH211-133L11.10
0.3	0.6	0.3	0.5	0.6	0.4	0.7	2	3	0.9	1	4	3	0.8	1	1	1	1	ENSDARG00000005627	TRUE	0.863685	NA
	0.2	0.2			0.6	1	0.9	10	28	45	78	75	66	34	25	22	15	ENSDARG00000005629	TRUE	1.03687	SMYD2B
32	47	67	59	26	9	9	11	11	14	10	8	7	5	4	3	3	3	ENSDARG00000005640	TRUE	1.0962	ADAT3
82	58	115	105	87	88	57	20	20	20	30	45	44	37	27	30	31	29	ENSDARG00000005643	TRUE	0.601196	GCAT
1	1	3	3	2	3	6	25	43	36	50	41	28	48	52	24	21	22	ENSDARG00000005645	TRUE	0.82815	ROBO3
								8	6	8	8	4	4	8	9	10	7	ENSDARG00000005648	TRUE	0.27623	OLFML2A
8	11	44	42	41	18	12	13	19	15	15	12	13	18	22	20	19	18	ENSDARG00000005651	TRUE	0.545031	HRASB
14	17	15	12	10	6	2	8	13	6	11	17	13	7	9	15	19	17	ENSDARG00000005652	TRUE	0.399922	MAN1A1
		2	3	1					0.1	0.4	2	2	2	2	5	6	6	ENSDARG00000005670	TRUE	0.766071	TTBK2A
4	14	49	58	13	2	0.6	1	2	3	3	3	3	3	7	11	9	9	ENSDARG00000005673	FALSE	1.49291	F3B
68	103	258	264	210	264	221	212	150	91	87	64	49	43	28	30	26	17	ENSDARG00000005675	TRUE	0.756039	SEC61A1L
7	32	68	72	24	7	17	13	8	9	11	9	9	9	9	12	15	12	ENSDARG00000005679	TRUE	1.02859	TRIP10A
0.8	2	3	4	3	2	3	4	7	6	8	6	6	7	6	10	12	7	ENSDARG00000005690	TRUE	0.545073	SLC25A23A
140	282	399	371	424	500	529	351	183	129	119	88	62	70	39	31	25	15	ENSDARG00000005699	TRUE	0.844933	DDX19
				0.3							0.6	1	1	0.9	13	24	20	ENSDARG00000005704	TRUE	1.30274	EPS8L3B
75	63	17	17	6	4	4	2	2	2	3	4	12	5	13	16	47	46	ENSDARG00000005713	TRUE	1.21501	ETHE1
								0.2		0.4		2	2	3	4	5	5	ENSDARG00000005716	TRUE	0.698252	OLFML2BA
305	329	199	163	163	114	80	86	149	135	128	86	59	59	42	38	30	33	ENSDARG00000005738	TRUE	0.712712	RPF1
								7	9	12	10	12	21	34	56	52	57	ENSDARG00000005739	TRUE	0.77237	GPM6BA
									0.4	2	7	11	13	11	14	18	26	ENSDARG00000005749	TRUE	0.691406	CAND2
0.5	1	4	3	4	3	3	13	49	48	52	49	42	40	38	42	44	42	ENSDARG00000005754	TRUE	0.799359	PTPRFB
0.8	1	3	1	0.4	0.6	1	1	2	16	28	31	17	9	6	7	6	6	ENSDARG00000005762	TRUE	1.23864	COL14A1A
16	21	90	111	135	131	114	99	99	97	76	52	31	32	19	12	16	23	ENSDARG00000005772	FALSE	0.682595	TSR2
273	316	718	627	682	449	357	273	268	291	255	224	176	218	144	117	89	72	ENSDARG00000005774	TRUE	0.628826	DDX3XB
	0.2	0.4	0.5	0.4	0.1				0.8	2	3	4	8	9	19	21	23	ENSDARG00000005775	TRUE	1.28122	SCN8AA
													1	2	88	61	51	ENSDARG00000005776	TRUE	0.940261	GUK1B
														0.7	2	0.9	2	ENSDARG00000005780	TRUE	0.498296	NPY8BR
1	2	3	4	3	2	2	0.4			0.5	1	3	6	7	3	5	4	ENSDARG00000005783	TRUE	0.652865	NCANB
18	18	33	35	21	9	2	1	0.5	0.4		2	1	1	0.9	0.4	1	0.9	ENSDARG00000005786	TRUE	1.39235	PPM1F
2	4	16	9	6	3	1	2	6	6	12	17	17	13	15	20	18	14	ENSDARG00000005789	TRUE	0.635835	ENPP1
221	239	97	118	177	334	397	530	1096	1492	1439	1308	1353	1294	1237	978	998	1102	ENSDARG00000005791	FALSE	0.648761	RPL28
84	52	44	70	28	9	4	0.7	3	4	4	4	8	9	11	15	16	15	ENSDARG00000005799	FALSE	1.17252	SMIM14
0.4	0.9	0.7	2	1								0.6	0.7	1	5	6	6	ENSDARG00000005800	TRUE	1.02857	AMPD3A
								0.4	0.4	1	2	1	0.4	0.6	0.5	2	0.8	ENSDARG00000005821	TRUE	0.680274	NCF2
14	11	16	25	15	21	21	26	24	20	20	17	15	15	13	15	17	15	ENSDARG00000005823	TRUE	0.242175	SLC39A10
46	62	334	356	385	478	462	317	244	241	206	150	99	116	64	55	50	37	ENSDARG00000005827	TRUE	0.736749	EIF2S1A
6	8	4	6	12	7	4	6	12	8	8	6	6	6	4	6	7	7	ENSDARG00000005828	TRUE	0.330104	FAIMA
5	11	24	20	6	3	2	2	3	2	4	5	6	9	11	12	12	11	ENSDARG00000005834	TRUE	0.757296	GATAD2B
30	19	120	119	80	38	15	12	25	33	68	109	118	131	160	231	187	120	ENSDARG00000005840	TRUE	0.719106	GOT2B
				1	2	2	2	2	2	2	1	1	2	2	19	18	16	ENSDARG00000005841	TRUE	1.32727	TNNI2A.2
1	2	11	23	4	7	7	3	5	8	6	9	11	9	20	39	34	36	ENSDARG00000005842	TRUE	0.927176	CD9A
		3	0.8	1						0.7	0.9	0.8						ENSDARG00000005846	TRUE	0.739745	SP5B
	0.7	0.8									0.5	0.7	1	2	11	15	17	ENSDARG00000005853	TRUE	1.27091	SLC25A6
4	7	24	25	21	7	2	0.3	2	2	4	5	5	7	8	10	11	12	ENSDARG00000005861	TRUE	0.863107	RALGAPA2
9	11	33	43	27	22	22	19	26	23	21	17	14	21	11	9	9	8	ENSDARG00000005867	TRUE	0.490823	GON4L
3	17	37	36	27	42	44	40	30	29	32	32	31	30	34	48	47	48	ENSDARG00000005870	TRUE	0.333146	MMADHCB
		0.3		0.2	0.4	0.6	2	5	3	3	3	4	5	8	8	8	9	ENSDARG00000005883	TRUE	0.781784	RFX1A
36	31	39	36	28	19	12	9	11	16	28	47	48	26	34	33	39	30	ENSDARG00000005891	TRUE	0.403003	CYB5R3
1	1	0.4	1	0.4	0.4				1	0.9	2	0.8	0.7	3	3	9	8	ENSDARG00000005894	TRUE	1.24543	SLC7A9
3	9	16	13	17	15	10	9	3	1	6	9	8	9	10	14	24	22	ENSDARG00000005897	FALSE	0.566441	DERA
0.2	0.3	5	5	30	47	43	37	27	29	26	21	21	35	26	22	20	22	ENSDARG00000005908	TRUE	0.58705	CLK4B
											0.4				1	16	25	ENSDARG00000005913	TRUE	1.13302	TGM1L3
3	7	12	14	9	15	16	22	13	7	8	7	9	8	6	3	6	5	ENSDARG00000005915	TRUE	0.526567	TCF3A
0.3		0.7	1	1	0.3			4	9	17	30	24	26	15	19	21	18	ENSDARG00000005916	TRUE	0.854759	SRPK3
3	6	13	10	8	3	2	3	9	12	14	15	19	28	36	54	77	64	ENSDARG00000005924	TRUE	1.07509	SERPINA10A
19	33	70	67	79	91	78	88	152	197	175	144	147	126	112	91	106	121	ENSDARG00000005926	TRUE	0.442534	AK2
39	36	81	69	25	16	21	38	25	18	23	24	18	16	16	19	25	26	ENSDARG00000005927	TRUE	0.608219	TBC1D17
43	43	120	126	124	110	85	82	105	74	75	73	52	46	41	38	35	28	ENSDARG00000005941	TRUE	0.461908	YES1
														0.5	0.3	0.9	0.7	ENSDARG00000005942	TRUE	0.430331	VMN2R1
	0.4	2	3	0.4					0.6			0.3		1	3	7	5	ENSDARG00000005943	TRUE	0.998542	HTRA4
186	161	174	138	168	206	285	244	227	152	146	103	85	108	67	62	52	45	ENSDARG00000005945	FALSE	0.478011	SART1
9	19	44	49	24	10	10	12	18	15	17	14	12	16	13	12	12	9	ENSDARG00000005948	TRUE	0.643893	ANKMY2A
19	28	48	39	40	22	9	7	17	19	23	20	22	21	19	27	27	22	ENSDARG00000005972	TRUE	0.427708	RIC8B
28	32	59	49	50	23	20	30	39	42	42	34	32	39	30	34	37	47	ENSDARG00000005980	TRUE	0.268827	SFSWAP
2	5	19	28	11	13	17	20	27	22	23	30	32	30	21	16	17	17	ENSDARG00000005989	TRUE	0.430001	RGL1
7	22	53	37	9	2	5	12	24	20	25	23	19	24	17	10	10	5	ENSDARG00000005993	TRUE	0.701953	PRC1B
331	342	707	547	710	261	176	147	84	65	63	55	55	71	41	15	14	10	ENSDARG00000006003	TRUE	1.13408	MYCLA
										3	16	56	89	78	62	40	29	ENSDARG00000006008	TRUE	0.643425	DCT
26	41	178	199	81	10	3	6	25	26	34	41	29	20	19	12	11	12	ENSDARG00000006010	TRUE	1.30388	BMI1A
0.9	1	4	3	4	2	1	1	1	1	1	0.8	0.7	1	0.9	0.8	2	2	ENSDARG00000006011	TRUE	0.686456	KLHL42
46	74	285	289	266	217	213	177	144	87	173	376	250	100	101	113	102	88	ENSDARG00000006019	TRUE	0.537697	TKTB
108	68	64	73	36	9	3	0.9	10	9	7	8	6	5	6	16	16	17	ENSDARG00000006025	TRUE	1.21182	TP53I11B
10	20	54	64	58	48	52	33	35	33	49	60	45	42	30	39	83	61	ENSDARG00000006029	TRUE	0.382669	LTA4H
46	36	67	60	56	35	27	15	9	6	8	11	10	9	11	40	79	84	ENSDARG00000006031	TRUE	0.77581	ABAT
81	108	188	142	137	71	79	81	63	63	55	39	34	45	33	20	17	15	ENSDARG00000006038	TRUE	0.671909	AEBP2
5	3	40	51	33	18	9	13	50	54	44	45	40	37	31	24	22	16	ENSDARG00000006040	FALSE	0.554622	CYP20A1
3	4	27	28	4	0.6	0.3	0.9	3	2	4	5	6	4	5	6	5	4	ENSDARG00000006044	TRUE	1.27663	USTA
		0.9	0.6	0.6			0.8	1	1	1	2	1	1	2	2	3	3	ENSDARG00000006052	TRUE	0.581563	MALT2
	0.1	0.4	0.1	1	8	14	19	5	5	6	8	7	4	6	6	10	10	ENSDARG00000006060	TRUE	0.778047	CRYBG1B
21	25	172	178	112	75	75	108	68	49	53	40	31	32	22	27	29	25	ENSDARG00000006062	TRUE	0.778168	AKAP1B
0.4	0.9	1	1	1	0.1			0.2	3	2	2	2	2	4	11	10	9	ENSDARG00000006065	TRUE	1.15788	ZNF385B
24	64	111	119	106	83	37	16	27	26	28	21	18	24	26	19	18	14	ENSDARG00000006074	TRUE	0.831065	UCK2A
			0.6			0.5	1	1	1	2	4	5	10	8	4	5	5	ENSDARG00000006079	TRUE	0.827884	GPR37L1A
672	559	434	378	538	729	804	659	443	393	394	359	325	334	243	161	142	123	ENSDARG00000006092	TRUE	0.469449	RAD21A
											1	2	1	2	3	5	5	ENSDARG00000006093	TRUE	0.627913	CDK15
5	8	18	16	9	6	4	8	2	1	3	4	3	3	3	3	6	6	ENSDARG00000006094	FALSE	0.762692	IGF2R
									0.3	0.2	0.2							ENSDARG00000006109	TRUE	0.247436	NA
			0.1	85	171	226	306	76	24	7	3	2	0.9	2	2	2	2	ENSDARG00000006110	TRUE	1.6055	CHRD
8	18	36	56	38	22	12	4	5	2	3	8	8	6	7	8	7	5	ENSDARG00000006112	TRUE	1.0554	MYOF
	0.3	0.8	0.4	2	9	7	8	33	39	39	36	40	71	54	52	46	44	ENSDARG00000006120	TRUE	0.804194	TBX2B
25	31	88	68	45	40	47	66	72	56	65	76	62	66	68	41	41	37	ENSDARG00000006124	TRUE	0.314545	KDM5C
516	494	302	229	126	117	146	166	86	70	67	61	50	57	55	81	83	83	ENSDARG00000006125	TRUE	0.925854	CSNK1DB
0.6	3	6	5	4	1	1	3	8	12	18	19	24	28	29	19	16	13	ENSDARG00000006128	TRUE	0.816487	CEP170AA
												3	5	8	8	13	11	ENSDARG00000006137	TRUE	0.460977	STAR
				0.2	0.9	0.7							0.3	0.4	1	1	2	ENSDARG00000006151	TRUE	0.706832	PDE11AL
3	4	4	3	1	0.5	0.4	0.4	2	2	4	4	4	3	3	4	5	5	ENSDARG00000006169	TRUE	0.525346	LRRK2
			0.6					6	5	6	4	1	2	2	2	1	1	ENSDARG00000006174	TRUE	0.747474	LRRC23
8	7	8	5	5	2	0.3	0.3				1	2	3	4	7	7	6	ENSDARG00000006181	TRUE	0.63594	HIF1AA
27	33	66	82	61	66	74	77	58	45	43	38	34	33	25	16	17	13	ENSDARG00000006192	TRUE	0.494481	GATAD2AB
87	89	43	54	30	12	13	23	33	24	30	29	23	23	23	24	25	24	ENSDARG00000006196	TRUE	0.647653	SAV1
52	59	87	77	53	120	154	253	298	223	217	165	123	132	84	80	69	53	ENSDARG00000006200	TRUE	0.592666	EIF4G1A
0.2		0.3	0.4	0.1	5	8	9	6	6	6	9	9	6	9	13	14	13	ENSDARG00000006202	TRUE	0.673976	ERBB3A
														3	7	7	8	ENSDARG00000006206	TRUE	0.354777	POU4F3
19	32	32	14	21	16	10	2	7	9	10	13	6	7	5	18	36	36	ENSDARG00000006207	TRUE	0.676525	GPX1B
					0.7		0.6	5	7	18	55	88	80	71	44	94	111	ENSDARG00000006215	TRUE	0.85032	AKR1B1.1
0.4	1	11	11	36	154	223	254	282	213	183	120	67	69	40	47	44	41	ENSDARG00000006219	TRUE	0.940206	GNL3
0.6	0.3	0.4	0.4	0.1				0.2	0.2	0.3	4	3	1	3	24	74	36	ENSDARG00000006220	TRUE	2.09359	UGT1AB;UGT1A1;UGT1A2;UGT1A7;UGT1A6;UGT1A5;UGT1A4
1109	936	644	584	640	915	1124	967	573	440	398	311	255	268	178	112	82	60	ENSDARG00000006225	TRUE	0.668594	DDX39AA
7	25	56	60	45	55	46	54	53	50	52	44	45	44	32	30	31	39	ENSDARG00000006235	TRUE	0.313418	BRMS1LA
66	74	114	106	100	54	25	5	13	15	22	25	24	28	23	32	26	23	ENSDARG00000006240	TRUE	0.794304	SLC27A1A
48	45	95	98	160	336	324	348	394	359	307	199	219	307	241	246	156	129	ENSDARG00000006242	TRUE	0.502915	PTP4A1
27	44	98	92	79	122	102	76	61	38	46	45	43	34	31	26	28	26	ENSDARG00000006251	TRUE	0.540284	ELL2
7	9	22	28	29	42	42	35	21	18	19	21	16	18	15	18	19	18	ENSDARG00000006253	TRUE	0.442186	MIER3A
27	32	191	221	107	22	8	3	5	5	7	10	15	24	32	35	33	33	ENSDARG00000006257	TRUE	1.40606	VLDLR
49	93	251	214	565	1109	1725	2224	2348	2050	2375	2022	1733	1762	949	664	550	382	ENSDARG00000006260	TRUE	0.726291	TUBA8L4
9	15	19	21	1	2	2	4	7	4	5	7	7	6	8	21	38	48	ENSDARG00000006266	TRUE	1.03541	STAT1A
18	25	66	47	14	6	6	10	14	12	17	18	14	13	9	8	10	10	ENSDARG00000006272	TRUE	0.866885	MPP5A
5	8	12	9	7	2		0.3		0.3	0.6	2	3	2	2	3	2	2	ENSDARG00000006279	TRUE	0.918227	RRAGD
38	43	136	134	86	94	75	58	27	22	28	31	30	23	26	30	35	34	ENSDARG00000006283	TRUE	0.699516	WASLB
1	3	4	2	3	1		0.5	2	2	2	2	2	2	2	2	1	2	ENSDARG00000006288	TRUE	0.425242	PRDM5
2	2	3	6	6	12	12	24	42	46	42	43	41	50	45	52	48	34	ENSDARG00000006290	FALSE	0.682985	NDUFS5
								0.5	0.5	0.8	1	1	0.8	0.8	0.8	0.8	0.5	ENSDARG00000006292	FALSE	0.253372	CFAP91
30	37	64	56	20	19	22	18	17	14	11	10	11	20	17	16	17	17	ENSDARG00000006299	TRUE	0.647406	ARHGEF7A
0.5	2	13	16	13	16	17	28	36	30	34	29	23	18	16	13	13	10	ENSDARG00000006300	FALSE	0.551002	PSMD9
3	6	21	13	7	3	4	7	5	7	15	23	14	15	17	24	24	22	ENSDARG00000006301	TRUE	0.604156	RAPH1A
1	4	5	5	2	0.3	0.1	0.8	3	4	5	5	5	5	5	8	9	10	ENSDARG00000006307	TRUE	0.658599	SHISA4
1	5	2	4	1				0.3	0.3	0.4	0.4	0.4	0.2	0.3	0.7	2	1	ENSDARG00000006308	TRUE	1.14042	PTPN18
14	22	46	42	36	35	31	26	21	13	20	35	38	24	47	63	64	46	ENSDARG00000006314	TRUE	0.431984	ITGAV
129	208	91	129	171	472	539	780	1601	2127	1937	1668	1711	1607	1516	1216	1235	1377	ENSDARG00000006316	FALSE	0.688399	RPL23A
42	52	52	46	52	47	42	23	15	14	17	17	18	19	18	22	22	21	ENSDARG00000006332	TRUE	0.497375	SNX14
64	19	56	65	52	35	48	57	61	51	45	38	31	36	28	21	21	22	ENSDARG00000006345	FALSE	0.379384	MED17
					0.8	1	13	10	8	3	1	0.4	0.6	0.7	0.2	0.1		ENSDARG00000006350	TRUE	1.38391	NKX1.2LA
11	23	44	41	41	102	87	54	24	13	15	19	15	10	11	10	9	8	ENSDARG00000006353	TRUE	0.921151	ITGA5
									2	5	7	9	10	13	20	18	14	ENSDARG00000006356	TRUE	0.544175	SLC18A3A
0.2	0.5	1	2	1	0.7	0.3	0.3	0.9	1	2	2	3	3	3	3	2	2	ENSDARG00000006368	TRUE	0.655048	CRLF1B
125	85	44	32	11	3	3	17	20	19	35	62	56	46	69	110	99	82	ENSDARG00000006370	FALSE	0.735013	ATP6V1H
															0.5	0.9		ENSDARG00000006372	TRUE	0.404061	UGT5C2
								0.1	0.1	0.5	1	1	2	4	9	13	15	ENSDARG00000006383	TRUE	1.23873	STXBP5L
228	204	150	117	103	45	28	34	26	24	23	21	16	19	14	13	17	16	ENSDARG00000006385	TRUE	1.13252	TRIOBPB
170	188	233	208	93	20	22	28	28	27	28	27	25	31	29	26	29	29	ENSDARG00000006389	TRUE	1.08064	SMAD2
47	36	120	131	116	65	53	58	101	88	79	50	35	38	23	19	13	12	ENSDARG00000006392	TRUE	0.62647	EXOSC9
312	319	252	198	249	190	158	148	145	129	119	111	91	98	66	47	37	34	ENSDARG00000006395	TRUE	0.586808	RBM25B
1	0.3	0.9	2	1	0.4	0.2	0.1		0.1	0.9	2	3	6	9	11	13	13	ENSDARG00000006396	TRUE	1.25622	NRCAMA
63	79	155	163	49	17	15	17	28	41	50	51	60	75	76	107	114	107	ENSDARG00000006397	TRUE	0.628643	LAPTM4A
661	570	433	464	523	627	603	474	445	419	411	418	365	373	339	309	243	190	ENSDARG00000006399	TRUE	0.291732	YWHAE1
322	348	301	317	334	299	229	179	134	153	129	104	92	106	78	71	69	61	ENSDARG00000006408	TRUE	0.579434	HMGB3B
				50	121	141	113	66	67	57	42	36	20	5	1	1	1	ENSDARG00000006409	TRUE	0.905034	MAPK12B
132	118	49	76	93	237	216	286	541	726	575	588	580	615	609	475	475	510	ENSDARG00000006413	TRUE	0.593444	RPL38
18	19	39	41	33	12	3	2	15	15	15	15	14	21	18	21	20	18	ENSDARG00000006420	TRUE	0.542483	ATRNL1B
5	18	19	22	9	4	6	14	9	6	9	12	11	5	7	7	10	7	ENSDARG00000006422	TRUE	0.519049	ESYT3
						2	87	388	183	335	694	318	38	69	199	865	694	ENSDARG00000006427	TRUE	0.892811	FABP2
22	34	45	45	20	28	51	76	91	70	66	42	24	22	15	12	15	15	ENSDARG00000006434	FALSE	0.622054	POLR1E
												0.4	0.3		0.7	4	3	ENSDARG00000006447	TRUE	1.01488	SLC19A3A
				0.6	3				1	2	8	17	16	35	47	36	20	ENSDARG00000006456	FALSE	0.95965	PDGFRL
		0.3	0.7	1	27	28	22	34	18	15	4	0.4	0.2	5	6	5	7	ENSDARG00000006467	TRUE	1.05656	PCDH8
					0.4	0.4				0.5	2	0.7	1	1	2	3	3	ENSDARG00000006468	TRUE	0.732312	GRAP2A
								2	1	3	3	2	0.6	2	1	1	2	ENSDARG00000006474	FALSE	0.478534	SAXO2
123	122	215	185	173	136	115	94	72	60	63	65	55	48	38	31	26	21	ENSDARG00000006477	TRUE	0.634715	DDI2
35	38	67	74	256	552	636	647	499	518	505	515	442	395	275	217	196	174	ENSDARG00000006487	TRUE	0.629561	ANP32A
	0.4	0.4	0.4	0.3	0.3	0.7	7	9	4	9	12	6	2	5	12	22	16	ENSDARG00000006491	TRUE	1.0205	AGPAT9L
7	14	36	39	21	10	8	7	8	7	9	7	9	11	11	7	6	6	ENSDARG00000006494	TRUE	0.79287	ASB7
5	3	2	3	3	2	2	4	25	32	59	100	135	163	225	247	218	202	ENSDARG00000006497	TRUE	1.16795	RTN1A
											0.6	0.4		1	3	3	2	ENSDARG00000006501	TRUE	0.702453	CYP2X10.2
36	34	19	20	6	1	0.2	2	7	3	4	5	5	4	7	8	9	10	ENSDARG00000006508	TRUE	1.05157	PIP5K1BB
	0.5	3	2	51	37	53	120	173	177	149	104	78	75	50	43	31	28	ENSDARG00000006514	TRUE	0.826159	HER6
				0.4												3	4	ENSDARG00000006522	TRUE	0.753371	OTOP2
77	105	151	134	154	162	155	119	82	65	68	63	54	54	41	32	35	33	ENSDARG00000006524	FALSE	0.529126	SUPT6H
0.2	0.2	0.2	0.3	0.3	0.3	1	9	108	70	44	13	18	12	41	59	102	105	ENSDARG00000006526	TRUE	1.227	FN1B
228	315	402	366	508	559	516	354	167	146	129	110	99	96	64	42	37	33	ENSDARG00000006527	TRUE	0.77457	BRD3A
													1	3	8	7	3	ENSDARG00000006544	TRUE	0.6742	C1QTNF6B
8	9	69	83	39	14	16	13	17	14	15	13	11	13	13	13	9	7	ENSDARG00000006545	FALSE	1.02015	RGP1
1	3	13	15	18	14	6	2	9	9	11	13	14	14	12	16	27	36	ENSDARG00000006546	TRUE	0.653623	AK4
382	309	259	240	211	70	36	42	51	58	57	51	40	32	29	28	26	17	ENSDARG00000006553	TRUE	1.07312	RRAS
4	6	39	53	64	67	66	72	54	45	45	40	41	55	48	36	28	26	ENSDARG00000006566	TRUE	0.43759	NLK1
33	33	22	25	32	33	34	25	21	21	17	10	7	10	6	10	7	4	ENSDARG00000006567	TRUE	0.557325	DUS4L
										0.6	0.8	3	3	4	5	3	4	ENSDARG00000006568	TRUE	0.525763	KCNMB2
		3	5	4	7	9	13	5	2	4	5	3	2	3	1	1	2	ENSDARG00000006577	TRUE	0.731906	NA
11415	10973	2960	2551	842	150	28	8	5	4	3	2	3	1	2	2	2	3	ENSDARG00000006580	TRUE	2.2371	CLDND
9	17	38	37	28	39	42	40	28	18	24	26	25	28	24	19	21	22	ENSDARG00000006584	TRUE	0.338591	PHF8
1	4	8	11	6	3	2	5	4	4	4	4	4	5	6	4	5	4	ENSDARG00000006585	TRUE	0.470626	ZMP:0000000529
							0.4	11	11	13	11	11	3	7	25	81	59	ENSDARG00000006588	TRUE	1.20378	ZGC:111983
0.4	0.4	0.8		1				2	1	3	8	12	19	17	23	14	10	ENSDARG00000006598	TRUE	0.989829	SGK2B
102	117	159	139	115	79	65	43	49	38	44	41	32	35	25	25	24	25	ENSDARG00000006600	TRUE	0.675269	LSM14AA
3	3	6	3	2	2	2	2	3	3	3	2	3	3	3	4	6	6	ENSDARG00000006601	TRUE	0.416022	KAZNB
			0.4	3	14	11	12	2	0.3	0.8	3	4	6	2	2	0.8	0.9	ENSDARG00000006602	TRUE	1.09268	CHRNA2A
2	9	38	35	35	30	19	14	30	20	32	32	22	15	18	20	23	23	ENSDARG00000006603	TRUE	0.42066	CSRP1A
39	33	67	63	50	11	4	3	20	20	20	14	9	9	6	7	7	5	ENSDARG00000006604	TRUE	0.951234	NECTIN3B
									0.3	1	0.7	1	3	7	9	9	9	ENSDARG00000006607	TRUE	0.89224	GPR27
79	89	151	143	136	77	51	52	50	35	42	35	35	34	29	35	30	23	ENSDARG00000006609	TRUE	0.663594	MAP2K2A
		0.5	0.6	20	35	27	29	29	10	11	7	6	4	6	14	13	10	ENSDARG00000006615	TRUE	0.784005	HNF1BA
0.3	0.7	2	1	2	4	5	5	13	15	18	16	12	17	14	14	17	16	ENSDARG00000006617	TRUE	0.707062	NAPGA
32	29	27	20	16	15	31	42	50	46	46	50	49	49	45	34	29	25	ENSDARG00000006621	TRUE	0.342347	PSPC1
33	53	125	113	77	83	97	111	98	98	101	91	77	86	63	41	34	26	ENSDARG00000006624	TRUE	0.384503	PPP2R2AB
				0.2			0.3			0.3	0.7	2	2	5	10	11	11	ENSDARG00000006636	TRUE	1.09547	SLITRK2
16	20	49	51	34	19	11	11	17	12	16	14	15	17	15	14	12	11	ENSDARG00000006639	TRUE	0.621529	LNPK
360	348	309	247	95	16	6	1		3	12	17	15	16	15	17	15	15	ENSDARG00000006640	TRUE	1.50505	EOMESA
23	33	69	77	67	56	43	48	101	86	79	56	39	44	26	25	25	26	ENSDARG00000006642	TRUE	0.467982	DRG2
6	20	52	47	59	59	77	66	55	34	31	32	27	23	18	17	11	10	ENSDARG00000006666	FALSE	0.599203	BUD13
5	9	51	57	24	9	4	6	23	33	39	32	26	25	26	25	19	16	ENSDARG00000006672	TRUE	0.629165	FAM49A
		2	1	0.8	2	4	5	4	2	4	4	4	2	2	4	5	3	ENSDARG00000006677	TRUE	0.446351	RIPK1L
	3	3	4	0.6	0.3		0.6	8	1	1	0.1		2	0.3	1	0.9	1	ENSDARG00000006678	TRUE	1.15712	PTH2RA
7	9	18	12	16	18	12	15	13	10	13	8	7	10	8	10	12	11	ENSDARG00000006683	TRUE	0.295609	ARHGEF6
1298	1261	593	713	971	1054	889	991	1443	1856	1784	1485	1629	1481	1385	1097	1090	1239	ENSDARG00000006691	TRUE	0.280273	RPL12
28	43	93	84	45	8	8	22	34	29	33	30	25	31	21	22	23	25	ENSDARG00000006712	TRUE	0.660806	WIPF2B
10	15	24	21	17	5	6	12	26	19	18	19	18	16	15	17	16	15	ENSDARG00000006719	TRUE	0.335389	SPECC1LA
				0.1	0.2	0.1	0.2	0.4	1	2	2	3	4	10	19	20	21	ENSDARG00000006747	TRUE	1.35925	TMEM178B
6	8	67	55	20	3	0.7	0.6	50	56	45	24	12	13	12	11	9	8	ENSDARG00000006754	TRUE	0.980419	MLLT3
			0.1	2			0.4	8	33	89	157	107	68	55	55	61	85	ENSDARG00000006757	TRUE	0.853695	KLHL41B
						0.9	3	11	6	9	7	9	13	12	14	12	12	ENSDARG00000006758	TRUE	0.453781	FAM234B
		2				0.4	2	0.8			3	2	2	2	10	15	19	ENSDARG00000006760	TRUE	1.20706	SLC24A3
11	17	62	76	86	71	60	49	131	123	146	156	100	83	68	73	91	88	ENSDARG00000006766	TRUE	0.470055	SND1
		0.3		0.4			0.4	12	14	14	14	19	37	29	22	23	19	ENSDARG00000006773	TRUE	0.705695	ELOVL4A
0.3	0.9	8	2	3	0.6			4	2	6	4	3	3	2	1	2	1	ENSDARG00000006775	TRUE	0.770795	CASS4
14	21	110	81	86	112	92	54	62	47	49	46	34	30	19	14	16	11	ENSDARG00000006782	TRUE	0.676743	RB1
3	11	28	25	20	6	2	4	27	28	38	37	36	27	28	40	31	26	ENSDARG00000006786	TRUE	0.544648	COPZ2
264	222	179	151	40	8	6	9	14	13	14	13	13	17	18	23	22	20	ENSDARG00000006791	TRUE	1.43214	ARNTL1A
4	9	12	11	4	1	0.3	0.5	2	2	3	3	3	3	4	9	10	8	ENSDARG00000006797	TRUE	0.771493	NT5DC1
											0.4			1	11	38	32	ENSDARG00000006811	TRUE	1.06501	SULT1ST6
117	129	120	105	92	37	36	34	28	26	28	25	21	29	26	24	25	23	ENSDARG00000006812	TRUE	0.776405	WDR26B
0.8	3	11	16	10	12	4	0.8											ENSDARG00000006816	TRUE	0.800545	GTF2F2B
44	38	49	51	49	42	45	30	18	22	58	107	82	44	21	11	13	11	ENSDARG00000006818	TRUE	0.611308	UROD
		0.3	0.3	0.5	0.3	0.3	0.8	0.2		0.8	1	2	4	9	17	15	14	ENSDARG00000006832	TRUE	1.40627	GALNT9
0.3	1	2	1	46	37	66	138	224	185	184	150	103	78	53	43	37	35	ENSDARG00000006837	TRUE	0.921662	MYCN
															0.4	2	2	ENSDARG00000006838	TRUE	0.629837	EEF1A2
1	6	28	33	27	25	17	7	1	2	7	25	38	27	36	49	59	47	ENSDARG00000006840	FALSE	0.73259	GNMT
5	8	14	11	6	0.9	0.8	0.6	2	1	1	1	0.5	1	0.3	0.6	1	1	ENSDARG00000006848	TRUE	1.31654	PARP9
	0.2	2	2	2	0.5									1	4	5	3	ENSDARG00000006849	TRUE	0.725391	ASIC2
41	57	55	56	79	65	47	55	93	102	86	59	62	84	74	43	30	29	ENSDARG00000006859	TRUE	0.335549	NKAIN1
36	38	44	51	41	22	6	1	2	3	6	10	11	13	16	28	22	17	ENSDARG00000006862	TRUE	0.775333	KIFAP3B
0.2	0.1	2	2	1	0.4	0.8	0.1	0.8	2	2	1	1	1	0.7	0.7	0.6	0.9	ENSDARG00000006863	TRUE	0.668739	CFAP65
			0.6				0.3		0.3	0.3	2	14	21	19	10	6	3	ENSDARG00000006865	TRUE	1.12819	GLRA4A
					0.6	0.5	0.5	0.8	0.4	5	6	2	1	2	10	10	9	ENSDARG00000006868	FALSE	1.04422	TRH
7	15	20	43	17	2	0.9	1	3	3	5	5	4	2	3	4	5	4	ENSDARG00000006869	TRUE	1.29477	STX17
5	9	22	23	13	3	2	0.9				0.6	0.9	0.3	0.4	0.8	1	1	ENSDARG00000006877	TRUE	1.40798	ENPP4
0.2	0.5	0.3	1	0.7	2	6	18	32	26	22	17	17	26	18	12	11	12	ENSDARG00000006878	TRUE	0.836899	PHF21AA
50	52	87	80	32	7	4	3	8	7	11	14	15	23	38	39	29	24	ENSDARG00000006889	TRUE	0.861066	MPPED2A
					0.6						0.4	1	2	3	6	5	6	ENSDARG00000006891	TRUE	0.792024	KCNS3A
	0.4			0.2				0.2		0.4	1	1	2	1	5	6	4	ENSDARG00000006892	TRUE	1.0827	MYO3B
														0.6	2	2	3	ENSDARG00000006894	TRUE	0.519251	OPRK1
										0.3	0.1	2	7	8	8	8	7	ENSDARG00000006896	TRUE	0.710352	LHX6
1	2	10	11	5	1	0.9	4	17	17	17	11	8	12	9	11	13	12	ENSDARG00000006899	TRUE	0.617028	FAR1
3	6	66	90	72	51	39	42	57	54	64	73	77	63	50	44	31	20	ENSDARG00000006900	TRUE	0.475593	IMPDH2
0.8	1	2	2	2	0.4	0.1				0.9	6	14	17	32	25	20	18	ENSDARG00000006901	TRUE	1.12836	SI:CH1073-459J12.1
							4	11	9	10	4	3	3	2	1	1	0.9	ENSDARG00000006911	TRUE	0.845961	WNT8B
20	21	77	76	15	6	6	11	17	17	18	21	22	27	26	30	31	28	ENSDARG00000006915	TRUE	0.757417	ARL8BA
	2	11	13	8	2	2	4	4	2	4	3	3	3	4	1	3	2	ENSDARG00000006916	FALSE	0.799676	NA
2	5	20	16	12	7	7	10	14	14	19	21	21	21	17	17	20	20	ENSDARG00000006921	TRUE	0.41937	LRP5
0.7	0.5	2	2	1	0.4	0.1				0.2	0.3	0.8	1	2	4	6	6	ENSDARG00000006923	TRUE	1.10195	CACNA1AB
55	33	21	21	22	17	16	17	16	13	12	11	10	14	10	7	8	7	ENSDARG00000006924	FALSE	0.663998	FBXO38
				3	20	60	124	76	43	22	4	4	2	2		0.2	0.7	ENSDARG00000006939	TRUE	1.37618	TBX16L
															2	5	4	ENSDARG00000006944	TRUE	0.416598	GDPD3B
216	178	53	40	20	19	29	39	45	46	55	60	60	61	44	33	30	19	ENSDARG00000006963	TRUE	0.907269	CSE1L
5	6	10	8	6	3	0.6	0.8	2	0.7	0.9	1	0.7	1	0.7	0.8	2	3	ENSDARG00000006978	TRUE	0.994986	ZAK
								0.7	2	2	2	1	2	0.8	1	1		ENSDARG00000006981	TRUE	0.423585	CCDC113
						0.7	1	4	7	8	10	15	27	48	35	20	20	ENSDARG00000006983	TRUE	0.890883	CELF3B
		1	1	1	3	4	5	5	8	12	16	19	17	18	19	15	14	ENSDARG00000006990	TRUE	0.710186	CRELD1
								9	34	25	19	18	10	16	11	8	6	ENSDARG00000007009	TRUE	0.561442	HOXA11B
					0.9	0.8												ENSDARG00000007018	TRUE	0.083189	MS4A17A.6
					22	73	109	93	51	35	14	0.6	0.6	2	68	96	110	ENSDARG00000007024	TRUE	0.813221	UOX
141	170	90	91	36	16	17	21	14	14	14	14	13	9	9	10	10	8	ENSDARG00000007025	TRUE	1.28108	TTC9C
2	3	6	5	7	10	22	44	121	100	80	68	58	58	57	50	40	35	ENSDARG00000007034	TRUE	0.826147	HNRPKL
						0.8	0.9	1	1	2	2	1	1		0.5	3	7	ENSDARG00000007040	FALSE	1.01301	TMIGD1
3	6	66	69	37	34	37	44	36	31	30	27	24	25	23	16	20	19	ENSDARG00000007045	TRUE	0.564475	CNOT4A
1	3	65	74	56	57	57	50	49	52	64	65	51	54	45	44	36	31	ENSDARG00000007065	FALSE	0.411775	MRPS18B
2	2	3	3	2	1	1	2	36	15	15	9	9	6	6	6	6	6	ENSDARG00000007077	TRUE	1.15607	ANKRD50L
		3	3	0.8											1	11	13	ENSDARG00000007080	TRUE	1.00231	RHCGL1
94	161	138	139	148	122	101	101	74	63	62	51	43	47	35	24	25	24	ENSDARG00000007081	TRUE	0.571531	PIAS4A
								1		0.5	0.6	1		0.5	2	10	11	ENSDARG00000007086	TRUE	1.34219	AQP10A
4	9	32	35	35	50	50	55	67	58	48	39	29	34	21	18	15	14	ENSDARG00000007092	TRUE	0.532036	XAB2
				0.6		1	2	8	20	18	32	51	64	39	6	5	3	ENSDARG00000007097	TRUE	1.09592	HER13
5	14	95	106	144	230	276	264	305	247	211	189	187	195	199	277	287	327	ENSDARG00000007098	TRUE	0.474562	ITM2BA
514	545	520	474	906	1912	2076	2100	1165	659	461	339	254	193	139	49	38	29	ENSDARG00000007099	TRUE	0.997491	GJC4B
41	43	39	32	9	2	3	9	9	9	11	12	10	7	9	10	11	10	ENSDARG00000007108	TRUE	0.865785	LIPIA
0.3	0.8	4	4	4	12	13	11	16	13	14	9	8	10	7	6	6	6	ENSDARG00000007125	FALSE	0.568506	ASB6
72	48	55	63	57	23	17	18	26	37	40	38	33	31	23	26	26	15	ENSDARG00000007127	TRUE	0.466274	ACAT2
3	6	7	7	4	2	0.6	0.5	2	1	2	2	4	3	3	5	7	8	ENSDARG00000007129	TRUE	0.645641	SLC6A16A
8	22	14	30	43	146	186	253	275	252	199	153	86	64	38	46	47	42	ENSDARG00000007130	FALSE	0.867597	MRTO4
3	5	37	37	44	51	67	75	64	50	44	41	37	37	34	28	28	27	ENSDARG00000007135	TRUE	0.472975	CNOT3A
0.2	0.6	0.6	0.6	0.8	0.5	0.1	0.7	0.9	1	1	1	1	3	3	3	4	4	ENSDARG00000007136	TRUE	0.900539	SH3BP5LB
88	169	175	139	184	199	191	151	197	195	201	167	145	190	126	114	84	57	ENSDARG00000007141	TRUE	0.288376	PSMC3
							0.4	0.7	0.2	1	4	9	13	16	23	25	27	ENSDARG00000007149	TRUE	0.972671	L1CAMA
									0.6	0.9	0.4		1	0.6	1	2	1	ENSDARG00000007151	TRUE	0.519242	KCNK2B
2	5	20	16	15	14	7	6	15	15	20	22	22	24	25	22	21	19	ENSDARG00000007169	FALSE	0.432071	ITGB1BP1
0.4	1		0.5	0.5						0.4	1	3	2	8	9	7	9	ENSDARG00000007171	TRUE	1.04308	AIG1
3	3	13	17	14	12	4	4	13	9	11	12	9	11	13	13	13	14	ENSDARG00000007172	TRUE	0.405176	PLXNA3
12	9	16	15	7	12	12	18	22	19	19	15	11	11	8	6	8	6	ENSDARG00000007175	TRUE	0.387519	RECQL
5	10	60	62	48	20	18	22	24	13	12	12	11	10	10	13	12	12	ENSDARG00000007179	TRUE	0.835331	SASH1A
98	105	71	57	32	6	2	3	8	10	12	13	13	12	12	20	27	28	ENSDARG00000007180	TRUE	1.08522	SLC30A4
3	7	32	56	18	3	2	3	8	9	12	12	12	12	12	12	10	10	ENSDARG00000007181	FALSE	0.983798	NADK2
0.1	0.7	2	2	0.9	0.3	0.4	0.8	80	123	132	106	66	33	17	13	10	10	ENSDARG00000007184	TRUE	1.39639	ZBTB16A
		2	2	2	3	4	4	4	3	6	5	5	7	6	3	4	5	ENSDARG00000007186	TRUE	0.37567	PPP1R8A
								0.1	1	2	3	4	4	4	9	10	9	ENSDARG00000007195	TRUE	0.763473	GRM2B
26	51	114	107	97	102	106	99	104	89	84	77	54	59	40	32	26	19	ENSDARG00000007196	TRUE	0.461416	RAE1
12	24	61	63	63	45	29	42	39	31	25	17	15	19	15	14	13	12	ENSDARG00000007198	TRUE	0.605297	MTA1
417	413	362	261	309	290	285	180	126	103	88	69	61	65	48	36	30	29	ENSDARG00000007204	FALSE	0.790782	NA
2	2	18	20	8	4	5	10	11	10	12	11	10	9	11	11	8	4	ENSDARG00000007207	TRUE	0.522757	CNPY2
59	83	173	168	187	241	322	353	344	303	313	252	208	190	115	102	92	73	ENSDARG00000007216	FALSE	0.49868	ABCE1
0.8	2	13	15	16	34	40	49	39	33	27	18	9	10	5	5	5	4	ENSDARG00000007217	TRUE	0.837862	WDR55
0.9	3	7	3	3	3	2	2	9	22	35	49	47	32	51	44	39	25	ENSDARG00000007219	TRUE	0.920026	ACTN1
0.9	1	2	2	2	2	0.8	0.4	3	9	17	18	16	14	8	11	13	15	ENSDARG00000007220	TRUE	0.878214	NCAM1B
14	15	24	21	24	64	97	105	78	66	66	57	48	40	29	14	13	7	ENSDARG00000007221	FALSE	0.701162	PBK
1	3	87	134	87	41	48	49	44	37	32	31	27	29	23	21	18	16	ENSDARG00000007231	TRUE	0.814687	RYK
25	39	54	44	10	8	8	11	50	61	73	55	46	37	34	41	66	82	ENSDARG00000007241	TRUE	0.543271	MYCB
4	5	25	32	31	8	7	10	12	10	12	19	17	13	19	23	34	41	ENSDARG00000007244	TRUE	0.612027	ACP2
			0.4	0.4	0.4	0.3		2	0.6	0.6	0.5	1	2	2	2	2	3	ENSDARG00000007245	TRUE	0.728322	RUNDC3AA
0.9	0.3	2	2	1	0.4	0.3	0.4		0.9	2	2	3	5	7	24	29	32	ENSDARG00000007247	TRUE	1.60822	RIC8A
21	21	77	68	37	23	12	18	18	17	19	18	16	16	18	16	14	9	ENSDARG00000007250	FALSE	0.759735	USE1
46	52	56	61	63	66	56	59	52	47	49	54	52	57	51	38	35	30	ENSDARG00000007257	TRUE	0.185411	RAB5AB
16	39	63	86	90	71	63	45	92	96	94	112	118	143	146	197	193	170	ENSDARG00000007264	TRUE	0.505629	NA
27	40	110	101	69	56	69	54	42	38	33	43	33	31	23	17	15	14	ENSDARG00000007271	TRUE	0.604553	MYNN
						0.4			1	2	12	65	108	115	182	209	226	ENSDARG00000007275	TRUE	0.974682	SI:CH211-251B21.1
															30	783	1487	ENSDARG00000007276	TRUE	0.950396	ELA3L
					1	5	26	113	76	33	14	7	11	6	4	5	2	ENSDARG00000007277	TRUE	1.45077	MYF5
130	115	78	36	21	14	18	16	20	18	22	22	19	19	14	8	7	5	ENSDARG00000007278	FALSE	1.12896	ECT2
68	128	246	282	261	177	91	40	65	55	64	63	47	42	42	48	32	27	ENSDARG00000007279	TRUE	0.850071	YIPF5
	0.6	3	3	7	21	28	39	40	52	47	38	29	38	26	24	17	14	ENSDARG00000007285	FALSE	0.636915	MRPL57
11	10	10	6	5	4	2	3	9	14	12	11	6	4	5	4	3	2	ENSDARG00000007289	TRUE	0.56544	METRNLB
147	178	209	201	207	157	107	80	104	97	139	158	190	221	228	319	313	214	ENSDARG00000007294	TRUE	0.368154	ACO2
9	26	90	94	29	4	3	4	10	13	11	9	8	11	6	14	21	19	ENSDARG00000007302	TRUE	1.26564	SH3GL3B
230	200	225	183	147	129	171	170	141	133	111	87	66	73	39	20	21	13	ENSDARG00000007315	TRUE	0.586472	TMPOA
81	162	84	101	179	561	717	1112	2292	3086	2977	2903	2881	2565	2398	2032	2102	2307	ENSDARG00000007320	TRUE	0.740925	RPL7
23	38	82	74	84	119	102	88	70	67	76	94	90	81	89	98	92	63	ENSDARG00000007323	TRUE	0.28233	CHMP4BB
				169	371	240	162	45	24	14	3	0.5	0.6	0.2	0.1	0.2	0.2	ENSDARG00000007329	TRUE	1.58678	TBX16
										0.7	2	21	24	54	51	54	54	ENSDARG00000007344	TRUE	0.721991	TCAP
				13	102	193	239	95	83	86	78	69	59	54	53	41	34	ENSDARG00000007347	TRUE	0.712865	DEGS1
6	6	5	5	5	3	1	0.9	0.8	0.1	0.2				0.1				ENSDARG00000007349	TRUE	0.89613	DMRT1
			2	2				5	4	3	2	3	3	2	3	3	4	ENSDARG00000007356	TRUE	0.317821	FGF20A
0.4		0.3	0.3	0.6	0.8	0.2			0.2				0.3	0.3	0.5	0.9	0.6	ENSDARG00000007358	TRUE	0.514656	CXCR3.1
27	33	67	56	28	56	64	79	75	67	61	50	46	49	45	39	33	20	ENSDARG00000007359	TRUE	0.347854	ZGC:56596
2	3	7	7	6	4	4	7	11	10	16	21	27	20	27	26	23	19	ENSDARG00000007362	TRUE	0.673282	SFT2D1
								2	0.3	0.8	5	3	0.7	2	6	9	5	ENSDARG00000007366	FALSE	0.830841	SI:CH73-71D17.1
2	3	21	33	25	28	37	46	27	25	30	33	26	27	25	20	19	15	ENSDARG00000007369	TRUE	0.435311	TCF7L1B
	0.1	0.3	0.3	0.3	0.5	0.3	0.5	2	2	5	11	13	7	8	5	4	3	ENSDARG00000007370	TRUE	1.09693	DYSF
					2	1	2									0.4	0.4	ENSDARG00000007371	TRUE	0.693952	SLC26A3.1
1006	913	464	476	388	455	517	469	380	362	290	275	184	155	78	68	29	19	ENSDARG00000007377	TRUE	0.753581	ODC1
	0.3	3	0.4	1	2	4	5	0.3	1	2	4	5	2	2	16	11	12	ENSDARG00000007382	TRUE	1.09366	UBTD1A
30	24	65	82	82	123	93	83	28	7	24	18	12	7	8	7	8	8	ENSDARG00000007383	TRUE	0.955028	KCNK6
25	35	242	299	288	285	313	336	498	479	543	488	395	399	286	237	215	207	ENSDARG00000007385	TRUE	0.466296	CCT7
11	21	59	65	93	162	131	109	53	32	34	29	29	24	20	14	13	11	ENSDARG00000007387	TRUE	0.888887	IRF2A
		4	5	4	1	1	2	9	14	14	15	19	20	25	25	17	14	ENSDARG00000007396	TRUE	0.699609	RND3B
4	7	11	12	8	8	6	2	0.8	0.2	0.4	0.7	0.4	0.8	0.5	1	2	2	ENSDARG00000007398	TRUE	1.05679	LRRK1
306	348	333	322	339	319	254	157	137	118	107	74	65	79	59	47	47	46	ENSDARG00000007405	FALSE	0.693571	STRAP
					0.4	2	8	3	3	6	6	7	15	17	14	12	10	ENSDARG00000007406	TRUE	0.667975	PHOX2A
				4	2	0.5			1	1	9	11	26	31	27	16	8	ENSDARG00000007407	TRUE	0.976635	BARX1
32	74	56	80	28	5	2	3	2	2	5	5	5	5	6	12	15	14	ENSDARG00000007409	TRUE	1.28792	PPIFA
								0.8	0.4	2	3	6	7	7	20	21	16	ENSDARG00000007412	TRUE	0.941784	SLC2A1B
52	72	199	164	150	69	72	90	55	42	42	41	40	52	37	21	21	22	ENSDARG00000007413	FALSE	0.74328	ARID2
15	33	103	116	60	20	10	21	9	10	11	16	17	13	13	13	12	11	ENSDARG00000007418	TRUE	1.14759	CHMP4C
									0.4	2	17	29	12	32	63	75	60	ENSDARG00000007421	TRUE	0.857604	FTCD
				0.7	0.4	0.9	0.3	1	1	2	3	4	4	5	8	9	10	ENSDARG00000007425	TRUE	0.94822	APOL1
19	18	19	16	13	8	9	11	13	10	11	7	7	8	6	6	5	3	ENSDARG00000007429	TRUE	0.467997	NDOR1
0.6	0.3	0.6	1	3	0.4		1	18	35	30	29	32	44	24	7	7	7	ENSDARG00000007430	TRUE	1.06288	PRDM12B
											0.7	1	0.9	2	4	4	4	ENSDARG00000007436	TRUE	0.665283	AVPR2AA
958	794	458	403	184	195	235	291	424	469	375	318	259	290	202	135	102	94	ENSDARG00000007438	TRUE	0.660969	UBE2IB
2	4	79	79	42	12	11	10	14	10	11	9	8	8	7	6	5	4	ENSDARG00000007443	TRUE	1.33659	FBXL18
2	3	7	6	4	2	2	6	4	3	3	3	3	3	3	3	3	3	ENSDARG00000007444	FALSE	0.407021	IFT81
44	47	72	85	30	52	57	49	52	39	37	32	27	30	28	24	25	25	ENSDARG00000007449	TRUE	0.408746	SLC25A39
5	8	16	14	11	3	1	1	6	5	8	8	7	6	4	5	6	5	ENSDARG00000007461	TRUE	0.59413	SRGAP1A
16	28	84	87	29	4	1	0.7	0.6	0.4	1	0.6	0.3	0.2	0.3	0.4	1	2	ENSDARG00000007465	TRUE	1.93128	TDRD1
73	64	60	74	29	5	1	1	3	2	5	6	8	10	6	11	17	19	ENSDARG00000007477	TRUE	1.20311	FBXO8
									0.8	1	2	4	4	10	241	138	81	ENSDARG00000007480	TRUE	1.59097	RPE65A
93	142	229	181	74	54	50	34	28	27	27	25	20	22	21	18	17	20	ENSDARG00000007485	TRUE	1.03834	EPC2
							0.5	3	0.9	0.9	3	1	0.4	1	2	4	4	ENSDARG00000007490	TRUE	0.733956	ADRB1
13	20	123	152	72	23	18	22	19	19	15	16	14	13	11	8	11	9	ENSDARG00000007494	TRUE	1.27996	ST3GAL8
4	4	11	11	9	5	7	13	21	18	21	18	19	16	15	17	16	17	ENSDARG00000007496	FALSE	0.423243	UFL1
5	6	32	19	21	35	39	43	26	26	29	30	33	34	41	35	40	42	ENSDARG00000007523	TRUE	0.375822	KMT2E
78	84	85	97	64	43	62	72	106	98	125	134	146	154	165	208	195	150	ENSDARG00000007526	FALSE	0.412367	NDUFS2
2	4	15	23	16	12	13	15	19	21	17	10	8	7	6	5	6	6	ENSDARG00000007531	TRUE	0.551343	ZCCHC9
				0.7				0.7										ENSDARG00000007534	TRUE	0	ITLN1
		0.3		0.8	0.2							0.3	1	2	20	19	23	ENSDARG00000007553	TRUE	1.3539	OPN4.1
			3	0.8	0.5	0.8	0.3	0.9	2	4	7	8	9	8	8	9	7	ENSDARG00000007560	TRUE	0.770765	SEMA3BL
	0.4	0.7	0.5	0.3	0.8	0.2	0.1								0.2	0.5	0.6	ENSDARG00000007561	TRUE	0.537629	CDH23
28	45	71	100	76	43	37	41	35	25	30	25	23	29	29	30	32	29	ENSDARG00000007566	TRUE	0.51699	APPBP2
0.4		0.5	0.3	0.4	0.8	1		0.4	0.3	0.4	29	219	562	1122	1707	1600	1954	ENSDARG00000007576	TRUE	1.59041	CRYBB1L1
					0.5	1	3	9	12	11	3	0.2				0.3		ENSDARG00000007582	TRUE	1.08957	OLFCB1
12	24	44	44	48	40	21	9	20	18	22	18	17	16	17	17	16	15	ENSDARG00000007597	FALSE	0.516653	BLOC1S4
3	2	6	0.4	0.3	0.8	1	2	4	3	3	3	3	4	4	4	7	6	ENSDARG00000007601	TRUE	0.611066	ZMYND8
97	74	42	23	6	3	3	9	12	11	16	21	20	15	19	23	29	25	ENSDARG00000007603	TRUE	0.979614	STXBP2
6	7	23	21	21	12	11	5	1	3	5	5	5	5	6	8	6	6	ENSDARG00000007614	TRUE	0.748824	WWOX
16	22	52	58	58	29	16	20	43	49	48	45	26	24	15	9	9	7	ENSDARG00000007624	FALSE	0.586144	GINS1
8	7	40	38	42	19	10	9	14	14	13	12	9	10	10	9	8	10	ENSDARG00000007630	TRUE	0.738559	MKRN2
9	8	138	158	83	12	9	9	11	12	16	16	17	17	16	16	17	26	ENSDARG00000007639	TRUE	1.38115	CNOT4B
		0.2			1	4	16	22	19	10	6	3	3	2	2	1	0.8	ENSDARG00000007641	FALSE	1.144	NA
									0.5	3	6	13	23	38	109	106	97	ENSDARG00000007654	TRUE	1.05923	NSFA
											0.7	4	7	20	15	12	11	ENSDARG00000007655	TRUE	0.662989	CRYBB1L3
5	13	27	26	8	6	7	9	6	6	6	4	4	4	3	2	2	2	ENSDARG00000007657	TRUE	0.944346	CCNH
									1	4	6	9	16	24	58	47	49	ENSDARG00000007663	TRUE	0.922788	AMPH
	0.6	3	7	3	1	0.7	0.8	5	6	9	12	11	9	7	17	32	48	ENSDARG00000007671	TRUE	1.2301	GHRB
0.4	0.8	2	1	1	2	2	4	15	14	18	14	19	27	44	67	66	67	ENSDARG00000007678	TRUE	1.19646	TTYH3B
1	3	6	8	18	17	11	8	26	61	67	69	61	62	84	181	171	137	ENSDARG00000007682	TRUE	1.03676	PPDPFA
7	20	40	50	38	24	14	11	26	23	25	20	19	21	20	21	18	19	ENSDARG00000007691	TRUE	0.448904	CUL1B
28	12	51	58	45	64	60	48	39	40	42	40	38	44	53	65	86	117	ENSDARG00000007693	TRUE	0.441658	NFKBIAB
	0.8		2	4	4	3	3	3	10	53	162	356	808	1011	1053	626	443	ENSDARG00000007697	TRUE	1.36093	FABP7A
3	56	57	49	86	221	299	388	420	494	427	434	453	350	425	342	471	757	ENSDARG00000007708	FALSE	0.633095	NSA2
									0.3	0.5	0.8	0.7	0.7	1	3	4	3	ENSDARG00000007709	TRUE	0.885599	ADAMTS8A
53	70	70	60	55	14	5	5	6	8	12	16	15	12	12	13	11	9	ENSDARG00000007711	TRUE	0.969653	RAB3IL1
		0.8	1	1	0.9	2							1	16	52	50	51	ENSDARG00000007715	TRUE	1.33914	LGSN
265	269	179	190	189	170	75	33	53	59	55	46	38	47	28	34	36	26	ENSDARG00000007720	TRUE	0.853202	SUB1B
9	19	69	63	56	15	6	4	11	11	14	11	12	14	9	11	11	13	ENSDARG00000007722	TRUE	1.0097	NUDT8
				3	10	16	42	36	27	30	38	37	29	28	31	29	32	ENSDARG00000007723	TRUE	0.395879	EFNB1
									0.3	2	3	2	3	3	4	5	5	ENSDARG00000007727	TRUE	0.498337	RGL2
32	28	42	47	17	4	3	5	7	7	9	4	6	7	5	4	5	4	ENSDARG00000007734	TRUE	1.0767	STN1
1	2	51	60	30	9	8	8	9	9	8	9	8	12	13	26	29	26	ENSDARG00000007737	TRUE	0.928472	ZYG11
										3	51	70	37	55	41	47	46	ENSDARG00000007739	TRUE	0.440302	ATP1A1A.2
5	5	8	8	4	2	2	2	2	0.9	1	2	0.7	0.9	1	1	2	2	ENSDARG00000007743	TRUE	0.841255	IL15L
4	4	29	26	35	94	139	183	215	155	127	101	54	44	22	30	32	38	ENSDARG00000007744	TRUE	0.874155	TSR1
26	63	44	52	47	59	67	75	82	76	95	96	91	92	89	128	107	66	ENSDARG00000007745	FALSE	0.333018	UQCRFS1
473	422	289	230	152	67	22	9	1	0.7	0.8	0.8	3	2	3	4	2	2	ENSDARG00000007751	TRUE	1.65867	LMNL3
									0.3	0.8	0.9	4	2	6	16	17	20	ENSDARG00000007753	TRUE	1.06595	CPNE2
12	44	86	72	75	108	131	129	110	80	91	82	62	63	48	32	23	19	ENSDARG00000007755	TRUE	0.512283	WDR61
2	9	24	18	5	2	4	8	15	18	25	30	22	23	20	22	24	23	ENSDARG00000007760	FALSE	0.549217	SPG21
227	222	150	149	34	6	5	5	10	14	16	14	13	20	19	16	15	13	ENSDARG00000007764	TRUE	1.4501	KLHDC10
						0.5									0.4	5	1	ENSDARG00000007769	TRUE	1.27481	SULT5A1
8	14	21	31	23	19	18	13	26	20	24	18	16	17	16	15	16	16	ENSDARG00000007774	TRUE	0.286628	VASH2
6	3	2	2	0.3								0.5			0.2	0.3	0.4	ENSDARG00000007783	TRUE	1.17807	BLK
8	23	67	68	56	22	11	16	53	41	47	44	35	39	36	51	42	33	ENSDARG00000007786	TRUE	0.456259	TMX2B
13	17	30	19	20	4	4	0.6	1	1	2	1	1	1	3	29	20	19	ENSDARG00000007788	TRUE	1.01379	ATP2B1B
121	124	187	165	175	182	212	187	187	186	201	197	168	171	139	142	131	111	ENSDARG00000007791	TRUE	0.183401	PPP2R1BA
13	17	9	15	195	344	339	428	306	160	203	289	224	114	126	109	136	192	ENSDARG00000007795	TRUE	0.704473	CST3
25	15	7	5	3	4	2	3	21	24	21	18	15	13	10	11	11	10	ENSDARG00000007804	TRUE	0.613909	GAS6
1	1	0.9	0.6	0.6	0.3			2	2	2	2	3	4	6	13	11	12	ENSDARG00000007807	TRUE	1.12384	CYTH3A
0.3	21	36	9	15	23	30	39	23	20	21	14	13	20	16	16	18	18	ENSDARG00000007808	TRUE	0.462465	ZDHHC16A
57	56	60	51	46	42	52	56	51	37	41	39	35	38	28	21	20	19	ENSDARG00000007812	TRUE	0.317448	SP3B
17	25	66	66	20	3	2	3	4	2	3	3	4	2	3	5	7	6	ENSDARG00000007813	TRUE	1.5154	RNPEPL1
84	92	70	66	48	66	65	57	27	19	25	31	32	41	60	89	80	72	ENSDARG00000007818	TRUE	0.407627	PALM1B
13	6	10	13	7	6	3	3	4	3	3	4	9	5	7	19	11	10	ENSDARG00000007823	TRUE	0.588797	ATF3
0.2	0.4	0.4	0.8	0.2	0.1			0.1	0.2	0.5	1	3	6	10	20	23	26	ENSDARG00000007824	TRUE	1.57303	CAMTA1B
12	18	22	27	18	12	6	2	6	10	13	25	23	18	24	40	41	40	ENSDARG00000007825	TRUE	0.592618	MAP2K1
2960	2483	1538	1443	1986	2782	3077	2316	494	276	408	1033	824	265	559	586	572	385	ENSDARG00000007836	TRUE	0.758288	CTSLA
															2	3	4	ENSDARG00000007856	TRUE	0.333333	NA
39	41	236	252	329	555	724	717	196	162	184	124	122	133	100	73	72	74	ENSDARG00000007863	TRUE	0.945012	TRA2A
124	98	125	132	126	96	84	69	69	79	86	59	66	102	93	113	107	103	ENSDARG00000007867	FALSE	0.233727	DAZAP2
3	11	21	15	22	11	10	4	6	3	7	7	7	7	5	10	12	9	ENSDARG00000007869	TRUE	0.57563	EHD3
21	25	21	28	4	3	3	4	2	3	3	3	3	2	1	2	2	0.5	ENSDARG00000007885	FALSE	1.27304	FANCL
38	49	46	40	21	11	10	14	12	10	13	11	9	10	10	9	10	7	ENSDARG00000007886	TRUE	0.772976	SLC35B2
							9	143	110	59	26	16	14	14	11	8	6	ENSDARG00000007891	TRUE	1.2381	MEOX1
5	4	25	33	20	13	11	16	31	27	28	19	11	11	7	8	7	6	ENSDARG00000007892	TRUE	0.611058	PDCD2
67	58	50	47	70	106	129	117	83	69	69	58	41	50	30	26	23	22	ENSDARG00000007901	TRUE	0.503014	CRNKL1
															0.2	3	3	ENSDARG00000007906	TRUE	0.782216	LRP2B
1	1	0.9	1	0.8	0.3			0.1	0.6	1	2	3	5	5	8	7	7	ENSDARG00000007912	TRUE	0.998473	SI:CH211-196I2.1
6	17	27	19	17	22	30	30	26	19	19	13	10	12	9	12	12	9	ENSDARG00000007916	TRUE	0.434201	XPNPEP3
72	82	106	91	87	42	17	4	29	27	32	24	14	15	10	13	13	13	ENSDARG00000007918	FALSE	0.864746	TTC27
67	107	106	81	55	50	53	56	40	36	40	34	30	29	24	23	21	22	ENSDARG00000007923	TRUE	0.551501	PTPN1
				1	0.7	0.5		5	15	17	17	16	19	20	23	19	19	ENSDARG00000007941	TRUE	0.622823	HMX4
13	22	57	59	67	41	31	43	36	31	26	18	14	16	10	8	8	9	ENSDARG00000007943	TRUE	0.663677	GABPB2A
				0.4	10	8	1	0.9	3	5	7	12	26	22	6	4	5	ENSDARG00000007944	TRUE	0.971097	LHX1B
	0.2	0.4	0.9	0.4									0.1	0.3	0.7	1	1	ENSDARG00000007950	TRUE	0.630714	ITGA11B
2	2	9	7	10	9	14	23	72	61	86	80	67	56	42	38	41	42	ENSDARG00000007955	TRUE	0.774447	IARS1
20	22	30	27	21	16	11	16	24	33	52	67	67	73	57	64	52	36	ENSDARG00000007959	TRUE	0.542564	HIBADHB
729	646	485	389	651	1095	1371	1511	1376	977	881	770	649	742	508	282	205	164	ENSDARG00000007960	TRUE	0.533541	HNRNPABA
10	19	92	92	92	112	96	107	97	113	95	97	80	69	43	29	22	13	ENSDARG00000007971	TRUE	0.522993	CKS1B
1	1		2	2	2	5	9	5	5	7	8	8	9	14	30	27	29	ENSDARG00000007975	TRUE	1.00764	FTH1B
2	2	25	30	18	7	6	10	13	10	10	8	7	10	7	8	10	12	ENSDARG00000007976	TRUE	0.659779	SI:CH211-220F16.2
				11	38	38	41	6	8	15	33	63	69	47	20	15	15	ENSDARG00000007982	TRUE	0.678013	ONECUT1
							0.4	1	0.8	2	7	6	2	8	5	7	5	ENSDARG00000007988	TRUE	0.704771	MASP2
18	18	110	155	120	125	137	121	153	161	154	149	120	142	114	92	72	55	ENSDARG00000007989	TRUE	0.398687	NEDD8
					0.4	0.5			1	3	4	4	3	3	4	3	3	ENSDARG00000007990	TRUE	0.517449	WT1B
3	9	22	22	20	23	19	19	15	12	15	19	15	18	17	13	14	13	ENSDARG00000007996	TRUE	0.313601	POU2F1B
	3	10	1	3	2	2	1					0.9	1		2	1		ENSDARG00000008010	TRUE	1.07436	FOXL2L
14	18	64	70	33	5	3	4	7	7	8	8	7	9	9	13	13	13	ENSDARG00000008014	TRUE	1.14785	NUDT17
					0.6	1	2		0.3	0.3	0.3	0.5	0.4		0.3	0.3	0.7	ENSDARG00000008019	TRUE	0.841823	MXG
70	61	85	104	76	78	104	103	74	71	58	57	54	60	49	38	39	32	ENSDARG00000008020	FALSE	0.326707	MED31
13	23	120	97	49	14	22	19	23	24	21	23	18	17	11	5	4	3	ENSDARG00000008022	TRUE	1.11106	KIF18A
86	78	87	72	11	3	2	3	2	3	6	9	10	7	9	7	10	7	ENSDARG00000008026	TRUE	1.4019	NIBAN2B
															0.1	10	14	ENSDARG00000008029	TRUE	0.890745	MEP1A.2
	0.3	1	2	1	2	2	8	58	28	85	93	98	43	73	58	63	47	ENSDARG00000008030	TRUE	0.921501	MYL9B
19	38	162	165	136	106	107	90	71	50	52	40	31	33	21	20	19	20	ENSDARG00000008032	FALSE	0.764473	SART3
0.2	0.6	1	1	1	4	5	11	14	19	27	29	38	36	21	20	19	18	ENSDARG00000008034	TRUE	0.85076	SKIB
	0.4	2	5	6	7	5	3	3	5	3	2	2	3	2	11	18	15	ENSDARG00000008035	FALSE	0.896549	NA
1257	1068	634	659	813	650	526	322	252	261	197	175	216	199	161	75	71	73	ENSDARG00000008049	TRUE	0.83804	SI:DKEY-42I9.4
				0.3	1	0.7	0.3			0.1	0.2	1	0.9	2	4	5	4	ENSDARG00000008060	TRUE	1.06333	SCARA3
11	27	44	61	41	52	54	54	54	45	39	26	16	12	11	10	8	9	ENSDARG00000008068	FALSE	0.604818	TMA16
								0.8	0.7									ENSDARG00000008075	TRUE	0.0942809	ILLR4
328	313	186	177	245	306	314	233	140	147	134	114	101	120	95	63	47	47	ENSDARG00000008097	TRUE	0.552403	SRSF9
		0.3	0.4				0.3	2	2	3	2	4	4	9	51	46	38	ENSDARG00000008100	TRUE	1.51491	SLC7A10A
58	202	171	191	213	170	120	79	83	76	64	39	35	33	22	16	12	10	ENSDARG00000008105	TRUE	0.799534	METTL2A
5	6	39	42	32	17	6	1	5	9	12	10	6	5	7	9	7	8	ENSDARG00000008107	TRUE	0.968251	SRC
11	11	86	91	47	26	26	39	48	40	42	31	23	29	21	20	19	19	ENSDARG00000008119	TRUE	0.643007	SI:CH211-195D17.2
0.7	0.6	4	6	1	0.4	0.1		0.1			0.3	0.3	0.5	0.7	4	4	4	ENSDARG00000008127	TRUE	1.1178	PCDH15B
							0.5	21	33	36	27	23	27	28	20	15	17	ENSDARG00000008131	TRUE	0.431478	SOX1B
				0.4	0.9		0.5	0.5	1	2	1	2	4	8	13	9	8	ENSDARG00000008133	TRUE	1.08335	FOXL1
					0.5		0.7	0.8	0.3	0.6		1	0.7	0.8	1	3	3	ENSDARG00000008140	TRUE	0.840723	KCNAB1A
0.8	2	5	7	10	25	37	41	26	24	23	23	15	13	8	6	7	7	ENSDARG00000008141	TRUE	0.765377	RBL1
12	31	55	55	38	32	17	10	28	28	34	34	26	25	21	21	25	20	ENSDARG00000008142	TRUE	0.429428	STXBP3
40	34	41	48	34	49	62	84	94	70	62	42	42	42	31	25	28	27	ENSDARG00000008153	TRUE	0.413445	SERINC5
80	105	126	143	88	16	8	9	53	66	67	60	55	65	48	52	43	40	ENSDARG00000008155	TRUE	0.58478	SMS
							0.3	0.3		0.2	0.5		0.5	1	2	2	1	ENSDARG00000008164	TRUE	0.811803	BTR33
								1	1	1	5	8	5	8	12	14	10	ENSDARG00000008165	TRUE	0.722513	CASPA
	0.7	0.8		0.4	2	4	12	24	16	17	19	17	11	13	11	13	6	ENSDARG00000008170	TRUE	0.705038	DBNLA
				1		2	6	68	40	31	21	12	10	4	1	2	1	ENSDARG00000008174	TRUE	1.31829	HOXB1A
71	213	220	208	195	119	42	40	36	26	29	30	26	24	18	21	22	20	ENSDARG00000008184	TRUE	1.0226	MIA3
								0.1	0.3	0.4	0.5	1	1	2	3	5	5	ENSDARG00000008186	TRUE	1.03073	SYK
97	129	301	232	347	465	668	628	310	238	244	218	184	204	156	110	88	77	ENSDARG00000008188	TRUE	0.66258	SF1
								0.6			0.6		0.7	0.6	2	2	5	ENSDARG00000008191	TRUE	0.983916	TMEFF1A
5	10	32	37	28	6	4	4	5	3	6	9	7	7	9	10	11	11	ENSDARG00000008192	TRUE	0.890104	PANK1A
11	8	41	50	27	8	3	4	11	12	14	15	14	10	10	13	16	13	ENSDARG00000008200	TRUE	0.780271	UGP2B
								0.1	0.6	0.8	1	1	2	2	2	2	2	ENSDARG00000008203	TRUE	0.540115	PAX1A
						0.1					0.3	1	3	12	21	21	26	ENSDARG00000008209	TRUE	1.02695	MYT1LA
													0.5	0.4	0.5	0.9	0.6	ENSDARG00000008212	TRUE	0.331645	KCNK13A
	0.3	3	3	5	5	8	11	20	25	21	16	16	21	18	17	17	21	ENSDARG00000008218	TRUE	0.584123	ZNF410
21	14	80	84	46	16	15	27	40	34	45	46	39	38	38	45	41	33	ENSDARG00000008224	FALSE	0.487378	VPS35
4	6	25	22	21	12	12	14	11	7	8	9	7	7	7	8	7	6	ENSDARG00000008235	FALSE	0.566678	COG5
1	4	41	57	34	20	27	46	97	95	100	91	70	72	65	56	50	38	ENSDARG00000008237	TRUE	0.569686	SARS1
1	2	10	10	6	3	3	4	4	3	2	3	2	2	2	2	3	2	ENSDARG00000008238	TRUE	0.729735	MANBA
24	37	23	21	13	5	1	3	9	10	12	8	7	6	5	6	5	6	ENSDARG00000008239	TRUE	0.832884	MOCS3
285	259	329	325	301	215	213	214	340	345	388	352	314	379	290	213	203	210	ENSDARG00000008243	TRUE	0.220693	CCT8
5	8	15	11	8	12	13	18	15	10	17	25	32	39	18	10	10	12	ENSDARG00000008247	TRUE	0.564995	VEZF1A
		0.7	0.9	0.1									0.3	0.7	0.8	1	1	ENSDARG00000008249	TRUE	0.475715	PTCHD4
29	34	306	381	294	218	197	159	105	70	73	67	62	61	54	39	43	43	ENSDARG00000008255	TRUE	0.879584	CNOT6A
					0.4	2	0.9		0.3	5	10	11	5	5	5	8	10	ENSDARG00000008263	TRUE	0.739035	MFSD4AB
0.2	0.7	5	5	4	5	7	7	4	4	3	4	3	3	6	26	40	48	ENSDARG00000008275	TRUE	1.40782	NA
94	89	99	96	64	32	45	71	85	80	70	59	53	60	49	15	11	8	ENSDARG00000008278	TRUE	0.484835	RCOR2
5	10	46	46	36	14	9	8	11	10	11	10	10	13	12	12	11	12	ENSDARG00000008279	TRUE	0.795187	MAP2K7
2	8	19	17	14	7	2	1	9	7	9	12	10	6	6	6	6	4	ENSDARG00000008287	TRUE	0.613303	FAM114A1
6	12	99	101	117	164	216	258	311	267	249	203	188	187	179	149	158	172	ENSDARG00000008292	TRUE	0.481744	EIF2S3
				2			0.5	56	22	24	26	27	21	37	37	25	19	ENSDARG00000008305	TRUE	0.603297	HAND2
									0.3	1	6	9	3	7	26	17	13	ENSDARG00000008306	TRUE	0.912895	RDH5
5	5	39	32	26	30	24	38	30	32	41	37	40	57	64	73	81	107	ENSDARG00000008310	TRUE	0.609163	IP6K2A
11	13	41	40	11	2	1	2	5	5	7	6	5	6	4	4	5	5	ENSDARG00000008322	TRUE	1.2145	AMBRA1A
0.2	0.9	0.6	0.9	2	3	3	1	3	4	3	3	3	3	4	6	9	10	ENSDARG00000008329	TRUE	0.807993	ASIC1A
			0.9	72	250	236	126	101	93	57	44	32	22	13	3	3	4	ENSDARG00000008333	TRUE	1.1413	ZNFL2A
					0.5	0.9	1	1	0.7	1	2	1	1	1	2	2	2	ENSDARG00000008336	FALSE	0.442921	NA
66	99	146	137	73	90	84	57	43	32	35	39	37	39	47	80	80	92	ENSDARG00000008363	TRUE	0.477812	MCL1B
217	186	91	79	72	101	104	89	76	61	67	68	66	74	80	64	59	56	ENSDARG00000008370	TRUE	0.48414	CSNK1DA
4	3	8	9	9	7	9	9	19	23	18	14	16	19	16	14	16	15	ENSDARG00000008372	TRUE	0.44247	SPRED2B
3	6	9	10	21	73	71	79	55	40	45	40	40	34	33	27	28	23	ENSDARG00000008377	TRUE	0.645544	EPN2
163	291	228	204	241	289	356	270	176	164	153	124	113	132	104	55	45	38	ENSDARG00000008380	TRUE	0.519958	BRD7
86	103	224	217	216	177	120	137	239	256	272	247	254	255	221	226	182	114	ENSDARG00000008383	TRUE	0.304295	ARPC1A
5	3	0.9	0.8	0.4	1	3	6	12	10	12	14	10	11	10	8	9	7	ENSDARG00000008384	TRUE	0.652717	HDAC6
0.3	0.2	0.1		0.6	1	2	4	13	16	22	25	21	26	24	37	34	27	ENSDARG00000008388	TRUE	0.877224	MMP14B
571	465	306	297	108	38	32	33	39	42	36	27	20	20	14	11	11	10	ENSDARG00000008395	FALSE	1.49245	SNUPN
2	4	11	9	13	11	13	9	7	7	6	5	5	5	3	3	3	4	ENSDARG00000008396	TRUE	0.532199	FTR24
								0.2	0.1	0.4	0.4	0.3	0.9	1	3	5	5	ENSDARG00000008398	TRUE	1.20465	CACNA1C
		0.4	0.3	6	57	99	125	15	8	18	19	10	3	6	4	7	5	ENSDARG00000008403	TRUE	1.5556	PHOSPHO1
11	16	23	30	21	11	8	4	3	10	20	41	43	41	48	96	95	98	ENSDARG00000008407	TRUE	0.920382	TSPAN7B
		0.1	0.1	0.2	0.5	1	2	3	2	4	7	6	6	7	15	16	16	ENSDARG00000008413	TRUE	1.05381	ATP11A
								0.3	0.7	0.5	1	3	4	3	4	6	6	ENSDARG00000008414	TRUE	0.763421	NA
14	11	10	4	9	17	26	22	90	88	139	140	93	68	26	13	14	9	ENSDARG00000008433	TRUE	1.04725	UNC45B
51	62	88	64	26	27	29	36	44	26	26	27	23	27	31	31	36	36	ENSDARG00000008434	TRUE	0.454754	BCL2L1
2	5	7	7	3	1	1	3	8	6	8	6	4	6	4	3	4	4	ENSDARG00000008439	FALSE	0.483409	ATXN10
193	196	213	204	109	34	38	56	89	115	136	155	117	93	68	70	67	53	ENSDARG00000008447	TRUE	0.531017	FKBP4
						0.3	0.9	4	1	0.7	1	0.9	0.9	1	2	2	2	ENSDARG00000008450	TRUE	0.710983	PCOLCE2A
361	404	237	184	59	10	4	1	1	1	0.7	1	1	0.8	1	1	0.8	0.7	ENSDARG00000008454	TRUE	1.87706	CPEB1B
		0.3						0.3		0.5	1	0.8	2	2	10	17	16	ENSDARG00000008457	TRUE	1.3461	FAAH2A
0.5	3	27	29	21	10	10	16	30	22	27	18	17	14	8	8	7	4	ENSDARG00000008461	FALSE	0.62196	ANAPC5
61	76	47	29	12	2	0.9	1	7	8	9	11	9	9	8	8	6	6	ENSDARG00000008472	TRUE	1.26302	APEX2
					0.5													ENSDARG00000008473	TRUE		ASB14A
6	22	57	56	48	19	11	13	20	19	17	12	7	7	5	5	5	5	ENSDARG00000008480	TRUE	0.929262	TRMT61A
1	6	7	4	3	2	1	3	3	2	4	2	2	3	3	3	3	4	ENSDARG00000008485	TRUE	0.491677	LRP3
0.6	0.6	4	2	2	4	9	17	12	10	8	11	14	16	11	13	13	18	ENSDARG00000008487	TRUE	0.624553	DMD
7	11	129	116	107	58	50	59	54	46	49	46	30	30	23	22	25	28	ENSDARG00000008490	FALSE	0.70789	LTV1
								0.3	0.6	0.5	0.2	0.2	0.8	0.7	9	27	21	ENSDARG00000008491	TRUE	1.64849	SI:CH211-107O10.3
140	104	52	39	22	38	32	38	33	23	31	55	34	13	17	28	27	22	ENSDARG00000008494	TRUE	0.764737	MYL6
6	14	95	105	131	188	228	269	358	328	264	195	146	132	107	120	154	231	ENSDARG00000008502	FALSE	0.565635	PNO1
2	3	29	31	17	4	0.8	0.3	3	3	4	5	5	5	7	11	12	11	ENSDARG00000008503	TRUE	1.05256	GLCCI1A
				0.6	3	1		46	56	48	53	51	46	41	25	22	18	ENSDARG00000008540	TRUE	0.661462	SOX21B
66	68	161	162	76	25	19	8	2	0.6						0.4	0.8	1	ENSDARG00000008541	TRUE	1.29179	CHIA.4
2	7	10	13	18	47	47	43	41	39	38	29	32	36	31	21	18	18	ENSDARG00000008542	FALSE	0.521878	YOD1
0.8	1	3	3	3	5	10	23	13	7	9	9	8	6	6	13	15	14	ENSDARG00000008548	TRUE	0.693394	ARHGAP12A
300	272	220	199	216	128	82	97	133	143	136	110	79	85	49	40	28	23	ENSDARG00000008551	FALSE	0.631222	POLE3
	0.3		0.4	0.6										0.4	7	15	15	ENSDARG00000008553	TRUE	1.2484	ZGC:136872
10	13	23	20	15	5	4	11	15	12	11	8	6	9	9	10	11	11	ENSDARG00000008560	FALSE	0.42449	BRAP
36	31	38	37	32	30	21	15	31	26	35	36	32	22	20	20	30	20	ENSDARG00000008568	TRUE	0.250405	SLC25A24
11	19	41	45	25	5	2	3	18	18	19	18	16	17	20	26	20	18	ENSDARG00000008573	TRUE	0.582329	FAM20B
0.8	1	4	4	1	0.2	0.2	0.4	2	1	3	3	3	4	3	4	5	4	ENSDARG00000008575	TRUE	0.658659	LYST
37	35	57	51	16	3	2	3	7	8	10	8	7	5	5	6	8	9	ENSDARG00000008592	TRUE	1.11624	MTMR8
2	3	14	15	11	3	1	0.4	0.9	1	3	3	3	3	3	4	4	3	ENSDARG00000008593	FALSE	1.01188	NBAS
3	2	87	100	69	41	61	78	80	67	88	80	72	77	66	49	56	56	ENSDARG00000008623	TRUE	0.419176	NA
				10	99	133	151	19	6	10	24	12	4	7	23	38	29	ENSDARG00000008637	FALSE	1.22331	MTTP
1	3	9	11	6	2	2	2	5	5	8	9	11	15	17	21	21	20	ENSDARG00000008639	TRUE	0.736829	KIFAP3A
1	2	4	2	3	0.9	0.8	1	7	9	10	10	15	22	32	30	26	21	ENSDARG00000008660	TRUE	0.984331	CORO1B
	0.6	5	3	2	0.3			2	1	2	2	1	1	1	2	2	2	ENSDARG00000008662	TRUE	0.635949	FIGN
								0.6								1	0.7	ENSDARG00000008674	FALSE	0.271522	CHRNB5A
36	36	75	95	102	74	47	27	41	46	51	54	59	54	52	53	52	42	ENSDARG00000008678	TRUE	0.357168	SNX3
					23	32	38	18	18	32	41	40	22	35	38	38	39	ENSDARG00000008697	TRUE	0.269465	EPAS1A
29	51	46	46	64	59	40	21	16	20	29	45	30	19	17	18	22	17	ENSDARG00000008703	TRUE	0.479641	APEH
71	140	180	213	225	283	239	227	166	167	156	148	123	132	117	105	94	90	ENSDARG00000008706	FALSE	0.366017	PAIP2B
					0.3	0.5	8	20	22	18	15	21	37	56	52	45	42	ENSDARG00000008720	TRUE	0.723026	LMO3
6	20	38	28	37	20	16	2	2	2	4	8	10	7	13	19	21	22	ENSDARG00000008723	TRUE	0.741828	PRKCBA
1	7	42	37	30	12	6	4	2	2	2	3	3	2	3	2	4	4	ENSDARG00000008727	TRUE	1.39834	RANBP3A
87	95	153	163	145	117	84	22	4	8	13	62	103	76	60	59	43	30	ENSDARG00000008732	TRUE	0.673705	ZGC:66479
58	26	15	15	7	6	7	17	25	23	30	46	40	38	49	95	75	68	ENSDARG00000008735	FALSE	0.716934	ATP6AP2
43	37	27	20	29	49	60	81	88	78	61	44	26	24	17	17	15	19	ENSDARG00000008740	FALSE	0.58313	ESF1
148	191	325	387	432	496	437	353	248	231	241	209	185	190	167	159	130	83	ENSDARG00000008748	TRUE	0.46778	UBE2NA
9	20	107	117	65	34	31	43	72	58	56	47	39	37	37	34	30	22	ENSDARG00000008757	TRUE	0.593464	ENTPD6
382	311	208	222	176	88	50	37	36	25	25	25	27	23	24	21	19	13	ENSDARG00000008765	TRUE	1.19859	TMED5
2	2	5	5	5	5	4	4	5	3	3	3	3	5	6	8	9	9	ENSDARG00000008767	TRUE	0.445767	TLE2B
								0.7	6	34	45	36	31	29	27	30	29	ENSDARG00000008772	TRUE	0.501043	CACNG1A
15	11	51	58	50	73	64	59	24	13	19	17	15	18	13	12	14	16	ENSDARG00000008784	TRUE	0.72518	PRPF4BA
25	53	96	85	94	88	72	45	85	85	113	135	152	157	163	219	219	194	ENSDARG00000008785	TRUE	0.499479	DLDH
					0.1	0.1	0.3	3	3	4	1	0.4	0.2	0.6	4	12	19	ENSDARG00000008788	TRUE	1.53697	CAMK1GB
0.5		1	0.9	1	0.6				0.5	1	1	1	3	1	3	3	7	ENSDARG00000008790	TRUE	1.01226	ACTR3B
			19	161	14	8	24	35	13	10	2	1	0.6					ENSDARG00000008796	TRUE	1.75681	HER5
1041	1108	810	753	1020	1555	1677	1649	1341	1267	1139	990	909	932	740	376	268	235	ENSDARG00000008803	TRUE	0.431188	MARCKSB
27	14	101	107	56	13	18	41	62	53	46	38	26	24	13	11	9	7	ENSDARG00000008805	FALSE	0.80624	ORC3
191	237	191	175	63	8	2	1	4	4	2	0.8	1			0.6	1	2	ENSDARG00000008807	TRUE	1.58629	BOKB
150	144	96	71	29	10	13	10	2	2	6	9	10	10	18	30	31	24	ENSDARG00000008808	TRUE	1.26654	EML2
	1		3	2	3	2	3	14	20	15	13	13	15	12	8	6	2	ENSDARG00000008811	TRUE	0.753078	CMTM3
21	48	94	91	91	87	74	67	40	14	27	60	55	32	50	67	81	72	ENSDARG00000008816	TRUE	0.424799	GLUD1A
15	17	43	44	45	44	41	41	22	15	17	10	10	14	9	8	10	10	ENSDARG00000008818	TRUE	0.64787	HSF1
				0.5	0.5		1	2	1	4	9	10	12	18	33	35	33	ENSDARG00000008829	FALSE	1.08925	CHGA
2	4	12	14	8	4	7	21	17	11	17	32	19	11	12	15	16	15	ENSDARG00000008832	TRUE	0.541604	NEU1
16	8	14	20	12	16	12	8	2	1	0.9	0.1							ENSDARG00000008835	TRUE	0.751128	SI:DKEY-46G23.5
22	22	37	48	25	10	7	11	29	37	46	44	35	26	18	18	15	8	ENSDARG00000008840	TRUE	0.520558	HMBSA
0.1		0.1	0.1	0.2	0.1				0.1	0.1	0.1	0.2	0.4	0.4	0.1	0.7	0.6	ENSDARG00000008849	TRUE	0.874315	PTPRQ
5	3	8	8	8	4	2	1	3	5	7	6	4	3	3	3	3	4	ENSDARG00000008852	FALSE	0.483325	ELP4
		3	5	2	6	12	14	7	2	3	8	6	4	6	8	13	10	ENSDARG00000008858	TRUE	0.560159	CYP7B1
489	442	535	442	50	29	21	18	14	10	10	10	7	7	8	11	14	29	ENSDARG00000008859	TRUE	1.66036	MYLIPA
0.9				2				0.5	0.9	5	11	21	40	65	40	29	23	ENSDARG00000008861	TRUE	1.03598	TFAP2E
															2	6	4	ENSDARG00000008866	TRUE	0.5	CABP4
23	24	29	34	35	33	23	25	87	91	97	97	88	79	78	91	71	52	ENSDARG00000008867	TRUE	0.510272	RAP1B
	0.6			0.7	0.2	0.3	0.4	0.7	5	12	22	23	23	17	18	22	28	ENSDARG00000008880	TRUE	0.927648	USP28
105	111	86	79	69	26	6	10	22	16	18	15	13	15	14	30	30	23	ENSDARG00000008884	TRUE	0.907795	HPRT1
4	16	9	5	1	16	37	128	140	133	101	71	57	50	34	23	11	10	ENSDARG00000008886	TRUE	1.01662	MSX1B
	0.6	1	3	2	8	16	19	7	10	11	13	11	10	9	11	10	11	ENSDARG00000008890	FALSE	0.562934	CTNS
16	22	41	39	23	3	1	0.5	1	0.9	3	4	7	5	6	10	13	16	ENSDARG00000008904	TRUE	1.06514	SMARCA2
1	6	38	42	22	3	3	4	5	3	2	3	2	3	3	4	5	8	ENSDARG00000008906	TRUE	1.40901	SI:CH211-241E1.5
		0.3	0.3					2	1	1	0.4	0.4	1	1	2	2	3	ENSDARG00000008912	TRUE	0.720374	SLC8A2A
4		2			13	8	24	34	42	41	49	42	45	43	34	31	23	ENSDARG00000008920	FALSE	0.54522	MRPL53
2	2	3	3	1	3	8	15	12	5	17	35	22	4	7	4	4	6	ENSDARG00000008931	FALSE	1.03844	RENBP
268	253	223	221	195	158	117	99	161	146	148	138	124	110	103	94	69	36	ENSDARG00000008936	FALSE	0.427712	SEC11A
13	8	6	5	3		0.6	0.7	8	7	10	4	6	5	5	6	5	3	ENSDARG00000008946	TRUE	0.554516	CCDC127B
165	249	279	213	305	307	278	203	189	165	140	113	97	106	75	62	58	59	ENSDARG00000008947	FALSE	0.512421	RTF1
								0.3	0.4				0.5					ENSDARG00000008948	TRUE	0.25	PLA2G3
62	64	112	114	121	85	47	40	58	48	45	37	37	28	21	19	13	9	ENSDARG00000008953	FALSE	0.646679	POFUT1
54	87	111	96	52	15	13	14	16	15	15	12	10	15	12	11	12	12	ENSDARG00000008966	TRUE	1.04835	TBL1XR1B
		0.3	0.4					2	2	11	88	90	36	134	101	118	80	ENSDARG00000008969	TRUE	0.932195	FGB
4	4	8	7	7	7	6	10	24	18	16	11	6	7	5	4	5	6	ENSDARG00000008976	TRUE	0.63499	MDN1
3	6	79	88	48	4	3	8	11	11	12	11	11	11	10	10	11	13	ENSDARG00000008979	TRUE	1.29964	GOLGA1
								0.3	6	28	122	239	221	236	131	91	56	ENSDARG00000008982	TRUE	0.824592	CASQ2
2	5	23	25	25	11	6	1	2	3	2	2	2	3	1	2	3	4	ENSDARG00000008983	TRUE	1.2412	SH3GLB2A
	0.2			22	25	17	20	34	30	29	35	24	22	9	6	5	3	ENSDARG00000008986	TRUE	0.614763	E2F7
49	63	185	251	189	116	127	93	97	120	110	169	120	89	95	102	64	36	ENSDARG00000009001	TRUE	0.470271	PDIA6
2	3	3	2	2	1	1	1	7	7	14	32	42	38	58	85	75	54	ENSDARG00000009014	TRUE	1.19054	COL11A1B
					0.6	2	3	7	3	6	11	6	3	16	97	134	131	ENSDARG00000009018	TRUE	1.58765	RHBG
					0.8	0.5	0.8	1	1	1	1	1	2	2	4	5	6	ENSDARG00000009020	TRUE	0.899421	CNR1
0.7	0.4	0.4						4	15	37	53	55	56	40	35	34	33	ENSDARG00000009021	TRUE	0.764729	CHRNA1
138	116	100	98	30	12	18	23	29	29	29	25	20	24	17	16	17	14	ENSDARG00000009023	TRUE	0.958659	ANKRD28B
			0.4	0.2	0.2	0.1	0.2	0.7	2	6	14	8	6	6	8	10	10	ENSDARG00000009026	TRUE	0.955892	ANK2A
44	64	108	104	99	89	62	23	15	16	19	21	18	17	17	16	19	17	ENSDARG00000009031	TRUE	0.822378	NA
			1	14	21	38	26	5	5	7	8	10	9	19	30	43	51	ENSDARG00000009040	TRUE	0.805059	SI:CH73-141C7.1
1	2	21	25	8	2	0.4	2	6	6	4	3	2	4	3	2	3	2	ENSDARG00000009046	FALSE	1.25656	NPHP1
1	4	9	8	7	5	3	1	5	4	4	4	6	5	4	5	3	3	ENSDARG00000009074	FALSE	0.465202	CBR4
										0.2	0.1	0.8	0.8	0.6	0.1	0.3	0.2	ENSDARG00000009079	FALSE	0.773425	LOC570014
															0.7	1	3	ENSDARG00000009087	TRUE	0.798085	CD74A
		2	0.7	0.5								0.4			0.8	1	2	ENSDARG00000009094	TRUE	0.636571	GATA2B
99	84	87	84	87	83	61	39	62	71	68	61	65	91	113	166	182	216	ENSDARG00000009106	TRUE	0.487575	SERINC1
43	48	36	41	34	14	5	8	7	7	10	9	9	10	8	8	7	6	ENSDARG00000009113	FALSE	0.880041	PIGC
								0.2	0.1		0.3	0.7	1	1	0.7	1	0.6	ENSDARG00000009123	TRUE	0.566947	SELE
										2	2	4	3	4	3	3	3	ENSDARG00000009131	TRUE	0.251976	SLC10A4
3	6	74	95	82	80	75	44	22	17	22	25	21	15	17	17	16	13	ENSDARG00000009133	TRUE	0.850511	MYO1EB
				0.5	5	5			1	3	6	12	13	20	22	17	13	ENSDARG00000009134	TRUE	0.754721	HLX1
28	37	77	78	77	90	87	60	70	54	56	47	36	44	27	28	33	40	ENSDARG00000009136	TRUE	0.397758	TP53BP2A
94	125	185	144	135	20	14	20	26	24	26	25	19	19	20	27	28	30	ENSDARG00000009142	TRUE	1.00762	PPP1R13BB
																19	34	ENSDARG00000009153	TRUE	0.400249	PLA2G1B
2	4	4	3	4	1		0.3				0.2	0.2		1	16	19	15	ENSDARG00000009160	TRUE	1.24125	KMO
																0.5	0.6	ENSDARG00000009161	TRUE	0.128565	FTR55
17	21	66	71	56	52	59	54	44	47	52	48	44	48	38	32	28	23	ENSDARG00000009169	TRUE	0.344376	MOB1BA
31	35	37	27	30	35	36	43	45	41	40	33	25	28	19	13	14	14	ENSDARG00000009170	FALSE	0.331411	CTR9
2	3	21	23	11	9	11	18	15	14	20	15	13	14	13	10	10	7	ENSDARG00000009178	TRUE	0.445302	ZFAND1
			0.1	0.3	0.8	0.6	0.8	3	7	13	25	34	37	47	45	39	32	ENSDARG00000009194	TRUE	0.971631	COL16A1
						1	2	12	12	25	52	75	47	50	28	22	14	ENSDARG00000009196	TRUE	0.809506	ANXA3A
69	48	182	188	91	14	2	0.9	1	2	4	8	7	7	9	14	15	15	ENSDARG00000009208	TRUE	1.57279	PRKCDA
10	11	20	23	18	12	7	7	9	8	8	6	5	7	6	8	10	10	ENSDARG00000009209	TRUE	0.49139	SLC9A6A
562	566	614	757	970	1257	1292	1349	1267	1634	1697	1850	1816	1822	1695	1245	1118	1189	ENSDARG00000009212	TRUE	0.346752	PPIAA
16	28	50	49	47	35	27	32	36	27	28	21	15	18	16	17	14	14	ENSDARG00000009214	FALSE	0.447705	MFSD13A
				2	1	0.8			0.7	2	1	0.8	2	3	11	13	12	ENSDARG00000009215	TRUE	1.17477	ZGC:112437
5	8	25	26	13	7	4	5	10	7	10	9	10	8	10	12	16	16	ENSDARG00000009217	TRUE	0.555657	TOM1L2
5	4	17	17	6	2		0.9	3	4	6	3	4	5	5	4	3	4	ENSDARG00000009218	TRUE	0.829971	MARS2
									0.4	2	5	4	5	5	6	7	4	ENSDARG00000009242	TRUE	0.471088	FEV
1	8	16	21	26	26	24	21	89	124	160	225	238	183	202	190	185	157	ENSDARG00000009250	FALSE	0.826524	ETFB
0.8	0.5	7	7	5	1	0.8	2	7	6	9	8	6	5	5	7	7	6	ENSDARG00000009252	TRUE	0.549319	NAPEPLD
25	32	29	22	21	28	42	55	56	47	57	45	37	37	35	32	26	16	ENSDARG00000009253	FALSE	0.348599	RTRAF
0.2	0.7	1	1	1	7	6	4	0.3	0.5	1	2	2	2	3	5	6	5	ENSDARG00000009262	TRUE	0.85104	SI:DKEY-97M3.1
27	33	72	68	14	5	5	5	8	7	8	6	6	7	5	8	7	3	ENSDARG00000009266	TRUE	1.2894	UEVLD
0.6	1	8	8	8	3	1	1	6	5	8	18	16	10	15	13	14	9	ENSDARG00000009267	TRUE	0.68763	ZGC:136439
20	25	110	137	139	156	177	161	91	74	67	65	58	60	43	23	22	19	ENSDARG00000009273	TRUE	0.668776	PPM1DA
								0.5	3	10	38	135	205	325	305	272	320	ENSDARG00000009280	TRUE	0.867922	SMYD1A
					0.1		0.1	0.4	0.4	0.9	1	2	4	9	21	22	23	ENSDARG00000009281	TRUE	1.34348	DNM1B
101	133	91	103	142	253	311	394	655	849	802	728	701	663	600	477	508	556	ENSDARG00000009285	FALSE	0.586932	RPL15
9	16	17	18	9	1	0.4	0.3	2	2	6	6	10	13	12	21	23	24	ENSDARG00000009299	TRUE	0.753499	DUSP8A
4	2	13	11	12	16	10	2			0.7	2	3	4	10	99	97	80	ENSDARG00000009311	TRUE	1.52379	PVALB6
2	2	4	2	2	4	2	2	9	7	7	12	12	9	10	7	8	6	ENSDARG00000009313	TRUE	0.60095	NAPSA
24	40	55	43	44	25	18	17	38	36	46	41	40	51	40	35	31	28	ENSDARG00000009315	TRUE	0.29302	CLGN
171	287	416	408	450	564	493	306	120	91	87	66	49	54	59	49	49	50	ENSDARG00000009336	FALSE	0.874446	AIF1L
								0.3	0.5	3	9	23	21	21	26	30	30	ENSDARG00000009341	TRUE	0.732119	NRAP
128	119	194	187	194	120	52	34	115	142	177	174	148	150	103	83	66	37	ENSDARG00000009342	TRUE	0.426325	TXNDC5
84	90	78	65	78	104	137	157	112	85	91	81	70	77	52	35	28	22	ENSDARG00000009346	TRUE	0.429713	CAPRIN1A
19	28	73	66	18	20	24	34	46	42	49	87	83	49	52	50	44	36	ENSDARG00000009350	FALSE	0.461266	ATG3
		1								0.4	1	3	5	5	7	11	18	ENSDARG00000009351	TRUE	1.00129	FGF6A
0.9	0.9	0.5	3		0.5	0.8	0.9			0.4	0.3		0.4			1	1	ENSDARG00000009361	FALSE	0.808944	NA
															1	1		ENSDARG00000009372	TRUE	0	DIRAS1B
0.5	0.4	0.4	0.5				0.5								4	4	2	ENSDARG00000009386	TRUE	1.04756	NA
7	5	4	5	5	2	1	0.5	8	29	41	27	30	35	23	12	11	11	ENSDARG00000009387	TRUE	0.907844	ROBO4
	1	0.6		0.5		2	13	21	17	26	28	17	11	13	15	12	13	ENSDARG00000009390	TRUE	0.690598	NPL
0.3	0.3	0.4	0.5						0.8	7	22	28	17	30	42	27	16	ENSDARG00000009401	TRUE	0.969254	VCANB
				0.9	2	3	2	2	0.6	0.8	0.7	0.2	0.7	0.5	0.9	1	2	ENSDARG00000009402	TRUE	0.654832	SI:CH211-210B2.2
		0.6		0.4	0.8	0.5	0.9	3	7	14	21	18	16	18	30	30	29	ENSDARG00000009418	TRUE	0.912786	MEF2CB
				0.2	0.6	0.6	0.8	1	1	1	2	2	2	2	9	13	11	ENSDARG00000009430	TRUE	1.29915	TMEM30C
2	9	87	94	89	38	47	57	49	41	39	38	33	35	31	22	27	27	ENSDARG00000009436	TRUE	0.600278	UBXN7
								8	100	175	88	15	9	21	19	21	20	ENSDARG00000009438	TRUE	1.16601	MYOG
																10	7	ENSDARG00000009443	TRUE	0.249567	ZGC:92137
34	90	93	138	130	199	177	248	366	398	451	525	590	597	709	944	931	884	ENSDARG00000009447	TRUE	0.730326	ATP5MC3B
	0.7	1	1	0.4		0.4	1	0.8	1	2	0.7	0.4	0.4	0.7	2	3	3	ENSDARG00000009459	TRUE	0.752627	SLC35E4
										0.3		0.4			3	4	3	ENSDARG00000009466	TRUE	0.787213	RGS9BP
0.3	0.9		0.5	0.3	0.3	0.3	3	3	1	2	3	2	0.7	2	3	3	3	ENSDARG00000009470	TRUE	0.701163	HNF1A
						0.8	3	0.8										ENSDARG00000009471	TRUE	0.828372	NID2B
37	37	16	7	1	1	2	5	7	8	8	7	8	9	9	9	7	7	ENSDARG00000009472	TRUE	1.00218	MED19B
0.9	5	9	12	6	7	10	11	17	16	19	20	15	17	17	18	15	14	ENSDARG00000009473	TRUE	0.426454	PPARDB
					0.9	0.5	0.4	0.9	0.8	0.9	0.4		0.4	3	9	7	7	ENSDARG00000009477	TRUE	1.22001	PRKAR2AB
12	10	27	22	25	12	14	15	29	33	33	27	31	42	53	55	49	42	ENSDARG00000009480	TRUE	0.483221	PDCL
												0.6	1	2				ENSDARG00000009482	TRUE	0.600925	SLC38A8A
77	104	80	101	117	182	185	170	159	140	136	105	95	92	70	60	48	33	ENSDARG00000009484	TRUE	0.417686	ARF1
51	62	88	73	29	29	25	24	19	17	18	16	13	16	19	29	34	30	ENSDARG00000009488	TRUE	0.653114	GIPC2
0.7	2	8	7	6	2	0.9	0.3	0.2	0.2	0.8	0.6	2	3	2	2	3	3	ENSDARG00000009493	TRUE	0.960166	SI:CH211-45C16.2
224	143	98	79	38	51	78	107	124	98	84	74	53	55	29	17	17	12	ENSDARG00000009494	TRUE	0.685362	XRCC1
0.2	0.1	0.3	0.7	0.2	0.1	0.1	0.3	1	1	3	3	4	6	6	7	8	9	ENSDARG00000009499	TRUE	1.11778	SYNE1A
124	180	327	342	213	112	76	77	64	69	83	77	80	100	86	152	107	103	ENSDARG00000009505	TRUE	0.635817	PRELID3B
10	15	37	45	24	12	10	8	6	5	5	5	5	5	8	7	9	10	ENSDARG00000009524	TRUE	0.910248	RNF150B
76	67	75	75	56	37	31	41	54	64	66	60	64	83	72	59	61	63	ENSDARG00000009525	TRUE	0.225712	TIAL1
74	91	85	76	76	69	78	93	127	106	105	75	58	56	46	37	30	25	ENSDARG00000009534	FALSE	0.375684	WLS
				62	134	142	135	126	125	127	107	96	73	95	168	107	116	ENSDARG00000009544	TRUE	0.242242	CLDNB
11	14	20	18	13	13	12	16	26	19	21	21	18	22	18	20	23	22	ENSDARG00000009549	FALSE	0.2322	UBR4
						0.4	0.9	4	5	9	19	15	9	14	17	16	19	ENSDARG00000009550	TRUE	0.643214	FOXI3B
									6	15	30	60	101	182	248	187	169	ENSDARG00000009553	TRUE	0.796789	GNG3
90	73	74	58	47	9	13	14	19	15	19	23	24	22	13	8	7	6	ENSDARG00000009557	FALSE	0.893174	WRAP73
0.1	0.1	0.1	0.2	0.4	0.4	0.6	0.4	0.3	0.8	5	12	13	15	14	17	18	16	ENSDARG00000009567	TRUE	1.16466	SPEGB
						0.4	0.9	0.8	0.7			0.4	0.4	1	4	6	6	ENSDARG00000009568	TRUE	1.1325	CA10B
3	2	9	12	14	17	22	26	38	42	50	70	69	64	65	64	60	62	ENSDARG00000009585	TRUE	0.656634	PAPOLA
	0.6	2	1	1	1	2	2	25	23	23	29	16	28	23	102	102	110	ENSDARG00000009594	TRUE	1.30973	NR1D2B
98	108	85	88	75	60	33	24	37	38	38	33	31	33	26	24	21	18	ENSDARG00000009607	FALSE	0.604036	CCNC
3	8	20	15	11	4	2	7	21	20	20	16	17	24	14	8	7	7	ENSDARG00000009610	TRUE	0.558245	RGS12A
															0.8	9	28	ENSDARG00000009612	TRUE	1.10736	CHIA.3
					0.1	0.6	0.6	0.2	0.5	0.5	0.7	0.9	1	1	2	1	1	ENSDARG00000009624	TRUE	0.613142	UTS2R
1	2	9	9	6	1					0.9	2	2	2	3	7	8	10	ENSDARG00000009626	TRUE	0.771541	NRBP2B
39	66	87	105	98	67	51	61	46	33	35	22	21	24	13	10	9	11	ENSDARG00000009629	TRUE	0.690049	UNC119.1
					0.2		0.2	1	1	1	0.5	1	2	1	133	82	84	ENSDARG00000009637	TRUE	1.81223	RCVRN3
3	16	45	65	68	111	154	215	377	397	395	348	287	386	256	193	151	99	ENSDARG00000009640	TRUE	0.703865	PSMB1
20	9	35	27	30	16	29	44	43	50	40	28	21	29	24	19	14	11	ENSDARG00000009653	TRUE	0.433016	LHFPL2A
19	26	41	46	54	59	57	52	41	42	34	24	22	25	22	18	19	19	ENSDARG00000009657	TRUE	0.425081	FGFR1OP2
	0.4					0.4		0.5	0.8		0.6							ENSDARG00000009673	TRUE	0.309874	IFI44F5
19	21	40	45	31	15	4	2	5	6	8	11	10	10	10	15	18	17	ENSDARG00000009677	TRUE	0.751528	DLG1
138	106	175	177	138	90	75	68	49	50	45	39	29	30	22	15	14	12	ENSDARG00000009681	FALSE	0.774897	MED27
	0.2	0.3	0.3	0.6	2	3	4	9	7	7	7	5	6	6	7	7	6	ENSDARG00000009685	TRUE	0.640779	PPA2
2	3	5	4	2	2	4	9	22	30	38	36	32	40	34	30	25	21	ENSDARG00000009689	TRUE	0.777441	DAAM1B
187	168	116	115	48	17	11	14	14	15	17	15	16	21	14	10	10	10	ENSDARG00000009693	TRUE	1.28241	LLGL1
					0.5	0.3	0.3	0.4	0.2	0.3	0.4	0.1	0.4	0.3	0.2	2	2	ENSDARG00000009702	TRUE	1.13031	SI:CH211-210P4.6
39	32	68	58	45	34	47	81	146	128	170	182	168	156	142	125	122	94	ENSDARG00000009724	FALSE	0.514122	RPN2
					0.9				0.5	1	2	2	2	2	2	4	3	ENSDARG00000009727	TRUE	0.527466	TWF2B
2	6	14	12	8	3	0.8	1	2	2	3	3	2	4	3	2	2	1	ENSDARG00000009733	TRUE	0.955576	KIF21B
15	20	188	180	119	50	61	68	51	41	48	48	35	32	28	25	25	23	ENSDARG00000009735	TRUE	0.876226	GIGYF2
		0.7								0.3	0.5	0.5	1	0.6	1	3	3	ENSDARG00000009738	TRUE	0.898334	CACNB4A
208	289	277	313	341	300	180	134	126	103	85	61	57	67	54	53	44	41	ENSDARG00000009740	TRUE	0.710198	PPP1R7
	0.4	2	2	2	1	0.5	0.4	4	7	9	8	6	3	3	2	2	2	ENSDARG00000009743	TRUE	0.843452	EFHC1
47	94	186	194	120	17	13	19	23	21	26	18	17	20	18	18	16	16	ENSDARG00000009745	FALSE	1.20091	FBXW2
11	23	32	38	34	18	23	22	21	19	15	12	13	13	9	9	9	7	ENSDARG00000009748	FALSE	0.504216	DFFB
159	179	99	122	144	235	226	219	171	159	124	105	83	90	75	65	51	49	ENSDARG00000009753	FALSE	0.452779	SF3B6
70	89	210	187	74	88	93	100	75	66	67	49	47	61	46	43	43	46	ENSDARG00000009754	FALSE	0.577848	ZC3H11A
27	36	33	43	20	9	6	7	16	18	15	13	13	16	12	14	19	22	ENSDARG00000009764	TRUE	0.535406	SREK1
162	174	134	100	32	6	6	9	18	20	20	28	37	39	46	69	54	51	ENSDARG00000009771	FALSE	0.939056	PPME1
713	629	341	309	191	147	129	118	68	62	50	48	53	64	71	90	101	159	ENSDARG00000009779	TRUE	1.05476	MCL1A
0.1	0.3	0.8	0.4	0.3						0.1	0.6	0.7	0.4	0.8	16	25	18	ENSDARG00000009782	TRUE	1.77048	MYH11A
135	192	150	134	128	47	24	21	17	19	12	13	9	11	11	19	23	21	ENSDARG00000009783	TRUE	1.11802	SLC49A4
31	45	31	46	14	3	0.6	0.4	4	5	7	7	10	14	19	32	33	35	ENSDARG00000009796	TRUE	0.828793	KLC1A
16	24	98	106	87	64	54	49	84	79	70	44	27	23	12	15	16	11	ENSDARG00000009806	FALSE	0.663864	SMFN
								3	5	7	6	9	17	7	2	2	2	ENSDARG00000009822	TRUE	0.76578	HER4.4
						0.2	1	16	41	53	69	117	221	125	42	43	37	ENSDARG00000009823	TRUE	0.990145	POU3F1
			0.6					1	0.4	0.9	3	8	8	10	15	14	11	ENSDARG00000009825	TRUE	0.853688	MMP23BB
13	29	223	301	319	345	339	362	392	332	400	447	446	325	381	387	423	389	ENSDARG00000009830	TRUE	0.379087	HDLBPA
1	1	18	21	17	17	14	20	44	33	37	32	26	24	19	21	17	17	ENSDARG00000009837	TRUE	0.516546	AGK
	0.9	2	0.7	2	0.9	0.4	2	4	6	12	14	12	10	8	8	9	10	ENSDARG00000009839	TRUE	0.778569	FAM117BB
2	10	19	22	20	23	23	12	6	6	3	2	3	3	4	3	34	39	ENSDARG00000009844	TRUE	0.897457	DUSP23A
96	108	61	59	53	33	13	6	6	6	9	11	11	13	20	22	21	21	ENSDARG00000009851	FALSE	0.986392	WDR41
36	55	58	66	62	91	97	67	37	30	28	16	14	17	9	8	5	4	ENSDARG00000009862	FALSE	0.759277	DCPS
	1	15	28	32	24	35	38	48	37	36	22	16	18	10	7	9	10	ENSDARG00000009864	TRUE	0.590625	DDX55
14	23	57	49	34	13	3	9	15	16	22	21	19	21	22	29	35	41	ENSDARG00000009868	FALSE	0.56836	DCAF11
2	7	19	15	12	10	8	10	8	5	7	10	8	9	6	8	13	13	ENSDARG00000009870	TRUE	0.416023	MAPK8B
919	1017	652	731	956	1099	1062	750	344	295	261	216	185	193	134	81	60	41	ENSDARG00000009871	FALSE	0.778852	SNRPC
								0.5										ENSDARG00000009874	TRUE		CYP2K31
			5	197	302	355	314	274	280	256	233	230	240	196	125	117	127	ENSDARG00000009881	TRUE	0.423091	IER5
0.4	1	2	2	1	0.6			0.3	0.3							0.4		ENSDARG00000009885	TRUE	0.770121	SULT3ST1
13	16	37	46	37	14	6	4	3	3	5	4	6	4	6	9	16	20	ENSDARG00000009886	TRUE	0.954929	RNF114
								3	2	6	10	7	6	5	8	10	10	ENSDARG00000009899	TRUE	0.428265	ZNF385A
				0.1	0.6	1	5	5	4	8	7	10	8	10	17	16	18	ENSDARG00000009901	TRUE	0.754012	SLC38A5A
					0.3		7	25	18	16	11	9	13	20	28	18	18	ENSDARG00000009922	TRUE	0.506017	DMBX1A
											0.8	0.8	2	4	7	11	8	ENSDARG00000009930	TRUE	0.824607	CADM2A
0.3	1	4	4	4	5	7	12	21	11	12	17	18	15	14	35	49	36	ENSDARG00000009939	TRUE	0.904133	MICU2
										0.5	0.6	1	2	6	13	14	14	ENSDARG00000009941	TRUE	0.983419	ERC1A
941	709	602	557	637	431	377	188	94	68	68	84	54	41	23	12	12	9	ENSDARG00000009942	TRUE	1.09786	CDC6
0.4	3	3	2	1	2	4	7	2	3	5	2	3	6	9	20	19	22	ENSDARG00000009949	TRUE	1.08256	FNDC4B
227	370	232	260	300	376	433	417	335	296	277	268	237	183	183	187	191	193	ENSDARG00000009950	FALSE	0.296012	EDF1
27	84	130	112	79	40	37	47	41	30	35	34	26	28	20	13	13	11	ENSDARG00000009953	FALSE	0.760224	MED14
7	10	47	50	19	8	9	12	13	8	11	10	10	11	12	10	11	10	ENSDARG00000009958	TRUE	0.839794	CBL
12	15	34	38	29	10	10	10	3	0.8	0.5	2	1		0.5	0.6	0.5		ENSDARG00000009961	TRUE	1.20876	RUNDC3B
					10	7	41	47	111	219	578	1055	827	1691	1369	1177	983	ENSDARG00000009978	TRUE	0.949429	ICN
0.2	0.5	2	3	5	13	13	14	14	10	11	10	10	13	13	18	18	20	ENSDARG00000009982	FALSE	0.578198	FAM199X
46	59	98	125	99	34	16	18	24	17	21	20	20	21	19	26	26	24	ENSDARG00000010002	TRUE	0.843015	GNA11A
		1		0.5	0.5	1	2	28	72	94	143	200	176	110	98	111	143	ENSDARG00000010008	TRUE	0.885167	VIM
19	20	36	38	21	5	5	7	4	4	4	4	3	4	5	22	29	32	ENSDARG00000010010	TRUE	0.864289	TRIM13
3	7	15	12	9	6	5	9	11	13	15	19	16	16	24	29	26	25	ENSDARG00000010018	TRUE	0.531094	QKI2
4	13	63	78	66	38	21	21	48	50	53	50	39	34	29	41	29	19	ENSDARG00000010021	TRUE	0.506558	GRPEL1
8	10	11	10	11	4	1	0.4	1	2	3	3	3	4	4	15	18	17	ENSDARG00000010023	TRUE	0.817596	MFSD14BA
0.2	0.9										0.7	0.9	1	0.9	4	5	4	ENSDARG00000010029	TRUE	0.931437	SPON1A
8	8	16	13	12	6	2	0.8	3	4	3	2	3	5	4	7	11	10	ENSDARG00000010031	TRUE	0.667801	SSH1B
				13	17	13	9	10	9	10	14	17	17	16	23	20	19	ENSDARG00000010032	TRUE	0.295614	CMTM7
3	14	19	19	13	11	4	5	9	6	7	7	8	7	6	7	8	6	ENSDARG00000010035	FALSE	0.525639	ENGASE
								0.1	0.2	1	1	3	3	5	20	25	24	ENSDARG00000010042	TRUE	1.2606	DNM1A
3	3	21	20	10	7	4	1	4	5	4	6	5	5	6	8	11	10	ENSDARG00000010047	TRUE	0.738569	NEU3.2
55	43	64	52	52	35	32	26	37	52	57	43	42	66	51	49	45	47	ENSDARG00000010051	FALSE	0.223206	UFD1L
113	106	84	79	76	40	31	9	23	26	26	24	22	26	21	37	42	39	ENSDARG00000010052	TRUE	0.684894	NDRG3B
						0.3	0.5	1	1	1	2	2	2	2	2	4	3	ENSDARG00000010059	TRUE	0.609731	ITPKB
12	14	31	23	10	2	0.8	1	4	4	4	6	6	6	6	9	10	11	ENSDARG00000010070	TRUE	0.868642	ADAM9
															1	1	0.7	ENSDARG00000010075	TRUE	0.19245	NA
23	8	37	30	35	43	66	74	68	58	63	51	40	41	26	19	17	13	ENSDARG00000010078	FALSE	0.510739	NUP133
3	4	5	5	3	0.7	0.1		0.7	0.9	3	5	8	12	16	20	17	17	ENSDARG00000010083	TRUE	0.939965	RBFOX3A
				2	30	38	38	32	18	22	27	34	16	28	21	14	11	ENSDARG00000010085	TRUE	0.451479	P4HA2
								0.9	0.8	0.3	0.4	0.9	2	3	9	10	9	ENSDARG00000010096	TRUE	1.10857	SLC1A6
1	3	2	3	1												0.5	2	ENSDARG00000010097	TRUE	0.556657	F9A
36	34	41	46	20	11	11	17	20	13	19	27	26	33	32	32	38	28	ENSDARG00000010098	TRUE	0.389612	PANK1B
27	58	66	57	45	32	17	17	17	17	23	22	23	33	32	37	30	24	ENSDARG00000010108	FALSE	0.472923	BRI3BP
41	21	28	31	29	62	89	105	123	138	166	172	174	199	214	263	254	217	ENSDARG00000010113	FALSE	0.635617	NDUFB8
				2	122	234	322	44	28	15	6	1	0.8	2	2	2	2	ENSDARG00000010124	FALSE	1.80595	NA
								0.5		2	3	7	8	4	8	28	26	ENSDARG00000010130	TRUE	1.06291	SMPDL3B
2	1	7	3	2	1	0.4	0.3	4	10	18	22	21	21	21	21	19	18	ENSDARG00000010132	TRUE	0.851991	DACHA
5	9	9	11	35	119	130	134	126	99	98	70	75	96	99	69	60	61	ENSDARG00000010137	TRUE	0.606255	LDB1A
					0.5	1	4	31	42	42	32	34	65	66	28	22	24	ENSDARG00000010144	TRUE	0.699231	PLPPR3A
		2	4	24	37	22	16	8	5	9	3	3	5	2	2	1	1	ENSDARG00000010145	TRUE	1.15897	TOR4AA;LOC101886311
						0.5	0.6	0.7		0.5						0.7	3	ENSDARG00000010146	TRUE	0.98387	CPA2
71	130	497	559	698	508	416	361	522	605	775	938	968	1081	1016	1382	1412	1125	ENSDARG00000010149	TRUE	0.536203	ATP5FA1
									0.6	1	1	2	2	4	6	6	4	ENSDARG00000010154	TRUE	0.715166	VSTM4A
7	4	5	3	2	6	12	25	34	28	34	31	27	21	25	28	28	23	ENSDARG00000010155	TRUE	0.613178	ABI1A
76	85	29	54	86	222	268	420	801	1205	976	1081	1079	1052	979	785	760	842	ENSDARG00000010160	FALSE	0.721812	RPS15A
10	12	34	59	25	4	3	5	9	8	10	10	12	7	10	16	13	11	ENSDARG00000010169	FALSE	0.933271	MYD88
5	15	66	60	30	10	12	13	16	14	18	14	12	16	12	9	9	8	ENSDARG00000010181	TRUE	0.899296	ASAP2A
		0.7	0.7	0.9	0.4	0.5	0.3		0.2		0.4	0.2	0.3	0.6	0.6	0.7	0.7	ENSDARG00000010183	TRUE	0.423659	SI:CH73-265H17.1
	0.1	1	0.6	1	1	0.9	0.6	0.2	1	0.4	0.6	1	2	1	3	3	4	ENSDARG00000010186	TRUE	0.869333	MYO3A
	0.2	1	2	0.8	0.3		5	27	18	18	13	14	13	6	2	3	2	ENSDARG00000010192	TRUE	1.04963	PAX3A
113	165	236	212	197	296	345	444	520	418	365	277	188	178	117	104	104	92	ENSDARG00000010194	TRUE	0.535707	EIF4BB
7	5	4	5	0.7	0.4	0.3	0.9	6	4	5	7	23	38	17	8	9	8	ENSDARG00000010207	TRUE	1.13698	SMAD3B
1			0.6												3	5	6	ENSDARG00000010231	TRUE	0.763332	PPM1NA
35	74	153	156	177	237	252	190	108	91	83	76	60	63	47	38	31	28	ENSDARG00000010238	FALSE	0.677227	RBM22
19	28	16	27	42	88	96	117	230	344	315	368	431	374	358	306	321	299	ENSDARG00000010244	TRUE	0.718597	RPL22L1
1017	968	735	706	721	809	619	555	847	790	654	390	271	318	163	143	93	77	ENSDARG00000010246	TRUE	0.561648	PRMT1
2	1	1	2		0.7	1	2	7	5	6	5	2	4	5	9	7	6	ENSDARG00000010248	TRUE	0.670945	WDR54
37	26	16	16	13	105	145	186	74	44	50	100	90	47	64	80	102	74	ENSDARG00000010250	FALSE	0.657294	NQO1
														0.5	0.6	0.8	0.7	ENSDARG00000010252	TRUE	0.198615	JAK3
23	21	75	52	22	12	6	2	8	8	8	9	8	5	4	4	3	3	ENSDARG00000010255	TRUE	1.26306	BIN2B
40	52	186	217	180	93	84	111	115	102	106	86	73	64	57	54	47	37	ENSDARG00000010266	TRUE	0.552655	IGF2BP3
6	4	7	8	6	4	3	1	3	2	3	13	16	7	15	22	46	46	ENSDARG00000010267	TRUE	1.15889	DPYDB
								8	23	15	12	10	12	18	7	4	5	ENSDARG00000010270	TRUE	0.523384	FEZF1
	0.3			1	21	25	16	9	3	3	1	0.9	1	5	10	13	9	ENSDARG00000010276	TRUE	0.999518	PTGS2B
46	53	48	50	45	36	37	45	41	35	38	36	30	30	30	32	38	31	ENSDARG00000010279	TRUE	0.188788	SCAMP2
2	3	46	58	50	30	15	17	16	15	18	14	13	20	17	16	16	16	ENSDARG00000010280	TRUE	0.716178	CLASP1A
14	37	157	112	79	31	31	36	43	38	35	25	18	19	12	12	11	10	ENSDARG00000010281	TRUE	0.973056	XPO4
												2	0.7	4	12	15	15	ENSDARG00000010294	TRUE	0.815766	FMODB
											0.1		0.4		1	0.5	0.4	ENSDARG00000010296	TRUE	0.681476	NA
14	18	30	30	11	6	6	8	6	4	5	3	4	3	4	4	6	7	ENSDARG00000010300	FALSE	0.901643	TRAF3IP1
42	94	91	85	76	72	57	51	39	30	27	18	16	18	15	19	17	16	ENSDARG00000010301	TRUE	0.660659	B4GALT6
								1	2	5	27	37	12	46	49	52	61	ENSDARG00000010312	TRUE	0.781576	CP
4	5	38	35	24	20	18	36	80	58	72	73	50	57	37	37	31	25	ENSDARG00000010316	TRUE	0.572745	QARS1
											0.7				1	1	2	ENSDARG00000010317	TRUE	0.483311	GPR183A
2	0.4			0.4		0.4		7	13	14	18	19	18	20	31	26	17	ENSDARG00000010318	TRUE	0.745205	SRPX
4	9	33	32	17	14	20	22	11	5	7	5	5	4	3	2	2	2	ENSDARG00000010331	TRUE	0.915033	NA
874	755	460	403	72	7	2	1	0.7	0.5	0.3		0.2						ENSDARG00000010332	TRUE	1.51312	ZGC:56231
2	4	5	3	8	188	273	199	13	3	2	3	8	10	6	4	2	3	ENSDARG00000010347	TRUE	2.05405	ACER1
						0.4		0.9	0.8	1	1	1	2	2	3	4	3	ENSDARG00000010350	TRUE	0.667801	C1QL3A
		2	0.8															ENSDARG00000010373	FALSE	0.606092	NA
129	129	216	246	198	151	144	124	113	115	105	91	78	94	82	64	59	57	ENSDARG00000010381	TRUE	0.438791	RNF2
										0.5	0.4					2	2	ENSDARG00000010384	TRUE	0.731285	LPAR5A
2	6	13	17	15	10	4		2	2	3	2	3	16	25	23	19	16	ENSDARG00000010385	TRUE	0.767111	SEPT4A
14	34	69	66	31	8	6	7	14	17	20	25	25	24	20	17	15	16	ENSDARG00000010400	TRUE	0.741394	LRRFIP2
2	2	13	14	6	0.5	0.1		0.5	0.3	0.2	0.3	0.5	0.7	0.8	3	3	4	ENSDARG00000010407	FALSE	1.42853	PPP4R4
1	1	4	3	1	0.8	0.9	2	20	21	20	17	15	18	19	8	8	8	ENSDARG00000010408	TRUE	0.864593	IGSF9B
10	22	61	60	40	25	25	30	35	37	43	35	32	45	32	40	47	47	ENSDARG00000010411	TRUE	0.34512	EPN1
0.7	1	3	2	2	1		2	3	3	3	3	2	4	3	5	6	5	ENSDARG00000010415	TRUE	0.516134	SIRT4
155	173		52	6	20	11	7	3	0.8	1			7	26	33	40	96	ENSDARG00000010420	TRUE	1.32363	NDRG1B
	2	1	0.8	0.9	2	0.4	0.5	3	2	1	3	17	17	24	18	20	23	ENSDARG00000010423	TRUE	1.15552	NPSN
0.5	0.6	1	1	0.5	0.6	0.2	0.7	1	2	2	1	0.7	0.7	0.9	6	8	5	ENSDARG00000010425	TRUE	1.22178	SCARA5
123	157	97	85	98	84	73	71	58	48	55	40	34	33	28	21	17	14	ENSDARG00000010432	TRUE	0.619614	EAF2
								0.8	1	2	4	7	8	11	22	32	31	ENSDARG00000010434	TRUE	1.01682	CLU
51	63	324	453	134	28	9	4	5	5	6	7	10	10	12	14	14	16	ENSDARG00000010437	TRUE	1.91561	TENT5C
5	12	31	35	39	41	39	29	14	8	8	8	9	8	10	18	26	33	ENSDARG00000010442	TRUE	0.631547	RNF11A
1	7	49	52	36	19	20	25	27	21	22	20	13	16	9	12	9	7	ENSDARG00000010445	FALSE	0.683917	TRABD
					1	2	2	0.7	0.6	0.4					2	0.8	0.4	ENSDARG00000010454	TRUE	0.636364	GUCA1A
					0.2			1	6	26	52	53	63	53	63	62	48	ENSDARG00000010472	TRUE	0.657995	ATP1A2A
								0.4	1	4	6	2	2	2	2	3	3	ENSDARG00000010477	TRUE	0.624484	P2RX3A
0.6	0.3	0.3	0.4	0.3	0.4	1	0.3	69	160	337	407	154	80	44	29	29	20	ENSDARG00000010478	TRUE	1.62175	HSP90AA1.1
924	1119	994	951	1182	1372	1423	984	781	610	525	375	270	320	224	168	124	95	ENSDARG00000010481	TRUE	0.642139	BZW1A
0.7	0.8	7	9	7	7	4	1	0.4	0.4	0.7	1	1	0.7	0.4	1	0.7	1	ENSDARG00000010482	TRUE	1.20228	PRG4A
178	118	156	169	208	289	410	410	299	254	231	179	153	157	95	52	33	19	ENSDARG00000010487	TRUE	0.595061	SAE1
0.9	2	7	6	3			0.3	0.8	0.7	2	3	5	4	3	5	7	7	ENSDARG00000010515	TRUE	0.672132	DVL1A
50	95	72	97	164	420	582	772	1685	2358	2421	2099	2054	1937	1734	1329	1391	1543	ENSDARG00000010516	FALSE	0.752202	RPL21
0.9	3	11	12	12	6	3	2	11	10	14	9	6	12	6	13	19	29	ENSDARG00000010519	TRUE	0.679229	PER3
9	21	52	60	27	12	12	19	12	7	9	9	8	9	8	8	10	7	ENSDARG00000010524	TRUE	0.925083	SI:CH211-282J22.3
9	10	13	17	13	4	4	12	19	22	30	29	24	18	17	18	17	16	ENSDARG00000010531	TRUE	0.446304	SCAMP4
471	457	278	259	317	227	141	129	130	118	104	75	68	79	68	71	50	36	ENSDARG00000010553	TRUE	0.788228	MMGT1
			0.3									0.4			5	5	6	ENSDARG00000010555	TRUE	0.826369	PDHA1B
									0.7	2	2	3	3	2	2	2	1	ENSDARG00000010556	TRUE	0.388908	MMP25B
9	17	87	82	76	42	46	42	32	29	30	23	23	23	20	16	15	11	ENSDARG00000010563	TRUE	0.696326	SPOPLA
											3	4	4	2	2	3	4	ENSDARG00000010565	TRUE	0.286279	AQP4
10	15	98	107	101	126	124	115	58	50	56	48	42	55	34	18	14	8	ENSDARG00000010571	TRUE	0.691488	EZH2
84	71	232	345	113	14	12	13	12	10	11	13	13	13	16	21	23	25	ENSDARG00000010572	TRUE	1.57329	SLC25A25A
23	39	62	53	50	36	25	15	15	8	9	9	8	8	7	6	7	6	ENSDARG00000010583	TRUE	0.862857	PARD3AB
	0.6	5	6	3	1	2	3	10	7	5	7	6	3	5	4	3	3	ENSDARG00000010586	FALSE	0.556015	TEX9
								0.8	4	10	12	26	65	38	8	7	8	ENSDARG00000010591	TRUE	1.11634	FOXN4
25	47	44	19	14	20	16	21	41	37	39	33	35	50	44	43	34	29	ENSDARG00000010596	FALSE	0.34541	SLC7A6OS
8	12	23	26	15	2	0.6	0.7	6	5	6	6	6	5	5	7	7	9	ENSDARG00000010601	TRUE	0.828339	MTMR10
														3	3	3	2	ENSDARG00000010602	TRUE	0.181818	ZGC:112294
32	58	89	70	75	61	53	24	19	15	14	11	10	13	12	15	14	14	ENSDARG00000010603	TRUE	0.796373	KCTD9B
2	2	13	18	15	10	6	2	1	4	4	6	6	14	17	11	10	9	ENSDARG00000010610	FALSE	0.655977	SARM1
								0.3		0.3					0.4	0.4	0.9	ENSDARG00000010619	TRUE	0.545648	THEMIS
				1			0.6	0.6	2	4	3	5	3	6	11	12	10	ENSDARG00000010625	TRUE	0.842017	CLIC2
							0.9	28	36	35	34	25	29	27	19	12	10	ENSDARG00000010630	TRUE	0.491738	HOXB6A
23	44	53	46	49	61	85	111	111	116	117	115	93	94	68	76	59	50	ENSDARG00000010641	TRUE	0.392461	SLC20A1B
2	3	10	7	7	0.8	0.1	0.1	0.8	0.9	1	2	2	1	2	2	2	2	ENSDARG00000010654	TRUE	1.05982	LOC569534
7	11	7	5	4	8	10	12	9	12	15	15	14	17	16	17	20	27	ENSDARG00000010655	TRUE	0.458934	PPM1K
5	6	17	17	18	7	6	5	6	13	16	17	11	8	11	23	21	30	ENSDARG00000010658	TRUE	0.545972	INSIG1
					0.9	2	1									0.9		ENSDARG00000010662	TRUE	0.446177	FBXO36A
105	57	99	84	66	62	63	65	7	5	6	7	6	4	6	10	10	9	ENSDARG00000010673	TRUE	0.987559	TRIM16
				5	68	76	75	47	10	7	2	4	4	17	183	90	72	ENSDARG00000010680	TRUE	1.09104	GNGT2A
39	44	47	41	26	8	2	2	12	12	13	13	10	10	9	16	16	15	ENSDARG00000010681	FALSE	0.771441	TJAP1
																	3	ENSDARG00000010700	TRUE		IL17D
					0.9	2	9	59	96	110	106	88	92	62	48	34	30	ENSDARG00000010710	TRUE	0.697525	MSI1B
	1	5	5	1								0.5			0.5	1	1	ENSDARG00000010712	TRUE	1.03525	NPFFR1L3
13	12	47	58	52	53	23	20	27	28	62	76	65	83	62	109	96	54	ENSDARG00000010717	TRUE	0.536474	CHCHD10
301	281	202	190	200	219	181	136	127	129	111	86	69	74	57	70	58	52	ENSDARG00000010721	TRUE	0.551911	SEPT6
103	67	24	28	11	2	0.8	2	4	6	5	4	6	8	11	21	19	18	ENSDARG00000010727	TRUE	1.38451	TTYH2L
	0.8		0.4	0.8	0.4	0.4		2	4	8	10	12	8	12	12	16	11	ENSDARG00000010728	TRUE	0.841169	SCIN
					0.3			0.1	0.1	0.2			0.4	0.1	0.1	0.3	0.5	ENSDARG00000010729	TRUE	0.642857	IFI44D
22	54	62	68	66	36	18	3	3	6	10	19	14	9	10	9	6	6	ENSDARG00000010732	FALSE	0.986063	XRCC4
3	3	6	8	8	6	7	18	33	24	23	15	10	9	5	5	5	4	ENSDARG00000010738	FALSE	0.798738	ZGC:101716
11	39	82	85	96	115	110	105	191	144	167	134	123	170	146	108	101	94	ENSDARG00000010745	TRUE	0.394494	DNAJA2B
31	36	67	62	64	34	11	3	6	8	12	11	6	5	5	5	6	7	ENSDARG00000010752	TRUE	1.06529	ACSL4B
0.2	0.3	1	0.9	0.5	0.2			1	0.9	1	2	1	2	2	2	2	2	ENSDARG00000010756	TRUE	0.594564	NOD2
	0.2	1	0.4	0.7	0.7	0.7	0.4			3	10	15	14	19	14	15	10	ENSDARG00000010758	TRUE	1.01332	CAPN12
									0.3	0.6	0.6	0.2			1	4	11	ENSDARG00000010764	TRUE	1.56614	FLJ13639
	0.4	3	3	0.8	0.1		0.1	0.7	2	2	5	7	7	3	2	2	2	ENSDARG00000010767	TRUE	0.866913	EPHA4L
	0.4	0.9	3	220	606	617	447	521	487	425	330	262	229	90	38	32	29	ENSDARG00000010770	TRUE	0.887407	SOX19A
4	5	9	10	7	5	3	1	2	2	3	4	6	10	6	8	9	8	ENSDARG00000010773	TRUE	0.510026	PNPLA6
53	83	247	208	128	78	76	64	40	35	32	31	26	31	21	19	16	18	ENSDARG00000010779	TRUE	0.980314	TLK2
27	17	16	13	9	2	2	0.8	0.9	1	0.3	0.9	0.3						ENSDARG00000010782	TRUE	1.25478	PPT2A.2
11	10	62	67	20	12	15	15	15	13	15	16	13	14	11	13	14	13	ENSDARG00000010784	TRUE	0.855407	PPP1R12A
							0.1	8	8	14	23	30	34	42	85	65	57	ENSDARG00000010785	TRUE	0.805532	THBS1B
23	25	30	39	28	5	2	0.9	12	10	14	19	20	24	17	16	17	17	ENSDARG00000010789	TRUE	0.554215	HOMER3B
				0.2	2	9	26	48	56	69	81	117	162	62	15	14	14	ENSDARG00000010791	TRUE	0.98526	DLA
122	220	553	531	386	199	142	127	86	87	86	84	76	77	41	17	18	14	ENSDARG00000010792	TRUE	1.03674	CDC25B
0.6	0.8	0.6	0.8	1	2	3	3	2	1	2	2	2	2	3	5	9	8	ENSDARG00000010794	TRUE	0.904432	TFEB
2	5	16	19	14	5	1			0.1	1	2	3	5	8	14	15	14	ENSDARG00000010816	TRUE	0.832534	SLC7A14A
166	152	148	146	148	86	56	37	55	49	50	51	43	47	48	28	30	23	ENSDARG00000010823	FALSE	0.668627	MEMO1
30	35	36	53	43	53	41	45	46	47	37	31	30	31	32	37	38	32	ENSDARG00000010831	FALSE	0.196239	CHURC1
0.6	10	2	4	10	16	11	12	17	12	17	16	18	17	16	20	19	15	ENSDARG00000010844	TRUE	0.44757	KRAS
14	36	57	44	8	2	2	4	17	10	11	12	10	6	7	19	33	25	ENSDARG00000010862	TRUE	0.881421	AMT
45	40	44	36	64	128	156	145	54	57	72	100	97	64	79	60	76	104	ENSDARG00000010873	TRUE	0.453661	SI:DKEY-156N14.5
0.9		1	1	88	127	87	125	134	161	159	121	119	154	106	27	22	18	ENSDARG00000010878	TRUE	0.703553	CDKN1CA
5	6	16	14	11	7	7	9	14	11	11	8	5	6	4	4	4	3	ENSDARG00000010905	TRUE	0.490069	METTL13
8	11	20	18	9	3	5	7	10	8	9	10	9	12	12	11	9	10	ENSDARG00000010918	FALSE	0.395549	NPRL3
											0.3	0.4	1	2	11	8	7	ENSDARG00000010925	TRUE	1.02391	HTRA3B
		0.1	0.1	0.2	0.1		0.1	0.8	0.1	0.5	0.2	0.6	0.5	0.8	14	10	6	ENSDARG00000010933	TRUE	1.88377	NA
												0.3	0.3		2	2	2	ENSDARG00000010934	TRUE	0.7054	SYT14A
10	3	13	6	1	0.3								0.5	1	7	44	53	ENSDARG00000010936	TRUE	1.45246	ABCB4
					1	2	11	6	4	3	3	3	2	3	4	3	2	ENSDARG00000010940	TRUE	0.700998	NA
3	8	24	27	10	3	2	3	4	2	3	4	3	5	4	6	6	5	ENSDARG00000010941	TRUE	1.0525	POMGNT2
		0.8	0.8		1	3	6	5	4	4	5	4	5	5	5	7	9	ENSDARG00000010945	TRUE	0.526829	RAPGEF6
103	98	56	54	67	139	172	217	76	57	70	67	59	46	29	31	20	26	ENSDARG00000010946	TRUE	0.680633	CBSB
181	238	104	73	50	96	188	204	149	109	115	123	103	110	69	30	26	16	ENSDARG00000010948	TRUE	0.570768	KIF11
0.5	0.9	3	2	0.9				2	4	5	7	8	12	18	36	35	40	ENSDARG00000010953	TRUE	1.20317	NDEL1A
12	25	30	17	13	6	5	5	15	15	16	17	15	13	14	17	17	17	ENSDARG00000010956	TRUE	0.412152	SH3GLB1B
								0.4	0.4	2	3	4	7	11	20	21	20	ENSDARG00000010957	TRUE	0.95833	MPP2B
							0.4				0.3	0.4		1	17	15	11	ENSDARG00000010958	TRUE	1.17837	GLMNB
				25	100	89	69	50	64	58	51	57	41	47	45	24	10	ENSDARG00000010962	TRUE	0.465035	FKBP7
7	15	56	51	71	120	162	193	346	345	353	297	250	326	193	163	127	103	ENSDARG00000010965	TRUE	0.671211	PSMA8
				0.5	2	2	8	11	6	7	9	11	13	9	7	6	5	ENSDARG00000010977	TRUE	0.532425	RAB34B
20	28	48	45	44	33	23	18	37	34	26	17	10	8	6	6	6	6	ENSDARG00000010978	TRUE	0.63301	TRMT1
10	10	10	14	14	10	4	2	2	2	2	3	2	2	3	4	5	5	ENSDARG00000010981	TRUE	0.745155	ZDHHC3A
993	911	682	577	642	259	90	48	64	61	60	56	52	54	44	32	32	28	ENSDARG00000011000	TRUE	1.28755	GTF2A1
699	583	373	396	546	827	882	799	689	473	515	434	380	385	391	233	185	131	ENSDARG00000011020	TRUE	0.438979	HNRNPA1A
															2	3	2	ENSDARG00000011023	TRUE	0.247436	PDLIM3A
2	6	7	3	2	2	2	3	3	4	5	4	3	4	4	3	2	2	ENSDARG00000011026	FALSE	0.431061	ZGC:92907
15	28	35	42	31	38	23	27	39	34	37	17	15	19	14	16	18	15	ENSDARG00000011027	TRUE	0.38574	FGFR1A
4	5	9	7	4	1				0.5	0.5	0.6	0.5	1	2	4	6	5	ENSDARG00000011042	FALSE	0.815151	PGBD5
6	10	79	100	82	42	18	12	13	7	8	6	5	4	4	6	6	4	ENSDARG00000011049	TRUE	1.35556	SLC17A9B
0.9	0.7	15	22	26	22	20	24	25	24	26	25	23	29	30	44	55	58	ENSDARG00000011055	FALSE	0.56487	FBXO9
7	6	6	9	6	4	2	0.4	4	6	10	21	24	29	26	56	72	81	ENSDARG00000011065	TRUE	1.19617	CAMK2B1
								0.8	0.1	0.9	1	2	3	2	11	9	8	ENSDARG00000011066	TRUE	1.05296	GLRA3
64	63	45	32	13	5	11	15	10	13	10	10	7	9	4	2	4	3	ENSDARG00000011072	TRUE	1.1091	DDX11
								3	0.7	0.5	8	32	33	42	25	27	22	ENSDARG00000011076	FALSE	0.78234	ZGC:91968
15	22	44	39	34	49	68	87	123	86	86	63	40	38	22	21	26	29	ENSDARG00000011079	TRUE	0.601181	WDR3
					0.8	1	2											ENSDARG00000011083	TRUE	0.507561	SI:DKEY-42L23.2
			0.3		0.3	0.2	0.5	1	2	3	2	3	5	8	11	10	11	ENSDARG00000011088	TRUE	1.01409	SI:CH211-288D18.1
										0.3		0.9	2	1	3	4	3	ENSDARG00000011091	TRUE	0.670322	DRD2B
984	837	818	726	766	626	479	202	105	91	87	89	72	68	40	21	15	10	ENSDARG00000011094	TRUE	1.05726	CCNA2
															3	3	3	ENSDARG00000011113	TRUE	0	CHRNA10A
0.1	0.2	0.8	0.2	1	1	2	2	5	5	5	5	6	6	8	16	13	15	ENSDARG00000011122	TRUE	0.995726	PPTC7A
2740	2572	1620	1492	2057	2397	2768	2224	1530	1684	1256	899	703	773	422	291	204	169	ENSDARG00000011125	FALSE	0.623132	SNRPB
0.7	0.3	2	2	1	0.7	0.8	0.2	9	29	44	40	46	63	78	69	55	43	ENSDARG00000011141	TRUE	1.03988	DPYSL5A
3	7	14	17	26	63	70	87	80	74	75	85	93	89	116	143	150	102	ENSDARG00000011146	FALSE	0.610434	UQCRB
10	7	4	7	4	6	6	7	15	14	12	9	6	8	5	4	4	4	ENSDARG00000011152	FALSE	0.470056	RPP14
2	7	35	35	20	14	17	17	27	19	18	17	13	13	9	11	14	16	ENSDARG00000011157	TRUE	0.505238	ARHGEF18A
		0.3	0.7		0.3	0.9	4	6	6	10	13	16	15	16	20	21	20	ENSDARG00000011163	TRUE	0.784494	SEMA3FA
				0.5	27	59	87	32	16	19	28	63	56	112	65	63	54	ENSDARG00000011166	TRUE	0.618622	CAHZ
0.4	0.3	0.6	0.6	0.6	0.2	0.2	0.3	2	3	6	20	39	51	75	97	109	86	ENSDARG00000011170	TRUE	1.41867	NDRG2
		0.3		0.4	0.4	0.6	0.8	0.6	0.7	1	2	2	5	5	11	12	14	ENSDARG00000011171	TRUE	1.27447	SI:CH211-12M10.1
13	16	34	28	31	18	14	27	42	44	54	73	73	70	80	122	111	89	ENSDARG00000011175	FALSE	0.645735	ATP6V1D
5	8	43	50	16	9	13	14	8	9	9	12	13	17	18	32	31	31	ENSDARG00000011188	TRUE	0.694486	ACVR2AA
7	10	26	24	25	41	47	51	35	21	21	20	17	17	8	8	10	10	ENSDARG00000011190	TRUE	0.613651	FGFR1B
41	70	108	107	110	78	59	49	83	72	72	59	43	48	33	31	28	18	ENSDARG00000011196	TRUE	0.457086	DNAJC11A
474	429	143	206	295	646	580	920	2029	3197	2749	2837	3029	2997	2713	1933	1884	1933	ENSDARG00000011201	TRUE	0.705254	RPLP2L
							0.4	0.7	0.5	1	1	2	2	4	15	23	26	ENSDARG00000011208	FALSE	1.40869	NA
158	217	96	85	69	104	138	156	128	91	83	78	63	69	58	61	59	56	ENSDARG00000011219	TRUE	0.452821	AKT2
						2	6	11	13	21	9	12	19	16	10	13	13	ENSDARG00000011222	TRUE	0.431412	CCDC28B
21	35	117	112	109	104	56	11	8	9	12	20	18	16	13	14	15	15	ENSDARG00000011233	TRUE	1.04217	PCYT1AA
0.6	0.5	0.7	0.4	1	6	22	109	60	25	29	30	32	85	111	50	37	39	ENSDARG00000011235	TRUE	1.00771	OTX2B
232	159	92	89	34	14	4	1	5	11	22	13	15	9	12	18	15	13	ENSDARG00000011239	TRUE	1.48974	PPP1R14AA
2	2	7	8	9	19	25	41	44	45	40	26	19	21	21	20	16	18	ENSDARG00000011240	FALSE	0.642741	IFT46
0.2	0.2	8	0.2	24	107	79	55	21	17	22	25	23	16	19	15	19	21	ENSDARG00000011245	TRUE	1.05592	ESRP1
4	10	48	48	76	170	208	192	96	73	76	53	38	33	23	24	20	17	ENSDARG00000011246	FALSE	0.926127	KRR1
19	29	28	22	22	46	62	56	43	42	37	24	21	32	21	20	24	26	ENSDARG00000011247	TRUE	0.406869	RNPC3
						0.2	1	2	2	2	2	2	3	3	8	9	8	ENSDARG00000011257	TRUE	0.855819	ENPP2
								0.1	0.3	0.3	0.4	0.9	1	2	6	6	7	ENSDARG00000011259	TRUE	1.15837	TRPM1A
286	226	67	47	19	38	36	39	31	27	24	17	17	14	10	3	3	2	ENSDARG00000011262	FALSE	1.53706	TRAIP
5	13	54	42	10	10	10	21	33	44	49	48	53	50	57	54	50	36	ENSDARG00000011272	FALSE	0.52613	UQCC2
		1	0.8		0.5	0.4		4	10	10	8	13	13	20	12	11	9	ENSDARG00000011273	TRUE	0.737991	TLX2
3	9	21	16	6	2	2	4	10	7	11	9	11	11	8	8	12	11	ENSDARG00000011298	TRUE	0.537511	ATF7A
180	227	176	148	205	161	132	106	73	63	59	34	32	32	26	23	21	21	ENSDARG00000011299	FALSE	0.750465	BLZF1
2	2	26	31	24	11	6	6	20	26	30	36	30	41	39	38	31	20	ENSDARG00000011301	TRUE	0.555218	NAE1
138	114	127	96	63	59	51	52	57	44	46	38	31	34	31	26	24	18	ENSDARG00000011312	TRUE	0.622947	STK3
		0.7	1			1		1	1	2	5	5	4	2	0.6	1	0.7	ENSDARG00000011317	TRUE	0.85264	ADRA1BA
				0.5	2	0.9	3	2	1	2	2	2	0.5	0.5	0.5	0.5		ENSDARG00000011326	TRUE	0.638737	ANKRD45
8	10	52	51	33	9	4	9	11	11	14	13	14	23	15	8	9	10	ENSDARG00000011333	TRUE	0.837828	ARHGAP33
									0.3	1	0.6	0.4	0.5	2	21	27	34	ENSDARG00000011334	TRUE	1.41729	NCALDB
31	57	80	95	31	44	68	61	43	41	35	22	22	34	22	15	15	15	ENSDARG00000011360	TRUE	0.573708	NFATC2IP
64	62	71	75	64	7	2	0.6	9	10	13	15	22	37	41	35	33	34	ENSDARG00000011370	TRUE	0.75922	FYNA
		1	2	3	0.9	0.5	0.5	0.5	3	5	7	11	6	16	29	30	18	ENSDARG00000011371	TRUE	1.18506	ZGC:64106
216	383	415	391	72	8	3	2	3	2	2	2	4	4	3	3	7	15	ENSDARG00000011373	TRUE	1.78329	MKNK2A
				1	9	9	7	2	2	2	5	5	3	5	5	9	12	ENSDARG00000011376	TRUE	0.616123	DNASE1L4.2
									3	17	18	19	11	13	11	11	12	ENSDARG00000011400	TRUE	0.38095	TNNC1A
51	56	224	256	129	133	121	177	262	208	214	191	155	123	62	38	41	22	ENSDARG00000011404	TRUE	0.575774	FEN1
224	191	109	137	204	339	323	436	810	1132	1073	1138	1105	959	888	664	687	803	ENSDARG00000011405	FALSE	0.608025	RPS9
0.3	0.6	0.7	0.5	0.4	1	2	1	47	82	159	224	279	241	307	434	356	253	ENSDARG00000011407	TRUE	1.12186	COL2A1B
10	12	15	13	14	8	9	6	5	6	7	5	8	8	7	11	15	11	ENSDARG00000011410	TRUE	0.352526	AADAT
90	137	193	191	169	118	58	42	55	63	55	52	37	30	24	34	34	24	ENSDARG00000011418	FALSE	0.740294	SIGMAR1
								0.4	0.9	3	6	7	6	5	7	8	7	ENSDARG00000011422	TRUE	0.534118	RYR1A
								1	0.8	2	3	2	2	2	3	4	3	ENSDARG00000011434	TRUE	0.430133	PTGER2A
12	18	26	22	5	4	4	4	3	2	4	6	5	5	6	8	12	15	ENSDARG00000011445	TRUE	0.7882	MIDEASA
0.9	0.3	1	2	0.4				0.2	0.2	0.4	0.8	0.6	1	0.9	2	3	2	ENSDARG00000011449	TRUE	0.794338	FES
5	3	10	8	4	2	2	4	17	16	27	36	35	43	28	33	34	28	ENSDARG00000011459	TRUE	0.766582	GSNA
41	26	25	30	31	31	23	23	51	45	53	42	41	45	46	48	41	36	ENSDARG00000011462	TRUE	0.259644	OTUB1B
											0.6	1		0.5	0.5	2	2	ENSDARG00000011463	TRUE	0.655555	LOC100004411
3	4	24	33	9	5	9	7	6	6	7	9	8	8	10	12	8	6	ENSDARG00000011466	TRUE	0.760186	AFG1LA
														0.5	0.5			ENSDARG00000011468	FALSE	0	NA
									0.4	1	3	4	3	5	6	9	10	ENSDARG00000011473	TRUE	0.715743	CALCRLA
		0.5						0.5	0.5	0.5	1	2	3	4	12	8	8	ENSDARG00000011487	TRUE	1.09153	GNAQ
0.8	2	6	5	4	3	5	8	21	23	27	30	25	20	24	38	40	34	ENSDARG00000011488	TRUE	0.762094	SIRT2
	0.3	3	4	3	4	2		4	3	4	3	3	5	3	3	5	4	ENSDARG00000011490	TRUE	0.342568	SCUBE3
170	126	89	101	26	14	15	14	13	12	14	10	12	13	12	11	9	8	ENSDARG00000011493	TRUE	1.31582	DCUN1D3
41	50	84	79	83	62	48	44	52	44	57	59	44	48	41	45	42	38	ENSDARG00000011496	TRUE	0.275141	PPM1BB
146	119	82	65	38	10	4	4	9	9	10	9	10	12	10	11	11	9	ENSDARG00000011498	TRUE	1.35519	SI:CH211-212O1.2
228	174	100	111	34	10	9	11	15	11	11	10	7	10	8	7	7	6	ENSDARG00000011506	TRUE	1.54536	LPCAT1
383	358	310	263	209	308	324	306	316	287	262	191	166	208	151	75	57	42	ENSDARG00000011510	TRUE	0.441037	RCC2
18	22	26	39	31	17	5	4	2	1	2	2	2	2	2	4	4	4	ENSDARG00000011515	TRUE	1.14994	ORAI1A
									4	12	7	8	5	13	85	65	56	ENSDARG00000011519	TRUE	1.10403	MYL4
1	1	0.7	2	1	4	2	1	11	10	14	13	16	10	14	23	39	27	ENSDARG00000011521	TRUE	1.01527	UPB1
			0.1	22	57	54	49	30	32	40	34	31	31	25	22	23	25	ENSDARG00000011533	TRUE	0.451811	SEMA6DL
0.2	0.2	0.5	0.4	0.4	1	1	2	3	2	3	1	2	2	2	3	3	3	ENSDARG00000011537	TRUE	0.651505	UGT2A5
0.8	2	3	3	4	9	14	26	30	35	44	48	42	43	32	35	38	40	ENSDARG00000011545	TRUE	0.692801	ARRB2B
										0.8	2	2	5	5	5	5	4	ENSDARG00000011549	TRUE	0.480667	C1QL4A
30	7	16	29	25	22	24	48	142	153	183	180	179	206	201	261	271	198	ENSDARG00000011553	FALSE	0.773038	ATP5PB
49	53	35	36	49	58	40	28	29	29	27	22	20	24	19	19	19	17	ENSDARG00000011555	FALSE	0.409052	SPAG7
139	110	152	124	254	605	880	777	322	243	280	304	241	277	248	153	128	109	ENSDARG00000011564	TRUE	0.762717	SFPQ
6	13	23	20	6	2	2	3	12	13	15	14	14	19	16	12	10	10	ENSDARG00000011570	TRUE	0.520965	POU6F1
3	6	4	5	3				2		0.5	3	2	2	1	1	2	2	ENSDARG00000011571	TRUE	0.593156	CALCRLB
1	2	8	10	5	1	0.5	1	21	6	13	13	2	0.1	0.8	6	8	5	ENSDARG00000011573	TRUE	0.987396	ABCB11A
							2	76	56	40	26	24	23	26	17	12	13	ENSDARG00000011579	TRUE	0.745255	HOXB10A
0.5	0.2	0.4	0.5	0.2				0.1	0.2	0.2		0.2			2	5	7	ENSDARG00000011581	TRUE	1.64362	SI:DKEY-23K10.5
4	2	4		0.8	2	0.7	6	25	31	34	27	24	31	36	33	27	27	ENSDARG00000011582	TRUE	0.753599	SOX5
88	80	87	72	23	2	0.2	0.2	2	4	3	5	3	3	3	9	8	10	ENSDARG00000011583	TRUE	1.48597	CRY1B
129	84	106	106	114	114	132	130	109	101	93	91	86	104	72	32	26	20	ENSDARG00000011594	TRUE	0.373715	SMARCB1B
76	122	387	370	267	174	183	197	111	91	94	84	76	95	76	56	46	40	ENSDARG00000011597	TRUE	0.738371	ATXN2L
0.1	0.2	0.7	0.7	0.4	0.1	0.1		3	14	19	13	9	18	13	16	14	13	ENSDARG00000011600	TRUE	0.933539	EPHA4B
								2	1	1	3	3	7	13	20	24	23	ENSDARG00000011602	FALSE	0.975667	CRACD
184	187	125	129	59	19	14	31	16	7	8	8	5	5	7	8	6	6	ENSDARG00000011605	TRUE	1.39207	DENND6B
8	22	177	185	185	105	107	110	84	65	59	55	51	61	59	47	44	53	ENSDARG00000011609	TRUE	0.649249	SI:CH211-262E15.1
53	50	113	125	119	87	70	77	104	110	119	120	109	130	120	104	91	76	ENSDARG00000011611	TRUE	0.250101	ACTR1
35	39	64	52	96	170	196	164	101	99	103	75	66	74	58	57	59	68	ENSDARG00000011613	TRUE	0.523921	RBM39A
										1	12	30	33	47	57	48	39	ENSDARG00000011615	TRUE	0.566904	MYBPC3
0.1	1	2	2	1	2	3	7	6	6	9	12	11	7	6	10	9	7	ENSDARG00000011618	TRUE	0.665001	SLC26A2
															1	1		ENSDARG00000011635	TRUE	0	SCXB
						0.5		0.7		2	1	1	2	14	141	93	87	ENSDARG00000011640	TRUE	1.52766	SYT5B
165	234	133	144	236	475	495	499	354	377	272	245	175	178	122	76	53	44	ENSDARG00000011648	TRUE	0.619756	SNRPD1
							2	4	0.3	2	2	1	2	1	2	3	4	ENSDARG00000011652	TRUE	0.553315	FTR52P
18	25	68	75	71	80	74	70	40	28	25	22	17	17	14	33	34	26	ENSDARG00000011661	TRUE	0.59315	TWF1B
71	62	146	146	112	39	34	40	38	32	33	27	26	29	23	27	32	31	ENSDARG00000011662	TRUE	0.763059	CHUK
4	13	173	193	186	391	532	670	880	706	695	543	553	371	451	547	488	356	ENSDARG00000011665	TRUE	0.56594	ALDOAA
	1	4	5	3	2	1	2	5	3	3	2	1	0.8	1	6	9	8	ENSDARG00000011671	TRUE	0.751454	PDE6B
	0.2	0.8	0.8	0.6	0.1			9	14	12	13	12	12	18	25	23	22	ENSDARG00000011672	TRUE	0.811226	SEMA3B
63	32	10	8	4			3	21	15	21	22	18	12	16	13	9	4	ENSDARG00000011673	TRUE	0.858689	NA
224	224	145	137	151	165	122	97	104	88	61	32	23	20	14	10	9	7	ENSDARG00000011683	TRUE	0.806351	PRTFDC1B
1													1	5	33	46	38	ENSDARG00000011693	FALSE	0.994783	TTC36
1	4	3	9	2			0.5	0.4			1	0.4	0.4		1	2	0.6	ENSDARG00000011696	TRUE	1.23081	ESRRGB
	0.5			54	523	937	944	282	60	87	117	39	6	7	1	0.5		ENSDARG00000011701	TRUE	1.54659	CTSLL
1	4	10	8	3	0.8	0.9	2	1	0.9	1	1	1	2	1	4	4	5	ENSDARG00000011703	TRUE	0.945193	CLOCKA
1	3	36	40	33	20	12	7	7	8	10	10	9	10	8	8	7	5	ENSDARG00000011723	FALSE	0.883385	ZGC:56556
								8	8	12	14	12	8	13	10	6	7	ENSDARG00000011724	TRUE	0.283764	MARVELD1
4	4	4	2	3	3	6	18	36	29	26	20	17	18	20	15	14	13	ENSDARG00000011727	TRUE	0.718057	B9D1
239	220	225	188	222	295	356	317	323	267	224	169	136	159	107	79	66	55	ENSDARG00000011740	TRUE	0.446781	U2AF2B
37	57	121	109	88	52	29	23	25	15	15	10	8	11	8	10	8	6	ENSDARG00000011743	FALSE	1.03365	PIGO
52	63	125	127	119	73	55	28	32	26	24	27	21	21	18	15	12	11	ENSDARG00000011764	FALSE	0.835215	INTS13
1	2	8	4	9	15	21	26	22	17	12	12	14	9	13	15	17	20	ENSDARG00000011769	TRUE	0.523769	CPM
11	15	13	15	18	20	10	13	15	19	35	27	19	17	13	14	14	12	ENSDARG00000011770	TRUE	0.364676	DHRS12
122	138	115	106	95	55	38	32	57	52	53	58	48	48	38	47	44	29	ENSDARG00000011777	TRUE	0.517095	NA
36	41	81	71	22	10	7	8	11	10	11	10	11	14	14	18	21	21	ENSDARG00000011783	TRUE	0.923218	STAG2A
1	0.4	1	0.7	0.3	0.7	4	45	159	91	68	21	0.9	0.6	1	1	3	3	ENSDARG00000011785	TRUE	1.93644	TBX6
								2	0.8	1	3	5	6	8	13	14	12	ENSDARG00000011797	TRUE	0.777985	TENT5BB
7	7	3	3	2	3	4	6	12	11	11	7	7	9	8	7	6	5	ENSDARG00000011801	TRUE	0.447716	WARS2
4	5	12	14	8	4	2	0.3	0.2	0.2	0.3	1	0.7	0.5	1	2	4	3	ENSDARG00000011809	TRUE	1.17878	MICAL1
7	5	7	7	3	0.9											0.8		ENSDARG00000011818	TRUE	0.643631	BATF
8	7	25	32	16	5	6	10	14	11	11	9	9	12	9	10	12	14	ENSDARG00000011819	TRUE	0.545294	PCNX1
						0.1	10	79	45	40	21	13	10	13	18	16	13	ENSDARG00000011821	TRUE	0.933571	PLOD2
18	16	11	9	8	5	2	1	10	17	28	33	22	17	9	22	22	24	ENSDARG00000011824	TRUE	0.588683	PBXIP1B
2	8	28	21	5	4	4	6	8	10	9	8	9	8	8	9	7	4	ENSDARG00000011825	TRUE	0.711515	CETN3
4	6	11	14	7	2	2	3	2	2	4	4	4	4	5	9	9	7	ENSDARG00000011837	FALSE	0.621288	ZGC:100846
79	87	39	58	23	40	54	97	296	391	390	418	448	549	581	776	700	518	ENSDARG00000011841	FALSE	0.823288	ATP5L
				0.7	3	0.9	0.1	0.8	0.6	1	0.4	0.4	0.8	1	3	4	4	ENSDARG00000011845	TRUE	0.931567	CHN2
5	14	16	18	15	7	2	2	8	7	11	12	9	8	8	7	8	7	ENSDARG00000011851	TRUE	0.489237	MAP2K5
8	11	35	29	19	9	4	3	0.9	0.7	2	2	2	2	2	3	3	3	ENSDARG00000011855	TRUE	1.29835	AAK1A
6	4	13	9	9	26	36	20	5	1	1	0.5	0.9	2	2	22	47	49	ENSDARG00000011862	TRUE	1.13206	INAA
81	68	117	103	81	115	117	113	61	38	35	30	27	30	25	19	19	16	ENSDARG00000011863	TRUE	0.638357	PTK7A
								2	0.8	0.9								ENSDARG00000011869	TRUE	0.539864	GALNT8A.2
0.3	0.3	0.4				0.3	0.7	27	50	56	38	26	25	21	16	15	24	ENSDARG00000011870	TRUE	0.907205	SP8A
					7	26	47	3	3	5	10	14	17	22	21	19	18	ENSDARG00000011876	TRUE	0.733027	EDNRAA
1	2	4	4	0.7	0.3							0.2	0.9	1	0.7	0.6	2	ENSDARG00000011879	TRUE	0.907576	FOXN1
															6	14	17	ENSDARG00000011884	TRUE	0.461047	MFN1A
224	205	149	135	74	32	34	43	62	53	53	58	57	53	49	50	43	32	ENSDARG00000011885	FALSE	0.753985	MRPL19
														0.3	7	9	10	ENSDARG00000011886	TRUE	0.663924	PDCA
5	8	44	46	36	13	19	23	15	19	17	19	20	18	25	27	27	20	ENSDARG00000011890	TRUE	0.487559	CRY4
[truncated: 23,712 more rows]

## Sheet: Tissues - Transcriptome
Adrenal.gland	Appendix	Brain	Colon	Duodenum	Endometrium	Esophagus	Fallopian.tube	Fat	Gallbladder	Heart	Kidney	Liver	Lung	Lymph.node	Ovary	Pancreas	Placenta	Prostate	Rectum	Salivary.gland	Small.intestine	Smooth.muscle	Spleen	Stomach	Testis	Thyroid	Tonsil	Urinary.bladder	ids	hasParalogs	coeff.var
4.02326	2.26903	3.96993	5.64904	4.23573	4.49057	4.89288	6.05463	4.06178	4.71205	1.77821	5.74066	5.76818	3.07724	1.57531	5.23189	3.82579	4.76288	4.76022	5.40769	5.9241	3.21723	4.0197	2.94298	4.04002	5.67299	3.76871	3.06695	3.89142	TSPAN6	TRUE	0.287831
			0.0840643					2.13422									2.23879												TNMD	TRUE	0.817781
5.40327	5.11228	3.89239	5.0027	4.71699	5.20477	5.16551	4.98504	4.95931	4.66903	5.53201	4.93593	4.85748	4.84599	4.9397	4.71754	4.76818	5.19731	4.69599	5.04177	4.47249	4.70984	4.78241	4.69822	4.63923	5.22689	5.56712	5.43129	5.04089	DPM1	TRUE	0.0699991
2.1635	2.57289	1.65076	2.90111	2.33342	2.33628	2.19849	2.53854	0.722466	2.61589		2.79494	2.62059	2.15704	3.04789	1.57531	1.36737	2.44361	2.91839	2.82579	2.02503	2.34767	2.13093	2.41684	2.71809	2.45418	2.1635	2.94486	2.45418	SCYL3	TRUE	0.222091
0.0840643	1.16993		1.4957		1.20789												0.0976108	0.704872							1.9486		2		C1orf112	FALSE	0.68526
2.20789	6.14568		1.49057	0.613532	1.0635	0.895303		5.29939	1.68257		0.333424	2.43563	4.84197	4.32048		1.57046	2.3505	0.765535	1.09761		1.39506	1.95977	5.46107	0.124328	0.464668		3.49953	3.37295	FGR	TRUE	0.776874
5.14445	4.86987	0.400538	5.26754	4.07039	3.7866	5.94181	1.68706	6.20809	6.68692	5.25248	4.15137	9.65105	5.31179	3.56803	6.64818	2.98914	4.75702	3.23573	4.94392	3.23266	5.11977	4.45154	3.28836	5.58286	3.92315	2.72901	3.58135	6.33878	CFH	TRUE	0.382613
4.75382	4.24413	2.75489	5.43196	5.01436	4.62761	3.86987	4.25776	4.0197	4.58135	4.32265	5.43696	4.88118	4.62819	3.18428	4.17073	4.12267	5.31252	4.43696	5.04701	3.11603	4.94064	4.29646	4.01614	4.93593	3.60644	4.55336	3.76022	4.58616	FUCA2	TRUE	0.152806
3.5008	2.87381	4.56133	4.05224	4.8475	4.32769	4.7939	5.45648	4.05832	3.39643	3.35191	4.18903	5.85	2.89724	2.848	1.72247	2.56071	2.35896	3.53854	3.97453	1.84398	4.27947	3.29572	3.86394	4.14241	3.5435	3.53978	3.81044	4.18666	GCLC	FALSE	0.258173
2.75916	3.51475	3.89821	3.37295	2.93357	3.63807	2.926	3.34625	3.38543	3.08746	2.01078	3.07553	2.86394	3.22188	4.16832	3.488	1.63691	3.31615	3.50335	3.62644	2.7137	3.12102	3.36597	3.42492	3.43296	4.84549	3.69711	3.97636	3.0993	NFYA	FALSE	0.183486
1.72683	0.948601	1.23266	2.62059	1.23266	2.07039	1.17632	4.25852	0.85599	1.86394		1.23266		1.78241	0.85599	1.02148		0.454176	1.7137	2.03914	0.895303	1.66448	1.98914	0.713696	1.91839	3.81558	1.26903	1.19535	0.895303	STPG1	TRUE	0.556007
2.91648	2.64847	4.52795	3.70819	3.32481	2.58736	3.51349	3.99005	2.03562	3.48285	2.80323	3.66221		3.60526	3.61589	2.87184	2.97453	1.98914	5.97659	3.67356	3.32193	3.39232	3.08746	2.53605	3.92979	1.87578	4.87823	3.28392	3.07382	NIPAL3	TRUE	0.260691
3.44626	3.72901	4.77821	3.59455	3.14405	3.65878	3.73552	4.4957	3.56803	3.28688	2.854	3.64847	3.54597	3.60288	3.94205	3.92884	2.48285	3.52356	3.9486	3.66334	3.76022	3.13586	4.42223	4.09677	3.20006	4.50779	3.31179	4.14568	3.2555	LAS1L	FALSE	0.138516
3.5741	2.65764	3.83086	3.38957	3.07895	2.45418	2.45418	3.85499	3.17473	2.57046	3.31904	4.09001	2.22959	4.0009	2.72683	1	2.72901	2.38128	3.67016	3.47119	3.44626	3.01614	1.63691	3.4019	3.22033	3.35755	3.31615	2.37016	2.77821	ENPP4	TRUE	0.234013
1.65076	2.61589		1.5509	3.36317	2.90689	4.79546	4.27501	3.02148	3.4957	2.41684	2.27798		4.32121		0.903038		3.95884	3.68482	1.08406	2.95606	3.25701	3.0197	4.26003	3.47897		3.99277	2.7845	3.90881	SEMA3F	TRUE	0.337867
	1.39506		4.91886	4.78293			1.15704		5.32876				2.88557			6.8525		0.286881	5.32589	2.07039	4.82528	2.26604		2.23573				0.0976108	CFTR	TRUE	0.67246
3.65421	3.20789	4.55582	3.26303	3.26003	3.69933	3.5741	3.1635	3.16993	3.65535	2.926	4.62877	2.70487	3.02148	3.7126	3.33485	2.62994	3.35896	3.17153	3.5472	3.45812	3.42626	3.51854	3.34908	3.38128	4.1375	3.81865	3.25701	3.44493	ANKIB1	TRUE	0.129576
5.41075	3.68594	4.83744	5.1981	4.22188	4.06437	4.39849	2.86196	3.68482	2.9279	3.07039	4.22805	5.66789	5.18785	2.46467	3.70598	4.25399	2.99639	4.83592	4.12598	2.926	4.23573	3.06523	2.66676	5.14119	5.6453	4.13586	3.26754	3.05658	CYP51A1	FALSE	0.239275
3.0321	3.53356	3.97636	3.03914	3.77716	3.75382	3.11437	3.58856	2.774	3.70929	3.23726	3.48671	3.07382	2.88362	3.18903	3.81865	2.1635	3.15866	3.22033	3.6311	3.36457	2.9279	3.70708	3.20945	3.71039	4.59753	4.46074	3.57168	3.46205	KRIT1	TRUE	0.144316
0.176323	0.333424	1.91456	2.14405	1.96717	1.29278	0.475085	1.37851	0.250962	0.650765		1.01436	0.565597	1.51096	1.46467	2.45418		0.887525	1.95606	2.09424		2.12763	1.28688	2.12102	1.83996	0.722466	1.41684	1.12433	1.29866	RAD52	FALSE	0.505066
4.07895	2.83996	3.69042	3.01436	4.21878	3.86394	3.0993	4.24413	3.20789	4.42156	4.17233	2.14078	3.31904	4.19849	2.62059	3.76447	4.1127	4.32481	4.77505	2.63227	5.05658	3.85898	3.24945	3.30743	4.41007	3.56071	3.05137	2.40871	3.56803	BAD	FALSE	0.200695
5.81737	7.10727	4.96209	5.87799	6.01302	5.17113	5.22226	5.54874	5.97085	5.5404	5.55428	6.08661	6.83681	6.55444	6.20633	4.24184	4.08491	5.7137	4.90304	5.29976	6.20672	5.43329	4.99639	6.46238	5.31868	5.41819	4.89579	6.19535	5.72901	LAP3	TRUE	0.124037
6.03804	6.72765	6.34252	7.1641	6.86864	7.40071	7.25758	6.45401	7.58383	8.2213	7.09782	4.73715	6.49362	7.10297	6.28374	7.65507	6.86505	7.35306	7.80213	6.91648	5.47281	6.9939	7.25824	6.73755	6.8786	7.55911	4.99503	6.52168	7.62768	CD99	TRUE	0.116135
					0.613532	0.739848			2.35896						3.14568									0.650765				1.87184	HS3ST1	TRUE	0.679623
	2.04614		6.08087	7.13873					1.44361		6.78607	0.495695					9.84307		5.3837		7.47581	2.95233		4.62176			0.62293	0.201634	AOC1	TRUE	0.743999
														0.214125			0.0285692												WNT16	TRUE	1.08126
		1.926									2.65764																		HECW1	TRUE	0.225737
1.61353	2.95977	2.4957	1.80735	2.16672	2.96717	2.04614	3.09592	1.5008	2.85599	2.488	1.15704	3.02326	2.69599	3.80941	2.21723	1.45418	2.02503	2.62994	0.678072	2.1177	2.40871	2.81352	3.53978	2.50335	3.24184	1.94486	2.86987	2.87971	MAD1L1	FALSE	0.296221
4.75007	5.78712	5.15704	6.41312	6.60526	5.1127	4.75489	4.64962	5.91145	5.7845	3.51475	5.07082	4.93593	5.81762	5.67892	5.34589	4.63517	6.29664	4.24489	5.89482	4.34056	6.92065	5.1469	5.91073	6.27929	3.90689	3.91552	5.83061	5.24641	LASP1	TRUE	0.161664
2.71809	3.58616	3.15866	3.35755	2.40327	3.16832	4.03738	2.45681	3.10769	2.7866	2.36457	3.20163	2.34483	3.44361	3.83592	2.55827	2.14078	3.29131	2.39232	3.20006	3.11603	2.49313	2.86196	3.67356	2.63227	3.44758	3.90785	4.62877	3.05137	SNX11	TRUE	0.193454
4.53169	6.68103	3.853	7.502	6.45401	3.64847	5.22033	2.0321	6.69167	7.29875	4.85	7.91916	9.01848	5.24982	5.58195	6.02791	2.99277	5.21684	1.46467	6.52701	1.87971	6.72096	4.29646	5.20828	5.4165	2.46989		5.6585	6.49346	TMEM176A	TRUE	0.361995
5.62234	6.42945	5.30342	6.07639	5.37121	5.50589	5.39403	5.87603	5.77505	6.0974	6.22072	5.93664	5.19889	6.13052	6.4348	5.02591	4.49697	5.51096	5.48736	5.9486	5.47184	5.47476	5.93475	6.41633	5.64068	5.82018	6.07874	6.26021	5.76049	M6PR	FALSE	0.0784996
2.56803	0.722466	1.64155	1.32769	1.40054	5.08236	2.51602	2.91839	1.22651	1.97453	2.51349	3.55704	0.83996	0.333424		2.774			1.5509	2.43296		1.50589	5.09297			2.46989			2.87184	KLHL13	TRUE	0.555591
0.594549		2.06005				1.16993		3.41278	0.0143553				1.40054	1.79909	1.66448		1.78241		0.604071		1.40054		0.176323		3.59694	1.72683	0.0285692	0	CYP26B1	TRUE	0.825297
2.82375	1.69599	2.43029	5.03958	3.74953	2.89724	0.584963	3.79701	3.82375	3.65076	5.13955	3.6565	2.74201	3.25399	2.58976		4.50271	3.08066	4.55459	3.99458	4.80993	3.45418	2.5008	2.41143	4.93876	4.87283	3.65535	2.70487	2.74846	ICA1	TRUE	0.317323
2.3978		2.57046		0.400538	0.594549	2.89724	1.27501		2.20789	1.70044	1.29866		1.32769	2.22959	1.28096	2.854		2.26303		2.94111				2.0321			1.48027		DBNDD1	TRUE	0.415857
2.08406	1.91073	3.04789	1.9222	2.67807	2.7137	2.08746	2.52607	2.51096	2.47249	3.81558	2.926	3.22651	2.73552	1.79494	2.25701		2.50589	2.39506	2.44095	0.847997	2.82985	2.75489	2.20163	2.66676	2.82579	2.64847	1.88362	2.40871	ALS2	TRUE	0.220205
	2.51854		3.15218	3.85499	1.26303	2.34483	2.24793	2.31034	2.73985	0.575312	1.852	0.722466	3.2854	2.96901			2.80529		3.40871		3.79805	1.96347	3.65076	3.03386		0.0840643	2.90111	3.08236	CASP10	TRUE	0.421254
5.34483	6.39849	2.9782	5.10811	5.03694	4.43896	5.50335	4.51538	6.24203	5.14527	5.99503	5.43329	4.82426	5.63343	5.74524	3.94392	3.9542	6.04418	5.21762	5.37608	4.93263	5.36842	5.44956	5.7385	5.20477	4.40327	5.18428	6.08108	5.23496	CFLAR	TRUE	0.144335
3.60526	3.95977	2.12102	4.82069	5.51128	3.97453	5.22149	3.44758	6.09381	6.0505	4.02414	5.99481	7.69759	6.60481	4.68426	4.64674	2.67129	7.3267	3.35896	4.57471		5.59365	4.7761	4.0072	4.04876	2.97269	3.23113	4.07639	6.23764	TFPI	TRUE	0.29696
3.18428	1.89918	1.67807	2.28096	1.87578	2.34767	1.79909	1.45418	1.37851	2.37573	3.7761	3.13093	2.88557	1.72247	1.99277	1.59932		1.68706	1.76553	2.83188	1.05658	2.854	3.22959	1.88753	1.75275	4.6427	1.81967	2.52857	2.47508	NDUFAF7	FALSE	0.351585
4.83845	5.36001	5.52826	5.29315	4.93026	5.39712	4.80993	5.76686	5.00988	5.30925	4.29057	4.95513	4.1334	4.9905	5.91456	5.63691	4.72083	5.33092	5.77162	5.70266	5.06091	5.25134	6.02636	5.61412	5.42324	5.49089	5.32301	5.88947	5.21335	RBM5	TRUE	0.0865678
0.948601		3.0197																								2.11437			MTMR7	TRUE	0.512082
2.51349	1.46989	1.51096	2.33342	0.650765	3.45154	2.97269	5.7057	3.92315	3.49313	2.3978	2.97636	6.60229	1.79077	1.52105	5.17911	5.89312	3.1811	3.65306	2.40871	2.30743		2.20163	0.495695	3.09761	3.97085	6.39609	0.678072	2.35896	SLC7A2	TRUE	0.551528
5.67497	5.58015	5.49121	5.28429	6.16812	6.40361	6.57365	6.26153	5.82604	6.47021	6.60288	4.33199	5.81455	6.02813	5.76792	5.56255	6.4733	5.75435	6.16651	4.80839	5.47606	6.08683	5.23151	5.71094	6.11956	5.39678	5.26791	5.10978	6.32012	ARF5	TRUE	0.0951047
1.48543	0.15056	2.25701	1.42761	2.53605	0.286881		1		0.0565835		1.57046			0.31034				1.80735	0.765535		3.32481	2.03914	0.910733	1.12433		0.0285692			SARM1	FALSE	0.76655
6.06738	4.82985	5.32984	5.94392	5.32589	5.09972	5.40905	5.23419	4.93829	4.97269	6.50573	6.29205	6.72137	4.92505	4.35191	4.82528	5.41752	4.44956	5.18943	5.43496	5.30305	5.05398	5.08576	4.63749	4.94205	5.40293	5.30012	5.3194	5.05788	POLDIP2	TRUE	0.105706
4.70929	5.3194	4.02857	4.2555	2.49313	5.28983	4.79805	3.67129	6.45236	5.60407	4.80839	4.46989	4.22033	5.97269	5.09635	4.28614	2.63227	6.87246	3.94392	3.7939	2.68706	2.5509	5.43496	5.24527	3.98185	4.10518	4.50589	3.99186	5.78738	PLXND1	TRUE	0.247384
6.84699	5.54782	4.82833	6.89772	6.3637	5.47054	5.26716	6.99356	5.37573	5.26828	6.22516	7.02425	6.55628	5.30852	5.31397	6.08576	4.64847	5.29902	5.98573	6.20574	5.31143	6.16932	6.87381	5.16148	5.43329	4.79338	5.69766	6.37695	7.13453	AK2	TRUE	0.126676
2.88557	3.93168	4.94064	1.19535	2.43296			1.46467	2.36457	1.44361			0.739848	2.04614	3.65878				4.38957	1.71809		2.35614		3.87774	0.475085			4.43363	4.03914	CD38	TRUE	0.513368
4.40871	3.93357	4.46793	5.03826	3.89918	5.12763	4.69042	5.12557	2.9855	3.91648	3.77294	5.16872	4.52857	3.68482	3.05137	4.20398	4.31976	4.50589	5.19495	4.69655	4.96947	4.40463	4.54226	3.18428	4.0045	5.38301	4.75007	4.38128	4.02148	FKBP4	TRUE	0.147212
4.26003	4.24336	4.07382	4.99594	4.29646	4.87725	4.20242	4.9528	3.69933	4.58376	3.94767	4.63633	3.46989	3.96809	4.11603	4.75756	3.71039	4.59216	4.89579	4.77979	3.68032	4.13422	4.80787	3.93168	4.18903	5.89433	4.36036	4.92884	4.12019	KDM1A	TRUE	0.119175
5.44195	6.0691	6.34465	5.77531	5.80142	5.48382	5.31723	5.53574	5.09212	5.86641	4.98322	5.40224	4.1177	5.43095	6.51159	5.23189	4.71864	4.80012	6.13196	6.85037	5.04177	5.93711	6.65378	6.33092	5.67864	5.7447	5.55643	6.25437	5.64184	RBM6	TRUE	0.109167
2.79701	1.76129	3.51096	1.0635	0.545968	1.79494	1.18903	0.765535	2.21412	1.83188	0.863938			1.5008	0.545968	2.25701	1.82782	0.757023	1.852	0.584963	3.49057	0.475085	2.56071	1.87971	0.903038	2.57289	1	0.201634	3.05832	CAMKK1	TRUE	0.585925
4.24336	5.05745	3.20789	3.80426	3.25852	4.81506	4.18824	3.68818	4.28836	4.04264	4.33414	3.60407	2.59216	4.47249	5.26754	3.55582	1.82782	4.09001	3.45418	3.9982	2.88557	3.57894	4.24945	4.66676	3.34625	3.65191	3.65306	4.95606	4.78712	RECQL	TRUE	0.196033
2.95791	2.54597	3.24489	2.82985	2.35614	2.78031	2.848	2.54597	2.05658	2.32193	2.55827	3.51475	2.29572	2.80529	2.8953	2.48543	1.7137	2.24489	2.44361	3.12763	2.36177	2.53107	2.95047	2.6893	3.05311	3.09085	3.21878	2.8953	2.73769	VPS50	FALSE	0.145393
6.66292	4.74039	2.13093	4.18269	4.95977	5.38785	6.58571	4.29205	7.19928	6.56651	9.46761	2.76765	1.11103	4.66221	2.03914	7.01692	3.96347	5.33307	6.1641	6.80077	3.7148	1.81967	6.51175	2.7866	4.40871	5.32409		0.0703893	7.73091	HSPB6	TRUE	0.458951
1.20163	0.687061	3.37434			1.4489		0		1.9222					1.53605	2.22342			2.24793		1.38957	0.687061	1.18269	1.9486	2.51602	2.71809				ARHGAP33	TRUE	0.525813
5.79286	5.05094	5.21723	6.27053	6.13648	5.14119	4.98413	5.52231	4.81404	4.64212	7.4793	5.69098	5.63401	5.09001	4.33557	4.22033	4.9279	5.02059	5.19259	6.0781	5.56499	5.85574	4.74739	4.78503	4.75862	5.19731	5.08364	5.47444	4.95931	NDUFAB1	TRUE	0.124727
7.0955	4.95233	3.61706	6.58301	6.18329	4.81301	6.26003	5.03386	7.69801	5.58256	4.33985	6.29646	6.32715	4.854	4.67525	6.17313	8.47638	5.48478	3.44626	6.66221	2.41684	6.11562	6.39832	5.13545	5.24755	3.60881	5.14731	2.77189	5.36107	PDK4	TRUE	0.258268
	0.432959																					1.57531			3.25096				SLC22A16	TRUE	0.808513
					2.26303		7.3419						1.87184												6.44741				ZMYND10	TRUE	0.628279
									0.238787																				ABCB5	TRUE
		0.367371													4.67638									2.61117	1.65076				ARX	TRUE	0.780764
3.34056	3.38543	3.1375	4.13586	4.22342	3.05658	3.02503	3.42761	2.91265	3.0197	2.02148	4.93168	7.06652	2.40599	2.80941	2.28096	2.74416	3.64731	3.07553	3.56071	2.43563	3.68594	2.71809	3.17632	3.64847	3.40871	3.91456	3.15381	3.23879	SLC25A13	TRUE	0.279329
3.7845	2.53107	3.74524	3.26454	3.19535	3.03914	2.89724	4.15381	2.57531	3.29719	2.94298	4.85997	4.52795	4.3512	1.77821	3.24489	3.82273	3.72247	3.46728	3.47768	3.6837	2.96347	3.57773	2.74631	3.488	2.69377	4.30086	2.6017	3.29866	ST7	TRUE	0.200584
3.97085	3.8125	3.94953	4.00809	3.14241	4.45483	4.18507	3.89239	4.64731	3.96532	3.52607	3.87676	3.44361	4.04089	3.8679	3.55213	2.03914	4.33842	3.20163	4.13586	3.06178	3.04089	4.10601	4.20477	3.59694	4.44427	4.81096	4.57168	4.15704	CDC27	TRUE	0.150875
											4.53232						2.32193												SLC4A1	TRUE	0.456062
											0.367371																		CALCR	TRUE
3.87283	3.70377	2.82782	4.50589	4.41752	3.15381	3.80012	3.34625	3.32481	3.56438	5.07553	3.95327	3.43296	3.25399	3.42626	2.74201	1.81147	3.45286	2.774	3.92125	3.4019	4.03034	3.06867	3.47379	3.6241	3.72028	3.44758	3.99729	3.64847	HCCS	FALSE	0.171994
3.37295	3.08746	3.76977	2.8339	3.23726	4.39163	4.06695	3.26903	2.43563	4.14486	2.86196	1.84398	1.07039	3.42358	3.85699	4.73118	1.9782	3.488	4.1152	2.58496	3.4019	2.83592	3.86691	3.51475	3.27202	3.45681	3.1811	2.68257	3.85898	DVL2	TRUE	0.243207
						4.81865	1.38957		3.14568				1.65992				2.08406	2.79286		2.86592				1.28096			2.82782	3.11603	PRSS22	TRUE	0.405733
3.9982	4.03914	3.66789	2.9982	4.11103	3.99639	3.80116	3.96717	3.72465	4.32481	3.47508	3.07039	3.18903	3.6837	4.27873	4.21179	4.73823	4.2765	4.59991	2.66221	4.71918	3.86888	3.52732	4.06091	4.06523	4.45483	3.54844	3.03562	3.91648	UPF1	TRUE	0.135819
4.40599	4.87135	2.33342	4.47184	3.60288	2.13093	3.67694	3.88947	4.68089	3.36597	0.823749	4.49697	2.62994	4.50906	4.20163	3.853	1.43829	2.93734	2.81147	4.28021	1.57046	3.51728	2.76553	4.89772	3.88947	3.66676	2.63227	4.69042	4.09001	SKAP2	TRUE	0.314102
6.6343	7.19032	6.43379	9.12267	9.4142	6.91779	7.77426	6.32966	6.57228	6.67285	7.62585	8.52384	7.99678	7.13986	6.90821	5.8885	8.37808	6.39917	6.4165	8.3447	7.25437	8.99862	7.00776	6.72247	7.30305	6.10852	7.54404	8.06043	7.23113	SLC25A5	TRUE	0.127817
1.38405	4.12763	0.669027	2.32769	1.66903	2.16027	2.25399	0.739848	3.25399	2.7761	0.895303			2.8953	4.49633	2.39232		2.09424	0.594549	2.42492		1.91839	2.78241	3.59096	1.83996	2.0036	0.356144	4.4121	2.83188	CCDC109B	FALSE	0.505911
			2.26903		6.2426						1.61353						2.70487	3.42223	2.29572			6.16169						2.32193	HOXA11	TRUE	0.536917
4.9991	4.21723	4.2817	4.58195	4.35896	4.26303	3.84699	4.46923	3.72683	4.96625	5.97865	3.29866	4.83491	4.61706	4.27724	4.35966	4.774	4.00988	4.51096	3.94953	4.55827	4.45746	3.78869	4.33557	4.28614	4.58376	4.07296	4.3427	3.9855	POLR2J	TRUE	0.112091
1.63227	2.52356	2.95606	2.08746	1.61824	2.56316	1.96717	2.18903	2.4957	1.63227	1.35614	1.94111	2.08066	1.94111	1.926	1.85599	1.69153	2.16672	2.06005	2.06005	1.76977	1.42761	2.49313	1.91839	1.78241	2.26303	2.05311	2.30451	1.64616	DHX33	TRUE	0.18192
	1.56071		0.298658		1.1635	1.57046		3.23726	3.45549	3.58856			0.0143553	3.12763								0.176323	3.55949		1.42223		2.12433	3.46336	MEOX1	TRUE	0.655351
		2.04963			1.02148			0.321928	1.31034		3.18903		0		0.948601		1.30451	0.443607				1.15056						0.485427	THSD7A	TRUE	0.8051
2.44626	2.47249	2.52857	3.0321	2.3505	3.46467	2.78869	3.54844	1.43829	1.79909	1.30451	2.89336	2.02857	2.12102	2.44361	2.7845	1.65535	2.58976	2.96162	2.6893	2.95606	1.91456	3.10434	2.47249	2.42761	3.85499	2.7866	2.69822	2.78869	LIG3	TRUE	0.231846
3.43029	4.28021	3.02326	3.0321	3.66448	4.15137	3.59216	4.16027	2.72028	3.13258	3.65191	3.53356	3.10434	3.30451	4.09255	3.64386	1.42761	3.42895	3.38819	3.54597	2.73985	3.48671	3.50589	3.65421	3.27798	4.06437	3.61706	4.64097	3.55949	RPAP3	TRUE	0.170789
0.137504			4.42425	2.68257	1.54102		4.32193		3.01257	0.948601	5.90304	6.8268	1.46467		4.91169	3.9607		4.63575	3.8166	0.659925	2.07724	2.98914		3.66676	2.40599		0.263034		ACSM3	TRUE	0.616241
			0.0565835	0.189034		0.163499	1.24489			0.773996			0.0426443					2.45943	0.111031						7.04658				AC004381.6	FALSE	1.69984
3.90593	3.65306	3.9222	4.43962	3.80735	3.64039	3.85	3.5741	3.32625	3.53356	4.32625	4.28244	3.39917	4.11686	3.37295	2.56316	1.57531	4.04439	3.45418	4.03034	2.96717	3.68594	3.5435	3.13258	3.10769	5.33628	3.65878	4.5097	3.62527	CIAPIN1	FALSE	0.182902
3.06867	3.38267	3.62293	2.5008	4.96717	2.76765	1.8679	3.13258	1.62761	3.8748	0.871844			2.75275	3.79181	2.60881	4.44095	3.28244	3.97911	2.70266	3.82985	4.90159	2.33628	3.89045	4.85947	4.01078	1.75275	2.11103	2.41684	SPPL2B	TRUE	0.335441
2.66903	3.09255	3.01614	3.07553	2.74631	2.37573	3.58135	1.26903	3.54967	3.42223	3.50716	1.96347	0.823749	3.47897	2.11437	2.4489	1.36177	3.00899	2.46989	3.18903		2.68482	2.91265	3.40599	2.67807	2.22959	1.83592	1.87578	3.24945	FAM214B	TRUE	0.280788
4.28466	2.75489	2.22959	3.08406	1.99639	4.45812	4.50843	1.17632	5.16269	4.57168	5.55275	3.80323	4.18745	3.7866	1.60881	2.22959	4.07296	4.31832	4.09085	4.7301	3.57289	1.18903	4.92029	2.68032	1.93734	3.68257	4.19377	2.81558	4.68594	COPZ2	TRUE	0.348159
5.50303	3.17153	3.64962	3.40054	2.61824	3.47768	4.69098	1.58015	7.09276	2.79909	4.18982	3.47119	0.516015	1.82375	2.21723	5.66107	3.57652	4.29131	2.83592	4.03562	3.91648	2.40327	3.21101	4.57107	3.70819	4.97545		2.80323	3.81967	PRKAR2B	TRUE	0.375507
3.29131	4.95838	3.23419	3.33628	3.04264	3.28244	3.35755	3.45943	3.60999	3.34908	2.43829	2.31325	1.97453	3.39643	5.16912	2.85599		3.19377	2.93734	3.64155	2.34199	3.1127	3.11103	4.78031	3.30743	4.14649	2.99277	4.76394	3.7845	MSL3	TRUE	0.229787
3.21878	3.80426	3.82477	3.42761	3.01078	4.33985	3.68257	3.96255	3.67694	3.68032	2.37295	3.78764	2.26303	3.22805	4.08576	4.86196	3.38128	3.53481	3.30012	3.61706	3.5435	3.42223	4.55459	3.93168	3.56071	4.55336	3.50462	3.77189	3.51728	CREBBP	TRUE	0.153568
3.1127	2.25701	4.99005	1.7137	1.45418	2.95233	2.36737	4.5292		3.39643	2.25399	1.70929		2.56316	3.53107	4.61117	3.62293		4.53356	2.39506	3.74953	2.20163	3.84097	4.05572	3.43429		2.48543	1.73985	2.30451	BZRAP1	FALSE	0.339171
																	0.333424			3.488			0.378512						MPO	TRUE	1.29175
0.31034												9.32145																	PON1	TRUE	1.32308
1.81147	2.72683		2.65306	1.72683	2.83996	3.01078	3.13258	1.79909	1.97085	1.94486	3.23879	3.57652	3.51096	2.39506	2.56071	1.52105	2.30743	3.53107	1.41684	2.04264	2.32481	2.45154	2.36737	2.79286	3.57046	3.1635	3.10434	2.16672	GCFC2	TRUE	0.252622
2.50335	2.34767	2.13422	1.37295	0.85599	3.16993	1.05658	6.36457	1.43296	3.58976	1.31615	2.63459		2.7761	2.86592	2.774	2.0036	2.54102	2.08746	1.41143	1.28096	1.36177	2.96347	2.9782	2.93168	3.40327	2.18269	3.04439	2.1635	WDR54	TRUE	0.449536
2.95977	2.27501	2.17313	3.38405	4.78398	2.76341	3.46205	3.34199	1.19535	3.6017	1.7866	4.0072	4.77558	2.25399	2.08406	2.7137		3.68818	4.1035	3.05311	1.72247	5.05268	2.83188	1.98185	2.41954	2.48543	4.72192	2.78241	3.65992	CROT	TRUE	0.332283
2.27202										1.40599		5.5008		2.26604									1.64616				1.96347		ABCB4	TRUE	0.599812
3.42626	4.52795	4.64616	4.70653	4.00899	4.58015	4.05224	4.40531	4.44228	4.04876	2.94673	4.22651	2.8953	3.89433	5.12928	5.09212	3.0197	4.1416	4.04002	4.76713	3.82375	4.19771	4.91121	4.81711	4.6792	4.49953	4.31252	4.51349	4.33342	KMT2E	TRUE	0.138518
6.62936	4.45878	5.74551	3.99639	4.98094	4.50526	4.14405	6.00585	4.62994	5.36737	4.69209	4.48736	4.22188	5.88411	3.9279	4.52607	5.03474	4.19771	5.32373	3.80941	5.05268	4.94533	4.10098	4.44427	5.20477	4.94767	5.73606	3.36036	4.60348	RHBDD2	TRUE	0.154549
		6.79948						0.0426443						0.475085						1.20163					0.713696		0.367371		SOX8	TRUE	1.61026
4.69153	3.86394	3.28244	3.65191	3.61235	3.79077	3.7126	4.2426	3.1375	2.9279	3.53854	4.21723	4.51412	3.63575	3.39232	3.67016	3.09255	3.34625	3.52857	3.67016	3.64039	3.851	3.30597	3.1811	4.05832	3.22497	4.18349	3.47508	3.60051	IBTK	FALSE	0.115967
1.53605	2.25399	3.49953	3.40463	2.46205	2.76553	0.83996	2.91073	2.09761	1.77821	1.58015	2.90881		2.69153	2.9486	0.678072		1.75702	2.73769	3.35614	2.0036	2.59932	2.37851	2.94111	2.89336	1.86394	3.30305	3.40054	2.21101	ZNF195	TRUE	0.310167
3.41819	4.1811	3.9607	3.56071	2.93168	3.44493	3.73335	2.76129	4.04876	3.69042	3.25852	4.03914	3.37434	3.52105	4.94158	4.34199	2.65076	3.32048	3.83491	4.1914	3.51223	2.67582	3.7126	4.852	3.03562	3.74416	3.29866	5.05224	3.25248	MYCBP2	TRUE	0.170749
4.33056	4.14078	4.26679	4.19849	4.14486	4.68313	4.55766	4.46597	4.58376	4.08746	3.76447	4.89772	3.63807	4.59813	4.53978	4.83643	3.29572	4.65076	4.50208	4.54659	3.76235	4.03826	4.54844	4.36457	3.97728	5.00315	4.80735	4.49506	4.20789	FBXL3	TRUE	0.0918162
2.26604	5.40905		2.53605	2.1177	1.24489	1.0635	1.65076	2.39506	3.1811			3.12267	4.03826	6.17493	0.823749		1.83592	0.378512	2.63459		4.15462	0.286881	6.12039	2.48285			5.45648	3.07724	ITGAL	TRUE	0.618917
5.06178	1.98914	4.46793	4.37434	4.49378	3.7137	4.06523	3.93263	4.6153	4.49442	5.50938	5.78555	5.49697	3.31179	3.41007	5.29241	4.81865	3.67582	3.12433	4.3067	3.94673	4.67976	5.32912	3.74416	4.23419	3.54226	4.04177	2.75702	4.33128	PDK2	TRUE	0.205249
3.86295	2.36457	1.81558	3.6893	4.53854	3.22497	3.46074	4.59276	1.60881	5.16551	2.66903	3.39506		6.0398	3.30159	3.53854	2.88753	4.80632	3.18587	3.42223	2.41143	4.55827	3.57168	3.44361	4.50208	0.807355	4.18587	1.64616	4.38888	ITGA3	TRUE	0.340384
2.80323	2.50589	3.40327	1.76553	2.52356	3.56194	2.94486	3.58496	3.83794	2.47768	2.28392	3.32337	3.02857	2.60881	3.98368	3.78346		3.32193	4.19377	2.48285	1.91073	2.27501	4.30012	3.91839	2.68257	2.48285	3.46728	2.42761	2.25096	ZFX	TRUE	0.237075
6.13504	5.60407	6.58496	5.81506	5.75542	6.07682	6.14507	5.88996	6.20261	6.77386	5.13545	7.1811	7.58436	6.00203	5.16631	5.73552	5.5373	6.22265	6.99887	5.42391	6.94521	5.98914	5.60881	5.50684	6.17293	5.60377	6.87123	5.35614	5.90881	LAMP2	TRUE	0.102518
		0.565597			1.46989									0.799087			0.356144												ITGA2B	TRUE	0.605858
4.69153																													ASB4	TRUE
4.60407	3.84197	4.53978	5.61736	4.82222	4.39438	4.58676	4.37434	3.99367	4.43429	5.11645	4.71205	4.48993	4.71644	3.27352	3.38957	3.69042	4.16591	4.75916	5.58105	4.71534	4.81916	4.67638	3.45681	4.47119	3.91552	4.59574	3.904	4.74846	GDE1	TRUE	0.129387
1.43296	1.98185	0.790772		1.91456			0.333424		2.12102	1.40054			2.40599	1.5656	1.79909		1.60881	2.65535	0.659925	3.2555	2.4957	1.33342	2.54102	0.367371	0.367371		0.367371	0.0703893	C19orf60	FALSE	0.610025
0.526069		3.39369				2.13093	0.536053	1.54597	1.48027	1.62293			0.669027				4.62352					0.650765						1.25096	CRLF1	TRUE	0.772932
0.565597	1.67356	2.77189	2.88947	4.63517	1.94486	0.475085	1.56071	0.163499	2.74201	1.05658	0.176323		2.50589	2.54597	2.05658	2.11103	0.847997	3.12763	2.65076	2.58496	5.28207	2.14731	2.76553	5.37747		1.1177	1.09761	1.81967	OSBPL7	TRUE	0.629498
4.21645	2.62527	4.8485	6.11103	5.91886	6.30907	4.35544	5.77109	3.94486	6.23036	3.48156	4.37295	2.72683	5.27947	1.48027	6.97659	5.12184	4.39712	6.19081	5.69042	4.70377	5.96255	5.97797	3.57168	6.45335	4.53667	4.93687	1.89142	5.17991	TMEM98	FALSE	0.292174
			0.956057		0.925999																1.3505				7.01436				YBX2	TRUE	1.16121
2.34199	3.41007	1.05658	1.82375	2.79494	1.66448	1.89918	2.13422	1.89142	2.66676	2.22033	0.389567	0.545968	2.13422	4.22728	2.28983	2.34483	1.52105	1.91456	2.26903	2.72465	3.23113	2.14731	3.60526	2.36177	2.30451		3.22497	3.02857	MAP3K14	TRUE	0.371218
2.96162		3.47638														4.26454		1.774						0.111031		2.26303			ABCC8	TRUE	0.587343
0.454176		3.07382																											CACNG3	TRUE	1.0501
0.250962	2.21101	4.62293			3.18428				2.28096				1.75702		2.51349		4.22959	1.64616		3.76871		0.344828			1.07724		0.238787	0.0426443	TMEM132A	TRUE	0.761702
5.17233	4.97361	6.30561	6.11603	4.78084	5.25965	4.42223	5.50589	5.17073	5.03958	5.19928	6.20789	4.41346	5.25134	5.13873	5.48832	3.75168	5.60466	4.94813	5.7301	4.04089	4.76447	5.28096	5.0648	5.27724	6.10894	5.77531	5.2114	5.04002	AP2B1	TRUE	0.11527
1.21412	2.11103	2.13093	1.08406	2.85				1.93734	2.27798										2.20163	3.13422	1.85997	0.62293	5.15785						TAC1	FALSE	0.526265
3.73118	3.851	4.20085	3.72465	3.70377	3.80219	3.26003	4.48671	4.12019	3.90497	1.82782	3.73877	2.73552	3.85599	4.21335	4.33842	2.93546	3.75489	4.09085	3.98094	3.30889	3.17313	4.24489	4.09424	4.01614	4.15137	3.7761	3.95884	3.848	ZNF263	TRUE	0.14655
1.74416	2.57289	5.12226	1.9782	1.89918	3.02148	3.18745	1.18269	4.36807	4.9279	3.17153	3.75382	1.78241	6.01992	3.10266	2.45943	2.63923	2.80941	3.92884	2.67129	4.91552	1.87971	3.51728	0.687061	2.09085	2.38957	3.24793	1.35614	4.45088	CX3CL1	TRUE	0.431069
4.59455	3.02326	2.12433	3.26153	3.76553	4.43095	3.66334	3.89336	3.37434	4.916	5.19653	3.56925	2.58015	3.6241	3.08576	4.94298	4.29719	3.3505	4.87823	3.3799	4.05918	3.58256	3.67694	4.20789	4.88655	5.29793	4.57833	1.76553	4.14893	SPATA20	FALSE	0.227987
					1.31034																								CACNA1G	TRUE
3.60999	4.21645		1.09085	3.78031	3.57168	2.29866	1.99277	5.6837	4.63343	6.73308	1.98185	1.23879	5.12805	0.298658	1.15704	5.84875	5.15137	2.38681	1.47508	3.62176	4.25475	2.66448	1.36177	1.62761	1.90304	2.8339	0.545968	4.2502	TNFRSF12A	FALSE	0.57158
					2.14731												1.56071								1.33342				DLX6	TRUE	0.2499
		1.29866		0.111031		2.31325					0		0.298658											0.214125	1.87971	0.432959	1.40054		MAP3K9	TRUE	0.967928
4.79805	4.02148	4.52231	4.82222	4.55213	4.38405	5.32841	4.22651	3.72465	4.08576	3.51854	3.81352	3.50589	5.68257	3.7845	4.0321	3.06867	4.79338	3.77083	4.71094	3.38681	4.37226	4.13258	3.84097	4.71039	4.21023	4.27202	4.8166	4.0072	RALA	TRUE	0.138094
2.7761	1.72247		4.27501	4.36877	1.0072	2.9782	3.78973	0.847997	3.51979		2.16672	2.43829	3.26303			3.18745	3.31179	4.55704	3.96625	3.26003	4.58976	2.03914		5.19574	3.12267	3.43829	1.91073	2.24184	BAIAP2L1	TRUE	0.366768
1.44361	2.96717	1.86394	2.97453	3.0635	3.52732	2.29278	1.5008	2.89724	1.99639	1.40054	1.926	1.02148	2.14405	3.22651	0.748461	1.72247	2.93923	2.12433	3.34767	1.51096	2.99095	2.22033	2.73552	3.33485	2.9241	1.16993	2.70708	2.02148	KDM7A	TRUE	0.338774
3.91169		7.0082		0.201634	1.1177	0.0426443		0.757023	3.54226	4.60763	0.226509		4.16189				1.50589	0.584963	1.56071	6.07125		0.432959	3.30743	1.02148	2.87381	4.18349		1.40599	ETV1	TRUE	0.853673
3.62293	3.21101	3.45022	3.85898	2.45418	3.71589	3.38405	3.8748	2.72028	2.81967	4.26529	4.02591	3.0018	3.11437	3.33342	3.04614		3.02148	3.54226	2.95047	3.08066	2.60407	3.44626	3.26454	2.85997	2.62994	3.0268	3.91456	3.14241	AGK	TRUE	0.141815
3.53481	2.64386	0.669027	2.20477	4.39438	1.23266	1.56071	5.35014	2.35614	3.04089	1.38405	3.07211	0.823749	4.90785	1.28096	0.495695	2.17951	3.33914	0.422233	1.45418	2.14078	3.86691	1.33914	3.1375	4.11103	0.0840643		0.214125	3.22805	ALDH3B1	TRUE	0.635424
	0.0840643		3.39369	3.29278	1.04264	4.98322	1.81967		1.25096		1.87578		1.0635			1.59455		1.72683	3.07382	2.37016	3.61824	0.411426		3.78764		0.344828	2.55827	0.176323	TTC22	FALSE	0.686946
2.16672	3.48156	2.26303	2.20789	1.05658	3	2.52607	1.53605	2.852	2.854	2.98185	2.10769	1.848	2.52105	3.61941	2.50843		2.67129	1.88362	2.26903	0.722466	1.38957	2.48285	2.95047	1.56071	3.34056	2.50335	3.65878	2.92029	PHTF2	TRUE	0.305383
0.238787									0.422233				0.0426443	0.137504	2.32481													0.464668	CCL26	TRUE	1.41772
2.69599	3.02148	2.9241	4.35685	3.9241	3.12928	3.53978	2.89724	3.07553	2.80116	1.20789	2.97269	2.70266	2.20163	2.76553	2.50843	1.40599	2.85798	2.32769	3.90689	2.46205	3.59694	2.95233	3.06005	4.32481	3.71918	1.37295	3.42089	2.73769	FARP2	TRUE	0.265376
	0.659925	3.7126	5.45253	6.43112			0.83996		4.84398		5.30816								5.09128		6.32373	2.22033		4.95					USH1C	TRUE	0.491985
4.39025	4.82528	4.31397	5.80632	5.13134	4.7126	5.36492	5.19613	5.60318	4.51916	4.41278	4.65076	4.2854	4.74846	4.09424	3.60526	4.05137	4.8674	5.14405	5.02813	4.59694	4.83744	4.22342	3.65992	4.45615	3.72247	5.1206	4.8535	4.37086	GGCT	TRUE	0.117645
	2.42492		2.18903	1.1375	1.32193	0.948601	0.400538	1.43296			0.275007		0.485427	2.36177	0.823749			0.831877	1.96717		1.49057	0.863938	1.57531	1.59455	4.52419	0.594549	3.07553	0.722466	DBF4	TRUE	0.691019
1.1177						1.22651		0.0285692	1.26303				0.250962				1.0072						1.66903						TBXA2R	TRUE	0.624879
5.47281	4.92552	4.55397	3.54226	4.92362	3.76235	4.12598	3.33199	4.83643	4.21257	4.65478	4.15704	2.9486	4.07639	3.0268	3.5472	6.93239	3.6311	4.58496	4.38405	4.22728	4.68257	4.30816	3.82579	4.20945	4.96255	5.02857	3.05658	4.55336	IFRD1	TRUE	0.191825
																	4.38336												LGALS14	TRUE
2.0321	2.53107	2.30743	3.76871	3.76765	3.11103	3.26604	2.61353	2.42223	2.16027	4.1375	3.30451	3.32048	2.3978	2.72247	2.09085	2.9222	2.83188	2.20163	3.29278	2.62059	3.48543	2.74201	1.53605	2.38405	4.01346	2.79909	3.05485	2.78031	COX10	TRUE	0.220272
2.09424	1.23266	2.43563	2.42492	1.67807	1.92979	3.19692	2.15704	0.344828	2.02857	2.22033	3.07724	0.799087	0.895303		2.21723	2.98732	1.3505	2.46205	2.44095	2.59932	2.65535	3.49057		2.57773	1.57531	4.05311	0.713696	2.68482	GTF2IRD1	TRUE	0.407739
4.774	4.41143	4.21956	4.0798	4.06695	4.15218	4.30159	4.78816	4.1819	4.44095	4.49825	4.45878	4.01881	4.49761	4.35544	4.86196	3.75489	3.98003	4.53854	4.43095	4.29425	3.97177	4.40327	4.64904	4.23343	5.15097	4.42291	4.63285	4.48414	PAF1	FALSE	0.0689202
4.57107	4.26303	5.47606	4.80478	3.96532	4.65306	4.54288	4.73335	4.33985	4.84097	4.57531	5.21723	4.23496	4.2555	4.58075	4.65535	3.74201	4.15704	4.18031	4.01257	3.17473	4.25172	4.39094	4.38405	4.58015	4.1635	4.99865	4.59096	4.97361	VPS41	FALSE	0.101386
1.42761	0.555816	2.83794	3.92125	3.20477	0.176323		3.26303		2.96532	1.20789	1.0072		3.85997		2.53107		3.31034	1.36737	3.75702	2.36457	2.89142	2.10434		1.26903	2.29866	2.56316	0.0976108	0.0565835	ARHGAP44	TRUE	0.579144
4.70929	3.91839	3.66448	4.57168	3.89627	3.86592	4.4363	4.16511	3.92979	3.75061	4.46989	4.53916	4.54102	3.61117	4.01881	3.57652	3.21101	3.76977	3.8268	4.30743	3.56071	3.64155	4.28096	4.0268	3.43829	4.18428	3.81455	4.73606	3.81352	ELAC2	TRUE	0.100612
0.176323		1.4957	4.90881	4.9905		3.35755	2.12763		2.76129		6.30268		1.74416				4.17393	2.46467	4.3427		5.48896	1.65535		5.09803	2.23573	0.757023	2.12763		SCIN	TRUE	0.566766
2.72901	1.52607	1.67356	4.00988	4.36387	3.67807	2.68032	4.96209	2.67582	3.40054	2.01078	5.39506	5.60822	3.99186	1.67356	3.90304	4.18349	2.87971	4.52669	3.65076	3.97361	3.84699	3.21412	2.64847	4.28021	2.03914	4.14078	1.41143	2.09085	ARSD	TRUE	0.349019
4.55213	2	0.632268	3.32769	4.3147	3.62761	3.69711	4.70321	2.68706	2.70708	5.33914	4.89482	4.96947	3.56071	2.63227	3.94767	4.25852	2.46467	4	3.10434	4.27501	2.88557	3.39094	3.03738	3.38957	3.30012	4.58135	3.05832	2.88362	PNPLA4	TRUE	0.286455
5.80168	4.04089	5.90063	5.09972	4.99322	4.12846	5.12846	3.74739	5.46172	3.94111	3.79909	4.63517	6.12495	4.22419	3.76235	4.12019	5.34376	4.12516	4.21335	4.89918	3.7126	4.89772	4.07724	3.51854	5.29278	5.12102	4.52607	4.38267	3.64847	ADIPOR2	TRUE	0.161726
1.33914		1.82375			0.731183	0.505891	1.27501		0.650765	2.0036	0.0565835		0.505891					0.124328							3.07553	0.344828		0.695994	CDKL3	TRUE	0.859378
											5.0781	6.27146																	UPP2	TRUE	0.148699
							1.96717		1.37295									2.35614	0.400538				1.12433		4.76182				PRSS21	TRUE	0.7585
3.17951	1.8953	2.8953	0.739848	1.76977	3.41007	2.94298	2.24793	2.23573	3.28392	2.56316	2.16027	1.89142	2.15056	2.03562	3.40327	2.94298	2.42492	2.84599	1.85997	2.50843	2.09761	3.07382	3.16672	2.23573	4.7021	2.49313	2.34199	3.37434	MARK4	TRUE	0.285493
	0.739848		5.17552	3.07895	1.85997	2.08406	2.12433		4.87332	2.63459	4.52544					3.13586	4.41143		4.80374	5.6659	3.65306	2.28983		4.92267	1.52607	0.992768		1.63691	PROM1	TRUE	0.489843
4.14078	4.47444	4.19613	1.74416	4.18824	3.96532	3.40735	3.72247	3.26754	3.76871	4.83289	0.757023	2.80116	4.44493	3.17632	4.10601	4.54782	4.10852	4.79546	1.90689	5.1206	4.17153	3.04439	4.01167	4.30889	3.9644	1.46989	2.40871	3.75061	CCDC124	FALSE	0.296845
	1.14405				2.80323								2.31615	2.49313									2.26303				2.32193		CEACAM21	TRUE	0.253912
5.0505	4.83693	6.09043	5.10014	4.82934	5.08108	5.21801	4.73715	4.80116	4.61824	5.01167	5.42895	4.09677	5.01033	4.78869	4.87135	4.01167	4.71809	4.45418	5.20633	4.5292	4.87823	5.24451	4.79129	4.97728	5.43929	5.3107	5.15583	4.80271	PAFAH1B1	TRUE	0.0820669
	3.89045		1.21412	3.29719									0.773996						1.926		1.52105								NOS2	TRUE	0.583995
					0.632268		5.51191																						DNAH9	TRUE	1.12315
4.60051	4.52042	4.38681	5.1127	4.02945	4.27277	4.81198	4.87381	4.54411	3.74631	3.57531	5.45713	1.73118	4.69042	4.58195	4.21568	3.54473	4.56255	3.81967	4.69098	4.37434	4.29425	4.81865	4.50843	4.63459	4.42021	5.05094	4.74631	4.34554	KIAA0100	FALSE	0.153204
			1.22651	6.65363					2.51602		4.61294								1.31615	4.86344	6.53683								SLC13A2	TRUE	0.580192
2.92029	4.42156	5.40361	3.66221	1.81558	3.42626	4.7252	4.35332	5.4822	3.91648	3.0268			3.35473	2.92029	2.82171		3.98277	1.23879	3.17792	0.895303	1.74416	3.5472	3.59813	1.91839	4.45878		2.63459	4.53232	GAS7	TRUE	0.360115
3.61589	3.20006	2.35332	2.83188	4.05311	3.97728	3.13586	4.62702	3.16832	4.67469	3.83794	2.42761	4.41481	3.70819	4.00809	3.68706	3.70044	3.74631	4.81916	2.22033	4.24413	3.78241	2.37573	4.34341	3.95513	3.04789	3.24945	2.52857	3.63343	TRAPPC6A	TRUE	0.206242
	1.37851	0.815575		1.54102			0.443607		1.76129				1.41143	2.19535				0.356144			1.5656		3.10936						MATK	TRUE	0.562208
	5.15987		9.87764			6.30743			6.64703										9.30677			4.25927		0.941106			3.19849	5.52826	CEACAM7	TRUE	0.493146
0.163499	6.17173		2.46205	1.96347				0.298658	2.88362	2.64155	1.63691	0.799087	2.19219	7.5585			1.59932		2.58015		1.31034		6.75716	1.3505			7.13278	3.94298	CD79B	TRUE	0.79544
								2.63459																					SCN4A	TRUE
1.14405	0.0565835		0.189034	0.31034	1.74416		0.910733	0.443607	1.04963	0.9855	1.09761	1.02148		1.0072	1.41684		0.464668	2.21723	1.39506			1.83996	1.13093	0.713696	4.49057	2.74416		0.189034	ST7L	TRUE	0.823673
																									7.33414				TKTL1	TRUE
		3.88069														2.64616								5.05702					PAX6	TRUE	0.312213
1.42223	2.09085	1.66903		2.61589	1.48543	0.790772	0.594549	0.298658	2.21412	1.39506			2.17632	2.47768	1.65535	2.07039	1.774	2.62059		2.84398	2.18269	0.0976108	2.43829	2.31034	0.400538	0.0703893		2.01792	RPUSD1	TRUE	0.515462
2.14731	2.43296	0.545968	2.60644	1.7137	3.3147	3.67243	2.68706	3.01078	4.49697	4.30524	0.62293		3.48156	1.64155	4.0018	2.96162	4.90833	4.47638	2.86592	4.17552	0.970854	3.30305	2.79909	2.82375	1.83996	3.67807	1.20789	4.14812	RHBDF1	TRUE	0.419931
3.79494	4.09677	4.84097	3.48543	4.12267	4.16912	3.65421	4.07125	3.90593	5.03606	3.8166	3.70819	0.687061	4.15462	5.03122	4.50398	2.88947	4.28614	5.01123	4.71039	4.31542	4.72738	5.09887	4.68089	4.23802	4.848	4.12928	4.14975	4.37365	LUC7L	TRUE	0.203824
		0.903038			0.137504								5.48253					0.948601				0.0285692		2.64847	2.58736				CACNA2D2	TRUE	1.06029
3.80219		3.25852		1.50589			4.98322							0.238787		1.89142	0.790772	2.09424		1.61353	1.79909		0.895303	3.41954	2.33628				BAIAP3	TRUE	0.608758
4.16832	4.17153	4.23649	2.68032	4.40122	3.81044	3.7761	3.49697	3.33914	4.51349	5.13627	1.85997	2.75489	4.39163	3.73444	4.23802	4.64443	4.1127	4.50398	2.65076	5.15381	4.1811	2.81558	3.94298	4.18982	3.80529	2.81147	2.55582	3.96532	TSR3	FALSE	0.213514
3.45812	2.21412	2.852	1.79077	1.88753	2.40599	0.773996	3.37712	1.52105	2.99458	1.51602	2.71809	2.01792	3.08066	1.48027	2.488	2.80116	2.01078	3.7126	1.4957	2.79701	1.774	2.60644	1.99639	3.20477	2.57531	3.33914	0.713696	2.0635	PIGQ	FALSE	0.334519
1.72683	1.9222	2.68032	1.70929	2.24793	1.95977	1.87184	1.73118	2.57773	1.72247	1.43829	1.38405		2.29866	2.62994	2.68706	1.76977	2.34483	2.41684	2.14078	2.0321	2.10769	2.75061	2.66903	2.63227	4.09677	2.06695	1.80323	1.83592	CRAMP1	TRUE	0.250571
1.51096	2.98914		3.61117	3.76022	4.87971	4.66391	3.72465	3.54967	4.31397	4.41143	2.74416	1.15704	3.2555	0.263034	3.49442	2.51602	4.49442	4.35403	4.82426	2.86987	3.58135	5.36702	2.5435	2.98914	2.82985	2.04614	2.17951	4.72247	TEAD3	TRUE	0.365424
2.81558	3.3147					0.176323		4.10434	3.91934				0.641546	1.4489			0.15056	2.62293	3.13586								1.15704	5.1534	SELE	TRUE	0.691233
4.13832	3.70708	3.29425	4.63923	4.24108	3.64616	3.58976	3.60644	3.0054	3.30743	4.21101	4.92932	3.92695	3.26604	3.28392	3.59096	3.36597	3.51979	3.34625	4.25475	3.35473	4.04439	3.7939	3.73444	3.57531	3.77821	3.33771	3.5435	3.5435	DNAJC11	TRUE	0.118532
2.74631			0	0.903038		1.70044	2.58496	1.97453	0.641546	1.1375	3.27798	9.01987	2.41143	0.378512		1.43296				1.83996	0.176323	0.214125		2.18587			2.46989	0.505891	FMO3	TRUE	1.06396
3.89724	3.84197	3.34199	3.88166	4.01614	5.26754	3.94673	5.13463	4.36807	4.79338	3.16832	4.75542	1.45943	4.86394	4.85997	4.8334	3.44493	5.83946	4.13258	4.22419	5.04658	3.7761	6.02326	4.18903	3.34767	3.97911	5.16551	3.78764	4.58195	MYLIP	TRUE	0.212273
			5.374																5.49474			1.58015							NOX1	TRUE	0.536447
	1.02857		2.86394	1.4957		0.790772								1.02857			0.201634		1.83996		1.38957				0.83996		2.4489		E2F2	TRUE	0.578496
6.69725	6.79831	6.09529	7.29829	6.81724	6.93499	6.72751	7.07328	6.51869	6.69502	7.53201	6.78398	7.57425	6.86641	6.38232	6.25701	5.97292	7.0036	6.54288	6.96428	6.31325	6.69572	6.98925	6.35315	6.38422	6.25134	6.58706	7.40361	6.7137	PSMB1	TRUE	0.0602873
2.48027	0.422233	5.21218								1.91073																			SYN1	TRUE	0.798654
1.29278	2.80941	2.83188	1.9855	2.18269	2.45681	2.78031	1.08406	3.47638	1.81147	1.33342	1.01436		1.87578	3.23113	2.12763		2.49313	1.93357	1.96347	1.926	2.47508	1.88753	3.12267	2.75702	4.39506	1.12433	2.96532	1.87184	JARID2	TRUE	0.352136
0.526069		2.80116			2.488	2.16027	1.45418	1.43296	1.26903	0.565597	3.24336		1.93357		2.42223		1.51096	2.25399	0.400538			0.526069		2.61117	3.16993	1.87184		0.226509	CDKL5	TRUE	0.554642
1.0635		2.9855									2.63227				4.85			2.04264				0.0426443	2.12102						CAMK1G	TRUE	0.674245
2.84197	3.89433	1.94111	3.30743	3.49442	3.2555	2.48027	1.64616	2.09761	2.30743		1.85997	1.35614	2.18903	3.58256	2.43296	1.50589	2.45943	3.05137	3.44626	1.87578	4.36107	3.46205	3.70377	3.06867	3.67469	2.67582	2.88362	2.67807	CDK11A	TRUE	0.284935
5.22033	4.79909	2.57531	4.23573	4.66903	4.13258	3.60644	3.5741	5.33771	4.28244	3.7301	2.45418	4.29939	4.35896	4.98413	3.84699	3.61471	4.35896	4.35332	3.74308	4.74578	4.46074	3.62994	5.21917	5.13011	4.37226	3.47897	3.68594	4.52732	NADK	FALSE	0.171657
1.74846											1.85997									1.30451									TFAP2B	TRUE	0.17943
							4.68145																		2.65992				DLEC1	TRUE	0.389419
3.14405	2.19535	3.17951	2.28688	3.69377	3.50335	3.8268	2.72247	4.01881	3.62176	3.56925	2.68706		3.73769	2.38957	3.35755	1.98185	4.87578	2.52857	2.82171	2.54844	3.83086	3.58496	3.02326	2.99458	3.98003	2.96347	1.24489	3.22033	CYTH3	TRUE	0.240693
2.43829		4.21801			2.05658						2.38957			0.910733	1.09761			2.43829	0.863938			1.97085	0.238787		0.454176				ADAM22	TRUE	0.669114
5.74739	5.48027	5.25248	6.14466	5.61589	6.66619	6.62688	6.65835	5.39712	5.8505	5.36177	6.98573	5.37608	5.89409	5.79416	5.71644	4.8495	5.98596	6.20594	6.18388	6.4801	5.39609	6.60452	5.56285	6.18804	6.23458	6.48043	6.69961	6.16229	SYPL1	TRUE	0.0893072
6.77321	2.84197	2.28392	4.23955	4.34056	3.9855	4.23802	5.8009	2.52607	4.05745	1.81558	3.74953	1.82375	4.78921	2.18903	3.34625	5.32733	3.44095	6.29921	3.63459	5.44626	4.49697	2.86196	2.42492	5.68313	1.9486	4.72465	3.0018	3.51223	CYB561	TRUE	0.35841
4.18428	3.83592	6.14466	4.25776	4.07039	4.48607	4.87676	3.64155	5.1631	4.28244	3.53481	5.01167	4.32265	4.48929	3.6565	4.59694	3.86592	4.41075	3.54597	3.96347	2.65076	4.04177	4.53667	3.7845	3.50716	5.13545	5.29425	3.62176	4.17473	SPAG9	TRUE	0.163927
0.163499		1.93357																											CELSR3	TRUE	1.19369
2.41684	1.29866	3.42761	0.782409		2.83996	2.18269	1.95233	3.81967	2.15056	2.68257	3.50208	4.23879	1.73552	1.79077	3.64501	3.27947	1.78241	3.31325	1.70044	1.94486	1.60881	3.72792	2.12433	1.89142	1.87184	3.04264	0.704872	2.40599	AASS	FALSE	0.384119
			3.97269	4.39712		3.09592		1.51096	1.69599			2.02148					3.22033		2.6017	2.01436	5.12516	0.565597		2.57531				0.713696	PLEKHG6	TRUE	0.531127
3.45681	4.59395	3.61824	4.19061	4.1152	3.65076	3.36317	3.3147	3.53481	3.69822	3.72137	3.56925	4.40395	3.80219	4.8535	3.61824	3.0268	3.42223	4.48027	4.07724	3.64616	4.5008	2.97453	4.09001	3.88264	3.07382	3.75382	5.15543	3.67694	SS18L2	TRUE	0.139659
3.04614	2.49057	2.45154	3.1811	4.59515	2.85798	2.71589	2.95791	1.95233	3.80941	3.02326	1.76129	4.19535	3.25852	2.65535	2.45154	3.56803	2.17632	3.82985	3.15866	3.43296	4.0798	1.92979	2.48027	3.43563	2.76977	2.44626	1.8679	2.93357	MPND	TRUE	0.245628
9.45453	6.0045	5.61853	8.75415	6.87443	5.74578	4.86245	5.57652	9.48746	7.07671	1	7.93923	10.6685	7.03892	0.669027	1.47508	5.58346	5.15785	7.02768	7.39086	5.98596	6.45894	5.40224	0.495695	5.81044	3.91839	7.23467	2.60881	6.85237	MGST1	TRUE	0.446242
3.20163	2.60644	2.97085	2.28688	3.0018	3.63923	2.86592	4.25475	4.14241	2.62059	2.37295	2.98185	1.61824	3.69711	2.59455	2.33342	3.3147	3.29131	3.56071	2.95977	2.93734	3.76871	3.38267	2.67356	3.06523	4.52356	4.06867	1.89142	3.06695	CRY1	TRUE	0.223263
	0.641546							1.7137									0.713696						1.21412						PGLYRP1	TRUE	0.465596
3.69488	3.64847	6.91097	3.52607	4.15866	5.80839	5.70708	5.42593	4.93026	5.74766	4.3978	2.62293	3.66107	5.67751	2.62994	6.24774	3.34056	3.12433	6.44758	4.11686	6.73971	3.62877	6.03958	3.6311	5.30342	4.1235	4.0993	1.67807	5.62819	NFIX	TRUE	0.298654
4.16832	4.25248	1.15056	1.9782	1.48543	2.62994	3.17951	2.40054	5.42021	3.74739	4.84398	5.58826	5.50684	3.86493	4.60822	3.27202	3.38128	3.43962	1.60407	2.14731	3.75596	1.89142	3.26903	3.78869	2.10434	2.18587	6.48639	4.07125	3.89142	ST3GAL1	TRUE	0.393121
	4.16108							3.80323					0.704872	0.9855			0.0565835				0.495695		2.77189				0.111031	0.321928	MMP25	TRUE	1.0952
4.19928	7.20144	3.35473	6.01725	7.54581	3.98185	3.78346	2.53107	4.52732	5.67016	5.90833	4.61235	4.80684	7.85119	7.12629	4.27947	6.94825	5.74631	4.17552	5.4957	3.84599	7.79403	3.79597	8.1636	4.91025	3.68594	0.124328	6.75649	5.12805	IL32	FALSE	0.352062
3.0635	1.54597	3.13093		1.70487	2.47768	2.21723	0.464668	0.613532	2.21101	2.96347			2.28096	1.0072	3.75916	1.44361	1.98185	3.3799	0.411426	2.80116	1.65535	1.53605	2.09085	1.8953	2.91073			2.50335	PKD1	TRUE	0.436186
2.91073		3.94673													1.68706			0.0285692		0.604071				1.25701	1.73118				MAPK8IP2	TRUE	0.76825
3.73985	4.14812	4.74524	4.40939	4.34625	5.29609	3.57046	4.78607	2.86394	3.85898	3.89433	3.81044	2.90881	4.0268	4.13011	3.9486	2.98732	4.13914	4.00809	4.0635	3.99186	4.55949	4.43162	4.13258	4.393	4.78816	3.53481	4.33842	3.94392	MED24	FALSE	0.136025
2.07724	2.55336	3.97728	0.887525	2.99458	2.13422	1.10434	1.87578	0.485427	2.33628	3.77716	1.40054		5.00854	3.4957	3.20633		3.10434	1.83592	1.03562	1.43296	3.0321	2.03914	3.66448	2.50843	3.31179	4.05745	3.53107	3.01436	RHOBTB2	TRUE	0.432178
2.8953	2.9542	3.0268	2.95047	2.94486	2.70044	2.53854	2.82375	2.68482	2.72465	2.38128	3	2.23266	2.59455	3.60407	2.65764	3.0054	2.53356	3.25399	3.18745	3.06695	2.96901	2.99277	3.21878	3.34341	3.01436	2.93923	3.30451	2.45418	HEATR5B	TRUE	0.107577
6.20379	5.67892	6.48848	5.31288	5.38336	5.77373	5.58796	5.70349	5.64933	5.59066	4.93546	6.69572	6.81173	5.8475	5.34376	5.78895	5.95907	5.86196	6.08066	5.89554	6.36527	5.61412	6.05463	6.0468	6.35702	5.57954	6.62965	6.00383	5.63894	SEC62	FALSE	0.0747434
9.47729	9.80975	8.65206	9.68708	9.55457	10.1405	10.0599	9.83161	9.23692	9.9854	10.0886	8.50799	9.40769	9.62925	11.0651	11.2507	9.84798	9.47005	9.70454	9.34636	10.2053	9.53465	9.44437	10.1225	9.52703	8.62604	10.1853	10.6954	10.319	RPS20	FALSE	0.0644659
7.15178	7.11551	6.29572	7.30834	7.31098	7.39446	7.89664	7.06318	7.29646	7.13822	8.25701	7.63786	7.29701	7.2724	6.96728	7.62527	6.76195	7.05159	7.22448	7.62483	7.26613	7.43246	7.74658	6.92446	7.01569	7.79701	7.94386	7.28725	7.56331	CSDE1	FALSE	0.0538123
3.95606	4.18428	3.53232	4.34127	4.02148	4.40531	4.72955	3.96532	3.99095	3.79597	4.15462	4.16912	3.96717	4.08661	3.97085	3.93829	3.62527	3.89821	3.87283	4.24489	3.73985	3.91361	4.19849	3.85798	4.09339	4.65764	4.0268	4.16108	4.33842	UBE3C	TRUE	0.0658445
1.75275	2.39506	2.66448	1.83996	0.411426	4.46271	2.40054	3.38128	3	2.40871	1.33342	1.84398	0.62293	2.42492	2.21723	2.15381		2.81147	2.29278	2.42223	0.575312	1.04264	4.1127	1.28096	2.55582	3.22651	2.23266	1.54102	2.28392	REV3L	TRUE	0.436528
0.321928												1.18269						1.62761								2.35896			TENM1	TRUE	0.620659
	0.15056	0.748461	0.545968				0.238787	0.263034				6.96012		1.07039	0.454176				0.464668		0.575312	1.38405	1.35614	1.09761	0.411426				MASP2	TRUE	1.53901
			2.5008	3.81147					2.32193		4.6011	4.07895							1.67807		4.37434			0.163499		8.30314			IYD	FALSE	0.650146
1.32193	2.66221	1.65992	2.22342	2.40327	2.66448	2.80529	2.50843	3.51602	2.14078	2.05311	2.15704	1.23266	1.83188	1.91456	1.7866		2.18903	1.96717	2.52857	1.29866	1.47508	2.74201	2.34483	2.71589	3.38957	3.0993	2.29866	2.09761	FAM76A	TRUE	0.261149
2.46205	5.28947		2.63459	2.30451			0.0285692	1.31034	2.95606			2.65535	2.65992	6.55075	0.226509		0.298658	0.163499	2.87774		3.36036	1.16993	5.70708	2.49313			6.03474	3.27202	TRAF3IP3	TRUE	0.717621
2.0635	1.48027	2.49057	1.4957	1.61824	1.33914	1.7137	2.40871	1.22033	2.40327	1.28688	1.32769	0.536053	2.25701		1.87578	1.64155	2.72247	0.847997	1.67807	2.10098	0.263034	1.93734	0.823749	2.09424	3.7866	2.29866		1.33342	POMT2	TRUE	0.421066
4.30524	4.45022	4.86443	5.10685	5.08831	4.65421	4.97177	5.04658	4.10601	4.12681	4.53978	4.73769	4.84449	4.34979	4.3978	3.99458	3.34056	4.59455	4.0009	4.87381	3.68818	4.9486	4.41684	3.94392	4.38681	4.2891	4.39917	4.9782	4.52669	VTA1	FALSE	0.0979696
5.41109				5.0009			1.69153	3.87676	2.79909		1.46467	5.4489				2.24489			0.137504		5.24603			3.92125	3.44493	0.111031			MLXIPL	TRUE	0.607681
4.18982	4.24489	4.28614	3.97728	3.75702	4.52105	4.0321	3.99548	3.8125	3.75382	3.52231	4.21023	3.72683	3.97453	4.33342	4.69042	3.67582	4.02326	4.01346	4.31687	3.52482	3.80012	4.54102	4.2502	3.94486	4.40395	4.72955	4.45088	4.0505	BAZ1B	TRUE	0.080087
4.18349	4.06609	4.13504	3.9364	3.56316	4.09761	6.03342	3.69599	4.21257	4.33342	3.88362	4.27202	3.92125	3.79494	3.82069	3.88264	3.32912	3.82273	3.97911	4.30743	3.08406	3.24489	4.69933	3.62761	4.00899	6.2937	4.24869	4.6893	4.37016	RANBP9	TRUE	0.164942
	3.24945		0.632268	3.3978					0.9855				1.37295	1.14405			0.970854			3.28244	3.23266		0.15056	2.01436			0.189034		ETV7	TRUE	0.734242
1.28688	1.74846	2.25399	1.35614	1.18903	2.20163	2.19849	1.48027	1.49057	1.32193	1.29278	1.45943	1.22651	1.38405	1.78241	1.19535		2.41414	1.43829	1.26903	0.757023	1	1.7137	1.66448	1.68706	3.17153	1.99277	2.02857	1.7137	SPRTN	FALSE	0.306936
3.23573	3.24031	3.26003	3.43162	3.16672	3.24031	2.5435	3.39643	2.53605	2.8953	2.03914	3.09424	2.69377	3.37295	3.09592	2.9855	2.29278	2.54844	3.22651	3	2.88947	2.96717	3.33056	3.02326	3.16993	3.95699	2.55582	3.54226	2.69599	METTL13	FALSE	0.134734
0.124328			1.14405	1.17632	1.50589	0.594549	0.432959	0.111031	1.34483	0.948601			0.0565835	1.45418	0.0976108		1.0072		1.22033		0.333424	0.650765	0.367371	0.176323	4.28392	2.28096	1.49057	0.847997	DYRK4	TRUE	0.960444
5.34767	6.0813	5.53854	6.29205	5.56133	5.96093	6.19692	5.90256	5.74255	5.34554	5.10056	5.57592	4.97774	5.48446	6.26078	5.43396	4.67525	5.8382	5.66078	6.10748	5.21451	5.56407	6.01703	5.72574	5.71177	5.84323	5.67948	6.86666	5.89458	ZNF207	FALSE	0.0775142
6.17133	5.21257	5.90689	7.62022	7.33566	5.92172	6.39008	6.30323	5.31542	5.68594	8.81785	6.83983	7.09803	5.76022	5.29499	5.1918	6.03914	5.80142	5.7952	7.06738	6.03408	7.01235	6.06264	5.51475	6.00854	5.92077	6.23974	5.88777	6.19377	UQCRC1	TRUE	0.129265
4.15462	4.29057	4.87725	4.17712	3.65306	5.09339	3.53107	4.53045	4.33271	3.95699	4.10601	4.53045	2.88947	4.76022	3.81865	4.08236	2.81352	5.18626	5.36352	4.35755	3.19535	3.8748	4.10936	4.16672	3.78764	5.05745	4.42358	3.63227	4.56438	STARD3NL	TRUE	0.151919
7.53442	5.72547	7.20643	8.7657	6.76779	7.54659	9.11606	7.96936	5.63052	6.58241	6.40548	7.52325	4.26153	8.65746	4.55766	5.39712	5.56651	6.31976	9.23321	8.43555	8.50355	6.63952	7.43221	5.96878	6.27072	4.75702	7.3746	7.81941	7.70217	CD9	TRUE	0.196551
		3.77926					0.344828			8.37243										3.38543						4.16189			HHATL	TRUE	0.715747
2.61353	4.21568	2.80323	4.41886	3.78869	3.60526	3.48027	3.29131	2.37573	2.97636	2.05311	2.82579	0.895303	3.13258	4.30305	2.61117	1.91456	3.6792	2.62994	3.75702	2.90111	3.70819	3.56803	3.53481	3.58616	3.69711	2.88753	5.05875	3.19377	NCAPD2	TRUE	0.260306
0.15056	1	0.815575			0.757023	0.422233			1.22651	0.695994			1.774	1.08406	1.13093		1.14405	0.687061	0.422233		0.516015	1.78241	2.1635		1.64616			0.454176	IFFO1	TRUE	0.561419
			1.12433				3.03738	0.356144						0.275007					0.941106		1.67356		1.14405	4.37156			0.400538		GIPR	TRUE	0.932142
			1.9222	1.10434					0.214125			0.85599	0.389567				0.275007	0.0703893	2.01436			0.0703893		0.137504	9.19044				PHF7	TRUE	1.79776
0.918386	1.26303	1.38405	1.7866	0.918386	2.31904	1.53107		5.27836	2.9279	2.21723	2.78241		2.96901	0.526069	0.124328		4.21723	1.32769	2.06695	3.17632	1.34483	2.16993	2.93357	1.72683				2.43563	SEMA3G	TRUE	0.561435
5.16189	4.44029	4.88166	3.85898	4.25927	4.56255	4.20789	4.31759	4.22728	4.91456	3.95513	3.78869	3.16832	4.44493	4.95652	5.32553	4.7845	4.90207	5.94322	4.20085	5.01525	4.36457	5.09508	4.92267	4.70874	5.55428	4.0054	3.76129	4.68089	NISCH	TRUE	0.130744
5.22651	5.37955	1.33342	3.6311	3.94017	2.47249	3.31034	1.07724	5.95722	4.6153	3.24793	0.0840643	4.06609	3.76765	3.24945	2.17951	1.73985	5.13299	3.21412	4.35544	0.687061	3.87774	2.7866	5.90857	3.80941	2.64386	1.40599	1.93357	4.79701	STAB1	TRUE	0.474285
2.7137	0.555816	1.852		0.536053	1.83996	0.31034	4.56925	1.79494	2.89336	1.73552	1.10434		2.7137	0.555816	2.93168	2.29866	1.68257	2.19849	0.226509	0.963474	0.871844	2.26003	1.42761	2.0635	4.08831	0.678072	0.137504	2.17313	FUZ	FALSE	0.648878
							3.22959				6.74174	3.25399														0.0285692			SLC6A13	TRUE	0.827503
5.60822	5.08916	6.85237	4.75275	4.13668	4.65478	4.93452	5.26003	5.25814	5.04396	5.00944	4.93499	3.57531	5.32948	5.35191	5.79286	3.52105	4.3505	4.67807	5.0635	4.30378	5.1469	5.74443	5.41007	5.1035	3.57773	4.8748	5.23496	4.94017	IDS	TRUE	0.141583
1.51096	1.04963	1.848	6.24432	6.33967		5.6761			4.12846		0.475085				4.97636	14.5198	1.93734		6.04549		6.57168	2.854		3.02857			3.86691	0.298658	PRSS3	TRUE	0.814895
0.400538	2.52105	1.80323	1.28096	0.31034	1.33342	0.163499	1.91073	1.42223	0.632268		1.41143	0.443607	1.20163	2.10769	0.0426443		1.79077	1.05658				1.20789	1.93734		3.83996	1.11103	2.0036	1.15704	ZNF200	TRUE	0.636874
4.26604	5.91862	2.79077	4.5435	3.88753	3.01078	3.74201	3.89142	6.43263	4.90014	1.926	2.84398	6.63865	5.42626	6.63125	2.94298	1.70044	4.90641	2.25096	3.59216	1.774	3.99458	3.3147	7.01458	3.51223	3.53854	2.21723	5.5598	5.22882	CD4	FALSE	0.379468
1	1.23879	3.18587			2.45943	0.238787	7.66057	1.20789	1.23879	2.21101	2.73335		2.71149	0.454176	2.56071		0.163499	1.59455	1.18269			2.56316		1.91073	4.39369	2.68032	0.879706	0.910733	LRRC23	TRUE	0.798299
1.70487	4.80735	0.400538	2.87381	1.65992	1.02148	1.73118	0.378512	3.04089	2.46467			2.06005	3.62761	5.47638			1.94486	0.356144	2.26903		1.88753	2.18587	4.90063	2.0036			6.0054	3.28983	BTK	TRUE	0.625476
2.79494	0.970854		1.58496	2.03562	0.731183	0.731183		3.87578	2.61353		2.49057	3.83592	1.63691	0	2.09761		1.0072	2.10434	1.57046	0.863938	1.5656	2.09424	1.60407	2.78031		0.389567		2.848	HFE	TRUE	0.555228
3.16027	3.05137	0.333424	3.88069	3.2555	3.89045	3.68818	3.66221	3.21101	3.9644	4.70155	4.07039	0.910733	3.65191	2.79909	4.61353	3.0054	2.90881	4.47962	4.12598	4.19219	3.56682	4.56803	3.23266	3.6017	4.13832	4.10601	2.79909	4.00809	SCMH1	TRUE	0.277562
3.21568	5.42861	6.88435	3.90304	3.34056	4.59753	3.8268	5.29609	5.48478	4.98322	4.69766	3.5509	3.19535	4.98094	6.23592	4.67582	1.89142	4.48671	2.45943	3.68145	1.01436	4.42291	5.29609	5.93946	4.24108	4.4489	5.64587	5.62234	5.17233	FYN	TRUE	0.29394
2.16993	3.12928	2.9542	1.76553	1.20789	2.45154	2.64386	3.36737	3.48156	2.01436	1.75275	2.77189	0.678072	2.23573	3.5373	3.5509	2.73769	2.43029	1.91839	1.94111	2.90689	1.41684	2.27202	2.94673	1.75702		2.5509	3.08746	1.81967	HIVEP2	TRUE	0.304399
2.12433					2.73335	1.42761		2.49057	2.90881		7.53177	1.93357			2.16993		0.0565835			0.641546		0.0840643			0.925999		2.87578	2.1177	FMO1	TRUE	0.8532
3.24489	3.8953	3.1127	3.73118	3.19219	3.65306	4.2854	3.51096	4.47508	3.62176	2.85798	3.82782	4.14486	4.39369	3.73985	3.63459	4.38681	3.73877	3.28392	3.62994	3.69599	3.06523	3.57773	3.40327	4.18824	3.88753	4.65764	4.30012	3.72574	TCEB3	FALSE	0.121986
3.41143	3.67469	2.43296	3.56316	4.60288	3.44095	3.96162	4.61883	3.05485	4.44029	3.64962	2.47768	3.52231	3.851	4.14078	3.17792	3.0635	4.20085	4.18903	2.4957	3.84699	4.17632	2.50843	4.24717	4.35191	3.10936	2.59694	2.72683	3.73118	LYPLA2	TRUE	0.192642
3.04089	2.8679	3.83895	1.94486	2.20163	2.44095	1.63691	1.79909	2.32193	2.29278	2.71149	2.46989	1.1635	2.37016	2.77821	3.46336	1.48543	2.34767	2.73985	2.23879	1.43296	2.25701	3.02857	2.62761	2.37573	3.24641	2.23879	2.18903	2.22651	CLCN6	TRUE	0.248557
2.35332	3.0036	1.18269	0.871844	1.91839	4.28614	2.86394	1.1635	4.53294	5.01212	2.69377	0.584963		3.9364	0.887525	5.22689	1.94486	2.31904	3.94205		1.91839	2.22651	2.84197	3.46467	2.18903	3.39232	2.69377		3.95884	MRC2	TRUE	0.470326
4.36387	4.88313	4.65878	1.31615	3.2032	2.89724	3.00899	2.45943	2.06695	1.62761	2.1635	0.275007	1.33914	4.24641	1.73552	1.59455	3.04789	3.0054	3.68032	1.07039	3.7137	2.91456	1.99639	2.10434	2.20789	0.650765	1.77821	1.36177	3.06523	NME1.NME2	FALSE	0.476299
		1.81558	0.516015																1.90689		0.650765								SLC6A7	TRUE	0.606024
2.95233	2.04264	1.51096	2.1177	2.33628	4.08321	3.3505	2.22342	3.60881	5.10643	6.21529	4.11603	4.32048	4.19219	2.63923	4.49442	2.43029	5.07724	4.48414	2.13093	3.5435	2.28688	4.61706	3.7666	2.10098	2.64155	2.53356	1.88362	3.77505	TSPAN9	TRUE	0.357148
2.40054	2.76765	2.20789	3.09592	2.60881	3.42895	3.75489	3.25399	2.88166	2.52857	1.21412	3.59335	1.25096	2.68482	2.68032	3.04789	1.36737	3.03914	2.70708	3.40871	1.81967	2.75702	3.16993	2.69822	3.23573	3.36177	3.98732	2.43296	2.35332	BTBD7	FALSE	0.253809
0.214125	1.72683	0.0426443		0.970854	0.475085		0.189034		0.807355	0.505891			0.356144	1.21412	1.07724		0.85599	1.09085		2.22342	1.65992		1.38405	0.464668				0.238787	APBA3	TRUE	0.711045
1.92979	1.25701	2.98732	2.58736	1.61824	2.89724	2.16027	4.11437	0.443607	2.71589	1.72683	2.07382	1.02857	2.18587	2.38128	3.13422	1.5509	1.36177	2.75489	2.26604	2.64386	2.09085	2.88362	2.58496	2.74201	3.08066	2.0036	2.29572	1.95233	MKS1	TRUE	0.328981
3.1177	3.62527	3.43829	3.7866	3.62527	3.06178	4.50271	2.80323	5.50684	3.17632	3.42089	3.70155	4.10014	3.63227	2.02503	1.59932	2.97453	3.44626	2.39506	3.24031	3.89142	3.8953	2.5509	1.80323	3.04089	3.58616	4.85947	3.06523	3.59932	ABHD5	TRUE	0.249266
2.0321		4.85798				0.250962		1.774		1.43296			5.8999	0.422233				1.54102							2.19849	2.69153		0.0426443	ANOS1	FALSE	0.873032
4.40122	3.74093	4.22033	3.54226	3.6427	3.69711	3.81352	4.19928	3.85798	4.38405	3.75275	3.84398	3.08066	3.81455	4.40871	4.09339	3.45681	3.76871	4.0063	4.14893	3.27053	3.83188	4.54288	4.10852	3.66562	4.85449	3.87283	3.96993	4.78241	AKAP8L	TRUE	0.104021
1.60407	2.40054	2.9241	2.5435	2.67582	2.36177	1.59455	2.26303	1.32769	1.79494	1.44361	2.28688	2.44095	2.22342	2.72901	2.86394		2.6017	2.30743	2.64616	1.58496	2.64616	2.60881	2.74846	3.09592	4.2765	2.54844	2.54844	1.98185	MBTD1	TRUE	0.250181
3.80632	4.22651	3.82069	3.84398	3.82883	3.5435	3.7866	4.22574	3.74953	3.02148	2.89724	4.0798	3.44493	4.04876	4.19456	3.89627	3.24336	4.02503	3.74739	3.47897	3.03914	3.4019	3.16027	3.85499	3.62877	5.50176	4.60288	4.8166	3.64501	UTP18	FALSE	0.144741
3.03034	3.94767	3.78241	2.90881	2.99458	3.84699	3.73227	3.08066	3.28096	3.40054	3.27352	3.33199	2.27798	3.22651	4.65764	3.98823	3.4019	3.41549	3.02148	3.06005	3.30451	3.28244	3.98094	4.20242	3.33771	4.75328	3.59694	3.89045	3.89627	RNF216	TRUE	0.151158
4.52419	3.19377	4.54473	5.10476	4.56438	4.06695	3.46074	3.94579	3.06523	3.68257	4.05311	4.72792	4.0635	4.25399	3.09592	3.49442	3.8885	3.82477	4.29646	3.85699	3.96625	4.48671	4.02148	2.98914	3.75702	3.24793	5.02459	3.72574	3.70155	TTC19	FALSE	0.142578
5.61853	6.32337	4.14812	6.22265	5.97453	5.9521	5.88313	6.14323	5.49217	5.68398	3.99277	5.37573	4.99277	6.02724	6.09233	5.92955	5.26454	6.15259	5.74631	5.68229	5.67327	6.29425	5.63343	5.77373	5.68538	5.38232	5.61559	6.13955	5.98368	PTBP1	TRUE	0.096676
		2.58976																											DPF1	TRUE
1.9222		3.76341	0.925999	0.111031				0.201634	0.31034	1.67356	1.51096	4.92647				3.41143	3.19849	5.90014	0.632268	4.85449	0.189034	0.495695	0.275007	2.72028	1.14405				SYT7	TRUE	0.918405
2.56803	1.95233	2.7866	2.79286	2.1635	2.7845	2.16993	2.68706	1	2.20789	2.1375	3.26903	2.81352	2.23573	2.18269	2.18903		2.48543	2.37016	2.26303	1.88753	2.05311	2.45154	1.73552	2.14731	2.33056	2.09085	2.1635	2.53605	LARS2	TRUE	0.183278
3.88655	3.33628	4.09508	3.05137	3.30159	4.43962	4.15381	3.84699	3.99729	3.96347	2.90111	4.59276	2.89724	3.35191	3.39506	3.43696	2.82171	3.92884	3.92979	3.43029	2.93734	3.51979	3.93546	3.38543	3.92315	4.29352	4.8268	2.68482	3.35614	PIK3C2A	TRUE	0.152513
2.98003	6.64631		3.28983	2.48543	4.59216	0.565597	1.18903	6.49442	4.87135	2.18587		0.895303	5.63052	3.20633	2.41954	2	4.58376	0.137504	3.0054		2	2.87774	3.41143	4.06005	1.15056		1.83188	5.6522	PLAUR	TRUE	0.580002
	1.83188	5.87578	2.79286	1.90304	2.1177	2.91265								0.0565835			1.99277		1.38957		1.02857			2.48285	3.23419		3.08576	1.48543	ANLN	TRUE	0.585679
3.03034	3.07724	2.9855	0.321928	2.74416	3.39369	2.76341	2.06695	2.89724	3.25399	2.5656	0.0703893	0.604071	2.88362	2.37851	3.54597	3.23879	2.67807	3.52482	0.464668	3.10601	2.98185	2.47768	2.95791	2.71149	3.87086	0.992768		2.93357	WIZ	TRUE	0.412532
3.64501	3.81044	4.7845	3.8339	3.21568	4.69321	4.87627	3.93263	3.50843	3.98185	4.21335	4.17153	2.64155	3.78555	3.79181	4.01257	3.13093	3.92125	4.46336	4.74739	4.05224	2.83996	4.79025	3.84398	3.79909	4.67525	4.75328	3.71918	4.42895	RABGAP1	TRUE	0.147696
9.86302	7.83175	4.57289	9.09598	7.14384	9.63579	10.0162	8.53838	11.0203	11.1889	8.85131	8.27664	7.43413	9.90842	6.98025	11.5568	7.15046	10.623	8.79116	8.74359	6.72014	7.08162	10.4306	4.36737	8.79217	8.64667	4.63923	7.83788	11.1531	DCN	TRUE	0.229599
1.07724	1.07039	0.263034	1.02857	1.66448	1.23266	0.555816	1.4489	0.823749	1.79077		0.411426	1.28096	1.39506	1.45418	1.63691		1.57046	2.488	0.411426	1.91073	1.10434	1.18269	2.3505	1.72247	0.0565835	2.1375	1.22033	1.42761	QPCTL	TRUE	0.472932
4.21956	3.9607	3.6427	3.73118	3.74739	4.42492	3.68594	4.69042	3.56316	3.98641	5.2555	3.97177	4.11437	3.89336	3.89627	3.80632	3.64501	3.849	3.85798	3.49825	3.93923	3.6311	3.86987	3.73552	3.60881	3.33485	3.9607	3.5472	4.27202	PPP5C	TRUE	0.0989736
2.30743	2.33914	3.91361	2.4957	2.16027	3.64386	3.12598	2.73985	2.76341	3.49185	3.06523	2.27798	0.545968	2.59455	3.05137	4.02148	2.26903	2.7761	2.8679	2.96532	2.64616	1.70487	4.05572	2.93923	2.90497	2.62761	2.38681	2.32769	3.2765	CEP68	TRUE	0.258012
3.82069	2.67582	3.74416	3.11603	3.43962	3.84097	3.25096	3.56803	3.24031	3.41143	3.54967	4.58256	3.04614	3.37434	2.12433	3.6893	1.91073	4.23036	3.81044	3.73227	2.73985	3.45418	3.81455	3.06178	3.7939	4.29278	4.15299	2.22959	3.34483	MAP4K3	TRUE	0.185408
	0.704872													0.85599											3.12433		0.321928	0.321928	ZBTB32	TRUE	1.10205
6.37521	7.76454	3.55336	4.73118	5.87086	4.6893	4.55336	3.43696	7.85194	7.0814	4.85699	2.50589	5.08236	7.71576	6.05897	4.58976	3.71039	6.75435	3.98459	3.93074	3.77821	5.53636	4.1914	7.5097	4.85649	4.0365	1.75275	3.87086	6.76792	TYROBP	FALSE	0.319672
4.65535	3.0268	0.356144	4.52042	3.04963	4.25096	5.64703	3.66221	3.57652	5.98003	5.94696	4.06953		3.80219	3.79597	5.76871	1.45418	2.31615	4.16027	4.31107	4.337	2.34767	4.54782	2.69599	4.14323	3.9222	3.48671	4.55582	5.52763	TMEM159	FALSE	0.335684
		3.51854															0.925999												GABRA3	TRUE	0.824923
	1.69599		1.92979	1.39506	0.0976108	0.475085	0.214125							1.07039			0.536053		1.82375		0.333424	0.176323		0.956057	2.86196	3.38819	2.46467		BRCA1	FALSE	0.806207
4.92647	4.27352	4.23726	4.51602	4.43296	4.91409	4.56255	5.08364	4.72955	5.30195	6.2407	3.42761	4.27053	4.81967	4.47768	5.31107	4.82629	4.31034	5.15583	4.16672	5.63198	3.84499	4.64212	4.34837	4.46858	4.45746	4.54844	4.53356	4.75114	ERCC1	FALSE	0.116445
2.9279	6.31452	1.95606	2.92979	0.176323			5.44725		1.61353				0.604071	7.63655	6.31488				1.87578		0.963474	1.03562	6.87799	0.9855	0.432959		7.5938	1.95233	CD22	TRUE	0.838717
5.44328	2.34483	3.81865	2.1177	4.92552	4.15218	2.82782	3.15866	2.19535	3.31034	1.86394	3.08236		4.87922		2.55336	3.56925	4.46205	3.49825	2.05658	1.3505	4.83188	3.14731		4.32409	0.464668			2.30159	SEMA3B	TRUE	0.392473
3.25248	2.27798	3.20477	2.01436	2.09085	3.19849	2.35896	2.50843	2.41684	2.41414	2.1375	3.16832	3.69933	2.18269	1.96347	3.03034	1.93357	2.73769	3.04089	2.36737	2.35896	1.72247	2.91648	2.0072	2.33914	2.09761	3.46858	1.74416	2.60881	MBTPS2	FALSE	0.213444
1.40054	1.79077		0.863938	0.263034	1.76129	2.64847	1.79494	0.575312	1.70044	1.4957		0.650765	1.79494	1.48543			0.823749	0.831877	0.238787	1.32769	0.275007	1.1635	1.23879	1.86394		1.37295	0.782409	1.9782	PRICKLE3	TRUE	0.494673
	5.68004		2.47768					1.4489	1.60881	0.815575	2.24184		1.3505	2.08406		1.96347	1.75702	7.19673	1.42761	9.98382		1.52607	3.59335	7.67207		1.76977	8.67433	0.432959	LTF	TRUE	0.87371
3.88753	2.57289	3.7366	1.91073	2	3.75489	3.32625	2.82375	2.73552	2.73985	3.95047	2.57773	0.594549	2.99095	2.21101	3.20945	2.55336	4.0063	2.35614	2.37573	2.71809	1.83996	3.19377	2.91265	3.13093	3.37851	2.88557	1.70487	3.28244	EXTL3	TRUE	0.272783
4.35614			3.36877	4.1811					2.87971		4.51538	6.24679			3.9991						3.71809								NR1H4	TRUE	0.2406
6.79935	6.04461	5.82553	4.01525	4.06609	5.65163	4.51854	5.55643	7.24603	4.8339	4.11936	4.9397	6.06609	5.35085	6.30998	4.01257	3.33485	4.41414	7.25899	4.33842	4.07125	3.52857	4.82222	5.19692	3.87086	6.52763	4.61412	6.26847	5.0237	ELOVL5	TRUE	0.215924
2.95047	5.74766	0.411426	2.85798	3.10601	1.42223	2.3978	1.97085	4.79649	4.71205	0.879706			5.82579	4.73173	0.389567	2.29572	3.66903	3.05485	1.95977	1.67356	3.26454	2.24793	5.06566	3.29572	0.344828		4.75809	4.77241	ALOX5	TRUE	0.548316
	4.66107		3.83289			3.51223			3.90977								2.9486	4.15543	4.43896		4.60348			4.25248	3.99005		4.45418	4.30961	KDM5D	TRUE	0.120447
5.20555	4.38957	5.62234	4.51096	4.90111	5.07039	5.62761	5.27538	6.0045	6.43196	6.20457	5.16792	4.22574	5.73877	5.12226	5.62936	4.91695	5.43663	5.38267	5.59753	5.56712	4.90207	6.40582	5.40156	5.17951	4.75435	4.79961	4.95699	5.61794	CALCOCO1	TRUE	0.103631
3.18269	3.41549	4.19377	4.05658	3.42358	3.95513	3.7137	3.6427	3.18269	3.45681	3.92884	3.92125	2.97453	3.30159	3.69042	3.79597	3.62176	2.81762	3.63807	3.849	3.08576	3.29866	3.58135	3.3505	3.68594	4.47314	3.8953	4.46205	3.63807	UBR7	TRUE	0.111035
3.43429	3.47508	4.35191	3.46989	3.0993	4.57592	4.10685	3.89433	4.41007	3.9222	2.25399	3.46597	2.11103	4.00988	3.32481	4.26679	2.80116	3.94017	3.90014	4.20006	3.39369	3.38128	4.72083	3.53854	3.68032	3.02857	3.81762	3.4019	3.79909	MAP4K5	TRUE	0.168812
3.07211	2.5509	4.70819	0.978196	0.189034	2.58015	4.50398	2.16027	0.536053	2.57046	4.0781	3.60881	3.46858	2.29572	2.67807	1.81147		3.15543	2.43029	0.790772			2.10434	2.87381	0.124328	0.956057	0.163499	3.35332	2.87578	EHD3	TRUE	0.564724
4.96255	5.3733	4.62527	5.42391	5.03254	5.38647	5.17592	5.30779	4.94111	4.92172	5.94134	5.37365	4.97911	4.95559	4.87381	4.56925	4.26228	4.96578	4.96116	4.99458	4.37156	4.9514	5.14364	4.65191	4.72192	4.56803	5.49153	5.36632	5.26379	PSMC4	TRUE	0.0730174
3.2765	3.34341	2.69377	2.64847	3.36036	3.33056	3.08916	2.9241	3.35896	4.04352	3.01078	2.5008	3.5509	3.61824	3.65421	4.55582	3.5097	3.68032	3.90881	2.23879	3.70929	3.14568	3.0321	3.8885	4.14323	2.30743	3.41414	2.41684	3.8268	MAN2B2	TRUE	0.17268
1.40054		2.68032																											SLC7A14	TRUE	0.443507
0.226509	0.695994	4.31832				1.9486		3.3799	5.07125						5.36142		0.956057	2.41414		1.0072		0.454176			6.36737			2.53107	CLDN11	TRUE	0.771523
5.46858	5.04089	3.66903	5.57228	5.85425	5.09466	5.59036	5.44659	4.42828	5.66164	5.25701	4.90352	5.17153	5.06307	4.92315	4.60585	5.97865	5.30159	5.68454	4.7845	5.478	5.54102	4.36597	4.96763	5.35509	5.21568	5.4002	4.38405	5.23036	SLC25A39	TRUE	0.0985131
6.16068	6.29205	2.78031	6.38716	6.79312	4.70321	5.18388	5.13381	5.65048	6.32229	4.41143	4.63865	4.0009	6.23764	5.92861	5.72137	4.90256	5.33628	4.765	5.71836	4.47314	6.98687	5.54813	5.92884	6.43162	5.02503	3.97085	4.62819	5.87553	MVP	FALSE	0.178367
5.17193	5.50557	4.59395	4.7301	5.56529	4.94767	4.85848	4.70044	4.52607	4.84046	4.68201	4.8125	4.37434	5.13955	5.67497	4.95047	4.57713	4.88118	4.70598	4.78188	4.82222	5.5472	4.73931	5.65105	5.05658	5.13791	5.23993	5.05311	4.93923	NUB1	FALSE	0.0703304
4.13258	3.6792	3.82883	3.80529	2.98368	4.27426	3.30159	3.774	5.07639	3.90785	2.15704	3.17473	4.0798	3.5472	2.92979	3.65421	3.61117	4.36947	5.29315	3.47119	4.39506	3.36036	3.20633	2.40054	4.79701	4.74792	4.89385	3.34908	4.23802	PGM3	TRUE	0.198227
2.20163	0.31034	2.66903	1.01436	0.948601	1.45943	0.443607	1.9222	1.08406	1.9782	1.20163	1.63227	0.773996	1.0635	0.879706	1.45418		0.739848	3.43429	0.925999	1.54102	0.555816	1.61353	1.05658	1.14405	2.47768	2.79909	0.782409	1.45418	RWDD2A	TRUE	0.537102
6.79844	5.10685	4.36247	4.44294	4.69265	4.94579	4.28318	4.69822	4.40531	5.9397	4.51979	4.6153	4.73985	4.95047	4.91934	5.90352	4.60051	5.1534	5.66959	5.32048	4.28096	3.83693	5.77742	4.97407	4.36947	4.29572	4.0072	5.55735	5.97591	CLK1	TRUE	0.140181
2.02503	1.51602	1.66448	1.75275	1.26903	1.95977	2.12763	2.16672	0.367371	1.07724	1.76129	2.68032	2.68706	1.73985	1.52607	2.09085		1.79494	1.71809	1.79494	1.81147	0.443607	1.48543	0.575312	1.28688	1.69599	2.46467	1.87971	1.48027	POLR3B	TRUE	0.341651
3.45022	2.98368	4.77558	3.19219	2.36737	3.15381	2.28688	3.01614	2.12763	3.39232	2.45154	2.848	1.64155	2.55336	3.34483	3.62761	4.4121	2.67582	2.63691	2.88557	3.35332	2.16027	3.87971	4.23802	4.37365	4.77347	2.88362	2.852	2.60881	ANGEL1	TRUE	0.256983
5.46401	4.44626	4.90256	5.07639	4.80426	5.21335	5.0054	4.64443	4.75649	4.55029	5.69905	5.87922	5.68342	4.68818	4.21257	4.51854	4.0321	4.87971	4.87529	5.05094	4.39917	4.58316	4.83188	4.30232	4.74524	6.14975	5.77716	4.67016	4.94673	RNF14	TRUE	0.106089
3.57168	3.38128	1.25701	3.72137	3.51223	3.03386	3.17153	3.58856	3.7666	3.9782	4.48543	2.96347	2.56071	4.14893	3.44228	3.4019	2.26604	3.52607	3.47249	2.80735	3.32912	3.0018	3.26153	4.14323	3.6893	2.34767	3.56194	3.28983	4.43896	DNASE1L1	TRUE	0.20103
	2.69822	2.65764	2.31325	0.15056	2.18269	0.85599	1.33342		1.82375				0.31034	3.32337	2.82579		1.37851	1.99639	2.69599		3.59335		2.38405	2.7866	3.68482		2.57773	1.95606	DDX11	TRUE	0.450577
5.79155	3.7666	3.34908	5.41447	7.5766	4.93734	4.72137	4.57168	5.0492	5.07895	5.08704	5.62381	6.59634	5.41684	3.76871	5.76341	5.16712	4.61471	5.0045	3.91361	4.54288	7.34225	5.01614	4.93216	4.16752	4.49249	5.92884	4.06609	5.05528	HEBP1	TRUE	0.193376
1.36177	2.99458		5.27277	3.55949	0.31034	2.70708		6.06286	4.23802		2.01436		7.24536		3.42492		4.03914	0.799087	5.14853		3.62994	2.33914		4.34837		5.59066	1.15704	5.36702	GPRC5A	TRUE	0.527326
0.584963		2.28983			1.53605	0.659925	0.871844	2.32481	0.831877					0.505891	3.25096		0.978196	0.933573				2.12433			3.5097			1	MAMLD1	FALSE	0.654242
0.505891	3.904		1.33342	1.75275			0.584963	0.641546	2.0036				1.78241	4.85798	0.475085				0.933573		2.34483		3.87774	1.4489			3.88069	2.0321	CD6	TRUE	0.691838
1.39506	4.55213	0.422233	3.68032	3.12433	2.48027	2.10769	0.378512	2.31615	2.38128	1.19535			2.46728	4.20085	0.0565835		2.52857	0.400538	3.09255		2.61589	0.847997	3.53605	2.71809	4.41414		5.24945	2.66221	TACC3	TRUE	0.580854
4.14568	4.09001	4.14241	3.83491	4.17393	4.11603	4.20085	4.17393	3.17951	3.76129	3.99458	4.24031	3.9991	3.80323	4.11603	3.78346	3.63459	3.854	4.42626	3.98185	4.04089	4.20945	4.0009	3.83592	4.36947	3.87086	4.65992	4.04789	3.9607	UFL1	FALSE	0.0675248
1.23266	2.60644	0.454176	4.19219	2.05311	2.10098	2.04614	2.80735		0.367371		2.11437		2.5656	2.95047	1.83188		2.36457	0.516015	2.85	0.790772	2.78869	3.31325	2.53854	2.12433	2	1.20789	4.26228	1.61353	POLA2	TRUE	0.477776
1.31615	2.04614	1.83592	0.713696	3.28688	1.71809	1.54102	1.59455	2.55336	2.04614	1.63691		0.650765	1.70929	1.88753	2.28392	2.0036	1.87971	2.14731	0.879706	2.30159	3.19535	1.43296	2.40327	2.81762	2.62761	0.773996	0.263034	1.67807	ZC3H3	TRUE	0.405615
4.59455	4.9486	4.2032	5.41143	5.91265	5.40293	7.03683	6.33092	4.88069	5.68342	4.95606	4.37712	4.6792	5.615	5.01792	5.06437	5.16511	5.49378	5.59664	4.75809	5.68426	5.64357	4.80839	5.07082	5.70984	2.57046	5.12391	5.42727	5.66363	CAPN1	TRUE	0.1486
1.76977	2.72247		0.411426	0.604071		4.17632	0.0840643	0.124328			4.33985		1.87578				2.77189	10.9877		2.37573				1.27501	0.555816	0.555816	2.65764	0.0565835	ACPP	FALSE	1.20563
7.22149	6.01725	6.90533	7.23554	6.82069	6.36212	6.31723	6.5373	6.68566	5.99977	10.1853	7.85181	6.96751	6.06264	5.88044	5.59186	5.16672	5.87946	6.39318	7.28928	6.14098	6.5306	6.4002	5.52544	5.84147	6.20887	6.54844	7.0376	6.73823	MDH1	TRUE	0.139767
4.61235	3.46205	4.70819	4.6011	4.44095	4.38819	4.17792	4.66562	3.44626	3.61235	4.53854	5.56803	3.65421	3.851	3.31325	3.91934	3.97453	3.83592	4.393	4.27501	4.12598	4.22265	4.08916	3.30451	4.43229	3.76553	5.12143	3.82985	4.09508	SLC30A9	FALSE	0.127507
2.79494	0.454176	0.432959	4.77716	4.19771	2.41684	2.19219	1.30451	1.58496	3.70266		2.57289		1.80735		3.92029		1.76553	1.20163	4.08576		4.41007	3.77505	0.765535	2.15704	1.926			2.18269	MTMR11	TRUE	0.532779
4.5601	3.66334	4.10098	4.48027	3.83996	3.86592	3.83693	4.28983	3.51854	4.04352	4.17792	4.84348	4.59276	3.51475	3.91073	4.15462	2.91839	3.47249	3.97361	4.32193	3.43829	3.82375	4.17153	3.91073	4.21645	3.77716	4.34979	4.39575	3.63807	COX15	TRUE	0.104324
0.344828	3.98459		2.32481	3.25096	0.9855	1.38405	3.7939	0.226509	2.83592		0.594549		2.62293	4.73823		1.70487	1.19535	2.94298	1.62761	2.21723	3.62293	0.659925	4.06523	3.18269	3.12598		3.6837	3.05137	CCDC88C	TRUE	0.540618
3.09592	3.0197	4.45878	2.26003	2.91456	4.0072	2.926	2.87774	2.41414	3.9241	5.50048	2.82579	2.27501	2.27501	3.45812	2.83794	3.29278	2.64616	2.9241	3.05485	2.28392	2.3978	3.18269	3.23879	1.72247	3.45022	3.78346	3.22959	3.46467	YAF2	TRUE	0.24533
5.03034	4.58496	5.90014	4.61589	4.60466	5.66619	5.5738	5.2502	4.62117	4.82324	5.26491	5.62761	4.26679	5.11728	4.67299	5.4165	4.70377	4.74255	5.34163	5.26416	5.01659	4.52795	5.6642	4.68257	5.27761	5.07938	6.40242	4.32193	5.44526	ZMYND11	TRUE	0.0996298
2.23879	5.27053	1.3505	1.69153	2.60881	1.32193	1.16993	0.604071	4.01792	2.40599	0.526069		1.52607	3.2765	4.84398	0.903038		2.82375	0.933573	1.33914	0.748461	2.79077	1.33342	5.13381	1.97453	0.0703893		4.46728	2.63227	WAS	TRUE	0.669851
1.80323				6.09508					1.74416		5.9644					7.92979					7.15583				5.15623			2.1177	DPEP1	TRUE	0.528258
2.71149	4.90111	4.50144	3.12267	3.23573	2.51602	1.9782	1.85997	2.88166	4.25927	2.24489	1.83188	3.56194	3.68706	4.06178	0.124328	1.70929	2.80323	2.852	2.69599	2.46205	3.7761	2.21412	4.4019	2.43829	0.713696	1.29278	3.10769	3.93074	BID	FALSE	0.401854
6.765	6.67638	7.28031	6.67214	5.96671	7.15755	6.58661	7.02713	6.42978	6.45894	6.27929	7.1917	6.22284	6.58316	6.85748	7.07017	5.84021	6.47573	6.5404	6.72069	6.01123	6.19239	7.07436	6.55228	6.29186	6.92647	6.9689	7.17393	6.54674	MATR3	TRUE	0.0590469
				5.06824					2.02148			3.61589									5.95629								NPC1L1	TRUE	0.413977
2.82579	2.45943	1.62761	1.41684	2.19535	2.76553	1.80323	2.41414	1.46989	3.04439	2.13093		1.28688	2.25399	2.89918	3.35191	2.95047	2.9486	3.61941	1.90304	3.0197	2.42492	2.50335	2.80735	4.18745	2.9222	1.79909	0.863938	2.72028	XYLT2	TRUE	0.305847
2.02148	1.76553	2.55336	1.95606	1.67356	2.45154	1.852	2.26903	2.852	2.02857	2.07382	2.30451	1.38405	2.1635	2.59216	2.78031	2.30159	2.51854	2.62059	2.51854	1.95977	1.89918	2.44095	1.82782	2.37016	4.15218	3.0036	1.64616	1.8679	RGPD5	TRUE	0.235455
2.69822		6.10518																	0.650765										STMN4	TRUE	0.874313
0.687061	0.0285692	2.27798	0.632268		0.799087	0.757023	1.09761	0.918386	1.10434	2.34483	0.918386		0.454176	0.782409	1.17632		0.176323	0.31034	0.594549	0.575312	0.176323	1.1635	0.475085	0.757023	0.695994	0.321928	0.321928	0.871844	NUDCD3	TRUE	0.697301
1.09085				0.495695												1.81967	0.847997	3.22651	1.4957					3.98641	0.9855				ISL1	TRUE	0.707667
		2.48543	2.90304	2.67582	1.66903		0.613532		1.5008		4.50779	2.99095	1.03562			2.73985		3.10769	2.22033	3.28096	2.76129	0.799087		3.24945	1.13093				CHDH	FALSE	0.453243
2.64386			1.32769	0.526069	2.46467	1.09761	4.38543		1.97085				2.54844		1.36737	1.80735		3.12433	1.32193	2.96901		2.44361		2.58015	0.871844		1.02857	1.0635	IL20RA	TRUE	0.5031
	4.45154		9.6694	9.62825				0											4.58316		9.31712	4.96394		1.98185	0.475085				CLCA1	TRUE	0.763401
	3.18587	1.52607	6.57894			7.62659													5.11811			1.98185					4.851	4.35896	CLCA4	TRUE	0.48144
5.45319	4.15299	4.8674	4.76022	4.33628	5.51065	4.07211	6.02879	4.23879	5.30597	4.36177	5.51412	6.30524	4.74792	4.41143	5.56255	3.90497	5.63604	4.90593	4.95513	4.45088	4.40259	4.93357	4.33985	4.62293	5.55213	6.03232	4.73985	5.48768	GLT8D1	TRUE	0.131421
4.95327	4.55888	5.0505	4.81967	3.99186	4.93121	4.29866	5.01302	4.53294	4.66107	4.70598	5.31325	4.16672	5.68229	3.62761	4.25852	3.67016	4.67186	6.86913	5.23419	4.3978	3.97728	4.65363	4.03298	4.63981	4.86542	4.86938	4.54473	4.68594	ATP2C1	TRUE	0.135292
1.53107	4.66164	0.0143553	2.04264	1.90304	6.94052	3.20633	2.42761	6.49905	5.14078	2.84599	0	5.02281	2.72247	2.83188	3.20789		4.19061	4.57107	2.09424	2.41143	1.07039	3.71918	2.848	2.20163	3.10434		0.831877	5.29131	IGF1	TRUE	0.57419
0.15056	2.72465	3.88753	3.92315	3.37712	2.62059	1.62761	2.16027		1.9855				3.62059	2.62293	0.807355	6.988		0.422233	1.80323	2.87578	3.16027	1.28688	1.8679	2.52356		1.46467	2.37573	3.15056	SLC38A5	TRUE	0.569527
4.10936	4.11686	4.03738	4.13175	3.81147	4.2817	5.14486	4.28836	3.81558	4.14568	4.34767	5.08916	3.51349	4.16752	3.852	4.26003	2.76553	4.50589	4.42358	4.37086	3.76871	3.83289	3.99639	3.95977	4.64616	3.83491	4.0063	4.15381	4.29646	RALBP1	FALSE	0.107794
5.07553	3.67356	6.02459	3.34056	3.03914	3.62877	4.03914	3.18587	3.46597	3.61117	2.67129	3.95699	3.26604	4.12681	3.85	4.21956		3.45549	4.24489	3.86493	3.37016	3.54597	4.49697	4.46074	4.01167	5.36247	5.20124	3.42761	3.58736	RUFY3	TRUE	0.192323
5.12516	0.454176	6.60095	1.07039	0.250962	3.66221	3.56803		1.5008	4.08491		3.6427		1.60881	2.3978	5.66846	2.1635		3.39094	1.18903	1.48543		2.09424	3.21568	2.10434	3.5097		0.815575	4.23879	CNTN1	TRUE	0.608518
1.23266	3.91169					0.933573		4.67694					4.66676				1.7137						3.08406					0.678072	SLC11A1	TRUE	0.641641
3.57168	4.38198	4.06091	3.40599	2.85798	5.06221	5.73823	3.24641	4.87725	4.70377	3.98277	5.70127	3.12763	5.18864	2.58736	5.16952	4.89676	5.36982	4.55459	4.62352	4.30889	2.28096	5.22265	4.337	3.51728	3.52482	4.13422	2.97085	5.33593	WWTR1	TRUE	0.228524
2.9279	3.13422	2.81147	3.62293	2.65992	3.93074	3.26454	2.58976	2.87578	2.22342	2.61589	3.47379	3.24793	2.926	2.57773	2.53854	2.02857	2.90111	1.73118	3.47249	1.97085	2.81147	3.40327	2.43296	3.15704	3.26153	3.15381	2.81558	3.0036	AGPS	TRUE	0.176284
2.62527	2.42492	2.72247	3.13258	2.40871	2.926	2.57046	2.89724	2.31325	1.90304	2.41414	2.93734	1.49057	2.82782	2.45681	2.98732	1.62761	2.79909	2.74416	2.26604	2.7137	2.23266	2.85599	3.03738	2.70266	2.85798	2.97085	2.97085	1.56071	CXorf56	FALSE	0.175147
1.82375		7.65062	2.43029	2.08066	1.61353	4.50335		3.45286	3.48414	6.16189	1.17632		0.238787		2.57773			3.33485	4.28762	0.545968	0.887525	2.73769	0.389567	0.695994	3.1811			3.78555	ATP1A2	TRUE	0.704984
2.62059	2.81147	2.12763	3.68145	2.36737	3.17153	3.17792	3.21723	1.94486	3.61471	4.40259	3.51728	2.43829	2.65076	3.6837	3.00899	1.72683	2.78241	2.68032	3.08576	2.84599	2.488	3.38819	2.72465	2.88753	2.83996	3.15543	3.29719	4.4019	TTC27	FALSE	0.20906
	0.124328	1.14405			1.75702		1.4957			0.847997	0.443607							1.76553				0.495695	1.14405		2.27798	2.29572			ZNF582	TRUE	0.586306
	0.422233		6.55428	0.0703893	2.64155	3.60881	3.79805		5.16993		0.422233		5.17911				0.584963	4.92837	6.3818	1.82782	0.765535	3.31325		8.54295		1.43296		4.66676	VSIG2	TRUE	0.746295
3.10936	3.27501	5.50843	4.34554	2.9782	5.11936	3.26604	3.68145	6.37747	4.94579	5.38163	4.18269		4.50335	2.67356	4.58015	3.61706	4.58916	4.09508	4.95559	2.27202	2.57289	5.20672	3.75489	3.36457	3.21878	3.72901	1.53107	4.37573	PHLDB1	TRUE	0.277275
6.10518	6.22497		1.35614	0.871844		1.63227		7.25058	2.32769			5.67638	7.34003	4.56316	2.50843		0.823749	0.238787					1.25096	0.124328	0.739848			3.09085	MARCO	TRUE	0.835794
											2.14078	1.30451																3.53356	CYP24A1	TRUE	0.484053
0.871844		1.69599			2.80529	2.0321	1.99639	0.536053	0.739848	1.29278	0.516015		1.70487		2.72465		1.5008	0.641546	0.214125	0.879706	0.250962	2.71809	1.21412			1.48027		1.76553	PRDM11	TRUE	0.585932
2.09424		3.85499	3.76341	3.47119					4.21257		2.67582					2.45154			3.30743	1.13093	3.1177	0.15056		3.0268					SYT13	TRUE	0.425925
3.04264	3.37295		4.07125	1.49057	5.43463	3.5435	1.51602	4.82426	3.98277	1.84398	3.79286	1.69599	3.12102	1.57531	5.29205	1.7137	3.38267	3.58856	2.50335	3.28096	1.65535	5.51286	3.01792	2.20789	1.9222	1.54102	2.74201	4.10434	SNAI2	TRUE	0.411662
10.6409	11.0191	5.76102	9.72972	10.5673	8.88893	8.7739	10.5093	10.6504	10.3945	7.96382	8.78963	8.76497	11.4129	11.6839	9.22932	7.91439	8.47354	8.45935	9.17258	9.56322	10.7909	9.48629	11.8301	9.65516	7.58676	7.23199	11.8354	10.6421	CD74	FALSE	0.155612
3.5509	2.11103		0.137504		0.475085	1.07724		1.31034	2.67582		2.28688	2.26003	3.10769	0.286881			7.20349	1.774	0.713696			1.18903	1.74416	0.748461	0.613532			3.0036	HGF	TRUE	0.856799
4.0993	2.46205	3.59455	2.34483	2.19849	3.22651	3.2032	2.51854	3.17153	3.0054	3.23879	3.22651	4.01167	2.71809	2.84599	3.74093	2.12102	2.75702	2.5008	3.02148	2.65076	2.27501	3.62293	2.5656	2.49825	3.69042	2.70929	2.77189	2.88557	ZRANB1	FALSE	0.182997
3.81865	2.53356	5.48478		1.40054	2.96347	1.848	2.852	2.14405	3.24793	3.8885	0.879706		2.15381	2.60407	3.61235		1.99639	3.22497	0.659925	2.52356	0.970854	2.48027	2.57531	2.44095	2.94486	2.63923	0.62293	3.0072	NCDN	FALSE	0.432754
2.09761	3.15056	0.536053	2.19535	2.52105	4.47249	4.48349	2.98003	3.76129	4.68089	2.59694	1.67356		3.30451	2.854	4.43029		5.18349	5.0365	2.81967	1.99277	2.16672	4.31976	3.46728	3.05832	1.926	1.66448	1.01436	4.79597	ADGRA2	TRUE	0.413469
1.51602	1.32193	2.04614	0.9855	2.01792	1.96347	1.86394	1.76553		1.9222	0.516015	0.632268	0.933573	0.713696	1.75702	2.54844		1.07039	2.30159	1.15056	1.17632	1.4489	1.41143	1.49057	2.21412	1.92979	1.53107	1.04264	2.0635	ZFP64	TRUE	0.3519
4.3799	3.37295	4.27798	4.09339	3.45286	5.04832	4.47962	5.48543	4.21956	4.42358	5.07895	4.74846	4.19771	3.7939	3.89045	4.10182	2.9782	4.15866	4.1334	4.393	4.2502	3.54967	4.32553	3.13258	4.07039	3.96993	4.65707	4.55582	4.56803	MNAT1	FALSE	0.133446
1.25701	2.53605	3.06523	0.411426	0.925999	3.92125	3.06867		3.74631	2.03914	4.97865	1.45943	2.19219	2.87578	1.87971	1.43829	1.87971	3.89239	2.42492	3.11103		0.669027	3.22959	2.21101	0.422233	4.64386	1.5656	1.32769	2.89142	SAMD4A	TRUE	0.518396
0.163499	4.49185		1.45418	2.01792				1.87971	2.0321				2.91648	4.849			0.333424	0.0565835	1.34483		2.71589		4.93876	1.7137	1.18903		4.54226	2.52356	RUNX3	TRUE	0.693976
2.39232	2.63923	1.81558	2.60644	1.83188	2.50843	1.91839	2.4957	2.37851	1.5656	0.604071	2.18587	0.495695	1.81558	2.75275	2.18269		2.37295	2.57046	2.94111	1.80323	1.81558	2.90689	3.04789	2.61117	2.93734	2.34767	3.47249	1.84398	MRE11A	FALSE	0.296267
2.10098	2.51602	8.12779	3.25399	2.80323	1.65992	1.57531	4.337		3.53107	3.28983	3.48285		3.43296	3.33771	0.0565835	3.38405		3.25852	3.24945	5.11686	2.848	1.05658	1.60407	4.48993	2.71149	2.26604	2.32481	0.594549	PLEKHB1	TRUE	0.536336
4.9855	6.0594	1.57046	6.26978	6.8586	3.62176	8.5127	5.17552	5.28873	4.96394	4.06005	3.71039	3.50716	5.45352	5.1416	3.79597	6.29425	4.58075	3.03914	5.4614	4.59872	6.27594	4.11686	4.91409	6.23304	2.87578	4.93452	6.60629	4.85699	SERPINB1	TRUE	0.284832
												5.63952																	CYP3A43	TRUE
				5.98185							5.29536	3.64386									5.27836								SLC7A9	TRUE	0.196632
2.52857	2.5509	3.54102	2.34483	2.35896	3.0635	2.34199	2.61589	1.848	2.20477	0.495695	2.16027	2.34483	2.44095	2.61824	2.72683		2.31034	2.27501	2.63459	1.64155	2.93734	2.43829	2.40599	2.61589	3.21412	2.7866	2.58976	2.21101	SPAST	TRUE	0.221334
1.96717		3.15704	0.333424	0.454176	2.1635	3.08576			1.30451				0.189034					0.757023	3.07382			2.47768	1.926		0.367371			3.0018	NRXN3	TRUE	0.661449
1.51096	1.73985	1.57531		1.23266	2.30451	1.38405	1.1177	1.1375	2.31034	0.992768			2.0635		2.22033		2.07382	3.69153	0.124328	2.87774	1.31615	1.36177	2.92029	1.15056	0.0426443			1.81558	OSBPL5	TRUE	0.510466
2.94673	3.23419	2.94673	3.11437	2.79701	3.09761	2.99458	3.25096	2.53356	2.44626	1.76977	3.28096	2.45154	2.55336	3.32193	2.72247		3.0993	2.65764	3.05137	2.62761	2.57046	2.99277	2.90111	2.9241	3.46597	3.16832	3.38128	2.63227	AQR	TRUE	0.127092
		0.344828		7.62139	0.176323	0.333424		0.604071	0.422233			9.88629			2.11103						6.99005	0.0703893			2.61117				CPS1	TRUE	1.26469
												9.05523	2.86987																C8B	TRUE	0.73353
5.3733	5.83491	6.84172	6.17712	5.95513	7.5051	8.57452	5.27947	10.0567	7.12153	10.5673	5.30268	4.37712	7.53598	5.19613	6.47346	4.38612	6.07575	7.2948	8.11239	3.89433	5.63401	8.4582	5.17672	5.8775	6.1807	6.71576	4.08831	9.03897	FHL1	TRUE	0.261019
5.93664	5.897	6.15178	5.52638	5.65076	5.6837	5.70099	5.8268	5.56712	5.50906	6.08066	5.36527	5.24641	5.81096	5.38232	5.70625	5.06307	5.57319	5.54813	5.49538	5.16189	5.48317	5.77558	5.60318	5.44791	5.98413	5.47444	5.82426	5.76951	RTFDC1	FALSE	0.0461074
0.0840643		4.44626																											GABRA1	TRUE	1.36173
	1.37295		2.848	1.23879	0.831877		1.67807						1.09761	1.36177			4.17871				0.83996		1.4957		3.55827	2.1375	3.33771	1.98914	NLRP2	TRUE	0.53711
	1.51096	0.632268		0.545968	1.23879		2.14405	1.48027	1.4489	1.22033	1.11103		1.74846	1.23879	0.0565835	1.48027	2.04963	2.0036		2.37295	0.137504	0.263034	1.23879	3.50208	3.21412	0.910733		1.53605	SLC45A4	TRUE	0.603372
5.92291	5.68426	5.13093	6.26978	5.66448	5.61294	6.31506	5.3067	5.56955	5.67327	6.80323	6.19397	5.16027	5.78398	5.15826	5.4219	5.14649	5.47671	5.63517	6.05961	5.39129	5.75836	5.83946	5.20711	5.5245	6.41684	5.93499	5.84273	5.98322	RNF10	FALSE	0.0733373
2.19219	1.67807	2.18269	0.505891	2.15381	1.56071	1.79077	2.53854	1.78241	1.37295	1.95977	1.20789	2.15056	1.31615	2.76129	2.13422		1.77821	2.92029	2.22033	1.80735	2.20163	1.80323	2.65992	1.78241	4.25248	2.29572	2.06695	1.46467	ZNF839	FALSE	0.331515
4.0798	4.32984	3.67243	4.48091	5.13873	4.0798	3.72574	4.13668	3.49313	4.23802	3.2765	4.76075	4.17073	3.854	4.20398	3.88166	3.16027	4.18428	4.22728		3.65191	5.15421	3.82069	3.94392	4.40599	3.88264	3.99005	4.36597	3.80941	ZDHHC6	TRUE	0.114115
5.47411	1.69599	3.62059		4.6792			1.17632	0.226509	3.06867		3.50589			1.04264	3.10769		1.02857				4.19928		0.641546	3.83188	2.52857	0.62293	1.02857		GRAMD1B	TRUE	0.665244
5.92362	5.34625	4.91743	3.09424	5.35332	5.68454	5.77162	4.8212	5.51412	6.29315	5.72192	3.02503	4.31759	6.47508	5.15299	6.18408	5.15623	5.80916	6.01725	2.52356	5.90929	5.28429	3.79181	5.54813	4.93734	5.54102	4.99684	3.16511	6.24926	RNH1	TRUE	0.207319
6.03452	4.44029	5.14527	6.01458	5.62088	4.35685	5.29315	4.80271	4.7137	3.91456	7.37365	6.61088	6.29389	4.42492	4.15056	3.6241	3.48543	4.48543	4.25701	5.51381	4.60348	5.22419	4.71864	4.10685	4.6311	5.01659	5.12681	5.02547	4.40531	NDUFS1	TRUE	0.180645
4.03562	3.33771	4.34199	3.27798	3.21101	3.77189	3.92029	3.73227	3.56682	3.67807	4.40054	3.77189	3.27798	3.37156	3.72792	3.93829	3.19061	3.41684	3.55336	3.52356	3.30012	3.54967	3.96347	3.33342	3.26903	5.03342	4.34908	3.23419	3.58736	RB1CC1	FALSE	0.11901
3.67469	4.05918	2.96162	4.11936	4.04789	3.84699	3.64501	3.81865	3.61235	3.50843	3.56071	4.02326	4.54473	4.04527	3.6837	3.16511	3.72574	4.52607	4.1416	4.18587	3.90977	4.24108	3.65992	3.76022	4.20555	3.60288	4.67864	4.02591	3.90785	ERP44	TRUE	0.0976937
9.13127	4.13914	3.81147	5.11811	4.95233	3.98823	4.60407	3.57168	4.31976	4.37295	6.46418	4.75542	8.42366	5.48896	4.03738	3.50335	2.96532	4.52231	4.26754	4.74524	5.13627	4.99684	4.02326	3.55336	4.73715	4.34979	3.3978	4.33557	4.75168	ALAS1	TRUE	0.283208
2.72247	6.3799		4.0993	4.25399	1.848	2.80735	2.46205	2.72247	3.75702		2.25399	1.72247	3.48027	6.57894	2.05311	2.06695	2.35332	2.47508	3.91839	2.80529	3.56682	2.24489	5.65821	4.06005	3.08916		6.57304	3.9991	BIRC3	TRUE	0.418928
3.79597	3.43296	4.37365	2.70487	2.57289	3.66562	3.42895	3.15543	2.65992	2.98185	2.45943	3.58135	2.23573	2.96901	3.92315	3.59335	2.0036	2.65992	3.0036	3.26754	2.39506	2.52607	3.50716	3.52982	3.28983	4.16752	3.70929	3.19535	2.6017	AKAP11	TRUE	0.189207
3.60407	3.07039	3.03034	3.46205	3.2765	3.03738	3.31325	2.04614	3.15866	2.43296	4.39643	3.08066	3.16189	2.68257	2.36457	2.03914	2.68257	2.75061	4.75809	3.40599	2.88166	3.20006	2.55336	2.58256	2.96532	3.96255	2.93734	2.44095	2.97636	GLRX2	TRUE	0.20088
2.23879	2.95606	1.78241	1.11103	1.57046	2.40054	2.39506	2.93923	2.02148	2.53854	2.59694	2.43296	1.1375	1.93734	1.9222	1.30451		2.5008	2.49313	1.7866	1.79077	1.60881	2.03914	2.27798	1.57531	4.31759	2.53854	2.36177	2.42223	SNAPC1	FALSE	0.297456
4.04177	4.16108	4.07211	5.52011	5.55182	4.19613	4.61706	4.29499	4.43162	4.19219	4.30743	5.80452	6.32966	4.5472	3.75382	2.3978	3.64962	4.42895	3.67356	5.31506	4.21723	5.91241	4.47314	3.76341	4.52732	3.08576	4.97774	4.36387	4.15947	DERA	FALSE	0.189963
6.05961	5.76129	5.92576	5.72301	5.29241	6.15603	6.01056	5.44956	5.91456	5.13791	6.20301	6.07532	5.77294	5.50653	5.02989	5.17752	5.43929	5.55827	5.24451	5.53263	5.25096	5.17911	5.43196	4.85549	5.08406	5.99887	6.43379	5.82451	5.67412	STRAP	FALSE	0.0723292
				5.32445					4.05485		4.12184	6.0119									5.27016								ABCC2	TRUE	0.170513
1.7137	4.43829	0.485427	2.26303	2.93357	1.17632	2.80941	0.62293	1.97085	2.85			0.887525	2.56071	4.9991	1.03562	2.33914	2.7845	3.28392	2.12763	3.14405	3.15543	0.62293	4.66676	2.93546	2.87774		4.42694	2.78031	DEF6	TRUE	0.495748
4.03386	5.34376	3.00899	2.46728	3.73552	4.34341	4.03474	1.7137	4.07639	4.82069	5.35191	0.823749	1.7866	4.1643	4.95	4.03914		3.73444	3.53854	4.22959	1.79077	3.19219	4.52356	5.42828	2.71809	4.8339		4.0321	5.1206	PLEKHO1	TRUE	0.326181
3.57773	2.48543	1.40054	2.72247	3.84699	1.99277	1.73552	4.53481	4.00809	3.31179	1.91456	3.10098	3.7666	2.10769	1.65992	1.22033	1.8953	2.60407	1.96347	2.0036		3.61706	1.31034	2.25701	2.27798	1.71809	4.09424	2.78031	1.99277	GCLM	FALSE	0.367135
3.20789	3.26754	2.90689	3.23266	3.38681	3.03386	2.85798	2.81147	2.65992	2.81762	2.85798	3.5656	3.50589	2.84599	3.36317	3.21412	3.04789	3.12598	3.06005	3.66903	2.8339	3.50716	3.35332	3.54844	3.40599	2.60881	3.3978	2.85997	2.75916	UBR2	TRUE	0.0972034
4.43229	4.44361	2.32769	3.30889	3.49442	5.32337	5.26379	3.1375	6.12536	5.32733	4.50526	2.38957	0.903038	5.91433	2.7866	5.40565	3.3505	5.36142	4.69599	4.29866	3.56438	2.83794	5.48671	4.76182	3.64847	3.51602	3.33485	2.57289	5.75141	EHD2	TRUE	0.316817
	0.286881		1.37295	0.933573		0.0285692											0.298658		0.632268		0.659925			0.275007	2.13422		1.60881		DEPDC1	TRUE	0.830773
5.23649	4.01525	3.38405	4.34127	4.44095	3.39094	3.60526	5.35544	3.71149	4.75275	3.51096	5.40905	5.04963	4.19613	4.37016	3.71589	4.34554	4.57592	4.30378	4.59932	4.88606	4.49313	4.06005	4.42828	4.46793	4.46532	5.05528	4.7148	4.39232	CCDC28A	TRUE	0.127486
3.00899	0.111031	4.62936	0.565597	0.378512		2.98914	4.38128	2.02148	1.91456	4.60466	4.38612	0.695994	2.41143	0.226509	0.238787		0.0426443	2.51096	0.163499	5.1815	0.367371		1.23879	0.263034	3.01792	5.74927	0.739848	1.78241	RRAGD	TRUE	0.88836
3.34483	2.55827	3.40054	2.26003	2.71809	3.39232	2.36457	3.40871	1.91073	2.64847	3.29278	2.41954	1.58496	2.59455	3.17153	3.08916		2.24793	3.04264	2.82375	1.89142	2.04963	3.46467	2.31615	2.7761	5.43396	2.38957	3.04963	2.58015	HSF2	TRUE	0.262417
3.0993	3.32048	3.40599	2.73552	2.25096	3.52732	3.40327	3.10936	4.26153	3.16832	2.63691	3.10601	2.05311	2.98368	3.75489	3.40054	2.01792	3.01257	3.13914	2.99639	2.67807	2.82579	3.40735	3.5435	2.90304	3.48156	2.96162	3.46989	3.36317	PHF20	TRUE	0.156552
	2.30159	2.18587	1.43829	1.15704	2.88166	3.75275			3.34483		0.555816	9.85192	6.36089		1.848		1.65992	5.59186	3.41414		0.757023	3.19849	5.0387	2.20789	5.47476			4.15947	HSD17B6	TRUE	0.671479
3.20945	3.52482	1.05658	3.53481	5.46238	2.5509	0.704872	2.65076	4.49057	4.64097	1.04264	2.25701	5.16792	3.59335	5.21062	2.77821	1.91456	4.81455	3.08406	2.49313	2.91073	5.31976	2.14078	4.93546	3.61353	3.02857	2.23879	2.78031	3.95699	NR1H3	TRUE	0.405772
2.64386	6.05983		2.37295	3.68032	1.11103	3.50843	4.29793	4.49633	3.55213	2.14731		3.15543	4.8125	4.5292			3.93734	1.61824	1.36177	4.77716	3.41278	0.250962	4.53107	2.17632	0.62293	1.1177	3.82782	3.75489	TYMP	FALSE	0.483616
3.35755	3.97911	4.13011	3.61353	3.91169	4.03474	3.49442	3.65076	3.32481	3.69377	4.17393	2.38405	2.71809	3.76022	4.0781	4.33985	3.51728	3.85	3.67469	2.98368	4.03562	3.78241	3.48543	3.92125	3.76022	4.23879	2.83592	3.61353	3.6893	NCAPH2	FALSE	0.12643
4.31759	3.10769	3.00899	4.33271	3.24184	3.79597	3.19377	5.7021	3.0036	3.28983	2.91648	4.24565	3.23573	3.58736	2.73335	4.36877	3.10769	4.42559	3.48156	3.33342	2.89918	2.7845	3.46989	2.86987	3.26454	6.72096	3.7666	4.05137	3.59096	TOMM34	TRUE	0.242483
5.16471	4.2854	4.18666	3.13258	3.39094	4.44162	3.8953	4.14893	4.05832	3.65421	2.76977	3.73118	4.33842	3.88557	3.24031	4.61941	4.75596	3.55582	4.53854	3.57046	5.45055	3.77716	3.87676	3.34483	4.24413	5.05615	5.72955	3.10434	3.46858	SEC63	FALSE	0.178621
3.31325	3.18428	3.07895	3.38128	2.8339	3.45943	3.67469	3.43296	3.45418	3.0321	3.54473	3.89918	2.75489	2.75702	3.3799	2.95233	2.95233	3.49442	3.07039	3.69042	2.9982	2.81147	4.02591	3.35755	3.46728	3.77821	3.74201	3.58616	3.15381	KPNA6	TRUE	0.106081
8.11842	9.22103	5.76871	8.52943	7.46312	10.3784	8.74604	8.20438	11.1607	10.0933	8.37173	7.62936	5.89191	9.74876	9.17243	11.4108	7.75535	9.87267	7.84153	8.78986	7.28983	7.38319	9.62192	9.57505	7.6414	7.90418	10.1297	9.10868	9.74878	VIM	TRUE	0.158039
4.76765	4.80478	1.10434	3.95233	3.03562	3.34625	3.8125	4.49442	4.14975	3.95233	1.23879	1.73552	3.46989	4.29352	4.35755	3.90881		3.36877	3.03914	4.97728	0.83996	3.15866	3.67807	3.59096	2.44095	2.64847	3.33342	3.96809	3.87676	FAS	TRUE	0.322659
4.96347	5.68257	4.0036	6.17552	5.37086	6.13525	3.97361	7.10748	6.0054	6.21471	2.9279	3.9279	4.95373	5.09085	6.56484	4.65764	5.94743	5.22188	5.96786	5.75782	6.3844	5.70016	4.67016	7.21199	5.46891	3.88069	5.38267	6.11478	5.43396	RNASET2	TRUE	0.185834
5.44062	7.84555	5.14975	5.99367	5.20242	6.92873	7.13802	6.08831	7.45869	6.71507	3.34199	4.29646	2.46728	7.14812	6.80697	3.854	5.8382	6.01547	5.27314	5.49153	8.5214	4.85499	7.39335	6.17712	5.92315	1.83188	6.07575	7.52888	6.6222	CD44	TRUE	0.268208
1.1375					3.38681				0.137504					0.485427			1.90689	1.29866				0.799087			1.49057				KCNG1	TRUE	0.754082
0.536053	0.238787	3.50335			1.87578	0.722466	1.87971	2.54597	1.74846		0.831877		1.09085		2.58496		2.23879	0.555816	0.773996			2.24489	0.863938					1.94486	AGPAT4	TRUE	0.595667
2.97269	5.25361		4.22419	4.63807		1.30451		0.0840643	3.28096				2.48543	5.12309	1.32193		1.12433	0.695994	4.48091	1.96347	4.82426	1.67356	4.98504	3.87086			5.86196	4.69321	SLAMF7	TRUE	0.548228
4.38059	4.48993	3.0321	3.75702	4.14812	3.55827	2.69377	3.58736	3.74524	4.64962	2.16672	2.91265	3.24489	4.33485	5.51602	4.72083	1.39506	3.62293	3.24641	3.90785	3.2854	4	4.26679	5.67694	4.11353	1.81558	2.20163	4.78188	3.64962	BTN3A1	TRUE	0.275132
2.62761	2.38405	1.40054	4.13175	3.01792	2.9855	3.31759	4.48607	1.51096	2.64616	4.07039	4.58015	2.96347	2.59932	2.10434	2.08746	2.20477	1.91073	3.54844	3.30159	2.47249	2.53854	2.64847	1.85599	2.45943	3.23879	3.43296	2.7866	2.7845	MIPEP	TRUE	0.286219
2.53356	4.31252	0.678072	3.49953	3.01257	3.53481	4.40871	3.4957	4.26454	4.82426	3.30012	3.33056	2.56803	4.96486	5.86518	1.60407		4.85549	4.0268	2.80116	4.72247	3.52231	4.21568	4.80116	2.79077	2.52356	4.78031	4.88313	4.28614	PRKCH	TRUE	0.308363
5.50367	6.63488	4.93546	5.9644	6.13525	5.62556	5.72137	5.34696	7.19288	5.68089	5.89263	5.03034	5.31252	6.52623	6.42828	4.91648	4.6241	6.06523	5.30268	5.8495	5.06738	6.13504	5.90857	6.55321	5.21645	5.11061	5.37295	6.8125	6.0376	IFNGR1	TRUE	0.110683
4.02591	2.54102	2.50843	2.23879	3.32193	3.28244	2.32769	3	2.35896	2.90304	3.5435	1.81558	2.72465	2.82375	2.93546	3.47638	4.18507	3.22342	3.46467	1.46989	3.90014	2.95606	2.78031	3.10098	3.24793	3.4019	2.42761	1.40599	3.1177	B4GALT7	TRUE	0.233371
	3.20006		0.214125	0.83996				0.910733	0.367371				1.01436	2.17632							0.713696		1.94486				1.60407	0.15056	SH2D2A	TRUE	0.790964
3.32048	4.01078		3.24336	2.83996	3.6893	3.98732	3.83086	2.62761	2.84398	3.14078	2.76129	2.60644	3.39232	3.62644	2.50335	2.96347	3.21101	3.30012	3.61235	3.17473	2.41684	3.36036	3.38128	3.06867	3.47768	3.61471	4.21801	3.34908	VRK2	TRUE	0.142475
2.55336	5.69293	1.60407	2.8679	3.08066	3.7126	1.3505	1.37851	5.73037	3.42358	1.17632	0.799087	1.75275	4.96209	4.39712	2.85599	1.79077	4.69377	1.01436	2.92979		4.25475	2.96532	5.27128	3.04614			3.9241	4.36527	TNFRSF1B	TRUE	0.47564
4.48349	4.27575	4.40122	4.53107	3.41819	4.45812	4.4522	4.05224	4.23802	4.38128	4.37921	4.13258	3.81455	4.65935	3.8166	4.18031	3.39643	4.72846	4.1334	4.34767	3.03386	3.66562	4.62936	3.50335	3.98914	3.7148	5.17513	4.76871	4.41616	VEZT	FALSE	0.114696
0.356144	4.48349		0.584963	0.516015					1.22033				0.238787	4.69822			0.695994		0.765535				4.09592	0.275007	1.44361		4.74524	2.07382	POU2F2	TRUE	0.963862
2.94111	3.44758	3.80632	2.90497	2.49825	3.57652	3.1635	3.08746	2.46467	2.98185	3.02148	2.28688	1.23879	3.3505	3.29719	3.66903	1.53605	2.96717	2.85997	2.42492	3.06178	2.84398	3.10098	3.18903	2.98914	4.19219	2.82171	3.40327	3.53356	BRD9	TRUE	0.204957
5.67327	5.824	5.33664	5.40293	5.39438	5.97865	5.63575	5.30961	5.64933	5.41583	5.35226	5.69125	5.72846	5.90641	5.69404	5.38336	4.54659	5.61088	5.56742	5.39849	5.54009	5.46891	5.74766	5.46858	5.26604	5.22188	6.2426	5.87455	5.66676	SNX1	TRUE	0.0548674
3.35473	3.60051	3.19692	3.09085	3.50335	3.66107	2.61353	3.46205	2.5509	3.04089	2.33342	2.29278	1.58976	2.76553	3.74416	2.96901		3.03562	2.96347	3.25701	1.9222	3.07895	2.68482	2.94111	3.25701	5.76261	3.78241	3.50589	3.67582	TBPL1	TRUE	0.239906
	2.62527			0.124328		4.61471								1.42223			1.45943							3.24031	0.275007		3.9364	2.11103	ARNTL2	TRUE	0.705412
4.45615	4.86542	4.77452	4.50526	4.19535	4.99095	4.45878	4.78816	4.43829	4.0197	3.48929	4.51286	3.76341	4.29572	4.98368	4.85947	3.31325	4.24031	4.78555	4.82883	4.2891	4.29352	4.86839	4.75061	4.72792	4.7939	4.83188	4.70764	4.08236	BCLAF1	TRUE	0.0965534
4.09339	3.67807	4.6153	4.56499	4.44626	4.26003	4.02414	4.21878	3.48929	4.23955	2.71589	5.09719	4.99186	3.90977	3.62761	3.81455	3.73227	4.12433	4.33628	4.43296	5.12681	4.33128	3.87971	3.84699	4.61824	3.13586	4.73985	4.00809	3.64155	SLC39A9	FALSE	0.134134
		0.0426443								6.00787				0.0565835									0.367371	3.09255			0.948601		ANK1	TRUE	1.3567
3.43429	2.37016	2.02148	3.14405	2.81558	2.67807	2.40871	2.81762	0.879706	2.26303	3.68145	2.40871	3.19377	2.12102	2.85	2.59455	1.89918	1.8953	1.95233	3.14731	2.11437	2.29866	2.59216	2.40327	2.77821	3.0635	3.05137	3.27053	2.31034	TFB1M	TRUE	0.226447
4.39232	4.20085	5.01837	3.44095	3.27501	4.33557	3.99005	3.75916	4.27202	3.77716	4.22033	4.25323	3.96625	3.67582	4.47184	3.70044	3.07895	4.1235	4.60822	4.13668	3.88362	3.71918	4.3147	4.12928	4.33342	4.2854	4.58556	4.92458	4.09424	RABEP1	TRUE	0.107557
2.74416	3.32048	4.05398	4.97269	3.78869	3.50843	2.91648	3.96625	2.56071	2.42223	2.05311	2.88166	4.62819	3.0197	0.555816	0.0426443	1.77821	6.48864	2.82579	3.34199		3.49313	3.23266	2.36737	2.852	4.06867	2.35896	4.15543	2.41414	HMGB3	TRUE	0.408353
2.94486	3.83188	3.2032	3.57046	3.0993	3.81044	3.13258	3.81147	3.23266	2.97636	2.47508	3.6565	3.13914	3.26303	3.99729	3.69488	2.58976	3.58376	3.08406	3.43029	2.72901	3.00899	3.6427	3.51349	3.10266	3.59694	3.39094	3.904	3.0993	NUP160	FALSE	0.11922
3.01436	3.59096	1.73118	4.43763	4.63169	2.16027	2.94298	1.74416	2.51349	2.87381	2.488	1.80323	1.09761	3.05832	2.79701	1.30451	1.86394	2.60644	1.94486	3.43563	0.678072	4.20085	2.48285	3.08576	2.58015	2.29278	1.42223	3.54102	3.11603	BAK1	TRUE	0.371709
			0.263034																					0.344828	0.641546				MUSK	TRUE	0.478225
	0.333424				0.163499	3.90977	1.68257		0.464668					2.82579				0.298658					1.28688	2.42761		1.50589	2.82579	0.0565835	IKZF2	TRUE	0.863381
5.93121	6.33002	4.45022	5.90087	6.32715	6.06652	7.3881	5.10936	7.16199	7.25503	5.92955	4.81762	5.67158	7.95768	6.63981	5.478	5.6311	7.28965	6.17871	5.41988	6.39335	6.20633	5.61088	7.31723	6.3837	5.35403	5.77215	5.62	7.31207	GRN	FALSE	0.137722
4.39369	3.83693	3.33485	2.97636	2.76341	4.60466	4.13504	3.2854	3.42089	3.27947	3.05311	3.79805	2.0635	3.39369	3.97453	4.31252	2.09424	3.46074	3.8339	3.82782	2.74201	2.82171	4.53792	3.76341	3.26303	4.99413	3.05485	4.13093	4.04876	FAM13B	TRUE	0.200074
1.03562	3.05485	3.82782	3.29866	1.05658	3.06523	2.70266	0.0703893	4.60703	3.32048	3.0268	3.09424	2.60644	4.21179	3.37434	2.67807		3.58736	0.773996	2.58976		2.13422	3.88069	3.12763	0.731183	0.275007	3.69042	3.04963	3.14078	ARHGAP31	TRUE	0.457672
1.77821	2.24489	2.57773	1.83592	0.970854	1.9855	1.95606	2.09085	1.54102	1.28688	2.01436	1.05658	1.48543	1.8679	1.92979	2.10769		2.51349	1.38957	1.97085	0.641546	0.739848	1.76129	1.43829	1.46467	2.77821	1.33342	2.76341	1.94111	CENPQ	FALSE	0.313624
6.00473	5.49921	5.67299	6.34145	5.74766	5.54874	5.92006	5.99027	5.49474	5.85699	5.89433	6.01681	6.17393	5.86468	5.44328	5.96394	6.31089	5.8902	5.48382	5.94345	6.14853	5.67129	6.12639	5.38716	5.66078	5.25776	7.8351	6.00899	5.91552	SARS	FALSE	0.0787368
4.57652	4.15866	4.37504	3.28096	3.9782	4.62352	3.9279	4.0781	2.96901	4.29866	4.01346	2.79701	2.82171	4.19219	4.06867	4.55029	3.96532	4.07639	4.44162	3.41278	4.03738	3.80529	4.26078	4.26303	4.41007	4.77926	3.62059	3.65764	4.59096	RANBP3	TRUE	0.132398
2.83188	3.1375	3.99277	2.1375	2.49057	2.70487	2.26903	1.852	2.14731	2.68257	2.22651	2.73335	2.92979	2.96532	3.45286	3.14731	1.79077	2.54102	2.43829	2.9279	1.99277	2.91648	3.02326	3.35755	2.81147	3.02326	2.70487	2.75916	2.61117	ARID4A	TRUE	0.181128
3.55949	3.55582	4.24869	3.60288	3.42492	3.63923	3.42895	3.97728	2.24184	2.74416	3.34199	3.06178	3.04089	2.98003	3.97728	2.44095	2.57046	2.70929	3.07553	3.33199	2.91456	3.2555	2.6017	3.06695	3.38128	3.40735	3.9542	3.97361	3.57289	TSSC1	FALSE	0.154342
3.7666	4.23419	3.78973	2.67356	4.14405	3.14241	3.23266	2.68706	2.40327	3.29425	2.14405	2.20477	1.25096	4.61294	3.53107	3.27352	2.0036	3.43429	3.11437	1.81558	3.03386	4.1375	2.53854	4.34979	3.06695	3.85499	2.53605	1.28096	3.69265	PNPLA6	TRUE	0.28991
2.07382	1.64155	2.50843	2.19849	2.09424	2.76341	1.25701	4.52857	1.60881	2.19849	1.45418	3.98459	2.78241	2.01792	1.90689	2.82579		1.04963	2.15381	2.33342	0.669027	2.53854	2.70708	2.06695	1.95977	5.31868	3.80219	1.774	1.75702	IFT88	TRUE	0.433157
3.46336	3.13914	2.10098	3.83794	3.1635	3.0197	2.39506	3.34625	2.26903	3.29866	1.51096	2.91073	3.17313	2.88557	3.13422	2.34767	3.56682	2.77821	2.6017	3.04614	3.31179	2.73552	3.25852	2.29572	3.29572	2.68032	2.91839	3.14078	3.19849	ALG1	TRUE	0.170285
2.15381	3.15866	1.94486	2.81558	2.9542	2.67582	2.69599	3.04614	2.61824	2.61824	1.8679	2.87381	2.63459	2.99639	3.20945	3.08746	2.44361	2.60407	2.47249	2.9222	2.64386	2.7866	3.0268	2.90497	3.55827	2.95977	3.18428	3.03914	2.96532	ZCCHC8	FALSE	0.132955
3.7137	4.22497	4.13914	3.76871	3.03914	3.8953	3.96255	4.09424	4.48285	3.37295	3.90014	4.12267	2.9542	3.54967	3.9364	3.03914	2.88947	3.48671	3.17632	3.76235	3.14405	2.83794	4.10182	3.65535	2.93357	3.79286	3.91839	4.393	3.61941	ABCF2	TRUE	0.131346
4.03562	3.851	2.19219	2.29278	3.13422	3.30451	2.64386	2.39506	3.21723	3.99548	3.22959	1.60407	2.26903	3.35614	3.68706	3.07553	3.51602	3.81967	3.59216	2.39506	4.05832	3.22033	3.01436	3.68706	3.99186	2.73552	2.5509	2.5008	3.80735	CHPF2	TRUE	0.213228
		0.748461																											LRRC7	TRUE
3.46858	3.74093	4.45154	3.73444	4.3799	4.00988	3.48285	4.9472	3.56925	4.1914	1.93734	3.52356		2.40599	4.12184	3.29572	1.7137	4.69877	2.96162	3.81762	5.90809	4.45615	4.14078	3.64616	5.51033	4.26604	2.93357	4.69988	4.76075	FUT8	FALSE	0.246183
2.60644	3.33628	3.21878	2.49057	2.82375	2.71149	3.78973	2.3978	2.24184	2.06005	1.19535	2.75061	2.84398	2.76129	3.36737	2.33914		2.72247	2.97636	3.08406	1.49057	2.69599	2.06005	2.76765	2.85599	3.79286	2.57531	3.52105	2.87774	UBA6	TRUE	0.21784
2.77189	3.16027	4.35685	3.46728	3.7301	3.62761	2.37573	3.89918	4.09592	2.95047	3.17153	1.94111	1.05658	3.61117	2.34767	3.6893	2	3.61706	1.81147	3.36737	0.956057	3.0321	4.20789	3.14405	2.81147	2.08746	3.926	2.01792	2.64847	GAB2	TRUE	0.306215
4.71699	3.59694	5.90977	4.21723	4.56499	3.6427	3.72901	2.99095	4.14241	4.01346	2.64386	5.28059	3.5509	4.09508	3.44361	3.77716	2.89142	3.62761	3.48543	3.97911	3.40463	4.46009	4.19219	3.74953	3.68818	3.97085	4.43496	3.36457	3.47768	ATP6V0A1	TRUE	0.174398
3.91648	4.20006	3.92125	3.6893	3.82782	4.12928	4.49313	4.15299	3.71149	4.26228	2.81967	3.76022	2.89918	3.63227	4.65592	4.02326	2.9855	3.86096	3.86987	3.72901	3.01614	3.69265	4.48091	3.76871	3.99186	4.02326	4.38612	4.61648	4.22188	PIAS1	TRUE	0.124332
2.18903	3.15218	1.20163	2.02148	5.63169	1.26903	2.79909	1.20163	3.46728	3.30889		3.13586		2.1635	3.46597	2.15704		2.08746	2.97453	2.83996	1.76553	3.88557	2.59216	2.35896	0.887525	2.73552	2.58015	3.11103	2.91839	SLC4A7	TRUE	0.379666
	0.0426443	4.65249			0.238787	2.31325								1.86394									1.32193		2.26003				APBA2	TRUE	0.853428
3.91648	4.79909	1.59932	4.43896	5.10266	3.48285	4.47962	4.8212	5.9905	4.83086	5.00854	4.02857	4.48027	4.63807	4.35544	3.04439	4.31252	4.22497	3.96993	3.79597	4.24108	4.84348	3.61941	4.51665	4.68706	2.09761	3.09424	4.62234	4.95093	MAP2K3	TRUE	0.213917
					3.18587		7.21762						1.72683		3.33056			0.163499				0.903038			3.58135				EFCAB1	TRUE	0.806684
8.79925	10.4639	8.13638	11.267	9.68099	10.3176	9.64677	9.16365	10.7899	10.5097	9.42417	8.04073	8.09682	10.7791	10.866	10.8621	8.64965	10.4221	8.37326	10.6962	8.78908	9.91876	9.72535	10.4341	9.4088	9.34478	7.69725	10.8632	10.4397	TMSB10	FALSE	0.106592
0.863938	1.89918	1.48027	2.38957	2.01792	1.9222	1.4957	2.11437	0.807355	1.79909	0.773996	1.22651	1.94486	2.06005	2.30743	2.07382		1.5008	1.24489	1.68706	1.25701	2.10769	2.16027	1.47508	2.24489	2.42761	1.53605	2.41414	1.99277	ASTE1	FALSE	0.277792
3.76765	4.79233	4.9331	4.13175	4.24945	4.58796	4.19456	3.7866	4.33128	4.55766	4.02768	4.38336	3.9782	4.38474	5.38922	4.16752	3.64616	4.28392	3.67694	4.55704	2.97085	4.42761	4.56133	4.70653	3.85997	5.41041	3.97545	5.06221	4.79597	RNF19A	TRUE	0.12348
5.38336	3.33914	3.39506	3.22497	2.63691	3.66676	3.87873	3.90207	3.07382	3.25096	3.83188	4.42694	4.72901	3.55336	3.06695	3.3147	1.9782	3.47638	3.8953	3.0197	3.10936	2.95977	3.29572	3.02326	3.40599	3.78031	3.8846	3.774	3.24031	PEX3	FALSE	0.182917
6.91325	5.79805	7.26725	6.15137	5.46009	6.1373	5.87209	6.46041	6.08002	6.18844	7.92884	6.60777	5.89336	6.23726	5.79129	6.10329	5.30561	6.41041	6.43613	6.19436	5.9472	5.64472	6.26322	6.14017	5.95582	6.23228	6.33324	6.15603	6.04592	GABARAPL2	TRUE	0.0826386
0.250962			2.55827	1.26903	0.895303	3.05485		2.14078	1.41143	2.13422			1.62293					2.07724	3.18903	2.83188	1.79494	2.57046		5.749	0.0976108			0.831877	MYOC	TRUE	0.655358
4.34341	2.87774	3.82985	5.15866	3.97728	5.26903	4.04264	5.93593	3.02503	4.88655	1.9486	6.71987	2.53356	4.53854	4.17073	4.20163	6.49825	4.06695	5.53387	5.26078	6.63023	5.41109	3.80012	3.0635	5.51381	3.43162	5.49057	4.10936	3.91648	SH3YL1	FALSE	0.272474
3.51096	3.93074	3.23879	4.8125	4.63401	3.65535	3.85499	3.94579	2.67129	3.16189	3.8268	4.07296	4.43829	3.28392	2.99639	3.01257	3.84699	3.65535	3.82273	4.44559	4.92077	4.45681	3.60881	3.01614	3.83693	3.17792	4.63459	4.25096	3.75275	FAM136A	FALSE	0.156441
3.99458	5.14364	2.75489	5.53232	4.98231	7.23831	6.76035	4.57168	6.21801	5.73931	6.95222	5.32553	3.02326	5.4489	3.95884	5.24717	4.29131	6.34501	6.19535	6.97097	4.66391	4.35544	7.33128	5.3844	4.77241	5.70404	5.54473	4.20163	6.65033	VCL	TRUE	0.223553
	1.7866		2.40327	2.31325	0.367371	0.815575			4.15462		0.722466			1.11103			2.59932		1.89142		2.26303			0.485427	2.96532	1.60407	3.06178		DEPDC1B	TRUE	0.566118
	0.31034	1.94111	3.51349	4.16027	0.321928		0.475085	2.98185	0.378512	2.96162	0.189034	0.613532	4.34199	0.0426443				1.48543	2.3505		4.78712		2.75916	3.5509	0.422233	5.46401		0.226509	DAPK2	TRUE	0.859078
3.15056	3.96532	2.97636	3.60288	2.76129	3.41143	3.61589	2.89336	3.43162	3.07039	3.01078	2.87381	1.98914	3.32912	3.95233	3.07211	2.95606	3.22033	3.24336	3.7301	2.59932	3.0993	3.74739	3.69153	3.22033	2.58256	3.86096	4.15218	3.6017	NSMAF	TRUE	0.148327
3.71149	4.30378	3.78136	4.46597	4.24565	4.19849	4.72356	4.25096	3.89724	3.71149	1.96347	4.63169	3.43429	4.23955	4.13011	3.78973	3.27053	4.18269	3.91265	4.32193	3.70819	4.17712	4.0321	3.90689	4.12928	5.58376	5.08704	4.57713	4.12846	ADSS	FALSE	0.152344
	4.30451		0.918386								3.75061			4.52042					1.66903				3.774				5.51885	0.163499	STAP1	TRUE	0.621698
7.4441	5.89191	6.82413	6.4363	5.84649	8.47484	7.55704	5.26454	7.81845	8.59805	6.57592	6.09782	4.94486	7.34731	5.9279	9.93578	5.56986	7.9472	7.35861	6.78999	4.96809	5.99095	8.58733	7.19771	6.23974	7.34687	4.56864	4.37156	8.40548	TIMP2	TRUE	0.200738
4.04614	4.06178	4.07895	3.61941	3.49313	3.9486	3.47897	3.71699	2.76553	3.42761	2.79909	4.45154	3.85997	3.78869	3.93074	4.22805	3.49825	3.38128	3.62877	3.71149	3.67694	3.61941	4.19535	3.66448	3.61941	3.67129	4.41549	4.63052	3.48671	RFC1	FALSE	0.112403
4.17871	3.59096	3.32481	3.3978	3.73335	3.67469	3.81558	3.0072	3.44228	3.31615	3.21412	3.79805	3.78973	3.47768	3.36457	3.53978	3.40599	3.88655	2.87381	3.58256	3.60763	3.76553	3.39369	3.08236	3.64731	4.09677	3.74093	3.60999	3.55582	TBC1D23	FALSE	0.0834668
4.91217	5.25475	5.07339	5.14405	4.97131	5.10978	5.77452	5.03738	4.77716	4.72028	5.13052	5.64328	4.84649	4.84197	4.99503	4.59813	4.22419	5.0781	4.82528	5.30779	4.849	4.86344	5.12474	4.70543	5.01167	7.0129	5.44526	6.15462	4.97361	CUL3	TRUE	0.101421
										8.47399	1.96347												2.01792						MYOM2	TRUE	0.901593
			2.76341	6.66534								8.09787	0.111031						0.238787		6.36807			2.18269					OTC	TRUE	0.86003
		3.7939																											CYP46A1	FALSE
3.45418	3.19535	2.75061	2.8679	2.75061	3.36737	3.10098	3.47897	2.22959	2.77189	2.4957	3.76129	3.1375	2.65306	3.17632	3.51475	2.32481	2.71149	2.87184	2.85	2.57289	2.49825	3.58976	2.25096	3.12102	2.62293	4.20555	3.12598	2.92029	ZZZ3	FALSE	0.158192
4.54288																			0.485427										SLC18A1	TRUE	1.14116
2.91456		3.87774	3.64962	3.47379		2.07724	3.43029	2.06005		4.72574	5.79155	3.18428				2.90881			1.7137		3.41954	0.956057			5.41515			0.344828	USP2	TRUE	0.473829
									2.43296		4.89385					2.64616								3.32193					CASR	TRUE	0.334934
3.67807	1.73985	5.01926	1.89918	2.1177	3.30305	3.40463	2.59216	2.64386	3.48285	3.8268	3.30305	1.42223	3.26303	2.18587	3.849	4.58135	2.93734	3.72792	2.48285	2.99095	1.85599	3.65076	3.15218	2.71809	3.31325	2.79286	1.4489	3.66676	TUBG2	TRUE	0.293571
3.21257	3.46336	3.14241	2.87184	2.98003	3.17313	2.69599	3.488	1.774	2.852	3.64039	2.51096	2.14731	3.21878	2.21101	2.36457	2.75275	2.80323	2.42223	2.73769	2.12763	2.96532	2.16993	2.28688	2.29278	4.65421	3.37573	3.09424	2.75916	RPL26L1	TRUE	0.208124
1.45943	1.58976			0.422233	1.62293	0.422233	1.8953	2.09085	2.01436	2.0036	0.432959	1.43829	3.29572	2.09085	0.83996		3.01436	0.516015			0.650765	1.69599	3.26153		1.21412	2.1635		1.35614	FLT4	TRUE	0.539515
3.89627	4.65821	3.51096	4.35403	3.99729	3.94486	4.21023	4.0045	4.4019	3.47768	3.90014	3.83592	4.17871	4.1177	4.21878	3.59455	3.20945	3.6241	3.75382	4.13668	3.36457	3.94673	4.04002	3.97636	3.848	4.31976	3.78346	4.77083	3.87676	NSUN2	TRUE	0.0902469
2.76977	2.63227	2.65076	2.97453	2.0072	3.55459	3.56071	3.27352	3.15866	3.57289	3.26303	2.64616	2.24184	2.97269	3.25399	3.30305	3.35332	2.79701	3.67016	3.04264	3.01614	2.45418	4.10936	3.23113	2.80941	3.02857	3.52356	3.23419	3.21412	FBXO42	TRUE	0.146473
3.26903	3.848	3.39369	3.67129	3.29572	4.01436	3.86394	3.55827	4.0798	3.34767	2.90304	4.22882	3.38957	3.15056	3.2032	3.23266	2.05658	4.10769	2.61117	3.22805	2.70487	3.07553	3.65306	3.14078	3.14568	2.40327	3.91839	3.72247	3.9514	MFAP3	TRUE	0.156451
1.99277	3.14731	2.33628	2.80735	2.94673	3.42089	3.14731	2.80116	2.30451	3.35191	2.58976	3.0268	3.03562	2.08406	3.78973	3.36177	3.16511	4.08661	3.76871	3.07895	3.74093	3.47119	3.31179	3.76341	4.20789	1.0072	2.99277	3.12928	3.16832	MRI1	TRUE	0.219488
4.16108	3.33914	2.04264	3.6017	0.367371	3.9542	2.58976	3.72356	3.57046	0.555816	2.12433	3.71918		3.07724	1.65992	2.75061	3.16993	2.52105	3.43696	3.02148	3.50589	1.65535	3.17792	1.65535	2.31615	3.1375	3.15218	3.33628	2.58976	METTL1	FALSE	0.342637
1.94486											1.07039			0.31034	1.42761		0.298658												HOXC8	TRUE	0.708117
3.12598	2.08746	3.15866	3.21101	2.5435	3.0054	3.93168	3.05832	2.06695	3.3147	2.30159	3.77716	3.83289	2.82985	2.46205	2.75916	3.18587	3.18269	3.22805	2.68706	3.0635	3.22033	2.854	2.92979	3.27798	3.90111	2.96532	3.88557	2.7761	AGA	TRUE	0.164315
2.71589	3.23879	1.36737	3.91265	4.86888	3.09255	3.42223	2.76553	2.01792	2.42492	0.992768	3.06005	5.11061	3.6792	3.11936	1.58496	2.29866	2.76765	3.35614	3.5435	3.94205	4.76765	2.40599	3.15218	4.22574	3.12433	3.85499	3.7301	3.06695	PI4K2B	TRUE	0.311092
3.04789	3.88166	3.41278	3.04089	3.11103	3.47119	3.08236	3.22342	3.41007	3.37295	2.40599	3.30159	1.21412	2.848	4.09845	3.89821	1.65992	3.58015	3.13093	3.43429	2.86987	3.02326	3.55949	4.04527	3.20477	4.0917	3.42895	3.851	2.60407	BOD1L1	TRUE	0.202701
5.48993	5.89312	4.76341	5.91982	6.13155	5.28021	5.02281	6.06242	4.45286	5.15906	5.48027	6.21257	5.30998	5.54288	6.15765	5.81429	3.36737	5.28429	4.97269	5.78607	5.41007	6.20535	5.63662	6.04571	5.46597	5.22033	5.93168	6.21684	5.44493	MAT2B	FALSE	0.112336
	0.124328		0.0976108		1.43296				1.21412		0.250962		0.400538	0.970854			1.8953		0.124328		0.389567							1.04264	TLL1	TRUE	0.856922
3.05658	1.22651	2.40327	2.73335	2.92029	2.92029	2.98732	2.01792	1.79494	2.55827	2.41954	1.73552	0.584963	1.41143	3.1811	3.46728	1.76129	2.53605	2.61353	2.19849	2.8953	3.08746	2.37573	2.25701	2.24793	2.96162	1.94486	2.78241	2.45943	EDC4	FALSE	0.270179
3.36737	3.61706	4.86096	4.1811	2	3.90014	3.68257	2.88753	4.99548	3.95791	3.21412	3.20477		3.89239	3.20163	4.29572		3.9364	3.39232	4.18982		2.30451	4.44493	4.1152	1.88753	4.12433	3.10098	3.2032	3.71149	TRIO	TRUE	0.215317
3.49953	6.35562	4.89336	2.69377	1.28096	4.99186	2.53605		5.77215	3.76129	2.96347	2.30451		3.10266	0.0840643			5.49249	1.58496	3.03386	1.43296	1.63691	3.01257	2.67356	1.99639	2.68032			4.28466	VCAN	TRUE	0.502659
2.57289	2.28688	3.58616	2.27798	2.1375	2.39232	2.36177	2.75702	2.33914	1.99639	1.93734	2.56071		2.9486	2.89724	2.14405		2.59932	2.07039	1.69153	2.01078	2.69599	2.33914	2.61353	2.22342	3.95606	2.87381	2.77189	1.94486	CLEC16A	FALSE	0.201016
4.30305	3.44758		2.35614	1.32193	1.09761	2.99277	1.84398	5.74066	3.98823		2.06695	3.24031	6.5509		2.47768		3.99005		0.799087		2.71149	2.79494	2.40327	2.08066	2.48027	0.765535		3.8846	MSR1	TRUE	0.509906
	2.67807	0.0143553	6.92315	6.68257	3.85599	5.65335	6.02481		4.9528		5.56986	6.2485	4.75489	2.20789	0.464668	5.47281	5.83946	6.4822	6.55612	5.26228	6.73091	3.64386	2.97636	6.63023		6.45434	4.62469	3.7761	CDH1	TRUE	0.40186
4.30597	4.2426	4.33128	4.39094	4.52857	4.51475	4.27873	4.42156	3.91648	4.07724	4.19456	4.59455	4.0365	3.91456	4.44228	4.11936	3.38681	4.16672	4.62176	4.43296	3.80839	4.85848	4.49249	4.0036	4.29278	5.01525	4.5656	4.57531	4.04352	SKIV2L2	FALSE	0.0770359
							2.15381											0.344828								1.15704			DNAH5	TRUE	0.743547
3.11437	2.9486	3.62527	2.46205	1.94111	3.83592	2.66903	2.852	3.20633	2.95233	2.39506	3.52231	2.89724	3.04439	2.87774	3.43563		3.49057	2.40871	2.26303	1.72247	2.32193	3.25248	2.62761	2.53605	3.81558	3.42358	1.80323	2.9222	ZFYVE16	TRUE	0.201182
3.60526	3.58256	3.76129	1.61353	2.33914	3.65076	3.39232	2.70044	4.33128	4.17712	4.13422	4.16027	1.91073	4.57894	4.22188	4.08576	3.66789	4.73173	4.17153	2.8679	3.04614	2.69822	4.23036	5.11894	2.80941	3.84699	2.90111	2.76977	4.35403	FAM65A	FALSE	0.24097
				0.124328			5.92742	4.30743	2.73985		0.963474	8.49885	0.443607		0.443607	4.99955			0.565597		0.15056			1.76977	1.46989				C6	TRUE	1.06537
3.01792	3.86592	2.19535	3.08576	2.38957	6.85112	3.90785	3.39506	2.82782	3.44361	2.87774	4.24641	4.31759	4.66619	3.97453	3.09592	2.10098	4.96993	2.90304	3.56803	2.93546	2.25399	5.04963	5.02414	2.19849	4.66278	3.17153	2.91073	4.61353	RAI14	FALSE	0.30663
																									5.4266				SOX30	TRUE
4.04002	3.78136	2.42761	3.68482	3.69711	3.10936	2.62059	3.86493	2.83794	3.7939	3.19692	2.52857	2.39232	3.4489	4.34696	2.64386	3.66676	3.1177	4.5373	3.42223	3.77926	3.75168	3.32481	4.50208	3.64962	3.15704	3.51979	3.74739	3.46858	PNKP	FALSE	0.168431
			2.63923																								1.42223		BEST2	TRUE	0.423763
1.21412	1.19535	2.19219	3.73985	3.09085	1.23266	0.411426	0.214125	2.47508	0.910733		1.63691		0.925999	1.49057	1.48543		0.879706	0.62293	3.15218		3.9514	1.852	1.23879		2.9241	2.03914	1.21412	0.31034	PHLPP2	TRUE	0.629817
1.50589	3.01792	2.8679	2.82782	1.66448	2.38957	1.40599	1.66903	0.895303	1.58976	0.748461	1.38405		1.45418	2.37851	1.95606		2.26303	1.04963	1.78241	0.799087	1.18269	2.01792	1.92979	1.87578	4.82731	1.69153	3.20163	1.60407	SPDL1	TRUE	0.45457
4.26529	3.76447	4.65134	4.06695	2.71589	4.05224	5.14608	4.08916	3.59216	3.94486	5.56986	4.68594	3.9364	3.52607	3.92315	3.48671	1.82782	3.63807	3.74416	4.36947	3.48543	3.41684	4.27873	3.28392	3.5509	3.94767	4.72465	4.23879	4.63575	STAU2	TRUE	0.182143
3.24489	1.26303	1.92979	0.887525	2.70044	1.926	1.31034	1.5656	2.28392	2.83592	2.10434	0.411426	1.33342	1.33342	2.02503	1.64155	2.56803	2.37016	2.58496	0.757023	2.06005	3.0993	1.58496	3.09761	2.17951	3.25399	1.83188	1.79909	2.37851	PQLC2	FALSE	0.370605
3.62994	2.57773	3.17632	1.77821	2.0036	2.79909	1.22033	2.16027	2.05658	2.80735	1.73118	2.78031	2.38128	2.9782	2.29572	2.61117	3.02503	2.926	2.57531	1.90304	2.488	1.83996	2.488	2.85599	2.38957	4.13011	2.87381	2.65764	2.5509	CTNS	FALSE	0.232549
		1.86394		0.124328	0.0976108																		0.847997						RTN4R	TRUE	1.13154
4.19219	4.15785	3.94953	4.11437	4.04089	4.40122	4.44956	4.0018	4.46074	4.07296	3.0054	3.84599	3.75489	4.11187	4.1375	3.83895	2.79494	3.97453	4.10601	3.54226	3.43962	3.09085	4.34696	3.95047	3.39506	4.4019	4.2555	4.51286	4.56925	PHF23	TRUE	0.115513
		4.17393																0.748461											CDH10	TRUE	0.984144
3.00899	3.45418	3.49825	2.01078	2.51096	2.58496	3.01436	2.05311	2.80323	3.41007	2.0036	1.5656	0.9855	2.87184	4.09255	2.26903		2.36737	2.11437	2.79494	1.42223	2.76341	2.50589	3.7939	2.81762	2.65764	2.22959	2.98732	3.63227	INPP4A	TRUE	0.273364
1.15056		2.27798	2.16993	1.97085		3.35191	0.443607		1.15704				2.16993				0.344828	4.1035	0.956057	3.27947	1.79077	0.505891	0.137504	5.46565	1.59455		1.90304	1.45418	RAB27B	TRUE	0.718382
5.78555	6.63996	5.35544	6.81275	6.48864	6.56651	6.16932	6.3336	5.5735	5.62848	6.07916	6.03826	6.18388	6.32517	6.15947	5.09128	4.59335	5.91337	6.30232	6.52732	4.97499	6.39008	6.12495	5.59694	5.63517	6.15137	5.72465	7.03012	6.30979	PSMA4	TRUE	0.0924542
		0.85599																											MYO16	TRUE
3.06867	3.42492	3.57168	3.76341	3.6017	3.81044	3.45812	4.10266	3.26604	3.2555	2.95791	3.85499	3.34341	3.18903	3.65992	3.35191	2.94673	3.49057	3.38267	3.76553	3.10266	3.74953	3.71809	3.31759	3.34483	3.81558	3.39369	4.03034	3.3505	LSG1	TRUE	0.0868313
4.05398	2.48027	3.47508	2.60407	4.1643	2.45943	3.15218	3.08406	3.42626	3.45286	2.76341	2.88362	3.05658	3.44228	2.70929	2.61824		2.26303	2.59216	2.63227	2.74201	4.5601	2.72028	3.40599	4.0009	2.03914	2.96901	2.33914	3.40327	PARP3	TRUE	0.202881
1.20789	6.88692	3.65421	2.70044	3.93074	5.51159	5.19928		4.8339	3.34199	3.50335	5.27165	1.18903	3.88264	5.17113		1.35614	2.64616	4.53978	5.85449	1.64616	4.13668	5.63836	6.05094	3.12267	0.176323	5.22265	3.88753	4.33056	TNC	TRUE	0.43892
2.62994	2.16672	2.45681	0.650765	2.21412	3.01792	2.17632	2.79701	1.48543	3.14893	3.04264	1.18269	1.87971	2.69822	2.8339	3.70155	2.52105	2.42223	2.82782	1.27501	2.98003	2.27501	2.59932	2.98003	2.35332	2.70487	2.43563	2.0635	2.9542	THAP3	TRUE	0.269509
2.70708	1.33342			0.669027	3.20945	0.62293	1.12433	1.28688	2.10098	1.31034	1.89918			1.42223	1.32769		0.0285692				0.464668	1.94486	1.45943	0.495695	1.79909			2.16027	FAM65C	FALSE	0.556118
2.05311	3.11437	2.23879	3.12267	1.82782	2.22651	0.963474	3.19061	2.0036	1.97085		2.32769	1.87971	0.713696	3.58015	1.05658		2.1635	1.28096	2.33628	0.659925	2.37573	2.38957	2.67129	2.35332	3.95791	1.17632	4.2765	2.35614	TDP1	FALSE	0.41198
2.59455	1.98914	0.485427	3.02148	2.23266	1.68706	2.73552	1.58015	4.10266	2.24793	3.54226	1.15704	3.0036	2.13422	1.43829	2.26903	1.49057	0.978196	1.87578	2.24793	0.963474	2.24184	2.0321	1.65992	1.97085	0.669027	3.08406	0.948601	2.20477	AIFM2	FALSE	0.421027
2.58015	0.31034	2.03914	1.35614	0.214125	2.78869	0.9855	3.0993	1.35614	2.55582	1.36737	2.74201	1.36737	0.9855	0	3.19692	1.78241	0.678072	1.56071	1.29866	1.03562	0.124328	2.26003	1.19535	1.26303	5.20242	3.72683	0.367371	2.19535	SPATA7	FALSE	0.697523
3.02503	3.51349	3.60763	3.11603	2.99458	3.15381	3.1177	3.5435	3.38405	2.98732	3.20477	3.9982	1.65076	2.96901	3.42492	3.66789		3.40871	3.5741	3.39917	2.6017	2.848	4.04963	3.13914	3.44758	3.90497	4.0917	3.38128	3.2854	MED17	TRUE	0.147809
5.54133	3.23573	3.83188	6.06803	7.10852	3.29572	4.47379	3.39506	6.78293	4.83946	3.24489	5.68229	6.32085	4.50398	2.98732	3.69153	4.34483	3.14568	4.69933	6.18329	3.42089	6.97625	4.36597	3.1177	6.04264	4.0321	4.86394	3.73877	3.97269	RETSAT	TRUE	0.279886
3.56682	5.48446	2.65306	4.61765	4.00988	4.1819	6.28891	5.08279	4.30451	5.63198	1.62761	4.95791		7.04144	6.23783	3.20789	3.94298	5.16712	4.81044	4.60051	4.18982	4.23113	3.62761	4.26828	6.26266	3.90881	2.53107	5.98664	5.67243	CAPG	TRUE	0.27483
5.68004	5.67525	4.67469	5.64818	5.50208	5.22535	6.35191	4.60407	5.4941	5.92529	5.09085	4.82375	5.5245	5.70708	4.852	4.52293	4.84699	5.65392	5.88777	4.89821	5.16068	5.13996	4.28983	5.49313	5.03562	5.00899	4.64904	5.51033	5.49281	AP2S1	TRUE	0.0930563
												2.82782																	USH2A	TRUE
																									6.00495				ZPBP	TRUE
1.24489					2.58736				0.367371	3.34056				2.8339												11.8148	1.73118		TG	TRUE	1.12339
	3.92125	1.63227	3.15381	0.9855	2.49313		4.12846		5.28577		2.15056		0.15056	4.69153				0.565597	2.97269		0.831877	1.66903	4.12267	6.64227			4.49889	2.98732	ADAM28	TRUE	0.608664
			2.34483	3.65076		5.80168	4.8953		1.83996		1.40599					2.13422	1.36177	1.07039	2.34199	6.85187	3.50462			3.07724	2.12763		3.23726		BARX2	TRUE	0.553086
3.97728	3.45681	4.2211	3.39094	3.63923	3.79701	3.83188	3.42089	3.23266	3.07211	2.99458	4.29278	4.21956	2.88947	3.05832	3.02326	2.69153	3.44626	3.12928	3.46074	2.4957	3.34908	3.24641	3.36457	3.80839	6.488	3.58135	3.854	3.45549	DCUN1D1	TRUE	0.202391
4.05918	3.89433	3.05832	2.65764	3.39369	2.55827	2.90689	3.39506	2.12102	3.43162	2.60644	3.18903		3.52732	4.64847	4.65478	2.12102	2.50843	2.8339	2.22342	3.42223	3.75916	3.57531	4.41481	3.55459	3.13586	3.43829	3.23266	3.71918	JADE2	TRUE	0.210708
		1.04264																											ZIC2	TRUE
3.68706	6.01436	1.66448	3.74416	3.51349	2.87184	2.42492	2.28983	5.40088	3.55336	1.02857	1.14405	3.44361	4.57652	6.01547	1.48543	1.39506	4.3147	2.08746	3.10601	0.871844	4.01703	3.03034	5.91049	3.1177	1.82375	1.1177	5.13627	3.99367	LCP2	TRUE	0.490686
2.52356	2.64386	2.34483	2.45943	2.55827	3.73227	3.17153	3.96625	2.22342	2.41414	2.80735	3.04963	2.53107	2.51349	2.75275	2.73335	3.38957	3.56682	4.03474	3.36597	2.41414	2.53107	3.48285	2.83188	2.78031	3.72465	3.01436	3.0197	2.56071	TRIT1	FALSE	0.176217
		0.903038				0.176323		0.903038		2.75061			2.20789				4.66334	3.23879		2.29866									ADRB1	TRUE	0.680743
			5.09255	5.01078															3.41684		6.16832	0.214125		0.238787					GUCA2B	TRUE	0.768256
3.26903	2.66448	0.815575	2.0072	2.48285	3.43829	2.34199	3.70819	2.488	3.38405	1.49057	2.38957	1.774	2.68257	2.848	3.72356	2.93168	3.38819	3.52482	1.82782	2.75489	2.74846	3.23726	2.68257	2.97636	2.59455	3.29131	1.75702	2.76765	CUL7	TRUE	0.259932
6.51586	5.71699	6.11416	6.83441	6.6295	6.54813	7.20252	6.78359	6.43946	6.46091	7.23582	7.08491	5.69265	6.97842	4.8953	6.39318	5.39643	6.62249	6.42324	6.72588	6.14119	6.5932	6.5489	5.853	6.85512	5.25965	6.82184	5.8301	6.56346	CTNNA1	TRUE	0.0912653
2.86196	2.45943	1.89142	2.40599	2.99095	2.41143	1.8679	2.81967	2.22959	2.6017	1.76553	2.38681	3.60051	2.02857	2.68482	3.20633	2.58496	2.67582	3.20789	2.24793	2.59216	2.92029	2.46467	2.58015	2.75489	3.27501	2.26303	2.22959	1.68257	PHKA2	TRUE	0.183295
0.250962	0.226509	1.41143			2.8339	1.31034	1.28096	1.63227	1.86394		0.0285692	2.16993	1.3505	0.111031	2.70044		1.4957	0.0976108	0.604071			2.14731	0.575312		2.23266	1.32193		1.59932	CNTLN	FALSE	0.666836
	0.799087	0.0426443	1.1177	0.9855	2.35614	1.90304		2.0036	3.10098	2.11103	0.495695		1	1.46467	2.57046		3.78031	3.75275	2.86394		0.773996	3.43962		1.22651		1.94486	1.29866	4.03738	EPHA3	TRUE	0.590732
6.8732	7.78267	5.92267	6.65607	6.4192	7.21218	6.39541	7.4002	6.4949	6.00473	6.84285	6.90509	6.89724	7.28845	6.25965	6.24698	6.07575	7.21907	7.04614	6.80336	6.98857	6.87381	6.58015	6.1235	6.62892	7.08863	8.90277	7.05593	6.68229	HSPA5	TRUE	0.0881049
	2.86196		6.42139	5.9991	3.44626	2.66903	4.78607	3.49953	4.62936	4.06523	4.94298	3.13586	3.66562	0.15056	3.1635	4.4019	4.46663	4.65306	5.9222	5.53543	6.23879	3.54967		5.89627	2.31904	4.85997	1.83592	3.42761	DSG2	TRUE	0.364463
2.90304	1.95606	3.1635	2.41684	2.28688	3.80219	2.86196	3.92979	1.91073	3.67582	3.57289	2.7866	2.52105	2.96347	2.85599	3.59813	2.52105	2.51602	2.854	2.75489	3.49442	2.43829	3.26754	3.06867	3.46074	1.65535	3.17632	2.7761	3.02857	GEMIN8	FALSE	0.196788
1.74846	2.95977	1.29866	2.36457	2.83996	2.50843	2.22033	2.67807	0.641546	2.30743	0.536053	2.59694	0.85599	2.60644	3.43029	2.48543	1.774	1.98185	2.64155	2.30451	3.0268	2.25701	2.5435	3.24336	2.926	2.89142	2.86987	3.53605	2.12433	OFD1	FALSE	0.323379
2.82985	1.88362	9.08667	2.82375	1.76977	3.01078	3.32337	2.45418	0.443607	2.84599	1.02857	3.04789		3.14078	0.356144	1.11103			3.19219	3.88947	3.52857	0.333424	1.35614	3.66903	1.79494	2.39506	1.02857	0.286881	1.58496	GPM6B	TRUE	0.738868
																									4.89676				MAGEC2	TRUE
		2.80323	0.678072	0.163499	0.895303	0.895303	2.84197	2.20477	1.4489	1.28688	0.565597		1.41143		1.26903		2.32481	0.485427	1.13093		0.238787	1.15056	0.378512	0.887525	0.0840643	1.85599		1.33914	PREX2	TRUE	0.669784
2.96901	2.82375	3.38819	2.53107	2.40599	1.92979	1.65535	2.15704	2.90111	2.18587	2.9782	2.28096	0.526069	2.14731	3.24184	2.84197	2.17632	2.35332	2.26903	2.488	1.85997	2.05658	2.45418	3.43962	3.0054	3.27947	2.63227	2.66221	1.90304	WDR37	TRUE	0.247119
3.08576	3.23726	2.83592	3.01078	3.04614	2.64616	3.01792	2.52607	2.68482	2.41414	2.11437	2.96347	2.54597	2.48027	3.59932	2.13422	1.90304	2.41684	2.87971	3.12763	2.14078	2.89336	2.852	3.15056	2.95791	3.20945	2.73552	3.3147	2.79909	YTHDC2	TRUE	0.144357
2.71809	1.57531	2.72247	3.00899	3.15704	3.08236	1.43296	2.99277	1.22651	2.63227	0.536053	2.18269	2.03562	2.32481	1.45943	3.19377	1.62761	1.90304	3.34056	3.0018	0.555816	3.32048	2.99458	1.86394	2.74631	0.678072	2.09085	2.30159	2.21723	CTPS2	TRUE	0.374065
5.22381	3.90304	5.142	4.11603	3.61117	4.66959	4.84699	4.19377	3.9855	4.30889	4.68257	5.66647	3.69265	4.5472	3.83491	4.33485	3.80012	4.36177	4.82477	4.29352	3.92695	3.44361	4.39025	3.99005	3.71149	4.63575	5.74201	4.24413	4.68201	ATP6V1H	FALSE	0.133043
4.67129	5.15987	4.68426	4.88899	4.66164	5.08619	4.76182	5.02503	4.28096	4.46597	4.96532	5.05918	4.05224	4.67243	5.0917	4.58075	3.93452	4.55275	4.53481	4.88655	4.18903	4.41549	4.96947	4.69209	4.54535	5.42928	4.95559	5.36632	4.75382	POLR2B	TRUE	0.0761555
4.68201	3.83086	4	3.43029	3.74093	4.55582	4.43296	4.74201	5.16108	3.79077	3.24031	3.50335	4.93499	3.15704	4.71589	2.9982	2.9486	2.50589	3.91552	4.15218	3.51728	3.61353	4.1643	3.74739	3.68818	4.32912	4.50208	4.7137	4.09761	FAM214A	TRUE	0.165482
1.49057	3.41954	4.13011	1.73118	2.57046	0.978196	2.67807	1.65535	1.99639	1.38405		1.72247	0.9855	3.12102	3.67582	0.678072		1.12433	0.933573	1.67356	1.59455	2.95233	1.18269	2.92029	1.90689	2.79077	3.70598	3.0072	1.51096	ARAP2	TRUE	0.460898
3.68818	4.24108	3.90497	3.63691	3.45286	4.04177	3.62644	4.05311	3.76022	3.73769	3.44758	4.04002	2.88166	3.51602	4.49761	3.93357	2.91648	3.98094	3.53605	4.23266	2.95977	3.57168	4.15623	4.18507	3.89239	4.80323	4.09845	4.24641	3.56071	TPR	FALSE	0.117181
0.613532			2.83592	1.774		1.1375	3.75916	2.68482		0.545968	1.3505	10.3234	0.0703893	2.64386			1.43296	1.89918	2.43029		2.59694	0.0976108	4.05745	0.584963	0.454176		3.27798	3.38405	CP	TRUE	0.968919
2.34199	2.58015	1.98914	2.3505	2.07039	2.37573	2.65076	5.55704	2.12763	2.79494	1.79909	2.46989		2.26303	2.50335	1.54102	1.60881	1.49057	3.23266	2.76553	1.47508	2.46728	2.65764	2.21723	3.38543	2.81762	3.79077	1.85997	2.27798	KIAA0556	FALSE	0.330527
2.65306	4.01792	2.87381	4.19613	3.48671	3.60881	3.6241	3.42492	2.90881	3.90497	3.83592	4.01078	2.10098	3.51475	4.57954	2.97085	1.79909	3.79077	3.64501	4.26604	3.22805	3.4489	4.53481	3.84398	2.88947	3.05832	3.62761	4.97728	3.62644	DTNBP1	TRUE	0.198641
0.807355		0.411426	3.67243	3.22342		0.871844	2.16672			1.30451						1.68257			3.31904	0.765535	3.6241	0.948601		3.01436	0.722466			0.176323	XK	TRUE	0.710295
													0.176323				2.3505								1.9855				ANO2	TRUE	0.774072
2.57531	2.87578	2.50843	2.4957	1.73985	2.81762	2.67356	2.26903	2.67807	1.9222	2.33342	1.60407	1.04264	1.89142	2.59455	1.48027		2.76129	2.55827	2.69822	1.10434	2.0036	2.38681	2.60644	2.45943	3.14568	2.84197	2.99639	2.86987	C12orf4	FALSE	0.235537
2.9982	2.33056	1.1635	2.28392	2.43563	1.76553	1.07724	0.613532	2.51602	2.14731	1.13093	1.45943	3.88947	1.36177	1.47508	2.72465	1.67356	1.99277	1.64155	2.49057		1.52607	2.21101	1.74416	0.748461	4.848	0.933573	1.61353	1.58496	SCML1	TRUE	0.473885
3.03738	3.11603	2.40054	1.85997	1.66448	2.79286	3.41278	1.96717	2.99458	3.01792	3.70155	2.02148		4.01614	3.72683	3.77926	2.57773	4.25248	2.90881	2.52105	2.46989	1.70929	2.64847	3.26153	2.12433	2.69599	2.93923	2.89918	3.13586	WWC3	TRUE	0.24105
	0.226509	1.75275	0.0426443	0.400538	3.38267	1.70044		2.61117	1.8953		2.72683		2.24489		3.71039		1.70487	4.76977	2.44626			3.61706	2.19849		1.20163	3.80941		2.70487	ARHGAP6	TRUE	0.560121
		0.575312																											FAM184B	TRUE
5.06695	5.18507	6.69293	5.57833	4.88655	6.25588	6.2032	6.04439	6.27966	5.84474	8.59033	6.1534	4.61941	5.77926	4.97361	5.78529	4.70487	5.75649	5.41718	6.04701	4.75916	4.6011	6.09022	5.50557	5.16712	5.80503	5.6476	5.12639	6.14466	MAP4	FALSE	0.140867
3.61117	3.854	4.26978	3.82171	3.27352	4.35191	3.5373	3.75382	3.21412	3.7845	3.94392	3.6565	3.21412	3.61941	3.94392	4.13996	2.57531	3.90304	3.67469	4.24565	3.23266	3.41684	4.18666	3.78241	3.97453	4.2502	4.50208	3.70487	3.79494	GOPC	TRUE	0.110559
													4.02414																ROS1	TRUE
1.82375	2.75916	2.27202	2.87774	3.17313	3.16511	2.41143	3.07724	0.214125	2.32481	5.63343	3.06005	2.90881	2.38405	3.59096	3.1177		2.37016	2.51096	3.30743	3.03738	3.66107	3.56925	3.23573	2.81147	3.0054	3.25096	3.38957	2.86394	USP28	TRUE	0.294195
3.34767	2.90881	3.42089	0.722466	0.495695	3.35332	1.52105	3.34483	2.59694	2.99458	2.93923			1.54597	4.39643			1.70044	1.81147	1.90689	3.32481	0.378512	3.33199	3.86888	2.75916	2.61824	1.28096	4.04002	2.76341	HDAC9	TRUE	0.437026
4.3512	3.59455	2.97636	3.57773	3.24945	3.6792	3.57894	3.46728	3.36457	3.71809	4.12846	2.38957	2.35332	4.17552	3.68032	2.76765	2.66903	3.80012	3.0018	3.04614	2.84197	3.51854	2.72683	3.54844	4.19771	4.16108	3.24336	3	3.66107	TSPAN17	TRUE	0.160992
3.09592	4.0321	2.78031	3.75489	3.26903	3.22805	3.91265	3.41414	4.9528	1.20789	3.51223	2.28096	3.12928	2.82579	2.94486	2.852	3.34199	2.88362	2.84599	2.5509	1.9222	2.99458	2.62994	2.58015	2.08746	3.56194	2.78031	4.06609	3.08576	NOP16	FALSE	0.238085
2.5656		3.29719	1.14405	1.45418	3.69711	3.06523	5.7447	0.298658	3.52482	0.575312	4.18349		1.49057		2.94673		1.926	2.42223	3.05137		0.584963	3.43029	1.40054	1.73552	2.1635	2.82782		3.3505	CC2D2A	TRUE	0.52721
4.5008	3.76977	3.89724	3.19219	3.76129	3.23573	3.46205	3.93734	2.95606	3.07211	3.39506	4.3427	3.0054	3.96625	3.3147	3.18428	2.38681	3.32912	3.25701	3.21101	2.79077	3.18587	2.87578	3.28096	3.14731	3.98459	5.32121	3.64962	3.37851	RRM2B	TRUE	0.168473
2.79909	3.32193	2.28392	2.95606	2.73118	2.8953	2.99639	2.80323	3.73444	2.49825	0.731183	2.94111	2.5656	2.72901	3.87283	2.76765	1.51602	2.55582	2.57531	2.774	2.01792	3.20006	2.75489	3.40054	3.21257	3.43829	2.8679	3.26303	2.95606	ZNF800	FALSE	0.221983
1.30451	3.16832		3.80632	4.40599					2.20477					3.55582					4.22959	1.94111	4.04963	0.214125	3.02857	3.13093	0.411426		5.54319	3.59694	TNFRSF17	TRUE	0.504575
1.91073	2.63923	2.53605	1.62293	0.748461	2.19535	2.73985	2.854	3.01614	2.76977	1.26303	4.35755	0.765535	2.53356	3.65306	3.13422		2.7137	1.36177	1.57531	1.73118	1.16993	2.62761	2.82375	1.39506	2.36457	2.29866	3.64386	2.56316	SNX29	TRUE	0.379145
3.74201	1.63691	6.01302	0.85599		2.67129	0.887525		4.38957	2.89142		1.46467		5.34163		2.88947	3.89239		1.9782	5.21257	0.807355		3.73227				4.38267		4.95652	LMO3	TRUE	0.520991
4.17393	3.98003	3.81762	4.21956	3.74953	4.30597	4.86096	3.49442	3.5472	3.35473	5.28207	4.10182	4.29205	3.70377	3.90881	3.36317	2.9486	3.81044	3.774	4.03738	3.94205	3.66107	3.904	3.53356	3.8339	3.99186	4.40395	4.43962	4	MRPS10	FALSE	0.116979
																									3.36317				GUCA1A	TRUE
4.26604	3.85997	4.55397	3.06178	2.72247	4.40667	3.52607	3.95513	3.19219	3.44626	2.62761	3.92884	1.15056	3.29131	3.90207	4.48993		3.74093	3.15543	3.22805	2.1375	3.1375	4.30086	3.52857	3.91456	4.47508	4.13668	3.22342	3.81865	RSF1	TRUE	0.216913
2.31904	2.18269	2.94111	2.79286	2.11103	2.68482	3.14241	2.04963	2.13093	2.13093	3.0072	3.44095	0.765535	2.11103	2.95791	3.14078		2.47508	3.02326	2.5509	2.61589	1.3505	2.57531	2.30743	2.72901	2.37851	3.39094	2.19849	1.85599	VPS13D	TRUE	0.2384
2.65306	4.97407	4.48285	3.68482	2.51096	3.75809	4.61412	2.99095	5.39094	4.1375	4.51728	0.815575		4.46858	5.75328	5.15745		2.78031	2.97269	3.8846	1.20163	3.30012	4.10852	4.50271	2.07382	2.76553	2.43029	4.20789	4.36947	CELF2	TRUE	0.337595
5.22997	5.55582	4.46858	5.79727	5.50621	5.32876	5.11728	5.50526	4.98596	4.96255	5.21956	5.18507	5.1177	5.04439	5.17951	4.80064	4.91982	5.46728	5.28318	5.7137	5.12887	5.43763	5.06523	5.19731	5.94509	4.08321	5.30889	4.96301	5.21723	FAM120A	TRUE	0.0717493
3.06523	3.5741	4.12928	3.64501	2.15056	3.35473	2.70044	2.73769	2.03914	2.67807	0.879706	2.74846	1.97453	1.65076	3.67129	2.27798	1.9486	1.97453	2.3978	3.43429	1.83996	3.08066	3.26903	3.20633	2.73985	3.90304	3.42223	4.12516	3.45022	R3HDM1	TRUE	0.285889
0.0426443	0.790772	2.81558	0.555816	1.65076	2.05658		0.731183		3.56316		1.17632		0.226509	0.903038				3.73118	0.925999	3.56438	1.73985	1.31615	1.32193	3.81558	0.111031		0.678072	1.17632	COL9A2	TRUE	0.784312
0.722466	1.95606	0.933573	2.488	1.67356	2.97453	3.59455		2.22651	3.21723	1.58015	2.22959		3.59813	0.83996	1.22033		2.62293	2.28096	2.3978	2.32769	1.64616	3.82985	0.641546	3.56803	1.84398	0.85599	1.33914	3.47508	KITLG	FALSE	0.460731
2.07382	1.08406	2.17313	2.06005	1.66448	2.58256	1.96717	2.25399	1.66448	1.61353	2.09085	2.29572	1.60407	1.35614	1.29278	1.5008		2.08066	1.04264	1.82782	1.48543	1.39506	1.75702	1.29866	1.26903	2.07724	2.20163	2.06005	2.0072	ERCC8	TRUE	0.227348
					0.124328				0.263034																				ADAMTS6	TRUE	0.5064
3.70044	3.28096	2.15056	3.17313	3.14241	3.94111	3.41278	3.59574	3.93829	3.58736	3.19692	2.41954	3.31904	3.65421	3.46728	4.94205	2.70487	3.73118	3.46467	3.01257	5.56621	3.52105	4.26303	3.66107	3.91648	2.98914	2.75916	3.03914	3.0268	H6PD	TRUE	0.197552
6.02835	5.3875	5.20672	5.98413	5.70764	6.03012	6.17532	5.48059	6.22997	5.71397	5.76288	5.91624	5.76368	6.41041	4.84046	5.75061	4.03562	6.15785	5.38509	5.98391	4.83491	5.42694	6.1334	5.49249	5.91073	5.63604	5.59515	5.24489	6.05224	VAMP3	TRUE	0.0886587
2.99095	0.948601	3.39369	2.44361	2.1375	4.0635	4.08746	2.78031	1.26903	3.60881	3.27352	3.59096	3.99277	1.75275	1.43829	3.89724	1.54597	0.432959	3.54844	2.4489	2.86987	1.54597	3.67582	3.18745	4.28836	3	3.61706	2.06695	3.49185	PER3	TRUE	0.37705
1.8953																													UTS2	FALSE
	2.0072													3.08236									1.74416				2.59216		TNFRSF9	TRUE	0.254545
2.30451			1.1177	2.38957		3.51475	2.22033		2.42223	0.678072	0.389567				3.13093	3.32481	2.48543	4.30232	1.20789	1.5656	1.58496			4.93452			0.443607	1.23266	EPN3	TRUE	0.593587
3.56803	4.04876	2.01792	3.63923	3.20477	6.26134	4.72356	2.46989	3.8339	5.86814	5.765	5.39609	2.79286	4.18031	0.895303	4.81096		5.96347	4.66334	3.99095	0.978196	2.41684	6.08151	3.16027	4.19535	4.50335	2.74846	4.04789	5.09677	LTBP1	TRUE	0.366235
4.2149	4.40667	4.07639	4.1635	3.79494	5.24982	3.51728	4.48607	4.51475	4.24793	2.7761	3.50208	4.86691	4.0781	2.64847	4.97039	2.69599	5.60348	5.15664	2.98003	5.32445	4.02591	3.86295	2.53854	3.56194	3.43829	4.38681	2.71809	5.14282	RCN1	TRUE	0.220052
3.58135	4.56255	3.70598	1.61353	2.85	3.35755	5.73173	1.5509	6.49873	6.10559	4.22882		1.926	6.62498	2.9542	3.7126	5.67976	5.14731	5.11228	3.07553	2.76341	2.20789	4.29939	4.18745	2.96347	4.43363			6.92053	ELN	FALSE	0.383467
2.93168	3.62176	3.25399	4.6311	3.04963	3.17473	3.77821	3.40599	2.46728	2.74631	2.79701	2.70044	3.35614	3.37712	3.5008	3.29572	2.73552	3.7666	2.88362	3.57652	3.04264	2.76129	3.15704	3.24336	2.96162	3.0321	2.63459	4.66164	3.14405	RFC2	TRUE	0.160494
3.08066	3.21101	3.32912	3.26754	3.27352	3.88947	3.69265	4.05398	3.27501	3.75061	2.72683	3.31325	1.87971	3.22959	4.10014	4.70598	3.12928	3.10769	3.6241	3.36177	4.02768	3.44228	4.23573	3.9991	3.68594	3.09761	3.9364	3.59932	3.79077	ARID1B	TRUE	0.15248
4.51223	5.07767	3.80219	4.10182	5.24527	4.52857	4.31179	4.52607	4.23189	4.79805	4.07382	4.37295	4.88606	5.18587	4.63343	4.12019	5.05311	4.40667	4.82069	3.7761	5.62965	5.04221	3.89239	4.74631	5.75435	5.1635	5.0505	4.43363	5.25512	CLPTM1L	TRUE	0.112331
3.13586	1.87184	3.04089	4.99865	3.83794	1.61353	1.86394	3.49057		2.88557	3.66789	5.2604	2.98732	4.77189	0.137504	0.722466	5.23573	2.82782	5.51854	4.37851	4.54411	3.97636	2.80735	1.25096	4.92884	3.49185	2.61824	2.1375	2.53107	NEDD4L	TRUE	0.440556
	1.34483													1.93734									1.27501					0.400538	FOXP3	TRUE	0.510959
1.64616		2.84398			1.28096		1.07039		1.12433	3.22188					1.3505		0.163499	1.66448							0.895303			0.933573	PPP1R3F	TRUE	0.595234
5.75676	5.45022	3.8885	6.50239	5.9331	5.76261	4.83744	4.8535	5.95838	6.26641	6.234	5.83542	6.06178	6.20535	4.82985	5.16672	5.32445	8.66548	6.4348	6.15684	5.57259	5.94158	6.00113	5.17632	6.32427	4.70874	6.04527	4.84147	6.09677	HEXB	TRUE	0.14712
2.13422	1.71809	1.70487		1.20163	1.69153	1.52105	1.79909		1.02148	2.81147	1.42761	0.594549	0.356144	1.54597	1.31034		0.263034	1.23266			0.575312	1.37295	1.09085	0.250962	1.91839	2.26903		2.25701	PTCD2	FALSE	0.486215
4.7703	3.96809	4.0009	4.20398	3.37156	4.40395	3.21412	4.94813	3.91648	4.25927	3.3147	4.93876	4.03562	4.34979	3.82273	4.18666	3.06178	4.45022	4.39643	4.37016	3.65421	4.0063	4.31904	3.96625	4.44626	4.66448	4.38957	3.8268	4.54782	JKAMP	FALSE	0.117065
6.07617	2.24489	6.26303	2.87578	3.70266	5.73471	4.65134	2.53356	2.42761	6.2604	7.59328	3.2555		5.7241	3.1177	5.1914	3.16672	4.83592	5.38509	3.25096	3.80323	3.54226	4.6427	5.10643	4.35332	5.0917	3.60526	1.42761	5.45812	DKK3	FALSE	0.339825
			2.68706	3.50589	1.4957	2.93168	2.86196	0.475085	2.01078		2.02148	1.15056	2.19535	0.831877	1.24489	1.77821	2.08066	3.22497	2.80529	2.39232	3.16993	1.28096	0.831877	3.24945	0.400538	3.94579	1.57531	1.13093	ARHGEF5	TRUE	0.487636
1.36737	1.79077		1.42223	1.66903		0.176323		1.75275			0.604071		0.545968	1.69153			2.86394	0.263034	0.344828		1.18269		1.26903	1.28096			1.67356		NFE2L3	TRUE	0.572649
2.19219	2.53605	3.67243	3.06695	3.37434	2.5435	2.90111	2.21412	1.66448	2.15056	3.64847	3.926	2.66448	3.49697	2.04264	1.40599	1.44361	2.61353	2.83188	2.96162	2.17313	3.67129	2.01792	2.44626	2.33342	2.21101	4.20867	3.19849	2.14405	MCUR1	TRUE	0.275338
5.21645	5.10894	5.18943	6.95093	6.49586	5.05441	4.72683	4.95187	6.21199	5.84423	3.42761	5.58256	3.24945	5.10182	4.50779	4.02414	3.10434	5.69209	5.31868	6.81826	5.16551	6.42593	5.81711	5.08279	6.39883	4.04701	3.10434	4.66107	6.10077	LIMA1	FALSE	0.210179
4.88947	3.93829	4.08661	5.26903	5.52262	4.65992	4.03562	5.39335	4.58376	5.43896	3.66448	5.11562	4.77505	3.9982	4.44294	5.50621	4.52168	4.12681	4.55766	4.52669	4.75862	5.05702	5.2521	3.83693	4.59395	4.06178	5.774	4.75862	4.58496	LETMD1	TRUE	0.121832
0.757023		1.82375													1.71809										2.10434				SLC4A8	TRUE	0.365851
2.28983					0.963474			1.18903	1.42761		0.495695		1.60407				5.15218	0.659925					3.43429		3.89336			1.9222	LAMC3	TRUE	0.705928
2.77189	1.39506				5.62498	2.12433		4.77083	3.55213		6.18527							0.400538	1.83188	3.16189		7.04647						1.90304	PTGER3	TRUE	0.612959
	2.83188																										0.250962		TNIP3	TRUE	1.18396
4.18903	3.72028	4.67016	4.24108	3.78869	3.60526	3.70929	3.60763	3.22959	2.88362	3.94298	3.91839	3.04089	3.88264	3.58256	3.21723	4.19849	3.64731	3.61353	4.33128	3.30012	3.89433	3.65764	3.41549	4.21257	3.83794	4.59932	3.98368	3.78241	MAPK9	TRUE	0.113089
				1.31034	0.963474		0.0426443			3.48285								2.14405			2.0072			0.286881	0.695994	2.32481			COL23A1	TRUE	0.75298
2.37851	1.87578	2.88362	0.176323	4.29278	2.39506	0.925999	1.0635	3.61706	3.49057	2.90881	0.790772	0.526069	3.35332	0.505891	2.15704	3.72465	4.38267	2.65992	0.275007	3.94111	4.40531	1.65535	4.08491	4.02148	3.80219	0.526069		2.54102	BCAR1	TRUE	0.574063
3.37016	3.39094	3.04789	4.3067	4.58976	3.74308	3.04614	3.94017	3.69599	4.28021	2.59932	1.54102	3.0072	3.09592	3.75702	3.89627	3.64039	3.25248	3.9364	4.2854	3.5741	4.76871	4.04177	3.59932	4.17473	4.16269	3.44626	1.852	3.94767	FAM160A2	TRUE	0.203175
6.2114	6.41616	3.84097	6.66334	6.34234	5.86567	4.97269	5.7658	5.87971	6.17632	5.70404	7.37243	6.37382	5.81711	5.80503	6.06695	7.55919	5.66021	7.54381	6.88387	6.78411	6.05528	6.1823	5.93263	5.95187	4.56682	7.24041	7.54651	6.36807	HERPUD1	TRUE	0.137269
2.774	2.65992	3.5472	2.26903	1.90304	2.97636	2.81967	1.42223	2.82579	4.11603	3.08406	2.58496	2.43829	4.04701	1.25096	3.35614		3.44361	2.7866	2.37851	2.73985	2.06005	2.45681	6.10622	0.782409	1.32769	3.91934	1.47508	3.98823	HOMER3	TRUE	0.397239
	2.01078		3.77821			0.0703893			0.137504				0.422233	1.45943			2.20477		2.48285		0.321928			1.41684	3.60407		3.69042		RAD51	TRUE	0.77703
	0.250962		1.05658																0.575312						0.871844		0.669027		POLQ	TRUE	0.446354
3.17792	3.62293	4.16511	4.07039	4.16832	3.04614	3.87676	4.06695	2.76341	3.33914	3.40599	4.73931	2.85	3.06005	3.50843	3.19849	3.3799	4.33485	3.7666	4.10852	4.3427	3.90785	3.47249	3.26903	3.89918	3.27053	5.81173	3.47768	3.13914	PIK3CB	TRUE	0.172982
5.46858	7.68096	2.82579	5.90545	7.04603	5.48059	4.70432	6.13175	5.90569	6.70681	4.02857	3.67356	1.69599	7.01948	6.92351	4.27501	5.49953	5.86962	4.22419	5.64443	5.36387	6.97223	3.70266	7.80206	6.51017	3.43829	3.67243	6.75034	6.33396	CYBA	FALSE	0.28339
2.85997	3.23573	3.62644	5.79572	4.51916	5.16229	5.59515	4.54102	3.42358	3.47508	1.67807	4.7301	5.13545	3.73877	4.6241	4.30743	1.40054	4.66505	4.14078	4.56194	3.33628	4.07639	4.66164	4.07296	4.58195	5.39712	4.79701	6.08958	4.23343	THOC3	FALSE	0.254775
4.19377	3.72356	1.24489	4.23726	3.56803	3.51096	5.17832	3.75061	5.51254	4.00988	5.67525	3.34483	3.96347	4.14405	2.43829	3.02503	2.76553	3.23726	5.29572	4.51728	4.10769	4.10769	3.51854	2.79077	4.24565	2.31325	2.98732	4.03034	3.7301	HEBP2	TRUE	0.259586
2.32769	3.02503	2.19849	1.94111	2.40327	2.41143	2.53605	2.63923	1.04963	1.81558	1.67807	2.47508	3.3799	0.443607	2.89724	1.40054	1.36737	1.852	1.70044	2.25701		2.17313	1.66903	1.98185	1.848	3.8846	1.98914	3.12102	2.16672	MPHOSPH9	FALSE	0.330115
4.72192	1.39506	2.21723	3.37434	3.35473	4.45549	4.18349	3.84699	2.0321	3.56803	4.82629	5.01748	3.05137	3.37295	1.1177	4.45943	2.45943	3.36737	3.77505	3.71589	2.99458	3.53232	4.37365	1.18269	4.15381	4.28021	4.1127	1.55582	3.58015	PLEKHA5	TRUE	0.328439
	2.37295		5.75355	6.79312	4.05832	4.8525	3.66107		5.77716		4.26003	2.79286	5.50335			6.41092	6.24888	6.14486	5.02901	7.21665	6.77479	2.78241		6.3579		5.33092	2.21101	1.93734	PRSS8	FALSE	0.344401
2.90881	3.45022	2.16993	2.82782	2.80323	3.76553	2.96532	2.40599	2.65535	2.16993	2.20163	3.01792	2.8953	2.65535	3.41007	2.83794	1.74846	3.06523	2.68706	3.07895	2.22033	2.98003	2.86987	2.86592	3.22959	2.89336	4.02857	3.37016	2.70929	SIKE1	TRUE	0.171866
2.51854	3.03386	2.16027	1.28688	2.16027	2.10098	2.33342	2.65535	3.18745	1.18269	3.1127	0.731183		2.26003	2.15704	1.92979	3.37434	1.43829	2.09761	0.505891	2.68482	1.37295	1.43829	2.03914	1.52105	3.27202	1.90304	1.26903	1.67356	RRP12	FALSE	0.369891
2.85798	2.35896	3.38681	4.59991	2.40054	3.35896	3.73118	2.31904	4.52419	3.8748	3.82477	5.74631	5.67073	3.9364	2.24184	3.29278	3.74631	4.28244	3.81967	4.00988	3.41684	2.52607	3.5656	3.12433	4.28688	3.21257	4.41414	1.23266	3.39094	FNIP2	TRUE	0.277164
6.10476	4.33128	6.29076	5.21374	4.59335	4.36737	6.19633	4.28096	3.03562	3.18428	4.02503	5.20124	7.89827	6.26679	3.53978	3.58376	3.63691	3.59574	5.87234	4.05832	3.49313	4.44228	3.49825	2.82579	5.36142	5.58556	4.28836	4.74953	3.34056	MSMO1	TRUE	0.267137
4.06264	3.73877	3.63459	4.21412	3.97453	4.25399	3.30451	4.42358	4.38474	4.08151	2.81762	4.23573	4.73985	4.06523	4.13175	4.63807	4.76235	4.24793	4.57107	4.05918	4.853	4.17951	4.49506	4.11103	4.42828	4.22728	5.55796	3.96625	3.72028	TTC17	FALSE	0.119841
					0.475085																								ALX4	TRUE
		0.632268																										1.89142	FSTL4	TRUE	0.705598
4.68426	4.19849	4.17313	4.58976	5.32373	4.56255	5.57107	3.29131	5.67327	4.95791	4.44493	3.79286	5.09424	4.23726	5.48156	5.43196	2.75916	4.44294	3.89627	4.60348	4.0321	5.25663	5.39678	4.21568	4.66278	3.65764	3.81558	4.92979	5.2521	FOXN3	TRUE	0.159132
0.978196	0.748461		0.201634	1	3.26754	1.81147	2.29866		2.32481		0.887525		1.10434		2.22959			0.992768	2.79077			2.5008		0.887525				2.42492	METTL24	TRUE	0.544599
5.13545	3.72574	3.91361	4.55029	6.1416	4.774	4.53419	5.2854	4.48478	4.91791	4.46663	5.13545	4.90159	4.21101	3.93829	5.17313	4.37365	4.0268	4.66221	3.91361	4.52607	5.86443	4.09761	4.06867	4.7447	4.1102	3.63807	3.74308	4.41886	AKR7A2	TRUE	0.136049
3.17632	3.76871	3.35755	3.96993	3.01614	3.69265	3.49953	4.03738	3.74631	2.55827	3.14241	2.76977	2.69377	3.25399	3.20477	3.49825	3.29425	3.01078	3.40599	3.39369	2.85997	3.82985	3.36597	2.9486	3.0635	3.29425	3.2032	4.06437	2.89918	MRTO4	FALSE	0.120962
3.50208	1.07724	4.46205		1	2.72028		2.59216	4.02857	0.748461				0.0426443	0.0426443			7.11956	0.575312	3.60763	1.43296					1.42761			2.13422	NNAT	FALSE	0.83603
4.29278	3.87283	4.6094	3.32912	3.46597	4.0917	3.34625	3.88753	3.95977	4.44228	4.82324	2.96717	3.89045	3.9782	4.17233	4.30451	4.40259	3.46597	3.70598	2.84599	4.85848	3.38957	3.47119	3.97636	4.21801	3.26303	3.44758	3.60288	4.20085	USE1	FALSE	0.134613
2.86196		2.93923																											MCF2L2	TRUE	0.0188372
1.62761	0.887525	2.06695	2.14405	0.956057	2.31325	1.07724	0.731183	1.10434	2.35896	1.29866	2.28983		0.367371	1.7137	3.04963		0.970854	1.02148	2.11437	0.895303	1.26903	2.73769	3.0036	1.73552	1.21412	0.978196	1.41684	1.5008	NRIP2	TRUE	0.453331
	1.19535		2.60881	3.26153	2.52105	1.98914	3.39643	0.475085	2.19535				3.34767	1.46989	1.64616		5.59455	2.34767	1.34483	1.94111	3.95233	2.76977		3.93734	0		0.389567	2.32481	LAMA3	TRUE	0.575249
3.91934	3.41549	3.49697	4.50779	4.5008	3.41007	3.6893	3.14405	2.7845	2.99277	3.82579	4.58195	3.46728	2.9982	3.41684	2.40599	1.51096	2.91648	3.02503	4.3427	3.16027	4.46401	3.20945	3.32048	3.45943	3.33914	3.98003	3.86592	3.22497	AP5M1	FALSE	0.19451
3.49953	3.69488	3.42358	3.3978	3.01792	5.01748	3.33914	5.64126	2.6893	3.36036	3.16832	3.08236	2.87774	3.19061	3.88655	3.30597	2.41684	3.62293	3.20633	3.9644	2.8339	3.45943	3.58496	3.72465	3.39506	3.75168	3.23419	3.68706	3.48671	ANAPC4	FALSE	0.179995
6.39815	1.65992		4.35685	5.20594	2.5656	0.464668	3.36036	2.97085	4.01703	4.3875	3.61471		3.55949	1.98185		4.62	2.56803	2.5509	3.12763	2.50843	4.45746	1.52105	2.32769	4.39917	0.263034	5.30195	0.356144	3.08746	KCNQ1	TRUE	0.496525
5.30706	4.7021	4.04963	5.26679	4.49889	4.93026	5.13299	4.95606	4.44029	4.95977	4.69377	5.2521	4.87086	5.16952	4.36457	4.26529	4.75114	4.71918	4.74846	5.15381	4.86394	4.65421	5.17513	4.5735	4.39232	4.94392	5.4822	5.45779	4.9279	TRAPPC3	TRUE	0.0744735
4.77083	5.32697	4.36177	5.12763	4.57289	5.24982	4.99095	5.23304	5.02281	4.73498	4.89288	4.92552	4.83036	4.79181	5.71149	4.98231	4.34341	4.84649	5.32553	4.99548	4.68201	4.78921	5.20945	5.40429	5.12557	5.22959	5.2075	5.69293	4.79494	THRAP3	TRUE	0.0664145
5.19298	4.1819	4.74739	3.95047	4.6837	4.94298	4.62877	5.28873	4.2854	5.10518	6.87934	3.80116	3.18587	4.61589	3.9222	4.63575	5.71315	4.65134	5.74281	3.78764	5.79155	4.9222	3.7137	4.57713	4.64616	4.49313	4.82934	3.46728	4.65707	PHPT1	FALSE	0.16731
		1.66448	1.87578	3.06695	1.1635		2.10098		2.09085		0.31034							3.41819	0.918386		2.69153			2.86987	1.02148				ENTPD2	TRUE	0.497233
1.41143	4.06523		2.9542	4.02326	0.495695	1.63227	2.96717	1.04264	2.43296		1.91839		2.15704	4.74308	0.0285692		0.333424		2.59932	2.25096	4.06091	1.18269	3.84298	2.28688			4.00809	2.04264	LY75	TRUE	0.562838
3.45549	3.90497	3.61471	2.78031	3.27202	3.85	3.24793	3.32193	3.29131	3.44493	2.31325	3.19219	2.27501	3.58376	4.34127	3.94017	1.75702	3.37434	3.75916	3.5472	3.12267	3.06867	3.99095	4.11853	3.85499	4.33985	3.6241	3.94579	3.41819	ARID4B	TRUE	0.173285
1.08406	1.70487	0.85599	2.43029	0.286881	3.52857	1.23266	1.50589	1.79909	1.5509		1.31615	3.07382	2.49313	1.97453	0.604071		4.04963		2.12763	1.18269	1.32193	0.226509	1.88362	0.275007	1.96347	0.495695	1.40599	1.02148	OPN3	TRUE	0.606469
3.19535	3.16832	3.66221	2.96162	2.61353	3.14405	2.86592	3.71918	2.96532	3.44095	3.06695	3.5509	1.95977	3.61353	3.0072	3.28983	1.88362	2.89336	3.25399	3.13586	2.91265	3.0197	3.21412	3.17632	3.29572	2.95977	4.56621	2.89724	3.36597	SDCCAG8	FALSE	0.158231
4.56742	1.4957	4.75702														5.01123								3.21878					PTPRN	TRUE	0.385275
1.94486				0.344828	1.75275	0.704872	2.19535	0.807355	2.04264		1.69153		1.11103		1.0635		0.731183	2.10769	1.30451	0.895303		1.09761		0.516015	1.09761	2.33056		0.565597	HHAT	TRUE	0.492957
3.93074	2.39232	5.28355	3.03562	2.93546	3.45154	3.82985	2.80941	3.58616	2.67356	3.87578	3.97545	2.18903	2.93168	1.58015	3.63343	2.35614	2.91456	2.82579	3.21257	3.1177	2.56803	3.62059	2.45943	2.19535	4.02503	2.79286	1.65535	2.7845	KIF1B	TRUE	0.25872
2.19219		0.956057			0.163499	2.31615	0.176323	2.35896	2.31325	1.24489	4.24336		1.24489	0.378512	1.4489		1.31034	2.58015	0.782409	6.99786		1.17632			1.47508	2.21101	0.871844	2.46728	FOXC1	TRUE	0.823544
3.26153	3.99458	2.30743	3.86394	4.17552	3.33771	3.61824	4.07553	3.40054	4.14486	3.73985	3.14078	3.09592	3.79286	4.4019	3.37434	3.47508	4.09424	2.66903	3.18745	3.92125	3.80632	3.14893	4.21801	4.17313	2.87184	3.70044	4.26903	3.85997	TBC1D22A	TRUE	0.143571
3.60644	3.0054	3.31325	4.17473	2.7845	2.97085	2.64847	3.52857	2.73335	3.93074	5.23649	5.05615	2.53107	4.10014	3.8268	5.23266	4.51475	3.61589	3.0635	4.23802	3.50716	3.21568	3.2765	4.22574	3.99729	4.8212	4.09592	3.31325	2.43296	SYNE2	TRUE	0.216084
2.25399		4.64328	2.35896	3.49697	1.34483		2.36737		0.613532		0.887525					2.31904		3.52857	1.67356	4.5404	3.3799			2.926	1.38957	4.58075			PLEKHH1	TRUE	0.491213
3.37295	1.98914	6.18963	4.07039	3.39369	2.94486	3.73227	4.39163	4.0365	3.60644	2.87184	3.32048	1.37295	3.07895	1.47508	4.00809	2.98368	2.15381	3.93168	3.86196	4.12516	3.68706	3.51475	0.748461	4.89336	4.65821	4.15381	1.53107	2.50843	ATP9A	TRUE	0.354054
																									2.79494				SPO11	FALSE
4.18903		1.54597			0.650765										0.879706									0.250962	1.63227	1.29866			CBLN4	TRUE	0.863125
	6.51948		0.0840643	0.298658	7.35562	2.45418		0.722466	6.24755		1.0072							1.85599	1.64616			6.87689			1.774		0.214125	4.27873	CHRDL2	TRUE	0.921354
3.38681	3.18269	6.0197	2.95047	2.848	3.69265	3.39232	3.50335	3.40599	3.98277	2.774	3.83086	2.26903	2.88947	3.12102	4.00988	2.10098	3.34625	3.34767	3.35755	3.1811	2.64386	4.11936	2.95606	3.1811	2.64616	3.64962	3.09761	3.2854	FAM168A	TRUE	0.213444
0.0976108	3.30597	0.0703893		0.238787				1.3505	1.1635				1.33342	2.73985			1.7866				0.400538		3.15866		0		0.367371	0.613532	RELT	TRUE	0.978557
3.95884	3.85	4.01436	3.52482	4.46858	3.3147	2.32481	4.5008	4.02503	3.91073	2.774	4.34127	2.99095	4.2032	2.75061	3.53978	2.1177	3.57773	3.63575	3.80941	2.67582	5.49346	2.79701	3.43962	3.75809	4.56499	4.00988	2.29278	3.32625	GALC	FALSE	0.216434
4.56316	5.374	4.29057	4.94251	4.6011	4.77241	4.64731	4.99005	5.21878	3.94767	3.97177	3.93734	3.73118	4.42492	5.32984	4.44294	4.22651	4.38957	4.90448	4.69321	4.37156	4.42828	4.53481	4.73552	4.56621	4.92932	4.58256	5.68285	4.31904	NOP58	TRUE	0.0982557
5.13258	5.33664	3.854	5.19535	5.17752	5.47735	5.29902	5.12309	5.27836	5.19377	5.09508	4.59872	4.13504	5.30998	5.36317	5.50271	4.33414	5.19574	4.78188	4.82324	4.40463	5.1914	5.3067	5.19731	5.05224	4.0027	4.79805	5.02192	5.44956	SZRD1	FALSE	0.0903158
1.33342	0.356144	1.54102		1.10434	2.19849	0.298658			1.83592	3.07211						1.67807	0.189034	1.81147	0.555816			1.88362	0.0143553	1.60407	4.36877			2.68482	KCNH2	TRUE	0.728581
4.54411	4.71864	4.25701	4.27277	4.25096	4.54597	4.75702	4.31252	4.35896	4.22342	4.57652	4.40667	4.48929	4.47897	4.75061	4.69432	3.91743	4.71149	4.30597	4.67186	4.04002	4.33771	4.62527	4.51979	4.22265	6.17951	4.58075	4.8485	4.87725	CUL1	TRUE	0.0872216
3.30743	3.78555	2.94111	3.05485	2.90881	3.3799	3.36457	2.75916	2.82782	2.92979	3.47508	3.58736	3.24031	3.08916	3.17153	2.5656		3.23113	3.09761	2.92979	3.36177	2.72683	3.10936	3.27798	3.17153	4.72846	3.34056	3.73769	3.1375	FAM114A2	TRUE	0.128347
3.52231	4.80993	5.36912	3.29425	2.29866	1.95977	1.774	2.88557	1.74846	3.09424	2.68706	7.39541	2.79494	2.94673	5.69377	1.93734		2.73552	1.66903	2.65306		2.926	2.43829	5.0691	2.60644	2.8953	3.64962	5.57773	2.72028	CYFIP2	TRUE	0.433111
4.52042	4.79181	4.54844	4.90497	4.34412	4.8679	4.94907	4.45878	4.34979	4.26303	4.16912	4.93452	5.19022	4.53916	4.9982	4.95652	4.04701	4.36317	4.54473	5.03386	5.55244	4.33056	4.95699	4.8679	4.52669	4.4363	5.04658	4.916	4.80941	TAB2	TRUE	0.0737809
5.0993	4.23266	4.40803	4.7241	4.12598	5.2854	4.91504	4.7939	5.25852	5.08534	5.64039	6.04352	4.81455	4.90014	3.90881	5.21917	4.47184	5.53201	4.854	4.96394	4.49761	4.32912	5.3505	4.63401	4.60051	5.12887	5.84273	4.23955	5.1807	GINM1	FALSE	0.105804
3.34483	3.48027	3.32625	3.07211	3.14731	3.49185	2.74846	3.0268	3.09255	2.52607	2.07724	3.14731	2.0321	2.75702	2.51096	3.17792	1.53605	3.49697	2.95606	2.88166	4.81096	3.26153	3.38819	3.03386	3.37573	2.24793	3.10936	2.72247	2.86592	EIF2AK2	TRUE	0.198787
4.44162	4.15218	3.36177	3.07211	3.36317	3.56316	3.36597	3.67016	5.53076	4.0072	1.38405	3.39643	0.799087	3.01257	4.12598	4.19849	4.44361	3.46989	3.52356	3.849	3.54597	2.94298	4.04701	3.88362	3.32481	3.87381	3.80012	3.88557	3.99729	USP36	TRUE	0.241834
2.99277	2.9982		3.01078	2.91648	3.96717	2.93734	3.20633	2.42492	2.86592		3.59932	1.9782	2.35614	3.38819	3.88362	1.65992		3.23879	3.43429	3.19849	2.31904	3.33628		3.0993	3.43162	3.43829		2.16672	KMT2C	TRUE	0.194855
4.80374				1.5509	1.20163			0.163499			2.5435		1.67356		0.62293	1.62293				1.61824	2.24793	2.35332		2.44361		1.07039			MCOLN3	TRUE	0.619208
		1.45418			0.85599		0.0840643	1.31034		0.782409			1.61353				2.37295					1.07039							CCDC85A	TRUE	0.564804
4.5552	4.88069	4.88557	4.8674	4.79546	5.0036	4.9991	4.70155	4.24413	4.24031	4.04876	5.05441	4.45483	4.51475	5.22959	5.06307	3.69153	4.76765	4.75756	4.9782	4.30451	4.85549	5.03738	4.90256	4.91361	4.75328	5.38128	5.09255	4.67976	PUM2	TRUE	0.0778559
4.38474	4.10182	2.44626	0.443607	4.50398	4.50335	3.19219	4.40871	2.92979	5.04527	3.2854	2.0072	3.93452	3.92315	2.926	5.0343	5.43463	4.07724	4.95466	0.400538	5.66761	4.20945	1.88753	4.3512	4.1811	2.6017	3.48543		4.26153	MRPL43	FALSE	0.363922
0.773996		0.464668				0.263034						10.6715		0.485427								1.20163	1.03562						ITIH4	TRUE	1.77725
												10.2826																	ITIH1	TRUE
3.9607	3.51979	4.25096	3.71589	3.30743	4.63401	3.64616	3.92979	3.15543	3.33056	4.06005	3.49442	3.4957	3.51728	3.64039	3.77083	2.52607	3.79494	3.58376	3.89724	3.20006	3.15056	4.16269	3.73118	3.58135	3.90304	3.52231	4.10601	4.10434	C4orf27	FALSE	0.112352
4.8495	4.64097	5.39163	4.60999	4.27575	4.93452	4.7339	5.04002	4.51791	4.52795	4.68762	5.18824	4.32265	4.18031	4.53045	5.40259	4.29352	4.84097	4.5735	4.81044	4.34483	4.37712	5.05702	4.33557	4.49121	5.00899	4.9905	4.74631	4.67016	ZFR	TRUE	0.0699585
0.214125	0.765535	0.871844			1.65076	0.214125	0.516015	0.0565835	0.124328					0.910733	0.137504		0.15056	0.400538	0.464668			0.687061	0.739848	0.275007	3.46858	0.15056	0.863938	0.0565835	ZNF280C	TRUE	1.22362
																	0.485427												NPFFR2	TRUE
		1.5656			1.36737										0.250962			0.895303							1.14405				PHF21B	TRUE	0.487556
1.59455	4.3427	2.0072	1.16993	0.613532	0.443607	1.59932	0.815575	0.871844	2.85599		0.321928		1.40054	4.90593	1.64616		0.887525	1.9782	1.67356	0.847997	1.81147	1.76129	3.95791	1.37295		0.505891	3.71589	2.55827	TRAF1	TRUE	0.686468
3.04264	3.29131	3.35755	3.07895	2.51349	3.52105	3.42492	2.76765	2.94486	2.75275	2.62994	3.24641	2.65992	2.66676	3.66789	2.9279		2.96901	2.44361	3.20633	1.71809	2.45943	3.23266	3.19061	3.23419	3.29425	3.10769	3.53481	2.9542	RC3H2	TRUE	0.139676
		1.74846	3.11936	2.17951	3.66334	0.0565835	1.82782		0.378512		5.42257	3.0268	1.33914		0.0840643			0.575312	2.04963	1.5008	1.73985	0.956057		2.01792	0.565597	0.286881			IL17RB	TRUE	0.805928
2.87774	3.21568	0.831877	4.78188	4.34341	4.90977	4.0018	5.09297	3.47249	3.44758	1.59455	1.80323	1.19535	3.71149	3.01257	2.98914	2.32769	3.09592	3.78973	3.83996	3.56682	4.1035	4.16993	2.16672	4.67638		2.82171	4.02945	3.32481	TRAF3IP2	FALSE	0.33089
		1	0.887525		0.847997	0	2.28983	6.10915	0.773996		0.757023	3.86096			0.748461	1.53605		0.641546	1.7866	1.80323		1.64155		0.389567					GYG2	TRUE	0.96748
3.49697	2.04264	1.7866	1.96347	1.20163	4.04789	2.85599	3.93168	2.92029	3.26454	4.6605	3.26754	2.35332	3.33199	1.27501	3.8953	1.46989	2.59216	2.91839	3.22959	2.45681	0.978196	3.8125	0.485427	2.07039	4.69098	3.70819	1.48543	3.04089	DCBLD2	TRUE	0.406365
						8.84175																					4.41075	5.96093	SERPINB3	TRUE	0.351091
7.28207	4.18824	2.71589	3.44361	3.09085	3.25096	2.17313	4.70598	4.33485	3.70044		3.75382	2.774	3.74416	3.60644	2.38128	4.04701	3.7666	4.64039	2.93923	4.89142	3.37295	3.2765	3.44361	3.69153	3.77294	2.74631	3.33914	3.09085	SOAT1	TRUE	0.267571
0.389567	1.73552		5.6453	4.29939	2.03914	2.13093	6.66789	2.64616	2.04963	7.21936	2.61117	3.76765		0.757023	3.0036	3.1177	4.62234	3.37156	5.02104	5.01881	4.01078	3.0635		4.03562	2.34199		2.98368	0.739848	PKP2	TRUE	0.522302
																									1.75275				MSH4	TRUE
												5.72									0.31034								F7	TRUE	1.26865
6.48527	6.96694	5.82222	7.09761	7.07361	6.49265	6.49761	6.27761	6.19869	6.18269	5.62498	6.70915	7.25786	6.2765	6.86357	6.12184	6.2466	6.44245	5.93404	6.63561	6.03254	6.71987	6.38336	6.38629	6.43863	5.98459	6.51254	7.45935	6.34908	GDI2	TRUE	0.0665961
0.275007	3.8339		3.04264	2.41414	2.47508	5.07682	1.40054	2.59455	2.18903				1.51096	2.70929	1.15704		2.39506	0.201634	3.97545		3.38405	2.63227	3.24336	2.42223		3.2555	4.50843	4.15462	PRDM1	TRUE	0.470795
4.83845	3.61589	3.36737	4.64386	4.40327	4.68986	3.95977	4.37434	3.54473	4.22497	3.22342	3.70598	4.17712	3.88264	4.04527	3.92979	2.56316	3.849	3.60763	4.35473	3.18903	4.26828	4.26978	3.02857	3.96347	4.27501	4.52168	4.19298	4.39506	ATG5	FALSE	0.135284
1.5509	2.64616	3.37434	3.76341	3.62176	1.80323	2.15381	1.42761	3.07895	1.79077		2.79701		2.0072	1.79494	2.20163		3.96255	2.82579	3.74201		3.83693	3.18745	2.9982	3.11103	0.422233	3.78136	1.23266	2.79494	TMCC3	TRUE	0.362423
4.93687	4.50843	5.29389	5.20085	4.4363	4.69488	5.13668	4.99005	4.32265	4.47962	5.01167	4.80839	4.67412	4.93593	4.72137	4.59991	4.52544	4.30305	5.37955	5.02768	4.45878	4.52544	5.03958	4.78764	4.63169	5.62205	4.64847	5.39335	4.5656	PITHD1	FALSE	0.0717519
5.09677	3.5656	3.9607	4.0781	3.34483	4.38198	4.08406	3.70708	2.63691	4.06005	3.24031	4.13093	2.69153	3.17153	2.88947	4.69265	3.38267	4.02414	3.98459	4.1914	2.9542	3.29866	4.43496	2.774	4.17712	4.95327	3.76765	4.38543	3.91743	MTA3	TRUE	0.174271
4.07211	1.51096	1.9782	0.400538		2.37573	0.773996	0.0840643	1.9222	0.978196	5.04177	1.59932	1.50589	2.17632	0.807355	2.9279		1.70487	1.23266	1.22651	1.61353		2.24489	0.910733	0.659925	3.04439	3.71589	1.26903	2.16027	USP13	TRUE	0.631157
3.22342	4.20867	2.60644	4.1235	4.05918	3.95233	4.99005	3.49825	3.96532	3.65878	3.08406	3.99548	3.17473	3.66448	4.53543	3.60763	2.85	2.91456	4.86592	4.50271	3.47508	4.0781	3.91648	3.97085	5.00045	4.49697	3.93168	4.22882	3.38819	ATP11B	TRUE	0.161923
	3.62527		3.25096	1.13093	4.07724	1.87578	5.57289	1.14405	2.852		2.25096		4.92884	2.5509			3.74631	2.19219	2.7761		2.08066	1.28096		3.36036	0.189034	4.12516	3.20163	1.26303	LAMC2	TRUE	0.496309
2.37573	3.03562	4.67469	1.5656	0.948601	3.58135	1.91456	4.11187	2.52356	3.50462	2.488	4.48671	3.70487	2.93357	3.83693	3.8268	3.21412	2.41954	3.01078	2.39506	2.39232	0.475085	2.91073	2.78031	3.41954	2.86394	3.65306	3.8748	3.27501	CDK14	TRUE	0.324463
6.19908	6.26941	5.45713	6.33289	6.02436	6.615	5.78947	6.02547	5.88069	6.10371	5.05832	5.77742	5.89797	6.19928	5.52011	5.77109	6.80142	6.26529	6.60555	5.75969	7.22188	5.8212	5.94953	5.44692	6.35738	5.32193	7.05572	5.97591	6.12371	SEC61A1	TRUE	0.0815686
4.05918	4.7301	4.41075	3.93168	4.15704	5.80219	6.56727	4.0054	4.12433	4.88118	3.2765	3.9982	1.90689	3.79909	4.67356	4.27947	2.18903	4.78712	4.95884	5.91839	3.73335	3.81455	5.88996	4.45352	4.01078	4.64501	4.28762	4.2032	6.29425	PPP1R12A	TRUE	0.235824
		2.9222											2.62761																RASGRF1	TRUE	0.0750683
3.09761		5.28355								4.95884								0.432959						1.67807	0.516015	2.852			CAMK2B	TRUE	0.726853
0.925999	0.575312				0.238787		2.57773		0.925999				1.10434	0.214125	1.29278		0.238787	1.71809		1.18903	0.505891	0.0285692	1.25701	0.895303	0.584963				CROCC	TRUE	0.729706
3.66107	3.10266	1.74846	2.08746	3.27053	3.10769	2.62293	3.17951	2.82171	3.06178	2.74416	1.15056	1.9855	2.65306	2.92979	2.82985	2.78869	2.65535	3.46989	0.669027	3.849	2.9279	2.41684	2.57531	2.53107	3.52857	2.89142	2.16993	3.36877	POLR3E	FALSE	0.259224
4.9364	4.51791	4.88069	3.78241	3.98094	6.93487	5.56163	4.45943	5.31361	4.80632	5.81352	3.71039	2.27202	4.88313	3.88362	5.07852	2.3505	5.36912	4.62877	6.31143	2.01436	2.96162	7.28568	3.86295	3.82782	4.51728	2.61824	3.9241	5.50112	ATP2B4	TRUE	0.291523
4.83238	4.8166	4.79753	4.82477	4.83542	5.08958	4.43496	4.92267	4.63807	4.67073	4.02503	4.97957	4.32841	4.45154	5.39506	4.8885	4.06264	4.87332	4.99413	5.21335	4.72738	4.95233	5.04832	5.21257	5.06996	5.12639	4.86987	5.16148	4.3067	ZC3H11A	TRUE	0.0701318
2.72683	3.16189	2.81352	2.88166	3.06867	3.08406	2.61353	2.62293	3.14241	2.18269	2.26903	2.62527	2.31325	3.3505	2.7761	3.05137	1.82782	2.66448	2.80735	3.47379	2.87774	2.65306	2.35332	2.65076	2.848	2.94673	2.91265	3.39369	2.83996	RIOK2	TRUE	0.132554
4.2817	3.774	2.96717	4.22188	3.48543	3.68145	3.89045	3.89239	3.61117	3.71699	3.16189	4.27798	4.39917	3.63227	3.1127	2.91073	2.98914	4.11187	5.34731	4.18507	4.17233	3.41549	3.25399	3.53232	4.19849	3.9607	4.70099	4.24869	3.95699	YIPF1	TRUE	0.145605
2.21723	3.10769	1.68706	3.67016	2.80323	2.81558	2.49057	2.90881	1.63691	1.7137	1.20789	2.65076	2.12433	1.94111	2.55827	2.08066		2.44095	1.85599	3.06178	1.60407	2.6017	2.36737	1.95606	2.62761	3.06523	2.26303	3.62877	1.774	NDC1	FALSE	0.257749
1.62761		3.79805				2.48027	2.95606			2.62527	1.1635						1.60407		0.124328		0.226509							1.88753	DGKG	TRUE	0.629905
2.85	2.66903	2.0635		2.20789	2.19219	2.51854		0.400538	3.79805	3.22805			2.34767	1.83996	3.64039		2.16993	2.83996		2.63227	2.1635	1.43296	2.32481	0.765535		0.263034		3.37712	FLYWCH1	TRUE	0.418883
2	1.45943	2.21101		0.526069	1.22033		0.0976108		1.26903					1.83592	2.80735		1.52105	2.33628		1.69599	1.24489	1.79909	2.23266	1.0072	1.52607		0.15056	1.1635	UNKL	TRUE	0.483986
3.75596	4.84649	1.70487	3.55949	2.58976	1.02148	2.03914	2.41684	4.80219	4.18031		1.5656	3.26454	4.03474	3.29572	1.43296		3.41143	2.8679	2.07039	2.56316	3.0018	2.32193	4.72301	2.98914	1.10434		2.53854	4.18745	TBXAS1	FALSE	0.3824
1.27501	2.62059	0.238787	2.34767	2.82375	1	0.831877	1.79077	0.871844	1.774	0.992768	1.22033	1.96717	2.88166	2.03914	1.02148		1.83592	0.925999	1.83592	3.04089	3.34625	2.43029	3.04264	2.38957	2.11103	0.790772	1.774	1.81147	PARP12	TRUE	0.449371
3.58616	4.04614	3.67243	5.76898	6.01011	4.67186	4.03738	4.54288	3.28096	4.22497	2.64847	4.00809	3.17473	3.48671	3.65535	3.82273	4.92077	4.04789	4.337	5.09887	6.74362	5.94181	4.10266	3.10936	5.18864	3.49825	4.71864	4.49442	4.19377	ALDH18A1	FALSE	0.221815
2.40327	2.82171	2.85599	2.90111	2.22959	2.16672	2.37573	3.01614	1.90304	2.23879	1.09761	2.37016	1.57531	2.1375	3.23266	0.650765	1.80735	2.65992	3.05832	2.79286	2.84599	2.18269	1.9222	2.72465	3.20945	2.46989	2.16672	3.11603	1.59455	TARBP1	TRUE	0.265194
3.72137	2.38957	3.61117	3.35191	2.53605	2.33914	3.15543	3.24945	2.37851	2.34767	5.13052	4.08576	4.0036	2.63923	1.99277	3.01078		2.81967	2.20789	3.31615	1.95233	2.46205	2.72901	2.5435	2.27501	3.0054	2.58015	3.09255	2.82171	GATB	FALSE	0.244875
1.90689	5.3837	2.36457	3.82883	4.54102	1.43296	6.23266		4.61412	2.19535	0.739848	1.42223	0.970854	2.59932	1.98185	1.43829		2.72465	1.56071	4.99729	1.37295	4.82629	2.1635	3.40735	3.86394	2.52356	1.47508	3.21878	3.32481	MXD1	TRUE	0.521742
3.1177	3.90111	4.59395	2.80116	3.14568	4.08831	3.60999	3.22497	4.78921	3.23266	2.56803	3.19535	1.88362	3.97636	3.85997	3.30743	1.76553	4.26903	3.2854	3.51854	1.81558	3.20633	4.57289	3.92505	2.98003	5.11061	3.09424	3.94017	3.63343	CDK17	TRUE	0.240114
3.30451	2.17632	1.18269	2.36457	2.64847	2.31325	1.92979	2.28983	2.24184	2.03562	1.5509	3.05137	4.83441	2.04963	1.72247	2.10769		2.37016	2.92029	2.02503	3.13422	2.0036	2.25096	0.659925	1.57046	3.01436	2.43296	1.15056	2.10769	DNAJC25	TRUE	0.349353
4.06695	6.29241	3.61706	1.70044	2.46728	3.32337	2.65306		6.70846	5.66192	2.71149	0.765535	1.8953	4.62644	4.94953	2.42761	2.56316	5.33342	2.85997	4.41752		1.68706	3.43429	3.83289	2.50589	2.09424	2.58015	4.04177	6.96301	SLC2A3	TRUE	0.454766
1.852	0.201634	4.23113		1.5509	3.57168		0.85599		1.8953						1.39506				2.20789			3.30012		2.11103	1.14405			3.30012	PSD	TRUE	0.552965
0.910733	2.56071	1.22651	1.22651	2.13422	1.95606	0.526069	1.21412	1.98914	1.774		0.367371		2.24184	2.22342	0.722466		1.54102	2.37573		1.18269	2.37016	0.650765	2.5008	2.26604	2.78241	0.526069	0.189034	1.88362	CTDP1	FALSE	0.498968
4.94345	5.76474	2.15056	5.3844	4.31107	5.40701	6.76739	5.90521	6.92932	5.62147	8.01056	4.69766	1.41143	5.33914	4.4489	5.20242	5.96255	5.41853	5.79546	5.61559	6.03782	3.99005	5.76182	4.61235	4.70487	6.97762	5.36177	5.05268	5.6879	YBX3	TRUE	0.245718
		0.0976108	3.23879			0.831877	0.584963		0.713696									3.30597	3.22497		0.432959			2.88947			0.389567	0.263034	STYK1	TRUE	0.947665
4.33842	4.87431	5.8212	4.12019	3.5008	4.66562	5.88874	4.66278	5.42626	4.50016	4.7126	6.4363	4.09508	4.93026	5.3837	4.55704	3.05311	4.67807	4.20477	4.63169	3.43962	3.72356	5.02148	4.49249	4.57713	4.79181	4.67243	5.11645	4.69544	WNK1	TRUE	0.156631
4.58135	4.63923	4.27501	4.06953	4.06781	4.30816	3.96532	4.12681	3.61353	3.72465	3.12598	4.40939	2.7761	3.52857	4.63923	3.80116	3.56071	4.07039	4.28688	4.56742	3.34483	4.18031	4.20867	4.39917	4.44824	4.58976	4.25399	4.94205	4.46728	CCAR1	TRUE	0.121444
3.31179	4.06005	3.63807	2.71589	4.10014	3.0072	2.53356	3.26903	3.60051	3.57531	1.96717	2.16672	3.70929	4.31252	3.79805	3.78136	3.21878	3.34767	4.00988	2.19535	4.24336	4.40122	3.37573	4.44626	3.55213	2.44095	2.31325	3.27352	3.48671	OGFR	TRUE	0.209963
1.38957	3.53232	0.31034		0.62293		5.21101		3.31034	1.93734				3.07382	1.38957			2.39232	1.90689				0.333424	1.91456	1.66448	0.0976108		2.87578	3.2854	GNA15	TRUE	0.660812
			0.0285692	7.22853								5.1807									7.87369			1.1375					CREB3L3	TRUE	0.827209
3.21568	1.39506	1.25701	3.21101	2.74201	2.87184	2.32769	3.46989	1.926	3.15056	1.0072	3.48414	4.76924	2.59932	1.51602	2.85599	2.43029	2.78869	3.21878	3.26153	2.49825	2.72465	3.22651	1.66448	2.99458	4.337	3.41007	2.50589	2.71149	PIGV	FALSE	0.310964
0.748461		0.333424			1.89142	0.475085	2.852	1.42223	2.73985	0.704872			3.14893		2.86987	1.65076	3.7366	2.59932		2.79286		0.704872	0.613532	1.54597	1.81147	0.275007		2.29866	PTPRU	TRUE	0.610146
3.904	4.04789	3.03914	4.5008	3.69711	4.38957	3.62293	4.46989	3.45943	3.25852	3.22497	3.853	3.23266	3.75382	4.28983	3.82069	2.79077	3.85798	3.92029	4.10098	3.1635	3.65878	4.07553	3.92315	3.55949	4.17233	3.63459	5.01792	3.72247	SNRNP40	TRUE	0.128232
3.08746		2.15056		0.238787			2.58496				1.774								0.275007			0.584963		2.52857	0.948601				RIMBP2	TRUE	0.689646
		0.15056			0.650765												1.73118												COL11A1	TRUE	0.956995
2.10098	2.03914	2.63227	2.13422	1.4489	3.06005	2.7761	2.33342	1.91073	1.98185	1.70044	2.60644	1.79494	1.55582	1.93734	3.32625	1.72247	1.88753	1.73552	1.83996	3.01078	1.49057	2.48543	2.34199	2.24793	3.06005	2.55336	2.12763	1.74846	QSER1	TRUE	0.233663
4.66903	4.51538	6.0321	6.38059	5.71232	5.13627	5.50335	4.62994	5.00405	4.70874	9.58969	7.48679	8.13965	5.04002	4.62059	4.90448	5.25172	3.91743	4.774	5.87823	5.853	5.43062	4.94533	4.16912	4.97039	3.78764	6.19456	4.8748	5.1635	MPC1	TRUE	0.228438
5.04658	4.44626	4.54905	5.86146	6.67214	3.8846	5.09297	4.35403	4.95606	5.25399	5.98778	7.31433	9.45559	5.18943	4.6094	3.83693	4.72137	3.8679	5.74766	5.53201	4.85649	6.44261	4.47638	4.7939	4.71094	3.77926	4.88264	4.78031	5.0387	ACAA1	TRUE	0.227541
2.18269	2.59216	0.925999	1.38405		2.82171	0.731183		2.82985	1.27501				2.20477	1.09085	1.35614	4.24945	3.70929		0.536053			1.85599	0.176323	0.250962	3.11603		1.45418	1.24489	BCAT1	TRUE	0.631574
4.20477	4.56377	2.50335	3.14893	3.00899	4.32984	3.82069	4.26379	5.04571	5.16551	3.81865	3.07382	1.69599	5.23534	4.84549	4.76394	2.96717	4.79233	3.80426	3.69153	3.64962	2.44626	5.10182	5.09845	3.80116	3.14405	3.926	4.67073	5.08194	HDAC7	TRUE	0.237728
0.275007		1.97085			0.933573	1.36737		0.485427	1.24489				0.333424				1.9855					0.722466			3.16511	0.526069		0.0840643	LZTS1	TRUE	0.832488
					0.275007				2.64386				0.85599		0.189034		2.05311		1.18269							0.378512		2.46728	PRDM6	TRUE	0.800059
1.09761	0.263034		0.422233	1.63227			0.0143553		2.51096	1.86394						5.64443	1.58976				1.96347	0.137504		1.0072	2.41684		1.0635	2.64155	SPAG4	TRUE	0.871862
5.31796	4.25323	5.9472	5.37747	5.57289	5.67666	6.32409	5.16471	4.98823	5.03958	5.67751	6.13832	4.75489	5.17513	3.1635	5.00764	4.70598	5.32481	5.22033	5.68594	4.78241	5.51916	5.72247	4.1152	5.47119	5.26003	6.78333	4.28096	5.53823	NCKAP1	TRUE	0.136879
5.14608	4.51033	4.41278	5.95	5.58676	5.02237	4.82883	5.07553	3.90207	4.02326	5.67976	5.73118	5.6522	4.43896	4.19849	4.08576	4.25475	4.40054	4.89676	5.52325	4.44692	5.374	4.61589	3.8953	5.22651	4.6153	5.54597	4.78346	4.76341	MRPS35	FALSE	0.124527
2.84599	4.01167	4.16189	2.28096	2.18269	3.69822	3.56925	3.89336	2.28688	3.39506	4.16189	3.51854	1.852	3.30305	2.96347	1.88362	2.43029	4.67243	3.39232	3.48671		1.62761	4.04963	3.1811	2.28688	1.73985	2.12102	2.34483	3.5097	GUCY1B3	FALSE	0.285395
3.04963	3.50589	3.9486	2.69377	2.97453	3.26754	2.97636	3.26303	3.15218	3.54597	2.73118	2.15704	1.65535	3.53854	3.86888	3.92979	2.27202	3.48671	3.30451	3.03034	3.24489	3.29131	3.51979	3.86493	3.34341	3.45812	2.46728	3.20163	3.46597	SFSWAP	TRUE	0.169915
3.17951	3.82579	6.75409		2.62761	1.1635	2.53356	3.52105	2.69377	3.41414	1.72247			3.45943	4.57168	2.72247		3.15056	4.44758		4.05832	3.14078	2.31034	4.31252	2.09761	3.09761	0.584963	2.37016	3.2555	TNK2	TRUE	0.398369
3.27947	3.0993	2.84599	2.91839	2.74201	3.39369	2.90304	2.79077	3.17313	2.85		3.39369	3.11437	2.53605	3.3147	3.19219	1.91456	2.86987	2.76341	2.90497	3.20789	2.76129	3.10266	2.93168	3.43962	2.5509	3.38957	2.854	2.99095	MON2	TRUE	0.110013
	1.17632				1.82375	3.90881	0.505891		0.495695		0.713696		1.37851	2.63691	4.57228		1.66448	3.45418		0.83996		2.91839	4.16832		1.20789		3.53232	2.12763	CDH3	TRUE	0.621213
1.47508						0.505891					2.852																		ARSF	TRUE	0.731813
5.40769	5.23381	5.29646	4.91265	4.70598	5.22805	4.78712	5.57803	5.05572	4.85997	4.55888	5.26303	4.71039	5.12267	5.47671	5.57864	3.94767	5.05181	4.95513	5.32012	5.03958	4.84499	5.05615	5.11936	4.96671	6.24982	5.14119	5.42626	5.00809	GPBP1	TRUE	0.0787243
0.604071	4.10518	0.575312	3.33342	2.94111		4.0054		6.76381	1.33342	1.80323	1.1177	8.18244	1.64155	0.687061		1.70044		0.0976108	2.37295	3.88264	3.49953	1.73985	1.97085	3.47249	4.488	2.04963	3.67016	0.970854	DGAT2	TRUE	0.720358
0.176323		1.26903	0.847997	0.704872	1.08406	0.941106	2.10769		0.176323		1.04264		0.389567		1.48027		0.367371	2.20477	1.3505		0.823749	1.61824	0.0285692	1.02857	1.1635	1.58496	0.0840643	0.124328	ZNF112	TRUE	0.683472
5.75087	5.06781	5.29939	6.62615	5.85723	5.22535	5.72629	5.1643	5.60585	4.5552	7.43112	6.04658	4.03034	5.0365	4.90593	4.68818	4.49378	4.27873	5.03122	6.11458	5.08151	5.71534	5.56529	4.91504	4.87873	3.90785	5.5043	6.03342	5.11853	CS	FALSE	0.143053
			0.669027	3.15218					1.63691			0.432959					3.18269		1.39506	2.22342	3.96625		1.05658	3.22497					LTK	TRUE	0.58854
5.83112	5.06652	4.8525	5.40633	5.78215	5.1102	5.23802	5.374	4.38405	5.29536	6.46091	5.07253	5.40633	5.02591	4.45483	5.43929	5.68706	4.82273	5.4219	5.22728	6.13627	5.4446	4.70099	4.93168	4.97865	4.94064	4.80839	5.08364	4.8674	MRPS24	FALSE	0.0887429
4.0365	3.87086	4.65191	3.07382	2.63459	3.74953	4.18587	3.64616	3.29425	3.3978	3.38267	3.79909	1.848	3.78973	3.88947	3.31615	3.32481	3.45549	4.46728	3.37295	3.10769	2.58736	4.12928	4.01167	3.12928	5.02591	3.81558	3.849	3.65535	ELMO2	TRUE	0.177247
3.61706	4.03738	3.50589	3.65992	3.48156	3.70155	3.92695	3.39369	3.90014	3.21257	2.65306	3.85	3.30305	3.82782	3.99548	3.49057	2.86987	3.68818	2.8953	3.77083	2.50335	3.84398	3.78136	3.99639	3.84398	5.05224	3.91552	4.52231	3.36457	WAPL	FALSE	0.142395
5.50653	4.96347	4.33914	5.13914	5.26679	4.54102	4.61648	4.18507	5.39849	4.40531	3.68482	4.5601	5.0635	5.00944	4.03386	4.13504	3.66676	4.71973	4.74739	5.21684	4.39985	5.93593	3.99005	4.67186	4.34767	4.64847	4.38128	4.37156	4.90593	VMP1	TRUE	0.115261
3.79077	3.65535	4.0027	3.15543	2.55582	3.87873	3.69488	3.74308	3.88655	3.83996	2.03562	3.70708	2.36177	3.08236	3.80941	4.03562	2.4489	3.33914	3.45418	3.17632	2.91648	2.65535	3.83086	2.98003	3.82579	5.68566	3.99005	3.12928	3.64155	APPBP2	TRUE	0.203113
1.46467	2.90881	0.111031	2.17951	2.12763	2.74201	1.87971	1.93357	1.07039	2.44095				2.99277	2.19535	1.25096		2.72683	2.28392	0.613532	1.91839	2.73118		2.48543	2.16672	3.23726	1.98185	2.29278	2.23879	POLD1	TRUE	0.358121
		5.07895																											SEZ6	TRUE
6.3036	5.75702	5.91145	6.45138	6.39025	6.17772	5.98231	6.65764	5.75435	6.54257	5.52136	6.43446	6.01436	5.71067	6.21878	7.58526	6.13031	6.02879	5.91767	6.22593	6.25814	6.27128	6.75676	6.24394	6.1079	4.80116	6.85835	6.86617	5.9528	EIF4B	TRUE	0.0806885
	0.226509																								5.17752		0.0285692		SLC6A16	TRUE	1.61099
1.69599	1.28096	0.978196	2.33056	2.18587	2.0072	1.848	2.46205	3.0321		0.565597	1.01436	1.82375	1.48543	2.72683	2.63227		1.75275	2.09424	2.82375		2.58256	3.76553	2.50335	1.76129	1.48027	1.36737	1.57046	2.27202	GLTSCR1	FALSE	0.357426
1.53107	1.79909	1.87578	1.38405	3.81762			0.163499		1.07039	0.526069		0.765535	0.739848	1.1635	1.67807		0.782409	2.18903		2.22651	3.80219		1.61824	1.26903	1.55582				SPHK2	TRUE	0.60859
9.44501	9.48862	7.8399	10.1459	9.92676	9.89298	9.74985	10.1234	9.02931	10.007	9.02459	7.86412	8.36374	9.36155	10.4079	11.2554	10.4538	9.5796	10.0732	9.54415	10.3402	9.89686	9.71229	9.83069	9.6619	8.23644	9.36881	10.4374	9.64295	RPL18	FALSE	0.0811013
3.41414	0.815575	5.30086	0.432959	2.55582	3.25852	1.97453	2.83794	0.748461	2.48285	0.536053	1.83188		1.79494	1.94486	5.04045	1.65992		2.64616	1.16993	1.63691	1.81147	4.87676	1.70487	1.53107	1.70044	1.5509	1.61353	0.992768	CA11	TRUE	0.603436
4.30378	3.7148	3.08236	3.41007	5.21218	4.37434	3.57168	4.10936	3.24489	4.53045	4.98687	4.11187	6.04374	3.87971	3.2555	3.9364	4.34127	2.98368	4.44427	3.37712	4.9279	5.04308	3.20945	4.20555	4.05745	3.87774	2.82375	2.98368	4.20867	ISOC2	TRUE	0.19198
5.76607	6.46205	5.46303	5.48639	6.17772	5.98025	5.64414	6.04308	5.60585	5.92362	5.25134	4.5404	5.05137	5.84222	6.46809	6.2032	5.21607	5.68734	5.91958	5.16872	5.50462	6.05875	5.79597	6.36335	6.02348	6.1981	5.26003	5.78712	5.93263	U2AF2	TRUE	0.0785166
4.39025	4.04614	3.91456	3.47638	6.03562	3.48027	3.41684	3.53978	3.71918	4.15218	4.58436	2.55582	4.06005	4.33056	2.76341	4.57773	5.29389	3.99729	4.96809	3.0054	4.33628	6.04527	2.5509	4.33771	5.46467	4.45746	2.852	2.1635	3.42626	EPN1	TRUE	0.247393
4.1643	3.61471	4.51979	3.5008	3.75168	3.96809	3.60763	4.66619	3.68145	4.18428	3.90593	3.94017	3.45549	3.81762	3.88166	4.88264	3.63343	3.65878	4.13175	3.22342	4.02059	3.55213	3.97453	3.89821	3.73227	3.50462	4.18428	3.37712	4.10518	MED29	FALSE	0.0979578
									0.163499														1.59932		3.63923				AHRR	TRUE	0.969962
																									0.464668				GSC2	TRUE
5.87012	2.09424	3.85898	1.73118	1.52607	3.10936	1.52607	1.87184	2.83996	2.33342	1.18903	2.42223	2.72683	1.50589	2.91648	5.21684	2.41414	1.1177	2.58015	2.21723	1.94111	1.41684	2.84197	2.49825	2	3.05311	3.49953	2.80735	2.09085	ZNF275	TRUE	0.426673
2.73985	3.30597	3.92315	2.98914	2.79701	2.65535	4.0054	3.2765	2.04963	2.35332	2.36457	2.73985	2.22033	2.75061	3.86691	2.22959	2.19849	3.36457	2.96532	2.8953	3.19849	2.63691	2.25399	3.41549	3.02857	3.46467	3.45681	4.22033	2.90881	MTMR1	TRUE	0.19745
4.52732	2.72247	3.86295		1.70487	2.94486	3.90207	1.13093	3.76341	3.17632	6.07746		1.29866	3.53107		3.52982	3.51728	4.1811	4.72901	0.475085	3.27501	0.422233	1.36177	1.98185	1.97453	4.65076	1	0.400538	3.21412	GPC1	TRUE	0.539408
1.95606	1.04264	2.52607	1.94111	2.0072	2.05311	1.63691	1.62761	1.11103	1.63691	1.18903	1.80323	0.678072	1.25701	1.23879	1.08406		1.31034	1.9486	2.19535	1.72247	1.43829	1.81967	1.10434	1.73985	1.34483	1.58015	1	1.54597	ADCK1	TRUE	0.273566
6.2867	3.55582	4.92505	3.90593	5.2555	3.70487	4.34127	4.72137	4.42156	4.65306	6.85922	5.48993	7.61147	4.93168	3.67129	3.28836	5.13955	4.22805	4.36947	3.98823	4.47444	4.80684	4.11103	4.08066	3.79597	5.36877	5.00944	3.43029	4.01436	HAGH	TRUE	0.215829
4.25172	4.72738	4.38888	4.53169	4.45943	4.79129	4.31325	4.44294	4.61883	4.41414	3.7301	4.61176	3.66107	4.38612	4.95187	4.44758	3.61589	4.45352	4.34341	4.2502	3.91934	4.27128	4.71039	4.83441	4.4019	5.05355	4.6565	5.02724	4.47573	RNF4	FALSE	0.0822217
3.04089	4.86245		4.1035	3.76235	2.72465	2.49825	4.02591	3.62761	3.78136	0.765535	2.78031	2.82171	3.64962	4.73552	2.49057		2.71149	2.48285	3.15381	1.50589	3.854	3.16511	4.64559	3.65878	1.79909	2.15381	4.3067	3.51096	CASP8	TRUE	0.311011
5.06048	1.19535	5.48671	2.26903	1.71809	2.85997	3.18428	4.49378	5.31651	4.20085	6.01547	5.1334	3.14405	6.78228	0.613532	5.38888	2.51096	2.62994	4.74201	2.80116	5.6642	2.11103	2.9542	6.4801	2.85997	2.57531	5.14486	0.214125	4.77979	LIMCH1	TRUE	0.474099
3.64847	3.10936	3.24184	2.80529	2.56803	3.33485	3.27501	3.05137	2.34483	2.51096	2.95977	3.41278	2.43829	2.54597	3.0635	2.34483	2.17632	2.27501	2.82985	3.16027	2.6893	2.32769	2.93734	2.93546	2.8953	3.51349	3.06695	3.57531	2.95047	ASUN	FALSE	0.143204
5.18903	4.0063	4.26529	5.10894	3.89433	4.26604	5.61765	5.0045	4.73931	5.71754	3.25248	6.90063	6.18289	5.11894	4.06953	4.08916	5.43396	4.32048	4.36667	5.11395	4.6011	4.14975	4.62585	3.9542	5.11562	4.51979	4.33628	4.53543	5.478	TM7SF3	FALSE	0.162234
																	2.81352										1.0072		DLX3	TRUE	0.6686
1.95977	1.52105	2.11437	3.24336	1.53107	3.29425	2.22342	6.79766	0.748461	2.33342		3.29131		2.69822	0.378512	0.201634		1.65535	2.20789	2.81762	0.895303	0.963474	1.48543	0.555816	2.01792	6.94263	4.09255	1.79494	1.4957	SPA17	TRUE	0.72889
										3.0072			0.263034	1.03562															TSPAN32	TRUE	0.985911
2.91265			1.33342		3.72574	2.09761	0.604071	4.92884	3.80426	1.5656			4.13175		6.88496	1.43296		3.04089				3.18745			5.02857			3.56682	WISP2	FALSE	0.518201
								0.163499						0.918386											0.613532	3.39369			DMRT3	TRUE	1.13801
3.15381	1.58976	2.04614		0.275007	1.21412		3.21568	2.61824	0.790772	5.44029	3.38267	5.54813	2.06005				3.57773	1.68257	1.32769	4.393		0.678072	1.08406	1.64155		1.53107	0.782409		ST3GAL6	TRUE	0.664561
			4.18031	4.49057		1.05658	3.08066		2.29866		0.485427		2.87184					3.64501	4.38819		4.01792	0.275007		2.27798		3.12928		1.18269	ATP2C2	TRUE	0.54325
4.6893	2.852	0.124328	1.4957	0.584963	1.42761	1.33342		3.81352	3.75916	1.11103	0.432959	2.65076		1.36177		1.61824	3.18903	1.5656	1.73552	3.1375	0.163499	0.594549	4.23726		3.33914		1.13093	1.41143	NGFR	TRUE	0.673577
	1.38405	1.31615		0.367371	4.40531		2.24184	2.67807	3.26303				1.58015		5.16189				2.98368			4.57107			3.11103	4.36877		2.27798	CDON	TRUE	0.501366
3.15218	3.26754	2.65306	2.79077	2.50335	3.45418	2.92979	3.02326	2.5509	2.70044	1.7866	3	2.37573	2.47249	3.18428	2.55827	1.76553	2.88753	3.1177	3.01792	2.11437	2.52356	3.09761	2.85997	2.89918	4.02414	2.94298	3.41278	2.65306	TAF2	FALSE	0.169141
2.96901	2.41684	5.38647	2.63691	2.67356	1.70044	2.33628	3.28836	3.853	1.5008	4.40054	4.68538	2.25096	2.50589	1.58976	2.34767	2.51349	2.92029	3.32337	1.91839	3.36737	2.31904	1.58015	2.20477	4.0635	1.1375	2.22342	1.58496	1.21412	HIPK2	TRUE	0.397596
3.62293	3.852	3.67469	3.94579	3.59694	3.81044	4.08576	3.9607	3.07553	3.3147	3.37016	4.02591	3.72137	3.66448	4.15299	3.94767	2.7137	3.42492	3.56438	3.97269	3.32337	3.43563	3.95327	3.68706	3.75382	4.23802	4.19613	4.52105	3.79597	TNPO3	TRUE	0.100463
2.73769	2.76129			0.124328	0.485427	2.35332	2.27501	1.5008	2.05311	2.67582			2.27798	2.75489	2.41684	1.64155	2.0321	2.72465		0.632268	0.85599		2.774	2.20789	1.59932			1.83188	BORCS8.MEF2B	FALSE	0.419844
3.29278	4.17871	3.69488	3.50462	4.05745	4.08831	3.99639	4.67299	2.63923	4.0365	3.87086	2.14731	1.02148	4.14078	4.20633	3.79805	3.45286	4.32193	4.21956	3.13093	4.44294	3.8268	3.2854	3.97453	4.08151	3.0072	3.8339	3.81455	3.84699	RFXANK	TRUE	0.202938
3.42626	2.09085	2.3505	1.04963	3.04439	3.52857	2.7866	2.76341	1.24489	3.37295	2.83794	1.54597	2.83996	2.64616	2.92979	2.95791	3.23879	2.52356	3.73118		3.21723	2.87774	2.24489	2.26604	2.12763	1.23266	2.3978		2.93546	TMEM161A	TRUE	0.272582
0.823749	4.08576	1.80323	1.41143	1.8679	1.66448	1.94111	2.26604	2.86987	3.79597		0.0143553		2.05311	3.72574	1.64155	2.75702	2.09085	3.42895	2.22651	1.8953	2.7761		3.99367	5.17991	4.65019	0.454176	3.16993	2.37295	LPAR2	TRUE	0.501146
7.38853	5.72083	4.39025	7.13052	6.1152	4.99141	5.69572	4.67638	5.9279	6.5146	6.08831	6.98891	6.11041	6.01592	5.41886	5.28021	4.43829	6.18884	4.96209	6.49921	4.49442	6.11562	5.65134	5.69627	5.72301	4.70432	5.02901	5.39643	6.4441	CTSA	TRUE	0.140666
4.51412	4.89676	5.49985	4.17632	4.18745	4.02945	3.6837	4.44361	3.8953	3.88264	4.22728	3.67582	2.1375	4.13996	5.0054	3.95791	3.11936	3.58736	5.3427	4.92362	4.1375	4.42962	4.6241	4.89676	4.58075	6.34784	4.67469	4.80632	4.04264	SUGP2	TRUE	0.179336
3.50208	2.66903	3.94392	5.51128	5.05311	3.69599	1.9486	2.93168	2.49057	4.80219	1.76553	2.71809	0.485427	3.40871	2.0321	1.61353	1.848	1.70929	4.86443	4.79909	5.81634	5.01703	3.23113	2.12433	6.04985	3.22342	3.48929	2.26604	2.06005	SLC12A2	TRUE	0.443253
2.91456	1.3505	3.19692	4.0045	4.13996	3.89627	5.16832	4.02414	3.76871	3.65306	4.43429	4.46336	3.22805	4.33914	2.24793	1.76129	2.77189	4.55336	2.72901	3.88264	2.88166	3.7939	3.07895	2.58015	4.03386	2.54844	5.36912	3.33342	3.87283	SNX24	TRUE	0.268134
	0.495695	1.72247	3.20945		5.35826	4.1127	5.39335	3.926	1.58976		2.02148						2.52356	3.91839	1.32769	4.36597		1.9486		3.43962	2.97453	2.35332	2.50843	2.26604	EYA2	TRUE	0.459558
4.24413	6.95594	2.61353	4.47703	4.34056	6.06329	5.85748	4.39985	6.35103	6.4002	4.71315	3.81558	3.30597	6.19928	7.16651	6.98539	4.60407	5.14241	5.63546	4.34908	5.69404	3.65191	5.4138	6.71781	4.53854	3.67129	4.76818	6.87098	6.41058	CNN2	TRUE	0.239625
1.73118	2.63459		0.650765	0.879706		1.29278		2.62527	2.97453	1.30451			1.83996	4.46271			0.111031	1.67356	0.367371	1.87971	1.26903		3.75809	1.23879			2.88166	1.9486	ABCA7	TRUE	0.604356
	0.250962	4.21179			4.29866		2.24793	1.45418	2.18903		0.111031			2.15381	4.67525		1.73552	1.55582				4.99277	1.38405				0.485427	3.16993	SNCAIP	FALSE	0.689216
1.57046	2.53854	1.22651	2.21723	1.42761	2.35896	1.92979	2.35896	2.14405	1.41143	1.51602	2.22033	1.25701	2.15381	2.79077	2.17951		1.81558	1.82782	2.26003	1.34483	1.53107	2.33342	2.51096	1.37295	5.21412	2.28392	2.66221	1.72683	DDX20	TRUE	0.36921
4.4522	4.62293	5.14445	4.92695	4.65707	4.76341	4.60051	5.32048	4.63343	4.32048	6.0751	4.95838	4.16993	4.41549	4.76818	4.20085	3.30159	4.39917	4.37016	4.94064	3.68706	4.66334	4.40871	4.37016	4.43763	5.43363	5.22149	4.916	4.66619	BTBD1	TRUE	0.112974
2.02148	2.75916	1.83188	5.05832	3.58736	1.58015	2.01792		2.13422	1.38957		1.13093	0.83996	2.72028	0.823749			3.15218	0.0840643	3.81865		3.11103	2.79286	2.488	0.847997	1.43296	0.411426	0.687061	2.76341	FAR2	TRUE	0.588314
	0.176323	5.57168	5.27798	3.66448	1.09761	2.17951			3.08236		0.970854							5.13422	5.142		3.69377	2.43029		7.46205			1.72247	3.74846	BCAS1	FALSE	0.594487
	7.63771		2.27798					2.96717	2.27202	2.14731			3.96347	5.46074			3.48414			6.46761	0.176323		2.82375		0.678072	2.86987	7.25058	5.52669	CHI3L2	TRUE	0.608764
2.68482	4.85599	0.807355	0.321928	2.67807	1.90304	2.33342	1.52105	4.12681	3.22651	0.545968			3.09255	3.30451	2.4957	3.22651	3.10769	3.03034	0.389567	3.30159	2.87578	0.15056	3.65191	2.57531	2.82782	1.1375	1.81558	2.74416	SBNO2	TRUE	0.504491
2.68032	2.91648	2.43829	2.17632	1.5008	2.83188	1.70487	2.7761	2.31325	1.97085	1.52607	2.04614	0.659925	2.08746	2.80529	2.56316		2.06695	2.92029	2.73335	2.0036	1.91456	2.97085	2.61824	2.24793	4.91169	2.65535	2.28983	2.65535	PMS1	TRUE	0.302554
3.75809	3.41819	2.78869	3.26754	4.43696	4.67638	4.12598	4.02591	3.42626	4.28836	3.49313	2.33056	3.06867	4.18587	3.45681	3.89142	3.68594	4.23649	5.72846	2.97453	4.84449	4.29352	3.60288	3.58736	4.01257	3.76553	2.76129	3.03914	3.96347	HMG20B	TRUE	0.187499
1.80323	3.23879	5.19456	2.81762	0.545968	4.69042	3.38819	1.7137	6.1983	4.17313	3.97911	4.17712	3.26454	5.89724	3.1127	3.73335		3.12102	2.76553	3.46205	2.49825	1.26303	4.42626	1.87578	2.72683	1.72247	5.16872	2.52356	4.54782	CALCRL	TRUE	0.414356
3.78136	4.18031	4.09761	4.337	3.83491	4.13093	3.99186	3.70044	3.96717	3.83289	4.01792	3.29278	3.80219	4.13668	3.9982	3.64731	3.04789	4.22265	3.70377	4.31034	3.48285	3.58376	4.14323	4.08661	3.81558	4.8748	4.07039	4.38474	3.88557	TAF11	TRUE	0.0900504
3.38267	2.73118	2.54102	2.62761	3.09255	2.79909	3.7939	4.33056	3.1127	3.31325	2.8953	2.82985	2.16672	3.80426	2.72028	3.40463	2.46728	4.66903	2.75489	3.27202	2.45418	2.68032	2.848	3.53107	2.93546	4.04002	2.30159	1.774	3.97177	ANKS1A	TRUE	0.21718
4.79494	4.84248	4.77716	3.84599	4.41007	4.38681	4.56682	4.29278	3.75061	4.15785	4.05311	3.93168	3.11437	4.50843	4.49953	4.49761	4.87676	4.59932	4.27128	3.51602	4.87922	4.61706	4.21023	4.61706	4.64962	5.34127	5.27165	3.99729	4.8535	AP3D1	FALSE	0.11183
4.04177	3.58616	3.63343	2.90304	3.37573	3.16027	2.93168	3.88947	2.85798	3.71699	4.07639	2.57773	2.852	3.05832	4.07382	3.54226	3.20006	3.28244	4.04963	3.45681	3.20477	2.7761	3.81762	4.29205	3.44493	3.77189	3.91073	3.61117	3.34341	ZNF76	TRUE	0.132462
4.64962	3.50843	3.28983	1.83996	3.93074	5.40905	3.42089	4.3067	5.02503	5.47054	6.42139	3.02503	6.11873	6.67694	2.97085	4.9364	2.92979	5.64039	6.38284	1.82782	6.75902	3.89239	3.79805	5.88972	5.64472	3.31615	2.36457	0.555816	5.00675	SLC9A3R2	TRUE	0.375256
2.28983	1.31034	2.38681	1.78241	2.38957	2.51602	1.40054	3.35191	1.12433	3.14568	2.53605	0.400538	2.88753	2.80529	1.83996	3.29425	1.85997	2.28983	3.0197	1.33914	3.16993	2.70044	2.08406	3.11103	2.852	2.10434		0.879706	2.25096	NTHL1	TRUE	0.345162
1.85599	1.63227	1.83188	1.50589	1.26303	1.4957	1.22033	1.10434	0.948601	1.08406	1.71809	1.81147	0.863938	1.60407	1.59932	0.903038	2.23266	1.95977	1.47508	1.65992	2.23573	1.33342	1.67807	1.28688	1.51096	2.86394	2.81147	1.97453	0.963474	UHRF1BP1	TRUE	0.316015
1.37295	2.16993	0.722466	1.86394	1.49057	2.23266	2.63459	1.28096	2.1177	1.46989		1.59932	1.43296	1.61824	1.53605	1.25701		1.89142	1.46467	1.69153	0.807355	1.38405	1.51096	1.45418	1.30451	1.77821	1.30451	2.15704	1.79077	GNAI3	TRUE	0.262149
4.76288	5.01391	5.1639	5.2854	4.53232	5.35755	5.29168	5.29829	5.12019	4.50208	5.32589	5.35014	4.49249	4.69766	4.71973	5.72547	5.10266	4.60999	4.52042	5.13299	4.71973	4.3799	5.36527	4.48478	4.69933	6.89688	5.97499	5.48896	5.10894	IPO5	TRUE	0.10626
6.62147	5.06781	6.05745	5.85225	9.20611	6.644	6.43829	4.55582	5.4363	5.65621	4.91886	6.43962	8.05066	5.26529	4.61058	5.72	4.63981	5.55275	5.60259	6.04023	7.15765	9.21177	6.09022	4.75596	5.58075	5.75729	5.4219	5.68342	5.92861	OAT	TRUE	0.196486
2.5008	2.95047	1.95977	3.04963	2.12763	2.69153	2.4957	3.04089	3.26303	1.51602	0.933573	2.65535	2.90881	2.0635	2.57289	2.22959		2.16993	2.10769	2.35614	1.15056	1.81967	2.92029	2.25096	2.33914	3.24793	2.64155	3.26454	1.1375	WDR3	TRUE	0.270636
4.03738	3.43696	2.81147	3.70377	4.38888	4.09001	4.07639	3.53356	3.2032	3.30012	2.95606	3.84197	3.20006	3.82375	3.44626	4.32841	2.67356	3.9222	3.76341	4.11103	3.09085	4.41143	3.78973	3.41684	3.95606	3.22342	3.99277	2.96717	3.70487	PKN2	TRUE	0.132596
2.45943	3.09761	2.76553	1.55582	2.99639	2.72028	2.0321	2.54844	1.59455	2.19849	2.69153	0.978196	2.15381	3.10769	2.46467	2.39232	2.53356	3.23573	3.45681	0.956057	2.70708	3.20789	1.33914	2.40054	2.40871	2.57773	1.79077	0.713696	2.34199	WDR18	FALSE	0.306193
1.95977	3.68706	1.05658	3.4489	3.43029	3.06867	2.72465	2.0321	4.12019	4.01614	2.26303	2.28096	1.97085	3.25701	2.65764	3.41549	2.20163	4.96901	2.24793	3.52231	1.60407	3.33628	3.74524	3.51223	3.1635	3.46597	2.38681	3.7137	3.86196	TRAM2	TRUE	0.292377
	1.34483	3.42089	1.37851	2.73552	2.46205	4.20163	3.853		3.22497	1.05658		0.464668	1.38957				1.09761	0.925999	1.71809	2.07724	1.96717	1.04264		2.0036	0.555816			2.04614	NTN1	TRUE	0.552239
			2.10769	2.82579				0.432959	3.50335										2.79494		3.07382	0.0703893						2.6893	GLP2R	TRUE	0.576031
	1.34483		1.17632											0.505891											1.4489		1.80323		MCM10	FALSE	0.380547
1.20789	4.66959	2.19219	4.83946	4.94486	2.14731	5.06781	1.38405	4.2854	3.67469		1.31034		1.98914	6.15866	1.29278	1.66903	3.65764	2.58736	4.5097	3.91073	5.21956	3.51728	4.76447	2.26604	1.57531		6.09043	3.93452	DGKA	TRUE	0.462784
0.475085	0.847997	3.95513	6.03936	6.05593	1.86394	4.38819	3.69265		5.02326		5.04571	4.70819	4.10685			4.0063	3.34056	5.37643	5.85025	5.70238	6.07296	2.43829		6.28596	0.137504		3.27202	2.67807	ERBB3	TRUE	0.467902
																				1.4489					6.13463				ROPN1	TRUE	0.873818
2.21101	4.23036	2.45154	2.38681	1.38957	2.39506	1.02857	0.650765	2.60881	2.37851	0.594549	1.29278	1.23879	3.08066	5.21723	1.19535		2.15056	1.28096	2.39506	1.37851	1.81147	2.51349	4.06178	2.02148	0.695994	0.765535	4.36317	2.45154	ANKRD44	TRUE	0.554341
5.26978	6.12329	5.22805	6.45664	5.69794	5.73904	5.83137	6.12743	5.35544	5.64933	6.30067	6.03936	5.71232	5.51065	5.8824	5.66078	5.54628	5.55029	5.4522	6.08958	5.83289	5.81839	5.70072	5.51916	5.29389	6.12557	5.77558	6.57456	5.85898	KARS	FALSE	0.0592882
3.31904	4.5008	3.93263	4.0072	3.84398	3.65191	3.43429	4.40939	2.8953	3.38543	2.7866	4.46009	3.21878	3.62994	4.37782	2.64616	1.70487	3.50208	3.95513	3.99005	2.66676	3.17153	3.76447	4.35685	3.7137	4.07895	3.83188	4.20006	4.27128	ADAT1	TRUE	0.180334
4.20242	3.62877		4.04876	3.27798	4.06091	2.80323	3.40735	3.17632	4.17712	1.81967	3.21568	5.97292	4.19692	2.90304	3.2765	3.48414	5.51696	5.7046	3.69488	3.1375	3.05832	2.93546	2.81762	4.8334	4.15866	4.57531	3.21101	4.15137	PDIA5	TRUE	0.250959
2.9279	1.96347	1.926	2.72465	2.63691	2.09085	2.69822	2.9855	1.78241	2.33914	1.63227	2.69599	0.545968	2.27798	1.95606	2.28392	2.73118	2.21412	1.95233	2.64155	2.8339	2.5509	2.36457	2.08406	2.06005	3.45418	2.58015	2.57046	2.27202	TBC1D22B	TRUE	0.228895
7.55528	5.92267	5.80478	6.73809	6.44973	6.13791	7.41515	6.22997	5.67864	6.83099	8.66107	6.26903	6.4522	6.46989	5.23496	5.848	5.68986	5.54905	6.25058	6.38301	6.17413	6.51854	6.04243	5.59634	5.75942	5.6985	6.36457	6.07339	6.66149	NDUFB4	FALSE	0.110344
2.56803	3.23266	3.13422	3.01614	2.69377	3.0072	2.85	3.44228	3.28836	2.58015	1.89918	3.69599	1.94486	2.67582	3.64731	4.12598	3.20789	3.21257	2.82782	2.86196	3.18745	2.88557	3.45812	3.48156	2.98732	2.98003	3	3.14078	2.39506	SPEN	TRUE	0.159066
5.14731	6.75649	4.34341	5.77795	7.09614	9.83722	8.93402	5.33914	5.08534	7.9002	3.25248	5.87234	5.37504	5.59604	4.91121	6.1467	1.98185	5.7137	8.59152	9.63583	6.54381	4.28096	9.47281	6.40378	5.10518	6.20867	3.82782	3.44758	9.50549	MYLK	TRUE	0.334661
5.11603	5.06307	4.96162	4.774	5.24869	5.10601	5.07168	4.7148	4.89869	4.48864	4.59216	5.07895	4.68313	4.67299	5.1035	4.44029	4.79338	4.94767	4.78503	5.13955	5.00764	5.0505	4.65076	4.72846	4.83441	5.31578	5.42761	5.24108	4.89772	ZC3H15	FALSE	0.0504877
3.60526	3.12267	4.16027	3.41143	2.78241	3.59455	3.96993	3.26903	3.22959	2.95606	3.27202	3.7148	3.28688	3.10098	3.16832	3.18745	2.61117	3.37573	3.47508	3.51223	2.5435	2.95233	3.42089	3.18903	3.32481	3.66334	3.7866	3.48671	3.12267	MAP2K4	TRUE	0.110166
1.08406	0.978196	3.69265	0.422233	0.238787	1.61353	0.367371		0.536053	1.10434		2.76553		1.25701	2.21412			1.69153	2.0321	0.250962		0.799087	0.137504	1.91073		2.88753	0.505891	1.30451	1.38405	TMEM206	FALSE	0.721986
2.64386		5.37504												0.176323				1.45418							3.40327				SNAP91	TRUE	0.754902
3.80116	3.70819	3.1635	3.65535	3.28392	4.18824	5.6427	3.1375	3.99095	3.59694	4.16672	4.08066	3.03034	4.30451	3.22033	4.15866	3.40599	4.17153	3.72247	4.24793	2.97636	3.47897	4.16832	3.67807	3.96162	4.22342	4.40327	3.67582	3.96625	SLK	TRUE	0.141956
1.95233	3.70929	1.43829	2.1635	2.52356	1.87578	2.16027	0.389567	2.62527	1.69153	1.95233	1.01436	0.963474	1.85997	2.92029	1.07039	1.71809	1.50589	1.51602	1.70929	1.01436	2.72683	0.748461	2.70708	2.73335	3.23573	0.918386	2.52105	2.32769	CYB5R4	TRUE	0.41841
	0.367371		4.7301	3.63575		5.05875											6.29057	3.06178	4.16912	3.92979	4.2149	0.83996		4.2426	1.83996		3.76977	2.15056	COL17A1	TRUE	0.476538
			2.854	2.15056	1.15704	1.51602	3.22651		0.948601		2.70044	1.27501			1.77821	2.26604		2.74201	2.22033	1.848	2.0635	1.9222		3.03386	3.07211	2.3505		0.15056	GSTO2	TRUE	0.390871
1.9486	1.83996	4.19849	0.321928		2.28096	1.31615	1.12433		1.15704	2.07039		1.926		2.17313	0.344828		0.137504	1.41684	1.29278	0.594549		2.97453	1.98914	0.321928	3.9855	1.90304	0	1.88753	SEC61A2	TRUE	0.686534
	2.16672	1.69599	0.0565835	0.0976108	1.86394		2.26604		0.0285692		2.88166		2.03914	3.28244							1.04264		1.70487			2.4489	2.55827	0.31034	PRKCQ	TRUE	0.660705
3.39917	0.443607	2.35896	1.83996	2.64616	3.14078	2.28688	2.19535	2.56071	3.53107	3.46205	0.815575		3.88947	1.41143	2.81967	3.76977	2.85997	3.93546	2.41143	5.63285	2.47508	2.96901	3.49825	2.70929	2.93168	2.48543		3.36737	TLE2	TRUE	0.365142
2.21723	2.76129	3.55213	1.87578	2.1375	2.90304	2.14731	1.79494	1.95233	2.5656	3.39506	1.99639		2.88753	2.53854	2.92979	1.38405	1.71809	2.0036	2.26003	1.1375	1.53605	2.90497	2.33914	2.03562	3.20945	1.94486	2.40871	2.37851	ASB1	TRUE	0.256104
5.50144	6.43496	5.48864	5.88923	4.63459	4.56316	4.37016	4.11686	5.4446	5.35685	2.35896	6.9197	6.07895	5.6837	6.38578	2.07382	5.09719	4.0036	4.59156	4.22959	5.38336	4.93357	5.10434	5.1811	6.0974	5.15137	1.36737	6.55013	4.7866	FAM107B	TRUE	0.260538
5.19101	1.65992	2.44626	2.38681	3.93923	2.27798	4.74093	1.83188	4.34412	3.51602	2.94673	1.81967	2.46205	2.73118	1.62293	3.08576		1.58496	1.926	2.86592	2.72901	3.84699	2.43296	2.31325	4.55888	4.33985	2.27501	2.0635	3.52105	ME1	TRUE	0.357695
2.62994	4.75061	1.79077	4.10434	4.46009	5.93145	4.5735	5.89918	4.45022	5.22033	5.12887	5.86987	4.55275	4.24336	4.8495	3.75809	1.64616	4.96255	3.53605	5.36807	3.97085	4.07724	6.40224	4.77294	3.42358	5.17073	5.80038	4.84649	5.42257	TBC1D1	TRUE	0.25338
3.27501	3.61235	3.23573	3.15218	2.83996	3.5008	3.42761	3.57894	2.98185	2.9241	1.8679	3.58376	2.99095	3.07382	3.91361	3.72901	1.38957	3.29131	3.05832	3.35473	2.73552	3.10769	3.49313	3.41278	3.42358	4.34341	3.9279	3.77821	3.41954	CDK13	TRUE	0.17751
2.56071	5.5373	5.05832	4.72083	4.01436	3.83895	4.37226	3.33199	5.36457	4.14975	3.57531	3.04264	1.28096	3.30012	4.55704	2.14405	5.57561	3.67356	4.04002	4.41075	3.22959	3.30012	4.37295	3.39917	3.81147	4.30232	5.7447	5.56407	4.5509	MTHFD2	TRUE	0.263481
2.22342	1.22033	2.62059					0.83996		0.0840643		1.51602	0.475085		2.18903	1.91839			2.10769		1.852			1.75275	2.50335	0.0426443	1.9486	2.20163		SLC9A7	TRUE	0.518506
2.40054	2.65306	2.79701	2.61353	2.4489	3.54226	2.70266	2.58256	2.90689	2.9782	2.97453	2.45681	1.65535	2.4957	2.88947	3.5656	2.04614	2.79286	2.66903	2.89142	2.35896	2.24184	3.7845	3.09424	2.92979	3.07724	2.61824	2.57531	2.88557	FOXJ2	TRUE	0.159795
6.32643	7.2589	5.5292	7.16742	6.85337	6.66263	7.09064	6.01279	6.78031	6.22805	7.72601	5.54535	5.68482	7.00011	6.30725	6.11582	5.69265	6.25437	6.36894	7.09677	5.97154	6.93911	6.67723	6.63851	6.07959	7.98214	6.4949	6.93286	6.64746	YBX1	TRUE	0.0934538
1.51602	2.25096	2.73335	1.35614	0.263034	2.74416	1.28688	2.16027	3.08236	2.71589	1.35614	1.25096		3.04264	0.669027		2.48285	2.22651	2.20163	1.81967	2.51096	0.925999	2.17632	2.11103	2.73335	2.22959		0.575312	2.63459	PDE4A	TRUE	0.403267
3.37156	4.15137	5.10685	4.9644	4.45088	4.0063	5.47671	3.87283	4.81711	4.59395	4.9397	4.94392	4.61883	5.82146	4.69098	3.54597	4.27798	4.92125	3.99458	5.04614	4.91552	4.72683	4.36177	5.07039	5.06867	3.59096	5.68032	4.77716	4.8953	PPP2R5A	TRUE	0.130552
2.13422		4.89142			1.58015																			1.32769	3.52857				CTNNA2	TRUE	0.555447
4.55766	4.9397	4.1375	4.61176	4.33342	4.98003	4.68201	4.93121	4.28836	4.25475	4.30816	4.38267	4.24793	4.57228	4.61353	4.68257	3.76871	4.58075	4.57592	4.51286	4.48091	4.09255	4.50144	4.60881	4.20006	5.08236	4.55888	5.05441	4.63459	ELAVL1	TRUE	0.0667961
2.02503	2.67807	1.92979	1.49057	1.65992	2.84398	1.99639	1.57046	4.03298	4.03034	3.62293	1.92979	2.18269	4.47444	2.8953	1.66903		5.41853	2.20789	1.30451	1.32193	1.42761	3.52857	3.69042	0.85599	0.739848	2.40054	0.422233	3.79494	TIE1	TRUE	0.508761
3.24336	2.93357	4.15785	3.36177	2.28096	2.54844	3.62059	1.55582	2.25701	2.71589	2.16672	2.76341	2.54844	2.23573	3.20477	2.8679	2.0635	3	2.4957	3.09255	2.09424	2.34483	2.58015	3.3505	3.0054	3.28244	3.65992	3.11936	2.33628	DIP2B	TRUE	0.20693
4.04177	4.41684	4.80839	4.93404	4.14568	4.47768	3.71809	4.53854	4.42492	3.98094	3.11103	4.78293	2.69822	4.36317	4.72028	4.02148	3.12763	4.17871	3.93923	4.47444	3.60999	4.44956	4.78031	4.46858	3.90304	4.66448	4.14649	5.42156	4.2149	SMARCD1	TRUE	0.137887
3.92125	3.19535	2.98185	4.08236	4.39643	3.88166	3.11603	4.01614	2.75702	3.58616	2.40599	3.36737	3.44758	3.50335	3.40327	3.83491	2.73118	3.04264	3.51349	3.79286	3.09761	4.50843	3.64039	3.38819	3.88557	2.60644	3.90593	3.61353	3.56438	KDM4A	TRUE	0.146957
4.23649	4.44029	3.76765	4.9364	4.59096	4.853	4.68482	4.59991	3.926	4.45812	5.31216	4.50526	4.01881	4.36527	4.88264	5.09085	4.23802	4.52168	4.61294	4.64731	5.04177	4.40803	4.91886	4.64212	4.49249	4.31759	4.8885	5.15987	5.02989	NFYC	TRUE	0.0808706
0.632268					2.21412		4.79442	0.214125	0.903038		3.19219	1.71809	1.98185		1.70487			0.831877	0.124328					0.400538	3.65535	2.6017			ZMYND12	TRUE	0.78672
	1.4957		5.49217	4.73606		0.831877			4.68482		5.01302							4.07553			5.50239	1.07724		3.98003					SLC9A3	TRUE	0.498301
4.99774		5.01614	2.8679	4.68426	1.8953	0.137504			1.45943		1.64616	2.72901			0.475085			0.400538	2.73552		4.71973	2.12102		3.51223	0.0976108				NGEF	TRUE	0.707126
	1.51602		1.34483	0.687061		0.641546								0.879706			0.0703893				0.189034			0.176323	1.89142		2.4957		ASPM	TRUE	0.815509
1.93734	3.87676	0.815575	1.64155	0.933573		0.765535		2.49313	1.74846				1.3505	4.40871			1.83188				1.22651	0.632268	3.46205	1.33342	1.04963		3.09592	1.63227	CD84	TRUE	0.589831
4.46597	5.06781	5.2854	5.81327	5.32841	5.0387	6.09276	4.86493	5.11603	5.41075	4.24641	4.9279	4.42694	5.6605	4.82273	4.23802	4.41549	5.39438	5.50716	4.97499	4.63517	5.20828	4.916	4.94205	5.59425	3.45812	5.5601	5.31288	5.0993	ELOVL1	TRUE	0.109937
3.99277	6.37069	1.66448	1.62293	3.96347	1.89918	2.57531	1.20163	5.55766	3.87283	1.73552		1.52105	6.09381	4.84197	1.91456	1.88362	4.44824	1.92979	0.713696	2.1177	3.79181	1.74846	6.02104	2.68257	1.37295		3.76765	4.24641	SPI1	TRUE	0.542512
3.75596	4.32121	2.85599	4.63227	4.13011	4.13504	3.66107	4.04002	4.24641	4.33842	3.84499	3.30012	3.59694	3.82477	4.41143	3.79286	3.4019	2.852	3.65764	4.26228	3.46989	4.12763	3.97085	4.0268	4.06005	3.97177	3.15218	4.86196	3.75061	ZNRD1	FALSE	0.123027
1.72247		1.73985			3.14241		4.24413	1.61824		2.10098	3.91456							3.50716	0.475085	3.34908		2.62059	0.765535	0.31034	0.879706	3.38957		1.93357	MPPED2	TRUE	0.564531
				0.0840643					1.90689				7.4176											9.05989					CLDN18	TRUE	0.931359
2.53605	3.22188	2.75275	2.15704	2.55582	2.76977	2.54102	2.49313	2.46205	2.26003	1.68257	2.59455	2.24184	2.49825	3.49313	2.80116	2.37851	2.47249	2.57531	2.44361	2.22651	2.41684	2.848	2.98185	2.49313	3.38681	2.81558	3.04264	2.59932	ZBTB11	TRUE	0.143785
2.39506	3.10434	2.15056	2.1177	1.33914	3.25852	3.94298	2.81967	2.94486	2.78241	2.26003	2.67129	2.70266	1.96347	3.29278	2.26003		2.97453	3.00899	2.91073	1.64616	1.64155	3.19849	2.34483	2.80941	4.08916	2.76341	3.15218	3.59335	ATXN3	TRUE	0.242373
4.13996	4.08066	3.80219	4.55949	4.08321	4.45483	4.2891	4.28096	3.68594	4.06091	3.7148	4.33914	4.50779	4.15381	3.56682	3.86096	3.78973	4.53169	4.71918	4.47703	4.33628	4.02945	4.33199	3.6893	4.82171	5.24222	4.84197	4.24336	4.33342	GOLGA5	FALSE	0.0930359
4.11103	2.45154	4.75007	4.15218	2.43563	4.75061	3.8885	4.41819		4.40259		4.58376	3.73335	4.31615		3.73335	3.21257	3.45812	2.74416	4.02237	4.86592	1.61824	5.77294		4.42761	2.9222	4.37851	2.17632	2.95791	FGFR2	TRUE	0.262874
2.8953	3.05311	3.07382	3.09085	3.48671	3.59813	3.08916	2.21101	2.84197	2.59455	3.07553	3.55213	3.74631	2.76341	2.98185	2.5008	1.79077	3.15218	2.91839	3.08066	1.95606	3.31904	2.926	2.76341	2.58736	3.72465	2.65764	3.33199	2.93734	LRRC40	TRUE	0.159683
4.53916	3.50208	2.90497	4.05137	4.60526	7.25531	4.06953	4.97223	3.68257	3.26153	5.35332	4.7241	5.87848	3.92125	3.10936	3.44361	3.32912	3.92029	4.40531	4.31687	4.1102	4.50398	5.66164	2.85599	3.90689	3.49313	3.58976	3.60051	3.82985	ISOC1	TRUE	0.232134
2.53605	2.79701	2.88166	2.12763	1.75275	3.93357	5.05615	3.86592	3.10434	4.16269	2.7845	3.34483	1.19535	3.79701	0.782409	1.13093		4.3512	2.75489	4.59813	0.887525	1.45418	4.4019	1.87184	2.88947	2.62527	3.43162	1.73118	4.81558	EML1	TRUE	0.429428
2.99639	2.98003	3.5656	3.08746	3.78973	3.49697	3.02148	3.18587	2.27798	3.33628	3.30889	3.38267	3.02857	2.93734	3.47249	2.88362	2.01078	2.53605	3.39369	3.32625	2.24489	3.74308	4.03826	2.73118	2.99095	3.47249	4.38198	3.30159	2.49313	TRMT11	FALSE	0.168376
3.93168	3.7866	4.14731	4.16511	3.63227	4.849	3.96717	4.73173	3.76235	3.9982	3.13914	4.45022	3.28392	3.97545	4.37365	4.23955	3.38128	3.91934	5.07596	4.5373	3.99005	3.5509	5.05961	4.16832	4.19692	4.63981	3.83996	4.31615	3.854	THUMPD1	FALSE	0.119097
2.60881	3.25399	3.29278	2.46467	2.56071	3.39643	3.22342	2.3978	2.55827	3.24184	3.79701	2.30743	1.7866	3.13914	2.25399	2.81352	2.12433	3.48027	2.76765	2.85	2.52857	1.81967	3.21101	2.31904	2.85	3.0018	3.72465	2.98185	3.79181	MSANTD3	FALSE	0.193483
0.400538													0.0840643				0.604071						0.731183						KIF26A	TRUE	0.620461
1.81558	1.7866	1.98914	1.848	1.78241	2.06005	1.64155	1.68257	1.58015	1.69599	1.4957	2.40054	1.8953	1.63691	2.0072	2.19849	2.49057	1.39506	2.11103	2.09761	1.12433	1.8679	2.21101	2.20163	1.85997	2.65764	2.45681	1.72247	1.32769	ATG2B	TRUE	0.189822
3.32912	3.55213	2.89336	3.7866	3.92979	3.35896	3.62877	3.55949	2.95047	3.35614	2.52105	4.45878	2.87381	3.22033	3.7301	2.88753	2.90111	3.58976	3.20633	3.70929	3.26153	3.73227	3.06178	3.29425	4.07553	4.75596	4.68594	3.54597	3.18428	ARFGEF1	TRUE	0.153961
											8.33838	8.02746																	ACSM2B	TRUE	0.026867
	1.44361	0.0143553		0.0426443	0.887525	0.0976108	0.201634		0.0143553		3.32481		0.214125	1.63227	1.1635		4.50589		0.823749			1.41143	1.08406	0.124328	1.87578	0.356144	0.555816	0.918386	ZFAT	TRUE	1.12187
3.62644	2.15381	1.54102	3.07039	3.22959	3.16027	3.14241	2.96717	1.9782	2.10769	2.97085	4.35403	4.31179	2.8679	2.25701	2.23879	2.04264	2.29278	2.81558	3.05485	3.10434	3.58736	2.83592	1.45943	3.41143	3.53978	3.59455	2.5509	2.95791	MTFR1	TRUE	0.251809
0.422233	0.731183	2.67356	0.0285692				3.97269		0.298658					0.704872	1.35614	1.45943	0.163499	0.432959	0.356144	1.29866	0.15056	1.16993		0.594549	5.3579		2.13422		STAG3	TRUE	1.10912
3.81044	2.24184	3.58976	3.24945	3.07211	3.848	3.6017	3.0321	3.03738	2.61117	4.15866	4.88947	4.35191	2.98914	2.8679	2.75702		3.39917	4.22882	3.18745	3.35614	3.02326	3.31904	2.80529	2.43829	2.66448	3.64501	3.23113	3.23879	FECH	FALSE	0.183521
1.29278	2.06695	2.52105	1.50589	0.333424	3.13914	2.89724	2.01792	2.10434	2.15704	1.21412	4.04264	0.659925	2.51349	2.40327	3.18587		2.77189	2.27501	2.51096	0.669027	0.505891	2.58496	1.9855	1.69153	3.53854	2.73118	1.89142	1.99277	MYO9A	TRUE	0.429577
	5.22843		3.89336			4.37086			4.46336								4.40735	4.67751	4.84398		4.43496			4.21335	5.97957		4.7137	4.6893	DDX3Y	TRUE	0.11441
3.00899	4.7666	5.69822	4.42761	5.08108	4.6427	5.69961	3.53605	4.48027	4.38543	7.10381	4.7845		3.58856	4.3978	3.09085	2.7845	3.85499	4.8212	4.84398	3.55213	5.12019	4.30816	3.95047	4.59753	6.52982	4.10434	4.42021	5.33949	PFKP	TRUE	0.217867
6.30579	5.58736	5.81352	5.81275	4.60407	4.28688	4.89239	3.41143	5.35332	3.75489	4.41549	4.85649	6.12039	5.25399	4.74631	3.07553	4.19928	4.28762	5.75409	4.73606	3.8679	4.46009	3.81044	4.27053	5.13668	4.5472	4.16511	5.49921	4.05572	IDI1	TRUE	0.173829
5.4545	6.0881	0.454176	4.89336	5.29425	4.85898	4.91265	5.18824	5.24298	5.7339	5.72819	4.83693	5.03166	5.53699	6.45927	5.18943	3.86196	5.67271	4.82477	4.98413	6.27146	5.42895	5.1639	6.01212	5.35579	2.74846	4.79857	6.2267	5.51854	SP100	TRUE	0.226207
5.79233	6.81109	3.70929	6.19967	5.64818	6.22978	6.75462	4.29057	8.06469	6.06178	4.50526	4.7301	4.98003	6.11562	6.03034	4.62527	5.59485	6.33949	3.97361	6.90557	4.38612	5.79753	6.40429	5.58496	6.29278	4.15785	5.56438	5.07852	6.87958	KLF6	TRUE	0.184799
5.46565	4.82528	3.852	5.90231	5.2075	6.47476	5.58316	3.34625	7.21306	7.08799	6.21781	6.19535	5.39883	4.60999	3.83693	3.69711	4.18269	5.19692	7.79656	5.97842	3.46728	5.16872	5.93003	4.35614	4.70155	3.9279	5.69237	3.89336	6.89978	PLPP1	TRUE	0.231147
3.03034	2.52857	4.7126	5.35861	4.54164	4.21412	3.33199	3.93452	2.81147	3.58736	1.25701	4.91025	2.16672	3.70819	2.1375	4.23343	3.10434		4.64501	5.41886	3.99277	4.32625	4.47962	2.59455	4.41007	4.08491	3.91934	2.29278	3.37156	NEO1	TRUE	0.2832
6.49953	6.70722	5.01123	6.16792	6.29737	6.8936	6.08746	6.4733	6.16007	6.42928	5.4822	6.78738	7.03441	7.27081	6.44874	6.02259	6.60733	7.10633	6.3361	6.06523	7.5452	6.47362	6.06221	6.24165	6.38336	6.13689	7.66952	6.69544	6.72819	TRAM1	TRUE	0.0856696
2.99277		1.79494	0.565597		0.263034	1.37851	0.85599		0.678072	2.55827	1.12433		0.238787		2.26604		0	2.1635	0.933573	1.5656		0.722466	0.111031	0.704872	0.604071	2.65535		0.367371	PHKA1	TRUE	0.778548
6.05072	6.16551	3.82273	5.91121	6.18051	5.63575	5.98618	5.28355	7.16621	6.32229	3.9644	4.97039	5.89069	6.02237	5.13955	5.43329	4.73281	6.04723	5.02547	5.62469	4.43095	6.19338	6.01235	5.60526	5.23611	4.31832	4.72028	4.60822	6.4187	TNFRSF1A	TRUE	0.145789
1.19535	0.0976108	3.11437	0.263034		0.124328		0.411426		1.04264	1.89142			1.53107	0.678072	0.659925			0.389567	0.594549			1.58015	0.895303	0.163499	0.925999	1.5008		0.454176	CACNB1	TRUE	0.820641
2.45418	1.64155	1.90689	1.58015	1.74416	2.31615	1.79077	1.95233	1.9855	1.62293	1.50589	2.10434	2.37851	1.87971	0.356144	1.0635		2.75916	1.81147	2.26003	1.0072	1.63227	2.13093	1.31615	2.46467	2.96901	2.24489	0.992768	1.40599	EVI5	TRUE	0.314147
3.03386	1.81147	3.15866		2.20163	2.0635	1.61824	0.739848	2.24184	2.51349	3.43029		2.0072	2.05311	1.07724	2.89724	1.76553	2.33914	2.62059		2.34483	1.54102	0.659925	2.47508	2.1375	2.16672	2.63227		2.57289	STOML1	TRUE	0.316506
8.21471	8.30246	8.09159	7.74766	7.30898	7.25814	8.62498	8.10182	7.01112	7.54905	8.67359	8.32441	5.20006	7.75549	7.47086	7.06026	5.87307	7.15755	7.21578	7.25115	6.97453	6.89312	6.97602	7.09497	6.66235	7.32706	7.15472	8.58071	8.30993	PKM	TRUE	0.106783
3.38543	3.23726	3.07211	3.14078	2.84398	3.75809	3.64731	3.0197	2.91265	2.75916	3.03914	4.1643	3.27202	3.02148	2.94111	2.65076	2.926	3.0268	3.7761	3.29866	3.13422	2.93168	3.38267	2.77821	3.31759	3.42895	3.74524	3.03034	3.35332	DHX29	TRUE	0.110469
4.13504	4.50653	3.59216	4.13586	3.75061	4.16511	4.488	4.34696	5.22843	3.59932	3.98094	4.15543	3.70155	4.23649	4.26679	3.83996	3.16993	4.22188	3.7866	4.18269	3.1635	3.851	4.18507	4.16752	4.06953	4.77979	4.31397	4.71699	4.13422	DNTTIP2	FALSE	0.107177
2.1375	2.43829	2.16993	2.06695	1.95233	2.89724	2.67356	2.23573	2.17313	2.66903	3.68594	1.10434	1.75702	2.31904	2.76129	2.70929	2.05658	1.80735	2.76765	1.852	1.9486	1.62761	3.07895	1.46989	1.85599	3.99005	1.82375	2.0072	2.43563	METTL22	FALSE	0.272099
3.39232	2.99095	3.49953	2.89336	1.83996	3.64501	1.848	3.91456	2.53605	3.28244	1.27501	3.36877		2.6017	2.91265	3.74416		2.62059	3.41143	2.97085	2.15056	0.526069	4.03474	2.52356	3.12598	4.44361	3.848	3.24031	3.33485	TP53BP1	FALSE	0.295139
1.04963	0.748461	4.31832			3.24641	1.18903	1.82782	0.941106	2.38957		0.367371	0.604071	0.925999	0.0143553	3.85599	2.05658	1	2.30451	0.895303			3.65764	0.879706		1.82782	1.22033	0.0565835	2.03914	TRO	TRUE	0.741886
1.04264	1.57046	1.4957	1.61824	0.704872	2.0072	1.29866	1.3505	1.70044	0.0976108	1.76977	1.12433	0.748461	1.65535	1.63691	1.31615		1.51096	1.13093	1.4489	1.11103	0.85599	1.36737	1.25701	1.0635	0.807355	1.54597	1.48027	1.1177	RRP15	FALSE	0.311304
8.19387	8.24793	7.25125	8.364	7.75295	8.13345	8.17757	7.56887	8.15259	7.69592	7.38448	7.81558	7.16239	8.73349	7.86691	7.74342	6.79429	8.12665	7.42417	8.15482	6.96394	7.48438	7.90292	7.94011	7.95849	7.34767	7.72588	8.41857	8.22308	RHOA	TRUE	0.0586194
3.03738	3.67469	3.50843	4.04177	3.69377	3.86295	3.57168	3.33199	3.36457	3.32048	2.854	3.80012	2.76341	3.66448	3.76553	3.10769	1.97453	3.36597	2.85798	4.07553	2.66221	3.42761	4.07296	3.90304	3.6311	3.65764	3.47379	4.15704	3.48156	DHX8	TRUE	0.142625
3.41143	1.25096	4.62585	3.57894	5.03034	2.05311	3.12598	3.68482	0	2.41143	3.17792	3.95884	3.62293	4.95513	3.46728	1.17632	2.75702	4.14893	3.38267	3.16189	3.16511	4.86443	0.807355	2.80116	3.42492	4.76713	3.70708	2.82375	2.35614	PRKCZ	TRUE	0.392608
	2.04614		1.65076			2.20789			1.60407								2.0036	2.16993	1.94111		1.90689			1.99277	2.43296		1.63227	1.81967	ZFY	TRUE	0.128501
5.51791	4.78031	4.29499	5.824	5.13791	5.0054	5.32085	5.40599	4.86938	4.76235	5.45976	5.92695	5.87897	4.78712	4.62644	4.85748	4.04089	4.89142	4.90593	5.48478	4.66448	5.1375	4.98778	4.49761	4.92932	4.95187	5.31397	5.2032	4.87873	IARS2	TRUE	0.0883085
4.61765	0.378512	6.76142	1.15056	0.555816	3.69377				0.659925		1.64616				1.69153		0.485427	0.378512	2.34767			4.93546	0.863938	1.58496					SYT1	TRUE	0.934358
1.45418		2.58015						0.31034	1.926						3.6792		0.400538					1.20789	1.63691		0.111031				NAV3	TRUE	0.784144
5.11353	4.94298	4.82579	5.13709	5.15381	4.90593	5.05572	5.04089	4.61589	5.00675	5.62176	4.90785	4.40395	4.96301	5.02901	5.2114	4.92267	4.45878	4.86196	4.35191	4.96625	5.42526	4.8339	5.00135	4.87922	4.3799	4.70543	4.44626	5.19849	IDH3G	TRUE	0.0619261
4.11936	2.0635	4.26153	1.65992	3.47897	3.07553	3.31904	3.29425	0.400538	3.35896	4.97453	2.55827	2.50589	4.2817	2.11437	2.49825	3.3799	2.3505	4.07724	0.739848	3.48285	3.23113	1.88753	2.83996	3.16511	2.95233	0.422233	1.58976	3.0197	ROGDI	FALSE	0.403714
2.15704		5.68229			1.92979	0.757023	2.70929		1.50589					0.422233				1.9486	0.495695			1.53605	2.49825	0.189034	1.09761			1.17632	PDZD4	TRUE	0.801992
2.80323		1.14405																											ATP2B3	TRUE	0.594445
4.06005	4.59813	3.33914	3.69377	3.59335	4.2555	5.19613	3.68145	4.52857	3.96717	3.80632	4.10266	3.14893	3.97911	4.53854	3.9241	2.72901	4.36107	4.03298	4.30816	2.49825	3.8339	4.30961	4.35966	4.09001	3.89627	4.04614	4.42291	4.65592	ROCK1	TRUE	0.141661
3.75596	5.29131	4.25927	3.78241	3.56682	4.3875	4.31615	4.38405	4.80323	3.852	3.34767	3.36177	2.79494	4.67073	5.39985	4.29499	3.32912	4.15056	3.5472	3.91265	3.02148	3.72574	3.93263	4.75382	4.87283	3.09085	4.26529	5.32048	4.48156	CBFB	FALSE	0.170023
1.29866	2.62527	0.604071	2.76553	2.90304	1.23879	2.10098	0.263034	1.90304	1.66448	2.31325	3.22805	1.68706	2.32769	2.09761	1.63227	1.5008	1.76977	1.22651	2.47249	2.48543	3.58376	1.51096	2.33628	4.09845	3.73552		3.10266	1.81147	PDK3	TRUE	0.420654
4.41346	4.24793	2.35332	3.22188	3.13914	5.25399	4.24031	4.24717	5.82171	5.48993	4.44427	3.61471	3.60999	6.01792	4.20085	3.92979	4.0072	5.7366	4.18824	2.56803	3.56316	3.23879	4.58616	6.57773	3.65306	3.86592	4.00899	2.28392	5.2555	HYAL2	TRUE	0.256573
2.43829	1.85599	3.51602	2.53605	1.36737	3.18428	3.80323	2.98185	1.85997	2.41414	1.92979	3.40463		1.1635	2.95606	2.70708		0.485427	1.43829	2.74846	2.48543	1.09761	2.88557	1.9486	0.411426	1.66448	0.344828	0.757023	2.33056	HDAC4	TRUE	0.46553
3.43162	4.27053	2.74201	3.4489	3.59455	3.99186	3.23726	2.43829	4.33557	4.49761	3.51728	1.95606	2.18903	4.69599	4.6837	3.52231	4.05572	4.43296	3.81865	3.28983	4.07125	3.52982	3.58376	4.98504	3.54967	3.98732	2.43563	3.848	4.59036	RASSF1	TRUE	0.21081
		4.26379	1.80323	3.70266	0.124328	4.17313			2.96162		3.1811	1.5509	2.40871			4.84649	2.76765	2.63459	2.0036		3.87578		1.26903	2.97453	4.22651		3.0197	1.94486	FGFR3	TRUE	0.42549
4.78712	4.83946	2.75916	4.56499	4.26828	3.81967	2.85599	4.10518	4.28466	4.45088	3.48543	3.12598	4.41549	4.92932	4.12846	4.37782	2.96717	4.2817	3.53481	3.84599	5.39129	3.9644	4.02857	4.73552	4.31542	2.23573	3.07724	3.94673	4.05918	IFI35	TRUE	0.183918
2.43029	2.52356	2.78869	1.8953	1.80323	2.58256	1.85997	2.38681	1.23879	2.14405	2.01436	2.01078	0.773996	2.05311	2.29278	2.6017		1.88362	2.31615	2.24184	1.86394	1.23879	2.94111	2.43296	2.1177	2.65076	1.78241	1.926	2.15056	HEATR6	FALSE	0.228353
4.76607	4.22728	3.73769	4.59335	5.2114	3.91552	4.04963	4.82324	3.69933	4.25475	3.80839	4.33199	4.99639	4.13668	4.18269	3.77083	4.90256	4.34837	4.52607	3.9607	5.35262	4.71809	3.74093	4.14812	4.26604	4.12598	4.40122	4.02414	4.13093	COASY	TRUE	0.103999
1.79494				0.887525	1.4489			0.0565835	0.275007				2.40054		2.58496	4.44626	1.24489	1.51096		2.33914			1.09761	1.82375	1.42223			0.925999	PLEKHH3	FALSE	0.658582
4.36667	4.11103	3.86691	3.46989	3.43696	5.11145	4.33271	3.58496	4.55827	3.91648	5.83112	4.4614	3.68482	4.51412	4.07211	4.24945	1.66903	4.37365	3.82273	3.84298	3.49953	3.06178	4.75489	4.33557	3.49057	3.90497	3.92695	4.06005	4.43696	MEF2A	TRUE	0.178678
4.60585	4.63285	4.64847	4.03386	4.5292	4.45681	4.15623	4.41684	4.14078	4.58376	3.43162	3.92315	3.63459	4.35332	4.8679	4.68145	3.80323	4.34483	4.71094	4.14405	4.46271	4.77873	4.51728	4.84097	4.38198	4.13914	4.2502	4.70764	4.56803	OTUD5	TRUE	0.0819253
4.60999	4.26978	4.30961	3.41684	3.64155	4.1177	3.8846	3.5656	5.12391	4.27947	3.04789	3.48929	2.91839	4.51728	3.5373	4.64904	3.28096	4.07382	3.87971	3.6565	3.35473	3.52732	4.37016	4.60881	3.39917	3.44361	3.97636	3.5741	4.16591	TFE3	TRUE	0.138509
1.97453	2.16027	2.54597	1.19535	1.65076	1.74416	2.07724	1.88362	2.72901	2.37295	2.24489	1.31615	0.565597	2.44626	2.17313	2.65992	2.14405	1.62293	1.62761	1.5008	1.65992	1.20163	2.21723	2.75275	2.25701	2.79701	1.94111	1.68706	2.81967	TBC1D25	TRUE	0.275495
5.02989	5.03958	3.7137	3.0072	3.14568	4.08661	3.99095	3.7301	5.81762	4.01525	4.42156	4.79442	2.16672	5.20711	3.83592	3.16832	2.86987	4.08321	2.9855	3.32481	2.27798	3.25248	3.62527	4.02857	3.59455	5.10224	4.31976	3.67469	4.16993	ACSL4	TRUE	0.224831
3.33628	3.01257	3.52857	4.23189	4.13093	5.29315	5.39232	4.07468	3.91934	4.12763	5.84649	4.31904	2.98914	4.1035	3.2555	3.84298	2.80735	4.53356	4.36177	5	3.48671	3.80323	5.17712	3.52607	4.04177	4.36387	3.86888	3.27798	5.62936	INPP5A	FALSE	0.195888
3.39094	2.95791	4.1102	3.24945	3.42492	3.37156	3.19849	3.70819	2.94111	3.35332	3.40871	2.86987	2.99095	3.30012	3.1177	3.24793	2.49057	3.25399	3.19692	3.24793	3.30305	3.04614	3.50589	3.41684	3.37851	3.0018	2.82782	3.14731	3.31615	GPKOW	FALSE	0.091417
4.00988	4.12846	4.6865	3.11103	3.53232	3.41549	3.37295	3.88362	3.64731	3.61235	2.76129	2.9782	3.46597	3.74739	4.13914	3.49825	2.68032	3.41549	3.89239	3.39643	3.02326	3.66903	3.71589	4.4489	3.90497	4.26003	3.47119	3.79805	3.59216	GRIPAP1	FALSE	0.12868
3.82477	3.38128	2.65535	2.40327	2.03914	4.06609	2.848	3.28983	3.10769	2.80735	2.71809	2.04614	1.87184	3.26903	3.69265	3.17153	2.98003	2.98368	3.21101	1.93357	3.37851	2.82171	2.99095	3.0993	3.27501	2.73335	3.19377	2.9542	3.60881	FTSJ1	TRUE	0.182506
	2.61589		2.83592	3.92979	1.45943	2.10434								2.21412			1.55582		2.46989		2.24184		1.36737	1.69599			3.66221	1.10434	PRR11	TRUE	0.382009
3.11603	0.748461	3.90207	0.823749	1.7866	3.58376	2.88557	3.34767		1.86394	2.95791	0.250962		1.15056	0.0565835	0.333424		0.650765	1.88362	3.93546		0.201634	3.47768	0	1.53107	5.84172			3.45286	REEP1	TRUE	0.769259
3.18269	2.82579	2.6017	1.42223	2.66221	3.35191	1.79494	2.76765	3.13093	3.39094	3.7137	3.60644	1.95233	4.96116	2.45418	1.86394	1.96717	2.95233	1.95606	0.400538	2.61117	2.80941	2.84398	1.99639	2.36737	3.29572	3.36036	1.79077	2.59216	ATP11A	TRUE	0.325451
1.82782	2.36177	2.38405	1.80735	1.81147	2.41684	2.43029	2.34483	1.75275	1.40599	1.66448	1.45418		1.72247	2.11103	2.14405		1.99277	1.96717	1.54597	1.86394	1.60881	2.84197	1.17632	1.83592	2.53107	1.61824	1.31615	1.40054	POLR1A	TRUE	0.220699
8.30255	6.91683	6.10873	7.32247	6.91934	8.71558	7.70625	7.68741	7.57939	8.00197	7.0662	7.91868	7.4465	7.86394	6.37208	7.99893	6.97407	8.04341	7.5445	7.38396	7.37972	6.98197	8.11437	6.8857	7.24375	8.2503	7.89791	6.70155	7.78666	LAPTM4A	TRUE	0.080809
3.848	2.79494	1.70487	2.03562	3.85898	0.163499	2.48285	2.51096	2.1375	2.02503	0.713696	2.0635	0.536053	3.24184	3.33199	1.28096		2.96162	0.163499	1.72247	3.00899	3.95884	1.41143	2.96532	3.28096	4.40803	3.11936	3.41414	2.62059	TTC7A	TRUE	0.475478
5.51412	4.89385	5.10727	6.00068	6.17373	5.65507	4.96901	5.90448	4.90641	5.87676	3.90497	4.84298	3.82375	4.91121	5.45121	5.51159	4.90689	5.12019	6.06846	6.41802	5.53356	6.07831	5.98914	5.1235	5.75782	5.27202	5.08449	4.85798	5.12722	IP6K2	TRUE	0.116248
					0.226509	1.50589		1.12433	1.11103						1.13093		0.422233		0.443607									1.20163	STON1.GTF2A1L	FALSE	0.516131
2.58736	2.82985	2.10098	3.06695	2.20477	3.21412	2.42761	2.50335	2.49057	2.07039	2.04264	2.94673	2.46989	2.87184	2.58256	2.07382	2.06695	2.62761	2.83188	2.5435	2.19849	2.07382	2.60881	2.75275	2.9855	3.23573	3.41549	2.62994	2.29572	SRBD1	FALSE	0.151749
3.3978	4.63052	5.38922	3.35755	3.11603	4.0036	3.66221	4.5601	3.16189	3.11603	1.04963	3.08576	0.575312	2.99095	4.86443	3.46728	1.53107	3.89142	2.38128	3.34341	1.64155	3.70155	3.47379	4.06437	3.22959	5.09297	3.68706	4.64212	3.81147	KIF2A	TRUE	0.334627
2.81558	5.02104	2.20789	2.49313	2.33342	3.1177	2.51349	0.163499	3.31904	3.32337	3.06178	1.02148	1.96717	3.46467	6.65249	0.214125		3.76235	3.25096	2.97085		2.33914	3.53232	5.88947	1.41684	1.51602		5.57168	3.93923	RASGRP2	TRUE	0.526474
3.09424	3.39917	2.75061	2.96532	2.63227	4.79181	3.37016	2.98368	3.46728	3.16672	3.30597	3.11103	3.87283	2.65535	3.46074	2.61824	2.58015	2.79077	3.10266	3.01436	3.75382	2.28392	3.86888	3.1127	3.48027	4.59932	4.10266	3.75275	3.23419	PSME4	FALSE	0.178351
2.80323	2.774	3.33771	2.73335	1.67356	3.21723	2.43296	4.55029	1.73552	2.62761	2.26003	3.61824		3.51223	3.06695	3.35755	1.65076	2.28096	2.50843	3.10434	1.23266	2.59216	3.51349	2.67356	2.91265	4.11853	3.95513	2.97085	3.0072	IFT80	TRUE	0.266838
4.86245	3.86096	6.4851	3.87184	4.41684	4.61412	4.98459	4.47638	4.92505	5.142	5.34873	3.96532	4.67525	4.83137	4.46074	5.23573	3.70929	3.85898	4.49825	3.88069	5.12433	4.68818	4.91169	4.70819	4.25248	4.29499	4.7339	4.03474	5.22342	SIRT2	TRUE	0.128791
5.44029	4.72955	4.86542	5.0237	4.85748	5.47411	4.46663	5.19061	4.49825	4.89385	4.97728	4.96671	4.74953	5.36562	4.42425	4.86394	5.26115	5.40395	5.72165	5.03826	5.26491	4.62819	4.93026	4.48993	5.64847	5.08236	6.02503	5.21568	5.5598	ERLEC1	TRUE	0.0797713
3.30451	2.79286	4.07382	2.4489	2.34767	2.78869	2.31904	1.31034	2.79286	4.13832	3.45154	2.6893	1.13093	3.46597	2.50335	2.17632	3.09085	2.71149	2.55336	2.97636	2.59216	1.95233	2.98914	3.43829	2.37295	2.03562	2.32481	2.40327	3.11437	PPP2R5B	TRUE	0.251774
0.214125		2.33342		0.400538	2.85599	4.07724		1.70929	2.24489	4.78346					0.0565835			3.11603	3.12433			2.59455			2.44626			3.8166	PYGM	TRUE	0.592478
																									3.64847				PAGE1	TRUE
	1.848			3.39232		6.68986			0.757023								1.39506	0.0976108		6.02326	2.9241			3.76871			2.35896	4.31542	PITX1	TRUE	0.679276
2.53356	1.22033	1.33342	1.95606	0.895303	2.68257	4.56071	3.0197	3.14568	2.34199	4.13011	3.0635	0.879706	1.88362	2.02148	3.69488		2.36457	2.14078	2.1177	2.59455	1.97085	3.37434	1.41143	2.37295	1.44361	0.594549	2.58496	2.03562	MAST4	TRUE	0.417603
4.34837	2.29278	2.7866	2.17951	1.852	3.27798	2.94486	1.79494	5.36457	4.27053	4.32697	5.87012	3.41007	6.5472	2.81147	1.54102		5.72192	2.49057	2.90304	1	2.22959	4.2817	5.09424	1.91456	1.74416	4.52231	0.604071	3.83592	ADGRF5	TRUE	0.474432
					1.82782		1.79494							0.669027				0.0840643					1.1635		2.84197				SDK2	TRUE	0.697029
3.25096	3.22651	3.95327	3.41684	2.86196	3.6017	3.20789	3.69822	2.92979	2.90497	3.22959	3.62176	2.70708	3.16993	3.38405	3.56316	2.40599	3.46728	2.97636	3.24793	2.67129	2.58256	3.58736	3.24031	3.27798	3.8846	3.60881	3.60288	3.01078	NUP133	FALSE	0.119399
5.55643	5.17991	6.57365	5.50048	4.55949	6.34056	5.749	5.99842	4.91695	5.1235	5.86691	5.89336	5.66818	5.36282	5.21374	6.34678	4.40259	5.16591	5.54504	5.49346	4.89385	4.56621	5.94767	5.54071	5.28873	4.96486	6.28891	5.61648	5.1375	NUCKS1	TRUE	0.101347
4.75007	4.96901	4.95791	5.20516	5.68482	5.25475	5.32876	5.44361	4.47508	4.57531	5.13791	5.30961	4.13504	4.61589	4.47638	4.76394	3.8125	4.82731	4.79025	4.98231	4.30086	6.14995	4.87086	4.52105	5.65019	5.28503	5.02636	5.05615	4.96947	VPS35	FALSE	0.0989474
4.98959	4.65707	4.95884	4.69265	4.98959	5.18982	5.44162	4.80168	4.68762	4.75702	5.67864	5.07125	4.64616	4.64731	4.89579	4.87086	4.09677	4.59813	4.70708	4.89239	4.29057	4.51538	5.0648	4.71864	4.52544	5.62556	5.0365	5.1819	4.81865	DNAJA2	TRUE	0.0719097
2.7137	4.4614		3.0018	3.7761	1.61824	2.07382	0.941106	4.30597	3.17951			2.54102	4.01614	2.62761	1.4489	3.03034	2.33342	2.42761	3.0054	1.87971	3.79597	2.14078	3.48156	3.03562	1.5656		2.49825	3.16189	BCL3	TRUE	0.329707
[truncated: 17,017 more rows]

## Sheet: Tissues - Proteome
Adrenal.gland	Appendix	Brain	Colon	Duodenum	Endometrium	Esophagus	Fallopian.tube	Fat	Gallbladder	Heart	Kidney	Liver	Lung	Lymph.node	Ovary	Pancreas	Placenta	Prostate	Rectum	Salivary.gland	Small.intestine	Smooth.muscle	Spleen	Stomach	Testis	Thyroid	Tonsil	Urinary.bladder	ids	hasParalogs	coeff.var
[truncated: 13,640 more rows]

[truncated: 3 more sheets: Paralog pairs (Embryo), Paralog pairs (Transc.), Paralog pairs (Prot.)]
