# Supplementary material for: Conserved exchange of paralog proteins during neuronal differentiation
Source: bioRxiv preprint, doi:10.1101/2021.07.22.453347, version 1 (2021-07-23)
Supplement: Table S4 [file 453347_file05.xlsx]

## Sheet: Summary
Homo sapiens
MS Proteomics data from human neuron differentiation (LFQ quantification) from Djuric et al., 2017
	column names
	iPS37	log2 LFQ protein intensity values from iPCs as reported in Djuric et al., 2017
	NPC37	log2 LFQ protein intensity values from NPC as reported in Djuric et al., 2017
	Neu37	log2 LFQ protein intensity values from Neuron as reported in Djuric et al., 2017
	logFC	log2 fold change of protein for specific comparison
	AveExpr	Average quantification for specific comparison
	t	t-statistics
	P.Value	p values for the comparison as calculated by limma
	adj.P.Val	adjusted p value
	B	B statistic
Mus musculus
MS proteome quantification (TMT-10 plex)for mouse in vitro neuronal differentiation
	column names
	DIV0	log2 reporter ion intensity for day in vitro 0
	DIV3	log2 reporter ion intensity for day in vitro 3
	DIV10	log2 reporter ion intensity for day in vitro 10
	pool	log2 reporter ion intensity for pooled sample
	logFC	log2 fold change of protein for specific comparison
	AveExpr	Average quantification for specific comparison
	t	t-statistics
	P.Value	p values for the comparison as calculated by limma
	adj.P.Val	adjusted p value
	B	B statistic
Rattus novergicus
MS Proteomics data from rat mouse neuron differentiation (di-methyl labelling)
re-analyzed from Frese et al., 2017 (PRIDE: PXD005031)
	column names
	DIV1.rep	Log2 (iBAQ) protein intensity for day in vitro 1
	DIV5.rep	Log2 (iBAQ) protein intensity for day in vitro 5
	DIV14.rep	Log2 (iBAQ) protein intensity for day in vitro 14
	fdrtool.pvalue	p values for specific comparison, as calculated by fdrtools
	fdrtool.qvalue	q values for specific comparison, as calculated by fdrtools
Danio rerio
MS proteomics data from Zebrafish neuronal differentiation (di-methyl labelling)
	column names
	iBAQ.L.Mix1-3	Protein iBAQ quantification values from Light Label (Stem) in the different replicates (Mix)
	iBAQ.H.Mix1-3	Protein iBAQ quantification values from Light Label (Neuron) in the different replicates (Mix)
	Log.Ratio.H.L.normalized	Log2 ratio H/L between labels (Neuron/Stem)
	fdrtool.pvalue	p values for specific comparison, as calculated by fdrtools
	fdrtool.qvalue	q values for specific comparison, as calculated by fdrtools

## Sheet: Homo sapiens
Majority.protein.Uniprot.IDs	Protein.names	Gene.Symbol	iPS37_1	iPS37_2	iPS37_3	NPC37_1	NPC37_2	NPC37_3	Neu37_1	Neu37_2	Neu37_3	Razor...unique.peptides	Unique...razor.sequence.coverage....	GOBP.name	GOMF.name	GOCC.name	KEGG.name	logFC.NPC.iPS	AveExpr.NPC.iPS	t.NPC.iPS	P.Value.NPC.iPS	adj.P.Val.NPC.iPS	B.NPC.iPS	logFC.Neu.iPS	AveExpr.Neu.iPS	t.Neu.iPS	P.Value.Neu.iPS	adj.P.Val.Neu.iPS	B.Neu.iPS	logFC.Neu.NPC	AveExpr.Neu.NPC	t.Neu.NPC	P.Value.Neu.NPC	adj.P.Val.Neu.NPC	B.Neu.NPC	condition1	condition2	condition3
A0A087WZZ9;A0A024QZP7;P06493;A0A087WY43;E5RIU6;P06493-2	Cyclin-dependent kinase 1	CDK1;CDC2	25.5319	25.696	25.4551	25.4444	23.6091	24.1908	22.6168	24.1029	22.9168	8	49.1	activation of immune response;activation of innate immune response;activation of MAPK activity;activation of MAPKK activity;activation of protein kinase activity;aging;alternative nuclear mRNA splicing, via spliceosome;anaphase-promoting complex-dependent proteasomal ubiquitin-dependent protein catabolic process;anatomical structure development;anatomical structure morphogenesis;apoptosis;axon gu…	adenyl nucleotide binding;adenyl ribonucleotide binding;ATP binding;binding;catalytic activity;cation binding;chromatin binding;cyclin binding;cyclin-dependent protein kinase activity;cyclin-dependent protein kinase regulator activity;DNA binding;enzyme regulator activity;histone kinase activity;ion binding;kinase activity;kinase regulator activity;metal ion binding;nucleic acid binding;nucleotid…	carboxy-terminal domain protein kinase complex;cell junction;cell part;cell-cell junction;centrosome;chromatin;chromosomal part;cyclin-dependent protein kinase holoenzyme complex;cytoplasm;cytoplasmic cyclin-dependent protein kinase holoenzyme complex;cytoplasmic part;cytoskeletal part;cytosol;extracellular membrane-bounded organelle;extracellular organelle;extracellular region part;extracellular…	Bladder cancer;Cell cycle;Chronic myeloid leukemia;Gap junction;Glioma;Measles;Melanoma;Non-small cell lung cancer;Oocyte meiosis;p53 signaling pathway;Pancreatic cancer;Pathways in cancer;Progesterone-mediated oocyte maturation;Small cell lung cancer;T cell receptor signaling pathway;Tight junction	-1.14621	24.9879	-2.40712	0.044408	0.187085	-4.44341	-2.34883	24.3866	-5.47073	0.000504639	0.00613673	0.0869762	-1.20261	23.8135	-2.02708	0.0795231	0.293537	-4.90565	NPC.iPS	Neu.iPS	Neu.NPC
O95394;O95394-3;O95394-4;D6RCQ8;D6RF77;D6RIS6;A0A087WT27;J3KN95	Phosphoacetylglucosamine mutase	PGM3	20.776	20.8355	20.7825	20.8351	19.6487	21.1021	20.6849	21.0577		3	7	alcohol biosynthetic process;alcohol metabolic process;amino sugar biosynthetic process;amino sugar metabolic process;anatomical structure development;biosynthetic process;carbohydrate biosynthetic process;carbohydrate metabolic process;cellular biosynthetic process;cellular carbohydrate biosynthetic process;cellular carbohydrate metabolic process;cellular macromolecule metabolic process;cellular…	binding;catalytic activity;cation binding;intramolecular transferase activity;intramolecular transferase activity, phosphotransferases;ion binding;isomerase activity;magnesium ion binding;metal ion binding;phosphoacetylglucosamine mutase activity;phosphoglucomutase activity	cell part;cytoplasmic part;cytosol;intracellular part	Amino sugar and nucleotide sugar metabolism	-0.26936	20.6633	-0.644418	0.538347	0.721986	-6.61606	0.07332	20.8273	0.20578	0.84252	0.902508	-6.73538	0.34268	20.6657	0.640391	0.543794	0.767602	-6.39502	NPC.iPS	Neu.iPS	Neu.NPC
P05386	60S acidic ribosomal protein P1	RPLP1	27.1728	28.485	27.8063	27.107	25.8168	26.5999	26.1716	25.2337	26.0323	3	79.8	biosynthetic process;catabolic process;cellular biosynthetic process;cellular catabolic process;cellular component disassembly;cellular component disassembly at cellular level;cellular component organization;cellular component organization at cellular level;cellular component organization or biogenesis;cellular component organization or biogenesis at cellular level;cellular macromolecular complex…	binding;nucleic acid binding;RNA binding;structural constituent of ribosome;structural molecule activity	adherens junction;anchoring junction;cell junction;cell part;cell-substrate adherens junction;cell-substrate junction;cytoplasm;cytoplasmic part;cytosol;cytosolic large ribosomal subunit;extracellular membrane-bounded organelle;extracellular organelle;extracellular region part;extracellular vesicular exosome;focal adhesion;intracellular organelle part;intracellular part;large ribosomal subunit;ma…	Ribosome	-1.31348	27.1646	-2.80428	0.0243618	0.137583	-3.83951	-2.00886	26.8169	-4.5735	0.00160851	0.0125421	-1.11984	-0.695373	26.1602	-1.52982	0.167034	0.430901	-5.59437	NPC.iPS	Neu.iPS	Neu.NPC
Q08379-2;Q08379	Golgin subfamily A member 2	GOLGA2	20.2484	19.9313	20.4338	20.2661	21.4533	20.6733	20.9971	20.9466	21.628	3	5.3	biological regulation;biosynthetic process;catabolic process;cell cycle;cellular biosynthetic process;cellular catabolic process;cellular macromolecule biosynthetic process;cellular macromolecule catabolic process;cellular macromolecule metabolic process;cellular metabolic process;cellular nitrogen compound metabolic process;cellular process;histone mRNA catabolic process;histone mRNA metabolic p…	adenyl nucleotide binding;adenyl ribonucleotide binding;adenylyltransferase activity;ATP binding;binding;catalytic activity;cation binding;enzyme binding;identical protein binding;ion binding;kinase binding;magnesium ion binding;manganese ion binding;metal ion binding;nucleotide binding;nucleotidyltransferase activity;polynucleotide adenylyltransferase activity;protein binding;protein dimerizatio…	cell part;cis-Golgi network;coated vesicle;cytoplasmic membrane-bounded vesicle;cytoplasmic part;cytoplasmic vesicle;ER to Golgi transport vesicle;Golgi apparatus;Golgi apparatus part;Golgi cis cisterna;Golgi cisterna;Golgi cisterna membrane;Golgi membrane;intracellular membrane-bounded organelle;intracellular organelle;intracellular organelle part;intracellular part;membrane;membrane-bounded org…		0.593097	20.501	1.55994	0.159549	0.383796	-5.66329	0.98606	20.6975	2.8835	0.0194231	0.0661625	-3.68529	0.392963	20.9941	0.935828	0.378478	0.646818	-6.26773	NPC.iPS	Neu.iPS	Neu.NPC
A0A087WTT1;P11940-2;P11940;E7EQV3;E7ERJ7;H0YAR2;Q9H361	Polyadenylate-binding protein;Polyadenylate-binding protein 1;Polyadenylate-binding protein 3	PABPC1;PABPC3	27.7325	27.7218	27.3901	27.0718	27.5188	27.1955	26.7764	26.8742	26.9502	29	57.5	biological regulation;biosynthetic process;catabolic process;cell maturation;cellular biosynthetic process;cellular catabolic process;cellular developmental process;cellular macromolecule biosynthetic process;cellular macromolecule catabolic process;cellular macromolecule metabolic process;cellular metabolic process;cellular nitrogen compound metabolic process;cellular process;cellular process in…	binding;mRNA binding;nucleic acid binding;nucleotide binding;poly(A) RNA binding;poly(U) RNA binding;poly-purine tract binding;poly-pyrimidine tract binding;protein binding;protein C-terminus binding;RNA binding;single-stranded RNA binding;translation activator activity;translation regulator activity;translation regulator activity, nucleic acid binding	adherens junction;anchoring junction;catalytic step 2 spliceosome;cell junction;cell part;cell-substrate adherens junction;cell-substrate junction;cytoplasm;cytoplasmic part;cytosol;extracellular membrane-bounded organelle;extracellular organelle;extracellular region part;extracellular vesicular exosome;focal adhesion;intracellular membrane-bounded organelle;intracellular non-membrane-bounded org…	mRNA surveillance pathway;RNA degradation;RNA transport	-0.35274	27.4384	-1.20918	0.26302	0.502669	-6.09481	-0.747863	27.2409	-2.47926	0.0368514	0.104583	-4.32511	-0.395123	27.0645	-1.26926	0.242274	0.514598	-5.91592	NPC.iPS	Neu.iPS	Neu.NPC
H0YBA1;A6NNN6;E7ETA6;Q15154-2;Q15154	Pericentriolar material 1 protein	PCM1		20.2822	20.0022	20.932	20.9506			20.3408		1	1.4	anatomical structure formation involved in morphogenesis;biological regulation;cell cycle;cell cycle process;cell projection assembly;cell projection organization;cellular component assembly;cellular component assembly at cellular level;cellular component assembly involved in morphogenesis;cellular component movement;cellular component organization;cellular component organization at cellular leve…	binding;identical protein binding;protein binding	cell part;centriolar satellite;centrosome;cytoplasm;cytoplasmic part;cytoskeletal part;cytosol;intracellular non-membrane-bounded organelle;intracellular organelle;intracellular organelle part;intracellular part;macromolecular complex;membrane;microtubule organizing center;microtubule organizing center part;non-membrane-bounded organelle;nuclear membrane;nuclear part;organelle;organelle membrane;…		0.79911	20.5418	2.07834	0.0865677	0.269665	-4.79882	0.198615	20.2084	0.360032	0.732512	0.824164	-6.39626	-0.600495	20.7412	-1.05708	0.343794	0.615692	-5.74451	NPC.iPS	Neu.iPS	Neu.NPC
Q08380;K7ESM3;K7EKQ5;K7EP36	Galectin-3-binding protein	LGALS3BP	21.7351	21.2779	21.3825	20.8473		21.8802	21.7058	21.0209	20.8214	5	14	biological adhesion;biological regulation;cell adhesion;cellular component organization;cellular component organization or biogenesis;cellular defense response;cellular membrane organization;cellular process;cellular response to stimulus;defense response;endocytosis;establishment of localization;membrane invagination;membrane organization;receptor-mediated endocytosis;regulation of biological pro…	cargo receptor activity;receptor activity;scavenger receptor activity	blood microparticle;cell part;extracellular matrix;extracellular membrane-bounded organelle;extracellular organelle;extracellular region part;extracellular space;extracellular vesicular exosome;membrane;membrane-bounded organelle;membrane-bounded vesicle;organelle;proteinaceous extracellular matrix;vesicle		-0.101398	21.4246	-0.237867	0.819236	0.90535	-6.70011	-0.282417	21.3239	-0.792197	0.45007	0.597801	-6.53431	-0.181018	21.2551	-0.363808	0.72753	0.864446	-6.54605	NPC.iPS	Neu.iPS	Neu.NPC
Q08722-2;Q08722-3;Q08722-4;Q08722	Leukocyte surface antigen CD47	CD47		21.2998	19.4256			21.2228	23.885	24.068		2	6.5	biological adhesion;biological regulation;blood coagulation;cell adhesion;cell migration;cell motility;cell surface receptor linked signaling pathway;cellular component movement;cellular component organization;cellular component organization at cellular level;cellular component organization or biogenesis;cellular component organization or biogenesis at cellular level;cellular process;cellular res…	molecular transducer activity;receptor activity;signal transducer activity;signaling receptor activity;thrombospondin receptor activity	cell part;extracellular membrane-bounded organelle;extracellular organelle;extracellular region part;extracellular vesicular exosome;integral to membrane;integral to plasma membrane;intrinsic to membrane;intrinsic to plasma membrane;membrane;membrane part;membrane-bounded organelle;membrane-bounded vesicle;organelle;plasma membrane;plasma membrane part;vesicle	ECM-receptor interaction	0.86015	20.6494	0.941614	0.393496	0.619441	-5.96325	3.61384	22.1696	5.43208	0.00131811	0.0112087	-0.553155	2.7537	23.0586	4.80656	0.0063552	0.0726529	-1.74694	NPC.iPS	Neu.iPS	Neu.NPC
Q08752	Peptidyl-prolyl cis-trans isomerase D	PPID	23.511	23.3106	24.5656	23.0921	26.4116	22.8237	22.8907	22.8107	23.748	5	18.1	apoptosis;biological regulation;cell death;cellular component assembly;cellular component organization;cellular component organization at cellular level;cellular component organization or biogenesis;cellular component organization or biogenesis at cellular level;cellular macromolecule metabolic process;cellular metabolic process;cellular process;cellular protein metabolic process;cellular respons…	binding;catalytic activity;cis-trans isomerase activity;cyclosporin A binding;drug binding;estrogen receptor binding;heat shock protein binding;hormone receptor binding;Hsp7 protein binding;Hsp9 protein binding;isomerase activity;nuclear hormone receptor binding;peptide binding;peptidyl-prolyl cis-trans isomerase activity;protein binding;receptor binding;steroid hormone receptor binding;transcrip…	cell part;cytoplasm;intracellular membrane-bounded organelle;intracellular non-membrane-bounded organelle;intracellular organelle;intracellular organelle part;intracellular part;membrane-bounded organelle;non-membrane-bounded organelle;nuclear part;nucleolus;nucleoplasm;nucleus;organelle;organelle part	Calcium signaling pathway;Huntington's disease;Parkinson's disease	0.31338	23.9524	0.339294	0.743614	0.860545	-6.77834	-0.645947	23.4728	-1.44821	0.183887	0.318511	-5.83411	-0.959327	23.6295	-1.04466	0.328643	0.600896	-6.16145	NPC.iPS	Neu.iPS	Neu.NPC
Q08945	FACT complex subunit SSRP1	SSRP1	26.1377	26.0697	26.6046	25.9631	25.3772	26.347	24.846	25.9471	25.2151	16	26.8	biological regulation;biosynthetic process;cellular biosynthetic process;cellular component organization;cellular component organization at cellular level;cellular component organization or biogenesis;cellular component organization or biogenesis at cellular level;cellular macromolecule biosynthetic process;cellular macromolecule metabolic process;cellular metabolic process;cellular nitrogen comp…	binding;chromatin binding;DNA binding;nucleic acid binding	cell part;chromosome;cytoplasm;intracellular membrane-bounded organelle;intracellular non-membrane-bounded organelle;intracellular organelle;intracellular organelle part;intracellular part;membrane-bounded organelle;non-membrane-bounded organelle;nuclear part;nucleolus;nucleoplasm;nucleus;organelle;organelle part		-0.37491	26.0832	-1.05616	0.323449	0.557222	-6.26031	-0.934567	25.8034	-2.43615	0.03947	0.108982	-4.39281	-0.559657	25.6159	-1.3039	0.230818	0.502847	-5.87525	NPC.iPS	Neu.iPS	Neu.NPC
Q08AM6;H3BUU8	Protein VAC14 homolog	VAC14							21.5624	21.8553		2	3.7	biological regulation;biosynthetic process;cellular biosynthetic process;cellular lipid metabolic process;cellular metabolic process;cellular process;cellular response to stimulus;glycerolipid biosynthetic process;glycerolipid metabolic process;glycerophospholipid biosynthetic process;glycerophospholipid metabolic process;lipid biosynthetic process;lipid metabolic process;metabolic process;organo…	receptor activity	cell part;cytoplasmic part;early endosome membrane;endoplasmic reticulum;endosomal part;endosome membrane;Golgi apparatus part;Golgi membrane;intracellular membrane-bounded organelle;intracellular organelle;intracellular organelle part;intracellular part;late endosome membrane;macromolecular complex;membrane;membrane part;membrane-bounded organelle;organelle;organelle membrane;organelle part;PAS …																				NPC.iPS	Neu.iPS	Neu.NPC
Q08J23-3;Q08J23-2;Q08J23	tRNA (cytosine(34)-C(5))-methyltransferase	NSUN2	23.6183	23.6232	24.0153	23.2585	21.9659	22.6425		22.6588	21.5234	8	21.8	cell cycle phase;cell cycle process;cell division;cellular component organization;cellular component organization at cellular level;cellular component organization or biogenesis;cellular component organization or biogenesis at cellular level;cellular macromolecule metabolic process;cellular metabolic process;cellular nitrogen compound metabolic process;cellular process;macromolecule metabolic pro…	binding;catalytic activity;methyltransferase activity;nucleic acid binding;RNA binding;RNA methyltransferase activity;S-adenosylmethionine-dependent methyltransferase activity;transferase activity;transferase activity, transferring one-carbon groups;tRNA (cytosine) methyltransferase activity;tRNA (cytosine-5-)-methyltransferase activity;tRNA binding;tRNA methyltransferase activity	cell part;cytoplasm;cytoskeletal part;intracellular membrane-bounded organelle;intracellular non-membrane-bounded organelle;intracellular organelle;intracellular organelle part;intracellular part;membrane-bounded organelle;non-membrane-bounded organelle;nuclear part;nucleolus;nucleus;organelle;organelle part;spindle		-1.12997	23.1873	-2.89969	0.0211272	0.126539	-3.69446	-1.66117	23.0878	-3.68425	0.00710784	0.0328215	-2.48599	-0.531203	22.4098	-0.948357	0.376818	0.64445	-6.1434	NPC.iPS	Neu.iPS	Neu.NPC
Q09028-3;Q09028;Q09028-2;Q09028-4	Histone-binding protein RBBP4	RBBP4	25.2333	25.1437	25.1443	26.2688	26.5881	25.2396	23.6791	24.1923	24.8766	4	25.9	ATP-dependent chromatin remodeling;biological regulation;biosynthetic process;cell cycle;cell cycle process;cellular biosynthetic process;cellular component assembly;cellular component assembly at cellular level;cellular component organization;cellular component organization at cellular level;cellular component organization or biogenesis;cellular component organization or biogenesis at cellular l…	binding;enzyme binding;histone binding;histone deacetylase binding;protein binding	CAF-1 complex;cell part;chromatin;chromatin assembly complex;chromatin remodeling complex;chromosomal part;ESC/E(Z) complex;histone deacetylase complex;histone methyltransferase complex;intracellular membrane-bounded organelle;intracellular organelle;intracellular organelle part;intracellular part;ISWI complex;macromolecular complex;membrane-bounded organelle;methyltransferase complex;nuclear chr…		0.858387	25.603	2.16624	0.0641102	0.230429	-4.80507	-0.924467	24.7115	-2.45701	0.0381806	0.106805	-4.36008	-1.78285	25.1407	-3.65155	0.00722685	0.0766632	-2.49109	NPC.iPS	Neu.iPS	Neu.NPC
P05387	60S acidic ribosomal protein P2	RPLP2	26.5832	26.7967	27.1666	26.9574	27.4428	25.4014	26.1907	25.8855	26.9662	9	83.5	biosynthetic process;catabolic process;cellular biosynthetic process;cellular catabolic process;cellular component disassembly;cellular component disassembly at cellular level;cellular component organization;cellular component organization at cellular level;cellular component organization or biogenesis;cellular component organization or biogenesis at cellular level;cellular macromolecular complex…	binding;nucleic acid binding;RNA binding;structural constituent of ribosome;structural molecule activity	adherens junction;anchoring junction;cell junction;cell part;cell-substrate adherens junction;cell-substrate junction;cytoplasmic part;cytosol;cytosolic large ribosomal subunit;extracellular membrane-bounded organelle;extracellular organelle;extracellular region part;extracellular vesicular exosome;focal adhesion;intracellular non-membrane-bounded organelle;intracellular organelle;intracellular o…	Ribosome	-0.24832	26.7247	-0.465273	0.654834	0.806597	-6.72284	-0.501397	26.5982	-1.30792	0.22561	0.368737	-6.00819	-0.253077	26.474	-0.431997	0.67788	0.845557	-6.62716	NPC.iPS	Neu.iPS	Neu.NPC
Q09161	Nuclear cap-binding protein subunit 1	NCBP1	20.9166	21.4042	21.8587	21.1027		22.4427	21.0356	21.7427		3	4.2	biological regulation;biosynthetic process;catabolic process;cellular biosynthetic process;cellular catabolic process;cellular component assembly;cellular component assembly at cellular level;cellular component organization;cellular component organization at cellular level;cellular component organization or biogenesis;cellular component organization or biogenesis at cellular level;cellular macrom…	binding;nucleic acid binding;RNA binding;RNA cap binding	cell part;cytoplasm;cytoplasmic part;cytosol;intracellular membrane-bounded organelle;intracellular organelle;intracellular organelle part;intracellular part;macromolecular complex;membrane-bounded organelle;mitochondrion;mRNA cap binding complex;nuclear cap binding complex;nuclear part;nucleoplasm;nucleus;organelle;organelle part;protein complex;ribonucleoprotein complex;RNA cap binding complex	mRNA surveillance pathway;RNA transport;Spliceosome	0.379565	21.545	0.730827	0.490136	0.691942	-6.44055	-0.00399	21.3915	-0.00898583	0.993068	0.995164	-6.75899	-0.383555	21.5809	-0.618625	0.560852	0.77927	-6.31701	NPC.iPS	Neu.iPS	Neu.NPC
Q09666	Neuroblast differentiation-associated protein AHNAK	AHNAK	17.5436	17.9614	19.0508	17.4328	21.4677	18.2113	16.2885	17.7226	18.057	92	32.6	biological regulation;cellular component assembly;cellular component organization;cellular component organization or biogenesis;macromolecular complex assembly;macromolecular complex subunit organization;protein complex assembly;protein complex subunit organization;protein oligomerization;regulation of biological process;regulation of cellular metabolic process;regulation of cellular process;regu…		actin cytoskeleton;adherens junction;anchoring junction;cell junction;cell part;cell-cell contact zone;cell-cell junction;cell-substrate adherens junction;cell-substrate junction;contractile fiber part;costamere;cytoplasm;cytoplasmic part;cytoskeleton;cytosol;extracellular membrane-bounded organelle;extracellular organelle;extracellular region part;extracellular vesicular exosome;focal adhesion;i…		0.85198	18.6113	0.859218	0.416613	0.637237	-6.4482	-0.829243	17.7707	-1.46514	0.179339	0.312246	-5.81238	-1.68122	18.1966	-1.63571	0.143008	0.400455	-5.45464	NPC.iPS	Neu.iPS	Neu.NPC
Q0VDF9	Heat shock 70 kDa protein 14	HSPA14	21.1816	21.5805			20.7316			20.0675		3	13.4	cellular macromolecule metabolic process;cellular metabolic process;cellular process;cellular protein metabolic process;'de novo' cotranslational protein folding;'de novo' protein folding;macromolecule metabolic process;metabolic process;primary metabolic process;protein folding;protein metabolic process	adenyl nucleotide binding;adenyl ribonucleotide binding;ATP binding;binding;nucleotide binding;purine nucleotide binding;purine ribonucleoside triphosphate binding;purine ribonucleotide binding;ribonucleotide binding	cell part;cytoplasmic part;cytosol;intracellular part;membrane		-0.649455	21.1645	-1.21967	0.281825	0.518109	-5.6813	-1.31353	20.9432	-2.33824	0.0628276	0.148645	-4.30839	-0.66407	20.3995	-0.893151	0.428788	0.692309	-5.7536	NPC.iPS	Neu.iPS	Neu.NPC
C9JH92;A6NP24;Q08257-3;Q08257	Quinone oxidoreductase	CRYZ	21.7423	21.1877	21.2861	21.6087	21.9813	21.619	19.6718	19.8506	20.9675	2	19.9	catabolic process;cellular catabolic process;cellular component assembly;cellular component organization;cellular component organization or biogenesis;cellular metabolic process;cellular process;macromolecular complex assembly;macromolecular complex subunit organization;metabolic process;multicellular organismal process;neurological system process;protein complex assembly;protein complex subunit …	binding;catalytic activity;cation binding;coenzyme binding;cofactor binding;ion binding;metal ion binding;mRNA 3'-UTR binding;mRNA binding;NADP binding;NADPH binding;NADPH:quinone reductase activity;nucleic acid binding;nucleotide binding;oxidoreductase activity;oxidoreductase activity, acting on NADH or NADPH;oxidoreductase activity, acting on NADH or NADPH, quinone or similar compound as accept…	cell part;cytoplasm;cytoplasmic part;cytosol;extracellular membrane-bounded organelle;extracellular organelle;extracellular region part;extracellular vesicular exosome;Golgi apparatus;intracellular membrane-bounded organelle;intracellular organelle;intracellular part;membrane-bounded organelle;membrane-bounded vesicle;organelle;vesicle		0.33094	21.5708	1.08867	0.30976	0.544681	-6.22649	-1.24205	20.7843	-2.96001	0.0172251	0.0610686	-3.56393	-1.57299	20.9498	-3.6906	0.00684637	0.0746445	-2.43518	NPC.iPS	Neu.iPS	Neu.NPC
Q0VF96;Q0VF96-2	Cingulin-like protein 1	CGNL1	21.4186	21.7498	21.4444							5	6.3		catalytic activity;hydrolase activity;hydrolase activity, acting on acid anhydrides;hydrolase activity, acting on acid anhydrides, in phosphorus-containing anhydrides;motor activity;nucleoside-triphosphatase activity;pyrophosphatase activity	cell junction;cell part;cell-cell junction;cytoskeletal part;intracellular organelle part;intracellular part;macromolecular complex;myosin complex;occluding junction;organelle part;protein complex;tight junction																				NPC.iPS	Neu.iPS	Neu.NPC
Q0VGL1;A0A087X1E5;A0A087WVU0;A0A087WT92;A0A087WV46;C9JXA7	Ragulator complex protein LAMTOR4;Ragulator complex protein LAMTOR4, N-terminally processed	LAMTOR4							21.7746	21.7495	22.54	2	28.3	biological regulation;cellular component organization;cellular component organization or biogenesis;cellular process;cellular response to acid;cellular response to amine stimulus;cellular response to amino acid stimulus;cellular response to chemical stimulus;cellular response to endogenous stimulus;cellular response to organic nitrogen;cellular response to organic substance;cellular response to s…		cell part;cytoplasmic part;endosomal part;intracellular membrane-bounded organelle;intracellular organelle;intracellular organelle part;intracellular part;lysosome;lytic vacuole;macromolecular complex;membrane part;membrane-bounded organelle;organelle;organelle part;protein complex;Ragulator complex;vacuole																				NPC.iPS	Neu.iPS	Neu.NPC
Q10471;Q10471-2	Polypeptide N-acetylgalactosaminyltransferase 2;Polypeptide N-acetylgalactosaminyltransferase 2 soluble form	GALNT2	21.7186		22.0646	22.0778		22.3214		21.744		5	15.8	biosynthetic process;carbohydrate metabolic process;cellular carbohydrate metabolic process;cellular macromolecule metabolic process;cellular metabolic process;cellular process;cellular protein metabolic process;glycosylation;immunoglobulin biosynthetic process;macromolecule biosynthetic process;macromolecule glycosylation;macromolecule metabolic process;macromolecule modification;metabolic proce…	acetylgalactosaminyltransferase activity;binding;carbohydrate binding;catalytic activity;cation binding;ion binding;manganese ion binding;metal ion binding;polypeptide N-acetylgalactosaminyltransferase activity;transferase activity;transferase activity, transferring glycosyl groups;transferase activity, transferring hexosyl groups;transition metal ion binding;UDP-glycosyltransferase activity	cell part;cytoplasmic part;extracellular membrane-bounded organelle;extracellular organelle;extracellular region part;extracellular vesicular exosome;Golgi apparatus;Golgi apparatus part;Golgi cisterna membrane;Golgi membrane;Golgi stack;integral to Golgi membrane;integral to membrane;integral to organelle membrane;intracellular membrane-bounded organelle;intracellular organelle;intracellular org…	Mucin type O-Glycan biosynthesis	0.30798	22.0456	0.777636	0.468538	0.677353	-6.30968	-0.147615	21.8424	-0.265087	0.80079	0.877429	-6.42998	-0.455595	22.0477	-0.790078	0.468975	0.718615	-5.98795	NPC.iPS	Neu.iPS	Neu.NPC
Q10567-2;Q10567	AP-1 complex subunit beta-1	AP1B1	20.9152	20.2763	21.0404	21.3472		21.3665	22.4874	20.5978	20.333	5	7.9	antigen processing and presentation;antigen processing and presentation of exogenous antigen;antigen processing and presentation of exogenous peptide antigen;antigen processing and presentation of exogenous peptide antigen via MHC class II;antigen processing and presentation of peptide antigen;antigen processing and presentation of peptide antigen via MHC class II;antigen processing and presentat…	binding;enzyme binding;kinase binding;protein binding;protein kinase binding;protein transporter activity;substrate-specific transporter activity;transporter activity	AP-type membrane coat adaptor complex;cell part;clathrin adaptor complex;clathrin coated vesicle membrane;clathrin-coated endocytic vesicle membrane;coated vesicle membrane;cytoplasmic part;cytoplasmic vesicle membrane;cytoplasmic vesicle part;cytosol;endocytic vesicle membrane;Golgi apparatus part;Golgi membrane;intracellular organelle part;intracellular part;lysosomal membrane;macromolecular co…	Lysosome	0.612858	20.9891	1.62581	0.150846	0.36965	-5.47347	0.395443	20.9417	0.68847	0.509749	0.652335	-6.61406	-0.217415	21.2264	-0.314574	0.762927	0.881164	-6.56465	NPC.iPS	Neu.iPS	Neu.NPC
Q10570	Cleavage and polyadenylation specificity factor subunit 1	CPSF1	21.335	21.2107	21.6765	21.5953		21.2099				3	3.2	biosynthetic process;cellular biosynthetic process;cellular macromolecule biosynthetic process;cellular macromolecule metabolic process;cellular metabolic process;cellular nitrogen compound metabolic process;cellular process;establishment of localization;establishment of localization in cell;establishment of RNA localization;gene expression;intracellular transport;macromolecule biosynthetic proce…	binding;mRNA 3'-UTR binding;mRNA binding;nucleic acid binding;RNA binding	cell part;intracellular membrane-bounded organelle;intracellular organelle;intracellular organelle part;intracellular part;macromolecular complex;membrane-bounded organelle;mRNA cleavage and polyadenylation specificity factor complex;mRNA cleavage factor complex;nuclear part;nucleoplasm;nucleoplasm part;nucleus;organelle;organelle part;protein complex	mRNA surveillance pathway	-0.004815	21.4055	-0.0136939	0.989481	0.992854	-6.73201													NPC.iPS	Neu.iPS	Neu.NPC
Q10713	Mitochondrial-processing peptidase subunit alpha	PMPCA	25.0383	24.5879	24.7888	24.7873	23.8063	24.887	24.7894	24.2613	23.8543	5	11.2	cellular macromolecule metabolic process;cellular metabolic process;cellular process;cellular protein metabolic process;establishment of localization;establishment of localization in cell;establishment of protein localization;establishment of protein localization in mitochondrion;establishment of protein localization to organelle;intracellular protein transport;intracellular transport;macromolecu…	binding;catalytic activity;cation binding;endopeptidase activity;hydrolase activity;ion binding;metal ion binding;metalloendopeptidase activity;metallopeptidase activity;peptidase activity;peptidase activity, acting on L-amino acid peptides	cell part;cytoplasmic part;extracellular region part;extracellular space;intracellular membrane-bounded organelle;intracellular organelle;intracellular organelle lumen;intracellular organelle part;intracellular part;membrane;membrane-bounded organelle;membrane-enclosed lumen;mitochondrial inner membrane;mitochondrial matrix;mitochondrial membrane;mitochondrial part;mitochondrion;organelle;organel…		-0.311497	24.6493	-0.829926	0.431987	0.649683	-6.47348	-0.503327	24.5533	-1.41348	0.193539	0.329634	-5.87823	-0.19183	24.3976	-0.441852	0.671044	0.842256	-6.62247	NPC.iPS	Neu.iPS	Neu.NPC
A0A087X1A5;Q5JW30;O95793-2;O95793-3;O95793;Q5JW28	Double-stranded RNA-binding protein Staufen homolog 1	STAU1	22.4875	22.1947	21.3128		22.0999		22.5846	22.0176	23.0839	6	14.4	biological regulation;cellular localization;cellular macromolecule localization;cellular process;chemical homeostasis;homeostatic process;interaction with host;interspecies interaction between organisms;intracellular mRNA localization;localization;macromolecule localization;multi-organism process;positive regulation of biological process;positive regulation of reproductive process;positive regula…	binding;double-stranded RNA binding;nucleic acid binding;RNA binding	cell body;cell part;cell projection;cytoplasm;cytoplasmic part;cytoskeletal part;dendrite;endoplasmic reticulum;extracellular membrane-bounded organelle;extracellular organelle;extracellular region part;extracellular vesicular exosome;intracellular membrane-bounded organelle;intracellular non-membrane-bounded organelle;intracellular organelle;intracellular organelle part;intracellular part;macrom…		0.101557	22.0237	0.167676	0.872764	0.937909	-6.4851	0.56373	22.2802	1.2986	0.228649	0.371376	-6.01936	0.462173	22.4465	0.757241	0.480028	0.726521	-6.07757	NPC.iPS	Neu.iPS	Neu.NPC
Q12756;Q12756-3;Q12756-2;F8W8V9	Kinesin-like protein KIF1A;Kinesin-like protein	KIF1A	21.7823	21.9924	22.3727	21.3025	22.0763	21.8993	22.6753	22.007	21.8049	4	2.9	anterograde axon cargo transport;axon cargo transport;cellular component movement;cellular process;cytoskeleton-dependent intracellular transport;establishment of localization;establishment of localization in cell;intracellular transport;metabolic process;microtubule-based movement;microtubule-based process;microtubule-based transport;transport;vesicle-mediated transport	adenyl nucleotide binding;adenyl ribonucleotide binding;ATP binding;ATPase activity;binding;catalytic activity;hydrolase activity;hydrolase activity, acting on acid anhydrides;hydrolase activity, acting on acid anhydrides, in phosphorus-containing anhydrides;microtubule motor activity;motor activity;nucleoside-triphosphatase activity;nucleotide binding;plus-end-directed microtubule motor activity…	cell body;cell part;cell projection;cytoplasm;cytoskeletal part;intracellular organelle part;intracellular part;kinesin complex;macromolecular complex;microtubule;microtubule associated complex;neuron projection;neuronal cell body;organelle part;protein complex		-0.28978	21.9042	-0.859036	0.416707	0.637237	-6.44836	0.11327	22.1058	0.312959	0.761953	0.847537	-6.81537	0.40305	21.9609	1.03329	0.333598	0.605724	-6.17296	NPC.iPS	Neu.iPS	Neu.NPC
Q12765;Q12765-2;Q12765-3	Secernin-1	SCRN1	23.2667	22.9684	22.3166	24.7403	24.8045	25.3652	26.1459	26.0725	26.6241	13	43	cellular process;establishment of localization;establishment of localization in cell;exocytosis;secretion;secretion by cell;transport;vesicle-mediated transport	catalytic activity;dipeptidase activity;exopeptidase activity;hydrolase activity;peptidase activity;peptidase activity, acting on L-amino acid peptides	cell part;cytoplasm;intracellular membrane-bounded organelle;intracellular organelle;intracellular organelle part;intracellular part;membrane;membrane-bounded organelle;nuclear membrane;nuclear part;nucleus;organelle;organelle membrane;organelle part		2.11945	23.9103	5.84536	0.000474852	0.0159754	0.260565	3.43028	24.5657	9.31694	1.04512e-05	0.000471711	4.04431	1.31082	25.6254	3.73726	0.00641979	0.0730368	-2.36863	NPC.iPS	Neu.iPS	Neu.NPC
Q12788;J3KNP2	Transducin beta-like protein 3	TBL3	21.7376	21.9637	22.0221	23.3965	20.3969	23.0395	21.9359	22.2913		7	14.4	biological regulation;cell surface receptor linked signaling pathway;cellular macromolecule metabolic process;cellular metabolic process;cellular nitrogen compound metabolic process;cellular process;cellular response to stimulus;cGMP-mediated signaling;cyclic-nucleotide-mediated signaling;G-protein coupled receptor protein signaling pathway;G-protein signaling, coupled to cGMP nucleotide second m…	binding;molecular transducer activity;nucleic acid binding;receptor signaling protein activity;RNA binding;signal transducer activity;snoRNA binding	cell part;intracellular membrane-bounded organelle;intracellular non-membrane-bounded organelle;intracellular organelle;intracellular organelle part;intracellular part;macromolecular complex;membrane-bounded organelle;non-membrane-bounded organelle;nuclear part;nucleolar part;nucleolus;nucleus;organelle;organelle part;preribosome;protein complex;Pwp2p-containing subcomplex of 9S preribosome;ribon…	Ribosome biogenesis in eukaryotes	0.36979	22.0927	0.500365	0.631045	0.791646	-6.70444	0.205773	21.9901	0.56832	0.586672	0.71707	-6.58199	-0.164017	22.212	-0.181153	0.861758	0.936521	-6.60175	NPC.iPS	Neu.iPS	Neu.NPC
Q12789-3;Q12789	General transcription factor 3C polypeptide 1	GTF3C1			21.1032			20.7984	19.9237	20.0379	20.1087	3	2	5S class rRNA transcription from RNA polymerase III type 1 promoter;biosynthetic process;cellular biosynthetic process;cellular macromolecule biosynthetic process;cellular macromolecule metabolic process;cellular metabolic process;cellular nitrogen compound metabolic process;cellular process;gene expression;macromolecule biosynthetic process;macromolecule metabolic process;metabolic process;nitro…	binding;DNA binding;nucleic acid binding	cell part;intracellular membrane-bounded organelle;intracellular non-membrane-bounded organelle;intracellular organelle;intracellular organelle part;intracellular part;macromolecular complex;membrane;membrane-bounded organelle;non-membrane-bounded organelle;nuclear part;nucleolus;nucleoplasm;nucleoplasm part;nucleus;organelle;organelle part;protein complex;ribonucleoprotein complex;transcription …		-0.30472	20.9508	-0.45967	0.672364	0.818866	-6.17704	-1.07972	20.2934	-2.2833	0.0598963	0.143153	-4.38639	-0.775003	20.2172	-1.58544	0.168335	0.430901	-5.20788	NPC.iPS	Neu.iPS	Neu.NPC
F6WIT2;A6PVN5;Q15257-3;Q15257-2;Q15257;A6PVN9;C9IZ76;Q5T949;Q5T948;A6PVN8;A6PVN6	Serine/threonine-protein phosphatase 2A activator	PPP2R4	23.0656	23.1373	23.719	23.3915	23.0062	23.6976	23.461	22.3832	22.7426	7	38.9	biological regulation;cell cycle process;cellular component organization;cellular component organization at cellular level;cellular component organization or biogenesis;cellular component organization or biogenesis at cellular level;cellular macromolecule metabolic process;cellular metabolic process;cellular process;cellular protein metabolic process;cytoskeleton organization;macromolecule metabo…	adenyl nucleotide binding;adenyl ribonucleotide binding;ATP binding;binding;catalytic activity;cis-trans isomerase activity;enzyme activator activity;enzyme binding;enzyme regulator activity;identical protein binding;isomerase activity;nucleotide binding;peptidyl-prolyl cis-trans isomerase activity;phosphatase activator activity;phosphatase binding;phosphatase regulator activity;protein binding;p…	calcium channel complex;cation channel complex;cell part;cytoplasm;extracellular membrane-bounded organelle;extracellular organelle;extracellular region part;extracellular vesicular exosome;intracellular membrane-bounded organelle;intracellular organelle;intracellular organelle part;intracellular part;ion channel complex;macromolecular complex;membrane part;membrane-bounded organelle;membrane-bou…		0.05784	23.3362	0.172201	0.867796	0.935733	-6.82573	-0.445023	23.0848	-1.14126	0.285298	0.437073	-6.19945	-0.502863	23.1137	-1.25365	0.247595	0.520147	-5.93403	NPC.iPS	Neu.iPS	Neu.NPC
Q12792;Q12792-3;F8VS81;Q12792-4	Twinfilin-1	TWF1	21.1221	21.0691		23.3992	23.9787	23.5836	22.9397	21.3796	21.9461	8	29.7	biological regulation;cellular component organization;cellular component organization or biogenesis;maintenance of location;maintenance of protein location;negative regulation of actin filament polymerization;negative regulation of biological process;negative regulation of cellular component organization;negative regulation of cellular process;negative regulation of cytoskeleton organization;nega…	actin binding;actin monomer binding;adenyl nucleotide binding;adenyl ribonucleotide binding;ATP binding;binding;cytoskeletal protein binding;lipid binding;nucleotide binding;phosphatidylinositol binding;phosphatidylinositol-4,5-bisphosphate binding;phospholipid binding;protein binding;purine nucleotide binding;purine ribonucleoside triphosphate binding;purine ribonucleotide binding;ribonucleotide…	actin cytoskeleton;adherens junction;anchoring junction;cell junction;cell part;cell projection;cell-cell junction;cell-substrate adherens junction;cell-substrate junction;contractile fiber;cytoplasm;cytoplasmic part;cytoskeleton;filopodium;focal adhesion;intracellular;intracellular non-membrane-bounded organelle;intracellular organelle;intracellular part;myofibril;non-membrane-bounded organelle;…		2.55824	22.6305	7.32838	0.000216325	0.0101889	1.24618	0.992862	21.6913	1.94806	0.0902619	0.193997	-5.04883	-1.56538	22.8711	-3.39638	0.0103445	0.093403	-2.86106	NPC.iPS	Neu.iPS	Neu.NPC
Q12797;Q12797-10	Aspartyl/asparaginyl beta-hydroxylase	ASPH	20.9125	20.5024	21.153	21.1042		20.3422				7	16.2	activation of store-operated calcium channel activity;anatomical structure development;anatomical structure morphogenesis;appendage morphogenesis;biological regulation;calcium ion transmembrane transport;calcium ion transport;calcium-mediated signaling;cation transport;cellular macromolecule metabolic process;cellular metabolic process;cellular process;cellular protein metabolic process;cellular …	binding;calcium ion binding;catalytic activity;cation binding;electron carrier activity;ion binding;ion channel binding;metal ion binding;oxidoreductase activity;oxidoreductase activity, acting on paired donors, with incorporation or reduction of molecular oxygen;oxidoreductase activity, acting on paired donors, with incorporation or reduction of molecular oxygen, 2-oxoglutarate as one donor, and…	calcium channel complex;cation channel complex;cell cortex part;cell part;cortical endoplasmic reticulum;cytoplasmic part;endoplasmic reticulum;endoplasmic reticulum lumen;endoplasmic reticulum membrane;endoplasmic reticulum part;integral to endoplasmic reticulum membrane;integral to membrane;integral to organelle membrane;intracellular membrane-bounded organelle;intracellular organelle;intracell…		-0.13278	20.8029	-0.328125	0.753031	0.862963	-6.67145													NPC.iPS	Neu.iPS	Neu.NPC
Q12800-2;Q12800-3;Q12800-4;Q12800;C9JWL3;F8VWL0;F8VX55;Q9NZI7-4;Q9NZI7	Alpha-globin transcription factor CP2;Upstream-binding protein 1	TFCP2;UBP1	20.9193	20.7805	21.4634			20.1148	21.1973	21.1984		2	6.7	anatomical structure formation involved in morphogenesis;angiogenesis;biological regulation;biosynthetic process;cellular biosynthetic process;cellular macromolecule biosynthetic process;cellular macromolecule metabolic process;cellular metabolic process;cellular nitrogen compound metabolic process;cellular process;developmental process;macromolecule biosynthetic process;macromolecule metabolic p…	binding;DNA binding;nucleic acid binding;nucleic acid binding transcription factor activity;protein binding;protein binding transcription factor activity;protein C-terminus binding;sequence-specific DNA binding;sequence-specific DNA binding transcription factor activity;transcription cofactor activity;transcription corepressor activity;transcription factor binding transcription factor activity	cell part;cytoplasm;intracellular membrane-bounded organelle;intracellular organelle;intracellular organelle part;intracellular part;membrane-bounded organelle;nuclear part;nucleoplasm;nucleus;organelle;organelle part		-0.939647	20.8195	-1.87892	0.113125	0.312686	-4.93439	0.143458	21.1118	0.372569	0.71993	0.813517	-6.682	1.0831	20.8368	1.9068	0.121146	0.363902	-4.77239	NPC.iPS	Neu.iPS	Neu.NPC
Q12841-2;Q12841;C9J5G4	Follistatin-related protein 1	FSTL1	25.9167	25.5345	26.3882	24.4315	25.3849	23.3395			22.6972	2	12.5	biological regulation;BMP signaling pathway;cell surface receptor linked signaling pathway;cellular process;cellular response to stimulus;enzyme linked receptor protein signaling pathway;regulation of biological process;regulation of cellular process;response to external stimulus;response to extracellular stimulus;response to nutrient levels;response to starvation;response to stimulus;response to…	binding;calcium ion binding;carbohydrate binding;cation binding;glycosaminoglycan binding;heparin binding;ion binding;metal ion binding;pattern binding;polysaccharide binding	extracellular membrane-bounded organelle;extracellular organelle;extracellular region;extracellular region part;extracellular space;extracellular vesicular exosome;membrane-bounded organelle;membrane-bounded vesicle;organelle;vesicle		-1.56123	25.1659	-2.91995	0.0204999	0.124675	-3.66369	-3.24926	25.1342	-5.96895	0.000788147	0.00790505	0.0215351	-1.68804	23.9633	-1.95988	0.101997	0.331993	-4.73085	NPC.iPS	Neu.iPS	Neu.NPC
Q12874	Splicing factor 3A subunit 3	SF3A3	25.2672	25.1533	25.4848	25.2123	25.2776	25.1315	23.8948	23.8654	23.9933	14	44.7	cellular component assembly;cellular component assembly at cellular level;cellular component organization;cellular component organization at cellular level;cellular component organization or biogenesis;cellular component organization or biogenesis at cellular level;cellular macromolecular complex assembly;cellular macromolecular complex subunit organization;cellular macromolecule metabolic proces…	binding;cation binding;ion binding;metal ion binding;transition metal ion binding;zinc ion binding	catalytic step 2 spliceosome;cell part;intracellular organelle part;intracellular part;macromolecular complex;nuclear body;nuclear part;nuclear speck;nucleoplasm;nucleoplasm part;organelle part;ribonucleoprotein complex;spliceosomal complex	Spliceosome	-0.0946733	25.2544	-0.345748	0.738949	0.858453	-6.77591	-1.38396	24.6098	-4.63946	0.00147127	0.011826	-1.027	-1.28929	24.5625	-4.34985	0.00284227	0.0495818	-1.52367	NPC.iPS	Neu.iPS	Neu.NPC
P05388;F8VWS0;P05388-2;F8VU65;F8VPE8;G3V210;F8VW21;F8VQY6;F8VRK7;F8VZS0;Q8NHW5	60S acidic ribosomal protein P0;60S acidic ribosomal protein P0-like	RPLP0;RPLP0P6	27.8276	27.7513	28.1436	27.0673	26.5543	26.9271	26.3442	26.2691	26.2245	12	50.2	biosynthetic process;catabolic process;cellular biosynthetic process;cellular catabolic process;cellular component biogenesis;cellular component biogenesis at cellular level;cellular component disassembly;cellular component disassembly at cellular level;cellular component organization;cellular component organization at cellular level;cellular component organization or biogenesis;cellular componen…	binding;nucleic acid binding;RNA binding;structural constituent of ribosome;structural molecule activity	adherens junction;anchoring junction;cell junction;cell part;cell-substrate adherens junction;cell-substrate junction;cytoplasm;cytoplasmic part;cytosol;cytosolic large ribosomal subunit;extracellular membrane-bounded organelle;extracellular organelle;extracellular region part;extracellular vesicular exosome;focal adhesion;intracellular membrane-bounded organelle;intracellular non-membrane-bounde…	Ribosome	-1.05791	27.3785	-3.54522	0.00827989	0.0774813	-2.72904	-1.62822	27.0934	-5.39103	0.000556795	0.00653399	-0.0153354	-0.570307	26.5644	-1.8104	0.110267	0.343946	-5.21506	NPC.iPS	Neu.iPS	Neu.NPC
Q12888;Q12888-3;Q12888-2;A6NNK5	Tumor suppressor p53-binding protein 1	TP53BP1	23.2353	23.9179	21.6009	23.6586	24.2539	24.1489	25.2642	25.3105	25.5828	18	15.1	biological regulation;biosynthetic process;cellular biosynthetic process;cellular macromolecule biosynthetic process;cellular macromolecule metabolic process;cellular metabolic process;cellular nitrogen compound metabolic process;cellular process;cellular response to stimulus;cellular response to stress;DNA metabolic process;DNA recombination;DNA repair;double-strand break repair;double-strand br…	activating transcription factor binding;binding;damaged DNA binding;DNA binding;histone binding;methylated histone residue binding;nucleic acid binding;p53 binding;protein binding;protein binding transcription factor activity;RNA polymerase II activating transcription factor binding;RNA polymerase II transcription cofactor activity;RNA polymerase II transcription factor binding;RNA polymerase II …	cell part;chromosomal part;condensed chromosome kinetochore;cytoplasm;intracellular membrane-bounded organelle;intracellular non-membrane-bounded organelle;intracellular organelle;intracellular organelle part;intracellular part;kinetochore;macromolecular complex;membrane-bounded organelle;non-membrane-bounded organelle;nuclear part;nucleoplasm;nucleus;organelle;organelle part;protein complex;repl…		1.10243	23.4692	1.89997	0.0960803	0.286668	-5.1943	2.46782	24.1519	4.4051	0.00202563	0.0148731	-1.35974	1.36539	24.7031	4.13013	0.00378267	0.0574722	-1.82039	NPC.iPS	Neu.iPS	Neu.NPC
Q12904;Q12904-2	Aminoacyl tRNA synthase complex-interacting multifunctional protein 1;Endothelial monocyte-activating polypeptide 2	AIMP1	23.5505	23.5575	23.6632	23.1498	24.3175	22.48	22.3846	23.2601	22.877	4	19.6	alcohol metabolic process;amine metabolic process;amino acid activation;anatomical structure formation involved in morphogenesis;angiogenesis;apoptosis;biological adhesion;biological regulation;carbohydrate metabolic process;carboxylic acid metabolic process;cell adhesion;cell communication;cell death;cell migration;cell motility;cell-cell signaling;cellular amine metabolic process;cellular amino…	binding;cytokine activity;enzyme binding;GTPase binding;identical protein binding;nucleic acid binding;protein binding;protein dimerization activity;protein homodimerization activity;receptor binding;RNA binding;tRNA binding	aminoacyl-tRNA synthetase multienzyme complex;cell part;cell surface;cytoplasm;cytoplasmic membrane-bounded vesicle;cytoplasmic part;cytoplasmic vesicle;cytosol;endoplasmic reticulum;extracellular region part;extracellular space;Golgi apparatus;intracellular membrane-bounded organelle;intracellular organelle;intracellular part;macromolecular complex;membrane;membrane-bounded organelle;membrane-bo…		-0.27467	23.4531	-0.582764	0.577003	0.752404	-6.65638	-0.74985	23.2155	-2.21099	0.0564788	0.138657	-4.74273	-0.47518	23.0782	-0.907988	0.392094	0.661673	-6.29345	NPC.iPS	Neu.iPS	Neu.NPC
Q12905;B4DY09	Interleukin enhancer-binding factor 2	ILF2	26.9021	26.8185	27.2355	26.9079	25.2836	27.7077	26.6584	26.5029	25.9961	19	70	biological regulation;biosynthetic process;cellular biosynthetic process;cellular macromolecule biosynthetic process;cellular macromolecule metabolic process;cellular metabolic process;cellular nitrogen compound metabolic process;cellular process;immune response;immune system process;macromolecule biosynthetic process;macromolecule metabolic process;metabolic process;nitrogen compound metabolic p…	adenyl nucleotide binding;adenyl ribonucleotide binding;ATP binding;binding;catalytic activity;DNA binding;double-stranded RNA binding;nucleic acid binding;nucleotide binding;purine nucleotide binding;purine ribonucleoside triphosphate binding;purine ribonucleotide binding;ribonucleotide binding;RNA binding;transferase activity	cell part;cytoplasm;intracellular membrane-bounded organelle;intracellular non-membrane-bounded organelle;intracellular organelle;intracellular organelle part;intracellular part;macromolecular complex;membrane;membrane-bounded organelle;non-membrane-bounded organelle;nuclear part;nucleolus;nucleoplasm;nucleus;organelle;organelle part;ribonucleoprotein complex		-0.352317	26.8092	-0.598512	0.566981	0.745111	-6.64643	-0.59956	26.6856	-1.80309	0.107311	0.220541	-5.35089	-0.247243	26.5094	-0.40196	0.698911	0.853258	-6.64084	NPC.iPS	Neu.iPS	Neu.NPC
Q12906;Q12906-7;Q12906-5;Q12906-4;Q12906-2;Q12906-6;Q12906-3	Interleukin enhancer-binding factor 3	ILF3	27.3665	27.5315	27.1781	27.5276	27.7383	27.5213	26.8809	26.3739	26.6041	32	43.1	biological regulation;biosynthetic process;cellular biosynthetic process;cellular macromolecule biosynthetic process;cellular macromolecule metabolic process;cellular metabolic process;cellular nitrogen compound metabolic process;cellular process;cellular protein metabolic process;defense response;defense response to virus;immune effector process;immune system process;macromolecule biosynthetic p…	binding;DNA binding;double-stranded RNA binding;nucleic acid binding;RNA binding	cell part;cytoplasm;cytoplasmic part;intracellular membrane-bounded organelle;intracellular non-membrane-bounded organelle;intracellular organelle;intracellular organelle part;intracellular part;macromolecular complex;membrane;membrane-bounded organelle;mitochondrion;non-membrane-bounded organelle;nuclear part;nucleolus;nucleoplasm;nucleus;organelle;organelle part;ribonucleoprotein complex		0.237043	27.4772	0.852942	0.419873	0.637936	-6.45367	-0.739053	26.9892	-2.34916	0.0453342	0.120048	-4.5288	-0.976097	27.1077	-3.08274	0.0162669	0.118458	-3.32533	NPC.iPS	Neu.iPS	Neu.NPC
Q12931-2;Q12931;I3L0K7	Heat shock protein 75 kDa, mitochondrial	TRAP1	25.1756	25.0258	24.8763	24.4745	24.5336	24.3371	24.013	23.4241	23.1272	14	28.1	biological regulation;cellular macromolecule metabolic process;cellular metabolic process;cellular process;cellular protein metabolic process;chaperone-mediated protein folding;macromolecule metabolic process;metabolic process;posttranscriptional regulation of gene expression;primary metabolic process;protein folding;protein metabolic process;regulation of biological process;regulation of biosynt…	adenyl nucleotide binding;adenyl ribonucleotide binding;ATP binding;binding;cytokine receptor binding;enzyme binding;kinase binding;nucleotide binding;protein binding;protein kinase binding;purine nucleotide binding;purine ribonucleoside triphosphate binding;purine ribonucleotide binding;receptor binding;ribonucleotide binding;tumor necrosis factor receptor binding;tumor necrosis factor receptor …	cell part;cytoplasmic part;extracellular membrane-bounded organelle;extracellular organelle;extracellular region part;extracellular vesicular exosome;intracellular membrane-bounded organelle;intracellular organelle;intracellular organelle lumen;intracellular organelle part;intracellular part;lipid particle;membrane;membrane-bounded organelle;membrane-bounded vesicle;membrane-enclosed lumen;mitoch…		-0.577557	24.7371	-2.11217	0.0696165	0.238642	-4.88521	-1.50449	24.2737	-4.34976	0.00218706	0.0152316	-1.43948	-0.926937	23.9849	-2.6323	0.0317644	0.171966	-4.00326	NPC.iPS	Neu.iPS	Neu.NPC
A6PWM2;Q6UXH1-3;Q6UXH1-2;Q6UXH1-4;Q6UXH1;Q6UXH1-6;Q6UXH1-5	Cysteine-rich with EGF-like domain protein 2	CRELD2			20.3012		21.2998		19.1699	19.9518	21.2501	1	5.7		binding;calcium ion binding;cation binding;ion binding;metal ion binding	cell part;cytoplasmic part;endoplasmic reticulum;extracellular region part;extracellular space;Golgi apparatus;intracellular membrane-bounded organelle;intracellular organelle;intracellular part;membrane-bounded organelle;organelle		0.99866	20.8005	1.50648	0.214817	0.450886	-5.22677	-0.177237	20.1682	-0.21478	0.836633	0.898252	-6.50195	-1.1759	20.4179	-1.34074	0.232642	0.504952	-5.50061	NPC.iPS	Neu.iPS	Neu.NPC
Q12972;A0A0A0MT09;Q12972-2	Nuclear inhibitor of protein phosphatase 1;Activator of RNA decay	PPP1R8	21.1572	21.0844	21.2723	20.2967	23.4588	20.7422	21.8997	21.5441	21.4275	3	16	biological regulation;biosynthetic process;catabolic process;cell proliferation;cellular biosynthetic process;cellular catabolic process;cellular macromolecule biosynthetic process;cellular macromolecule catabolic process;cellular macromolecule metabolic process;cellular metabolic process;cellular nitrogen compound metabolic process;cellular process;macromolecule biosynthetic process;macromolecul…	binding;catalytic activity;DNA binding;endonuclease activity;enzyme inhibitor activity;enzyme regulator activity;hydrolase activity;hydrolase activity, acting on ester bonds;nuclease activity;nucleic acid binding;phosphatase inhibitor activity;phosphatase regulator activity;protein phosphatase inhibitor activity;protein phosphatase regulator activity;protein phosphatase type 1 regulator activity;…	cell part;cytoplasm;intracellular membrane-bounded organelle;intracellular organelle;intracellular organelle part;intracellular part;macromolecular complex;membrane-bounded organelle;nuclear body;nuclear part;nuclear speck;nucleoplasm;nucleoplasm part;nucleus;organelle;organelle part;ribonucleoprotein complex;spliceosomal complex		0.327923	21.3353	0.428045	0.680542	0.826122	-6.74097	0.452483	21.3975	1.46954	0.178172	0.311137	-5.8067	0.12456	21.5615	0.158569	0.87819	0.943063	-6.71611	NPC.iPS	Neu.iPS	Neu.NPC
Q12996	Cleavage stimulation factor subunit 3	CSTF3	21.7968	21.6569	22.5281	20.7769	20.5947	21.277	20.9673	21.8834	20.1332	4	8.1	biosynthetic process;cellular biosynthetic process;cellular macromolecule biosynthetic process;cellular macromolecule metabolic process;cellular metabolic process;cellular nitrogen compound metabolic process;cellular process;gene expression;macromolecule biosynthetic process;macromolecule metabolic process;metabolic process;mRNA 3'-end processing;mRNA cleavage;mRNA metabolic process;mRNA polyaden…	binding;mRNA binding;nucleic acid binding;RNA binding	cell part;intracellular membrane-bounded organelle;intracellular organelle;intracellular organelle part;intracellular part;membrane-bounded organelle;nuclear part;nucleoplasm;nucleus;organelle;organelle part	mRNA surveillance pathway	-1.11106	21.4384	-3.08627	0.0160332	0.107573	-3.41199	-0.9993	21.4943	-2.03817	0.0742631	0.169548	-5.00548	0.11176	20.9387	0.22609	0.827164	0.916692	-6.70167	NPC.iPS	Neu.iPS	Neu.NPC
Q13011;M0R248	Delta(3,5)-Delta(2,4)-dienoyl-CoA isomerase, mitochondrial	ECH1	24.5541	24.6275	24.6583	24.2397	23.8857	24.6554	25.1246	25.0327	25.1969	9	31.1	carboxylic acid catabolic process;carboxylic acid metabolic process;catabolic process;cellular catabolic process;cellular ketone metabolic process;cellular lipid catabolic process;cellular lipid metabolic process;cellular metabolic process;cellular process;fatty acid beta-oxidation;fatty acid catabolic process;fatty acid metabolic process;fatty acid oxidation;lipid catabolic process;lipid metabol…	binding;catalytic activity;isomerase activity;protein binding;receptor binding	cell part;cytoplasmic part;extracellular membrane-bounded organelle;extracellular organelle;extracellular region part;extracellular vesicular exosome;intracellular membrane-bounded organelle;intracellular organelle;intracellular part;membrane;membrane-bounded organelle;membrane-bounded vesicle;microbody;mitochondrion;organelle;peroxisome;vesicle	Peroxisome	-0.35303	24.4368	-1.14118	0.288626	0.523663	-6.1703	0.50478	24.8657	1.7284	0.120437	0.237136	-5.45693	0.85781	24.6892	2.54434	0.0362708	0.18732	-4.13604	NPC.iPS	Neu.iPS	Neu.NPC
Q13015	Protein AF1q	MLLT11	19.1531	19.8378					20.4135	19.3746	22.0179	2	33.3	biological regulation;positive regulation of apoptosis;positive regulation of biological process;positive regulation of biosynthetic process;positive regulation of cell death;positive regulation of cellular biosynthetic process;positive regulation of cellular component organization;positive regulation of cellular metabolic process;positive regulation of cellular process;positive regulation of gen…		cell part;intracellular								1.10652	20.1594	1.49828	0.175521	0.308114	-5.66306							NPC.iPS	Neu.iPS	Neu.NPC
S4R371;P05413;S4R3A2	Fatty acid-binding protein, heart	FABP3	20.9393	21.447	20.1212	21.2787	21.6083	21.193	25.4313	24.7081	26.6823	9	59.1	acylglycerol catabolic process;acylglycerol metabolic process;biological regulation;carboxylic acid metabolic process;catabolic process;cellular catabolic process;cellular component organization;cellular component organization or biogenesis;cellular ketone metabolic process;cellular lipid catabolic process;cellular lipid metabolic process;cellular metabolic process;cellular process;chemical homeo…	binding;carboxylic acid binding;cholesterol binding;cytoskeletal protein binding;fatty acid binding;fatty acid transporter activity;icosanoid binding;icosatetraenoic acid binding;lipid binding;lipid transporter activity;long-chain fatty acid transporter activity;monocarboxylic acid binding;oleic acid binding;protein binding;steroid binding;sterol binding;substrate-specific transporter activity;tr…	cell part;cytoplasm;cytoplasmic part;cytosol;extracellular membrane-bounded organelle;extracellular organelle;extracellular region part;extracellular space;extracellular vesicular exosome;intracellular part;membrane-bounded organelle;membrane-bounded vesicle;organelle;sarcoplasm;vesicle	PPAR signaling pathway	0.524113	21.0979	1.32541	0.22366	0.460018	-5.95915	4.77138	23.2216	8.5218	2.06997e-05	0.00074742	3.36335	4.24727	23.4836	8.14691	5.4963e-05	0.00683956	2.50113	NPC.iPS	Neu.iPS	Neu.NPC
Q13033-2;Q13033	Striatin-3	STRN3	20.758	21.2831				21.3247			21.9496	3	5.5	biological regulation;negative regulation of biological process;negative regulation of biosynthetic process;negative regulation of cell communication;negative regulation of cellular biosynthetic process;negative regulation of cellular macromolecule biosynthetic process;negative regulation of cellular metabolic process;negative regulation of cellular process;negative regulation of estrogen recepto…	armadillo repeat domain binding;binding;calmodulin binding;enzyme binding;nucleic acid binding transcription factor activity;phosphatase binding;protein binding;protein complex binding;protein domain specific binding;protein phosphatase 2A binding;protein phosphatase binding;sequence-specific DNA binding transcription factor activity	cell body;cell part;cell projection;cytoplasm;cytoplasmic part;dendrite;Golgi apparatus;intracellular membrane-bounded organelle;intracellular organelle;intracellular organelle part;intracellular part;macromolecular complex;membrane;membrane-bounded organelle;neuron projection;neuronal cell body;nuclear part;nucleoplasm;nucleus;organelle;organelle part;plasma membrane;protein complex		0.304115	21.1219	0.552766	0.606386	0.774845	-6.26811	0.929085	21.3302	1.61294	0.163477	0.292439	-5.24813	0.62497	21.6371	0.840563	0.454039	0.709324	-5.79947	NPC.iPS	Neu.iPS	Neu.NPC
Q13045-2;Q13045;Q13045-3	Protein flightless-1 homolog	FLII	22.0249	22.2098	21.9527	21.496	21.9952	21.5832	21.6291	21.6206	20.712	7	5.9	actin cytoskeleton organization;actin filament severing;actin filament-based process;biological regulation;biosynthetic process;cellular biosynthetic process;cellular component organization;cellular component organization at cellular level;cellular component organization or biogenesis;cellular component organization or biogenesis at cellular level;cellular macromolecule biosynthetic process;cellu…	actin binding;binding;cytoskeletal protein binding;protein binding	adherens junction;anchoring junction;cell junction;cell part;cell-substrate adherens junction;cell-substrate junction;cytoplasm;cytoplasmic part;cytoskeletal part;focal adhesion;intracellular organelle part;intracellular part;microtubule organizing center;nuclear part;nucleoplasm;organelle part		-0.370947	21.877	-1.27485	0.240117	0.476391	-6.01914	-0.741853	21.6915	-2.05183	0.0726797	0.166907	-4.98496	-0.370907	21.506	-0.96391	0.365102	0.631753	-6.24116	NPC.iPS	Neu.iPS	Neu.NPC
Q4TT38;Q13084	39S ribosomal protein L28, mitochondrial	MRPL28	19.6548									1	9.4	biosynthetic process;cellular biosynthetic process;cellular component disassembly;cellular component disassembly at cellular level;cellular component organization;cellular component organization at cellular level;cellular component organization or biogenesis;cellular component organization or biogenesis at cellular level;cellular macromolecular complex disassembly;cellular macromolecular complex …	structural constituent of ribosome;structural molecule activity	cell part;cytoplasm;cytoplasmic part;intracellular membrane-bounded organelle;intracellular non-membrane-bounded organelle;intracellular organelle;intracellular organelle part;intracellular part;macromolecular complex;membrane;membrane-bounded organelle;mitochondrial inner membrane;mitochondrial membrane;mitochondrial part;mitochondrial ribosome;mitochondrion;non-membrane-bounded organelle;nuclea…																				NPC.iPS	Neu.iPS	Neu.NPC
Q13085-3;Q13085-2;Q13085;Q13085-4;Q59FY4	Acetyl-CoA carboxylase 1;Biotin carboxylase	ACACA	23.7584	23.4229	24.636	22.6235	21.9446	23.0441	22.7031	22.7202		14	8.6	acetyl-CoA metabolic process;acyl-CoA biosynthetic process;acyl-CoA metabolic process;acylglycerol biosynthetic process;acylglycerol metabolic process;amine transport;amino acid transmembrane transport;amino acid transport;anatomical structure homeostasis;betaine transport;biological regulation;biosynthetic process;biotin metabolic process;carboxylic acid biosynthetic process;carboxylic acid meta…	acetyl-CoA carboxylase activity;adenyl nucleotide binding;adenyl ribonucleotide binding;ATP binding;binding;biotin carboxylase activity;catalytic activity;cation binding;CoA carboxylase activity;ion binding;ligase activity;ligase activity, forming carbon-carbon bonds;ligase activity, forming carbon-nitrogen bonds;metal ion binding;nucleotide binding;purine nucleotide binding;purine ribonucleoside…	actin cytoskeleton;cell part;cytoplasm;cytoplasmic part;cytoskeleton;cytosol;extracellular membrane-bounded organelle;extracellular organelle;extracellular region part;extracellular vesicular exosome;intracellular membrane-bounded organelle;intracellular non-membrane-bounded organelle;intracellular organelle;intracellular organelle part;intracellular part;membrane-bounded organelle;membrane-bound…	Fatty acid biosynthesis;Insulin signaling pathway;Propanoate metabolism;Pyruvate metabolism	-1.4017	23.2382	-3.19526	0.0136714	0.100169	-3.24804	-1.22747	23.4481	-2.69515	0.0293406	0.0903706	-3.94149	0.174223	22.6071	0.386675	0.711326	0.857743	-6.53654	NPC.iPS	Neu.iPS	Neu.NPC
Q13148;B1AKP7;G3V162;A0A087X260;A0A087WYY0;A0A087WX29;K7EJM5;A0A087WXQ5;A0A087WV68;K7EN94;Q13148-4	TAR DNA-binding protein 43	TARDBP	25.7445	25.7759	26.1159	26.0394	25.8532	25.9712	26.0197	26.3396	26.2564	10	35.5	3'-UTR-mediated mRNA stabilization;biological regulation;biosynthetic process;cellular biosynthetic process;cellular component organization;cellular component organization or biogenesis;cellular macromolecule biosynthetic process;cellular macromolecule metabolic process;cellular membrane organization;cellular metabolic process;cellular nitrogen compound metabolic process;cellular process;interact…	binding;DNA binding;double-stranded DNA binding;identical protein binding;mRNA 3'-UTR binding;mRNA binding;nucleic acid binding;nucleic acid binding transcription factor activity;nucleotide binding;protein binding;RNA binding;sequence-specific DNA binding transcription factor activity;structure-specific DNA binding	cell part;intracellular membrane-bounded organelle;intracellular organelle;intracellular organelle part;intracellular part;membrane-bounded organelle;nuclear part;nucleoplasm;nucleus;organelle;organelle part		0.0758333	25.9167	0.271399	0.793342	0.887142	-6.80126	0.326487	26.042	1.05991	0.318754	0.472115	-6.28594	0.250653	26.0799	0.823815	0.435429	0.694329	-6.36737	NPC.iPS	Neu.iPS	Neu.NPC
Q13151	Heterogeneous nuclear ribonucleoprotein A0	HNRNPA0	26.6113	26.4093	25.8523	26.7748	27.2544	26.4389	27.0046	26.9362	27.375	14	53.4	3'-UTR-mediated mRNA stabilization;biological regulation;cellular macromolecule metabolic process;cellular metabolic process;cellular nitrogen compound metabolic process;cellular process;defense response;gene expression;inflammatory response;macromolecule metabolic process;metabolic process;mRNA metabolic process;mRNA processing;mRNA stabilization;nitrogen compound metabolic process;nuclear mRNA …	AU-rich element binding;binding;enzyme binding;kinase binding;nucleic acid binding;nucleotide binding;protein binding;protein kinase binding;RNA binding	cell part;intracellular membrane-bounded organelle;intracellular organelle;intracellular organelle part;intracellular part;macromolecular complex;membrane-bounded organelle;nuclear part;nucleoplasm;nucleus;organelle;organelle part;ribonucleoprotein complex		0.531743	26.5568	1.49878	0.174446	0.403557	-5.74299	0.814313	26.6981	2.37876	0.0432467	0.116533	-4.48262	0.28257	26.964	0.796587	0.450141	0.707825	-6.39001	NPC.iPS	Neu.iPS	Neu.NPC
A6ZKI3;Q17RB0	Protein FAM127A;Protein FAM127C	FAM127A;FAM127C							21.5304	21.7253	21.8671	2	23.9																							NPC.iPS	Neu.iPS	Neu.NPC
Q13153;E9PM17;B3KNX7;Q13153-2;H0YCG5	Serine/threonine-protein kinase PAK 1;Non-specific serine/threonine protein kinase	PAK1	21.5774	21.462	21.0158			20.76	21.3511	20.9613	21.5107	4	9.7	actin cytoskeleton organization;actin cytoskeleton reorganization;actin filament-based process;activation of immune response;activation of innate immune response;activation of protein kinase activity;anatomical structure development;anatomical structure morphogenesis;antigen receptor-mediated signaling pathway;apoptosis;axon guidance;biological regulation;branching morphogenesis of a tube;cell de…	adenyl nucleotide binding;adenyl ribonucleotide binding;ATP binding;binding;catalytic activity;collagen binding;enzyme binding;GTPase binding;kinase activity;nucleotide binding;phosphotransferase activity, alcohol group as acceptor;protein binding;protein kinase activity;protein serine/threonine kinase activity;purine nucleotide binding;purine ribonucleoside triphosphate binding;purine ribonucleo…	adherens junction;anchoring junction;axon;cell junction;cell part;cell projection;cell projection membrane;cell projection part;cell-cell contact zone;cell-cell junction;cell-substrate adherens junction;cell-substrate junction;contractile fiber part;cytoplasm;cytoplasmic part;cytosol;dendrite;focal adhesion;Golgi apparatus;growth cone;intercalated disc;intracellular membrane-bounded organelle;int…	Axon guidance;Chemokine signaling pathway;Epithelial cell signaling in Helicobacter pylori infection;ErbB signaling pathway;Fc gamma R-mediated phagocytosis;Focal adhesion;MAPK signaling pathway;MAPK signaling pathway - yeast;Natural killer cell mediated cytotoxicity;Regulation of actin cytoskeleton;Renal cell carcinoma;T cell receptor signaling pathway	-0.591747	21.2038	-1.23432	0.266648	0.506417	-5.72677	-0.0773433	21.313	-0.232732	0.821549	0.887057	-6.83939	0.514403	21.1458	0.983806	0.366427	0.632187	-5.87947	NPC.iPS	Neu.iPS	Neu.NPC
Q13155;A8MU58;F8W950	Aminoacyl tRNA synthase complex-interacting multifunctional protein 2	AIMP2	22.2145	21.2589	24.0515	22.4266		24.0636	22.7547	23.8849	22.2925	5	26.6	amine metabolic process;amino acid activation;apoptosis;biological regulation;carboxylic acid metabolic process;cell death;cell differentiation;cellular amine metabolic process;cellular amino acid metabolic process;cellular developmental process;cellular ketone metabolic process;cellular macromolecule metabolic process;cellular metabolic process;cellular nitrogen compound metabolic process;cellul…		cell part;cytoplasmic part;cytosol;intracellular membrane-bounded organelle;intracellular organelle;intracellular part;membrane;membrane-bounded organelle;nucleus;organelle		0.73679	22.803	0.833779	0.433688	0.650532	-6.35697	0.469077	22.7429	0.656394	0.529165	0.668794	-6.63671	-0.267713	23.0845	-0.391504	0.707924	0.856121	-6.53446	NPC.iPS	Neu.iPS	Neu.NPC
Q13162;H7C3T4	Peroxiredoxin-4	PRDX4	24.153	24.4773	25.031	24.1378	23.6276	24.2761	23.6996	23.8811	24.0528	6	34.7	4-hydroxyproline metabolic process;amine metabolic process;anatomical structure development;biological regulation;carboxylic acid metabolic process;cell redox homeostasis;cellular amine metabolic process;cellular amino acid metabolic process;cellular component organization;cellular component organization at cellular level;cellular component organization or biogenesis;cellular component organizati…	antioxidant activity;catalytic activity;oxidoreductase activity;oxidoreductase activity, acting on paired donors, with incorporation or reduction of molecular oxygen;oxidoreductase activity, acting on peroxide as acceptor;peroxidase activity;peroxiredoxin activity;thioredoxin peroxidase activity	cell part;cytoplasmic part;cytosol;endoplasmic reticulum;extracellular membrane-bounded organelle;extracellular organelle;extracellular region part;extracellular space;extracellular vesicular exosome;intracellular membrane-bounded organelle;intracellular organelle;intracellular part;membrane-bounded organelle;membrane-bounded vesicle;mitochondrion;nucleus;organelle;smooth endoplasmic reticulum;ve…		-0.539923	24.2838	-1.5312	0.166401	0.39266	-5.70096	-0.675893	24.2158	-1.95068	0.0852288	0.186597	-5.13588	-0.13597	23.9458	-0.40563	0.696326	0.851804	-6.63922	NPC.iPS	Neu.iPS	Neu.NPC
P05455;E7ERC4	Lupus La protein	SSB	27.612	27.4501	27.2814	27.3212	27.8659	27.1577	26.6089	27.0651	27.1532	23	54.4	cellular macromolecule metabolic process;cellular metabolic process;cellular nitrogen compound metabolic process;cellular process;histone mRNA metabolic process;macromolecule metabolic process;macromolecule modification;metabolic process;mRNA metabolic process;ncRNA metabolic process;ncRNA processing;nitrogen compound metabolic process;nucleic acid metabolic process;nucleobase-containing compound…	binding;mRNA binding;nucleic acid binding;nucleotide binding;RNA binding;tRNA binding	cell part;intracellular membrane-bounded organelle;intracellular organelle;intracellular part;macromolecular complex;membrane-bounded organelle;nucleus;organelle;ribonucleoprotein complex	Systemic lupus erythematosus	0.000443333	27.4481	0.00141556	0.998907	0.999332	-6.84229	-0.50541	27.1951	-1.58502	0.149881	0.276116	-5.65437	-0.505853	27.1953	-1.42691	0.193839	0.461197	-5.72548	NPC.iPS	Neu.iPS	Neu.NPC
Q13177	Serine/threonine-protein kinase PAK 2;PAK-2p27;PAK-2p34	PAK2	24.249	23.1536	22.3508	24.7234	25.4685	24.0357	25.3578	25.0819	25.8439	15	41	actin cytoskeleton organization;actin filament-based process;activation of immune response;activation of innate immune response;activation of protein kinase activity;antigen receptor-mediated signaling pathway;apoptosis;axon guidance;biological regulation;cell death;cell migration;cell motility;cell surface receptor linked signaling pathway;cellular component disassembly;cellular component disass…	adenyl nucleotide binding;adenyl ribonucleotide binding;ATP binding;binding;catalytic activity;enzyme activator activity;enzyme binding;enzyme regulator activity;GTPase binding;identical protein binding;kinase activator activity;kinase activity;kinase binding;kinase regulator activity;nucleotide binding;phosphotransferase activity, alcohol group as acceptor;protein binding;protein kinase activato…	cell part;cytoplasm;cytoplasmic part;cytosol;intracellular organelle part;intracellular part;membrane;nuclear part;nucleoplasm;organelle part;perinuclear region of cytoplasm;plasma membrane	Axon guidance;ErbB signaling pathway;Focal adhesion;MAPK signaling pathway;Regulation of actin cytoskeleton;Renal cell carcinoma;T cell receptor signaling pathway	1.49143	23.9968	2.63835	0.0312687	0.156676	-4.09216	2.17672	24.3395	4.33813	0.00222275	0.0152985	-1.4563	0.68529	25.0852	1.51831	0.169858	0.433386	-5.60928	NPC.iPS	Neu.iPS	Neu.NPC
Q13185;S4R2Y4	Chromobox protein homolog 3	CBX3	26.6246	26.7518	26.5298	26.7192	27.0823	26.1898	25.6087	25.8657	26.1222	10	66.7	biological regulation;biosynthetic process;cellular biosynthetic process;cellular component organization;cellular component organization at cellular level;cellular component organization or biogenesis;cellular component organization or biogenesis at cellular level;cellular macromolecule biosynthetic process;cellular macromolecule metabolic process;cellular metabolic process;cellular nitrogen comp…	binding;enzyme binding;identical protein binding;protein binding;protein domain specific binding	cell part;centromeric heterochromatin;chromatin;chromosomal part;chromosome, centromeric region;condensed chromosome, centromeric region;cytoskeletal part;envelope;euchromatin;heterochromatin;intracellular membrane-bounded organelle;intracellular non-membrane-bounded organelle;intracellular organelle;intracellular organelle part;intracellular part;membrane;membrane-bounded organelle;non-membrane-…		0.0283867	26.6496	0.0868939	0.933011	0.966977	-6.83807	-0.769867	26.2505	-2.48195	0.0366943	0.10439	-4.32089	-0.798253	26.2647	-2.18405	0.0626607	0.248427	-4.67543	NPC.iPS	Neu.iPS	Neu.NPC
Q13200-3;Q13200;Q13200-2	26S proteasome non-ATPase regulatory subunit 2	PSMD2	26.0864	25.9919	26.5034	25.8041	24.8555	26.2667	25.8901	26.1578	25.276	18	31.9	activation of immune response;activation of innate immune response;anaphase-promoting complex-dependent proteasomal ubiquitin-dependent protein catabolic process;antigen processing and presentation;antigen processing and presentation of exogenous antigen;antigen processing and presentation of exogenous peptide antigen;antigen processing and presentation of exogenous peptide antigen via MHC class …	enzyme regulator activity	cell part;cytoplasmic part;cytosol;extracellular membrane-bounded organelle;extracellular organelle;extracellular region part;extracellular vesicular exosome;intracellular organelle part;intracellular part;macromolecular complex;membrane;membrane-bounded organelle;membrane-bounded vesicle;nuclear part;nucleoplasm;organelle;organelle part;proteasome accessory complex;proteasome complex;proteasome …	Proteasome	-0.55179	25.918	-1.32549	0.223634	0.460018	-5.95905	-0.419263	25.9843	-1.17174	0.273512	0.423997	-6.16584	0.132527	25.7084	0.286281	0.782402	0.892403	-6.6846	NPC.iPS	Neu.iPS	Neu.NPC
Q13217;X6R9L0	DnaJ homolog subfamily C member 3	DNAJC3	20.8562	22.0053	21.6926			22.121		21.355	21.8911	2	8.3	biological regulation;cellular macromolecule metabolic process;cellular metabolic process;cellular process;cellular protein metabolic process;cellular response to chemical stimulus;cellular response to organic substance;cellular response to stimulus;cellular response to stress;cellular response to topologically incorrect protein;cellular response to unfolded protein;defense response;defense respo…	enzyme inhibitor activity;enzyme regulator activity;kinase inhibitor activity;kinase regulator activity;protein kinase inhibitor activity;protein kinase regulator activity	cell part;cytoplasm;cytoplasmic part;endoplasmic reticulum;endoplasmic reticulum lumen;endoplasmic reticulum part;endoplasmic reticulum Sec complex;extracellular membrane-bounded organelle;extracellular organelle;extracellular region part;extracellular vesicular exosome;intracellular membrane-bounded organelle;intracellular organelle;intracellular organelle lumen;intracellular organelle part;intr…	Protein processing in endoplasmic reticulum	0.602913	21.6688	1.00933	0.354666	0.585395	-5.96272	0.105058	21.5601	0.226719	0.826789	0.891612	-6.73034	-0.497855	21.789	-0.817961	0.454417	0.709324	-5.96483	NPC.iPS	Neu.iPS	Neu.NPC
Q13228-2;Q13228-3;Q13228;Q13228-4	Selenium-binding protein 1	SELENBP1		20.6683	20.8282	20.7934	19.9362	20.6945		20.6274	20.0164	1	5.6	establishment of localization;establishment of protein localization;protein transport;transport	binding;selenium binding	cell part;cytoplasmic part;cytosol;extracellular membrane-bounded organelle;extracellular organelle;extracellular region part;extracellular space;extracellular vesicular exosome;intracellular non-membrane-bounded organelle;intracellular organelle;intracellular organelle part;intracellular part;membrane;membrane-bounded organelle;membrane-bounded vesicle;non-membrane-bounded organelle;nuclear part…		-0.273572	20.5841	-0.690678	0.513436	0.70959	-6.47062	-0.42633	20.5351	-0.96248	0.370819	0.5199	-6.17739	-0.152758	20.4136	-0.337899	0.746074	0.874567	-6.55616	NPC.iPS	Neu.iPS	Neu.NPC
Q13242;H0YIB4;S4R3G0	Serine/arginine-rich splicing factor 9	SRSF9	25.2751	25.404	24.4876	25.0111	25.8882	25.0434	24.4295	25.0911	25.3671	8	36.7	biological regulation;biosynthetic process;cellular biosynthetic process;cellular component assembly;cellular component assembly at cellular level;cellular component organization;cellular component organization at cellular level;cellular component organization or biogenesis;cellular component organization or biogenesis at cellular level;cellular macromolecular complex assembly;cellular macromolec…	binding;nucleic acid binding;nucleotide binding	cell part;intracellular non-membrane-bounded organelle;intracellular organelle;intracellular organelle part;intracellular part;non-membrane-bounded organelle;nuclear part;nucleolus;nucleoplasm;organelle;organelle part	Spliceosome	0.258723	25.1849	0.655046	0.531844	0.719374	-6.60874	-0.0929667	25.009	-0.23257	0.821671	0.887057	-6.83943	-0.35169	25.1384	-0.849841	0.421682	0.689148	-6.34514	NPC.iPS	Neu.iPS	Neu.NPC
Q13243;Q13243-3	Serine/arginine-rich splicing factor 5	SRSF5	23.5788	23.6813	22.7938	22.9887	24.3095	23.409	22.776	23.2782	23.5946	5	27.2	biological regulation;biosynthetic process;cellular biosynthetic process;cellular component assembly;cellular component assembly at cellular level;cellular component organization;cellular component organization at cellular level;cellular component organization or biogenesis;cellular component organization or biogenesis at cellular level;cellular macromolecular complex assembly;cellular macromolec…	binding;nucleic acid binding;nucleotide binding	cell part;cytoplasm;intracellular membrane-bounded organelle;intracellular non-membrane-bounded organelle;intracellular organelle;intracellular organelle part;intracellular part;membrane-bounded organelle;non-membrane-bounded organelle;nuclear body;nuclear part;nuclear speck;nucleolus;nucleoplasm;nucleoplasm part;nucleus;organelle;organelle part	Spliceosome	0.21775	23.4602	0.498463	0.632323	0.791646	-6.70547	-0.135027	23.2838	-0.350607	0.734527	0.825244	-6.80172	-0.352777	23.3927	-0.794366	0.451356	0.707879	-6.39183	NPC.iPS	Neu.iPS	Neu.NPC
A8MQ02;J3KN01;P55196-1;P55196;P55196-5;Q5TIG5;P55196-2;P55196-6;P55196-3	Afadin	MLLT4	22.2637	22.6129	22.3889	23.0142	22.65	22.2691	22.3768	22.1049	22.3594	8	5.7	adherens junction organization;biological adhesion;biological regulation;cell adhesion;cell communication;cell junction assembly;cell junction organization;cell-cell junction organization;cell-cell signaling;cellular component assembly;cellular component assembly at cellular level;cellular component organization;cellular component organization at cellular level;cellular component organization or …	binding;enzyme binding;GTPase binding;protein binding;protein C-terminus binding;Ras GTPase binding;small GTPase binding	adherens junction;anchoring junction;apical part of cell;cell junction;cell part;cell-cell adherens junction;cell-cell junction;cytoplasm;cytoplasmic part;cytosol;intracellular organelle part;intracellular part;membrane;nuclear part;nucleoplasm;organelle part;plasma membrane	Adherens junction;Leukocyte transendothelial migration;Tight junction	0.222583	22.5331	0.707376	0.500538	0.699243	-6.57117	-0.14146	22.3511	-0.465324	0.653544	0.766431	-6.75093	-0.364043	22.4624	-1.07414	0.316061	0.588652	-6.13115	NPC.iPS	Neu.iPS	Neu.NPC
Q13247-3;Q13247	Serine/arginine-rich splicing factor 6	SRSF6	26.2916	26.1684	26.1918	25.7347	26.7938	25.429	25.0041	26.559	26.4569	9	23	alternative nuclear mRNA splicing, via spliceosome;biological regulation;biosynthetic process;cellular biosynthetic process;cellular component assembly;cellular component assembly at cellular level;cellular component organization;cellular component organization at cellular level;cellular component organization or biogenesis;cellular component organization or biogenesis at cellular level;cellular …	binding;nucleic acid binding;nucleotide binding;pre-mRNA binding;RNA binding	cell part;intracellular organelle part;intracellular part;nuclear body;nuclear part;nuclear speck;nucleoplasm;nucleoplasm part;organelle part	Spliceosome	-0.231457	26.1015	-0.578288	0.579871	0.754056	-6.65916	-0.21059	26.112	-0.465455	0.653454	0.766431	-6.75086	0.0208667	25.9962	0.0373857	0.971152	0.989214	-6.72935	NPC.iPS	Neu.iPS	Neu.NPC
Q13257;Q13257-2	Mitotic spindle assembly checkpoint protein MAD2A	MAD2L1	21.9493	21.7048	22.6214	21.7522		21.3128	19.0931	19.4264		2	8.3	anaphase-promoting complex-dependent proteasomal ubiquitin-dependent protein catabolic process;biological regulation;catabolic process;cell cycle;cell cycle checkpoint;cell cycle process;cell division;cellular catabolic process;cellular component organization;cellular component organization at cellular level;cellular component organization or biogenesis;cellular component organization or biogenes…	binding;identical protein binding;protein binding;protein dimerization activity;protein homodimerization activity	cell part;chromosomal part;condensed chromosome kinetochore;cytoplasmic part;cytoskeletal part;cytosol;intracellular membrane-bounded organelle;intracellular non-membrane-bounded organelle;intracellular organelle;intracellular organelle part;intracellular part;kinetochore;macromolecular complex;membrane-bounded organelle;mitotic spindle;non-membrane-bounded organelle;nucleus;organelle;organelle p…	Cell cycle;Cell cycle - yeast;Meiosis - yeast;Oocyte meiosis;Progesterone-mediated oocyte maturation	-0.559323	21.8681	-1.36107	0.218357	0.453866	-5.80676	-2.83207	20.959	-6.75135	0.000208193	0.00344105	1.17372	-2.27274	20.3961	-5.03613	0.00302652	0.0509103	-1.22006	NPC.iPS	Neu.iPS	Neu.NPC
P05556;P05556-2;P05556-5;P05556-4;P05556-3	Integrin beta-1	ITGB1	23.5075	23.3749	24.5541	22.2767	21.7837	24.2176	23.6595	24.3625	22.6666	11	16.3	actin cytoskeleton organization;actin filament-based process;actomyosin structure organization;anatomical structure homeostasis;anatomical structure morphogenesis;associative learning;axon extension;axon guidance;B cell activation;B cell differentiation;behavior;biological adhesion;biological regulation;blood coagulation;blood vessel endothelial cell migration;calcium ion homeostasis;calcium-inde…	actin binding;binding;cation binding;cell adhesion molecule binding;cytoskeletal protein binding;enzyme binding;ion binding;metal ion binding;peptide binding;protease binding;protein binding;protein dimerization activity;protein heterodimerization activity;receptor activity;viral receptor activity	acrosomal vesicle;adherens junction;alpha1-beta1 integrin complex;alpha11-beta1 integrin complex;alpha1-beta1 integrin complex;alpha2-beta1 integrin complex;alpha3-beta1 integrin complex;alpha7-beta1 integrin complex;alpha8-beta1 integrin complex;alpha9-beta1 integrin complex;anchoring junction;basement membrane;cell division site part;cell junction;cell part;cell projection;cell projection membr…	Arrhythmogenic right ventricular cardiomyopathy (ARVC);Axon guidance;Bacterial invasion of epithelial cells;Cell adhesion molecules (CAMs);Dilated cardiomyopathy;ECM-receptor interaction;Focal adhesion;Hypertrophic cardiomyopathy (HCM);Leishmaniasis;Leukocyte transendothelial migration;Pathogenic Escherichia coli infection;Pathways in cancer;Phagosome;Regulation of actin cytoskeleton;Shigellosis;…	-1.05283	23.2858	-1.59743	0.150999	0.36965	-5.61363	-0.24933	23.6875	-0.483874	0.640858	0.757448	-6.74144	0.803497	23.1611	1.12618	0.294791	0.570914	-6.07618	NPC.iPS	Neu.iPS	Neu.NPC
Q13263;Q13263-2;M0R0K9	Transcription intermediary factor 1-beta	TRIM28	28.3244	28.3379	28.4744	28.0381	28.5081	27.7013	27.2995	27.8102	27.6316	31	55.2	anatomical structure morphogenesis;biological regulation;biosynthetic process;cell morphogenesis;cell morphogenesis involved in differentiation;cellular biosynthetic process;cellular component assembly;cellular component morphogenesis;cellular component organization;cellular component organization or biogenesis;cellular developmental process;cellular macromolecule metabolic process;cellular metab…	acid-amino acid ligase activity;binding;catalytic activity;cation binding;chromo shadow domain binding;DNA binding;enzyme binding;ion binding;kinase activity;Krueppel-associated box domain binding;ligase activity;ligase activity, forming carbon-nitrogen bonds;metal ion binding;nucleic acid binding;nucleic acid binding transcription factor activity;phosphotransferase activity, alcohol group as acc…	cell part;chromatin;chromosomal part;euchromatin;heterochromatin;intracellular;intracellular membrane-bounded organelle;intracellular organelle;intracellular organelle part;intracellular part;membrane-bounded organelle;nuclear chromatin;nuclear chromosome part;nuclear euchromatin;nuclear heterochromatin;nuclear part;nucleoplasm;nucleus;organelle;organelle part		-0.296427	28.2307	-0.941219	0.375669	0.605131	-6.37365	-0.798477	27.9797	-2.58332	0.0312299	0.0940905	-4.1611	-0.50205	27.8315	-1.40772	0.199241	0.466878	-5.74937	NPC.iPS	Neu.iPS	Neu.NPC
Q13283	Ras GTPase-activating protein-binding protein 1	G3BP1	26.4608	26.6596	25.9472	25.6085	26.3457	25.2004	23.5489	23.9738	24.448	12	26.8	biological regulation;cellular macromolecule metabolic process;cellular metabolic process;cellular nitrogen compound metabolic process;cellular process;cellular response to stimulus;DNA conformation change;DNA duplex unwinding;DNA geometric change;DNA metabolic process;establishment of localization;intracellular signal transduction;macromolecule metabolic process;metabolic process;negative regula…	adenyl nucleotide binding;adenyl ribonucleotide binding;ATP binding;ATPase activity;ATPase activity, coupled;ATP-dependent DNA helicase activity;ATP-dependent helicase activity;ATP-dependent RNA helicase activity;binding;catalytic activity;DNA binding;DNA helicase activity;DNA-dependent ATPase activity;endonuclease activity;helicase activity;hydrolase activity;hydrolase activity, acting on acid a…	adherens junction;anchoring junction;cell junction;cell part;cell-substrate adherens junction;cell-substrate junction;cytoplasm;cytoplasmic part;cytosol;focal adhesion;intracellular;intracellular membrane-bounded organelle;intracellular non-membrane-bounded organelle;intracellular organelle;intracellular part;macromolecular complex;membrane;membrane-bounded organelle;non-membrane-bounded organell…		-0.63768	26.0371	-1.63435	0.142993	0.358243	-5.56418	-2.36568	25.1731	-6.3819	0.000174026	0.00300529	1.19118	-1.728	24.8542	-4.05197	0.00419477	0.059448	-1.92769	NPC.iPS	Neu.iPS	Neu.NPC
Q13308-4;Q13308-2;Q13308;Q13308-6;Q13308-5;Q13308-3	Inactive tyrosine-protein kinase 7	PTK7	21.9195	20.9424	21.2785	22.3896	21.021	22.3319			19.6564	3	3.5	actin cytoskeleton organization;actin cytoskeleton reorganization;actin filament-based process;anatomical structure development;anatomical structure formation involved in morphogenesis;anatomical structure morphogenesis;axis elongation;biological adhesion;biological regulation;canonical Wnt receptor signaling pathway;cell adhesion;cell communication;cell differentiation;cell migration;cell motili…	adenyl nucleotide binding;adenyl ribonucleotide binding;ATP binding;binding;catalytic activity;kinase activity;nucleotide binding;phosphotransferase activity, alcohol group as acceptor;protein kinase activity;protein serine/threonine kinase activity;protein tyrosine kinase activity;purine nucleotide binding;purine ribonucleoside triphosphate binding;purine ribonucleotide binding;ribonucleotide bi…	adherens junction;anchoring junction;cell junction;cell part;cell-cell junction;cell-substrate adherens junction;cell-substrate junction;focal adhesion;integral to membrane;integral to plasma membrane;intrinsic to membrane;intrinsic to plasma membrane;membrane part;plasma membrane part		0.534013	21.6471	1.14359	0.287687	0.522832	-6.16768	-1.72373	20.9492	-3.03361	0.0212737	0.0709224	-3.34191	-2.25775	21.3497	-3.11667	0.0231481	0.143457	-3.23721	NPC.iPS	Neu.iPS	Neu.NPC
Q13322-3;Q13322-2;Q13322-4;Q13322	Growth factor receptor-bound protein 10	GRB10			19.208							1	3.7	biological regulation;cell surface receptor linked signaling pathway;cellular process;cellular response to chemical stimulus;cellular response to endogenous stimulus;cellular response to hormone stimulus;cellular response to insulin stimulus;cellular response to organic substance;cellular response to peptide hormone stimulus;cellular response to stimulus;enzyme linked receptor protein signaling p…	binding;binding, bridging;insulin receptor binding;protein binding;protein binding, bridging;protein complex binding;receptor binding;SH3/SH2 adaptor activity;signaling adaptor activity	cell part;cytoplasm;cytoplasmic part;cytosol;intracellular part;membrane;plasma membrane																				NPC.iPS	Neu.iPS	Neu.NPC
Q13325-2;Q13325	Interferon-induced protein with tetratricopeptide repeats 5	IFIT5				19.8413				20.7603		2	9.2	defense response;defense response to virus;immune effector process;immune response;immune system process;innate immune response;multi-organism process;response to biotic stimulus;response to other organism;response to stimulus;response to stress;response to virus	binding;nucleic acid binding;RNA binding;single-stranded RNA binding;tRNA binding	actin cytoskeleton;apical part of cell;cell part;cell projection membrane;cell projection part;cytoskeleton;intracellular non-membrane-bounded organelle;intracellular organelle;intracellular part;leading edge membrane;membrane part;non-membrane-bounded organelle;organelle;plasma membrane part;ruffle membrane														0.91902	20.3008	1.23605	0.29274	0.567634	-5.41944	NPC.iPS	Neu.iPS	Neu.NPC
Q13347	Eukaryotic translation initiation factor 3 subunit I	EIF3I	25.6593	25.524	25.8633	25.3827	25.5445	24.8433	24.1025	24.3481	24.3484	11	46.8	biological regulation;biosynthetic process;cellular biosynthetic process;cellular component assembly;cellular component assembly at cellular level;cellular component organization;cellular component organization at cellular level;cellular component organization or biogenesis;cellular component organization or biogenesis at cellular level;cellular macromolecular complex assembly;cellular macromolec…	binding;nucleic acid binding;RNA binding;translation factor activity, nucleic acid binding;translation initiation factor activity	cell part;cytoplasmic part;cytosol;eukaryotic 43S preinitiation complex;eukaryotic 48S preinitiation complex;eukaryotic translation initiation factor 3 complex;eukaryotic translation initiation factor 3 complex, eIF3m;extracellular membrane-bounded organelle;extracellular organelle;extracellular region part;extracellular vesicular exosome;intracellular part;macromolecular complex;membrane-bounded…	RNA transport	-0.425373	25.4695	-1.35926	0.213192	0.450411	-5.91817	-1.41589	24.9743	-4.67823	0.00139656	0.0115413	-0.972748	-0.99052	24.7616	-2.93859	0.0201081	0.13453	-3.54135	NPC.iPS	Neu.iPS	Neu.NPC
Q13363-2;Q13363;D6RAX2;E9PGB1;E7ESU7;E7EPF8;H0Y8W7	C-terminal-binding protein 1	CTBP1	22.2541	22.1756	22.1489	23.5682	24.3024	24.2243	24.9675	24.8696	24.1392	10	33.3	biological regulation;cell differentiation;cellular component organization;cellular component organization at cellular level;cellular component organization or biogenesis;cellular component organization or biogenesis at cellular level;cellular developmental process;cellular macromolecule metabolic process;cellular metabolic process;cellular process;cellular protein metabolic process;developmental…	binding;catalytic activity;coenzyme binding;cofactor binding;NAD binding;nucleic acid binding transcription factor activity;nucleotide binding;oxidoreductase activity;oxidoreductase activity, acting on CH-OH group of donors;oxidoreductase activity, acting on the CH-OH group of donors, NAD or NADP as acceptor;protein binding;protein binding transcription factor activity;protein C-terminus binding;…	cell part;cytoplasmic part;cytosol;intracellular membrane-bounded organelle;intracellular organelle;intracellular organelle part;intracellular part;macromolecular complex;membrane-bounded organelle;nuclear part;nucleoplasm;nucleoplasm part;nucleus;organelle;organelle part;protein complex;transcription factor complex;transcriptional repressor complex	Chronic myeloid leukemia;Notch signaling pathway;Pathways in cancer;Wnt signaling pathway	1.83878	23.1122	5.86741	0.000463658	0.0158248	0.285431	2.46592	23.4258	7.21501	7.18105e-05	0.00173752	2.10183	0.62714	24.3452	1.61199	0.148095	0.407434	-5.48633	NPC.iPS	Neu.iPS	Neu.NPC
Q13367-3;Q13367;Q13367-4	AP-3 complex subunit beta-2	AP3B2							20.9714			1	1	anterograde axon cargo transport;anterograde synaptic vesicle transport;axon cargo transport;cellular component movement;cellular process;cytoskeleton-dependent intracellular transport;establishment of localization;establishment of localization in cell;establishment of protein localization;Golgi vesicle transport;intracellular protein transport;intracellular transport;microtubule-based movement;m…	transporter activity	AP-3 adaptor complex;AP-type membrane coat adaptor complex;cell part;clathrin coated vesicle membrane;coated vesicle;coated vesicle membrane;COPI-coated vesicle;cytoplasm;cytoplasmic membrane-bounded vesicle;cytoplasmic part;cytoplasmic vesicle;cytoplasmic vesicle membrane;cytoplasmic vesicle part;Golgi apparatus;Golgi apparatus part;Golgi-associated vesicle;intracellular membrane-bounded organel…	Lysosome																			NPC.iPS	Neu.iPS	Neu.NPC
R9WNI0;A8MQB8;G3V0J0;Q06787-8;Q06787-6;Q06787-2;Q06787-4;Q06787-5;Q06787-9;Q06787-7;Q06787-3;Q06787;Q8IXW7;A0A087WXI3;G8JLE9	Fragile X mental retardation protein 1	FMR1	20.0303	20.4226	22.0316	22.4047	22.0074	22.1267	21.2588	21.6309	22.3331	2	4.2	anatomical structure development;biological regulation;central nervous system development;developmental process;establishment of localization;establishment of RNA localization;mRNA transport;negative regulation of biological process;negative regulation of biosynthetic process;negative regulation of cellular biosynthetic process;negative regulation of cellular macromolecule biosynthetic process;ne…	binding;mRNA binding;nucleic acid binding;RNA binding	cell body;cell part;cell projection;cell projection part;cytoplasm;cytoplasmic part;cytoskeletal part;dendritic shaft;dendritic spine;intracellular non-membrane-bounded organelle;intracellular organelle;intracellular organelle part;intracellular part;macromolecular complex;membrane;microtubule;mRNA cap binding complex;neuron projection;neuron spine;neuronal RNA granule;non-membrane-bounded organe…		1.35144	21.5039	2.57906	0.0342023	0.166075	-4.18241	0.912797	21.2845	1.63977	0.137939	0.263004	-5.58	-0.43864	21.9603	-1.14668	0.286736	0.562159	-6.05403	NPC.iPS	Neu.iPS	Neu.NPC
Q13404;I3L0A0;Q13404-8;Q13404-7;Q13404-2;Q13404-1;G3V2F7	Ubiquitin-conjugating enzyme E2 variant 1	UBE2V1;TMEM189-UBE2V1	23.8057	23.649	23.8259	23.8453	22.4215	23.2418	22.8521	22.0611	23.7074	2	14.3	activation of immune response;activation of innate immune response;antigen receptor-mediated signaling pathway;biological regulation;cell differentiation;cell surface receptor linked signaling pathway;cellular developmental process;cellular macromolecule metabolic process;cellular metabolic process;cellular nitrogen compound metabolic process;cellular process;cellular protein metabolic process;ce…	acid-amino acid ligase activity;binding;catalytic activity;enzyme binding;ligase activity;ligase activity, forming carbon-nitrogen bonds;protein binding;small conjugating protein ligase activity;ubiquitin protein ligase binding	cell part;cytoplasm;cytoplasmic part;cytosol;extracellular membrane-bounded organelle;extracellular organelle;extracellular region part;extracellular vesicular exosome;intracellular membrane-bounded organelle;intracellular organelle;intracellular part;macromolecular complex;membrane-bounded organelle;membrane-bounded vesicle;nucleus;organelle;protein complex;UBC13-UEV1A complex;ubiquitin conjugat…		-0.590687	23.4648	-1.47352	0.18096	0.413347	-5.77543	-0.886693	23.3168	-2.01821	0.0766392	0.173454	-5.03541	-0.296007	23.0215	-0.54299	0.602876	0.801754	-6.56861	NPC.iPS	Neu.iPS	Neu.NPC
P05783;F8VZY9	Keratin, type I cytoskeletal 18	KRT18	26.8859	27.4997	25.1121		19.3263	18.686	18.8912		19.852	14	37.2	anatomical structure morphogenesis;biological regulation;cell cycle;cell surface receptor linked signaling pathway;cellular component organization;cellular component organization at cellular level;cellular component organization or biogenesis;cellular component organization or biogenesis at cellular level;cellular process;cellular response to chemical stimulus;cellular response to cytokine stimul…	binding;protein binding;scaffold protein binding;structural molecule activity	cell part;cell periphery;centriolar satellite;cytoplasm;cytoplasmic part;cytoskeletal part;extracellular membrane-bounded organelle;extracellular organelle;extracellular region part;extracellular space;extracellular vesicular exosome;intermediate filament;intracellular non-membrane-bounded organelle;intracellular organelle;intracellular organelle part;intracellular part;keratin filament;macromole…		-7.49308	23.502	-10.434	2.50791e-05	0.00343145	3.32658	-7.12767	23.6482	-9.90516	1.58566e-05	0.000600249	3.71415	0.36541	19.1889	0.670447	0.529658	0.758299	-6.28114	NPC.iPS	Neu.iPS	Neu.NPC
Q13405;E9PI78;H0YDP7;E9PNF1	39S ribosomal protein L49, mitochondrial	MRPL49	21.5253	21.3854	21.4811	21.673	22.1799		20.67	21.3391		2	16.3	biosynthetic process;cellular biosynthetic process;cellular component disassembly;cellular component disassembly at cellular level;cellular component organization;cellular component organization at cellular level;cellular component organization or biogenesis;cellular component organization or biogenesis at cellular level;cellular macromolecular complex disassembly;cellular macromolecular complex …	structural constituent of ribosome;structural molecule activity	cell part;cytoplasmic part;intracellular non-membrane-bounded organelle;intracellular organelle;intracellular organelle part;intracellular part;large ribosomal subunit;macromolecular complex;membrane;mitochondrial inner membrane;mitochondrial large ribosomal subunit;mitochondrial membrane;mitochondrial part;mitochondrial ribosome;non-membrane-bounded organelle;organellar large ribosomal subunit;o…		0.462488	21.649	1.35184	0.221142	0.45834	-5.81784	-0.459402	21.2802	-1.2053	0.265276	0.416178	-6.01702	-0.92189	21.4655	-1.88177	0.113234	0.350254	-4.95868	NPC.iPS	Neu.iPS	Neu.NPC
Q13409-2;Q13409;Q13409-3;Q13409-7;Q13409-5;Q13409-6	Cytoplasmic dynein 1 intermediate chain 2	DYNC1I2	24.0574	23.9172	24.2408	25.2621	25.1615	24.7798	25.1624	24.681	25.5381	15	30.4	antigen processing and presentation;antigen processing and presentation of exogenous antigen;antigen processing and presentation of exogenous peptide antigen;antigen processing and presentation of exogenous peptide antigen via MHC class II;antigen processing and presentation of peptide antigen;antigen processing and presentation of peptide antigen via MHC class II;antigen processing and presentat…	binding;catalytic activity;cytoskeletal protein binding;hydrolase activity;hydrolase activity, acting on acid anhydrides;hydrolase activity, acting on acid anhydrides, in phosphorus-containing anhydrides;microtubule binding;microtubule motor activity;motor activity;nucleoside-triphosphatase activity;protein binding;pyrophosphatase activity;spectrin binding;tubulin binding	cell part;centrosome;chromosomal part;condensed chromosome kinetochore;cytoplasm;cytoplasmic dynein complex;cytoplasmic part;cytoskeletal part;cytosol;dynein complex;endosome;intracellular membrane-bounded organelle;intracellular non-membrane-bounded organelle;intracellular organelle;intracellular organelle part;intracellular part;kinetochore;macromolecular complex;membrane-bounded organelle;micr…	Phagosome;Vasopressin-regulated water reabsorption	0.996013	24.5698	3.41452	0.00996643	0.0875782	-2.92139	1.0554	24.5995	3.08168	0.0142453	0.052944	-3.37124	0.05939	25.0975	0.16448	0.873694	0.942102	-6.71504	NPC.iPS	Neu.iPS	Neu.NPC
Q13423;E9PCX7	NAD(P) transhydrogenase, mitochondrial	NNT		21.5155	20.5334	22.1065	21.184	22.2482	24.9134	23.2497	23.4093	13	16	acetyl-CoA catabolic process;acetyl-CoA metabolic process;biological regulation;catabolic process;cation transport;cell redox homeostasis;cellular catabolic process;cellular homeostasis;cellular metabolic process;cellular process;coenzyme catabolic process;coenzyme metabolic process;cofactor catabolic process;cofactor metabolic process;establishment of localization;homeostatic process;hydrogen tr…	binding;catalytic activity;cation transmembrane transporter activity;coenzyme binding;cofactor binding;hydrogen ion transmembrane transporter activity;inorganic cation transmembrane transporter activity;ion transmembrane transporter activity;monovalent inorganic cation transmembrane transporter activity;NAD binding;NAD(P)+ transhydrogenase (AB-specific) activity;NAD(P)+ transhydrogenase (B-specif…	cell part;cytoplasmic part;integral to membrane;intracellular membrane-bounded organelle;intracellular organelle;intracellular organelle part;intracellular part;intrinsic to membrane;membrane;membrane part;membrane-bounded organelle;mitochondrial inner membrane;mitochondrial membrane;mitochondrial membrane part;mitochondrial part;mitochondrial respiratory chain;mitochondrion;organelle;organelle i…	Nicotinate and nicotinamide metabolism	0.821807	21.5175	1.65888	0.143936	0.358877	-5.42997	2.83299	22.7242	4.6995	0.00191258	0.0144335	-1.11864	2.01119	22.8518	3.70271	0.00673286	0.0744225	-2.41789	NPC.iPS	Neu.iPS	Neu.NPC
Q13428-2;Q13428-8;Q13428;Q13428-3;Q13428-4;J3KQ96;E7ETY2;Q13428-6;Q13428-7;Q13428-5	Treacle protein	TCOF1	22.0233	23.5973		22.0296	21.6944	22.2471	21.6328	21.9643	22.7246	5	5	anatomical structure development;biosynthetic process;cellular biosynthetic process;cellular macromolecule biosynthetic process;cellular macromolecule metabolic process;cellular metabolic process;cellular nitrogen compound metabolic process;cellular process;developmental process;macromolecule biosynthetic process;macromolecule metabolic process;metabolic process;nitrogen compound metabolic proces…	transporter activity	cell part;cytoplasm;intracellular membrane-bounded organelle;intracellular non-membrane-bounded organelle;intracellular organelle;intracellular organelle part;intracellular part;membrane-bounded organelle;non-membrane-bounded organelle;nuclear part;nucleolus;nucleus;organelle;organelle part	Ribosome biogenesis in eukaryotes	-0.819927	22.3183	-1.55973	0.165599	0.391552	-5.55925	-0.703053	22.3885	-1.22514	0.258146	0.409095	-5.99456	0.116873	22.0488	0.296375	0.774975	0.890711	-6.68135	NPC.iPS	Neu.iPS	Neu.NPC
Q13442	28 kDa heat- and acid-stable phosphoprotein	PDAP1	23.0105	23.7678	23.7347	23.9826	24.7453	23.1941	23.7526	23.5354	24.0057	5	24.9	biological regulation;cell proliferation;cellular process;cellular response to stimulus;regulation of biological process;regulation of cellular process;response to stimulus;signal transduction				0.469683	23.7392	1.03148	0.334157	0.564924	-6.28548	0.260237	23.6344	0.746	0.476055	0.62083	-6.57104	-0.209447	23.8693	-0.465127	0.655031	0.83113	-6.611	NPC.iPS	Neu.iPS	Neu.NPC
Q13492-4;Q13492-3;Q13492-2;Q13492-5;Q13492;E9PKP6;E9PI56;E9PLJ8	Phosphatidylinositol-binding clathrin assembly protein	PICALM	20.2333			20.5766	21.3419	20.9551				2	9.6	anatomical structure development;anatomical structure morphogenesis;axonogenesis;biological regulation;cargo loading into vesicle;cation homeostasis;cell part morphogenesis;cell projection morphogenesis;cell projection organization;cell proliferation;cellular component assembly;cellular component assembly at cellular level;cellular component morphogenesis;cellular component organization;cellular …	1-phosphatidylinositol binding;binding;binding, bridging;clathrin adaptor activity;clathrin binding;clathrin heavy chain binding;lipid binding;phosphatidylinositol binding;phospholipid binding;protein binding;protein binding, bridging	cell body;cell part;clathrin-coated vesicle;coated pit;coated vesicle;cytoplasmic membrane-bounded vesicle;cytoplasmic part;cytoplasmic vesicle;Golgi apparatus;intracellular membrane-bounded organelle;intracellular organelle;intracellular part;membrane;membrane part;membrane-bounded organelle;membrane-bounded vesicle;neuronal cell body;nucleus;organelle;perinuclear region of cytoplasm;postsynapti…		0.72461	20.7767	1.42701	0.20719	0.441969	-5.50413													NPC.iPS	Neu.iPS	Neu.NPC
Q13509;Q13509-2	Tubulin beta-3 chain	TUBB3	25.6573	25.5774	24.7036	27.2412	26.7052	27.4802	30.1999	29.7198	29.7929	16	48.9	axon guidance;cell cycle phase;cell cycle process;cellular component assembly;cellular component assembly at cellular level;cellular component organization;cellular component organization at cellular level;cellular component organization or biogenesis;cellular component organization or biogenesis at cellular level;cellular macromolecular complex assembly;cellular macromolecular complex subunit or…	binding;catalytic activity;GTP binding;GTPase activity;guanyl nucleotide binding;guanyl ribonucleotide binding;hydrolase activity;hydrolase activity, acting on acid anhydrides;hydrolase activity, acting on acid anhydrides, in phosphorus-containing anhydrides;nucleoside-triphosphatase activity;nucleotide binding;peptide binding;purine nucleotide binding;purine ribonucleoside triphosphate binding;p…	axon;cell body;cell part;cell periphery;cell projection;cytoplasm;cytoskeletal part;dendrite;extracellular membrane-bounded organelle;extracellular organelle;extracellular region part;extracellular vesicular exosome;intracellular membrane-bounded organelle;intracellular organelle;intracellular organelle part;intracellular part;macromolecular complex;membrane-bounded organelle;membrane-bounded ves…	Gap junction;Pathogenic Escherichia coli infection;Phagosome	1.82945	26.2275	4.78587	0.00161222	0.0319058	-1.01828	4.59143	27.6085	12.3199	1.16115e-06	0.000112671	6.15176	2.76198	28.5232	7.78219	7.50306e-05	0.00706788	2.19386	NPC.iPS	Neu.iPS	Neu.NPC
Q13526;K7EN45;K7EMU7	Peptidyl-prolyl cis-trans isomerase NIMA-interacting 1	PIN1	22.3821	22.2582		22.8928	23.4736	22.7515	23.7842	22.7719	23.689	6	50.9	biological regulation;cell cycle;cell surface receptor linked signaling pathway;cellular macromolecule metabolic process;cellular metabolic process;cellular process;cellular protein metabolic process;cellular response to chemical stimulus;cellular response to cytokine stimulus;cellular response to organic substance;cellular response to stimulus;cytokine-mediated signaling pathway;defense response…	amine binding;amino acid binding;binding;carboxylic acid binding;catalytic activity;cis-trans isomerase activity;enzyme binding;GTPase activating protein binding;isomerase activity;kinase binding;mitogen-activated protein kinase kinase binding;peptidyl-prolyl cis-trans isomerase activity;phosphoprotein binding;phosphoserine binding;phosphothreonine binding;protein binding;protein kinase binding;p…	cell part;cytoplasm;intracellular membrane-bounded organelle;intracellular organelle;intracellular organelle part;intracellular part;membrane-bounded organelle;midbody;nuclear body;nuclear part;nuclear speck;nucleoplasm;nucleoplasm part;nucleus;organelle;organelle part	RIG-I-like receptor signaling pathway	0.71915	22.7516	1.9388	0.096446	0.286767	-5.04976	1.09488	22.9771	2.51021	0.0386855	0.107673	-4.21938	0.375727	23.2272	0.917777	0.387266	0.658492	-6.28447	NPC.iPS	Neu.iPS	Neu.NPC
Q13541	Eukaryotic translation initiation factor 4E-binding protein 1	EIF4EBP1	20.4573	20.2951			20.8378	19.1102	18.6638	18.5281		1	10.2	anatomical structure development;biological regulation;biosynthetic process;cap-independent translational initiation;cell cycle process;cell surface receptor linked signaling pathway;cellular biosynthetic process;cellular macromolecule biosynthetic process;cellular macromolecule metabolic process;cellular metabolic process;cellular process;cellular protein metabolic process;cellular response to c…	binding;eukaryotic initiation factor 4E binding;protein binding;translation initiation factor binding;translation regulator activity;translation repressor activity	cell part;cytoplasm;cytoplasmic part;cytosol;intracellular organelle part;intracellular part;macromolecular complex;nuclear part;nucleoplasm;organelle part;protein complex	Acute myeloid leukemia;ErbB signaling pathway;Insulin signaling pathway;mTOR signaling pathway;RNA transport	-0.40227	20.1751	-0.62727	0.555322	0.736297	-6.42197	-1.78031	19.4861	-4.33725	0.0042256	0.0230591	-1.7677	-1.37803	19.2849	-2.05739	0.0895512	0.309681	-4.72735	NPC.iPS	Neu.iPS	Neu.NPC
A8MRB1;P04271	Protein S100-B	S100B						18.9608	20.7522	18.5615	21.6938	1	16	anatomical structure development;anatomical structure morphogenesis;astrocyte differentiation;axonogenesis;behavior;biological regulation;cell differentiation;cell part morphogenesis;cell projection morphogenesis;cell projection organization;cell proliferation;cellular component morphogenesis;cellular component organization;cellular component organization at cellular level;cellular component orga…	binding;calcium ion binding;calcium-dependent protein binding;cation binding;cytoskeletal protein binding;identical protein binding;ion binding;metal ion binding;protein binding;protein dimerization activity;protein homodimerization activity;RAGE receptor binding;receptor binding;tau protein binding;transition metal ion binding;zinc ion binding	cell body;cell part;cell projection;cytoplasm;cytoplasmic part;extracellular region;extracellular region part;extracellular space;intracellular membrane-bounded organelle;intracellular organelle;intracellular part;membrane-bounded organelle;neuronal cell body;nucleus;organelle;perinuclear region of cytoplasm;ruffle														1.37497	19.9921	1.12827	0.305934	0.581027	-5.73459	NPC.iPS	Neu.iPS	Neu.NPC
P06132;H0Y5R6;Q5T446	Uroporphyrinogen decarboxylase	UROD	22.7337	22.9916	22.5771	22.264	21.8015	21.5133	21.0717	21.7571	20.9015	4	19.1	biosynthetic process;cellular aromatic compound metabolic process;cellular biosynthetic process;cellular metabolic process;cellular nitrogen compound biosynthetic process;cellular nitrogen compound metabolic process;cellular process;cofactor biosynthetic process;cofactor metabolic process;heme biosynthetic process;heme metabolic process;heterocycle biosynthetic process;heterocycle metabolic proce…	carbon-carbon lyase activity;carboxy-lyase activity;catalytic activity;lyase activity;uroporphyrinogen decarboxylase activity	cell part;cytoplasm;cytoplasmic part;cytosol;intracellular organelle part;intracellular part;nuclear part;nucleoplasm;organelle part	Porphyrin and chlorophyll metabolism	-0.90784	22.3135	-2.84216	0.0230198	0.134187	-3.78189	-1.52401	22.0055	-4.33953	0.0022184	0.0152985	-1.45427	-0.616173	21.5515	-1.6017	0.150354	0.4091	-5.50001	NPC.iPS	Neu.iPS	Neu.NPC
Q13542	Eukaryotic translation initiation factor 4E-binding protein 2	EIF4EBP2	22.4779	19.9369	20.7766	21.4208	18.2128		21.7521	20.2073	21.9775	2	37.5	behavior;behavioral interaction between organisms;biological regulation;biosynthetic process;cAMP-mediated signaling;cell surface receptor linked signaling pathway;cellular biosynthetic process;cellular macromolecule biosynthetic process;cellular macromolecule metabolic process;cellular metabolic process;cellular process;cellular protein metabolic process;cellular response to chemical stimulus;ce…	binding;eukaryotic initiation factor 4E binding;protein binding;translation initiation factor binding;translation regulator activity;translation repressor activity	cell part;cytoplasm;intracellular part		-1.24703	20.565	-1.14893	0.290714	0.525427	-6.04968	0.24847	21.188	0.352158	0.733406	0.824514	-6.80112	1.4955	20.7141	1.48021	0.185522	0.453416	-5.55292	NPC.iPS	Neu.iPS	Neu.NPC
Q13554-7;Q13554-4;Q13554-3;Q13554-8;Q13554-5;Q13554-2;Q13554	Calcium/calmodulin-dependent protein kinase type II subunit beta	CAMK2B							21.3943	20.6846	21.3198	1	2	activation of meiosis involved in egg activation;biological regulation;calcium ion transport;cation transport;cell communication;cell cycle process;cell surface receptor linked signaling pathway;cell-cell signaling;cellular macromolecule metabolic process;cellular metabolic process;cellular process;cellular protein metabolic process;cellular response to chemical stimulus;cellular response to cyto…	adenyl nucleotide binding;adenyl ribonucleotide binding;ATP binding;binding;calmodulin-dependent protein kinase activity;catalytic activity;identical protein binding;kinase activity;nucleotide binding;phosphotransferase activity, alcohol group as acceptor;protein binding;protein dimerization activity;protein homodimerization activity;protein kinase activity;protein serine/threonine kinase activit…	cell part;cytoplasmic part;cytoplasmic vesicle membrane;cytoplasmic vesicle part;cytoskeletal part;cytosol;endocytic vesicle membrane;endoplasmic reticulum membrane;endoplasmic reticulum part;intracellular organelle part;intracellular part;membrane;membrane part;microtubule organizing center;nuclear part;nucleoplasm;organelle membrane;organelle part;plasma membrane;sarcoplasmic reticulum membrane…	Calcium signaling pathway;ErbB signaling pathway;Gastric acid secretion;Glioma;GnRH signaling pathway;ko5152;Long-term potentiation;Melanogenesis;Neurotrophin signaling pathway;Olfactory transduction;Oocyte meiosis;Phototransduction - fly;Wnt signaling pathway																			NPC.iPS	Neu.iPS	Neu.NPC
Q13561;Q13561-3;Q13561-2;F8W1I6;F8VW18;H0YI98	Dynactin subunit 2	DCTN2	24.871	24.4774	23.8535	26.1954	26.6017	25.1394	26.4114	26.1399	26.7869	14	41.4	antigen processing and presentation;antigen processing and presentation of exogenous antigen;antigen processing and presentation of exogenous peptide antigen;antigen processing and presentation of exogenous peptide antigen via MHC class II;antigen processing and presentation of peptide antigen;antigen processing and presentation of peptide antigen via MHC class II;antigen processing and presentat…	binding;catalytic activity;cytoskeletal protein binding;hydrolase activity;hydrolase activity, acting on acid anhydrides;hydrolase activity, acting on acid anhydrides, in phosphorus-containing anhydrides;motor activity;nucleoside-triphosphatase activity;protein binding;pyrophosphatase activity;spectrin binding	cell part;cell projection part;centrosome;chromosomal part;cytoplasm;cytoplasmic part;cytoskeletal part;cytosol;dynactin complex;dynein complex;extracellular membrane-bounded organelle;extracellular organelle;extracellular region part;extracellular vesicular exosome;growth cone;intracellular non-membrane-bounded organelle;intracellular organelle;intracellular organelle part;intracellular part;kin…	Huntington's disease;Vasopressin-regulated water reabsorption	1.57823	25.1897	3.397	0.0102189	0.0891317	-2.94731	2.04549	25.4233	5.42068	0.000536734	0.00642711	0.02284	0.467257	26.2125	1.02941	0.3353	0.607876	-6.17687	NPC.iPS	Neu.iPS	Neu.NPC
Q13564-2;Q13564;Q13564-3;Q13564-4	NEDD8-activating enzyme E1 regulatory subunit	NAE1	23.2826	23.2396	23.467	22.6323	21.7217	23.7284	23.1097	23.1353	22.064	7	22.5	apoptosis;biological regulation;cell cycle checkpoint;cell death;cellular macromolecule metabolic process;cellular metabolic process;cellular process;cellular protein metabolic process;cellular response to stimulus;death;DNA integrity checkpoint;DNA replication checkpoint;macromolecule metabolic process;macromolecule modification;metabolic process;mitotic cell cycle checkpoint;mitotic cell cycle …	binding;catalytic activity;enzyme binding;NEDD8 activating enzyme activity;protein binding;protein dimerization activity;protein heterodimerization activity;small protein activating enzyme activity;ubiquitin protein ligase binding	cell part;cytoplasm;cytoplasmic part;cytosol;intracellular membrane-bounded organelle;intracellular organelle;intracellular part;membrane;membrane-bounded organelle;nucleus;organelle;plasma membrane	Alzheimer's disease	-0.63561	23.0119	-1.27243	0.240933	0.477205	-6.02198	-0.560063	23.0497	-1.46837	0.178481	0.311446	-5.80821	0.0755467	22.7319	0.131168	0.899088	0.954175	-6.72053	NPC.iPS	Neu.iPS	Neu.NPC
Q13572;G3V588;G3V5A3;G3V4M9;Q13572-2	Inositol-tetrakisphosphate 1-kinase	ITPK1	22.014	21.9029	22.362				20.8955	21.0701		2	8.2	biological regulation;blood coagulation;cellular metabolic process;cellular process;cellular response to stimulus;coagulation;dephosphorylation;hemostasis;inositol phosphate metabolic process;inositol trisphosphate metabolic process;metabolic process;multicellular organismal process;organophosphate metabolic process;phosphate-containing compound metabolic process;phosphorus metabolic process;regu…	adenyl nucleotide binding;adenyl ribonucleotide binding;ATP binding;binding;catalytic activity;cation binding;inositol or phosphatidylinositol kinase activity;inositol tetrakisphosphate 1-kinase activity;inositol tetrakisphosphate kinase activity;inositol trisphosphate kinase activity;inositol-1,3,4-trisphosphate 5-kinase activity;inositol-1,3,4-trisphosphate 6-kinase activity;ion binding;isomera…	cell part;cytoplasmic part;cytosol;intracellular;intracellular part	Inositol phosphate metabolism;Phosphatidylinositol signaling system							-1.11016	21.6489	-3.03796	0.0177126	0.062233	-3.42812							NPC.iPS	Neu.iPS	Neu.NPC
Q13596-2;Q13596;H0YK42;Q13596-3	Sorting nexin-1	SNX1			21.5053		22.5338				21.9113	3	8.1	anatomical structure morphogenesis;biological regulation;cell part morphogenesis;cell projection morphogenesis;cell projection organization;cellular component morphogenesis;cellular component organization;cellular component organization at cellular level;cellular component organization or biogenesis;cellular component organization or biogenesis at cellular level;cellular developmental process;cel…	binding;epidermal growth factor receptor binding;growth factor receptor binding;identical protein binding;insulin receptor binding;lipid binding;phosphatidylinositol binding;phospholipid binding;protein binding;protein complex binding;receptor binding	cell part;cell projection;cytoplasm;cytoplasmic part;cytosol;early endosome membrane;endosomal part;endosome membrane;extrinsic to membrane;Golgi apparatus;intracellular membrane-bounded organelle;intracellular organelle;intracellular organelle part;intracellular part;lamellipodium;macromolecular complex;membrane;membrane part;membrane-bounded organelle;organelle;organelle membrane;organelle part…		1.0285	22.0196	1.55149	0.204215	0.438897	-5.17638	0.40593	21.7083	0.585666	0.586916	0.71707	-6.13422	-0.62257	22.2225	-0.837335	0.455629	0.70966	-5.80223	NPC.iPS	Neu.iPS	Neu.NPC
Q13616	Cullin-1	CUL1	20.8466	21.1675	21.1699	20.2279		20.8884		19.9315		2	2.7	activation of immune response;activation of innate immune response;anaphase-promoting complex-dependent proteasomal ubiquitin-dependent protein catabolic process;anatomical structure morphogenesis;biological regulation;catabolic process;cell cycle;cell cycle arrest;cell cycle process;cell proliferation;cell surface receptor linked signaling pathway;cellular catabolic process;cellular macromolecul…		cell part;cullin-RING ubiquitin ligase complex;cytoplasmic part;cytosol;intracellular organelle part;intracellular part;macromolecular complex;nuclear part;nucleoplasm;organelle part;protein complex;SCF ubiquitin ligase complex;ubiquitin ligase complex	Cell cycle;Cell cycle - yeast;Circadian rhythm - mammal;Oocyte meiosis;Protein processing in endoplasmic reticulum;TGF-beta signaling pathway;Ubiquitin mediated proteolysis;Wnt signaling pathway	-0.503228	20.8601	-1.36505	0.217166	0.453756	-5.80198	-1.12985	20.7789	-2.33358	0.055791	0.137399	-4.31597	-0.626625	20.3493	-0.996757	0.369328	0.635795	-5.80352	NPC.iPS	Neu.iPS	Neu.NPC
Q13618-2;Q13618;Q13618-3	Cullin-3	CUL3	20.9126	20.5239	20.7751	20.5676		20.9184	19.7391	20.3417	20.3612	3	5.2	actin cytoskeleton organization;actin filament bundle assembly;actin filament organization;actin filament-based process;anatomical structure morphogenesis;biological regulation;catabolic process;cell cycle arrest;cell cycle process;cell division;cell migration;cell morphogenesis;cell morphogenesis involved in differentiation;cell motility;cell surface receptor linked signaling pathway;cellular ca…	binding;POZ domain binding;protein binding;protein domain specific binding	cell part;Cul3-RING ubiquitin ligase complex;cullin-RING ubiquitin ligase complex;cytoplasmic part;cytoskeletal part;cytosol;extracellular membrane-bounded organelle;extracellular organelle;extracellular region part;extracellular vesicular exosome;Golgi apparatus part;Golgi membrane;intracellular organelle part;intracellular part;macromolecular complex;membrane;membrane-bounded organelle;membrane…	Ubiquitin mediated proteolysis	0.00576167	20.7395	0.0168365	0.987067	0.992562	-6.73196	-0.589853	20.4423	-1.77994	0.111229	0.225048	-5.38397	-0.595615	20.3856	-1.47044	0.188062	0.454518	-5.5651	NPC.iPS	Neu.iPS	Neu.NPC
Q13619;A0A0A0MR50;Q13619-2;A6NE76;K4DI93;Q13620-3;Q13620-1;Q13620	Cullin-4A;Cullin-4B	CUL4A;CUL4B	21.0821	20.8201	22.942	20.7025	20.8977	22.4242	21.6668	21.4934	21.1638	4	5.1	anatomical structure development;biological regulation;biosynthetic process;catabolic process;cell cycle;cell cycle arrest;cell cycle process;cellular biosynthetic process;cellular catabolic process;cellular component organization;cellular component organization at cellular level;cellular component organization or biogenesis;cellular component organization or biogenesis at cellular level;cellular…		cell part;CUL4 RING ubiquitin ligase complex;Cul4A-RING ubiquitin ligase complex;Cul4B-RING ubiquitin ligase complex;cullin-RING ubiquitin ligase complex;cytoplasm;extracellular membrane-bounded organelle;extracellular organelle;extracellular region part;extracellular vesicular exosome;intracellular organelle part;intracellular part;macromolecular complex;membrane;membrane-bounded organelle;membr…	Nucleotide excision repair;Ubiquitin mediated proteolysis	-0.273293	21.4781	-0.402275	0.698607	0.837893	-6.75268	-0.173427	21.528	-0.313045	0.76189	0.847537	-6.81534	0.0998667	21.3914	0.197567	0.848627	0.931275	-6.70838	NPC.iPS	Neu.iPS	Neu.NPC
Q13636	Ras-related protein Rab-31	RAB31		19.4877				22.1115				1	7.2	biological regulation;cellular component organization;cellular component organization at cellular level;cellular component organization or biogenesis;cellular component organization or biogenesis at cellular level;cellular macromolecule metabolic process;cellular membrane organization;cellular metabolic process;cellular process;cellular response to chemical stimulus;cellular response to endogenou…	binding;catalytic activity;GDP binding;GTP binding;GTPase activity;guanyl nucleotide binding;guanyl ribonucleotide binding;hydrolase activity;hydrolase activity, acting on acid anhydrides;hydrolase activity, acting on acid anhydrides, in phosphorus-containing anhydrides;nucleoside-triphosphatase activity;nucleotide binding;purine nucleotide binding;purine ribonucleoside triphosphate binding;purin…	cell part;cytoplasmic membrane-bounded vesicle;cytoplasmic part;cytoplasmic vesicle;cytoplasmic vesicle membrane;cytoplasmic vesicle part;early endosome;endocytic vesicle;endocytic vesicle membrane;endosome;Golgi apparatus part;Golgi membrane;intracellular membrane-bounded organelle;intracellular organelle;intracellular organelle part;intracellular part;late endosome;membrane;membrane-bounded org…	Endocytosis	2.62386	20.7996	3.9581	0.02084	0.125841	-2.7642													NPC.iPS	Neu.iPS	Neu.NPC
P06280	Alpha-galactosidase A	GLA	23.2774	24.052	24.0856	22.0978				22.7088	22.6383	3	10.5	biological regulation;carbohydrate catabolic process;carbohydrate metabolic process;catabolic process;cellular carbohydrate catabolic process;cellular carbohydrate metabolic process;cellular catabolic process;cellular lipid catabolic process;cellular lipid metabolic process;cellular metabolic process;cellular process;ceramide catabolic process;ceramide metabolic process;glycolipid catabolic proce…	alpha-galactosidase activity;binding;carbohydrate binding;catalytic activity;galactosidase activity;galactoside binding;hydrolase activity;hydrolase activity, acting on glycosyl bonds;hydrolase activity, hydrolyzing O-glycosyl compounds;identical protein binding;monosaccharide binding;protein binding;protein dimerization activity;protein homodimerization activity;raffinose alpha-galactosidase act…	cell part;cytoplasm;cytoplasmic part;extracellular membrane-bounded organelle;extracellular organelle;extracellular region;extracellular region part;extracellular vesicular exosome;Golgi apparatus;intracellular membrane-bounded organelle;intracellular organelle;intracellular organelle lumen;intracellular organelle part;intracellular part;lysosomal lumen;lysosome;lytic vacuole;membrane-bounded org…	Galactose metabolism;Glycerolipid metabolism;Glycosphingolipid biosynthesis - globo series;Lysosome;Sphingolipid metabolism	-1.70717	23.3782	-3.18191	0.0211022	0.126539	-3.22829	-1.13142	23.3524	-2.77425	0.026089	0.0827227	-3.82266	0.575755	22.4817	1.01232	0.36259	0.629314	-5.7885	NPC.iPS	Neu.iPS	Neu.NPC
J3QLE5;A8MT02;P14678-2;P63162;P14678;P63162-2;P14678-3;J3KRY3;S4R3P3	Small nuclear ribonucleoprotein-associated proteins B and B;Small nuclear ribonucleoprotein-associated protein N	SNRPN;SNRPB	26.2185	26.0777	25.6332	25.3028	25.4945	25.7958	25.5742	25.2378	25.5374	8	41.4	biological regulation;biosynthetic process;cellular biosynthetic process;cellular component assembly;cellular component assembly at cellular level;cellular component organization;cellular component organization at cellular level;cellular component organization or biogenesis;cellular component organization or biogenesis at cellular level;cellular macromolecular complex assembly;cellular macromolec…	binding;histone pre-mRNA DCP binding;nucleic acid binding;RNA binding	catalytic step 2 spliceosome;cell part;cytoplasm;cytoplasmic part;cytosol;extracellular membrane-bounded organelle;extracellular organelle;extracellular region part;extracellular vesicular exosome;histone pre-mRNA 3'end processing complex;intracellular organelle part;intracellular part;macromolecular complex;membrane-bounded organelle;membrane-bounded vesicle;methylosome;methyltransferase complex…	Spliceosome;Systemic lupus erythematosus	-0.44544	25.7538	-1.43486	0.191344	0.424309	-5.82445	-0.526693	25.7131	-1.63308	0.13935	0.264179	-5.58915	-0.0812533	25.4904	-0.253029	0.807035	0.906642	-6.69452	NPC.iPS	Neu.iPS	Neu.NPC
Q13641	Trophoblast glycoprotein	TPBG	20.3489							19.1721		2	6.9	biological adhesion;cell adhesion;cellular process		cell part;cell surface;cytoplasmic part;endoplasmic reticulum;integral to membrane;integral to plasma membrane;intracellular membrane-bounded organelle;intracellular organelle;intracellular part;intrinsic to membrane;intrinsic to plasma membrane;membrane part;membrane-bounded organelle;organelle;plasma membrane part								-1.17688	19.7605	-1.69797	0.158403	0.28664	-5.02438							NPC.iPS	Neu.iPS	Neu.NPC
Q13642-1;Q13642-5;Q13642-4;Q5JXI8;Q13642;Q5JXH9;Q5JXH8;Q5JXH7;Q5JXI3;Q5JXI2;Q13642-3	Four and a half LIM domains protein 1	FHL1	22.4817	22.2283	22.5614	22.6891		22.3302	22.9746	22.3882	23.3974	5	23.6	anatomical structure development;anatomical structure morphogenesis;biological regulation;cell differentiation;cellular developmental process;cellular process;developmental process;muscle organ development;muscle structure development;negative regulation of biological process;negative regulation of cell cycle;negative regulation of cell cycle process;negative regulation of cell growth;negative re…	binding;cation binding;ion binding;ion channel binding;metal ion binding;protein binding;transition metal ion binding;zinc ion binding	adherens junction;anchoring junction;cell junction;cell part;cell-substrate adherens junction;cell-substrate junction;cytoplasm;cytoplasmic part;cytosol;focal adhesion;intracellular membrane-bounded organelle;intracellular organelle;intracellular part;membrane;membrane-bounded organelle;nucleus;organelle;plasma membrane		0.0858633	22.4581	0.252877	0.808097	0.898097	-6.69596	0.49627	22.6719	1.37955	0.203388	0.341538	-5.92069	0.410407	22.7559	0.921865	0.389492	0.660629	-6.16809	NPC.iPS	Neu.iPS	Neu.NPC
Q13724-2;Q13724;C9J8D4	Mannosyl-oligosaccharide glucosidase	MOGS	23.1952	22.3996	24.4221	23.8261	22.428	24.6412	24.1999	23.8721	21.1883	11	21.8	carbohydrate metabolic process;cellular carbohydrate metabolic process;cellular macromolecule metabolic process;cellular metabolic process;cellular process;cellular protein metabolic process;glycosylation;macromolecule glycosylation;macromolecule metabolic process;macromolecule modification;metabolic process;oligosaccharide metabolic process;peptidyl-amino acid modification;peptidyl-asparagine mo…	catalytic activity;glucosidase activity;hydrolase activity;hydrolase activity, acting on glycosyl bonds;hydrolase activity, hydrolyzing O-glycosyl compounds;mannosyl-oligosaccharide glucosidase activity	cell part;cytoplasmic part;endoplasmic reticulum;endoplasmic reticulum membrane;endoplasmic reticulum part;extracellular membrane-bounded organelle;extracellular organelle;extracellular region part;extracellular vesicular exosome;integral to membrane;intracellular membrane-bounded organelle;intracellular organelle;intracellular organelle part;intracellular part;intrinsic to membrane;membrane;memb…	N-Glycan biosynthesis;Protein processing in endoplasmic reticulum	0.292813	23.4854	0.425846	0.682075	0.82713	-6.74199	-0.252203	23.2129	-0.305219	0.767638	0.851842	-6.81799	-0.545017	23.3593	-0.611895	0.558674	0.77927	-6.52608	NPC.iPS	Neu.iPS	Neu.NPC
Q13769	THO complex subunit 5 homolog	THOC5	20.1019	20.6275	20.4806	19.9034		20.5802	19.5754	20.2299	18.9295	1	3.2	anatomical structure development;anatomical structure morphogenesis;biological regulation;blastocyst development;cell differentiation;cell division;cell morphogenesis;cellular component morphogenesis;cellular component organization;cellular component organization or biogenesis;cellular developmental process;cellular macromolecule metabolic process;cellular metabolic process;cellular nitrogen comp…	binding;mRNA binding;nucleic acid binding;RNA binding	cell part;cytoplasm;intracellular membrane-bounded organelle;intracellular organelle;intracellular organelle part;intracellular part;macromolecular complex;membrane-bounded organelle;nuclear body;nuclear part;nuclear speck;nucleoplasm;nucleoplasm part;nucleus;organelle;organelle part;protein complex;THO complex;THO complex part of transcription export complex;transcription export complex	RNA transport	-0.161517	20.3387	-0.421012	0.687184	0.830977	-6.63277	-0.825057	19.9908	-2.04574	0.0733815	0.168026	-4.99411	-0.66354	19.8437	-1.29697	0.238722	0.513415	-5.77413	NPC.iPS	Neu.iPS	Neu.NPC
Q13813-2;Q13813	Spectrin alpha chain, non-erythrocytic 1	SPTAN1	26.8544	26.9381	27.0681	27.6452	27.8481	27.2469	26.9631	26.6854	27.7732	69	35.8	actin filament capping;apoptosis;axon guidance;biological regulation;cell death;cellular component disassembly;cellular component disassembly at cellular level;cellular component disassembly involved in apoptosis;cellular component organization;cellular component organization at cellular level;cellular component organization or biogenesis;cellular component organization or biogenesis at cellular …	actin binding;binding;calcium ion binding;cation binding;cytoskeletal protein binding;ion binding;metal ion binding;protein binding;structural constituent of cytoskeleton;structural molecule activity	adherens junction;anchoring junction;cell cortex part;cell junction;cell part;cell-cell adherens junction;cell-cell junction;contractile fiber part;cuticular plate;cytoplasmic part;cytoskeletal part;cytoskeleton;cytosol;extracellular membrane-bounded organelle;extracellular organelle;extracellular region part;extracellular vesicular exosome;fascia adherens;intracellular membrane-bounded organelle…		0.626517	27.2668	2.11725	0.0690799	0.237147	-4.8777	0.187023	27.047	0.506419	0.625605	0.745866	-6.72943	-0.439493	27.3603	-1.10068	0.305067	0.580786	-6.10336	NPC.iPS	Neu.iPS	Neu.NPC
Q13838;Q13838-2;Q5STU3;A0A0A0MT12;F6TRA5;F6WLT2;F6S4E6	Spliceosome RNA helicase DDX39B	DDX39B	27.3526	27.5098	27.6951	27.2007	26.1102	27.6939	27.8148	28.1064	27.0185	23	60.3	biological regulation;cellular component assembly;cellular component assembly at cellular level;cellular component organization;cellular component organization at cellular level;cellular component organization or biogenesis;cellular component organization or biogenesis at cellular level;cellular macromolecular complex assembly;cellular macromolecular complex subunit organization;cellular macromol…	adenyl nucleotide binding;adenyl ribonucleotide binding;ATP binding;ATPase activity;ATPase activity, coupled;ATP-dependent helicase activity;ATP-dependent protein binding;ATP-dependent RNA helicase activity;binding;catalytic activity;helicase activity;hydrolase activity;hydrolase activity, acting on acid anhydrides;hydrolase activity, acting on acid anhydrides, in phosphorus-containing anhydrides…	cell part;cytoplasm;intracellular membrane-bounded organelle;intracellular non-membrane-bounded organelle;intracellular organelle;intracellular organelle part;intracellular part;macromolecular complex;membrane-bounded organelle;non-membrane-bounded organelle;nuclear body;nuclear part;nuclear speck;nucleolus;nucleoplasm;nucleoplasm part;nucleus;organelle;organelle part;protein complex;ribonucleopr…	mRNA surveillance pathway;RNA transport;Spliceosome	-0.51756	27.2604	-1.18747	0.270986	0.508283	-6.11924	0.12741	27.5829	0.341926	0.740817	0.83072	-6.805	0.64497	27.3241	1.26721	0.242967	0.515019	-5.91831	NPC.iPS	Neu.iPS	Neu.NPC
Q13885	Tubulin beta-2A chain	TUBB2A	24.5097	24.4736	24.059	27.3648	27.0449	26.7491	26.7788	27.1004	26.6364	3	12.4	cellular component assembly;cellular component assembly at cellular level;cellular component organization;cellular component organization at cellular level;cellular component organization or biogenesis;cellular component organization or biogenesis at cellular level;cellular macromolecular complex assembly;cellular macromolecular complex subunit organization;cellular macromolecule metabolic proces…	binding;catalytic activity;GTP binding;GTPase activity;guanyl nucleotide binding;guanyl ribonucleotide binding;hydrolase activity;hydrolase activity, acting on acid anhydrides;hydrolase activity, acting on acid anhydrides, in phosphorus-containing anhydrides;nucleoside-triphosphatase activity;nucleotide binding;purine nucleotide binding;purine ribonucleoside triphosphate binding;purine ribonucleo…	cell part;cytoplasm;cytoskeletal part;extracellular membrane-bounded organelle;extracellular organelle;extracellular region part;extracellular vesicular exosome;intracellular membrane-bounded organelle;intracellular organelle;intracellular organelle part;intracellular part;macromolecular complex;membrane-bounded organelle;membrane-bounded vesicle;microtubule;nucleus;organelle;organelle part;prote…	Gap junction;Pathogenic Escherichia coli infection;Phagosome	2.70546	25.7002	8.69576	3.3568e-05	0.00376441	2.9719	2.4911	25.593	7.77291	4.13884e-05	0.0012296	2.66373	-0.214363	26.9457	-0.637764	0.542581	0.767602	-6.50892	NPC.iPS	Neu.iPS	Neu.NPC
Q13895;H7BY94	Bystin	BYSL	20.6373	20.4584	20.2492							2	5.7	biological adhesion;cell adhesion;cell differentiation;cell proliferation;cellular developmental process;cellular macromolecule metabolic process;cellular metabolic process;cellular nitrogen compound metabolic process;cellular process;developmental process;female pregnancy;macromolecule metabolic process;maturation of SSU-rRNA;maturation of SSU-rRNA from tricistronic rRNA transcript (SSU-rRNA, 5.…		apical part of cell;cell part;cytoplasm;intracellular membrane-bounded organelle;intracellular non-membrane-bounded organelle;intracellular organelle;intracellular organelle part;intracellular part;membrane;membrane-bounded organelle;non-membrane-bounded organelle;nuclear part;nucleolus;nucleus;organelle;organelle part																				NPC.iPS	Neu.iPS	Neu.NPC
Q13907;Q13907-2	Isopentenyl-diphosphate Delta-isomerase 1	IDI1	22.8339	21.7874	23.5291	23.9163	23.5063	24.395	24.5366	23.9959	23.9652	7	40.1	alcohol biosynthetic process;alcohol metabolic process;biosynthetic process;cellular biosynthetic process;cellular lipid metabolic process;cellular metabolic process;cellular process;cholesterol biosynthetic process;cholesterol metabolic process;dimethylallyl diphosphate biosynthetic process;dimethylallyl diphosphate metabolic process;isoprenoid biosynthetic process;isoprenoid metabolic process;l…	binding;catalytic activity;cation binding;hydrolase activity;intramolecular oxidoreductase activity;intramolecular oxidoreductase activity, transposing C=C bonds;ion binding;isomerase activity;isopentenyl-diphosphate delta-isomerase activity;magnesium ion binding;manganese ion binding;metal ion binding;transition metal ion binding	cell part;cytoplasmic part;cytosol;intracellular membrane-bounded organelle;intracellular organelle;intracellular part;membrane-bounded organelle;microbody;mitochondrion;organelle;peroxisome	Terpenoid backbone biosynthesis	1.22238	23.328	2.49841	0.0386521	0.176064	-4.30501	1.44911	23.4413	3.07287	0.0144418	0.0533779	-3.38517	0.226723	24.0525	0.606854	0.561843	0.77927	-6.52934	NPC.iPS	Neu.iPS	Neu.NPC
O95400	CD2 antigen cytoplasmic tail-binding protein 2	CD2BP2	20.7237	20.4198	20.4507	21.608	21.3984	19.765	19.2845		19.9379	3	12.9	assembly of spliceosomal tri-snRNP;biological regulation;cellular component assembly;cellular component assembly at cellular level;cellular component organization;cellular component organization at cellular level;cellular component organization or biogenesis;cellular component organization or biogenesis at cellular level;cellular macromolecular complex assembly;cellular macromolecular complex sub…	binding;ribonucleoprotein binding	cell part;cytoplasm;intracellular membrane-bounded organelle;intracellular organelle;intracellular organelle part;intracellular part;macromolecular complex;membrane-bounded organelle;nuclear part;nucleoplasm;nucleus;organelle;organelle part;ribonucleoprotein complex;small nuclear ribonucleoprotein complex;U5 snRNP		0.392413	20.7276	0.779556	0.459341	0.67106	-6.51524	-0.920207	20.1633	-2.38177	0.0469304	0.12241	-4.41178	-1.31262	20.3988	-2.04447	0.083227	0.29742	-4.79978	NPC.iPS	Neu.iPS	Neu.NPC
P06396-2	Gelsolin	GSN	24.2014	24.0423	23.9645	25.487	26.1973	26.0556	23.9801	23.1481	24.6995	15	32.4	actin cytoskeleton organization;actin filament capping;actin filament organization;actin filament polymerization;actin filament severing;actin filament-based process;actin nucleation;actin polymerization or depolymerization;aging;anatomical structure development;anatomical structure morphogenesis;apoptosis;barbed-end actin filament capping;biological regulation;cell death;cell development;cell pa…	actin binding;binding;calcium ion binding;cation binding;cytoskeletal protein binding;ion binding;metal ion binding;myosin binding;myosin II binding;protein binding;protein domain specific binding	actin cap;actin cytoskeleton;adherens junction;anchoring junction;blood microparticle;cell cortex part;cell junction;cell part;cell projection;cell-substrate adherens junction;cell-substrate junction;cortical actin cytoskeleton;cortical cytoskeleton;cytoplasm;cytoplasmic part;cytoskeletal part;cytoskeleton;cytosol;extracellular membrane-bounded organelle;extracellular organelle;extracellular regi…	Fc gamma R-mediated phagocytosis;Regulation of actin cytoskeleton	1.84384	24.9913	5.9353	0.000430983	0.0158248	0.361566	-0.126837	24.006	-0.29739	0.773402	0.85649	-6.82057	-1.97068	24.9279	-4.21846	0.00336915	0.0540587	-1.70023	NPC.iPS	Neu.iPS	Neu.NPC
Q14008-2;Q14008;Q14008-3	Cytoskeleton-associated protein 5	CKAP5	23.3716	23.7136	23.4742	24.2354	24.4621	25.002	24.4545	24.7495	23.899	21	13.7	biological regulation;cell cycle;cell cycle phase;cell cycle process;cell division;cellular component organization;cellular component organization at cellular level;cellular component organization or biogenesis;cellular component organization or biogenesis at cellular level;cellular process;cellular response to stimulus;centrosome organization;cytoskeleton organization;establishment of localizati…		cell part;centrosome;cytoplasmic part;cytoskeletal part;cytosol;intracellular non-membrane-bounded organelle;intracellular organelle;intracellular organelle part;intracellular part;macromolecular complex;membrane;microtubule organizing center;non-membrane-bounded organelle;organelle;organelle part;protein complex;spindle pole		1.04668	24.0431	3.28057	0.0120804	0.0943619	-3.1204	0.847903	23.9437	2.46514	0.0376894	0.10581	-4.3473	-0.198777	24.4671	-0.518865	0.618794	0.809524	-6.5824	NPC.iPS	Neu.iPS	Neu.NPC
A8MT37;P49840	Glycogen synthase kinase-3 alpha	GSK3A						21.518	22.3764			4	16.7	anatomical structure development;anatomical structure morphogenesis;biological regulation;carbohydrate metabolic process;cardiac chamber morphogenesis;cardiac left ventricle morphogenesis;cardiac ventricle morphogenesis;catabolic process;cell surface receptor linked signaling pathway;cellular carbohydrate metabolic process;cellular catabolic process;cellular glucan metabolic process;cellular macr…	adenyl nucleotide binding;adenyl ribonucleotide binding;ATP binding;binding;catalytic activity;enzyme binding;kinase activity;kinase binding;nucleotide binding;phosphotransferase activity, alcohol group as acceptor;protein binding;protein kinase A binding;protein kinase A catalytic subunit binding;protein kinase activity;protein kinase binding;protein serine/threonine kinase activity;purine nucle…	beta-catenin destruction complex;cell part;cytoplasmic part;cytosol;intracellular part;macromolecular complex;protein complex	Chemokine signaling pathway													0.85843	21.9472	1.15456	0.320804	0.591494	-5.50334	NPC.iPS	Neu.iPS	Neu.NPC
Q14011;K7EMY9;K7EPM4;K7EQR7;D6W5Y5;Q14011-2;K7ENX8;K7EJV5;K7ELT6;K7EJV1;K7ER40;K7ELV6	Cold-inducible RNA-binding protein	CIRBP	23.4619	23.512	22.8715	25.45	26.4686	24.934	25.6066	24.459	26.6092	9	49.4	biological regulation;cellular component assembly;cellular component assembly at cellular level;cellular component organization;cellular component organization at cellular level;cellular component organization or biogenesis;cellular component organization or biogenesis at cellular level;cellular macromolecular complex assembly;cellular macromolecular complex subunit organization;cellular macromol…	binding;mRNA 3'-UTR binding;mRNA binding;nucleic acid binding;nucleotide binding;RNA binding;rRNA binding;SSU rRNA binding;translation regulator activity;translation repressor activity	cell part;cytoplasm;cytoplasmic part;intracellular membrane-bounded organelle;intracellular non-membrane-bounded organelle;intracellular organelle;intracellular organelle part;intracellular part;macromolecular complex;membrane-bounded organelle;non-membrane-bounded organelle;nuclear part;nucleoplasm;nucleus;organelle;organelle part;ribonucleoprotein complex;RNA granule;stress granule		2.33574	24.4496	5.23764	0.000939553	0.0230484	-0.452489	2.27649	24.42	4.24226	0.00254165	0.0166627	-1.59564	-0.0592467	25.5879	-0.0936822	0.927813	0.966814	-6.72523	NPC.iPS	Neu.iPS	Neu.NPC
Q14019;H3BT58	Coactosin-like protein	COTL1	24.9914	25.0705	24.7509	28.7567	28.4376	28.9766	26.9494	26.6946	26.9525	18	93.7	alkene biosynthetic process;biosynthetic process;carboxylic acid biosynthetic process;carboxylic acid metabolic process;cellular alkene metabolic process;cellular biosynthetic process;cellular ketone metabolic process;cellular lipid metabolic process;cellular metabolic process;cellular process;defense response;defense response to fungus;fatty acid biosynthetic process;fatty acid metabolic process…	actin binding;binding;cytoskeletal protein binding;enzyme binding;protein binding	cell part;cytoplasm;cytoskeleton;extracellular membrane-bounded organelle;extracellular organelle;extracellular region part;extracellular vesicular exosome;intracellular;intracellular non-membrane-bounded organelle;intracellular organelle;intracellular organelle part;intracellular part;membrane;membrane-bounded organelle;membrane-bounded vesicle;non-membrane-bounded organelle;nuclear membrane;nuc…		3.78604	26.8306	12.8457	2.08156e-06	0.000943227	5.61692	1.92787	25.9015	6.36815	0.000176707	0.00300529	1.17539	-1.85817	27.7946	-5.78867	0.000519301	0.021145	0.235913	NPC.iPS	Neu.iPS	Neu.NPC
Q14103-3;Q14103;H0Y8G5;H0YA96;Q14103-4;Q14103-2;D6RAF8;D6RF44	Heterogeneous nuclear ribonucleoprotein D0	HNRNPD	29.0218	28.97	28.4699	29.162	29.7349	28.9773	29.2467	29.1325	29.4826	23	54.9	biological regulation;biosynthetic process;catabolic process;cellular biosynthetic process;cellular catabolic process;cellular macromolecule biosynthetic process;cellular macromolecule catabolic process;cellular macromolecule metabolic process;cellular metabolic process;cellular nitrogen compound metabolic process;cellular process;gene expression;macromolecule biosynthetic process;macromolecule c…	binding;DNA binding;nucleic acid binding;nucleotide binding;RNA binding;sequence-specific DNA binding;telomeric DNA binding	cell part;cytoplasmic part;cytosol;extracellular membrane-bounded organelle;extracellular organelle;extracellular region part;extracellular vesicular exosome;intracellular membrane-bounded organelle;intracellular organelle;intracellular organelle part;intracellular part;macromolecular complex;membrane-bounded organelle;membrane-bounded vesicle;nuclear part;nucleoplasm;nucleus;organelle;organelle …		0.47082	29.056	1.40119	0.200818	0.434686	-5.86656	0.466677	29.0539	1.44992	0.183423	0.318393	-5.83192	-0.00414333	29.2893	-0.0119871	0.990748	0.995062	-6.73005	NPC.iPS	Neu.iPS	Neu.NPC
Q14108;Q14108-2	Lysosome membrane protein 2	SCARB2	20.8037	21.2589	20.1215	21.9112	21.5096	23.008	25.5588	25.8768	24.1831	10	25.9	biological adhesion;cell adhesion;cellular process;establishment of localization;establishment of localization in cell;establishment of protein localization;establishment of protein localization to organelle;establishment of protein localization to vacuole;intracellular protein transport;intracellular transport;lysosomal transport;protein targeting;protein targeting to lysosome;protein targeting …	binding;enzyme binding;protein binding;receptor activity	adherens junction;anchoring junction;cell junction;cell part;cell-substrate adherens junction;cell-substrate junction;cytoplasmic part;extracellular membrane-bounded organelle;extracellular organelle;extracellular region part;extracellular vesicular exosome;focal adhesion;integral to membrane;intracellular membrane-bounded organelle;intracellular organelle;intracellular organelle lumen;intracellu…	Lysosome	1.4149	21.4355	2.93241	0.020124	0.123739	-3.64479	4.47817	22.9671	8.70411	1.76179e-05	0.000656337	3.52486	3.06327	23.6746	5.2781	0.000918565	0.0276498	-0.352299	NPC.iPS	Neu.iPS	Neu.NPC
Q14117	Dihydropyrimidinase	DPYS								20.9698		1	2.9	amine metabolic process;beta-alanine metabolic process;carboxylic acid metabolic process;catabolic process;cellular amine metabolic process;cellular amino acid metabolic process;cellular aromatic compound metabolic process;cellular catabolic process;cellular component assembly;cellular component organization;cellular component organization or biogenesis;cellular ketone metabolic process;cellular …	amine binding;amino acid binding;binding;carboxylic acid binding;catalytic activity;cation binding;dihydropyrimidinase activity;hydrolase activity;hydrolase activity, acting on carbon-nitrogen (but not peptide) bonds;hydrolase activity, acting on carbon-nitrogen (but not peptide) bonds, in cyclic amides;ion binding;metal ion binding;nucleobase binding;pyrimidine base binding;thymine binding;trans…	cell part;cytoplasmic part;cytosol;extracellular membrane-bounded organelle;extracellular organelle;extracellular region part;extracellular vesicular exosome;intracellular part;membrane-bounded organelle;membrane-bounded vesicle;organelle;vesicle	beta-Alanine metabolism;Drug metabolism - other enzymes;Pantothenate and CoA biosynthesis;Pyrimidine metabolism																			NPC.iPS	Neu.iPS	Neu.NPC
Q14126	Desmoglein-2	DSG2	20.992	21.1666								1	2.1	anatomical structure development;apoptosis;biological adhesion;cardiac Purkinje fiber development;cell adhesion;cell death;cell-cell adhesion;cellular component disassembly;cellular component disassembly at cellular level;cellular component disassembly involved in apoptosis;cellular component organization;cellular component organization at cellular level;cellular component organization or biogene…	binding;calcium ion binding;cation binding;cell adhesion molecule binding;ion binding;metal ion binding;protein binding	anchoring junction;apical plasma membrane;cell junction;cell part;cell surface;cell-cell contact zone;cell-cell junction;desmosome;extracellular membrane-bounded organelle;extracellular organelle;extracellular region part;extracellular vesicular exosome;integral to membrane;intercalated disc;intrinsic to membrane;lateral plasma membrane;membrane;membrane part;membrane-bounded organelle;membrane-b…	Arrhythmogenic right ventricular cardiomyopathy (ARVC)																			NPC.iPS	Neu.iPS	Neu.NPC
Q14137-2;Q14137	Ribosome biogenesis protein BOP1	BOP1	22.093	22.1337	22.6231		21.4185	21.8394	19.8766	21.572	19.2105	5	16.9	biological regulation;cell proliferation;cellular component biogenesis;cellular component biogenesis at cellular level;cellular component organization or biogenesis;cellular component organization or biogenesis at cellular level;cellular macromolecule metabolic process;cellular metabolic process;cellular nitrogen compound metabolic process;cellular process;cleavage in ITS2 between 5.8S rRNA and L…	binding;ribonucleoprotein binding	cell part;intracellular organelle part;intracellular part;macromolecular complex;nuclear part;nucleolar part;nucleoplasm;organelle part;PeBoW complex;preribosome;preribosome, large subunit precursor;protein complex;ribonucleoprotein complex		-0.654307	22.0216	-1.79565	0.118432	0.323183	-5.24662	-2.06363	21.2515	-3.57462	0.0067055	0.0315387	-2.59978	-1.40932	20.7834	-1.9636	0.0934534	0.315819	-4.91217	NPC.iPS	Neu.iPS	Neu.NPC
Q14151	Scaffold attachment factor B2	SAFB2	21.551	21.5563	21.2148	21.2327		20.9431				2	2.6	biological regulation;biosynthetic process;cellular biosynthetic process;cellular macromolecule biosynthetic process;cellular macromolecule metabolic process;cellular metabolic process;cellular nitrogen compound metabolic process;cellular process;macromolecule biosynthetic process;macromolecule metabolic process;metabolic process;nitrogen compound metabolic process;nucleic acid metabolic process;…	binding;DNA binding;identical protein binding;nucleic acid binding;nucleotide binding;protein binding	cell part;cytoplasm;extracellular membrane-bounded organelle;extracellular organelle;extracellular region part;extracellular vesicular exosome;intracellular membrane-bounded organelle;intracellular organelle;intracellular organelle part;intracellular part;membrane-bounded organelle;membrane-bounded vesicle;nuclear part;nucleoplasm;organelle;organelle part;vesicle		-0.352785	21.2996	-1.04268	0.33396	0.564924	-6.16121													NPC.iPS	Neu.iPS	Neu.NPC
P06576;H0YH81;F8W079	ATP synthase subunit beta, mitochondrial;ATP synthase subunit beta	ATP5B	29.1553	29.1853	28.4248	29.0706	29.6032	28.8041	30.309	29.976	30.6861	30	80.2	anatomical structure formation involved in morphogenesis;angiogenesis;ATP biosynthetic process;ATP hydrolysis coupled proton transport;ATP metabolic process;ATP synthesis coupled proton transport;biological regulation;biosynthetic process;cation homeostasis;cation transport;cell differentiation;cellular biosynthetic process;cellular cation homeostasis;cellular chemical homeostasis;cellular compon…	active transmembrane transporter activity;adenyl nucleotide binding;adenyl ribonucleotide binding;ATP binding;ATPase activity;ATPase activity, coupled;ATPase activity, coupled to movement of substances;ATPase activity, coupled to transmembrane movement of ions;ATPase activity, coupled to transmembrane movement of substances;binding;catalytic activity;cation transmembrane transporter activity;cati…	cell part;cell surface;cytoplasmic part;extracellular membrane-bounded organelle;extracellular organelle;extracellular region part;extracellular vesicular exosome;intracellular membrane-bounded organelle;intracellular non-membrane-bounded organelle;intracellular organelle;intracellular organelle lumen;intracellular organelle part;intracellular part;macromolecular complex;membrane;membrane part;me…	Alzheimer's disease;Huntington's disease;Oxidative phosphorylation;Parkinson's disease	0.237487	29.0406	0.656398	0.53102	0.719374	-6.60781	1.40187	29.6228	3.83933	0.00453049	0.0238884	-2.19501	1.16438	29.7415	3.13538	0.015064	0.114808	-3.2468	NPC.iPS	Neu.iPS	Neu.NPC
Q14152-2;Q14152	Eukaryotic translation initiation factor 3 subunit A	EIF3A	26.3754	26.07	26.8093	25.4149	26.5486	25.8214	25.4029	25.0555	24.4646	36	27.7	biological regulation;biosynthetic process;cellular biosynthetic process;cellular component assembly;cellular component assembly at cellular level;cellular component organization;cellular component organization at cellular level;cellular component organization or biogenesis;cellular component organization or biogenesis at cellular level;cellular macromolecular complex assembly;cellular macromolec…	binding;nucleic acid binding;RNA binding;structural molecule activity;translation factor activity, nucleic acid binding;translation initiation factor activity	cell part;cytoplasm;cytoplasmic part;cytosol;eukaryotic 43S preinitiation complex;eukaryotic 48S preinitiation complex;eukaryotic translation initiation factor 3 complex;eukaryotic translation initiation factor 3 complex, eIF3m;intracellular membrane-bounded organelle;intracellular non-membrane-bounded organelle;intracellular organelle;intracellular organelle part;intracellular part;macromolecula…	RNA transport	-0.489963	26.1733	-1.25881	0.245551	0.482295	-6.03787	-1.44392	25.6963	-3.83878	0.00453414	0.0238884	-2.19584	-0.95396	25.4513	-2.22001	0.0593268	0.239648	-4.62215	NPC.iPS	Neu.iPS	Neu.NPC
Q14160;Q14160-3;Q14160-2	Protein scribble homolog	SCRIB	21.2329	20.9071	22.3178	22.2359	21.334	21.7355	19.7966	20.8087	20.7403	5	5.3	anatomical structure development;anatomical structure formation involved in morphogenesis;anatomical structure morphogenesis;apoptosis;apoptosis involved in morphogenesis;astrocyte cell migration;asymmetric protein localization;auditory receptor cell stereocilium organization;biological adhesion;biological regulation;cell adhesion;cell death;cell migration;cell motility;cell projection organizati…		adherens junction;anchoring junction;basolateral plasma membrane;cell junction;cell part;cell projection;cell-cell adherens junction;cell-cell junction;cytoplasm;cytoplasmic part;extracellular membrane-bounded organelle;extracellular organelle;extracellular region part;extracellular vesicular exosome;intracellular organelle part;intracellular part;lamellipodium;macromolecular complex;membrane;mem…		0.282487	21.6272	0.629827	0.547352	0.72908	-6.62593	-1.03743	20.9672	-2.20504	0.057015	0.139572	-4.75187	-1.31992	21.1085	-3.11821	0.0154457	0.115475	-3.27239	NPC.iPS	Neu.iPS	Neu.NPC
A0A024QZX5;A0A087X1N8;P35237	Serpin B6	SERPINB6				22.1313	19.9129	20.5632	21.2265	20.303	20.5723	5	17.4	biological regulation;cellular process;cellular response to abiotic stimulus;cellular response to osmotic stress;cellular response to stimulus;cellular response to stress;multicellular organismal process;negative regulation of catalytic activity;negative regulation of endopeptidase activity;negative regulation of hydrolase activity;negative regulation of molecular function;negative regulation of …	binding;endopeptidase inhibitor activity;endopeptidase regulator activity;enzyme binding;enzyme inhibitor activity;enzyme regulator activity;peptidase inhibitor activity;peptidase regulator activity;protease binding;protein binding;serine-type endopeptidase inhibitor activity	cell part;cytoplasm;cytoplasmic part;cytosol;extracellular membrane-bounded organelle;extracellular organelle;extracellular region part;extracellular space;extracellular vesicular exosome;intracellular part;macromolecular complex;membrane-bounded organelle;membrane-bounded vesicle;organelle;protein complex;vesicle	Amoebiasis													-0.16855	20.7848	-0.28206	0.785515	0.89453	-6.68592	NPC.iPS	Neu.iPS	Neu.NPC
A0A087WTU4;Q9P227-2;Q9P227	Rho GTPase-activating protein 23	ARHGAP23									19.3534	1	8.8	biological regulation;cellular process;cellular response to stimulus;intracellular signal transduction;regulation of biological process;regulation of cellular process;regulation of response to stimulus;regulation of signal transduction;regulation of signaling;regulation of small GTPase mediated signal transduction;response to stimulus;signal transduction;small GTPase mediated signal transduction	enzyme activator activity;enzyme regulator activity;GTPase activator activity;GTPase regulator activity;nucleoside-triphosphatase regulator activity	cell part;cytoplasmic part;cytosol;extracellular membrane-bounded organelle;extracellular organelle;extracellular region part;extracellular vesicular exosome;intracellular;intracellular part;membrane-bounded organelle;membrane-bounded vesicle;organelle;vesicle																				NPC.iPS	Neu.iPS	Neu.NPC
C9J3W3;A8MV53;Q9NQ55-2;Q9NQ55;Q9NQ55-3	Suppressor of SWI4 1 homolog	PPAN	20.7904	21.0544								1	7.6			cell part;intracellular membrane-bounded organelle;intracellular non-membrane-bounded organelle;intracellular organelle;intracellular organelle part;intracellular part;membrane-bounded organelle;non-membrane-bounded organelle;nuclear part;nucleolus;nucleus;organelle;organelle part																				NPC.iPS	Neu.iPS	Neu.NPC
Q14166	Tubulin--tyrosine ligase-like protein 12	TTLL12	23.0735	23.2349	23.6682	21.6187		21.963	21.9141	22.0451		6	16.8	cellular macromolecule metabolic process;cellular metabolic process;cellular process;cellular protein metabolic process;macromolecule metabolic process;macromolecule modification;metabolic process;primary metabolic process;protein metabolic process;protein modification process				-1.53466	22.7117	-4.24068	0.00443629	0.0544967	-1.88492	-1.34588	22.7872	-3.58196	0.00818182	0.0360954	-2.63196	0.188785	21.8853	0.434976	0.680099	0.846529	-6.42331	NPC.iPS	Neu.iPS	Neu.NPC
Q14194-2;E9PD68;Q14194	Dihydropyrimidinase-related protein 1	CRMP1	26.0111	25.9911	25.9459	27.9258	28.1424	27.5358	29.8578	29.1119	30.2589	36	68.1	anatomical structure development;axon guidance;cellular component organization;cellular component organization at cellular level;cellular component organization or biogenesis;cellular component organization or biogenesis at cellular level;cellular metabolic process;cellular nitrogen compound metabolic process;cellular process;chemotaxis;cytoskeleton organization;developmental process;locomotion;m…	catalytic activity;hydrolase activity;hydrolase activity, acting on carbon-nitrogen (but not peptide) bonds	cell body;cell part;cell projection;cytoplasm;cytoplasmic part;cytoskeletal part;cytosol;dendrite;intracellular non-membrane-bounded organelle;intracellular organelle;intracellular organelle part;intracellular part;microtubule organizing center;neuron projection;neuronal cell body;non-membrane-bounded organelle;organelle;organelle part;spindle		1.88533	26.9253	6.43319	0.000256532	0.0109842	0.900506	3.76019	27.8628	10.1293	5.45975e-06	0.000291228	4.68136	1.87486	28.8054	4.64308	0.00196266	0.0402563	-1.13919	NPC.iPS	Neu.iPS	Neu.NPC
Q14195-2;Q14195	Dihydropyrimidinase-related protein 3	DPYSL3	28.6287	28.5768	28.3565	27.0766	27.5499	26.2977	30.5805	29.775	31.0125	47	82.7	actin crosslink formation;actin cytoskeleton organization;actin filament bundle assembly;actin filament organization;actin filament-based process;axon guidance;biological regulation;cellular component assembly;cellular component assembly at cellular level;cellular component organization;cellular component organization at cellular level;cellular component organization or biogenesis;cellular compon…	binding;carbohydrate binding;catalytic activity;chondroitin sulfate binding;glycosaminoglycan binding;hydrolase activity;hydrolase activity, acting on carbon-nitrogen (but not peptide) bonds;pattern binding;polysaccharide binding;protein binding;protein domain specific binding;SH3 domain binding	cell body;cell part;cell projection;cell projection part;cytoplasmic membrane-bounded vesicle;cytoplasmic part;cytoplasmic vesicle;cytoskeletal part;cytosol;exocytic vesicle;extracellular region part;extracellular space;filamentous actin;growth cone;intracellular membrane-bounded organelle;intracellular organelle;intracellular organelle part;intracellular part;lamellipodium;macromolecular complex…		-1.54589	27.7477	-4.08561	0.00394795	0.0510847	-1.95661	1.93534	29.4883	5.0004	0.000913347	0.00876345	-0.530546	3.48124	28.7154	7.30434	0.00011488	0.0102711	1.76926	NPC.iPS	Neu.iPS	Neu.NPC
Q14204	Cytoplasmic dynein 1 heavy chain 1	DYNC1H1	27.7084	27.7286	28.2558	28.4364	27.2227	28.8928	29.2049	29.0518	27.8344	158	42.7	antigen processing and presentation;antigen processing and presentation of exogenous antigen;antigen processing and presentation of exogenous peptide antigen;antigen processing and presentation of exogenous peptide antigen via MHC class II;antigen processing and presentation of peptide antigen;antigen processing and presentation of peptide antigen via MHC class II;antigen processing and presentat…	adenyl nucleotide binding;adenyl ribonucleotide binding;ATP binding;ATPase activity;binding;catalytic activity;hydrolase activity;hydrolase activity, acting on acid anhydrides;hydrolase activity, acting on acid anhydrides, in phosphorus-containing anhydrides;microtubule motor activity;motor activity;nucleoside-triphosphatase activity;nucleotide binding;purine nucleotide binding;purine ribonucleos…	cell part;cell projection;centrosome;cytoplasmic dynein complex;cytoplasmic part;cytoskeletal part;cytosol;dynein complex;extracellular membrane-bounded organelle;extracellular organelle;extracellular region part;extracellular vesicular exosome;filopodium;intracellular non-membrane-bounded organelle;intracellular organelle;intracellular organelle part;intracellular part;macromolecular complex;mem…	Phagosome;Vasopressin-regulated water reabsorption	0.28633	28.0408	0.614199	0.557097	0.737425	-6.63628	0.799393	28.2973	1.84006	0.101321	0.211566	-5.29768	0.513063	28.4405	0.909016	0.391585	0.661537	-6.29251	NPC.iPS	Neu.iPS	Neu.NPC
Q14240;Q14240-2;E7EQG2	Eukaryotic initiation factor 4A-II;Eukaryotic initiation factor 4A-II, N-terminally processed	EIF4A2	23.6452	23.7089	24.0919	23.2707	23.2977	22.2919	24.5249	24.5226	24.491	5	19.7	biological regulation;biosynthetic process;catabolic process;cell surface receptor linked signaling pathway;cellular biosynthetic process;cellular catabolic process;cellular macromolecule biosynthetic process;cellular macromolecule catabolic process;cellular macromolecule metabolic process;cellular metabolic process;cellular nitrogen compound metabolic process;cellular process;cellular protein me…	adenyl nucleotide binding;adenyl ribonucleotide binding;ATP binding;ATPase activity;ATPase activity, coupled;ATP-dependent helicase activity;ATP-dependent RNA helicase activity;binding;catalytic activity;helicase activity;hydrolase activity;hydrolase activity, acting on acid anhydrides;hydrolase activity, acting on acid anhydrides, in phosphorus-containing anhydrides;nucleic acid binding;nucleosi…	cell part;cytoplasmic part;cytosol;eukaryotic translation initiation factor 4F complex;intracellular non-membrane-bounded organelle;intracellular organelle;intracellular organelle part;intracellular part;macromolecular complex;non-membrane-bounded organelle;nuclear part;nucleolus;organelle;organelle part;perinuclear region of cytoplasm;protein complex	RNA transport	-0.86191	23.3844	-2.3269	0.0501808	0.200192	-4.56454	0.697503	24.1641	2.28596	0.0501315	0.127837	-4.627	1.55941	23.7331	4.10249	0.00392314	0.0584746	-1.85823	NPC.iPS	Neu.iPS	Neu.NPC
R4GN98;P06703	Protein S100;Protein S100-A6	S100A6		18.3436	18.9207					17.4265	20.2312	6	47.1	anatomical structure morphogenesis;axonogenesis;biological regulation;cell part morphogenesis;cell projection morphogenesis;cell projection organization;cellular component morphogenesis;cellular component organization;cellular component organization at cellular level;cellular component organization or biogenesis;cellular component organization or biogenesis at cellular level;cellular developmenta…	binding;calcium ion binding;calcium-dependent protein binding;cation binding;cytoskeletal protein binding;identical protein binding;ion binding;ion transmembrane transporter activity;metal ion binding;protein binding;protein dimerization activity;protein homodimerization activity;substrate-specific transmembrane transporter activity;substrate-specific transporter activity;transition metal ion bin…	cell part;cell projection;cytoplasm;cytoplasmic part;cytosol;envelope;extracellular membrane-bounded organelle;extracellular organelle;extracellular region part;extracellular vesicular exosome;extrinsic to internal side of plasma membrane;extrinsic to membrane;extrinsic to plasma membrane;intracellular membrane-bounded organelle;intracellular organelle;intracellular organelle part;intracellular p…								0.196675	18.7305	0.218955	0.833515	0.896134	-6.64201							NPC.iPS	Neu.iPS	Neu.NPC
Q14247;Q14247-3;Q14247-2;H7C314	Src substrate cortactin	CTTN	24.199	23.8331	22.3629	23.5973	24.4935	23.6483	23.3604	23.1521	24.7329	10	22.7	actin cytoskeleton organization;actin cytoskeleton reorganization;actin filament organization;actin filament polymerization;actin filament-based process;actin polymerization or depolymerization;anatomical structure morphogenesis;biological regulation;cell junction assembly;cell junction organization;cell motility;cell part morphogenesis;cell projection assembly;cell projection morphogenesis;cell …	binding;profilin binding;protein binding	adherens junction;anchoring junction;cell cortex;cell cortex part;cell junction;cell part;cell projection;cell projection part;cell-substrate adherens junction;cell-substrate junction;coated pit;cortical cytoskeleton;cytoplasm;cytoplasmic part;cytoskeletal part;cytoskeleton;dendritic spine;extracellular membrane-bounded organelle;extracellular organelle;extracellular region part;extracellular ves…	Bacterial invasion of epithelial cells;Pathogenic Escherichia coli infection;Shigellosis;Tight junction	0.448047	23.689	0.846531	0.423223	0.641371	-6.45924	0.283467	23.6067	0.478339	0.64463	0.760099	-6.74431	-0.16458	23.8308	-0.321476	0.756615	0.879915	-6.67279	NPC.iPS	Neu.iPS	Neu.NPC
Q14257;Q14257-2;H0YL43	Reticulocalbin-2	RCN2	25.1623	25.0666	24.4777	26.3333	27.545	26.1927	26.2049	25.9487	26.8171	12	40.7		binding;calcium ion binding;cation binding;ion binding;metal ion binding	cell part;cytoplasmic part;endoplasmic reticulum;endoplasmic reticulum lumen;endoplasmic reticulum part;intracellular membrane-bounded organelle;intracellular non-membrane-bounded organelle;intracellular organelle;intracellular organelle lumen;intracellular organelle part;intracellular part;membrane-bounded organelle;membrane-enclosed lumen;non-membrane-bounded organelle;nuclear part;nucleolus;or…		1.78811	25.7963	4.09481	0.00389992	0.0507488	-1.94381	1.42136	25.6129	3.83644	0.00454968	0.0238884	-2.19938	-0.366747	26.5069	-0.782562	0.457851	0.710771	-6.40142	NPC.iPS	Neu.iPS	Neu.NPC
Q14258	E3 ubiquitin/ISG15 ligase TRIM25	TRIM25	20.1154	20.176	20.4512	20.4764		20.624	20.0442			3	8.3	biological regulation;biosynthetic process;cell surface receptor linked signaling pathway;cellular biosynthetic process;cellular macromolecule biosynthetic process;cellular macromolecule metabolic process;cellular metabolic process;cellular nitrogen compound metabolic process;cellular process;cellular protein metabolic process;cellular response to chemical stimulus;cellular response to cytokine s…	acid-amino acid ligase activity;binding;catalytic activity;cation binding;ion binding;ligase activity;ligase activity, forming carbon-nitrogen bonds;metal ion binding;nucleic acid binding transcription factor activity;sequence-specific DNA binding transcription factor activity;transition metal ion binding;zinc ion binding	cell part;cytoplasm;cytoplasmic part;cytosol;intracellular organelle part;intracellular part;nuclear part;nucleoplasm;organelle part	RIG-I-like receptor signaling pathway	0.302643	20.3686	0.916884	0.391638	0.618265	-6.28309	-0.203327	20.1967	-0.420908	0.68762	0.791278	-6.42906	-0.50597	20.3815	-0.885795	0.420456	0.688577	-5.9062	NPC.iPS	Neu.iPS	Neu.NPC
Q14315-2;Q14315	Filamin-C	FLNC	22.4509	21.7255		23.0099	22.7286	25.0884	20.732	21.4768	21.7491	53	24.1	anatomical structure development;cell development;cell junction assembly;cell junction organization;cellular component assembly;cellular component assembly at cellular level;cellular component organization;cellular component organization at cellular level;cellular component organization or biogenesis;cellular component organization or biogenesis at cellular level;cellular developmental process;ce…	ankyrin binding;binding;cytoskeletal protein binding;protein binding	adherens junction;anchoring junction;cell junction;cell part;cell-substrate adherens junction;cell-substrate junction;contractile fiber part;costamere;cytoplasm;cytoplasmic part;cytoskeleton;cytosol;focal adhesion;intracellular non-membrane-bounded organelle;intracellular organelle;intracellular part;membrane;non-membrane-bounded organelle;organelle;organelle part;plasma membrane;sarcolemma;sarco…	Focal adhesion;MAPK signaling pathway	1.52077	23.0007	2.04214	0.0831287	0.263129	-4.90523	-0.768913	21.6269	-1.67351	0.135893	0.26036	-5.43195	-2.28968	22.4641	-3.49033	0.00905527	0.0877579	-2.72394	NPC.iPS	Neu.iPS	Neu.NPC
Q14318;Q14318-2	Peptidyl-prolyl cis-trans isomerase FKBP8	FKBP8	22.8742	22.3384	22.4678	21.8138		22.3224			21.872	3	9.7	anatomical structure development;apoptosis;biological regulation;camera-type eye development;cell death;cell fate specification;cell surface receptor linked signaling pathway;cellular developmental process;cellular macromolecule metabolic process;cellular metabolic process;cellular process;cellular protein metabolic process;cellular response to stimulus;chaperone-mediated protein folding;death;de…	binding;catalytic activity;cation binding;cis-trans isomerase activity;drug binding;FK56 binding;identical protein binding;ion binding;isomerase activity;macrolide binding;metal ion binding;peptidyl-prolyl cis-trans isomerase activity;protein binding	cell part;cytoplasmic part;endoplasmic reticulum membrane;endoplasmic reticulum part;integral to endoplasmic reticulum membrane;integral to membrane;integral to organelle membrane;intracellular organelle part;intracellular part;intrinsic to endoplasmic reticulum membrane;intrinsic to membrane;intrinsic to organelle membrane;membrane;membrane part;mitochondrial membrane;mitochondrial part;organell…		-0.492048	22.3633	-1.33576	0.226071	0.461749	-5.83702	-0.688193	22.3881	-1.36927	0.217113	0.35809	-5.59995	-0.196145	22.0027	-0.324356	0.760169	0.881164	-6.27178	NPC.iPS	Neu.iPS	Neu.NPC
A8MVW0	Protein FAM171A2	FAM171A2	20.0246	20.3014	20.8264	22.2879				20.8926	20.8385	3	4.1			cell part;extracellular membrane-bounded organelle;extracellular organelle;extracellular region part;extracellular vesicular exosome;integral to membrane;intrinsic to membrane;membrane part;membrane-bounded organelle;membrane-bounded vesicle;organelle;vesicle		1.90375	20.8601	3.6832	0.0117685	0.0936308	-2.62014	0.481397	20.5767	1.21702	0.261045	0.412296	-6.00378	-1.42235	21.3396	-2.50215	0.0596545	0.239738	-4.0509	NPC.iPS	Neu.iPS	Neu.NPC
Q14344-2;Q14344	Guanine nucleotide-binding protein subunit alpha-13	GNA13	21.5128	21.8085	20.9308	21.5992		21.1233	21.2119	21.5056		3	17.4	activation of adenylate cyclase activity;activation of adenylate cyclase activity by G-protein signaling pathway;activation of phospholipase D activity;anatomical structure morphogenesis;biological regulation;blood coagulation;branching morphogenesis of a tube;calcium ion homeostasis;cAMP-mediated signaling;cation homeostasis;cell activation;cell differentiation;cell surface receptor linked signa…	angiotensin receptor binding;binding;catalytic activity;cation binding;D5 dopamine receptor binding;dopamine receptor binding;G-protein beta/gamma-subunit complex binding;G-protein-coupled receptor binding;GTP binding;GTPase activity;guanyl nucleotide binding;guanyl ribonucleotide binding;hydrolase activity;hydrolase activity, acting on acid anhydrides;hydrolase activity, acting on acid anhydride…	adherens junction;anchoring junction;brush border membrane;cell junction;cell part;cell projection membrane;cell projection part;cell-substrate adherens junction;cell-substrate junction;cytoplasmic membrane-bounded vesicle;cytoplasmic part;cytoplasmic vesicle;extracellular membrane-bounded organelle;extracellular organelle;extracellular region part;extracellular vesicular exosome;extrinsic to int…	Long-term depression;Regulation of actin cytoskeleton;Vascular smooth muscle contraction	-0.056145	21.3949	-0.138459	0.894028	0.948905	-6.72124	-0.058655	21.3939	-0.142792	0.890272	0.928506	-6.74762	-0.00251	21.36	-0.00555128	0.995766	0.997036	-6.53086	NPC.iPS	Neu.iPS	Neu.NPC
Q14353;Q14353-2	Guanidinoacetate N-methyltransferase	GAMT		20.1168		21.3546	21.4094		21.1009	21.4329	21.3534	1	8.9	amine biosynthetic process;amine metabolic process;anatomical structure morphogenesis;biological regulation;biosynthetic process;carboxylic acid biosynthetic process;carboxylic acid metabolic process;cellular amine metabolic process;cellular amino acid biosynthetic process;cellular amino acid metabolic process;cellular biosynthetic process;cellular ketone metabolic process;cellular metabolic proc…	catalytic activity;guanidinoacetate N-methyltransferase activity;methyltransferase activity;S-adenosylmethionine-dependent methyltransferase activity;transferase activity;transferase activity, transferring one-carbon groups	cell part;cytoplasmic part;cytosol;extracellular membrane-bounded organelle;extracellular organelle;extracellular region part;extracellular vesicular exosome;intracellular part;membrane-bounded organelle;membrane-bounded vesicle;organelle;vesicle	Arginine and proline metabolism;Glycine, serine and threonine metabolism	1.26518	20.9603	2.49136	0.059721	0.220488	-4.14714	1.17894	21.001	2.44488	0.0477061	0.123398	-4.15991	-0.08624	21.3302	-0.237318	0.819705	0.911966	-6.58852	NPC.iPS	Neu.iPS	Neu.NPC
Q14444-2;Q14444;G3V153;A0A087X082;E9PLA9	Caprin-1	CAPRIN1	25.8451	25.746	24.9241	25.0491	26.0658	24.9116	24.8871	24.4711	25.5787	9	16.1	biological regulation;negative regulation of biological process;negative regulation of biosynthetic process;negative regulation of cellular biosynthetic process;negative regulation of cellular macromolecule biosynthetic process;negative regulation of cellular metabolic process;negative regulation of cellular process;negative regulation of cellular protein metabolic process;negative regulation of …	binding;nucleic acid binding;RNA binding	cell part;cell projection;cytoplasm;cytoplasmic mRNA processing body;cytoplasmic part;cytosol;dendrite;integral to membrane;integral to plasma membrane;intracellular non-membrane-bounded organelle;intracellular organelle;intracellular part;intrinsic to membrane;intrinsic to plasma membrane;macromolecular complex;membrane;membrane part;neuron projection;non-membrane-bounded organelle;organelle;pla…		-0.162893	25.4236	-0.379614	0.714665	0.845747	-6.7624	-0.5261	25.242	-1.26063	0.24138	0.387993	-6.06427	-0.363207	25.1606	-0.78834	0.454664	0.709324	-6.39674	NPC.iPS	Neu.iPS	Neu.NPC
Q14451-4;Q14451;Q14451-3	Growth factor receptor-bound protein 7	GRB7			20.2822							1	3	biological regulation;blood coagulation;cell migration;cell motility;cell surface receptor linked signaling pathway;cellular component assembly;cellular component assembly at cellular level;cellular component movement;cellular component organization;cellular component organization at cellular level;cellular component organization or biogenesis;cellular component organization or biogenesis at cell…	binding;binding, bridging;enzyme binding;identical protein binding;kinase binding;lipid binding;nucleic acid binding;phosphatidylinositol binding;phospholipid binding;protein binding;protein binding, bridging;protein kinase binding;RNA binding;SH3/SH2 adaptor activity;signaling adaptor activity	adherens junction;anchoring junction;cell junction;cell part;cell projection;cell-substrate adherens junction;cell-substrate junction;cytoplasmic part;cytosol;focal adhesion;intracellular non-membrane-bounded organelle;intracellular organelle;intracellular part;macromolecular complex;membrane;non-membrane-bounded organelle;organelle;plasma membrane;ribonucleoprotein complex;RNA granule;stress gra…																				NPC.iPS	Neu.iPS	Neu.NPC
A0A087WSW7;F6XU50;Q9NRZ9-6;Q9NRZ9-5;Q9NRZ9-4;Q9NRZ9-3;Q9NRZ9-2;Q9NRZ9	Lymphoid-specific helicase	HELLS	22.5848	22.7698	23.087			21.1355		20.7387		4	7.3	biological regulation;biosynthetic process;cell activation;cell cycle phase;cell cycle process;cell division;cell proliferation;cellular biosynthetic process;cellular component assembly;cellular component assembly at cellular level;cellular component organization;cellular component organization at cellular level;cellular component organization or biogenesis;cellular component organization or biog…	adenyl nucleotide binding;adenyl ribonucleotide binding;ATP binding;binding;catalytic activity;DNA binding;helicase activity;hydrolase activity;hydrolase activity, acting on acid anhydrides;hydrolase activity, acting on acid anhydrides, in phosphorus-containing anhydrides;nucleic acid binding;nucleoside-triphosphatase activity;nucleotide binding;purine nucleotide binding;purine ribonucleoside tri…	cell part;centromeric heterochromatin;chromatin;chromosomal part;chromosome, centromeric region;heterochromatin;intracellular membrane-bounded organelle;intracellular organelle;intracellular organelle part;intracellular part;membrane-bounded organelle;nucleus;organelle;organelle part		-1.6784	22.3943	-3.58982	0.0130819	0.0982984	-2.73039	-2.07518	22.2951	-4.1762	0.00508824	0.0257929	-1.87063	-0.39678	20.9371	-0.533656	0.62557	0.812138	-6.02614	NPC.iPS	Neu.iPS	Neu.NPC
Q14498-3;Q14498-2;Q14498;H0Y4X3;G3XAC6	RNA-binding protein 39	RBM39	24.246	24.5471	24.6516	23.4209	24.1338	24.4005	23.6854	24.3254	23.5937	10	23.8	biological regulation;biosynthetic process;cellular biosynthetic process;cellular macromolecule biosynthetic process;cellular macromolecule metabolic process;cellular metabolic process;cellular nitrogen compound metabolic process;cellular process;macromolecule biosynthetic process;macromolecule metabolic process;metabolic process;mRNA metabolic process;mRNA processing;nitrogen compound metabolic …	binding;nucleic acid binding;nucleotide binding;RNA binding	cell part;cytoplasmic part;cytoskeletal part;cytoskeleton;intracellular membrane-bounded organelle;intracellular non-membrane-bounded organelle;intracellular organelle;intracellular organelle part;intracellular part;membrane;membrane-bounded organelle;microtubule cytoskeleton;microtubule organizing center;non-membrane-bounded organelle;nuclear body;nuclear part;nuclear speck;nucleoplasm;nucleopla…		-0.496477	24.2333	-1.42104	0.195186	0.427593	-5.84181	-0.6134	24.1748	-1.80043	0.107755	0.221067	-5.35471	-0.116923	23.9266	-0.292418	0.777883	0.891409	-6.68263	NPC.iPS	Neu.iPS	Neu.NPC
Q14554	Protein disulfide-isomerase A5	PDIA5	20.3145	19.6718	19.3813	19.8431		20.4984			18.7717	4	12.1	biological regulation;cell redox homeostasis;cellular homeostasis;cellular macromolecule metabolic process;cellular metabolic process;cellular process;cellular protein metabolic process;cellular response to chemical stimulus;cellular response to organic substance;cellular response to stimulus;cellular response to stress;cellular response to topologically incorrect protein;cellular response to unf…	catalytic activity;intramolecular oxidoreductase activity;intramolecular oxidoreductase activity, interconverting keto- and enol-groups;intramolecular oxidoreductase activity, transposing S-S bonds;isomerase activity;oxidoreductase activity;protein disulfide isomerase activity	cell part;cytoplasmic part;endoplasmic reticulum;endoplasmic reticulum lumen;endoplasmic reticulum membrane;endoplasmic reticulum part;intracellular membrane-bounded organelle;intracellular organelle;intracellular organelle lumen;intracellular organelle part;intracellular part;membrane;membrane part;membrane-bounded organelle;membrane-enclosed lumen;organelle;organelle lumen;organelle membrane;or…		0.381547	19.9418	0.888057	0.405867	0.629655	-6.30934	-1.0175	19.5348	-1.81235	0.116897	0.233893	-5.03501	-1.39905	19.7044	-2.22859	0.0821571	0.295841	-4.37998	NPC.iPS	Neu.iPS	Neu.NPC
Q14566	DNA replication licensing factor MCM6	MCM6	25.4228	25.5158	26.2714	24.7021	23.8877	24.6592	22.7287	24.5427	22.5739	16	23.1	biosynthetic process;cell cycle;cell cycle process;cellular biosynthetic process;cellular macromolecule biosynthetic process;cellular macromolecule metabolic process;cellular metabolic process;cellular nitrogen compound metabolic process;cellular process;DNA conformation change;DNA duplex unwinding;DNA geometric change;DNA metabolic process;DNA replication;DNA strand elongation;DNA strand elongat…	adenyl nucleotide binding;adenyl ribonucleotide binding;ATP binding;binding;catalytic activity;DNA binding;DNA helicase activity;helicase activity;hydrolase activity;hydrolase activity, acting on acid anhydrides;hydrolase activity, acting on acid anhydrides, in phosphorus-containing anhydrides;identical protein binding;nucleic acid binding;nucleoside-triphosphatase activity;nucleotide binding;pro…	cell part;chromosomal part;intracellular membrane-bounded organelle;intracellular organelle;intracellular organelle part;intracellular part;macromolecular complex;MCM complex;membrane-bounded organelle;nuclear chromosome part;nuclear part;nucleoplasm;nucleoplasm part;nucleus;organelle;organelle part;protein complex	Cell cycle;Cell cycle - yeast;DNA replication;Meiosis - yeast	-1.32031	25.0765	-3.47662	0.00912342	0.0815433	-2.82976	-2.4549	24.5092	-4.41813	0.00198951	0.0148234	-1.34102	-1.13459	23.849	-1.95666	0.0884686	0.307499	-5.00744	NPC.iPS	Neu.iPS	Neu.NPC
Q14573	Inositol 1,4,5-trisphosphate receptor type 3	ITPR3	20.0288	20.8241	21.4719		21.6146	19.9593	20.0787	20.57	19.899	3	1	activation of immune response;activation of innate immune response;activation of phospholipase C activity;apoptosis;apoptosis in response to endoplasmic reticulum stress;behavior;biological regulation;blood coagulation;calcium ion homeostasis;calcium ion transport;calcium ion transport into cytosol;cation homeostasis;cation transport;cell activation;cell death;cell surface receptor linked signali…	alcohol binding;binding;calcium channel activity;calcium channel inhibitor activity;calcium channel regulator activity;calcium ion transmembrane transporter activity;calcium-release channel activity;cation channel activity;cation transmembrane transporter activity;channel activity;channel inhibitor activity;channel regulator activity;divalent inorganic cation transmembrane transporter activity;ga…	apical part of cell;brush border;calcineurin complex;cell body;cell cortex;cell part;cell projection;cytoplasm;cytoplasmic part;cytoplasmic vesicle membrane;cytoplasmic vesicle part;cytoskeletal part;endoplasmic reticulum;endoplasmic reticulum membrane;endoplasmic reticulum part;integral to membrane;integral to plasma membrane;intracellular membrane-bounded organelle;intracellular non-membrane-bo…	Alzheimer's disease;Calcium signaling pathway;Gap junction;Gastric acid secretion;GnRH signaling pathway;Huntington's disease;Long-term depression;Long-term potentiation;Oocyte meiosis;Pancreatic secretion;Phosphatidylinositol signaling system;Salivary secretion;Taste transduction;Vascular smooth muscle contraction	0.0120117	20.7798	0.0188518	0.985519	0.992261	-6.73192	-0.592387	20.4788	-1.37355	0.205176	0.343053	-5.92814	-0.604398	20.4243	-1.05135	0.330556	0.603457	-6.0425	NPC.iPS	Neu.iPS	Neu.NPC
Q14576-2;Q14576	ELAV-like protein 3	ELAVL3				20.5737	21.9032	22.576	24.5169	24.3859	25.3306	3	10.8	anatomical structure development;cell differentiation;cellular developmental process;cellular process;developmental process;nervous system development;system development	AU-rich element binding;binding;nucleic acid binding;nucleotide binding;RNA binding															3.06017	23.2144	5.43514	0.00076794	0.0250593	-0.167236	NPC.iPS	Neu.iPS	Neu.NPC
Q14651	Plastin-1	PLS1	22.0672	21.8919	23.5283	21.1174						3	7.2	biological regulation;positive regulation of biological process;positive regulation of cellular component organization;positive regulation of cellular process;positive regulation of establishment of protein localization in plasma membrane;regulation of biological process;regulation of cellular component organization;regulation of cellular localization;regulation of cellular process;regulation of …	actin binding;actin filament binding;binding;calcium ion binding;cation binding;cytoskeletal protein binding;ion binding;metal ion binding;protein binding;structural constituent of cytoskeleton;structural molecule activity	brush border;cell part;cell projection;cytoplasm;extracellular membrane-bounded organelle;extracellular organelle;extracellular region part;extracellular vesicular exosome;intracellular part;membrane-bounded organelle;membrane-bounded vesicle;organelle;vesicle		-1.37836	22.1512	-1.81861	0.122684	0.329442	-5.013													NPC.iPS	Neu.iPS	Neu.NPC
Q49AN9;F5H013;P62308;A8MWD9;C9JVQ0	Small nuclear ribonucleoprotein G;Putative small nuclear ribonucleoprotein G-like protein 15	SNRPG;SNRPGP15	24.9557	24.2639	24.8504	24.2442	24.7819	24.3918	23.7393	23.5827	24.1381	2	31.2	biosynthetic process;cellular biosynthetic process;cellular component assembly;cellular component assembly at cellular level;cellular component organization;cellular component organization at cellular level;cellular component organization or biogenesis;cellular component organization or biogenesis at cellular level;cellular macromolecular complex assembly;cellular macromolecular complex subunit o…	binding;nucleic acid binding;RNA binding	catalytic step 2 spliceosome;cell part;cytoplasmic part;cytosol;intracellular organelle part;intracellular part;macromolecular complex;methylosome;methyltransferase complex;nuclear part;nucleoplasm;organelle part;protein complex;ribonucleoprotein complex;small nuclear ribonucleoprotein complex;small nucleolar ribonucleoprotein complex;SMN-Sm protein complex;spliceosomal complex;U1 snRNP;U12-type …	Spliceosome	-0.217353	24.5813	-0.664082	0.526354	0.717258	-6.60244	-0.869933	24.255	-2.52296	0.0343756	0.0994817	-4.25633	-0.65258	24.1463	-1.92963	0.0921558	0.313781	-5.04621	NPC.iPS	Neu.iPS	Neu.NPC
Q14677-2;Q14677;Q14677-3	Clathrin interactor 1	CLINT1	21.6976	21.189		20.8225	22.0816		20.4063		20.6997	3	8.3	cellular component assembly;cellular component assembly at cellular level;cellular component organization;cellular component organization at cellular level;cellular component organization or biogenesis;cellular component organization or biogenesis at cellular level;cellular macromolecular complex assembly;cellular macromolecular complex subunit organization;cellular membrane organization;cellular…	binding;clathrin binding;lipid binding;protein binding	cell part;clathrin-coated vesicle;coated vesicle;cytoplasmic membrane-bounded vesicle;cytoplasmic part;cytoplasmic vesicle;cytosol;Golgi apparatus;intracellular membrane-bounded organelle;intracellular organelle;intracellular organelle part;intracellular part;membrane;membrane-bounded organelle;membrane-bounded vesicle;nuclear part;nucleoplasm;organelle;organelle part;perinuclear region of cytopl…		0.008765	21.4477	0.0158341	0.987919	0.992562	-6.6422	-0.89025	20.9982	-2.03186	0.0855727	0.187175	-4.86519	-0.899015	21.0025	-1.57034	0.171757	0.436772	-5.35716	NPC.iPS	Neu.iPS	Neu.NPC
Q14683;G8JLG1	Structural maintenance of chromosomes protein 1A;Structural maintenance of chromosomes protein	SMC1A	23.5055	23.7696	22.3217	23.9767	24.1305	23.8601	23.1444	22.6234	22.0872	6	5.8	biological regulation;cell cycle;cell cycle checkpoint;cell cycle phase;cell cycle process;cell division;cellular component organization;cellular component organization at cellular level;cellular component organization or biogenesis;cellular component organization or biogenesis at cellular level;cellular macromolecule metabolic process;cellular metabolic process;cellular nitrogen compound metabol…	adenyl nucleotide binding;adenyl ribonucleotide binding;ATP binding;binding;catalytic activity;chromatin binding;hydrolase activity;hydrolase activity, acting on acid anhydrides;hydrolase activity, acting on acid anhydrides, in phosphorus-containing anhydrides;microtubule motor activity;motor activity;nucleoside-triphosphatase activity;nucleotide binding;protein binding;protein dimerization activ…	cell part;chromosomal part;chromosome;chromosome, centromeric region;cohesin complex;cohesin core heterodimer;condensed chromosome;condensed chromosome kinetochore;condensed nuclear chromosome;cytoplasm;cytoplasmic part;cytosol;intracellular membrane-bounded organelle;intracellular non-membrane-bounded organelle;intracellular organelle;intracellular organelle part;intracellular part;kinetochore;m…	Cell cycle;Cell cycle - yeast;Meiosis - yeast;Oocyte meiosis	0.79017	23.5941	1.87782	0.0993482	0.292456	-5.22596	-0.58064	22.9086	-1.23036	0.251954	0.401177	-6.09944	-1.37081	23.3037	-3.67679	0.0069784	0.0751293	-2.45493	NPC.iPS	Neu.iPS	Neu.NPC
Q14684-2;Q14684	Ribosomal RNA processing protein 1 homolog B	RRP1B	22.7598	22.4788	22.4577	22.4504	21.9173	22.1593	22.0221	21.8026		3	5.9	biological regulation;cellular macromolecule metabolic process;cellular metabolic process;cellular nitrogen compound metabolic process;cellular process;macromolecule metabolic process;metabolic process;ncRNA metabolic process;ncRNA processing;negative regulation of catalytic activity;negative regulation of hydrolase activity;negative regulation of molecular function;negative regulation of phospha…		cell part;chromatin;chromosomal part;cytoplasmic part;cytosol;euchromatin;heterochromatin;intracellular membrane-bounded organelle;intracellular non-membrane-bounded organelle;intracellular organelle;intracellular organelle part;intracellular part;macromolecular complex;membrane-bounded organelle;non-membrane-bounded organelle;nuclear part;nucleolus;nucleus;organelle;organelle part;preribosome;pr…		-0.389787	22.3705	-1.32453	0.223938	0.460188	-5.96021	-0.65309	22.3042	-1.82537	0.108471	0.221568	-5.22271	-0.263303	22.0703	-0.690298	0.51386	0.749312	-6.35982	NPC.iPS	Neu.iPS	Neu.NPC
A0A087X1B2;B9A018;Q53GS9-2;Q53GS9;Q53GS9-3	U4/U6.U5 tri-snRNP-associated protein 2	USP39	22.0567	21.7192	21.4796			22.2082				3	10.3	catabolic process;cell cycle;cell division;cellular catabolic process;cellular component assembly;cellular component assembly at cellular level;cellular component organization;cellular component organization at cellular level;cellular component organization or biogenesis;cellular component organization or biogenesis at cellular level;cellular macromolecular complex assembly;cellular macromolecula…	binding;cation binding;ion binding;metal ion binding;transition metal ion binding;zinc ion binding	cell part;intracellular organelle part;intracellular part;macromolecular complex;nuclear part;organelle part;ribonucleoprotein complex;spliceosomal complex	Spliceosome	0.45639	21.8659	0.95589	0.378783	0.607648	-6.01414													NPC.iPS	Neu.iPS	Neu.NPC
Q14690	Protein RRP5 homolog	PDCD11	22.1264	21.5337	21.8962	19.3818		20.3493	20.0491	20.5304		5	3.3	cellular macromolecule metabolic process;cellular metabolic process;cellular nitrogen compound metabolic process;cellular process;macromolecule metabolic process;maturation of 5.8S rRNA;maturation of 5.8S rRNA from tricistronic rRNA transcript (SSU-rRNA, 5.8S rRNA, LSU-rRNA);maturation of SSU-rRNA;maturation of SSU-rRNA from tricistronic rRNA transcript (SSU-rRNA, 5.8S rRNA, LSU-rRNA);metabolic p…	binding;protein binding;transcription factor binding	cell part;cytoplasmic part;cytosol;intracellular membrane-bounded organelle;intracellular non-membrane-bounded organelle;intracellular organelle;intracellular organelle part;intracellular part;macromolecular complex;membrane-bounded organelle;non-membrane-bounded organelle;nuclear part;nucleolus;nucleus;organelle;organelle part;preribosome;ribonucleoprotein complex;small-subunit processome		-1.98657	21.0575	-4.66303	0.00273108	0.0430527	-1.37473	-1.56235	21.2272	-4.00625	0.00461006	0.0239907	-2.03578	0.424215	20.0777	0.798805	0.45745	0.710616	-6.18204	NPC.iPS	Neu.iPS	Neu.NPC
Q14694;Q14694-3;Q14694-2;J3KT19	Ubiquitin carboxyl-terminal hydrolase 10	USP10	22.9135	23.1846	23.6723	23.4995	22.1863	23.3995	22.9873	22.1697	22.1307	8	15.5	autophagy;biological regulation;biosynthetic process;catabolic process;cellular biosynthetic process;cellular catabolic process;cellular macromolecule biosynthetic process;cellular macromolecule catabolic process;cellular macromolecule metabolic process;cellular metabolic process;cellular nitrogen compound metabolic process;cellular process;cellular protein metabolic process;cellular response to …	binding;catalytic activity;cysteine-type endopeptidase activity;cysteine-type peptidase activity;endopeptidase activity;hydrolase activity;ion channel binding;p53 binding;peptidase activity;peptidase activity, acting on L-amino acid peptides;protein binding;small conjugating protein-specific protease activity;ubiquitin-specific protease activity	cell part;cytoplasm;cytoplasmic part;early endosome;endosome;intracellular membrane-bounded organelle;intracellular organelle;intracellular organelle part;intracellular part;membrane-bounded organelle;nuclear part;nucleoplasm;nucleus;organelle;organelle part		-0.22835	23.1426	-0.524887	0.614689	0.781216	-6.69085	-0.827547	22.843	-2.17735	0.0595781	0.142829	-4.79435	-0.599197	22.7288	-1.2702	0.241956	0.514598	-5.91483	NPC.iPS	Neu.iPS	Neu.NPC
Q14696	LDLR chaperone MESD	MESDC2	22.993	23.34	22.6171	23.4914	23.788	23.1015	23.089	23.3935	23.8087	3	17.9	anatomical structure development;biological regulation;cell surface receptor linked signaling pathway;cellular localization;cellular macromolecule localization;cellular macromolecule metabolic process;cellular metabolic process;cellular process;cellular protein localization;cellular protein metabolic process;cellular response to stimulus;developmental process;localization;macromolecule localizati…		cell part;cytoplasmic part;endoplasmic reticulum;intracellular membrane-bounded organelle;intracellular organelle;intracellular part;membrane;membrane-bounded organelle;organelle;plasma membrane		0.476947	23.2218	1.41904	0.195746	0.428422	-5.84431	0.447043	23.2069	1.26293	0.240594	0.387293	-6.06158	-0.0299033	23.4453	-0.0828302	0.936152	0.970778	-6.7263	NPC.iPS	Neu.iPS	Neu.NPC
Q14697;Q14697-2;F5H6X6;E9PKU7	Neutral alpha-glucosidase AB	GANAB	27.2745	27.2752	27.5678	27.7021	27.1793	28.043	28.1525	28.4161	27.2837	37	52.9	carbohydrate metabolic process;cellular carbohydrate metabolic process;cellular macromolecule metabolic process;cellular metabolic process;cellular process;cellular protein metabolic process;glycosylation;macromolecule glycosylation;macromolecule metabolic process;macromolecule modification;metabolic process;peptidyl-amino acid modification;peptidyl-asparagine modification;post-translational prot…	alpha-glucosidase activity;binding;carbohydrate binding;catalytic activity;glucan 1,3-alpha-glucosidase activity;glucosidase activity;hydrolase activity;hydrolase activity, acting on glycosyl bonds;hydrolase activity, hydrolyzing O-glycosyl compounds	cell part;cytoplasmic membrane-bounded vesicle;cytoplasmic part;cytoplasmic vesicle;endoplasmic reticulum lumen;endoplasmic reticulum part;extracellular membrane-bounded organelle;extracellular organelle;extracellular region part;extracellular vesicular exosome;glucosidase II complex;Golgi apparatus;intracellular membrane-bounded organelle;intracellular organelle;intracellular organelle lumen;int…	N-Glycan biosynthesis;Protein processing in endoplasmic reticulum	0.269007	27.507	0.820731	0.436894	0.652018	-6.48127	0.578257	27.6616	1.52317	0.16449	0.29358	-5.73676	0.30925	27.7961	0.724771	0.490557	0.733034	-6.44661	NPC.iPS	Neu.iPS	Neu.NPC
Q14739;C9JXK0	Lamin-B receptor	LBR	23.2731	23.4423	23.6647	23.5126	24.659	24.9522	23.4666	23.797	21.4872	5	14.3	alcohol metabolic process;biosynthetic process;cholesterol biosynthetic process;cholesterol metabolic process;lipid biosynthetic process;lipid metabolic process;metabolic process;primary metabolic process;small molecule metabolic process;steroid biosynthetic process;steroid metabolic process;sterol biosynthetic process;sterol metabolic process	binding;catalytic activity;chromo shadow domain binding;DNA binding;lamin binding;nucleic acid binding;oxidoreductase activity;oxidoreductase activity, acting on the CH-CH group of donors;oxidoreductase activity, acting on the CH-CH group of donors, NAD or NADP as acceptor;protein binding;protein domain specific binding	cell part;envelope;integral to membrane;integral to nuclear inner membrane;integral to organelle membrane;intracellular organelle part;intracellular part;intrinsic to membrane;intrinsic to nuclear inner membrane;intrinsic to organelle membrane;membrane;membrane part;nuclear envelope;nuclear membrane;nuclear membrane part;nuclear part;organelle envelope;organelle membrane;organelle part		0.914547	23.9173	2.16863	0.0638766	0.23041	-4.80151	-0.543103	23.1885	-0.934218	0.376305	0.525546	-6.40981	-1.45765	23.6458	-2.13535	0.0674736	0.26092	-4.74729	NPC.iPS	Neu.iPS	Neu.NPC
Q14764	Major vault protein	MVP							19.6422	19.0944	17.571	18	30.7	biological regulation;cell proliferation;establishment of localization;establishment of protein localization;establishment of RNA localization;macromolecule metabolic process;metabolic process;mRNA transport;negative regulation of biological process;negative regulation of catalytic activity;negative regulation of cellular metabolic process;negative regulation of cellular process;negative regulati…	binding;enzyme binding;kinase binding;phosphatase binding;protein binding;protein kinase binding;protein phosphatase binding	cell part;cytoplasm;cytoplasmic part;cytoskeleton;extracellular membrane-bounded organelle;extracellular organelle;extracellular region part;extracellular vesicular exosome;intracellular membrane-bounded organelle;intracellular non-membrane-bounded organelle;intracellular organelle;intracellular organelle part;intracellular part;macromolecular complex;membrane;membrane part;membrane-bounded organ…																				NPC.iPS	Neu.iPS	Neu.NPC
Q14847;Q14847-2;C9J9W2;Q14847-3	LIM and SH3 domain protein 1	LASP1	25.4391	25.0686	24.8041	25.9721	25.9376	24.8777	25.4986	25.1842	26.3276	14	44.8	biological regulation;establishment of localization;ion transport;positive regulation of biological process;positive regulation of cell communication;positive regulation of cellular process;positive regulation of response to stimulus;positive regulation of signal transduction;positive regulation of signaling;regulation of biological process;regulation of cell communication;regulation of cellular …	binding;binding, bridging;cation binding;ion binding;ion transmembrane transporter activity;metal ion binding;protein binding;protein binding, bridging;SH3/SH2 adaptor activity;signaling adaptor activity;substrate-specific transmembrane transporter activity;substrate-specific transporter activity;transition metal ion binding;transmembrane transporter activity;transporter activity;zinc ion binding	adherens junction;anchoring junction;cell cortex part;cell junction;cell part;cell-substrate adherens junction;cell-substrate junction;cortical actin cytoskeleton;cortical cytoskeleton;cytoplasmic part;cytoskeletal part;cytoskeleton;extracellular membrane-bounded organelle;extracellular organelle;extracellular region part;extracellular vesicular exosome;focal adhesion;intracellular non-membrane-b…		0.491857	25.3498	1.24861	0.24906	0.486414	-6.04969	0.566207	25.387	1.4363	0.18715	0.322972	-5.84932	0.07435	25.633	0.159683	0.877342	0.942737	-6.71591	NPC.iPS	Neu.iPS	Neu.NPC
A8MXL6;P55735-2;P55735;P55735-3	Protein SEC13 homolog	SEC13	23.706	23.5797	24.5886	23.4598		23.9969	23.1356	23.8834	22.9112	5	24.6	antigen processing and presentation;antigen processing and presentation of exogenous antigen;antigen processing and presentation of exogenous peptide antigen;antigen processing and presentation of exogenous peptide antigen via MHC class II;antigen processing and presentation of peptide antigen;antigen processing and presentation of peptide antigen via MHC class I;antigen processing and presentati…		cell part;coated vesicle membrane;cytoplasmic part;cytoplasmic vesicle membrane;cytoplasmic vesicle part;cytosol;endoplasmic reticulum membrane;endoplasmic reticulum part;envelope;ER to Golgi transport vesicle membrane;extracellular membrane-bounded organelle;extracellular organelle;extracellular region part;extracellular vesicular exosome;Golgi apparatus part;Golgi membrane;intracellular organel…	Protein processing in endoplasmic reticulum;RNA transport	-0.229787	23.8662	-0.521097	0.619406	0.784669	-6.58099	-0.64802	23.6341	-1.55801	0.156111	0.283805	-5.69057	-0.418233	23.4774	-0.914847	0.392903	0.661864	-6.17455	NPC.iPS	Neu.iPS	Neu.NPC
Q14964	Ras-related protein Rab-39A	RAB39A						22.5657	24.1963	24.5445	22.1538	2	11.1	biological regulation;cation homeostasis;cellular cation homeostasis;cellular chemical homeostasis;cellular component organization;cellular component organization at cellular level;cellular component organization or biogenesis;cellular component organization or biogenesis at cellular level;cellular homeostasis;cellular ion homeostasis;cellular monovalent inorganic cation homeostasis;cellular proc…	binding;catalytic activity;GTP binding;GTPase activity;guanyl nucleotide binding;guanyl ribonucleotide binding;hydrolase activity;hydrolase activity, acting on acid anhydrides;hydrolase activity, acting on acid anhydrides, in phosphorus-containing anhydrides;nucleoside-triphosphatase activity;nucleotide binding;purine nucleotide binding;purine ribonucleoside triphosphate binding;purine ribonucleo…	cell part;cytoplasmic membrane-bounded vesicle;cytoplasmic part;cytoplasmic vesicle;cytoplasmic vesicle membrane;cytoplasmic vesicle part;endocytic vesicle;endocytic vesicle membrane;Golgi apparatus;intracellular membrane-bounded organelle;intracellular organelle;intracellular organelle part;intracellular part;membrane;membrane-bounded organelle;membrane-bounded vesicle;organelle;organelle membra…														1.06588	23.3651	1.04406	0.340094	0.612546	-5.82063	NPC.iPS	Neu.iPS	Neu.NPC
Q14966;A0A096LPH6;Q14966-2;Q14966-4;Q14966-3	Zinc finger protein 638	ZNF638	21.7926	20.6749					20.1502			3	1.9	biological regulation;biosynthetic process;cellular biosynthetic process;cellular macromolecule biosynthetic process;cellular macromolecule metabolic process;cellular metabolic process;cellular nitrogen compound metabolic process;cellular process;macromolecule biosynthetic process;macromolecule metabolic process;metabolic process;nitrogen compound metabolic process;nucleic acid metabolic process;…	binding;cation binding;DNA binding;double-stranded DNA binding;ion binding;metal ion binding;nucleic acid binding;nucleotide binding;RNA binding;structure-specific DNA binding;transition metal ion binding;zinc ion binding	cell part;cytoplasm;intracellular membrane-bounded organelle;intracellular organelle;intracellular organelle part;intracellular part;membrane-bounded organelle;nuclear body;nuclear part;nuclear speck;nucleoplasm;nucleoplasm part;nucleus;organelle;organelle part								-1.0836	20.8726	-1.58512	0.169607	0.300428	-5.28266							NPC.iPS	Neu.iPS	Neu.NPC
P06733	Alpha-enolase	ENO1	30.8517	31.014	30.8413	30.8473	31.3669	30.5323	29.2557	28.8113	29.6593	46	87.8	alcohol biosynthetic process;alcohol catabolic process;alcohol metabolic process;biological regulation;biosynthetic process;carbohydrate biosynthetic process;carbohydrate catabolic process;carbohydrate metabolic process;catabolic process;cellular biosynthetic process;cellular carbohydrate biosynthetic process;cellular carbohydrate catabolic process;cellular carbohydrate metabolic process;cellular…	binding;carbon-oxygen lyase activity;catalytic activity;cation binding;DNA binding;enzyme binding;GTPase binding;hydro-lyase activity;ion binding;lyase activity;magnesium ion binding;metal ion binding;nucleic acid binding;nucleic acid binding transcription factor activity;phosphopyruvate hydratase activity;protein binding;protein binding transcription factor activity;sequence-specific DNA binding…	cell part;contractile fiber part;cytoplasm;cytoplasmic part;cytosol;cytosolic part;extracellular membrane-bounded organelle;extracellular organelle;extracellular region part;extracellular space;extracellular vesicular exosome;intracellular membrane-bounded organelle;intracellular organelle;intracellular part;M band;macromolecular complex;membrane;membrane-bounded organelle;membrane-bounded vesicl…	Glycolysis / Gluconeogenesis;Methane metabolism;RNA degradation	0.0131667	30.9089	0.0412288	0.968181	0.985335	-6.84134	-1.66025	30.0722	-4.92041	0.00101348	0.00932803	-0.638886	-1.67341	30.0788	-4.32665	0.00292836	0.0503379	-1.55465	NPC.iPS	Neu.iPS	Neu.NPC
Q14974;Q14974-2;J3KTM9	Importin subunit beta-1	KPNB1	27.5225	27.3352	27.7416	27.2665	27.1586	27.2601	25.8766	26.0212	25.2082	31	49.8	apoptosis;biological regulation;catabolic process;cell death;cell surface receptor linked signaling pathway;cellular catabolic process;cellular component disassembly;cellular component disassembly at cellular level;cellular component disassembly involved in apoptosis;cellular component organization;cellular component organization at cellular level;cellular component organization or biogenesis;cel…	binding;cation binding;enzyme binding;ion binding;metal ion binding;nuclear localization sequence binding;peptide binding;protein binding;protein domain specific binding;protein transporter activity;signal sequence binding;substrate-specific transporter activity;transition metal ion binding;transporter activity;zinc ion binding	cell part;cytoplasm;cytoplasmic part;cytosol;endoplasmic reticulum part;endoplasmic reticulum tubular network;envelope;extracellular membrane-bounded organelle;extracellular organelle;extracellular region part;extracellular vesicular exosome;intracellular organelle part;intracellular part;macromolecular complex;membrane;membrane part;membrane-bounded organelle;membrane-bounded vesicle;nuclear env…	RNA transport	-0.30466	27.3807	-1.09812	0.305869	0.541188	-6.21652	-1.83102	26.6176	-5.2804	0.000639181	0.00688146	-0.158932	-1.52636	26.4652	-4.40333	0.00265414	0.0472722	-1.45256	NPC.iPS	Neu.iPS	Neu.NPC
Q14978-3;S4R341	Nucleolar and coiled-body phosphoprotein 1	NOLC1	25.2431	25.2874	24.5338	23.912	24.2884	24.3504	23.4805	23.1664	24.0859	6	11.1	cell cycle;cell cycle phase;cell cycle process;cellular component organization;cellular component organization at cellular level;cellular component organization or biogenesis;cellular component organization or biogenesis at cellular level;cellular macromolecule metabolic process;cellular metabolic process;cellular nitrogen compound metabolic process;cellular process;macromolecule metabolic proces…	adenyl nucleotide binding;adenyl ribonucleotide binding;ATP binding;binding;GTP binding;guanyl nucleotide binding;guanyl ribonucleotide binding;nucleotide binding;purine nucleotide binding;purine ribonucleoside triphosphate binding;purine ribonucleotide binding;ribonucleotide binding	Cajal body;cell part;cytoplasm;intracellular non-membrane-bounded organelle;intracellular organelle;intracellular organelle part;intracellular part;non-membrane-bounded organelle;nuclear body;nuclear part;nucleolus;nucleoplasm;nucleoplasm part;organelle;organelle part		-0.837877	24.6025	-2.52084	0.0373582	0.173569	-4.27094	-1.44386	24.2995	-3.76682	0.00503943	0.0256007	-2.30508	-0.605983	23.8806	-1.6499	0.140042	0.395441	-5.43557	NPC.iPS	Neu.iPS	Neu.NPC
Q14CX7-2;Q14CX7	N-alpha-acetyltransferase 25, NatB auxiliary subunit	NAA25	19.993	20.1177	20.8115			20.4844				3	4.4			cell part;cytoplasm;cytoplasmic part;Golgi apparatus;intracellular membrane-bounded organelle;intracellular organelle;intracellular organelle part;intracellular part;membrane-bounded organelle;nuclear part;nucleoplasm;organelle;organelle part		0.17704	20.3517	0.334055	0.750563	0.861812	-6.43756													NPC.iPS	Neu.iPS	Neu.NPC
Q15008;Q15008-4;Q15008-3;Q15008-2	26S proteasome non-ATPase regulatory subunit 6	PSMD6	24.3065	24.3801	24.9974	23.7978	23.2631	24.6795	23.4406	24.1767	23.2269	11	34.7	activation of immune response;activation of innate immune response;anaphase-promoting complex-dependent proteasomal ubiquitin-dependent protein catabolic process;antigen processing and presentation;antigen processing and presentation of exogenous antigen;antigen processing and presentation of exogenous peptide antigen;antigen processing and presentation of exogenous peptide antigen via MHC class …	ATPase activity;catalytic activity;hydrolase activity;hydrolase activity, acting on acid anhydrides;hydrolase activity, acting on acid anhydrides, in phosphorus-containing anhydrides;nucleoside-triphosphatase activity;pyrophosphatase activity	cell part;cytoplasmic part;cytosol;extracellular membrane-bounded organelle;extracellular organelle;extracellular region part;extracellular vesicular exosome;intracellular organelle part;intracellular part;macromolecular complex;membrane-bounded organelle;membrane-bounded vesicle;nuclear part;nucleoplasm;organelle;organelle part;proteasome accessory complex;proteasome complex;proteasome regulator…	Proteasome	-0.647837	24.2374	-1.50795	0.172137	0.401574	-5.73116	-0.946597	24.088	-2.47639	0.0370204	0.104809	-4.32962	-0.29876	23.7641	-0.63546	0.544003	0.767602	-6.51047	NPC.iPS	Neu.iPS	Neu.NPC
Q15019;Q15019-3;Q15019-2;B5MCX3;C9JB25;C9J938;C9J2Q4;C9IZU3	Septin-2	SEPTIN2	25.8929	25.9901	26.4106	26.9596	27.0604	26.8386	25.4921	25.8358	26.2413	15	55.1	anatomical structure formation involved in morphogenesis;biological regulation;cell cycle;cell cycle phase;cell cycle process;cell division;cell projection assembly;cell projection organization;cell surface receptor linked signaling pathway;cellular component assembly;cellular component assembly at cellular level;cellular component assembly involved in morphogenesis;cellular component organizatio…	binding;enzyme regulator activity;GTP binding;guanyl nucleotide binding;guanyl ribonucleotide binding;nucleotide binding;purine nucleotide binding;purine ribonucleoside triphosphate binding;purine ribonucleotide binding;ribonucleotide binding	actin cytoskeleton;cell cortex part;cell division site part;cell part;cell projection membrane;cell projection part;chromosomal part;ciliary transition zone;cilium membrane;cilium part;cleavage furrow;condensed chromosome kinetochore;cytoplasm;cytoplasmic part;cytoskeletal part;cytoskeleton;exocyst;extracellular membrane-bounded organelle;extracellular organelle;extracellular region part;extracel…		0.854997	26.5254	2.94038	0.0198872	0.122603	-3.6327	-0.241467	25.9771	-0.702468	0.501416	0.643425	-6.60387	-1.09646	26.4046	-3.25785	0.0126147	0.103963	-3.06499	NPC.iPS	Neu.iPS	Neu.NPC
Q15020-4;Q15020;F8VV04;Q15020-2	Squamous cell carcinoma antigen recognized by T-cells 3	SART3	22.9545	22.9423	24.0431	22.6287	21.256	23.3547	22.3961	23.3115	23.2204	8	13.6	anatomical structure morphogenesis;assembly of spliceosomal tri-snRNP;biological regulation;cell morphogenesis;cell proliferation;cellular component assembly;cellular component assembly at cellular level;cellular component morphogenesis;cellular component organization;cellular component organization at cellular level;cellular component organization or biogenesis;cellular component organization or…	binding;histone binding;nucleic acid binding;nucleotide binding;protein binding;RNA binding;snRNA binding;U4 snRNA binding;U6 snRNA binding;U6atac snRNA binding	Cajal body;cell part;cytoplasm;intracellular;intracellular membrane-bounded organelle;intracellular organelle;intracellular organelle part;intracellular part;membrane-bounded organelle;nuclear body;nuclear part;nuclear speck;nucleoplasm;nucleoplasm part;nucleus;organelle;organelle part		-0.90014	22.8632	-1.5445	0.163198	0.388491	-5.68357	-0.33731	23.1446	-0.778581	0.457629	0.605784	-6.54534	0.56283	22.6946	0.97535	0.359757	0.628508	-6.23017	NPC.iPS	Neu.iPS	Neu.NPC
Q15021	Condensin complex subunit 1	NCAPD2	19.7282	19.4909	20.6702		20.0348					3	3.2	cell cycle;cell cycle process;cell division;cellular component organization;cellular component organization at cellular level;cellular component organization or biogenesis;cellular component organization or biogenesis at cellular level;cellular macromolecule metabolic process;cellular metabolic process;cellular nitrogen compound metabolic process;cellular process;chromosome condensation;chromosom…	binding;histone binding;protein binding	cell part;chromosomal part;chromosome;condensed chromosome;condensin complex;condensin core heterodimer;cytoplasm;cytoplasmic part;cytosol;intracellular membrane-bounded organelle;intracellular non-membrane-bounded organelle;intracellular organelle;intracellular organelle part;intracellular part;macromolecular complex;membrane;membrane-bounded organelle;non-membrane-bounded organelle;nuclear part…	Cell cycle - yeast	0.0717367	19.981	0.117284	0.910752	0.954309	-6.49335													NPC.iPS	Neu.iPS	Neu.NPC
Q15024	Exosome complex component RRP42	EXOSC7	20.5517		20.665			20.3183				1	7.6	catabolic process;cellular catabolic process;cellular macromolecule catabolic process;cellular macromolecule metabolic process;cellular metabolic process;cellular nitrogen compound metabolic process;cellular process;exonucleolytic nuclear-transcribed mRNA catabolic process involved in deadenylation-dependent decay;gene expression;macromolecule catabolic process;macromolecule metabolic process;met…	3'-5' exonuclease activity;3'-5'-exoribonuclease activity;binding;catalytic activity;exonuclease activity;exonuclease activity, active with either ribo- or deoxyribonucleic acids and producing 5'-phosphomonoesters;exoribonuclease activity;exoribonuclease activity, producing 5'-phosphomonoesters;hydrolase activity;hydrolase activity, acting on ester bonds;nuclease activity;nucleic acid binding;rib…	cell part;cytoplasmic part;cytosol;exosome (RNase complex);intracellular membrane-bounded organelle;intracellular non-membrane-bounded organelle;intracellular organelle;intracellular organelle part;intracellular part;macromolecular complex;membrane-bounded organelle;non-membrane-bounded organelle;nuclear part;nucleolus;nucleus;organelle;organelle part;protein complex	RNA degradation	-0.29008	20.5117	-0.569436	0.595923	0.766465	-6.25772													NPC.iPS	Neu.iPS	Neu.NPC
A8MXP9;P43243;D6REM6;D6R991	Matrin-3	MATR3	27.9145	27.8992	27.4485	28.2842	28.8223	28.2928	28.1873	28.1643	28.8286	31	39.6	biological regulation;posttranscriptional regulation of gene expression;regulation of biological process;regulation of gene expression;regulation of macromolecule metabolic process;regulation of metabolic process	binding;cation binding;ion binding;metal ion binding;nucleic acid binding;nucleotide binding;structural molecule activity;transition metal ion binding;zinc ion binding	cell part;intracellular membrane-bounded organelle;intracellular organelle;intracellular organelle part;intracellular part;membrane;membrane-bounded organelle;nuclear inner membrane;nuclear matrix;nuclear membrane;nuclear part;nucleoplasm;nucleus;organelle;organelle inner membrane;organelle membrane;organelle part		0.712373	28.1102	2.27403	0.054393	0.208546	-4.64403	0.639347	28.0737	1.86512	0.0974413	0.205107	-5.26136	-0.0730267	28.4299	-0.203939	0.843819	0.928595	-6.70696	NPC.iPS	Neu.iPS	Neu.NPC
Q15029-2;Q15029;Q15029-3	116 kDa U5 small nuclear ribonucleoprotein component	EFTUD2	25.0408	25.01	25.742	25.3031	25.0645	25.6319	24.7545	25.4544	24.0476	22	32.9	cellular macromolecule metabolic process;cellular metabolic process;cellular nitrogen compound metabolic process;cellular process;gene expression;macromolecule metabolic process;metabolic process;mRNA metabolic process;mRNA processing;nitrogen compound metabolic process;nuclear mRNA splicing, via spliceosome;nucleic acid metabolic process;nucleobase-containing compound metabolic process;primary m…	binding;catalytic activity;GTP binding;GTPase activity;guanyl nucleotide binding;guanyl ribonucleotide binding;hydrolase activity;hydrolase activity, acting on acid anhydrides;hydrolase activity, acting on acid anhydrides, in phosphorus-containing anhydrides;nucleoside-triphosphatase activity;nucleotide binding;purine nucleotide binding;purine ribonucleoside triphosphate binding;purine ribonucleo…	Cajal body;catalytic step 2 spliceosome;cell part;cytoplasm;intracellular organelle part;intracellular part;macromolecular complex;membrane;nuclear body;nuclear part;nuclear speck;nucleoplasm;nucleoplasm part;organelle part;ribonucleoprotein complex;spliceosomal complex	Spliceosome	0.06891	25.2987	0.204493	0.843362	0.920003	-6.81895	-0.512087	25.0082	-1.1758	0.271969	0.422443	-6.16131	-0.580997	25.0427	-1.3386	0.219812	0.488626	-5.83382	NPC.iPS	Neu.iPS	Neu.NPC
P06744;A0A0A0MTS2;P06744-2;K7EQ48	Glucose-6-phosphate isomerase	GPI	27.2528	27.1618	27.8589	26.0058	25.191	26.3949	27.1087	26.3338	25.9541	21	54.7	alcohol biosynthetic process;alcohol catabolic process;alcohol metabolic process;aldehyde biosynthetic process;aldehyde catabolic process;anatomical structure development;anatomical structure formation involved in morphogenesis;angiogenesis;behavior;biological regulation;biosynthetic process;carbohydrate biosynthetic process;carbohydrate catabolic process;carbohydrate metabolic process;catabolic …	binding;carbohydrate binding;catalytic activity;DNA binding;glucose-6-phosphate isomerase activity;intramolecular oxidoreductase activity;intramolecular oxidoreductase activity, interconverting aldoses and ketoses;intramolecular transferase activity;isomerase activity;monosaccharide binding;nucleic acid binding;sequence-specific DNA binding;sugar binding	cell part;cell projection;cytoplasm;cytoplasmic part;cytosol;extracellular membrane-bounded organelle;extracellular organelle;extracellular region part;extracellular space;extracellular vesicular exosome;Golgi apparatus;intracellular membrane-bounded organelle;intracellular organelle;intracellular organelle part;intracellular part;membrane;membrane-bounded organelle;membrane-bounded vesicle;neuro…	Amino sugar and nucleotide sugar metabolism;Glycolysis / Gluconeogenesis;Pentose phosphate pathway;Starch and sucrose metabolism	-1.56059	26.6442	-3.89094	0.00512987	0.0592355	-2.23032	-0.958987	26.945	-2.38526	0.0428012	0.115465	-4.47246	0.601607	26.1647	1.29857	0.232551	0.504952	-5.88156	NPC.iPS	Neu.iPS	Neu.NPC
Q15046;Q15046-2	Lysine--tRNA ligase	KARS	24.5942	24.6656	25.8066	24.4761	22.537	24.4147	21.4329	23.9988	22.5326	15	23.8	amine metabolic process;amino acid activation;biosynthetic process;bis(5'-nucleosidyl) oligophosphate biosynthetic process;bis(5'-nucleosidyl) oligophosphate metabolic process;carboxylic acid metabolic process;cellular amine metabolic process;cellular amino acid metabolic process;cellular biosynthetic process;cellular ketone metabolic process;cellular macromolecule metabolic process;cellular meta…	adenyl nucleotide binding;adenyl ribonucleotide binding;amine binding;amino acid binding;aminoacyl-tRNA ligase activity;ATP binding;binding;carboxylic acid binding;catalytic activity;cation binding;ion binding;ligase activity;ligase activity, forming aminoacyl-tRNA and related compounds;ligase activity, forming carbon-oxygen bonds;lysine-tRNA ligase activity;metal ion binding;nucleic acid binding…	aminoacyl-tRNA synthetase multienzyme complex;cell part;cytoplasm;cytoplasmic part;cytoskeleton;cytosol;extracellular region;intracellular membrane-bounded organelle;intracellular non-membrane-bounded organelle;intracellular organelle;intracellular organelle lumen;intracellular organelle part;intracellular part;macromolecular complex;membrane;membrane-bounded organelle;membrane-enclosed lumen;mic…	Aminoacyl-tRNA biosynthesis	-1.21286	24.4157	-2.00833	0.0815295	0.2607	-5.03766	-2.36737	23.8385	-3.64955	0.00599532	0.0287558	-2.4844	-1.15451	23.232	-1.49533	0.17562	0.441865	-5.63885	NPC.iPS	Neu.iPS	Neu.NPC
Q15050	Ribosome biogenesis regulatory protein homolog	RRS1	23.1425	23.6313	22.6481	22.0683	21.9326	22.0128	19.9784	20.6215	20.5862	5	20.8	cell cycle process;cell differentiation;cellular component biogenesis;cellular component biogenesis at cellular level;cellular component organization or biogenesis;cellular component organization or biogenesis at cellular level;cellular developmental process;cellular process;developmental process;establishment of chromosome localization;establishment of localization;establishment of localization …		cell part;chromosome;condensed chromosome;condensed nuclear chromosome;cytoplasmic part;endoplasmic reticulum;intracellular membrane-bounded organelle;intracellular non-membrane-bounded organelle;intracellular organelle;intracellular organelle part;intracellular part;membrane-bounded organelle;non-membrane-bounded organelle;nuclear chromosome;nuclear part;nucleolus;nucleus;organelle;organelle part		-1.1361	22.5726	-3.38794	0.0103522	0.0896301	-2.96073	-2.74529	21.768	-7.26068	6.8561e-05	0.00169382	2.14922	-1.60919	21.2	-4.84881	0.00152506	0.0365172	-0.877418	NPC.iPS	Neu.iPS	Neu.NPC
Q15056-2;Q15056	Eukaryotic translation initiation factor 4H	EIF4H	24.8051	24.6326	23.7409	24.9046	25.4058	23.3506	24.2114	23.3003	24.6398	9	46.1	biological regulation;biosynthetic process;cellular biosynthetic process;cellular macromolecule biosynthetic process;cellular macromolecule metabolic process;cellular metabolic process;cellular process;cellular protein metabolic process;developmental growth;developmental process;gene expression;growth;macromolecule biosynthetic process;macromolecule metabolic process;metabolic process;posttranscr…	binding;nucleic acid binding;nucleotide binding;RNA binding;translation factor activity, nucleic acid binding;translation initiation factor activity	cell part;cytoplasmic part;cytosol;eukaryotic translation initiation factor 4F complex;intracellular part;macromolecular complex;membrane;perinuclear region of cytoplasm;protein complex		0.1608	24.4733	0.280371	0.786706	0.883076	-6.79852	-0.342377	24.2217	-0.747092	0.47543	0.620597	-6.57019	-0.503177	24.3021	-0.823744	0.435466	0.694329	-6.36743	NPC.iPS	Neu.iPS	Neu.NPC
Q15059;M0QZD9;Q15059-2;O60885-2;O60885-3;O60885	Bromodomain-containing protein 3;Bromodomain-containing protein 4	BRD3;BRD4				21.5044	21.7117	21.3066				2	4.7	biological regulation;biosynthetic process;cell cycle process;cell proliferation;cellular biosynthetic process;cellular component organization;cellular component organization at cellular level;cellular component organization or biogenesis;cellular component organization or biogenesis at cellular level;cellular macromolecule biosynthetic process;cellular macromolecule metabolic process;cellular me…	binding;chromatin binding;DNA binding;histone acetyl-lysine binding;histone binding;nucleic acid binding;p53 binding;protein binding	carboxy-terminal domain protein kinase complex;cell part;chromatin;chromosomal part;chromosome;condensed chromosome;condensed nuclear chromosome;cytoplasm;intracellular membrane-bounded organelle;intracellular non-membrane-bounded organelle;intracellular organelle;intracellular organelle part;intracellular part;macromolecular complex;membrane-bounded organelle;non-membrane-bounded organelle;nucle…																				NPC.iPS	Neu.iPS	Neu.NPC
Q15067-2;Q15067;Q15067-3	Peroxisomal acyl-coenzyme A oxidase 1	ACOX1	21.4296				20.6125	22.514	25.1017	24.5426	22.3141	10	24.5	biological regulation;carboxylic acid catabolic process;carboxylic acid metabolic process;catabolic process;cellular catabolic process;cellular component organization;cellular component organization at cellular level;cellular component organization or biogenesis;cellular component organization or biogenesis at cellular level;cellular ketone metabolic process;cellular lipid catabolic process;cellu…	acyl-CoA dehydrogenase activity;acyl-CoA oxidase activity;binding;carboxylic acid binding;catalytic activity;coenzyme binding;cofactor binding;FAD binding;fatty acid binding;flavin adenine dinucleotide binding;lipid binding;monocarboxylic acid binding;oxidoreductase activity;oxidoreductase activity, acting on the CH-CH group of donors;oxidoreductase activity, acting on the CH-CH group of donors, …	cell part;cytoplasmic part;intracellular membrane-bounded organelle;intracellular non-membrane-bounded organelle;intracellular organelle;intracellular organelle lumen;intracellular organelle part;intracellular part;membrane;membrane-bounded organelle;membrane-enclosed lumen;microbody;microbody lumen;microbody membrane;microbody part;mitochondrion;non-membrane-bounded organelle;nuclear part;nucleo…	alpha-Linolenic acid metabolism;Biosynthesis of unsaturated fatty acids;Fatty acid metabolism;Peroxisome;PPAR signaling pathway	0.13369	21.5187	0.144892	0.890972	0.946859	-6.43131	2.55657	23.347	2.4071	0.0503045	0.127837	-4.2129	2.42288	23.017	2.53629	0.0413146	0.202467	-4.10404	NPC.iPS	Neu.iPS	Neu.NPC
Q15075	Early endosome antigen 1	EEA1	21.4728			22.4258	22.8187	22.3538	23.097	22.0586	22.6848	5	4.3	cellular component organization;cellular component organization at cellular level;cellular component organization or biogenesis;cellular component organization or biogenesis at cellular level;cellular membrane fusion;cellular membrane organization;cellular process;early endosome to late endosome transport;endocytosis;endosome transport;establishment of localization;establishment of localization i…	1-phosphatidylinositol binding;binding;calmodulin binding;cation binding;GTP-dependent protein binding;identical protein binding;ion binding;lipid binding;metal ion binding;phosphatidylinositol binding;phospholipid binding;protein binding;protein dimerization activity;protein homodimerization activity;transition metal ion binding;zinc ion binding	axon part;axonal spine;cell part;cell projection;cell projection part;cytoplasm;cytoplasmic part;cytoplasmic vesicle;cytosol;early endosome;early endosome membrane;endosomal part;endosome;endosome membrane;extracellular membrane-bounded organelle;extracellular organelle;extracellular region part;extracellular vesicular exosome;extrinsic to membrane;extrinsic to plasma membrane;intracellular membr…	Endocytosis;ko5152;Phagosome	1.05992	22.2678	2.27169	0.0669304	0.234221	-4.41408	1.14064	22.3283	1.97331	0.0930038	0.197897	-4.81664	0.08072	22.5731	0.211419	0.838185	0.924123	-6.70523	NPC.iPS	Neu.iPS	Neu.NPC
Q15084-3;Q15084;Q15084-4;Q15084-5;Q15084-2	Protein disulfide-isomerase A6	PDIA6	27.9107	27.9565	27.7403	28.2689	28.2715	28.3453	27.2563	26.4544	27.4731	22	58.4	apoptotic cell clearance;biological regulation;cell redox homeostasis;cellular component organization;cellular component organization or biogenesis;cellular homeostasis;cellular macromolecule metabolic process;cellular membrane organization;cellular metabolic process;cellular process;cellular protein metabolic process;cellular response to chemical stimulus;cellular response to organic substance;c…	catalytic activity;intramolecular oxidoreductase activity;intramolecular oxidoreductase activity, interconverting keto- and enol-groups;intramolecular oxidoreductase activity, transposing S-S bonds;isomerase activity;protein disulfide isomerase activity	cell part;cytoplasmic membrane-bounded vesicle;cytoplasmic part;cytoplasmic vesicle;endoplasmic reticulum;endoplasmic reticulum chaperone complex;endoplasmic reticulum lumen;endoplasmic reticulum membrane;endoplasmic reticulum part;endoplasmic reticulum-Golgi intermediate compartment;extracellular membrane-bounded organelle;extracellular organelle;extracellular region part;extracellular vesicular…	Protein processing in endoplasmic reticulum	0.42603	28.0822	1.59155	0.152312	0.370977	-5.62146	-0.807953	27.4652	-2.22721	0.0550417	0.136557	-4.71777	-1.23398	27.6782	-3.32697	0.011422	0.0993541	-2.96298	NPC.iPS	Neu.iPS	Neu.NPC
Q15102;M0R389;M0R1K3;M0QZT2	Platelet-activating factor acetylhydrolase IB subunit gamma	PAFAH1B3	24.872	24.7581	25.316	25.7684	25.7483	26.1106	28.2203	27.6349	28.1599	12	72.7	anatomical structure development;brain development;catabolic process;developmental process;gamete generation;lipid catabolic process;lipid metabolic process;male gamete generation;metabolic process;multicellular organismal process;multicellular organismal reproductive process;nervous system development;organ development;primary metabolic process;reproductive process;spermatogenesis;system develop…	1-alkyl-2-acetylglycerophosphocholine esterase activity;acetyltransferase activity;binding;carboxylic ester hydrolase activity;catalytic activity;hydrolase activity;hydrolase activity, acting on ester bonds;identical protein binding;platelet-activating factor acetyltransferase activity;protein binding;transferase activity;transferase activity, transferring acyl groups;transferase activity, transf…	cell part;cytoplasm;cytoplasmic part;cytosol;extracellular membrane-bounded organelle;extracellular organelle;extracellular region part;extracellular vesicular exosome;intracellular part;membrane;membrane-bounded organelle;membrane-bounded vesicle;organelle;vesicle	Ether lipid metabolism	0.893733	25.4289	2.95203	0.0195465	0.12136	-3.61503	3.02297	26.4935	8.95118	1.42224e-05	0.000556333	3.73854	2.12924	26.9404	6.36597	0.000283518	0.0161332	0.855741	NPC.iPS	Neu.iPS	Neu.NPC
Q15121;B1AKZ5;Q15121-2	Astrocytic phosphoprotein PEA-15	PEA15	22.1641	21.7453		24.102	25.3657	24.9081	24.3374	23.6378	25.2487	6	58.5	apoptosis;biological regulation;carbohydrate transport;cell cycle checkpoint;cell death;cellular process;cellular response to stimulus;cellular response to stress;death;DNA damage checkpoint;DNA integrity checkpoint;establishment of localization;negative regulation of biological process;negative regulation of glucose import;negative regulation of glucose transport;negative regulation of transport…		cell part;cytoplasm;cytoskeletal part;intracellular organelle part;intracellular part;macromolecular complex;microtubule associated complex;organelle part;protein complex		2.83724	23.657	6.12648	0.000613679	0.0182197	0.182766	2.45329	23.4267	4.6698	0.00198315	0.0148231	-1.15642	-0.38395	24.6	-0.732618	0.486028	0.730953	-6.44065	NPC.iPS	Neu.iPS	Neu.NPC
A8MXQ1;P53801;A8MZH8	Pituitary tumor-transforming gene 1 protein-interacting protein	PTTG1IP				22.2475		21.5331	21.4391	21.7076	20.8979	2	18.9	developmental process;establishment of localization;establishment of localization in cell;establishment of protein localization;intracellular protein transport;intracellular transport;multicellular organismal development;multicellular organismal process;nuclear import;nuclear transport;nucleocytoplasmic transport;protein import;protein import into nucleus;protein targeting;protein transport;trans…	receptor activity	cell part;cytoplasm;extracellular membrane-bounded organelle;extracellular organelle;extracellular region part;extracellular vesicular exosome;integral to membrane;intracellular membrane-bounded organelle;intracellular organelle;intracellular part;intrinsic to membrane;membrane;membrane part;membrane-bounded organelle;membrane-bounded vesicle;nucleus;organelle;vesicle														-0.542102	21.5651	-1.21097	0.268036	0.54136	-5.87216	NPC.iPS	Neu.iPS	Neu.NPC
P06748;P06748-2;P06748-3	Nucleophosmin	NPM1	28.8809	28.5276	28.5186	27.8826	28.3875	27.7203	27.6057	27.2322	27.9467	18	52.7	aging;ATP-dependent chromatin remodeling;biological regulation;cell aging;cell cycle process;cellular component assembly;cellular component assembly at cellular level;cellular component organization;cellular component organization at cellular level;cellular component organization or biogenesis;cellular component organization or biogenesis at cellular level;cellular macromolecular complex assembly…	binding;enzyme binding;enzyme inhibitor activity;enzyme regulator activity;histone binding;identical protein binding;kinase binding;kinase inhibitor activity;kinase regulator activity;NF-kappaB binding;nucleic acid binding;protein binding;protein binding transcription factor activity;protein dimerization activity;protein heterodimerization activity;protein homodimerization activity;protein kinase…	adherens junction;anchoring junction;cell junction;cell part;cell-substrate adherens junction;cell-substrate junction;centrosome;cytoplasm;cytoplasmic part;cytoskeletal part;cytosol;focal adhesion;intracellular membrane-bounded organelle;intracellular non-membrane-bounded organelle;intracellular organelle;intracellular organelle part;intracellular part;macromolecular complex;membrane;membrane-bou…		-0.64555	28.3196	-2.06323	0.0750007	0.24877	-4.95731	-1.04749	28.1186	-3.14617	0.0128881	0.0494253	-3.26934	-0.40194	27.7958	-1.11358	0.299832	0.574536	-6.08966	NPC.iPS	Neu.iPS	Neu.NPC
Q15125;C9J719;C9JJ78	3-beta-hydroxysteroid-Delta(8),Delta(7)-isomerase	EBP	23.0211	22.7373	22.2341	21.4123		20.9385	23.5605	23.8855	21.3869	2	12.2	alcohol metabolic process;anatomical structure development;biological regulation;biosynthetic process;cellular process;cellular response to stimulus;cholesterol biosynthetic process;cholesterol metabolic process;developmental process;drug transmembrane transport;drug transport;establishment of localization;hemopoiesis;hemopoietic or lymphoid organ development;lipid biosynthetic process;lipid meta…	C-8 sterol isomerase activity;catalytic activity;cholestenol delta-isomerase activity;drug transmembrane transporter activity;intramolecular oxidoreductase activity;intramolecular oxidoreductase activity, transposing C=C bonds;isomerase activity;molecular transducer activity;receptor activity;signal transducer activity;signaling receptor activity;steroid delta-isomerase activity;transmembrane sig…	cell part;cytoplasmic part;endoplasmic reticulum;endoplasmic reticulum membrane;endoplasmic reticulum part;integral to membrane;integral to plasma membrane;intracellular membrane-bounded organelle;intracellular organelle;intracellular organelle part;intracellular part;intrinsic to membrane;intrinsic to plasma membrane;membrane;membrane part;membrane-bounded organelle;organelle;organelle membrane;…	Steroid biosynthesis	-1.48876	22.0687	-3.79361	0.00763238	0.073665	-2.45545	0.280123	22.8042	0.441588	0.669952	0.780336	-6.76256	1.76888	22.2367	2.26275	0.060899	0.243493	-4.49259	NPC.iPS	Neu.iPS	Neu.NPC
Q15126	Phosphomevalonate kinase	PMVK	21.0505	21.6614	23.0366	22.3031	22.3215	21.9172	22.9472	23.4969	23.465	5	26	acetyl-CoA metabolic process;alcohol metabolic process;biosynthetic process;cellular biosynthetic process;cellular lipid metabolic process;cellular metabolic process;cellular process;cholesterol biosynthetic process;cholesterol metabolic process;coenzyme metabolic process;cofactor metabolic process;isopentenyl diphosphate biosynthetic process;isopentenyl diphosphate biosynthetic process, mevalona…	adenyl nucleotide binding;adenyl ribonucleotide binding;ATP binding;binding;catalytic activity;kinase activity;nucleotide binding;phosphomevalonate kinase activity;phosphotransferase activity, phosphate group as acceptor;purine nucleotide binding;purine ribonucleoside triphosphate binding;purine ribonucleotide binding;ribonucleotide binding;transferase activity;transferase activity, transferring …	cell part;cytoplasmic part;cytosol;extracellular membrane-bounded organelle;extracellular organelle;extracellular region part;extracellular vesicular exosome;intracellular membrane-bounded organelle;intracellular organelle;intracellular part;membrane;membrane-bounded organelle;membrane-bounded vesicle;microbody;organelle;peroxisome;vesicle	Peroxisome;Terpenoid backbone biosynthesis	0.264427	22.0484	0.517999	0.61926	0.784669	-6.69473	1.38688	22.6096	2.70229	0.0258568	0.0822183	-3.9728	1.12246	22.7418	3.34996	0.0110525	0.0979898	-2.92918	NPC.iPS	Neu.iPS	Neu.NPC
Q15147-2;Q15147;Q15147-5;Q15147-4	1-phosphatidylinositol 4,5-bisphosphate phosphodiesterase beta-4	PLCB4						21.1848	22.792			3	4	biological regulation;catabolic process;cellular process;cellular response to stimulus;inositol phosphate metabolic process;intracellular signal transduction;lipid catabolic process;lipid metabolic process;metabolic process;organophosphate metabolic process;primary metabolic process;regulation of biological process;regulation of cellular process;response to stimulus;signal transduction;small mole…	binding;calcium ion binding;catalytic activity;cation binding;hydrolase activity;hydrolase activity, acting on ester bonds;ion binding;lipase activity;metal ion binding;molecular transducer activity;phosphatidylinositol phospholipase C activity;phospholipase activity;phospholipase C activity;phosphoric diester hydrolase activity;phosphoric ester hydrolase activity;signal transducer activity	cell part;cell projection;cytoplasmic part;cytoskeletal part;cytosol;dendrite;endoplasmic reticulum;intracellular membrane-bounded organelle;intracellular organelle;intracellular organelle part;intracellular part;membrane-bounded organelle;neuron projection;nucleus;organelle;organelle part;postsynaptic density;smooth endoplasmic reticulum;synapse part	African trypanosomiasis;Alzheimer's disease;Amoebiasis;Calcium signaling pathway;Chagas disease (American trypanosomiasis);Chemokine signaling pathway;Endocrine and other factor-regulated calcium reabsorption;Gap junction;Gastric acid secretion;GnRH signaling pathway;Huntington's disease;Inositol phosphate metabolism;Long-term depression;Long-term potentiation;Melanogenesis;Pancreatic secretion;P…													1.60725	21.9884	2.1617	0.106274	0.338999	-4.40528	NPC.iPS	Neu.iPS	Neu.NPC
Q15149;Q15149-7;Q15149-8;Q15149-9;Q15149-5;Q15149-4;Q15149-6	Plectin	PLEC	25.0071	24.8105	23.2846	25.9727	27.2932	27.3048	22.4363	25.1885	26.0118	180	45	apoptosis;cell death;cell junction assembly;cell junction organization;cell-substrate junction assembly;cellular component assembly;cellular component assembly at cellular level;cellular component disassembly;cellular component disassembly at cellular level;cellular component disassembly involved in apoptosis;cellular component organization;cellular component organization at cellular level;cellul…	ankyrin binding;binding;cytoskeletal protein binding;protein binding;structural constituent of muscle;structural molecule activity	adherens junction;anchoring junction;cell junction;cell part;cell-substrate adherens junction;cell-substrate junction;contractile fiber part;costamere;cytoplasm;cytoplasmic part;cytoskeleton;cytosol;extracellular membrane-bounded organelle;extracellular organelle;extracellular region part;extracellular vesicular exosome;focal adhesion;hemidesmosome;intermediate filament cytoskeleton;intracellular…		2.48947	25.6122	4.33985	0.00282819	0.0434261	-1.6074	0.17812	24.4565	0.20136	0.845215	0.903745	-6.84689	-2.31135	25.7012	-2.56369	0.0352263	0.184468	-4.10685	NPC.iPS	Neu.iPS	Neu.NPC
Q15181	Inorganic pyrophosphatase	PPA1	25.4605	25.5423	24.648	25.9094	26.2859	25.3625	25.9747	25.8927	26.5598	12	57.8	amine metabolic process;amino acid activation;carboxylic acid metabolic process;cellular amine metabolic process;cellular amino acid metabolic process;cellular ketone metabolic process;cellular macromolecule metabolic process;cellular metabolic process;cellular nitrogen compound metabolic process;cellular process;diphosphate metabolic process;gene expression;macromolecule metabolic process;metabo…	binding;catalytic activity;cation binding;hydrolase activity;hydrolase activity, acting on acid anhydrides;hydrolase activity, acting on acid anhydrides, in phosphorus-containing anhydrides;inorganic diphosphatase activity;ion binding;magnesium ion binding;metal ion binding;pyrophosphatase activity	cell part;cytoplasm;cytoplasmic part;cytosol;extracellular membrane-bounded organelle;extracellular organelle;extracellular region part;extracellular vesicular exosome;intracellular part;membrane-bounded organelle;membrane-bounded vesicle;organelle;vesicle	Oxidative phosphorylation	0.635707	25.5348	1.64075	0.141645	0.356864	-5.55555	0.925497	25.6797	2.44175	0.0391194	0.108526	-4.38402	0.28979	25.9975	0.753535	0.474091	0.722329	-6.42449	NPC.iPS	Neu.iPS	Neu.NPC
Q15233;Q15233-2;H7C367	Non-POU domain-containing octamer-binding protein	NONO	29.2895	29.1359	29.0065	29.3326	29.9799	29.0792	29.0701	29.5319	29.7041	23	53.9	biological regulation;biosynthetic process;cellular biosynthetic process;cellular macromolecule biosynthetic process;cellular macromolecule metabolic process;cellular metabolic process;cellular nitrogen compound metabolic process;cellular process;cellular response to stimulus;cellular response to stress;circadian rhythm;DNA metabolic process;DNA recombination;DNA repair;macromolecule biosynthetic…	binding;core promoter binding;DNA binding;identical protein binding;nucleic acid binding;nucleotide binding;protein binding;regulatory region DNA binding;regulatory region nucleic acid binding;transcription regulatory region DNA binding	cell part;intracellular membrane-bounded organelle;intracellular non-membrane-bounded organelle;intracellular organelle;intracellular organelle part;intracellular part;membrane;membrane-bounded organelle;non-membrane-bounded organelle;nuclear body;nuclear matrix;nuclear part;nuclear speck;nucleolus;nucleoplasm;nucleoplasm part;nucleus;organelle;organelle part;paraspeckles		0.31998	29.3039	0.962175	0.365701	0.594769	-6.35374	0.291397	29.2896	0.903403	0.391521	0.53929	-6.43827	-0.0285833	29.4496	-0.0754544	0.941825	0.972806	-6.72695	NPC.iPS	Neu.iPS	Neu.NPC
Q15269	Periodic tryptophan protein 2 homolog	PWP2			21.7421			19.7459			19.5592	2	2.7	cellular component assembly;cellular component assembly at cellular level;cellular component organization;cellular component organization at cellular level;cellular component organization or biogenesis;cellular component organization or biogenesis at cellular level;cellular macromolecular complex assembly;cellular macromolecular complex subunit organization;cellular macromolecule metabolic proces…	binding;nucleic acid binding;RNA binding;snoRNA binding	cell part;cytoplasm;intracellular non-membrane-bounded organelle;intracellular organelle;intracellular organelle part;intracellular part;macromolecular complex;non-membrane-bounded organelle;nuclear part;nucleolar part;nucleolus;organelle;organelle part;preribosome;protein complex;Pwp2p-containing subcomplex of 9S preribosome;ribonucleoprotein complex;small-subunit processome	Ribosome biogenesis in eukaryotes	-1.99618	20.744	-3.01124	0.0457975	0.189882	-3.59914	-2.18293	20.6506	-3.14948	0.0303976	0.0920518	-3.32963	-0.18675	19.6525	-0.251172	0.815691	0.910176	-6.15609	NPC.iPS	Neu.iPS	Neu.NPC
Q15276-2;Q15276	Rab GTPase-binding effector protein 1	RABEP1		21.9272			22.2917		21.6849	21.5316	23.3992	9	14.5	apoptosis;cell death;cellular component organization;cellular component organization or biogenesis;cellular membrane organization;cellular process;death;endocytosis;establishment of localization;establishment of protein localization;membrane fusion;membrane invagination;membrane organization;programmed cell death;protein transport;transport;vesicle-mediated transport	binding;enzyme activator activity;enzyme regulator activity;GTPase activator activity;GTPase regulator activity;identical protein binding;nucleoside-triphosphatase regulator activity;protein binding;protein dimerization activity;protein homodimerization activity	cell part;cytoplasmic membrane-bounded vesicle;cytoplasmic part;cytoplasmic vesicle;early endosome;endocytic vesicle;endosome;intracellular membrane-bounded organelle;intracellular organelle;intracellular part;membrane-bounded organelle;membrane-bounded vesicle;organelle;recycling endosome;vesicle	Endocytosis	0.36445	22.1094	0.549773	0.615074	0.781284	-6.12463	0.278053	22.1357	0.339991	0.744768	0.834353	-6.46312	-0.0863967	22.2269	-0.09942	0.924323	0.966814	-6.38483	NPC.iPS	Neu.iPS	Neu.NPC
Q15293;Q15293-2	Reticulocalbin-1	RCN1	24.9298	24.7073	24.2953	26.5647	26.9202	25.6313	25.0178	25.5639	26.2491	8	24.5	anatomical structure development;camera-type eye development;chordate embryonic development;developmental process;embryo development;embryo development ending in birth or egg hatching;eye development;in utero embryonic development;organ development;sensory organ development	binding;calcium ion binding;cation binding;ion binding;metal ion binding	cell part;cytoplasmic part;endoplasmic reticulum;endoplasmic reticulum lumen;endoplasmic reticulum part;intracellular membrane-bounded organelle;intracellular organelle;intracellular organelle lumen;intracellular organelle part;intracellular part;membrane-bounded organelle;membrane-enclosed lumen;organelle;organelle lumen;organelle part		1.72798	25.5081	4.24882	0.00318341	0.0465177	-1.73133	0.96612	25.1272	2.40965	0.0411709	0.112327	-4.43432	-0.761857	25.9912	-1.58037	0.155136	0.415641	-5.52823	NPC.iPS	Neu.iPS	Neu.NPC
Q15365	Poly(rC)-binding protein 1	PCBP1	27.5209	27.4386	27.9342	27.4551	26.9201	27.2742	26.8966	27.1044	26.8693	13	68.3	cellular macromolecule metabolic process;cellular metabolic process;cellular nitrogen compound metabolic process;cellular process;gene expression;macromolecule metabolic process;metabolic process;mRNA metabolic process;mRNA processing;nitrogen compound metabolic process;nuclear mRNA splicing, via spliceosome;nucleic acid metabolic process;nucleobase-containing compound metabolic process;primary m…	binding;DNA binding;nucleic acid binding;RNA binding;single-stranded DNA binding;structure-specific DNA binding	cell part;cytoplasm;extracellular membrane-bounded organelle;extracellular organelle;extracellular region part;extracellular vesicular exosome;intracellular membrane-bounded organelle;intracellular organelle;intracellular organelle part;intracellular part;macromolecular complex;membrane;membrane-bounded organelle;membrane-bounded vesicle;nuclear part;nucleoplasm;organelle;organelle part;ribonucle…	Spliceosome	-0.414747	27.4239	-1.34908	0.216294	0.45307	-5.93056	-0.67449	27.294	-2.15898	0.0613395	0.146008	-4.82243	-0.259743	27.0866	-0.812527	0.441487	0.701538	-6.37684	NPC.iPS	Neu.iPS	Neu.NPC
P06753-2;A0A087WWU8;P06753-6;Q5VU59;Q5VU61;J3KN67		TPM3;DKFZp686J1372	27.0189	27.2594	27.012	26.9176	27.5646	25.9473	25.2711	25.3052	26.384	20	56	actin filament-based movement;actin filament-based process;actin-mediated cell contraction;actin-myosin filament sliding;cellular component movement;cellular process;multicellular organismal process;muscle contraction;muscle filament sliding;muscle system process;system process		actin filament bundle;actomyosin;cell part;contractile fiber part;cytoplasmic part;cytoskeletal part;cytoskeleton;cytosol;extracellular membrane-bounded organelle;extracellular organelle;extracellular region part;extracellular vesicular exosome;intracellular non-membrane-bounded organelle;intracellular organelle;intracellular organelle part;intracellular part;membrane-bounded organelle;membrane-b…	Cardiac muscle contraction;Dilated cardiomyopathy;Hypertrophic cardiomyopathy (HCM);Pathways in cancer;Thyroid cancer	-0.286917	26.9533	-0.659443	0.529168	0.718266	-6.60569	-1.44333	26.3751	-3.71928	0.0054058	0.0271679	-2.37758	-1.15641	26.2316	-2.20562	0.060639	0.243279	-4.64349	NPC.iPS	Neu.iPS	Neu.NPC
J3QKW7;A8MZF9;P55039	Developmentally-regulated GTP-binding protein 2	DRG2	19.9847	20.5095	19.483		19.5781					1	5.3	biological regulation;cellular process;cellular response to stimulus;regulation of biological process;regulation of cellular process;response to stimulus;signal transduction	binding;GTP binding;guanyl nucleotide binding;guanyl ribonucleotide binding;nucleotide binding;purine nucleotide binding;purine ribonucleoside triphosphate binding;purine ribonucleotide binding;ribonucleotide binding	cell part;cytoplasm;cytoplasmic part;intracellular membrane-bounded organelle;intracellular organelle;intracellular part;membrane;membrane-bounded organelle;mitochondrion;organelle		-0.41431	19.8888	-0.739457	0.489629	0.691942	-6.20075													NPC.iPS	Neu.iPS	Neu.NPC
Q15366-6;Q15366;H3BRU6;Q15366-7;B4DXP5;F8W0G4;F8VXH9	Poly(rC)-binding protein 2	PCBP2	21.351	21.3779		21.849	21.4115	21.25	21.1224		20.7632	1	8	biological regulation;catabolic process;cellular catabolic process;cellular macromolecule catabolic process;cellular macromolecule metabolic process;cellular metabolic process;cellular nitrogen compound metabolic process;cellular process;defense response;defense response to virus;gene expression;immune effector process;immune response;immune system process;innate immune response;macromolecule cat…	binding;DNA binding;enzyme binding;nucleic acid binding;protein binding;RNA binding;ubiquitin protein ligase binding	adherens junction;anchoring junction;cell junction;cell part;cell-substrate adherens junction;cell-substrate junction;cytoplasm;cytoplasmic part;cytosol;extracellular membrane-bounded organelle;extracellular organelle;extracellular region part;extracellular vesicular exosome;focal adhesion;intracellular membrane-bounded organelle;intracellular organelle;intracellular organelle part;intracellular …		0.139043	21.4479	0.395075	0.705307	0.841864	-6.64449	-0.42162	21.1536	-1.00745	0.35035	0.501997	-6.13373	-0.560663	21.2792	-1.41488	0.203119	0.47174	-5.63355	NPC.iPS	Neu.iPS	Neu.NPC
Q15366-3;Q15366-2;F8VZX2;Q15366-4;Q15366-5	Poly(rC)-binding protein 2	PCBP2	26.7823	26.8168	26.9162	26.651	25.954	26.6756	26.6544	26.9691	26.6067	9	43.9	biological regulation;catabolic process;cellular catabolic process;cellular macromolecule catabolic process;cellular macromolecule metabolic process;cellular metabolic process;cellular nitrogen compound metabolic process;cellular process;defense response;defense response to virus;gene expression;immune effector process;immune response;immune system process;innate immune response;macromolecule cat…	binding;DNA binding;enzyme binding;nucleic acid binding;protein binding;RNA binding;ubiquitin protein ligase binding	adherens junction;anchoring junction;cell junction;cell part;cell-substrate adherens junction;cell-substrate junction;cytoplasm;cytoplasmic part;cytosol;extracellular membrane-bounded organelle;extracellular organelle;extracellular region part;extracellular vesicular exosome;focal adhesion;intracellular membrane-bounded organelle;intracellular organelle;intracellular organelle part;intracellular …		-0.41153	26.6327	-1.30487	0.230225	0.465791	-5.9837	-0.0950267	26.7909	-0.315546	0.760057	0.846632	-6.81448	0.316503	26.5851	0.903221	0.394461	0.662594	-6.29779	NPC.iPS	Neu.iPS	Neu.NPC
Q15370;Q15370-2;B8ZZU8	Transcription elongation factor B polypeptide 2	TCEB2	21.9614	21.5419	21.8858	21.7613	21.9723	22.2637	22.8377	22.1809	21.6263	3	38.1	biological regulation;biosynthetic process;cellular biosynthetic process;cellular component assembly;cellular component organization;cellular component organization or biogenesis;cellular macromolecule biosynthetic process;cellular macromolecule metabolic process;cellular metabolic process;cellular nitrogen compound metabolic process;cellular process;cellular protein metabolic process;cellular re…	binding;enzyme binding;nucleic acid binding;protein binding;RNA binding;translation elongation factor activity;translation factor activity, nucleic acid binding;ubiquitin protein ligase binding	cell part;Cul2-RING ubiquitin ligase complex;Cul5-RING ubiquitin ligase complex;cullin-RING ubiquitin ligase complex;cytoplasmic part;cytoplasmic ubiquitin ligase complex;cytosol;elongin complex;extracellular membrane-bounded organelle;extracellular organelle;extracellular region part;extracellular vesicular exosome;intracellular organelle part;intracellular part;macromolecular complex;membrane-b…	Pathways in cancer;Renal cell carcinoma;Ubiquitin mediated proteolysis	0.202747	21.8978	0.679386	0.517135	0.711363	-6.59159	0.418583	22.0057	1.08018	0.310143	0.463634	-6.26484	0.215837	22.107	0.535093	0.608062	0.804549	-6.57319	NPC.iPS	Neu.iPS	Neu.NPC
Q15382;C9J931	GTP-binding protein Rheb	RHEB	21.2464	21.4017	20.8973	21.116		21.7582	22.7708	21.7977	20.8038	3	16.8	biological regulation;biosynthetic process;cell cycle arrest;cell cycle process;cell surface receptor linked signaling pathway;cellular biosynthetic process;cellular macromolecule metabolic process;cellular metabolic process;cellular nitrogen compound metabolic process;cellular process;cellular response to chemical stimulus;cellular response to endogenous stimulus;cellular response to hormone sti…	binding;catalytic activity;cation binding;GDP binding;GTP binding;GTPase activity;guanyl nucleotide binding;guanyl ribonucleotide binding;hydrolase activity;hydrolase activity, acting on acid anhydrides;hydrolase activity, acting on acid anhydrides, in phosphorus-containing anhydrides;ion binding;metal ion binding;nucleoside-triphosphatase activity;nucleotide binding;purine nucleotide binding;pur…	cell body;cell part;cell projection;cytoplasmic part;cytosol;dendrite;endoplasmic reticulum membrane;endoplasmic reticulum part;extracellular membrane-bounded organelle;extracellular organelle;extracellular region part;extracellular vesicular exosome;Golgi apparatus part;Golgi membrane;intracellular organelle part;intracellular part;macromolecular complex;membrane;membrane part;membrane-bounded o…	Insulin signaling pathway;mTOR signaling pathway	0.255312	21.2839	0.676232	0.521992	0.715374	-6.48108	0.608967	21.4863	1.22246	0.254773	0.404569	-6.10852	0.353655	21.6493	0.560385	0.59397	0.796129	-6.44655	NPC.iPS	Neu.iPS	Neu.NPC
Q15388	Mitochondrial import receptor subunit TOM20 homolog	TOMM20	23.1813	23.2787	22.7752	23.4463	22.9718		22.7435	22.9969	22.9204	2	22.8	cellular macromolecule metabolic process;cellular metabolic process;cellular process;cellular protein metabolic process;establishment of localization;establishment of localization in cell;establishment of protein localization;establishment of protein localization in mitochondrion;establishment of protein localization to organelle;intracellular protein transport;intracellular transport;macromolecu…	active transmembrane transporter activity;binding;macromolecule transmembrane transporter activity;P-P-bond-hydrolysis-driven protein transmembrane transporter activity;P-P-bond-hydrolysis-driven transmembrane transporter activity;primary active transmembrane transporter activity;protein binding;protein transmembrane transporter activity;protein transporter activity;substrate-specific transmembra…	cell part;cytoplasmic part;endoplasmic reticulum part;ER-mitochondrion membrane contact site;integral to membrane;intracellular membrane-bounded organelle;intracellular organelle;intracellular organelle part;intracellular part;intrinsic to membrane;macromolecular complex;membrane part;membrane-bounded organelle;mitochondrial membrane part;mitochondrial outer membrane translocase complex;mitochond…		0.130658	23.1307	0.35986	0.730247	0.854737	-6.65927	-0.19147	22.9827	-0.612313	0.556564	0.692974	-6.66624	-0.322128	23.0158	-0.852127	0.424385	0.691766	-6.23051	NPC.iPS	Neu.iPS	Neu.NPC
Q15392-2;Q15392;Q3LIE7	Delta(24)-sterol reductase	DHCR24;Nbla03646	24.1269	24.1528	24.4459	22.6665		24.288	24.0784	24.181	22.0274	10	33.5	alcohol metabolic process;amyloid precursor protein catabolic process;amyloid precursor protein metabolic process;anatomical structure development;apoptosis;biological regulation;biosynthetic process;catabolic process;cell cycle arrest;cell cycle process;cell death;cellular component organization;cellular component organization or biogenesis;cellular macromolecule metabolic process;cellular metab…	antigen binding;binding;catalytic activity;coenzyme binding;cofactor binding;delta24(24-1) sterol reductase activity;delta24-sterol reductase activity;enzyme binding;flavin adenine dinucleotide binding;oxidoreductase activity;oxidoreductase activity, acting on CH-OH group of donors;oxidoreductase activity, acting on the CH-CH group of donors;oxidoreductase activity, acting on the CH-CH group of d…	cell part;cytoplasmic part;cytoskeleton;cytosol;endoplasmic reticulum;endoplasmic reticulum membrane;endoplasmic reticulum part;Golgi apparatus part;Golgi membrane;integral to membrane;intracellular membrane-bounded organelle;intracellular non-membrane-bounded organelle;intracellular organelle;intracellular organelle part;intracellular part;intrinsic to membrane;membrane;membrane part;membrane-bo…	Steroid biosynthesis	-0.76461	23.936	-1.46001	0.19042	0.423456	-5.6856	-0.81295	23.8354	-1.42956	0.189017	0.324478	-5.85789	-0.04834	23.4483	-0.0590381	0.954693	0.979705	-6.61833	NPC.iPS	Neu.iPS	Neu.NPC
Q15393;Q15393-3	Splicing factor 3B subunit 3	SF3B3	26.0131	26.0402	26.1376	25.7852	26.3708	26.6693	25.5758	25.9466	24.8349	20	26.5	biological regulation;cellular component assembly;cellular component organization;cellular component organization or biogenesis;cellular macromolecule metabolic process;cellular metabolic process;cellular nitrogen compound metabolic process;cellular process;gene expression;macromolecular complex assembly;macromolecular complex subunit organization;macromolecule metabolic process;metabolic process…	binding;nucleic acid binding;RNA binding	catalytic step 2 spliceosome;cell part;intracellular organelle part;intracellular part;macromolecular complex;nuclear part;nucleoplasm;organelle part;ribonucleoprotein complex;small nuclear ribonucleoprotein complex;spliceosomal complex;U12-type spliceosomal complex	Spliceosome	0.211447	26.1694	0.651182	0.534203	0.720519	-6.61142	-0.611203	25.758	-1.66121	0.133503	0.256619	-5.55052	-0.82265	25.8638	-1.94491	0.0900531	0.309734	-5.02431	NPC.iPS	Neu.iPS	Neu.NPC
Q15397	Pumilio domain-containing protein KIAA0020	KIAA0020	20.6746	20.6974	20.6032			20.6333		20.3359		1	3.9	biological regulation;posttranscriptional regulation of gene expression;regulation of biological process;regulation of biosynthetic process;regulation of cellular biosynthetic process;regulation of cellular macromolecule biosynthetic process;regulation of cellular metabolic process;regulation of cellular process;regulation of cellular protein metabolic process;regulation of gene expression;regula…	binding;DNA binding;mRNA binding;nucleic acid binding;RNA binding	cell part;cytoplasmic part;endoplasmic reticulum;intracellular membrane-bounded organelle;intracellular non-membrane-bounded organelle;intracellular organelle;intracellular organelle part;intracellular part;membrane-bounded organelle;non-membrane-bounded organelle;nuclear part;nucleolus;organelle;organelle part		-0.0250567	20.6521	-0.05766	0.956033	0.981672	-6.49936	-0.322467	20.5778	-0.685965	0.516851	0.659266	-6.27111	-0.29741	20.4846	-0.400006	0.712288	0.858354	-6.09828	NPC.iPS	Neu.iPS	Neu.NPC
Q15398-1;Q15398-3;Q15398	Disks large-associated protein 5	DLGAP5		20.0397	19.9086		20.1709	20.1017				2	3.3	biological regulation;cell cycle process;cell proliferation;cellular component movement;cellular metabolic process;cellular process;chromosome movement towards spindle pole;dephosphorylation;establishment of chromosome localization;establishment of localization;establishment of localization in cell;establishment of organelle localization;metabolic process;microtubule-based movement;microtubule-ba…	catalytic activity;hydrolase activity;hydrolase activity, acting on ester bonds;phosphatase activity;phosphoprotein phosphatase activity;phosphoric ester hydrolase activity	cell part;centrosome;cytoplasm;cytoplasmic part;cytoskeletal part;intracellular membrane-bounded organelle;intracellular non-membrane-bounded organelle;intracellular organelle;intracellular organelle part;intracellular part;membrane-bounded organelle;microtubule organizing center;non-membrane-bounded organelle;nucleus;organelle;organelle part;spindle pole centrosome		0.162175	20.0552	0.429256	0.683853	0.828433	-6.53723													NPC.iPS	Neu.iPS	Neu.NPC
P06753-5									20.3115		21.3086	2	9.7	#N/A	#N/A	#N/A	#N/A																			NPC.iPS	Neu.iPS	Neu.NPC
Q15404-2;Q15404	Ras suppressor protein 1	RSU1	23.8196	23.4699	24.0154	22.8194	23.3162	22.9507			20.854	10	50	biological regulation;cell junction assembly;cell junction organization;cellular component assembly;cellular component assembly at cellular level;cellular component organization;cellular component organization at cellular level;cellular component organization or biogenesis;cellular component organization or biogenesis at cellular level;cellular process;cellular response to stimulus;intracellular …		adherens junction;anchoring junction;cell junction;cell part;cell-substrate adherens junction;cell-substrate junction;cytoplasmic part;cytosol;extracellular membrane-bounded organelle;extracellular organelle;extracellular region part;extracellular vesicular exosome;focal adhesion;intracellular part;membrane-bounded organelle;membrane-bounded vesicle;organelle;vesicle		-0.739527	23.3985	-2.40985	0.0442241	0.186726	-4.43929	-2.91428	23.0397	-5.80694	0.000917136	0.00876345	-0.129354	-2.17476	22.4851	-4.21023	0.00679441	0.0744225	-1.98318	NPC.iPS	Neu.iPS	Neu.NPC
A9UF01;P11274-2;P11274	Breakpoint cluster region protein	BCR/ABL fusion;BCR		18.7191	18.7282		18.3761		19.6754		20.2213	2	4.9	actin cytoskeleton organization;actin filament-based process;anatomical structure development;anatomical structure morphogenesis;biological regulation;brain development;cell surface receptor linked signaling pathway;cellular component organization;cellular component organization at cellular level;cellular component organization or biogenesis;cellular component organization or biogenesis at cellul…	adenyl nucleotide binding;adenyl ribonucleotide binding;ATP binding;binding;catalytic activity;enzyme activator activity;enzyme regulator activity;GTPase activator activity;GTPase regulator activity;guanyl-nucleotide exchange factor activity;kinase activity;nucleoside-triphosphatase regulator activity;nucleotide binding;phosphotransferase activity, alcohol group as acceptor;protein kinase activit…	cell junction;cell part;cytoplasmic part;cytoskeletal part;cytosol;extracellular membrane-bounded organelle;extracellular organelle;extracellular region part;extracellular vesicular exosome;intracellular organelle part;intracellular part;macromolecular complex;membrane;membrane-bounded organelle;membrane-bounded vesicle;organelle;organelle part;postsynaptic density;postsynaptic membrane;protein c…	Chronic myeloid leukemia;Pathways in cancer	-0.3475	18.6078	-0.684925	0.526598	0.717258	-6.17866	1.22467	19.336	2.82209	0.0283032	0.0881002	-3.75108	1.57218	19.4243	2.57691	0.0547615	0.230292	-3.96233	NPC.iPS	Neu.iPS	Neu.NPC
Q15417;Q15417-3	Calponin-3	CNN3	25.946	26.0559	25.4502	27.7058	27.9689	27.2027	24.01	24.2723	25.659	15	44.4	actin cytoskeleton organization;actin filament-based process;actomyosin structure organization;cell differentiation;cellular component organization;cellular component organization at cellular level;cellular component organization or biogenesis;cellular component organization or biogenesis at cellular level;cellular developmental process;cellular process;cytoskeleton organization;developmental pro…		actin cytoskeleton;adherens junction;anchoring junction;cell junction;cell part;cell-substrate adherens junction;cell-substrate junction;cytoplasm;cytoskeleton;focal adhesion;intracellular non-membrane-bounded organelle;intracellular organelle;intracellular part;non-membrane-bounded organelle;organelle		1.80842	26.7216	5.3537	0.000821623	0.0210318	-0.312113	-1.17027	25.2322	-2.46648	0.037609	0.105711	-4.3452	-2.97869	26.1364	-5.92856	0.000446793	0.0202828	0.390411	NPC.iPS	Neu.iPS	Neu.NPC
Q15424-2;Q15424;Q15424-4;Q15424-3;K7ES42	Scaffold attachment factor B1	SAFB	24.0072	23.8324	22.9809	24.1682	24.7183	23.6213	23.7369	23.3243	24.1271	6	9.6	biological regulation;biosynthetic process;cellular biosynthetic process;cellular component organization;cellular component organization at cellular level;cellular component organization or biogenesis;cellular component organization or biogenesis at cellular level;cellular macromolecule biosynthetic process;cellular macromolecule metabolic process;cellular metabolic process;cellular nitrogen comp…	binding;chromatin binding;core promoter binding;DNA binding;double-stranded DNA binding;nucleic acid binding;nucleotide binding;regulatory region DNA binding;regulatory region nucleic acid binding;structure-specific DNA binding;transcription regulatory region DNA binding	cell part;intracellular membrane-bounded organelle;intracellular organelle;intracellular organelle part;intracellular part;membrane-bounded organelle;nuclear part;nucleoplasm;nucleus;organelle;organelle part		0.562457	23.888	1.3438	0.217919	0.453756	-5.93696	0.1226	23.6681	0.309107	0.764781	0.849475	-6.81668	-0.439857	23.9493	-1.07269	0.316671	0.588652	-6.13265	NPC.iPS	Neu.iPS	Neu.NPC
Q15427	Splicing factor 3B subunit 4	SF3B4	22.8074	23.4735	23.53	23.0642	23.6056	22.5624	22.4892	22.2026	22.5465	3	10.8	biological regulation;cellular macromolecule metabolic process;cellular metabolic process;cellular nitrogen compound metabolic process;cellular process;gene expression;macromolecule metabolic process;metabolic process;mRNA metabolic process;mRNA processing;nitrogen compound metabolic process;nuclear mRNA splicing, via spliceosome;nucleic acid metabolic process;nucleobase-containing compound metab…	binding;nucleic acid binding;nucleotide binding	cell part;intracellular organelle part;intracellular part;macromolecular complex;nuclear part;nucleoplasm;organelle part;ribonucleoprotein complex;spliceosomal complex;U12-type spliceosomal complex	Spliceosome	-0.192947	23.1738	-0.50589	0.62734	0.789161	-6.70143	-0.857557	22.8415	-2.53067	0.033957	0.098903	-4.24419	-0.66461	22.7451	-1.77329	0.116567	0.354882	-5.26679	NPC.iPS	Neu.iPS	Neu.NPC
Q15437;Q5QPE1;Q5QPE2	Protein transport protein Sec23B	SEC23B	20.2034	20.4313				20.5882	20.4698		19.9451	4	8.6	cellular process;ER to Golgi vesicle-mediated transport;establishment of localization;establishment of localization in cell;establishment of protein localization;Golgi vesicle transport;intracellular protein transport;intracellular transport;protein transport;transport;vesicle-mediated transport	binding;cation binding;ion binding;metal ion binding;transition metal ion binding;zinc ion binding	cell part;COPII vesicle coat;cytoplasmic part;cytoplasmic vesicle part;endomembrane system;endoplasmic reticulum membrane;endoplasmic reticulum part;endoplasmic reticulum-Golgi intermediate compartment membrane;Golgi apparatus part;Golgi membrane;intracellular membrane-bounded organelle;intracellular organelle;intracellular organelle part;intracellular part;macromolecular complex;membrane;membran…	Protein processing in endoplasmic reticulum	0.27085	20.4076	0.52522	0.623919	0.787541	-6.28467	-0.10991	20.2624	-0.251747	0.809143	0.881993	-6.6333	-0.38076	20.3344	-0.627278	0.560858	0.77927	-6.11029	NPC.iPS	Neu.iPS	Neu.NPC
Q15459;Q15459-2	Splicing factor 3A subunit 1	SF3A1	25.6667	25.887	24.9036	25.6161	26.1987	25.5366	24.762	23.911	24.8409	17	26	biological regulation;cellular component assembly;cellular component assembly at cellular level;cellular component organization;cellular component organization at cellular level;cellular component organization or biogenesis;cellular component organization or biogenesis at cellular level;cellular macromolecular complex assembly;cellular macromolecular complex subunit organization;cellular macromol…	binding;nucleic acid binding;RNA binding	catalytic step 2 spliceosome;cell part;intracellular organelle part;intracellular part;macromolecular complex;nuclear part;nucleoplasm;organelle part;prespliceosome;ribonucleoprotein complex;small nuclear ribonucleoprotein complex;spliceosomal complex;U2 snRNP;U2-type prespliceosome;U2-type spliceosomal complex	Spliceosome	0.298013	25.6348	0.799326	0.448467	0.661741	-6.49911	-0.981143	24.9952	-2.39121	0.0423981	0.114773	-4.46317	-1.27916	25.1442	-3.23332	0.013069	0.106497	-3.10129	NPC.iPS	Neu.iPS	Neu.NPC
Q15477;H7C4L3	Helicase SKI2W	SKIV2L	20.0317	19.9935	20.347	19.9333			20.1526	20.2757		2	2.5	metabolic process	adenyl nucleotide binding;adenyl ribonucleotide binding;ATP binding;ATPase activity;ATPase activity, coupled;ATP-dependent helicase activity;ATP-dependent RNA helicase activity;binding;catalytic activity;helicase activity;hydrolase activity;hydrolase activity, acting on acid anhydrides;hydrolase activity, acting on acid anhydrides, in phosphorus-containing anhydrides;nucleic acid binding;nucleosi…	cell part;cytoplasmic part;intracellular membrane-bounded organelle;intracellular organelle;intracellular organelle part;intracellular part;macromolecular complex;membrane-bounded organelle;nuclear part;nucleoplasm;nucleus;organelle;organelle part;protein complex;Ski complex	RNA degradation	-0.190797	20.0764	-0.420666	0.689755	0.831947	-6.40083	0.0900783	20.1601	0.251561	0.808236	0.881993	-6.72373	0.280875	20.1206	0.49256	0.64536	0.828132	-6.19354	NPC.iPS	Neu.iPS	Neu.NPC
Q15555-5;Q15555-3;Q15555;K7ERD8;Q15555-2;Q15555-4;M0QX52;K7EL66	Microtubule-associated protein RP/EB family member 2	MAPRE2	21.0057	20.4553	21.8622	21.5204	21.1178	20.4061	23.8771	22.5752	23.4105	6	24.3	biological regulation;cell cycle phase;cell cycle process;cell division;cell proliferation;cellular component organization;cellular component organization at cellular level;cellular component organization or biogenesis;cellular component organization or biogenesis at cellular level;cellular process;cellular response to stimulus;mitosis;nuclear division;organelle fission;organelle organization;reg…		cell part;cytoplasm;cytoskeletal part;cytoskeleton;intracellular non-membrane-bounded organelle;intracellular organelle;intracellular organelle part;intracellular part;microtubule cytoskeleton;microtubule plus end;non-membrane-bounded organelle;organelle;organelle part		-0.0929533	21.0613	-0.201066	0.845947	0.92189	-6.81973	2.17989	22.1977	4.51772	0.00173537	0.0133122	-1.19884	2.27285	22.1512	4.84698	0.00152844	0.0365172	-0.879713	NPC.iPS	Neu.iPS	Neu.NPC
Q15637-4;Q15637-6;Q15637-7;Q15637-3;Q15637-2;Q15637;Q15637-5	Splicing factor 1	SF1	25.149	25.0171	24.4322	25.1167	25.6926	24.5645	23.7254	23.0676	24.7504	10	23.5	biological regulation;biosynthetic process;cell differentiation;cellular biosynthetic process;cellular component assembly;cellular component assembly at cellular level;cellular component organization;cellular component organization at cellular level;cellular component organization or biogenesis;cellular component organization or biogenesis at cellular level;cellular developmental process;cellular…	binding;cation binding;ion binding;metal ion binding;nucleic acid binding;protein binding transcription factor activity;RNA binding;transcription cofactor activity;transcription corepressor activity;transcription factor binding transcription factor activity;transition metal ion binding;zinc ion binding	cell part;cytoplasmic part;intracellular membrane-bounded organelle;intracellular non-membrane-bounded organelle;intracellular organelle;intracellular organelle part;intracellular part;macromolecular complex;membrane-bounded organelle;non-membrane-bounded organelle;nuclear part;nucleoplasm;nucleus;organelle;organelle part;ribonucleoprotein complex;ribosome;spliceosomal complex		0.25852	24.9954	0.665814	0.525306	0.716977	-6.60122	-1.01833	24.3569	-2.16498	0.0607585	0.144919	-4.81326	-1.27685	24.4862	-2.4558	0.0414706	0.202467	-4.26945	NPC.iPS	Neu.iPS	Neu.NPC
O95425-2;O95425-4;O95425-3;O95425	Supervillin	SVIL	18.8905		19.6333			20.1442	19.9444	19.4442		4	3	anatomical structure development;biological regulation;cellular component organization;cellular component organization at cellular level;cellular component organization or biogenesis;cellular component organization or biogenesis at cellular level;cellular process;cytoskeleton organization;developmental process;muscle tissue development;organelle organization;positive regulation of biological proc…	actin binding;actin filament binding;binding;cytoskeletal protein binding;protein binding	actin cytoskeleton;adherens junction;anchoring junction;cell division site part;cell junction;cell part;cell projection;cell-substrate adherens junction;cell-substrate junction;cleavage furrow;contractile fiber part;costamere;cytoplasm;cytoplasmic part;cytoskeletal part;cytoskeleton;focal adhesion;intracellular membrane-bounded organelle;intracellular non-membrane-bounded organelle;intracellular …		0.882305	19.556	1.49562	0.200408	0.434686	-5.36776	0.432375	19.4781	0.906005	0.397823	0.546657	-6.23011	-0.44993	19.8442	-0.745483	0.492982	0.734793	-6.02365	NPC.iPS	Neu.iPS	Neu.NPC
P06756-3;P06756-2;P06756	Integrin alpha-V;Integrin alpha-V heavy chain;Integrin alpha-V light chain	ITGAV	22.8864	20.8974	22.6812	22.8712	21.288	24.0474		21.9382	21.1129	8	10.1	anatomical structure formation involved in morphogenesis;anatomical structure morphogenesis;angiogenesis;antigen processing and presentation;antigen processing and presentation of exogenous antigen;antigen processing and presentation of exogenous peptide antigen;antigen processing and presentation of exogenous peptide antigen via MHC class I;antigen processing and presentation of exogenous peptid…	binding;calcium channel activity;cation binding;cation channel activity;cation transmembrane transporter activity;channel activity;cytokine binding;enzyme binding;extracellular matrix binding;fibronectin binding;gated channel activity;growth factor binding;ion binding;ion channel activity;ion transmembrane transporter activity;metal ion binding;passive transmembrane transporter activity;protease …	adherens junction;alphav-beta3 integrin complex;alphav-beta3 integrin-IGF-1-IGF1R complex;alphav-beta5 integrin complex;alphav-beta8 integrin complex;anchoring junction;cell junction;cell part;cell projection membrane;cell projection part;cell surface;cell-substrate adherens junction;cell-substrate junction;cytoplasmic membrane-bounded vesicle;cytoplasmic part;cytoplasmic vesicle;endocytic vesicl…	Arrhythmogenic right ventricular cardiomyopathy (ARVC);Cell adhesion molecules (CAMs);Dilated cardiomyopathy;ECM-receptor interaction;Focal adhesion;Hypertrophic cardiomyopathy (HCM);Pathways in cancer;Phagosome;Regulation of actin cytoskeleton;Small cell lung cancer	0.58055	22.4453	0.738579	0.482442	0.687938	-6.54757	-0.629502	21.9032	-0.963017	0.365998	0.516224	-6.27002	-1.21005	22.2515	-1.49088	0.182784	0.451211	-5.53958	NPC.iPS	Neu.iPS	Neu.NPC
Q15645;H0YAL2;Q15645-2	Pachytene checkpoint protein 2 homolog	TRIP13		21.0515	21.2575			21.0601				2	6.9	anatomical structure development;biosynthetic process;cell cycle phase;cell cycle process;cell development;cell maturation;cellular biosynthetic process;cellular component assembly;cellular component assembly at cellular level;cellular component organization;cellular component organization at cellular level;cellular component organization or biogenesis;cellular component organization or biogenesi…	adenyl nucleotide binding;adenyl ribonucleotide binding;ATP binding;binding;identical protein binding;nucleotide binding;protein binding;protein binding transcription factor activity;purine nucleotide binding;purine ribonucleoside triphosphate binding;purine ribonucleotide binding;ribonucleotide binding;transcription cofactor activity;transcription factor binding transcription factor activity	cell part;germ cell nucleus;intracellular membrane-bounded organelle;intracellular organelle;intracellular part;male germ cell nucleus;membrane-bounded organelle;nucleus;organelle		-0.094465	21.123	-0.183725	0.862107	0.933454	-6.42377													NPC.iPS	Neu.iPS	Neu.NPC
Q15654	Thyroid receptor-interacting protein 6	TRIP6	21.807	21.723	21.2949		20.9101	20.8402				3	10.3	biological regulation;biosynthetic process;cell junction assembly;cell junction organization;cell-substrate junction assembly;cellular biosynthetic process;cellular component assembly;cellular component assembly at cellular level;cellular component organization;cellular component organization at cellular level;cellular component organization or biogenesis;cellular component organization or biogen…	binding;cation binding;cytokine receptor binding;enzyme binding;growth factor receptor binding;hormone receptor binding;interleukin-1 receptor binding;ion binding;kinase binding;metal ion binding;nuclear hormone receptor binding;protein binding;receptor binding;thyroid hormone receptor binding;transcription factor binding;transition metal ion binding;zinc ion binding	adherens junction;anchoring junction;cell junction;cell part;cell-substrate adherens junction;cell-substrate junction;cytoplasm;cytoskeleton;focal adhesion;intracellular membrane-bounded organelle;intracellular non-membrane-bounded organelle;intracellular organelle;intracellular part;membrane;membrane-bounded organelle;non-membrane-bounded organelle;nucleus;organelle;plasma membrane	NOD-like receptor signaling pathway	-0.733148	21.315	-2.12626	0.0736579	0.247476	-4.78645													NPC.iPS	Neu.iPS	Neu.NPC
A9Z1X7;Q8IYB3-2;Q8IYB3	Serine/arginine repetitive matrix protein 1	SRRM1							20.9552	20.2956	21.2356	3	6.2	biosynthetic process;cellular biosynthetic process;cellular macromolecule biosynthetic process;cellular macromolecule metabolic process;cellular metabolic process;cellular nitrogen compound metabolic process;cellular process;establishment of localization;establishment of localization in cell;establishment of RNA localization;gene expression;intracellular transport;macromolecule biosynthetic proce…	binding;DNA binding;nucleic acid binding	catalytic step 2 spliceosome;cell part;cytoplasmic part;cytosol;intracellular membrane-bounded organelle;intracellular organelle;intracellular organelle part;intracellular part;macromolecular complex;membrane-bounded organelle;nuclear body;nuclear matrix;nuclear part;nuclear speck;nucleoplasm;nucleoplasm part;nucleus;organelle;organelle part;ribonucleoprotein complex;spliceosomal complex	mRNA surveillance pathway;RNA transport																			NPC.iPS	Neu.iPS	Neu.NPC
Q15691	Microtubule-associated protein RP/EB family member 1	MAPRE1	26.51	26.6844	25.8679	26.3594	27.2881	26.6763	26.6	26.1333	27.2492	16	68.3	biological regulation;cell cycle;cell cycle phase;cell cycle process;cell division;cell proliferation;cellular component organization;cellular component organization at cellular level;cellular component organization or biogenesis;cellular component organization or biogenesis at cellular level;cellular localization;cellular macromolecule localization;cellular process;cellular protein localization;…	binding;cytoskeletal protein binding;microtubule binding;microtubule plus-end binding;protein binding;protein C-terminus binding;tubulin binding	cell cortex part;cell part;cell projection membrane;cell projection part;centrosome;cortical cytoskeleton;cortical microtubule cytoskeleton;cytoplasm;cytoplasmic microtubule;cytoplasmic part;cytoskeletal part;cytoskeleton;cytosol;Golgi apparatus;intracellular membrane-bounded organelle;intracellular non-membrane-bounded organelle;intracellular organelle;intracellular organelle part;intracellular …		0.420453	26.5643	1.12011	0.29696	0.531077	-6.19307	0.30671	26.5075	0.759486	0.46837	0.614801	-6.56052	-0.113743	26.7177	-0.267024	0.796637	0.89999	-6.69049	NPC.iPS	Neu.iPS	Neu.NPC
Q15717;Q15717-2;M0QZR9	ELAV-like protein 1	ELAVL1	26.1774	26.2605	25.8178	26.6649	27.3583	26.5203	25.871	26.1038	26.4219	14	45.1	3'-UTR-mediated mRNA stabilization;biological regulation;cellular macromolecule metabolic process;cellular metabolic process;cellular nitrogen compound metabolic process;cellular process;developmental process;gene expression;macromolecule metabolic process;metabolic process;mRNA metabolic process;mRNA stabilization;multicellular organismal development;multicellular organismal process;nitrogen com…	AU-rich element binding;binding;double-stranded RNA binding;enzyme binding;kinase binding;mRNA 3'-UTR AU-rich region binding;mRNA 3'-UTR binding;mRNA binding;nucleic acid binding;nucleotide binding;protein binding;protein kinase binding;RNA binding	cell part;cytoplasm;cytoplasmic part;cytosol;intracellular membrane-bounded organelle;intracellular organelle;intracellular organelle part;intracellular part;membrane;membrane-bounded organelle;nuclear part;nucleoplasm;nucleus;organelle;organelle part		0.762603	26.4665	2.257	0.0558245	0.212385	-4.66958	0.047	26.1087	0.145236	0.887955	0.927648	-6.85762	-0.715603	26.49	-1.94529	0.0900015	0.309734	-5.02377	NPC.iPS	Neu.iPS	Neu.NPC
Q15738;C9JDR0	Sterol-4-alpha-carboxylate 3-dehydrogenase, decarboxylating	NSDHL	22.7244	22.7648	23.2538	23.3973	21.8511	23.9796	23.9482	23.8593	22.2794	6	26	alcohol metabolic process;anatomical structure development;biological regulation;biosynthetic process;blood vessel development;cell surface receptor linked signaling pathway;cellular process;cellular response to stimulus;cholesterol biosynthetic process;cholesterol metabolic process;developmental process;embryonic organ development;epidermis development;hair cycle process;hair follicle developmen…	3-beta-hydroxy-delta5-steroid dehydrogenase activity;catalytic activity;oxidoreductase activity;oxidoreductase activity, acting on CH-OH group of donors;oxidoreductase activity, acting on the CH-OH group of donors, NAD or NADP as acceptor;steroid dehydrogenase activity;steroid dehydrogenase activity, acting on the CH-OH group of donors, NAD or NADP as acceptor;sterol-4-alpha-carboxylate 3-dehydro…	cell part;cytoplasmic part;endoplasmic reticulum;endoplasmic reticulum membrane;endoplasmic reticulum part;integral to membrane;intracellular membrane-bounded organelle;intracellular organelle;intracellular organelle part;intracellular part;intrinsic to membrane;lipid particle;membrane;membrane part;membrane-bounded organelle;organelle;organelle membrane;organelle part	Steroid biosynthesis	0.1617	22.9952	0.296413	0.774888	0.87501	-6.7934	0.447973	23.1383	0.918812	0.383857	0.533084	-6.42414	0.286273	23.2192	0.423231	0.683987	0.847337	-6.63125	NPC.iPS	Neu.iPS	Neu.NPC
Q15746-4;Q15746-5;Q15746-2;Q15746-3;Q15746-6;Q15746;Q15746-9;Q15746-11;Q15746-7	Myosin light chain kinase, smooth muscle;Myosin light chain kinase, smooth muscle, deglutamylated form	MYLK	21.7486	21.6043						22.3299		3	2.1	actin cytoskeleton organization;actin filament organization;actin filament-based process;anatomical structure morphogenesis;aorta smooth muscle tissue morphogenesis;biological regulation;bleb assembly;cell projection assembly;cell projection organization;cellular component assembly;cellular component assembly at cellular level;cellular component organization;cellular component organization at cel…	adenyl nucleotide binding;adenyl ribonucleotide binding;ATP binding;binding;calmodulin-dependent protein kinase activity;catalytic activity;cation binding;ion binding;kinase activity;metal ion binding;myosin light chain kinase activity;nucleotide binding;phosphotransferase activity, alcohol group as acceptor;protein kinase activity;protein serine/threonine kinase activity;purine nucleotide bindin…	actin filament bundle;actomyosin;cell division site part;cell junction;cell part;cell projection;cell-cell junction;cleavage furrow;cytoplasm;cytoplasmic part;cytoskeletal part;cytosol;extracellular membrane-bounded organelle;extracellular organelle;extracellular region part;extracellular vesicular exosome;intracellular organelle part;intracellular part;lamellipodium;membrane-bounded organelle;me…	Calcium signaling pathway;Focal adhesion;Gastric acid secretion;Regulation of actin cytoskeleton;Vascular smooth muscle contraction							0.653495	21.8943	1.20051	0.280057	0.431578	-5.73331							NPC.iPS	Neu.iPS	Neu.NPC
Q15777-2;Q15777;F2Z346;E9PQW8;O15442;O15442-2	Metallophosphoesterase MPPED2;Metallophosphoesterase domain-containing protein 1	MPPED2;MPPED1								21.007	21.6927	2	13.4	anatomical structure development;developmental process;nervous system development;system development	binding;catalytic activity;cation binding;hydrolase activity;ion binding;metal ion binding																					NPC.iPS	Neu.iPS	Neu.NPC
Q15785	Mitochondrial import receptor subunit TOM34	TOMM34	22.1876	21.7966			22.8102			21.6158	21.4691	4	19.1	establishment of localization;establishment of localization in cell;establishment of protein localization;establishment of protein localization in mitochondrion;establishment of protein localization to organelle;intracellular protein transport;intracellular transport;mitochondrial transport;protein import;protein targeting;protein targeting to mitochondrion;protein transport;transport	binding;heat shock protein binding;protein binding	cell part;cytoplasm;cytoplasmic part;integral to membrane;intracellular membrane-bounded organelle;intracellular organelle;intracellular organelle part;intracellular part;intrinsic to membrane;membrane;membrane part;membrane-bounded organelle;mitochondrial membrane;mitochondrial outer membrane;mitochondrial part;nuclear part;nucleoplasm;nucleus;organelle;organelle membrane;organelle outer membran…		0.818175	22.2648	1.53933	0.189804	0.423256	-5.31599	-0.449585	21.7673	-1.06372	0.32601	0.478814	-6.07709	-1.26776	21.9651	-2.2196	0.0830399	0.29742	-4.3909	NPC.iPS	Neu.iPS	Neu.NPC
Q15800-2;Q15800;D6RDP9;D6R952	Methylsterol monooxygenase 1	MSMO1	21.2401	20.8582	21.0728	21.0588		21.7498		21.9907	20.6013	2	13	alcohol metabolic process;biosynthetic process;carboxylic acid biosynthetic process;carboxylic acid metabolic process;cellular biosynthetic process;cellular ketone metabolic process;cellular lipid metabolic process;cellular metabolic process;cellular process;cholesterol biosynthetic process;cholesterol metabolic process;fatty acid biosynthetic process;fatty acid metabolic process;lipid biosynthet…	binding;C-4 methylsterol oxidase activity;catalytic activity;cation binding;ion binding;iron ion binding;metal ion binding;monooxygenase activity;oxidoreductase activity;oxidoreductase activity, acting on paired donors, with incorporation or reduction of molecular oxygen;oxidoreductase activity, acting on paired donors, with incorporation or reduction of molecular oxygen, NADH or NADPH as one don…	cell part;cytoplasmic part;endoplasmic reticulum;endoplasmic reticulum membrane;endoplasmic reticulum part;integral to membrane;intracellular membrane-bounded organelle;intracellular organelle;intracellular organelle part;intracellular part;intrinsic to membrane;membrane;membrane part;membrane-bounded organelle;organelle;organelle membrane;organelle part;plasma membrane	Steroid biosynthesis	0.34726	21.1959	0.931289	0.38467	0.614585	-6.26973	0.23897	21.1526	0.491886	0.637081	0.755548	-6.62569	-0.10829	21.3501	-0.17239	0.869288	0.939933	-6.51374	NPC.iPS	Neu.iPS	Neu.NPC
Q16778;P33778;P23527;P06899	Histone H2B type 2-E;Histone H2B type 1-B;Histone H2B type 1-O;Histone H2B type 1-J	HIST2H2BE;HIST1H2BB;HIST1H2BO;HIST1H2BJ	31.5547	31.5284	29.7931	31.467	32.4806	31.8023	31.4601	31.4795	32.0671	13	70.6	antibacterial humoral response;antimicrobial humoral response;cellular component assembly;cellular component assembly at cellular level;cellular component organization;cellular component organization at cellular level;cellular component organization or biogenesis;cellular component organization or biogenesis at cellular level;cellular macromolecular complex assembly;cellular macromolecular comple…	binding;DNA binding;nucleic acid binding	cell part;chromosomal part;extracellular membrane-bounded organelle;extracellular organelle;extracellular region part;extracellular space;extracellular vesicular exosome;intracellular membrane-bounded organelle;intracellular organelle;intracellular organelle part;intracellular part;macromolecular complex;membrane-bounded organelle;membrane-bounded vesicle;nuclear chromosome part;nuclear nucleosom…	Systemic lupus erythematosus	0.95794	31.4377	1.76176	0.118292	0.323176	-5.38959	0.710197	31.3138	1.38034	0.203154	0.341538	-5.91971	-0.247743	31.7928	-0.6301	0.54732	0.770896	-6.51407	NPC.iPS	Neu.iPS	Neu.NPC
Q15813;Q15813-2	Tubulin-specific chaperone E	TBCE	22.7613	22.5087	23.9486	21.0573	20.6969	22.602	22.1513	22.0729	20.8125	5	19	adult behavior;adult locomotory behavior;anatomical structure morphogenesis;axonogenesis;behavior;cell part morphogenesis;cell projection morphogenesis;cell projection organization;cellular component morphogenesis;cellular component organization;cellular component organization at cellular level;cellular component organization or biogenesis;cellular component organization or biogenesis at cellular…	binding;chaperone binding;protein binding	cell part;cytoplasm;cytoskeletal part;intracellular organelle part;intracellular part;macromolecular complex;microtubule;organelle part;protein complex		-1.62079	22.2625	-2.72513	0.0274346	0.146227	-3.96001	-1.39393	22.3759	-2.69522	0.0261479	0.0827227	-3.984	0.226853	21.5655	0.373837	0.71886	0.86161	-6.65278	NPC.iPS	Neu.iPS	Neu.NPC
Q15814	Tubulin-specific chaperone C	TBCC						20.7935	20.4961	20.6166	20.8843	4	13	anatomical structure morphogenesis;cell morphogenesis;cellular component morphogenesis;cellular component organization;cellular component organization or biogenesis;cellular developmental process;cellular macromolecule metabolic process;cellular metabolic process;cellular process;cellular protein metabolic process;'de novo' posttranslational protein folding;'de novo' protein folding;developmental…	binding;catalytic activity;chaperone binding;GTPase activity;hydrolase activity;hydrolase activity, acting on acid anhydrides;hydrolase activity, acting on acid anhydrides, in phosphorus-containing anhydrides;nucleoside-triphosphatase activity;protein binding;pyrophosphatase activity	cell part;cell projection;cilium;cytoplasm;cytoskeletal part;cytoskeleton;intracellular non-membrane-bounded organelle;intracellular organelle;intracellular organelle part;intracellular part;macromolecular complex;microtubule;non-membrane-bounded organelle;nonmotile primary cilium;organelle;organelle part;photoreceptor connecting cilium;primary cilium;protein complex														-0.127873	20.6976	-0.253802	0.808853	0.907906	-6.35372	NPC.iPS	Neu.iPS	Neu.NPC
Q15819;G3V113;H0YBP9;H0YBX6	Ubiquitin-conjugating enzyme E2 variant 2	UBE2V2	24.7461	24.7279	24.6333	24.8085	25.2186	24.7325	24.8026	24.4964	25.5244	9	64.1	biological regulation;catabolic process;cell proliferation;cellular catabolic process;cellular macromolecule catabolic process;cellular macromolecule metabolic process;cellular metabolic process;cellular nitrogen compound metabolic process;cellular process;cellular protein metabolic process;cellular response to stimulus;cellular response to stress;DNA catabolic process;DNA catabolic process, exon…	acid-amino acid ligase activity;binding;catalytic activity;enzyme binding;ligase activity;ligase activity, forming carbon-nitrogen bonds;protein binding;small conjugating protein ligase activity;ubiquitin protein ligase binding	cell part;cytoplasm;extracellular membrane-bounded organelle;extracellular organelle;extracellular region part;extracellular vesicular exosome;intracellular membrane-bounded organelle;intracellular organelle;intracellular part;macromolecular complex;membrane-bounded organelle;membrane-bounded vesicle;nucleus;organelle;protein complex;UBC13-MMS2 complex;ubiquitin conjugating enzyme complex;vesicle		0.217427	24.8112	0.760539	0.469969	0.679004	-6.53043	0.238683	24.8218	0.665498	0.523609	0.665715	-6.63038	0.0212567	24.9305	0.055307	0.957337	0.981083	-6.72842	NPC.iPS	Neu.iPS	Neu.NPC
B0QY89;Q9Y262-2;Q9Y262;B0QY90	Eukaryotic translation initiation factor 3 subunit L	EIF3L	25.0028	25.0835	25.769	24.108	22.9088	24.7193	23.9242	24.3471	22.0655	16	32.3	biological regulation;cellular component assembly;cellular component assembly at cellular level;cellular component organization;cellular component organization at cellular level;cellular component organization or biogenesis;cellular component organization or biogenesis at cellular level;cellular macromolecular complex assembly;cellular macromolecular complex subunit organization;cellular process;…	binding;nucleic acid binding;RNA binding;translation factor activity, nucleic acid binding;translation initiation factor activity	cell part;cytoplasmic part;eukaryotic 43S preinitiation complex;eukaryotic 48S preinitiation complex;eukaryotic translation initiation factor 3 complex;fibrillar center;intracellular organelle part;intracellular part;macromolecular complex;membrane;nuclear part;nucleolar part;nucleoplasm;organelle part;protein complex;ribonucleoprotein complex;translation preinitiation complex		-1.37306	24.5986	-2.74737	0.0265326	0.144639	-3.92614	-1.8395	24.3653	-3.12656	0.0132859	0.0504562	-3.3003	-0.466443	23.6788	-0.660736	0.528527	0.758299	-6.49315	NPC.iPS	Neu.iPS	Neu.NPC
Q15843	NEDD8	NEDD8	24.443	24.5028	24.4674	25.3758	26.5085	24.7854	25.4965	24.752	25.8576	3	40.7	anatomical structure morphogenesis;biological regulation;catabolic process;cell surface receptor linked signaling pathway;cellular catabolic process;cellular macromolecule catabolic process;cellular macromolecule metabolic process;cellular metabolic process;cellular process;cellular protein metabolic process;cellular response to stimulus;developmental process;enzyme linked receptor protein signal…	binding;enzyme binding;protein binding;ubiquitin protein ligase binding	cell part;cytoplasmic part;cytosol;extracellular membrane-bounded organelle;extracellular organelle;extracellular region part;extracellular vesicular exosome;intracellular membrane-bounded organelle;intracellular organelle;intracellular part;membrane-bounded organelle;membrane-bounded vesicle;nucleus;organelle;vesicle		1.08552	25.0138	2.40143	0.0447946	0.187707	-4.45203	0.897623	24.9199	2.44819	0.0387202	0.107673	-4.37391	-0.187893	25.4626	-0.355911	0.731699	0.866776	-6.65996	NPC.iPS	Neu.iPS	Neu.NPC
Q15904;A6QRJ1;A6NLC6	V-type proton ATPase subunit S1	ATP6AP1		19.5151		20.4765		19.3638	21.5197	20.6417		2	5.3	ATP hydrolysis coupled proton transport;biological regulation;cation homeostasis;cation transport;cell surface receptor linked signaling pathway;cellular cation homeostasis;cellular chemical homeostasis;cellular homeostasis;cellular ion homeostasis;cellular iron ion homeostasis;cellular metal ion homeostasis;cellular process;cellular response to chemical stimulus;cellular response to endogenous s…	active transmembrane transporter activity;adenyl nucleotide binding;adenyl ribonucleotide binding;ATP binding;ATPase activity;ATPase activity, coupled;ATPase activity, coupled to movement of substances;ATPase activity, coupled to transmembrane movement of ions;ATPase activity, coupled to transmembrane movement of substances;binding;catalytic activity;cation transmembrane transporter activity;cati…	cell part;cytoplasmic part;endosomal part;endosome membrane;extracellular membrane-bounded organelle;extracellular organelle;extracellular region part;extracellular vesicular exosome;integral to membrane;intracellular organelle part;intracellular part;intrinsic to membrane;macromolecular complex;membrane;membrane part;membrane-bounded organelle;membrane-bounded vesicle;organelle;organelle membran…	Epithelial cell signaling in Helicobacter pylori infection;ko5152;Lysosome;Oxidative phosphorylation;Phagosome;Rheumatoid arthritis;Vibrio cholerae infection	0.405125	19.7852	0.596811	0.578985	0.753736	-6.24009	1.56565	20.5588	2.47325	0.0528063	0.132128	-4.13159	1.16053	20.5005	1.93853	0.104951	0.33673	-4.88425	NPC.iPS	Neu.iPS	Neu.NPC
Q15907;Q15907-2;H3BMH2;H3BSC1;P62491-2;P62491	Ras-related protein Rab-11B;Ras-related protein Rab-11A	RAB11B;RAB11A	25.8431	25.9122	26.4732	25.7359	24.8846	25.7147	26.1185	26.0298	25.5324	10	47.7	astral microtubule organization;biological regulation;cation transport;cell cycle process;cell projection organization;cellular component assembly;cellular component assembly at cellular level;cellular component organization;cellular component organization at cellular level;cellular component organization or biogenesis;cellular component organization or biogenesis at cellular level;cellular local…	binding;catalytic activity;cytoskeletal protein binding;GDP binding;GTP binding;GTPase activity;guanyl nucleotide binding;guanyl ribonucleotide binding;hydrolase activity;hydrolase activity, acting on acid anhydrides;hydrolase activity, acting on acid anhydrides, in phosphorus-containing anhydrides;microtubule binding;myosin binding;myosin V binding;nucleoside-triphosphatase activity;nucleotide b…	axon;cell division site part;cell junction;cell part;cell projection;clathrin coated vesicle membrane;clathrin-coated vesicle;cleavage furrow;coated vesicle;coated vesicle membrane;cytoplasmic membrane-bounded vesicle;cytoplasmic part;cytoplasmic vesicle;cytoplasmic vesicle membrane;cytoplasmic vesicle part;cytoskeletal part;cytosol;endocytic vesicle;endocytic vesicle membrane;endosomal part;endo…	Endocrine and other factor-regulated calcium reabsorption;Endocytosis;Pancreatic secretion;Vasopressin-regulated water reabsorption	-0.631143	25.7606	-1.73962	0.122274	0.328953	-5.42033	-0.182623	25.9849	-0.530257	0.609683	0.733808	-6.71618	0.44852	25.6693	1.17509	0.275874	0.549647	-6.02287	NPC.iPS	Neu.iPS	Neu.NPC
Q15942;H0Y2Y8;Q15942-2	Zyxin	ZYX	24.0869	24.0676	23.3971	24.1403	24.8334	23.805	22.2715	20.8685	23.7645	9	26.7	actin cytoskeleton organization;actin filament bundle assembly;actin filament organization;actin filament-based process;biological adhesion;biological regulation;cell adhesion;cell communication;cell surface receptor linked signaling pathway;cell-cell signaling;cell-matrix adhesion;cell-substrate adhesion;cellular component assembly;cellular component assembly at cellular level;cellular component…	binding;cation binding;ion binding;metal ion binding;transition metal ion binding;zinc ion binding	actin filament bundle;actomyosin;adherens junction;anchoring junction;cell junction;cell part;cell-cell adherens junction;cell-cell junction;cell-substrate adherens junction;cell-substrate junction;cytoplasm;cytoskeletal part;focal adhesion;integral to membrane;integral to plasma membrane;intracellular membrane-bounded organelle;intracellular organelle;intracellular organelle part;intracellular p…	Focal adhesion	0.409017	24.0551	1.07523	0.315361	0.548625	-6.24056	-1.54907	23.076	-2.33081	0.0466783	0.122134	-4.55738	-1.95809	23.2805	-2.74896	0.0266623	0.155811	-3.8271	NPC.iPS	Neu.iPS	Neu.NPC
Q16186;A0A087WUX6;A0A087WX59	Proteasomal ubiquitin receptor ADRM1	ADRM1	21.6121	21.8535	20.0856				21.0852		22.7521	2	8.4	biological regulation;biosynthetic process;cellular biosynthetic process;cellular component assembly;cellular component assembly at cellular level;cellular component organization;cellular component organization at cellular level;cellular component organization or biogenesis;cellular component organization or biogenesis at cellular level;cellular macromolecular complex assembly;cellular macromolec…	binding;endopeptidase activator activity;endopeptidase regulator activity;enzyme activator activity;enzyme binding;enzyme regulator activity;peptidase activator activity;peptidase regulator activity;protease binding;proteasome binding;protein binding;protein complex binding	cell part;cytoplasm;integral to membrane;integral to plasma membrane;intracellular membrane-bounded organelle;intracellular organelle;intracellular organelle part;intracellular part;intrinsic to membrane;intrinsic to plasma membrane;macromolecular complex;membrane;membrane part;membrane-bounded organelle;nuclear part;nucleoplasm;nucleus;organelle;organelle part;plasma membrane;plasma membrane par…								0.734962	21.4777	1.0576	0.323593	0.477055	-6.17615							NPC.iPS	Neu.iPS	Neu.NPC
Q16204	Coiled-coil domain-containing protein 6	CCDC6	22.6079	22.9309	22.5243	22.3719	22.5085		21.4974		22.071	5	15		structural constituent of cytoskeleton;structural molecule activity	cell part;cytoplasm;cytoskeleton;intracellular non-membrane-bounded organelle;intracellular organelle;intracellular part;non-membrane-bounded organelle;organelle	Pathways in cancer;Thyroid cancer	-0.247532	22.5887	-0.738581	0.485718	0.68937	-6.43457	-0.903562	22.3263	-2.35002	0.0492307	0.126278	-4.45918	-0.65603	22.1122	-1.43979	0.204243	0.472951	-5.51683	NPC.iPS	Neu.iPS	Neu.NPC
P07093-2;P07093;P07093-3	Glia-derived nexin	SERPINE2								17.6955		1	4.3	anatomical structure development;anatomical structure morphogenesis;behavior;biological regulation;blood coagulation;cellular component organization;cellular component organization at cellular level;cellular component organization or biogenesis;cellular component organization or biogenesis at cellular level;cellular process;cerebellar granular layer morphogenesis;coagulation;detection of abiotic …	binding;carbohydrate binding;endopeptidase inhibitor activity;endopeptidase regulator activity;enzyme inhibitor activity;enzyme regulator activity;glycosaminoglycan binding;heparin binding;pattern binding;peptidase inhibitor activity;peptidase regulator activity;polysaccharide binding;protein binding;receptor binding;serine-type endopeptidase inhibitor activity	cell part;cytoplasmic membrane-bounded vesicle;cytoplasmic part;cytoplasmic vesicle;cytosol;extracellular matrix;extracellular region;extracellular region part;extracellular space;extrinsic to external side of plasma membrane;extrinsic to membrane;extrinsic to plasma membrane;intracellular membrane-bounded organelle;intracellular organelle;intracellular part;membrane part;membrane-bounded organel…																				NPC.iPS	Neu.iPS	Neu.NPC
Q16222-2;Q16222-3;Q16222	UDP-N-acetylhexosamine pyrophosphorylase;UDP-N-acetylgalactosamine pyrophosphorylase;UDP-N-acetylglucosamine pyrophosphorylase	UAP1		20.6549				21.5928	20.8385	21.0023	20.5712	2	5.7	alcohol biosynthetic process;alcohol metabolic process;amino sugar biosynthetic process;amino sugar metabolic process;biosynthetic process;carbohydrate biosynthetic process;carbohydrate metabolic process;cellular biosynthetic process;cellular carbohydrate biosynthetic process;cellular carbohydrate metabolic process;cellular macromolecule metabolic process;cellular metabolic process;cellular nitro…	binding;carbohydrate binding;catalytic activity;identical protein binding;nucleotidyltransferase activity;protein binding;transferase activity;transferase activity, transferring phosphorus-containing groups;UDP-N-acetylglucosamine diphosphorylase activity;uridylyltransferase activity	cell part;cytoplasm;cytoplasmic part;cytosol;intracellular organelle part;intracellular part;membrane;nuclear part;nucleoplasm;organelle part;plasma membrane	Amino sugar and nucleotide sugar metabolism	0.93786	21.1238	1.41476	0.238235	0.47546	-5.32856	0.149093	20.7667	0.304492	0.770433	0.854136	-6.47586	-0.788767	21.0012	-1.5539	0.175559	0.441865	-5.24671	NPC.iPS	Neu.iPS	Neu.NPC
Q16352;A0A087WYG8	Alpha-internexin	INA	18.7559	20.7114	20.3642	24.6606	26.0051	22.0527	28.9851	28.5345	30.169	37	75.8	anatomical structure development;cell differentiation;cellular component organization;cellular component organization at cellular level;cellular component organization or biogenesis;cellular component organization or biogenesis at cellular level;cellular developmental process;cellular process;cytoskeleton organization;developmental process;intermediate filament cytoskeleton organization;intermedi…	structural constituent of cytoskeleton;structural molecule activity	axon part;cell part;cell projection part;cytoskeletal part;cytoskeleton;extracellular region part;extracellular space;intermediate filament;intermediate filament cytoskeleton;intracellular non-membrane-bounded organelle;intracellular organelle;intracellular organelle part;intracellular part;macromolecular complex;membrane;neurofilament;non-membrane-bounded organelle;nuclear membrane;nuclear part;…		4.29566	22.0917	4.35578	0.00277059	0.0430527	-1.58584	9.28571	24.5867	15.2633	2.06488e-07	7.38757e-05	7.68914	4.99006	26.7345	5.17507	0.00103497	0.028277	-0.475736	NPC.iPS	Neu.iPS	Neu.NPC
Q16401-2;Q16401	26S proteasome non-ATPase regulatory subunit 5	PSMD5	23.2561	22.7378	22.6015	21.6744		21.8229	21.4225			6	18.4	activation of immune response;activation of innate immune response;anaphase-promoting complex-dependent proteasomal ubiquitin-dependent protein catabolic process;antigen processing and presentation;antigen processing and presentation of exogenous antigen;antigen processing and presentation of exogenous peptide antigen;antigen processing and presentation of exogenous peptide antigen via MHC class …		cell part;cytoplasmic part;cytosol;intracellular organelle part;intracellular part;macromolecular complex;nuclear part;nucleoplasm;organelle part;proteasome accessory complex;proteasome complex;protein complex		-1.11651	22.4185	-3.08345	0.0192211	0.120882	-3.42088	-1.44264	22.5045	-2.7775	0.0300809	0.0916763	-3.69496	-0.32613	21.6399	-0.570915	0.595323	0.797189	-6.14723	NPC.iPS	Neu.iPS	Neu.NPC
Q16531;F5GY55	DNA damage-binding protein 1	DDB1	25.6201	25.3489	25.9819	25.4672	23.5129	25.83	25.2522	24.864	24.1883	21	24.7	biological regulation;biosynthetic process;catabolic process;cell surface receptor linked signaling pathway;cellular biosynthetic process;cellular catabolic process;cellular component organization;cellular component organization at cellular level;cellular component organization or biogenesis;cellular component organization or biogenesis at cellular level;cellular macromolecule biosynthetic proces…	binding;damaged DNA binding;DNA binding;nucleic acid binding	cell part;CUL4 RING ubiquitin ligase complex;Cul4A-RING ubiquitin ligase complex;Cul4B-RING ubiquitin ligase complex;cullin-RING ubiquitin ligase complex;cytoplasm;extracellular membrane-bounded organelle;extracellular organelle;extracellular region part;extracellular space;extracellular vesicular exosome;intracellular membrane-bounded organelle;intracellular organelle;intracellular organelle par…	Nucleotide excision repair;Ubiquitin mediated proteolysis	-0.713613	25.2935	-1.18844	0.270626	0.508283	-6.11816	-0.88214	25.2092	-2.30962	0.0482793	0.124381	-4.59031	-0.168527	24.8524	-0.26211	0.800283	0.901754	-6.69193	NPC.iPS	Neu.iPS	Neu.NPC
A0A087WTV6;J3KR12;Q96C36;A0A087WZR9	Pyrroline-5-carboxylate reductase 2;Pyrroline-5-carboxylate reductase	PYCR2	23.6556	23.405	21.7493	21.5375	22.563	22.2893	21.9839	22.2765	22.503	4	25.6	amine biosynthetic process;amine metabolic process;biosynthetic process;carboxylic acid biosynthetic process;carboxylic acid metabolic process;cellular amine metabolic process;cellular amino acid biosynthetic process;cellular amino acid metabolic process;cellular biosynthetic process;cellular ketone metabolic process;cellular metabolic process;cellular nitrogen compound biosynthetic process;cellu…	catalytic activity;oxidoreductase activity;oxidoreductase activity, acting on the CH-NH group of donors;oxidoreductase activity, acting on the CH-NH group of donors, NAD or NADP as acceptor;pyrroline-5-carboxylate reductase activity	cell part;cytoplasm;intracellular part	Arginine and proline metabolism	-0.806657	22.5333	-1.45388	0.186172	0.419309	-5.80043	-0.682153	22.5955	-1.32485	0.220179	0.361011	-5.98778	0.124503	22.1922	0.323408	0.755209	0.879356	-6.67211	NPC.iPS	Neu.iPS	Neu.NPC
B0QYK0;Q01844-6;Q01844-3;Q01844;Q01844-5;C9JGE3;Q01844-2	RNA-binding protein EWS	EWSR1	23.6216	23.667	23.4035	24.0297	25.3824	23.6805	23.0247	23.626	23.9975	4	11.7	biological regulation;biosynthetic process;cellular biosynthetic process;cellular macromolecule biosynthetic process;cellular macromolecule metabolic process;cellular metabolic process;cellular nitrogen compound metabolic process;cellular process;macromolecule biosynthetic process;macromolecule metabolic process;metabolic process;nitrogen compound metabolic process;nucleic acid metabolic process;…	binding;cation binding;identical protein binding;ion binding;metal ion binding;nucleic acid binding;nucleotide binding;protein binding;RNA binding;transition metal ion binding;zinc ion binding	cell part;cytoplasm;intracellular membrane-bounded organelle;intracellular non-membrane-bounded organelle;intracellular organelle;intracellular organelle part;intracellular part;membrane;membrane-bounded organelle;non-membrane-bounded organelle;nuclear part;nucleolus;nucleoplasm;nucleus;organelle;organelle part;plasma membrane		0.80014	23.9641	1.72581	0.124822	0.332906	-5.43942	-0.0146733	23.5567	-0.0414646	0.967896	0.981888	-6.86833	-0.814813	23.9568	-1.56118	0.15956	0.420318	-5.55347	NPC.iPS	Neu.iPS	Neu.NPC
Q16537-3;Q16537-2;Q16537	Serine/threonine-protein phosphatase 2A 56 kDa regulatory subunit epsilon isoform	PPP2R5E	22.4004	22.2115	22.3375	22.1669		21.9094	23.0367	23.5602	21.9403	5	17.6	biological regulation;cellular process;cellular response to stimulus;regulation of biological process;regulation of catalytic activity;regulation of cellular metabolic process;regulation of cellular process;regulation of dephosphorylation;regulation of hydrolase activity;regulation of metabolic process;regulation of molecular function;regulation of phosphatase activity;regulation of phosphate met…	enzyme regulator activity;phosphatase regulator activity;protein phosphatase regulator activity;protein phosphatase type 2A regulator activity	cell part;cytoplasm;intracellular part;macromolecular complex;protein complex;protein phosphatase type 2A complex;protein serine/threonine phosphatase complex	Meiosis - yeast;mRNA surveillance pathway;Oocyte meiosis;Wnt signaling pathway	-0.27833	22.2051	-0.854911	0.422696	0.640985	-6.33871	0.52927	22.5811	1.20204	0.262188	0.412713	-6.13181	0.8076	22.5227	1.46616	0.189184	0.455086	-5.57041	NPC.iPS	Neu.iPS	Neu.NPC
Q16543;K7EQA9;K7EKQ2	Hsp90 co-chaperone Cdc37;Hsp90 co-chaperone Cdc37, N-terminally processed	CDC37	24.673	24.128	25.0282	23.9984	24.0741	23.832	23.9778	23.5638	23.8343	5	19.3	biological regulation;cellular macromolecule metabolic process;cellular metabolic process;cellular process;cellular protein metabolic process;establishment of localization;establishment of localization in cell;establishment of protein localization;intracellular protein transport;intracellular transport;macromolecule metabolic process;metabolic process;posttranscriptional regulation of gene expres…	binding;chaperone binding;enzyme binding;heat shock protein binding;kinase binding;protein binding;unfolded protein binding	cell part;cell projection membrane;cell projection part;cytoplasm;cytoplasmic part;cytosol;extracellular membrane-bounded organelle;extracellular organelle;extracellular region part;extracellular vesicular exosome;intracellular part;leading edge membrane;macromolecular complex;membrane part;membrane-bounded organelle;membrane-bounded vesicle;organelle;plasma membrane part;protein complex;ruffle m…		-0.64159	24.289	-1.95257	0.0887277	0.274578	-5.11861	-0.817767	24.2009	-2.32729	0.0469403	0.12241	-4.56285	-0.176177	23.8801	-0.566622	0.587502	0.791968	-6.55455	NPC.iPS	Neu.iPS	Neu.NPC
Q16555;Q16555-2	Dihydropyrimidinase-related protein 2	DPYSL2	28.0599	27.8972	27.9241	29.6655	29.9474	29.1236	30.6959	30.1244	31.0962	33	71.5	anatomical structure development;axon guidance;biological regulation;brain development;cellular component organization;cellular component organization at cellular level;cellular component organization or biogenesis;cellular component organization or biogenesis at cellular level;cellular membrane organization;cellular metabolic process;cellular nitrogen compound metabolic process;cellular process;…	catalytic activity;dihydropyrimidinase activity;hydrolase activity;hydrolase activity, acting on carbon-nitrogen (but not peptide) bonds;hydrolase activity, acting on carbon-nitrogen (but not peptide) bonds, in cyclic amides	axon part;cell body;cell part;cell projection;cell projection part;cytoplasmic part;cytoskeleton;cytosol;dendrite;extracellular membrane-bounded organelle;extracellular organelle;extracellular region part;extracellular vesicular exosome;growth cone;intracellular membrane-bounded organelle;intracellular non-membrane-bounded organelle;intracellular organelle;intracellular part;macromolecular comple…	Axon guidance	1.61844	28.7696	5.08578	0.00112294	0.0264452	-0.639222	2.67841	29.2996	7.64038	4.70434e-05	0.00131442	2.53353	1.05997	30.1088	2.6533	0.0307766	0.170257	-3.97155	NPC.iPS	Neu.iPS	Neu.NPC
Q16643;Q16643-3;Q16643-2;D6R9W4	Drebrin	DBN1	26.0335	26.1377	25.9967	26.926	27.0851	26.2542	27.0105	26.5328	27.4925	23	50.2	actin cytoskeleton organization;actin filament organization;actin filament-based process;biological regulation;cell communication;cell communication by chemical coupling;cell communication by electrical coupling;cell proliferation;cellular component organization;cellular component organization at cellular level;cellular component organization or biogenesis;cellular component organization or bioge…	actin binding;binding;cytoskeletal protein binding;profilin binding;protein binding	actin cytoskeleton;actomyosin;cell cortex;cell junction;cell part;cell projection;cell-cell junction;cytoplasm;cytoplasmic part;cytoskeletal part;cytoskeleton;dendrite;gap junction;intracellular;intracellular non-membrane-bounded organelle;intracellular organelle;intracellular organelle part;intracellular part;membrane;neuron projection;non-membrane-bounded organelle;organelle;organelle part;plas…		0.699133	26.4055	2.16529	0.0642031	0.230429	-4.80648	0.95596	26.534	2.74571	0.0241391	0.0782301	-3.90395	0.256827	26.8835	0.639013	0.541811	0.767602	-6.50808	NPC.iPS	Neu.iPS	Neu.NPC
P07099	Epoxide hydrolase 1	EPHX1	21.5228	21.96	22.2591			21.0599	23.3936	23.5071	21.167	10	25.1	aromatic compound catabolic process;catabolic process;cellular aromatic compound metabolic process;cellular catabolic process;cellular metabolic process;cellular process;metabolic process;response to chemical stimulus;response to organic cyclic compound;response to organic substance;response to stimulus;response to toxin	catalytic activity;cis-stilbene-oxide hydrolase activity;epoxide hydrolase activity;ether hydrolase activity;hydrolase activity;hydrolase activity, acting on ether bonds	cell part;cytoplasmic part;endoplasmic reticulum membrane;endoplasmic reticulum part;integral to membrane;intracellular organelle part;intracellular part;intrinsic to membrane;membrane;membrane part;organelle membrane;organelle part	Bile secretion;Metabolism of xenobiotics by cytochrome P45	-0.854137	21.7005	-1.6968	0.144517	0.359384	-5.16986	0.775247	22.3016	1.25372	0.243762	0.390518	-6.07236	1.62938	22.2819	1.5696	0.171927	0.436772	-5.22742	NPC.iPS	Neu.iPS	Neu.NPC
Q16658	Fascin	FSCN1	27.9842	27.9018	28.5753	27.9036	27.2545	27.5814	28.8659	28.8745	28.9329	38	73.2	actin cytoskeleton organization;actin filament bundle assembly;actin filament organization;actin filament-based process;cell migration;cell motility;cell proliferation;cellular component assembly;cellular component assembly at cellular level;cellular component movement;cellular component organization;cellular component organization at cellular level;cellular component organization or biogenesis;c…	actin binding;actin filament binding;binding;cytoskeletal protein binding;drug binding;protein binding	actin cytoskeleton;actin filament bundle;actomyosin;cell junction;cell part;cell projection;cytoplasm;cytoplasmic part;cytoskeletal part;cytoskeleton;cytosol;extracellular membrane-bounded organelle;extracellular organelle;extracellular region part;extracellular vesicular exosome;filopodium;intracellular non-membrane-bounded organelle;intracellular organelle;intracellular organelle part;intracell…		-0.573967	27.8668	-1.71979	0.125948	0.333267	-5.44772	0.7373	28.5224	2.27074	0.0513608	0.129756	-4.65058	1.31127	28.2355	4.04581	0.00422929	0.059448	-1.93619	NPC.iPS	Neu.iPS	Neu.NPC
Q16666-3;Q16666-6;Q16666-2;Q16666;H3BM18;X6RHM1	Gamma-interferon-inducible protein 16	IFI16				19.2418		20.1512		19.6263		5	8.9	activation of immune response;activation of innate immune response;anatomical structure development;autophagy;biological regulation;catabolic process;cell communication;cell cycle;cell differentiation;cell proliferation;cellular catabolic process;cellular developmental process;cellular metabolic process;cellular process;cellular response to abiotic stimulus;cellular response to external stimulus;…	binding;core promoter binding;core promoter proximal region DNA binding;core promoter proximal region sequence-specific DNA binding;DNA binding;double-stranded DNA binding;identical protein binding;nucleic acid binding;nucleic acid binding transcription factor activity;protein binding;regulatory region DNA binding;regulatory region nucleic acid binding;RNA polymerase II core promoter proximal reg…	cell part;cytoplasm;cytoplasmic part;cytosol;intracellular membrane-bounded organelle;intracellular non-membrane-bounded organelle;intracellular organelle;intracellular organelle part;intracellular part;membrane;membrane-bounded organelle;non-membrane-bounded organelle;nuclear body;nuclear part;nuclear speck;nucleolus;nucleoplasm;nucleoplasm part;nucleus;organelle;organelle part														-0.0702	19.6731	-0.103482	0.922023	0.96548	-6.327	NPC.iPS	Neu.iPS	Neu.NPC
Q16698-2;Q16698;E5RJG7;E5RFV2	2,4-dienoyl-CoA reductase, mitochondrial	DECR1	22.7821	21.8233	22.3768	23.4098	22.5541	23.4833	25.1539	24.5635	24.4965	7	24.2	carboxylic acid catabolic process;carboxylic acid metabolic process;catabolic process;cellular catabolic process;cellular component assembly;cellular component organization;cellular component organization or biogenesis;cellular ketone metabolic process;cellular lipid catabolic process;cellular lipid metabolic process;cellular metabolic process;cellular process;fatty acid beta-oxidation;fatty acid…	2,4-dienoyl-CoA reductase (NADPH) activity;binding;catalytic activity;coenzyme binding;cofactor binding;NADP binding;NADPH binding;nucleotide binding;oxidoreductase activity;oxidoreductase activity, acting on NADH or NADPH;oxidoreductase activity, acting on the CH-CH group of donors;oxidoreductase activity, acting on the CH-CH group of donors, NAD or NADP as acceptor	cell part;cytoplasm;cytoplasmic part;extracellular membrane-bounded organelle;extracellular organelle;extracellular region part;extracellular vesicular exosome;intracellular membrane-bounded organelle;intracellular organelle;intracellular organelle lumen;intracellular organelle part;intracellular part;membrane-bounded organelle;membrane-bounded vesicle;membrane-enclosed lumen;mitochondrial matrix…		0.82166	22.7382	2.07443	0.0737334	0.247476	-4.94085	2.41057	23.5327	6.4106	0.000168572	0.00300529	1.22408	1.58891	23.9435	4.01349	0.00441535	0.0599638	-1.98084	NPC.iPS	Neu.iPS	Neu.NPC
Q16706	Alpha-mannosidase 2	MAN2A1	20.6053		20.9915							1	1.8	alcohol metabolic process;anatomical structure development;anatomical structure morphogenesis;biological regulation;carbohydrate metabolic process;cellular carbohydrate metabolic process;cellular component organization;cellular component organization at cellular level;cellular component organization or biogenesis;cellular component organization or biogenesis at cellular level;cellular macromolecu…	binding;carbohydrate binding;catalytic activity;cation binding;hydrolase activity;hydrolase activity, acting on glycosyl bonds;hydrolase activity, hydrolyzing N-glycosyl compounds;hydrolase activity, hydrolyzing O-glycosyl compounds;ion binding;mannosidase activity;mannosyl-oligosaccharide 1,3-1,6-alpha-mannosidase activity;mannosyl-oligosaccharide mannosidase activity;metal ion binding;transitio…	cell part;cis-Golgi network;cytoplasmic part;extracellular membrane-bounded organelle;extracellular organelle;extracellular region part;extracellular vesicular exosome;Golgi apparatus part;Golgi membrane;integral to membrane;intracellular organelle part;intracellular part;intrinsic to membrane;membrane;membrane part;membrane-bounded organelle;membrane-bounded vesicle;organelle;organelle membrane;…	N-Glycan biosynthesis;Various types of N-glycan biosynthesis																			NPC.iPS	Neu.iPS	Neu.NPC
Q16718;F8WAS3;A0A087X1G1;H7BYD0;Q16718-2;C9IZN5	NADH dehydrogenase [ubiquinone] 1 alpha subcomplex subunit 5	NDUFA5	23.0478	22.6501		23.0714	23.5231	22.4108	22.8846	23.0265	23.5261	4	52.6	cellular metabolic process;cellular process;electron transport chain;generation of precursor metabolites and energy;metabolic process;mitochondrial electron transport, NADH to ubiquinone;oxidation-reduction process;respiratory electron transport chain;small molecule metabolic process	catalytic activity;NADH dehydrogenase (quinone) activity;NADH dehydrogenase (ubiquinone) activity;NADH dehydrogenase activity;oxidoreductase activity;oxidoreductase activity, acting on NADH or NADPH;oxidoreductase activity, acting on NADH or NADPH, quinone or similar compound as acceptor	cell part;cytoplasmic part;intracellular organelle part;intracellular part;macromolecular complex;membrane;membrane part;mitochondrial inner membrane;mitochondrial membrane;mitochondrial membrane part;mitochondrial part;mitochondrial respiratory chain complex I;NADH dehydrogenase complex;organelle inner membrane;organelle membrane;organelle part;protein complex;respiratory chain complex I	Alzheimer's disease;Huntington's disease;Oxidative phosphorylation;Parkinson's disease	0.152852	22.9407	0.351676	0.736096	0.858171	-6.66252	0.296768	23.027	0.757672	0.472122	0.618598	-6.44948	0.143917	23.0738	0.357742	0.730383	0.865825	-6.65924	NPC.iPS	Neu.iPS	Neu.NPC
Q16777;Q6FI13;Q96QV6	Histone H2A type 2-C;Histone H2A type 2-A;Histone H2A type 1-A	HIST2H2AC;HIST2H2AA3;HIST1H2AA	20.9344	22.6855	22.8158				25.8159	25.2775	24.6311	1	22.5		binding;DNA binding;nucleic acid binding	cell part;chromosomal part;extracellular membrane-bounded organelle;extracellular organelle;extracellular region part;extracellular vesicular exosome;intracellular membrane-bounded organelle;intracellular organelle;intracellular organelle part;intracellular part;macromolecular complex;membrane-bounded organelle;membrane-bounded vesicle;nucleosome;nucleus;organelle;organelle part;protein-DNA compl…	Systemic lupus erythematosus							3.09622	23.6934	5.51506	0.000477953	0.00589277	0.14348							NPC.iPS	Neu.iPS	Neu.NPC
B0QYV1;O43251-5;O43251-10;O43251-2;O43251;O43251-6;O43251-8;I3L1D4;B0QYY7;S4R469;F8VR27;F8VZY7;B0QYY4;A0A087X2B1;J3KNW3;B7Z1U7;F8VZG9;O43251-9;Q9NWB1-3;O43251-4;Q9NWB1-4;Q9NWB1-5;Q9NWB1;O43251-7;Q9NWB1-2;B0QYY6;S4R3K7;J3QQZ2;J3QRF4;A6NFN3;A6NFN3-2;O43251-3	RNA binding protein fox-1 homolog;RNA binding protein fox-1 homolog 2;RNA binding protein fox-1 homolog 1;RNA binding protein fox-1 homolog 3	RBFOX2;RBFOX1;RBFOX3	20.2738	20.8583		20.3197	19.3391				20.8864	4	17.4	anatomical structure morphogenesis;biological regulation;cell migration;cell migration in hindbrain;cell motility;cell part morphogenesis;cell projection morphogenesis;cell projection organization;cellular component morphogenesis;cellular component movement;cellular component organization;cellular component organization at cellular level;cellular component organization or biogenesis;cellular comp…	binding;DNA binding;mRNA binding;nucleic acid binding;nucleotide binding;protein binding;protein binding transcription factor activity;protein C-terminus binding;RNA binding;transcription cofactor activity;transcription corepressor activity;transcription factor binding;transcription factor binding transcription factor activity	cell part;cytoplasm;cytoplasmic part;Golgi apparatus part;intracellular membrane-bounded organelle;intracellular organelle;intracellular organelle part;intracellular part;membrane-bounded organelle;nuclear part;nucleoplasm;nucleus;organelle;organelle part;perikaryon;trans-Golgi network		-0.736625	20.1977	-1.45066	0.200799	0.434686	-5.61013	0.320345	20.6728	0.5486	0.605247	0.730745	-6.30097	1.05697	20.1817	1.52147	0.194854	0.46165	-5.23538	NPC.iPS	Neu.iPS	Neu.NPC
Q16795	NADH dehydrogenase [ubiquinone] 1 alpha subcomplex subunit 9, mitochondrial	NDUFA9	21.3491	20.496	21.4676	21.7935		21.6367	22.6434	21.2789	19.9788	3	11.7	biosynthetic process;cation transport;cellular metabolic process;cellular process;electron transport chain;establishment of localization;generation of precursor metabolites and energy;ion transport;lipid biosynthetic process;lipid metabolic process;metabolic process;metal ion transport;mitochondrial electron transport, NADH to ubiquinone;monovalent inorganic cation transport;oxidation-reduction p…	3-beta-hydroxy-delta5-steroid dehydrogenase activity;binding;catalytic activity;coenzyme binding;cofactor binding;NADH dehydrogenase (quinone) activity;NADH dehydrogenase (ubiquinone) activity;NADH dehydrogenase activity;oxidoreductase activity;oxidoreductase activity, acting on CH-OH group of donors;oxidoreductase activity, acting on NADH or NADPH;oxidoreductase activity, acting on NADH or NADPH…	cell part;cytoplasmic part;intracellular membrane-bounded organelle;intracellular organelle;intracellular organelle lumen;intracellular organelle part;intracellular part;macromolecular complex;membrane;membrane part;membrane-bounded organelle;membrane-enclosed lumen;mitochondrial inner membrane;mitochondrial matrix;mitochondrial membrane;mitochondrial membrane part;mitochondrial part;mitochondria…	Alzheimer's disease;Huntington's disease;Oxidative phosphorylation;Parkinson's disease	0.610867	21.3486	1.47155	0.187384	0.421036	-5.6712	0.196167	21.2023	0.306114	0.766979	0.851514	-6.81769	-0.4147	21.4663	-0.544361	0.60433	0.802706	-6.45613	NPC.iPS	Neu.iPS	Neu.NPC
Q16799-3;A8MT72;Q2NKQ5;Q16799-2	Reticulon-1;Reticulon	RTN1	18.4387						26.9619	25.8427	23.9496	7	31.7	cell differentiation;cellular developmental process;cellular process;developmental process;neuron differentiation		cell part;cytoplasmic part;endoplasmic reticulum membrane;endoplasmic reticulum part;integral to endoplasmic reticulum membrane;integral to membrane;integral to organelle membrane;intracellular organelle part;intracellular part;intrinsic to endoplasmic reticulum membrane;intrinsic to membrane;intrinsic to organelle membrane;membrane;membrane part;organelle membrane;organelle part								7.14603	23.7982	6.55639	0.000466177	0.00589277	0.538608							NPC.iPS	Neu.iPS	Neu.NPC
Q16822;B4DW73;H0YML5;H0YM31;A0A0A0MS74;Q16822-2	Phosphoenolpyruvate carboxykinase [GTP], mitochondrial	PCK2	26.3036	25.1374	25.4067	19.693		20.397				17	31.4	alcohol biosynthetic process;alcohol metabolic process;alditol biosynthetic process;alditol metabolic process;biological regulation;biosynthetic process;carbohydrate biosynthetic process;carbohydrate homeostasis;carbohydrate metabolic process;carboxylic acid metabolic process;cellular biosynthetic process;cellular carbohydrate biosynthetic process;cellular carbohydrate metabolic process;cellular …	binding;carbon-carbon lyase activity;carboxylic acid binding;carboxy-lyase activity;catalytic activity;cation binding;GDP binding;GTP binding;guanyl nucleotide binding;guanyl ribonucleotide binding;ion binding;kinase activity;lyase activity;magnesium ion binding;manganese ion binding;metal ion binding;nucleotide binding;phosphoenolpyruvate carboxykinase (GTP) activity;phosphoenolpyruvate carboxyk…	cell part;cytoplasm;cytoplasmic part;cytosol;extracellular membrane-bounded organelle;extracellular organelle;extracellular region part;extracellular vesicular exosome;intracellular membrane-bounded organelle;intracellular organelle;intracellular organelle lumen;intracellular organelle part;intracellular part;membrane-bounded organelle;membrane-bounded vesicle;membrane-enclosed lumen;mitochondria…	Adipocytokine signaling pathway;Citrate cycle (TCA cycle);Glycolysis / Gluconeogenesis;Insulin signaling pathway;PPAR signaling pathway;Proximal tubule bicarbonate reclamation;Pyruvate metabolism	-5.5709	23.3875	-11.7307	1.20334e-05	0.00236155	3.98471													NPC.iPS	Neu.iPS	Neu.NPC
P07108;B8ZWD1;A0A0A0MTI5;P07108-3;P07108-2;P07108-6;P07108-4;P07108-5	Acyl-CoA-binding protein	DBI	24.6117	24.8333	24.3003	25.4669	26.5509	24.3896	23.5418	23.2973	24.3415	5	71.3	acylglycerol metabolic process;anatomical structure development;behavior;behavioral defense response;behavioral fear response;biological regulation;cellular lipid metabolic process;cellular metabolic process;cellular process;cognition;defense response;developmental process;epidermis development;establishment of localization;fear response;glycerol ether metabolic process;glycerolipid metabolic pro…	benzodiazepine receptor binding;binding;carboxylic acid binding;coenzyme binding;cofactor binding;fatty acid binding;fatty-acyl-CoA binding;lipid binding;monocarboxylic acid binding;protein binding;protein dimerization activity;receptor binding	cell part;cytoplasmic part;endoplasmic reticulum;endoplasmic reticulum part;extracellular membrane-bounded organelle;extracellular organelle;extracellular region part;extracellular vesicular exosome;Golgi apparatus;intracellular membrane-bounded organelle;intracellular organelle;intracellular organelle part;intracellular part;membrane-bounded organelle;membrane-bounded vesicle;mitochondrion;organ…	PPAR signaling pathway	0.887363	25.0254	1.65494	0.1387	0.353258	-5.53636	-0.85491	24.1543	-2.26406	0.0519088	0.130373	-4.6609	-1.74227	24.598	-2.95997	0.019483	0.132993	-3.50924	NPC.iPS	Neu.iPS	Neu.NPC
Q16831;F8WD51;C9J486;C9JIP2;B4DND0;C9K0J2	Uridine phosphorylase 1	UPP1	20.2532	20.1888							19.3428	4	15.8	biosynthetic process;catabolic process;cell communication;cellular aromatic compound metabolic process;cellular biosynthetic process;cellular catabolic process;cellular metabolic compound salvage;cellular metabolic process;cellular nitrogen compound biosynthetic process;cellular nitrogen compound catabolic process;cellular nitrogen compound metabolic process;cellular process;cellular response to …	catalytic activity;transferase activity;transferase activity, transferring glycosyl groups;transferase activity, transferring pentosyl groups;uridine phosphorylase activity	cell part;cytoplasmic part;cytosol;intracellular part	Drug metabolism - other enzymes;Pyrimidine metabolism							-0.878225	19.9282	-1.61971	0.162016	0.29049	-5.23968							NPC.iPS	Neu.iPS	Neu.NPC
Q16850-2;Q16850;H7C0D0	Lanosterol 14-alpha demethylase	CYP51A1	21.1743	21.3661	21.298	19.0206	19.3046	21.5023	22.9849		20.6837	2	9.7	alcohol metabolic process;biosynthetic process;cellular metabolic process;cellular process;cholesterol biosynthetic process;cholesterol biosynthetic process via 24,25-dihydrolanosterol;cholesterol metabolic process;demethylation;lipid biosynthetic process;lipid metabolic process;metabolic process;one-carbon metabolic process;primary metabolic process;small molecule metabolic process;steroid biosy…	binding;catalytic activity;cation binding;demethylase activity;heme binding;ion binding;iron ion binding;metal ion binding;monooxygenase activity;oxidoreductase activity;oxidoreductase activity, acting on paired donors, with incorporation or reduction of molecular oxygen;oxidoreductase activity, acting on paired donors, with incorporation or reduction of molecular oxygen, NADH or NADPH as one don…	cell part;cytoplasmic part;endoplasmic reticulum;endoplasmic reticulum membrane;endoplasmic reticulum part;integral to membrane;intracellular membrane-bounded organelle;intracellular organelle;intracellular organelle part;intracellular part;intrinsic to membrane;membrane;membrane part;membrane-bounded organelle;organelle;organelle membrane;organelle part	Steroid biosynthesis	-1.33696	20.611	-2.12494	0.0682748	0.235941	-4.86632	0.554852	21.5014	0.856469	0.418653	0.567636	-6.3675	1.89182	20.6992	1.95582	0.0945003	0.317968	-4.92293	NPC.iPS	Neu.iPS	Neu.NPC
Q16851;A0A087WYS1;E7EUC7	UTP--glucose-1-phosphate uridylyltransferase	UGP2	28.2686	28.2396	28.9003	20.9154	24.0739	23.8054	24.5497	22.9406	25.1539	20	45.5	alcohol metabolic process;biosynthetic process;carbohydrate biosynthetic process;carbohydrate metabolic process;carboxylic acid biosynthetic process;carboxylic acid metabolic process;cellular biosynthetic process;cellular carbohydrate biosynthetic process;cellular carbohydrate metabolic process;cellular glucan metabolic process;cellular glucuronidation;cellular ketone metabolic process;cellular m…	binding;carbohydrate binding;catalytic activity;cation binding;glucose binding;identical protein binding;ion binding;metal ion binding;monosaccharide binding;nucleotide binding;nucleotidyltransferase activity;protein binding;pyrimidine nucleotide binding;pyrimidine ribonucleotide binding;ribonucleotide binding;sugar binding;transferase activity;transferase activity, transferring phosphorus-contai…	cell part;cytoplasmic part;cytosol;extracellular membrane-bounded organelle;extracellular organelle;extracellular region part;extracellular vesicular exosome;intracellular membrane-bounded organelle;intracellular organelle;intracellular part;membrane-bounded organelle;membrane-bounded vesicle;nucleus;organelle;vesicle	Amino sugar and nucleotide sugar metabolism;Galactose metabolism;Pentose and glucuronate interconversions;Starch and sucrose metabolism	-5.53796	25.7005	-6.95468	0.000153579	0.00841114	1.4301	-4.25479	26.3421	-7.59301	4.92679e-05	0.0013291	2.4865	1.28317	23.5731	1.38119	0.206926	0.475426	-5.78207	NPC.iPS	Neu.iPS	Neu.NPC
Q16864;Q16864-2	V-type proton ATPase subunit F	ATP6V1F	21.3854	21.7183		21.6824	22.4468	22.438	23.2699	22.7641	23.0678	3	40.3	ATP hydrolysis coupled proton transport;biological regulation;cation homeostasis;cation transport;cell surface receptor linked signaling pathway;cellular cation homeostasis;cellular chemical homeostasis;cellular component organization;cellular component organization at cellular level;cellular component organization or biogenesis;cellular component organization or biogenesis at cellular level;cell…	active transmembrane transporter activity;ATPase activity;ATPase activity, coupled;ATPase activity, coupled to movement of substances;ATPase activity, coupled to transmembrane movement of ions;ATPase activity, coupled to transmembrane movement of substances;ATPase activity, uncoupled;catalytic activity;cation transmembrane transporter activity;cation-transporting ATPase activity;hydrogen ion tran…	cell part;cytoplasmic part;cytosol;extracellular membrane-bounded organelle;extracellular organelle;extracellular region part;extracellular vesicular exosome;intracellular organelle part;intracellular part;macromolecular complex;membrane;membrane part;membrane-bounded organelle;membrane-bounded vesicle;organelle;organelle part;protein complex;proton-transporting two-sector ATPase complex;proton-t…	Collecting duct acid secretion;Epithelial cell signaling in Helicobacter pylori infection;Oxidative phosphorylation;Phagosome;Rheumatoid arthritis;Vibrio cholerae infection	0.637202	21.9342	1.61669	0.152806	0.371755	-5.4854	1.48209	22.4411	3.96465	0.00487105	0.0250709	-2.09312	0.844887	22.6115	2.32723	0.0504051	0.221877	-4.46238	NPC.iPS	Neu.iPS	Neu.NPC
Q1KMD3;H3BQZ7	Heterogeneous nuclear ribonucleoprotein U-like protein 2	HNRNPUL2;HNRNPUL2-BSCL2	24.1972	24.6448	25.091	25.911	25.8121	25.9319	26.192	26.4175	26.4552	20	29.5			cell part;intracellular membrane-bounded organelle;intracellular organelle;intracellular part;membrane;membrane-bounded organelle;nucleus;organelle		1.24069	25.2647	3.82968	0.00557701	0.0610539	-2.31755	1.71061	25.4996	4.96442	0.000957	0.00897425	-0.579166	0.46992	26.12	1.56269	0.159207	0.419915	-5.55149	NPC.iPS	Neu.iPS	Neu.NPC
Q27J81-2;Q27J81;Q27J81-3	Inverted formin-2	INF2	19.7053	20.4623	22.1658	19.5258		19.4253	19.2436	18.8961		4	3.6	actin cytoskeleton organization;actin filament-based process;biological regulation;cellular component organization;cellular component organization at cellular level;cellular component organization or biogenesis;cellular component organization or biogenesis at cellular level;cellular process;cytoskeleton organization;organelle organization;regulation of anatomical structure morphogenesis;regulatio…		cell part;cytoplasm;cytoplasmic part;endoplasmic reticulum;intracellular membrane-bounded organelle;intracellular organelle;intracellular part;membrane-bounded organelle;nucleus;organelle;perinuclear region of cytoplasm		-1.30223	20.2569	-1.83572	0.111827	0.311142	-5.19197	-1.70796	20.0946	-2.45503	0.0420299	0.11404	-4.30214	-0.40573	19.2727	-0.93592	0.388505	0.660123	-6.0614	NPC.iPS	Neu.iPS	Neu.NPC
Q2M2I8;E9PG46;A0A087WUK0;Q2M2I8-2	AP2-associated protein kinase 1	AAK1							21.4527	20.5391	21.0894	3	5.1	biological regulation;cellular component organization;cellular component organization or biogenesis;cellular macromolecule metabolic process;cellular membrane organization;cellular metabolic process;cellular process;cellular protein metabolic process;endocytosis;establishment of localization;macromolecule metabolic process;macromolecule modification;membrane invagination;membrane organization;met…	adenyl nucleotide binding;adenyl ribonucleotide binding;AP-2 adaptor complex binding;ATP binding;binding;catalytic activity;kinase activity;Notch binding;nucleotide binding;phosphotransferase activity, alcohol group as acceptor;protein binding;protein complex binding;protein kinase activity;protein serine/threonine kinase activity;purine nucleotide binding;purine ribonucleoside triphosphate bindi…	axon part;cell leading edge;cell part;cell projection part;clathrin-coated vesicle;coated pit;coated vesicle;cytoplasmic membrane-bounded vesicle;cytoplasmic part;cytoplasmic vesicle;extrinsic to membrane;extrinsic to plasma membrane;intracellular membrane-bounded organelle;intracellular organelle;intracellular part;membrane part;membrane-bounded organelle;membrane-bounded vesicle;organelle;plasm…																				NPC.iPS	Neu.iPS	Neu.NPC
B0QZ18;Q99829;F2Z2V0;A6PVH9	Copine-1	CPNE1	22.4483	22.4144		21.658	21.5982	23.1601	22.1871	22.1127	21.2002	5	15.3	biological regulation;biosynthetic process;cellular biosynthetic process;cellular lipid metabolic process;cellular metabolic process;cellular process;cellular response to calcium ion;cellular response to chemical stimulus;cellular response to inorganic substance;cellular response to metal ion;cellular response to stimulus;establishment of localization;glycerolipid biosynthetic process;glycerolipi…	binding;calcium ion binding;calcium-dependent phospholipid binding;catalytic activity;cation binding;endopeptidase activity;hydrolase activity;identical protein binding;ion binding;lipid binding;metal ion binding;NF-kappaB binding;peptidase activity;peptidase activity, acting on L-amino acid peptides;phosphatidylserine binding;phospholipid binding;protein binding;protein dimerization activity;pro…	cell part;cytoplasm;cytoplasmic part;cytosol;extracellular membrane-bounded organelle;extracellular organelle;extracellular region part;extracellular vesicular exosome;intracellular membrane-bounded organelle;intracellular organelle;intracellular part;membrane;membrane-bounded organelle;membrane-bounded vesicle;nucleus;organelle;plasma membrane;vesicle		-0.292582	22.2558	-0.535673	0.60984	0.77673	-6.5726	-0.597998	22.0726	-1.38257	0.207152	0.345302	-5.80827	-0.305417	21.9861	-0.578413	0.579915	0.788965	-6.54732	NPC.iPS	Neu.iPS	Neu.NPC
Q2NL82;I3L1Q5	Pre-rRNA-processing protein TSR1 homolog	TSR1	22.4269	22.5315	22.3261	21.5414				21.4376		4	8	cellular component assembly;cellular component assembly at cellular level;cellular component biogenesis;cellular component biogenesis at cellular level;cellular component organization;cellular component organization at cellular level;cellular component organization or biogenesis;cellular component organization or biogenesis at cellular level;cellular macromolecular complex assembly;cellular macro…		cell part;intracellular membrane-bounded organelle;intracellular non-membrane-bounded organelle;intracellular organelle;intracellular organelle part;intracellular part;membrane-bounded organelle;non-membrane-bounded organelle;nuclear part;nucleolus;nucleus;organelle;organelle part		-0.886737	22.2065	-2.01978	0.0936272	0.282682	-4.74898	-0.990597	22.1805	-2.09122	0.0786484	0.176639	-4.65409	-0.10386	21.4895	-0.139688	0.89655	0.953047	-6.18262	NPC.iPS	Neu.iPS	Neu.NPC
Q2Q1W2	E3 ubiquitin-protein ligase TRIM71	TRIM71	26.5021	26.4978	27.3342		25.7724			26.7969	26.4367	10	15.9	3'-UTR-mediated mRNA destabilization;anatomical structure development;anatomical structure formation involved in morphogenesis;biological regulation;cell cycle process;cell proliferation;cell surface receptor linked signaling pathway;cellular macromolecule metabolic process;cellular metabolic process;cellular nitrogen compound metabolic process;cellular process;cellular protein metabolic process;…	acid-amino acid ligase activity;binding;catalytic activity;cation binding;ion binding;ligase activity;ligase activity, forming carbon-nitrogen bonds;metal ion binding;miRNA binding;nucleic acid binding;RNA binding;small conjugating protein ligase activity;transition metal ion binding;translation regulator activity;translation repressor activity;ubiquitin-protein ligase activity;zinc ion binding	cell part;cytoplasmic mRNA processing body;cytoplasmic part;intracellular non-membrane-bounded organelle;intracellular organelle;intracellular part;macromolecular complex;non-membrane-bounded organelle;organelle;ribonucleoprotein complex;RNA granule		-1.00564	26.5266	-1.83962	0.119265	0.323956	-4.98568	-0.161212	26.7135	-0.381544	0.713539	0.808241	-6.67828	0.844425	26.3353	1.43927	0.215709	0.485189	-5.33088	NPC.iPS	Neu.iPS	Neu.NPC
A0A087X1B7;X6R700;Q9Y3Y2-4;Q9Y3Y2;Q9Y3Y2-3;Q5T7Y7	Chromatin target of PRMT1 protein	CHTOP	20.8561	21.8012				21.1782	21.1341	20.4703	21.4917	2	38.2	biological regulation;biosynthetic process;cellular biosynthetic process;cellular macromolecule biosynthetic process;cellular macromolecule metabolic process;cellular metabolic process;cellular nitrogen compound metabolic process;cellular process;establishment of localization;establishment of localization in cell;establishment of RNA localization;intracellular transport;macromolecule biosynthetic…		cell part;intracellular membrane-bounded organelle;intracellular non-membrane-bounded organelle;intracellular organelle;intracellular organelle part;intracellular part;macromolecular complex;membrane-bounded organelle;non-membrane-bounded organelle;nuclear body;nuclear part;nuclear speck;nucleolus;nucleoplasm;nucleoplasm part;organelle;organelle part;protein complex;transcription export complex		-0.15042	21.2785	-0.236622	0.823195	0.907811	-6.41069	-0.2966	21.1507	-0.618638	0.554745	0.69181	-6.55008	-0.14618	21.0686	-0.242031	0.817512	0.910981	-6.35703	NPC.iPS	Neu.iPS	Neu.NPC
Q2TAY7;Q2TAY7-2	WD40 repeat-containing protein SMU1;WD40 repeat-containing protein SMU1, N-terminally processed	SMU1	23.0701	23.5274	23.9818	22.3856	21.5041	22.9529	22.0326	22.9861	22.1175	7	17.7			cell part;cytoplasm;intracellular membrane-bounded organelle;intracellular organelle;intracellular part;membrane-bounded organelle;nucleus;organelle		-1.2456	22.9037	-2.78812	0.0249588	0.139284	-3.8641	-1.14772	22.9526	-2.85976	0.0201625	0.0681864	-3.72297	0.09788	22.3298	0.204005	0.84377	0.928595	-6.70695	NPC.iPS	Neu.iPS	Neu.NPC
Q32P28-4;Q32P28;Q32P28-3	Prolyl 3-hydroxylase 1	LEPRE1	22.2186	20.9749	22.8974		21.1436	21.9039	20.0269	21.2265	20.6811	9	14.9	anatomical structure development;biological regulation;bone development;cell growth;cellular component organization;cellular component organization at cellular level;cellular component organization or biogenesis;cellular component organization or biogenesis at cellular level;cellular macromolecule metabolic process;cellular metabolic process;cellular process;cellular protein metabolic process;cha…	binding;carboxylic acid binding;catalytic activity;cation binding;ion binding;iron ion binding;L-ascorbic acid binding;metal ion binding;oxidoreductase activity;oxidoreductase activity, acting on paired donors, with incorporation or reduction of molecular oxygen;oxidoreductase activity, acting on paired donors, with incorporation or reduction of molecular oxygen, 2-oxoglutarate as one donor, and …	cell part;cytoplasmic part;endoplasmic reticulum;endoplasmic reticulum lumen;endoplasmic reticulum part;extracellular matrix;extracellular membrane-bounded organelle;extracellular organelle;extracellular region part;extracellular vesicular exosome;intracellular membrane-bounded organelle;intracellular organelle;intracellular organelle lumen;intracellular organelle part;intracellular part;macromol…		-0.506508	21.8277	-0.824463	0.438598	0.653703	-6.36491	-1.38544	21.3376	-2.56285	0.0322627	0.0958153	-4.19342	-0.878928	20.9964	-1.74548	0.127634	0.378086	-5.20924	NPC.iPS	Neu.iPS	Neu.NPC
Q3KQU3-4;Q3KQU3;Q3KQU3-2	MAP7 domain-containing protein 1	MAP7D1			21.5317	21.7259	22.7916	22.2614	22.5469	22.4108	23.4565	8	11.5	cellular component organization;cellular component organization at cellular level;cellular component organization or biogenesis;cellular component organization or biogenesis at cellular level;cellular process;cytoskeleton organization;microtubule cytoskeleton organization;microtubule-based process;organelle organization	structural molecule activity	cell part;cytoplasm;cytoskeletal part;intracellular non-membrane-bounded organelle;intracellular organelle;intracellular organelle part;intracellular part;macromolecular complex;microtubule;non-membrane-bounded organelle;organelle;organelle part;protein complex;spindle		0.727937	22.0777	1.27938	0.251509	0.488747	-5.6762	1.27304	22.4865	2.13683	0.0737136	0.168457	-4.59078	0.545107	22.5322	1.23784	0.253079	0.526038	-5.95221	NPC.iPS	Neu.iPS	Neu.NPC
Q3KQV9-2;Q3KQV9	UDP-N-acetylhexosamine pyrophosphorylase-like protein 1	UAP1L1		17.0429								2	6.2		catalytic activity;nucleotidyltransferase activity;transferase activity;transferase activity, transferring phosphorus-containing groups;uridylyltransferase activity		Amino sugar and nucleotide sugar metabolism																			NPC.iPS	Neu.iPS	Neu.NPC
Q3SXM5;Q3SXM5-2;H3BQI7;H3BT52	Inactive hydroxysteroid dehydrogenase-like protein 1	HSDL1	21.8598		21.4975	21.2716		22.6888	25.9652	24.0993	23.1013	6	22.4		catalytic activity;oxidoreductase activity	cell part;cytoplasmic part;intracellular membrane-bounded organelle;intracellular organelle;intracellular part;membrane-bounded organelle;mitochondrion;organelle		0.301585	21.8294	0.522632	0.621368	0.785888	-6.48775	2.70996	23.3046	3.48958	0.00930234	0.0398171	-2.7649	2.40837	23.4252	2.70297	0.032716	0.174708	-3.86749	NPC.iPS	Neu.iPS	Neu.NPC
Q3ZAQ7-2			22.8635	22.6558	22.4507	18.8894		23.1546	23.2257		24.0637	1	7.7	#N/A	#N/A	#N/A	#N/A	-1.63464	22.0028	-1.45351	0.192153	0.425298	-5.69371	0.98806	23.0519	2.40993	0.0449812	0.119799	-4.36967	2.6227	22.3334	1.90722	0.109441	0.343946	-4.92536	NPC.iPS	Neu.iPS	Neu.NPC
Q3ZCM7;A0A075B736;Q5SQY0	Tubulin beta-8 chain	TUBB8	25.3852	25.4598	25.4682	25.3939	25.3854		26.214	26.0438	25.7335	2	7.4	cellular component assembly;cellular component assembly at cellular level;cellular component organization;cellular component organization at cellular level;cellular component organization or biogenesis;cellular component organization or biogenesis at cellular level;cellular macromolecular complex assembly;cellular macromolecular complex subunit organization;cellular process;cellular protein compl…	binding;catalytic activity;GTP binding;GTPase activity;guanyl nucleotide binding;guanyl ribonucleotide binding;hydrolase activity;hydrolase activity, acting on acid anhydrides;hydrolase activity, acting on acid anhydrides, in phosphorus-containing anhydrides;nucleoside-triphosphatase activity;nucleotide binding;purine nucleotide binding;purine ribonucleoside triphosphate binding;purine ribonucleo…	cell part;cytoplasm;cytoskeletal part;extracellular membrane-bounded organelle;extracellular organelle;extracellular region part;extracellular vesicular exosome;intracellular organelle part;intracellular part;macromolecular complex;membrane-bounded organelle;membrane-bounded vesicle;microtubule;organelle;organelle part;protein complex;vesicle	Gap junction;Pathogenic Escherichia coli infection;Phagosome	-0.0481283	25.4185	-0.152217	0.883587	0.941986	-6.71898	0.559347	25.7174	1.82895	0.103087	0.213979	-5.31372	0.607475	25.7541	1.62717	0.150952	0.409553	-5.36541	NPC.iPS	Neu.iPS	Neu.NPC
Q3ZCQ8;Q3ZCQ8-2;M0R0C3;M0R2F8;Q3ZCQ8-3	Mitochondrial import inner membrane translocase subunit TIM50	TIMM50	21.821	23.2299	22.0279	21.5009		21.7565	19.647	20.8979	20.1032	5	16.4	apoptotic mitochondrial changes;cellular component organization;cellular component organization at cellular level;cellular component organization or biogenesis;cellular component organization or biogenesis at cellular level;cellular macromolecule metabolic process;cellular membrane organization;cellular metabolic process;cellular process;cellular protein metabolic process;dephosphorylation;establ…	binding;catalytic activity;cytokine receptor binding;growth factor receptor binding;hydrolase activity;hydrolase activity, acting on ester bonds;interleukin-2 receptor binding;nucleic acid binding;phosphatase activity;phosphoprotein phosphatase activity;phosphoric ester hydrolase activity;protein binding;protein serine/threonine phosphatase activity;protein tyrosine phosphatase activity;receptor …	cell part;cytoplasmic part;integral to membrane;intracellular membrane-bounded organelle;intracellular organelle;intracellular organelle part;intracellular part;intrinsic to membrane;macromolecular complex;membrane;membrane part;membrane-bounded organelle;mitochondrial inner membrane;mitochondrial inner membrane presequence translocase complex;mitochondrial membrane;mitochondrial membrane part;mi…		-0.730882	22.0672	-1.46027	0.190352	0.423456	-5.68528	-2.14355	21.2878	-4.38018	0.00209668	0.0149538	-1.39559	-1.41267	20.7811	-2.93937	0.0236212	0.14415	-3.53457	NPC.iPS	Neu.iPS	Neu.NPC
B0YIW2;P02656	Apolipoprotein C-III	APOC3		20.5191					22.4592	21.91	22.4232	1	13.7	acylglycerol catabolic process;acylglycerol metabolic process;alcohol metabolic process;biological regulation;carbohydrate homeostasis;catabolic process;cell surface receptor linked signaling pathway;cellular catabolic process;cellular chemical homeostasis;cellular component assembly;cellular component organization;cellular component organization or biogenesis;cellular glucose homeostasis;cellula…	binding;cholesterol binding;enzyme inhibitor activity;enzyme regulator activity;high-density lipoprotein particle receptor binding;lipase inhibitor activity;lipid binding;lipoprotein particle receptor binding;phospholipid binding;protein binding;receptor binding;steroid binding;sterol binding	cell part;chylomicron;cytoplasmic part;early endosome;endosome;extracellular membrane-bounded organelle;extracellular organelle;extracellular region;extracellular region part;extracellular space;extracellular vesicular exosome;high-density lipoprotein particle;intermediate-density lipoprotein particle;intracellular membrane-bounded organelle;intracellular organelle;intracellular part;macromolecul…	PPAR signaling pathway							1.74501	21.8279	3.42634	0.0127269	0.0490972	-2.81473							NPC.iPS	Neu.iPS	Neu.NPC
Q4G0F5	Vacuolar protein sorting-associated protein 26B	VPS26B		19.0801				20.8036	21.8219	21.3669	22.2188	3	10.7	cellular process;endosome transport;establishment of localization;establishment of localization in cell;establishment of protein localization;intracellular protein transport;intracellular transport;protein transport;retrograde transport, endosome to Golgi;transport;vesicle-mediated transport	protein transporter activity;substrate-specific transporter activity;transporter activity	cell part;cytoplasmic part;cytosol;early endosome;endosome;intracellular membrane-bounded organelle;intracellular organelle;intracellular part;late endosome;macromolecular complex;membrane part;membrane-bounded organelle;organelle;protein complex;retromer complex		1.72347	19.9418	2.59986	0.0674212	0.234221	-4.01457	2.72242	21.1219	5.00524	0.00203568	0.0148731	-0.932945	0.998953	21.5528	1.75852	0.133559	0.387607	-4.99048	NPC.iPS	Neu.iPS	Neu.NPC
P07195;A8MW50	L-lactate dehydrogenase B chain;L-lactate dehydrogenase	LDHB	29.4039	29.1872	29.9481	29.2841	28.0459	28.9374	28.409	27.775	27.6699	22	64.1	carbohydrate metabolic process;carboxylic acid metabolic process;cellular ketone metabolic process;cellular metabolic process;cellular nitrogen compound metabolic process;cellular process;coenzyme metabolic process;cofactor metabolic process;heterocycle metabolic process;lactate metabolic process;metabolic process;monocarboxylic acid metabolic process;NAD metabolic process;nicotinamide nucleotide…	binding;catalytic activity;coenzyme binding;cofactor binding;lactate dehydrogenase activity;L-lactate dehydrogenase activity;NAD binding;nucleotide binding;oxidoreductase activity;oxidoreductase activity, acting on CH-OH group of donors;oxidoreductase activity, acting on the CH-OH group of donors, NAD or NADP as acceptor	cell part;cytoplasm;cytoplasmic part;cytosol;extracellular membrane-bounded organelle;extracellular organelle;extracellular region part;extracellular vesicular exosome;intracellular membrane-bounded organelle;intracellular organelle;intracellular part;membrane;membrane part;membrane raft;membrane-bounded organelle;membrane-bounded vesicle;mitochondrion;organelle;vesicle	Cysteine and methionine metabolism;Glycolysis / Gluconeogenesis;Propanoate metabolism;Pyruvate metabolism	-0.75722	29.1345	-1.84726	0.104034	0.299512	-5.26942	-1.56175	28.7322	-4.27263	0.00243558	0.0161478	-1.55135	-0.804533	28.3536	-1.86072	0.102241	0.332107	-5.14426	NPC.iPS	Neu.iPS	Neu.NPC
Q4J6C6-4;Q4J6C6;Q4J6C6-2;Q4J6C6-3	Prolyl endopeptidase-like	PREPL	22.1198	20.0975	21.9222	23.0017	21.9567	23.2017	23.9529	24.0032	23.8836	9	24.3		catalytic activity;endopeptidase activity;exopeptidase activity;hydrolase activity;peptidase activity;peptidase activity, acting on L-amino acid peptides;serine hydrolase activity;serine-type endopeptidase activity;serine-type exopeptidase activity;serine-type peptidase activity	cell part;cytoplasmic part;cytoskeleton;cytosol;Golgi apparatus;intracellular membrane-bounded organelle;intracellular non-membrane-bounded organelle;intracellular organelle;intracellular part;membrane-bounded organelle;non-membrane-bounded organelle;organelle		1.34019	22.0499	2.21261	0.059734	0.220488	-4.73598	2.56671	22.6632	4.83384	0.00113544	0.0100942	-0.757213	1.22652	23.3333	3.00936	0.0181155	0.127731	-3.43514	NPC.iPS	Neu.iPS	Neu.NPC
Q52LJ0;Q52LJ0-2	Protein FAM98B	FAM98B	23.2613	23.0032	23.7902	23.6278	23.1595	24.1178	23.5295	24.2477	23.7518	6	32.7			cell part;cytoplasm;intracellular membrane-bounded organelle;intracellular organelle;intracellular part;macromolecular complex;membrane-bounded organelle;nucleus;organelle;protein complex;tRNA-splicing ligase complex		0.283487	23.4933	0.763509	0.468298	0.677353	-6.52808	0.491437	23.5973	1.35861	0.209682	0.349024	-5.94658	0.20795	23.739	0.535351	0.607893	0.804549	-6.57304	NPC.iPS	Neu.iPS	Neu.NPC
Q53GQ0	Very-long-chain 3-oxoacyl-CoA reductase	HSD17B12	23.8133	23.4428	24.1416	22.9135	21.9865	23.4595	24.757	24.5142	21.8177	5	21.2	acyl-CoA biosynthetic process;acyl-CoA metabolic process;acylglycerol biosynthetic process;acylglycerol metabolic process;biological regulation;biosynthetic process;carboxylic acid biosynthetic process;carboxylic acid metabolic process;cellular biosynthetic process;cellular component organization;cellular component organization at cellular level;cellular component organization or biogenesis;cellu…	binding;carbohydrate binding;catalytic activity;estradiol 17-beta-dehydrogenase activity;glycosaminoglycan binding;heparin binding;oxidoreductase activity;oxidoreductase activity, acting on CH-OH group of donors;oxidoreductase activity, acting on the CH-OH group of donors, NAD or NADP as acceptor;pattern binding;polysaccharide binding;steroid dehydrogenase activity;steroid dehydrogenase activity,…	cell part;cytoplasmic part;endoplasmic reticulum membrane;endoplasmic reticulum part;extracellular matrix;extracellular region part;integral to membrane;intracellular organelle part;intracellular part;intrinsic to membrane;membrane;membrane part;organelle membrane;organelle part	Biosynthesis of unsaturated fatty acids;Steroid hormone biosynthesis	-1.01274	23.2929	-2.3338	0.0496554	0.198911	-4.55414	-0.10293	23.7478	-0.141876	0.890527	0.928506	-6.85815	0.90981	23.2414	1.12225	0.296356	0.571775	-6.0804	NPC.iPS	Neu.iPS	Neu.NPC
Q56VL3	OCIA domain-containing protein 2	OCIAD2	19.1284	17.4422								4	26			cell part;cytoplasmic part;endosome;intracellular membrane-bounded organelle;intracellular organelle;intracellular organelle part;intracellular part;membrane;membrane-bounded organelle;mitochondrial inner membrane;mitochondrial membrane;mitochondrial part;organelle;organelle inner membrane;organelle membrane;organelle part																				NPC.iPS	Neu.iPS	Neu.NPC
Q58FF6	Putative heat shock protein HSP 90-beta 4	HSP90AB4P	23.1947	22.5867		22.4586	23.0386	23.9583	20.2416	21.5952	21.5821	2	6.1	cellular macromolecule metabolic process;cellular metabolic process;cellular process;cellular protein metabolic process;macromolecule metabolic process;metabolic process;primary metabolic process;protein folding;protein metabolic process;response to stimulus;response to stress	adenyl nucleotide binding;adenyl ribonucleotide binding;ATP binding;binding;nucleotide binding;purine nucleotide binding;purine ribonucleoside triphosphate binding;purine ribonucleotide binding;ribonucleotide binding	cell part;cytoplasm;intracellular part		0.261123	23.0474	0.504338	0.630503	0.791646	-6.59038	-1.75106	21.8401	-3.33179	0.0116143	0.0465168	-2.99429	-2.01218	22.1457	-3.70424	0.00671863	0.0744225	-2.4157	NPC.iPS	Neu.iPS	Neu.NPC
Q58FF8	Putative heat shock protein HSP 90-beta 2	HSP90AB2P	26.9072	27.0281	24.6097	25.5787	25.431	26.3363	26.0939	26.1702	25.5167	2	4.5	cellular macromolecule metabolic process;cellular metabolic process;cellular process;cellular protein metabolic process;macromolecule metabolic process;metabolic process;primary metabolic process;protein folding;protein metabolic process;response to stimulus;response to stress	adenyl nucleotide binding;adenyl ribonucleotide binding;ATP binding;binding;nucleotide binding;purine nucleotide binding;purine ribonucleoside triphosphate binding;purine ribonucleotide binding;ribonucleotide binding	cell part;cytoplasm;extracellular membrane-bounded organelle;extracellular organelle;extracellular region part;extracellular vesicular exosome;intracellular part;membrane-bounded organelle;membrane-bounded vesicle;organelle;vesicle		-0.399713	25.9818	-0.604041	0.563485	0.74259	-6.64288	-0.254773	26.0543	-0.403196	0.696888	0.797074	-6.78014	0.14494	25.8544	0.37341	0.719165	0.86161	-6.65296	NPC.iPS	Neu.iPS	Neu.NPC
Q5BKZ1	DBIRD complex subunit ZNF326	ZNF326	23.306	23.5424	22.7526	22.5101	23.6144	22.629	22.3601	21.2835	22.4798	4	7.6	biological regulation;biosynthetic process;cellular biosynthetic process;cellular macromolecule biosynthetic process;cellular macromolecule metabolic process;cellular metabolic process;cellular nitrogen compound metabolic process;cellular process;macromolecule biosynthetic process;macromolecule metabolic process;metabolic process;mRNA metabolic process;mRNA processing;nitrogen compound metabolic …	basal RNA polymerase II transcription machinery binding;basal transcription machinery binding;binding;cation binding;DNA binding;enzyme binding;ion binding;metal ion binding;nucleic acid binding;protein binding;RNA polymerase binding;RNA polymerase core enzyme binding;RNA polymerase II core binding;transition metal ion binding;zinc ion binding	cell part;intracellular membrane-bounded organelle;intracellular organelle;intracellular organelle part;intracellular part;membrane-bounded organelle;nuclear matrix;nuclear part;nucleoplasm;organelle;organelle part		-0.28251	23.0591	-0.700293	0.504705	0.700401	-6.5764	-1.1592	22.6207	-2.74075	0.0243292	0.078543	-3.91182	-0.876693	22.4795	-1.83433	0.106378	0.338999	-5.18148	NPC.iPS	Neu.iPS	Neu.NPC
Q5EBL4-2;Q5EBL4	RILP-like protein 1	RILPL1					20.3511	20.1405	19.0678	18.8862	19.4146	1	3	anatomical structure morphogenesis;cell morphogenesis;cell morphogenesis involved in differentiation;cellular component morphogenesis;cellular component organization;cellular component organization or biogenesis;cellular developmental process;cellular process;developmental process;epithelial cell morphogenesis;establishment of localization;establishment of localization in cell;establishment of pr…		cell part;cell projection;centrosome;cilium;cytoplasm;cytoplasmic part;cytoskeletal part;cytosol;intracellular non-membrane-bounded organelle;intracellular organelle;intracellular organelle part;intracellular part;membrane;microtubule organizing center;non-membrane-bounded organelle;nuclear part;nucleoplasm;organelle;organelle part;plasma membrane;primary cilium														-1.12294	19.572	-2.94426	0.0234644	0.14415	-3.52774	NPC.iPS	Neu.iPS	Neu.NPC
Q5H909;Q9UNF1-2;Q9UNF1;Q5H907	Melanoma-associated antigen D2	MAGED2	22.9881	22.8575	23.0129	20.9585		21.9595	21.0845			6	15.3			cell part;membrane		-1.49381	22.3553	-3.6798	0.0088055	0.0803758	-2.60555	-1.86835	22.4857	-3.95743	0.00659	0.0310577	-2.13685	-0.374535	21.3342	-0.535417	0.617695	0.80905	-6.16895	NPC.iPS	Neu.iPS	Neu.NPC
B1AJY5;B1AJY7;O75832	26S proteasome non-ATPase regulatory subunit 10	PSMD10		20.6595					23.4634	21.8123		2	27.6	activation of immune response;activation of innate immune response;anaphase-promoting complex-dependent proteasomal ubiquitin-dependent protein catabolic process;antigen processing and presentation;antigen processing and presentation of exogenous antigen;antigen processing and presentation of exogenous peptide antigen;antigen processing and presentation of exogenous peptide antigen via MHC class …	binding;protein binding;transcription factor binding	cell part;cytoplasm;cytoplasmic part;cytoskeleton;cytosol;intermediate filament cytoskeleton;intracellular membrane-bounded organelle;intracellular non-membrane-bounded organelle;intracellular organelle;intracellular organelle part;intracellular part;macromolecular complex;membrane-bounded organelle;non-membrane-bounded organelle;nuclear part;nucleoplasm;nucleus;organelle;organelle part;proteasom…								1.97833	21.9784	2.41163	0.0571502	0.139572	-4.21218							NPC.iPS	Neu.iPS	Neu.NPC
P07196;A0A087X0W2	Neurofilament light polypeptide	NEFL		20.9422		20.9117	21.706	18.8655	22.4534	22.8716	24.2534	19	38.1	anatomical structure morphogenesis;anterograde axon cargo transport;axon cargo transport;axon regeneration;axon transport of mitochondrion;axonogenesis;biological regulation;cell communication;cell part morphogenesis;cell projection morphogenesis;cell projection organization;cell-cell signaling;cellular component assembly;cellular component assembly at cellular level;cellular component morphogene…	binding;binding, bridging;identical protein binding;protein binding;protein binding, bridging;protein C-terminus binding;structural constituent of cytoskeleton;structural molecule activity	axon;axon part;cell part;cell projection;cell projection part;cytoplasm;cytoplasmic part;cytoskeletal part;cytosol;growth cone;intermediate filament;intracellular organelle part;intracellular part;macromolecular complex;neurofilament;neuron projection;organelle part;protein complex;site of polarized growth	Amyotrophic lateral sclerosis (ALS)	-0.447797	20.6064	-0.405947	0.699924	0.838414	-6.40763	2.25055	22.6301	2.92879	0.024489	0.0788419	-3.48566	2.69834	21.8436	3.41295	0.0101036	0.0933097	-2.83681	NPC.iPS	Neu.iPS	Neu.NPC
Q5HYI5;Q8WUD1;Q8WUD1-2	Ras-related protein Rab-2B	DKFZp313C1541;RAB2B				21.1392			22.9859	21.8104	20.936	2	13.4	biological regulation;cellular process;cellular response to stimulus;establishment of localization;establishment of localization in cell;establishment of protein localization;intracellular protein transport;intracellular signal transduction;intracellular transport;metabolic process;positive regulation of biological process;positive regulation of cellular process;positive regulation of exocytosis;…	binding;catalytic activity;GTP binding;GTPase activity;guanyl nucleotide binding;guanyl ribonucleotide binding;hydrolase activity;hydrolase activity, acting on acid anhydrides;hydrolase activity, acting on acid anhydrides, in phosphorus-containing anhydrides;nucleoside-triphosphatase activity;nucleotide binding;purine nucleotide binding;purine ribonucleoside triphosphate binding;purine ribonucleo…	cell part;cytoplasmic part;endoplasmic reticulum membrane;endoplasmic reticulum part;extracellular membrane-bounded organelle;extracellular organelle;extracellular region part;extracellular vesicular exosome;Golgi apparatus part;Golgi membrane;intracellular organelle part;intracellular part;membrane;membrane part;membrane-bounded organelle;membrane-bounded vesicle;organelle;organelle membrane;org…														0.771603	21.7179	0.89281	0.409264	0.675057	-5.96366	NPC.iPS	Neu.iPS	Neu.NPC
Q5IJ48-3;Q5IJ48;Q5IJ48-2	Protein crumbs homolog 2	CRB2				21.5846	21.4998	21.5767		20.3221		3	4	anatomical structure development;anatomical structure formation involved in morphogenesis;anterior/posterior pattern specification;biological regulation;cardiovascular system development;cellular process;developmental process;establishment or maintenance of apical/basal cell polarity;establishment or maintenance of bipolar cell polarity;establishment or maintenance of cell polarity;establishment …	binding;calcium ion binding;cation binding;enzyme binding;ion binding;metal ion binding;protein binding	cell part;extracellular membrane-bounded organelle;extracellular organelle;extracellular region part;extracellular vesicular exosome;integral to membrane;intrinsic to membrane;macromolecular complex;membrane;membrane part;membrane raft;membrane-bounded organelle;membrane-bounded vesicle;organelle;plasma membrane;protein complex;vesicle														-1.23155	21.2458	-2.53621	0.0477691	0.217397	-3.97591	NPC.iPS	Neu.iPS	Neu.NPC
Q5JQQ4;Q9BVM2	Protein DPCD	DPCD	19.0587						20.3776		20.2332	2	6.5	anatomical structure development;cell motility;cellular component movement;cellular process;cilium movement;determination of bilateral symmetry;determination of left/right symmetry;developmental process;epithelial cilium movement;gamete generation;lateral ventricle development;left/right pattern formation;locomotion;male gamete generation;microtubule-based movement;microtubule-based process;multi…		cell part;intracellular membrane-bounded organelle;intracellular organelle;intracellular part;membrane-bounded organelle;nucleus;organelle								1.24668	19.8898	2.29021	0.0668655	0.155533	-4.37144							NPC.iPS	Neu.iPS	Neu.NPC
Q5JR01;A6PW80		EEF1A1	23.318	23.5672	25.5276	23.6809	23.1246	22.9175	21.184		19.5686	1	7.6		binding;catalytic activity;GTP binding;GTPase activity;guanyl nucleotide binding;guanyl ribonucleotide binding;hydrolase activity;hydrolase activity, acting on acid anhydrides;hydrolase activity, acting on acid anhydrides, in phosphorus-containing anhydrides;nucleoside-triphosphatase activity;nucleotide binding;purine nucleotide binding;purine ribonucleoside triphosphate binding;purine ribonucleo…			-0.896563	23.6893	-1.50558	0.172731	0.401574	-5.73422	-3.76127	22.6331	-4.86995	0.00155732	0.0121834	-0.904484	-2.8647	22.0951	-4.97818	0.0019831	0.0402563	-0.966365	NPC.iPS	Neu.iPS	Neu.NPC
Q5JTH9-2;Q5JTH9-3;Q5JTH9	RRP12-like protein	RRP12	23.8036	23.2733	23.5789	20.5931		21.716	20.9188	21.488		8	7.5			cell part;integral to membrane;intracellular non-membrane-bounded organelle;intracellular organelle;intracellular organelle part;intracellular part;intrinsic to membrane;membrane;membrane part;non-membrane-bounded organelle;nuclear membrane;nuclear part;nucleolus;organelle;organelle membrane;organelle part		-2.39734	22.593	-5.39518	0.00125038	0.0283215	-0.55617	-2.34852	22.6125	-6.00149	0.00044045	0.00577506	0.405528	0.04881	21.179	0.086298	0.93428	0.970119	-6.52658	NPC.iPS	Neu.iPS	Neu.NPC
Q5JUA9;Q9H269-2;Q9H269;Q5JUB0;Q5JUA8	Vacuolar protein sorting-associated protein 16 homolog	VPS16			23.7615		23.672	22.4488		24.0464		2	12	biological regulation;cellular component organization;cellular component organization at cellular level;cellular component organization or biogenesis;cellular component organization or biogenesis at cellular level;cellular process;endosome transport;entry into cell of other organism involved in symbiotic interaction;entry into host;entry into host cell;entry into other organism involved in symbio…	actin binding;binding;cytoskeletal protein binding;protein binding	actin filament;axon;cell body;cell part;cell projection;cytoplasm;cytoplasmic part;cytoskeletal part;early endosome;endosomal part;endosome;endosome membrane;HOPS complex;intracellular membrane-bounded organelle;intracellular organelle;intracellular organelle part;intracellular part;late endosome;late endosome membrane;lysosomal membrane;lysosome;lytic vacuole;macromolecular complex;membrane;memb…		-0.70113	23.2941	-0.988422	0.372394	0.601515	-5.91887	0.28491	23.904	0.411061	0.700324	0.797456	-6.23188	0.98604	23.3891	1.3043	0.254737	0.527983	-5.48351	NPC.iPS	Neu.iPS	Neu.NPC
Q5JVS0-2;Q5JVS0	Intracellular hyaluronan-binding protein 4	HABP4				20.0431	19.6769	19.9787	20.3012		20.2989	1	5.2	biological regulation;biosynthetic process;blood coagulation;cell activation;cellular biosynthetic process;cellular macromolecule biosynthetic process;cellular macromolecule metabolic process;cellular metabolic process;cellular nitrogen compound metabolic process;cellular process;cellular response to abiotic stimulus;cellular response to external stimulus;cellular response to mechanical stimulus;…		cell part;contractile fiber part;cytoplasm;cytoplasmic part;cytosol;extracellular region;intracellular membrane-bounded organelle;intracellular organelle;intracellular organelle part;intracellular part;membrane-bounded organelle;nuclear part;nucleoplasm;nucleus;organelle;organelle part;sarcomere														0.400492	20.0598	1.09423	0.312688	0.586972	-5.99834	NPC.iPS	Neu.iPS	Neu.NPC
Q5JX83;Q96MM6	Heat shock 70 kDa protein 12B	HSPA12B		22.0704	22.2709	22.5937	22.6567	21.4098	21.1459	21.013	21.9746	2	3.2		adenyl nucleotide binding;adenyl ribonucleotide binding;ATP binding;binding;nucleotide binding;purine nucleotide binding;purine ribonucleoside triphosphate binding;purine ribonucleotide binding;ribonucleotide binding			0.0494233	22.2003	0.103677	0.920521	0.960125	-6.72602	-0.792803	21.6949	-1.85633	0.103567	0.214159	-5.17919	-0.842227	21.7989	-1.78779	0.114065	0.351082	-5.24662	NPC.iPS	Neu.iPS	Neu.NPC
Q5JY65;Q9BZJ0-2;Q9BZJ0-3;Q9BZJ0	Crooked neck-like protein 1	CRNKL1		20.206						20.0613		2	3.1	biological regulation;cellular component assembly;cellular component assembly at cellular level;cellular component organization;cellular component organization at cellular level;cellular component organization or biogenesis;cellular component organization or biogenesis at cellular level;cellular macromolecular complex assembly;cellular macromolecular complex subunit organization;cellular macromol…	binding;nucleic acid binding;RNA binding	catalytic step 2 spliceosome;cell part;cytoplasm;intracellular membrane-bounded organelle;intracellular organelle;intracellular organelle part;intracellular part;macromolecular complex;membrane-bounded organelle;nuclear body;nuclear part;nuclear speck;nucleoplasm part;nucleus;organelle;organelle part;ribonucleoprotein complex;spliceosomal complex	Spliceosome							-0.14467	20.1336	-0.208726	0.844	0.903269	-6.30466							NPC.iPS	Neu.iPS	Neu.NPC
Q5LJA5;Q5LJA9;Q9Y5K5-2;Q9Y5K5-4;Q9Y5K5-3;Q9Y5K5;Q5LJB0	Ubiquitin carboxyl-terminal hydrolase;Ubiquitin carboxyl-terminal hydrolase isozyme L5	UCHL5			20.472				20.7649	20.5168	20.0505	3	11.8	anatomical structure development;anatomical structure morphogenesis;biological regulation;biosynthetic process;catabolic process;cell surface receptor linked signaling pathway;cellular biosynthetic process;cellular catabolic process;cellular macromolecule biosynthetic process;cellular macromolecule catabolic process;cellular macromolecule metabolic process;cellular metabolic process;cellular nitr…	binding;catalytic activity;cysteine-type peptidase activity;endopeptidase inhibitor activity;endopeptidase regulator activity;enzyme inhibitor activity;enzyme regulator activity;exopeptidase activity;hydrolase activity;omega peptidase activity;peptidase activity;peptidase activity, acting on L-amino acid peptides;peptidase inhibitor activity;peptidase regulator activity;proteasome binding;protein…	cell part;chromatin remodeling complex;chromosomal part;cytoplasmic part;cytosol;DNA helicase complex;Ino8 complex;intracellular;intracellular membrane-bounded organelle;intracellular organelle;intracellular organelle part;intracellular part;macromolecular complex;membrane-bounded organelle;nuclear chromosome part;nuclear part;nucleus;organelle;organelle part;proteasome complex;protein complex								-0.02793	20.451	-0.0532687	0.959145	0.976622	-6.52637							NPC.iPS	Neu.iPS	Neu.NPC
P07237;H7BZ94;F5H8J2;H0Y3Z3	Protein disulfide-isomerase	P4HB	27.4549	27.507	27.9736	28.233	28.0615	28.2742	27.6505	28.0174	28.315	42	73.2	4-hydroxyproline metabolic process;amine metabolic process;biological regulation;carboxylic acid metabolic process;cell redox homeostasis;cellular amine metabolic process;cellular amino acid metabolic process;cellular component organization;cellular component organization at cellular level;cellular component organization or biogenesis;cellular component organization or biogenesis at cellular leve…	catalytic activity;endopeptidase activity;hydrolase activity;intramolecular oxidoreductase activity;intramolecular oxidoreductase activity, interconverting keto- and enol-groups;intramolecular oxidoreductase activity, transposing S-S bonds;isomerase activity;oxidoreductase activity;oxidoreductase activity, acting on paired donors, with incorporation or reduction of molecular oxygen;oxidoreductase…	adherens junction;anchoring junction;cell junction;cell part;cell-substrate adherens junction;cell-substrate junction;cytoplasmic membrane-bounded vesicle;cytoplasmic part;cytoplasmic vesicle;endoplasmic reticulum;endoplasmic reticulum lumen;endoplasmic reticulum part;endoplasmic reticulum-Golgi intermediate compartment;extracellular membrane-bounded organelle;extracellular organelle;extracellula…	Protein processing in endoplasmic reticulum	0.54439	27.9174	1.86012	0.102038	0.2974	-5.25117	0.34913	27.8197	1.03249	0.330697	0.483494	-6.314	-0.19526	28.0919	-0.594046	0.56994	0.783502	-6.53754	NPC.iPS	Neu.iPS	Neu.NPC
H0YBU8;H0Y6Y8;B1AL05;Q8N983-4;Q8N983-3;Q8N983-2;Q8N983;Q8N983-6;Q8N983-7	39S ribosomal protein L43, mitochondrial	MRPL43		21.4747	20.8524		20.0789			19.6413		2	14.9	biosynthetic process;cellular biosynthetic process;cellular component disassembly;cellular component disassembly at cellular level;cellular component organization;cellular component organization at cellular level;cellular component organization or biogenesis;cellular component organization or biogenesis at cellular level;cellular macromolecular complex disassembly;cellular macromolecular complex …	structural constituent of ribosome;structural molecule activity	cell part;cytoplasmic part;intracellular non-membrane-bounded organelle;intracellular organelle;intracellular organelle part;intracellular part;macromolecular complex;membrane;mitochondrial inner membrane;mitochondrial membrane;mitochondrial part;mitochondrial ribosome;non-membrane-bounded organelle;organellar ribosome;organelle;organelle inner membrane;organelle membrane;organelle part;ribonucle…		-1.08469	20.802	-1.91444	0.119226	0.323956	-4.85865	-1.52229	20.6561	-2.58299	0.0459238	0.121105	-3.98868	-0.4376	19.8601	-0.588557	0.591934	0.794305	-5.99143	NPC.iPS	Neu.iPS	Neu.NPC
Q5QJE6	Deoxynucleotidyltransferase terminal-interacting protein 2	DNTTIP2		21.3415	20.6988	21.7902						3	6.5	biological regulation;biosynthetic process;cellular biosynthetic process;cellular macromolecule biosynthetic process;cellular macromolecule metabolic process;cellular metabolic process;cellular nitrogen compound metabolic process;cellular process;macromolecule biosynthetic process;macromolecule metabolic process;metabolic process;nitrogen compound metabolic process;nucleic acid metabolic process;…		cell part;intracellular membrane-bounded organelle;intracellular non-membrane-bounded organelle;intracellular organelle;intracellular organelle part;intracellular part;membrane-bounded organelle;non-membrane-bounded organelle;nuclear part;nucleolus;nucleus;organelle;organelle part		0.770025	21.2768	1.35018	0.240024	0.476391	-5.53626													NPC.iPS	Neu.iPS	Neu.NPC
Q5QPE4;Q9Y5X3;Q5QPE5	Sorting nexin-5	SNX5	20.7565	19.3925	20.8941		20.8299			19.6349		2	10	cellular component organization;cellular component organization at cellular level;cellular component organization or biogenesis;cellular component organization or biogenesis at cellular level;cellular membrane organization;cellular process;endocytosis;endosome transport;establishment of localization;establishment of localization in cell;establishment of protein localization;intracellular protein …	binding;cytoskeletal protein binding;dynactin binding;lipid binding;phosphatidylinositol binding;phospholipid binding;protein binding	cell part;cell projection;cytoplasmic part;cytoplasmic vesicle membrane;cytoplasmic vesicle part;early endosome membrane;endosomal part;endosome membrane;extrinsic to endosome membrane;extrinsic to internal side of plasma membrane;extrinsic to membrane;extrinsic to organelle membrane;extrinsic to plasma membrane;intracellular organelle part;intracellular part;macromolecular complex;macropinocytic…		0.48222	20.4682	0.670113	0.529589	0.718423	-6.2524	-0.71272	20.1695	-1.0003	0.353543	0.504417	-6.00253	-1.19494	20.2324	-1.60715	0.193131	0.46106	-5.01767	NPC.iPS	Neu.iPS	Neu.NPC
Q5QPL9;Q9UKM9-2;Q9UKM9;Q5QPM0;Q5QPM1;Q5QPM2	RNA-binding protein Raly	RALY	24.9208	24.9725	23.7445	25.5464	26.1552	25.9645	25.2374	25.6001	25.9775	10	44.3	cellular macromolecule metabolic process;cellular metabolic process;cellular nitrogen compound metabolic process;cellular process;macromolecule metabolic process;metabolic process;mRNA metabolic process;mRNA processing;nitrogen compound metabolic process;nuclear mRNA splicing, via spliceosome;nucleic acid metabolic process;nucleobase-containing compound metabolic process;primary metabolic process…	binding;nucleic acid binding;nucleotide binding;RNA binding	catalytic step 2 spliceosome;cell part;intracellular membrane-bounded organelle;intracellular organelle;intracellular organelle part;intracellular part;macromolecular complex;membrane-bounded organelle;nuclear part;nucleus;organelle;organelle part;ribonucleoprotein complex;spliceosomal complex		1.34276	25.2173	3.24572	0.0127054	0.0962095	-3.17247	1.05905	25.0755	2.4809	0.0367558	0.104438	-4.32254	-0.283717	25.7468	-0.794112	0.451495	0.707879	-6.39204	NPC.iPS	Neu.iPS	Neu.NPC
Q5QPM7;Q92530;F5H4Z3;Q5QPM9	Proteasome inhibitor PI31 subunit	PSMF1								20.4692		4	30	activation of immune response;activation of innate immune response;anaphase-promoting complex-dependent proteasomal ubiquitin-dependent protein catabolic process;antigen processing and presentation;antigen processing and presentation of exogenous antigen;antigen processing and presentation of exogenous peptide antigen;antigen processing and presentation of exogenous peptide antigen via MHC class …	binding;endopeptidase inhibitor activity;endopeptidase regulator activity;enzyme inhibitor activity;enzyme regulator activity;peptidase inhibitor activity;peptidase regulator activity;proteasome binding;protein binding;protein complex binding	cell part;cytoplasm;cytoplasmic part;cytosol;endoplasmic reticulum;intracellular membrane-bounded organelle;intracellular organelle;intracellular organelle part;intracellular part;macromolecular complex;membrane;membrane-bounded organelle;nuclear part;nucleoplasm;organelle;organelle part;proteasome core complex;protein complex	Proteasome																			NPC.iPS	Neu.iPS	Neu.NPC
Q5RI15;Q5RI15-2	Cytochrome c oxidase protein 20 homolog	COX20	22.4475	22.3276	21.9332	22.077	22.3956		21.9667		23.5106	2	22			cell part;cytoplasmic part;integral to membrane;intracellular membrane-bounded organelle;intracellular organelle;intracellular organelle part;intracellular part;intrinsic to membrane;membrane;membrane part;membrane-bounded organelle;mitochondrial membrane;mitochondrial part;mitochondrion;organelle;organelle membrane;organelle part		0.000158333	22.2362	0.000449165	0.999655	0.999655	-6.73212	0.502568	22.4371	0.96779	0.363761	0.514305	-6.26544	0.50241	22.4875	0.792766	0.460682	0.711914	-6.18702	NPC.iPS	Neu.iPS	Neu.NPC
Q5SQI0-5;Q5SQI0-4;Q5SQI0;Q5SQI0-2	Alpha-tubulin N-acetyltransferase 1	ATAT1				21.3837	22.2253	21.0639	24.8625	24.1531	26.0188	13	50.8	alpha-tubulin acetylation;anatomical structure development;biological regulation;cell development;cellular component organization;cellular component organization at cellular level;cellular component organization or biogenesis;cellular component organization or biogenesis at cellular level;cellular developmental process;cellular macromolecule metabolic process;cellular metabolic process;cellular p…	acetyltransferase activity;binding;catalytic activity;coenzyme binding;cofactor binding;N-acetyltransferase activity;N-acyltransferase activity;peptide N-acetyltransferase activity;transferase activity;transferase activity, transferring acyl groups;transferase activity, transferring acyl groups other than amino-acyl groups;tubulin N-acetyltransferase activity	adherens junction;anchoring junction;axon;cell junction;cell part;cell projection;cell-substrate adherens junction;cell-substrate junction;coated pit;cytoplasmic part;cytoskeletal part;cytosol;focal adhesion;intracellular non-membrane-bounded organelle;intracellular organelle;intracellular organelle part;intracellular part;membrane part;mitotic spindle;neuron projection;non-membrane-bounded organ…														3.45383	23.2845	6.22842	0.000326307	0.0170767	0.71226	NPC.iPS	Neu.iPS	Neu.NPC
Q5SQI0-7;Q5SQI0-6;Q5SQI0-3	Alpha-tubulin N-acetyltransferase 1	ATAT1								20.0084	20.8668	1	9.7	alpha-tubulin acetylation;anatomical structure development;biological regulation;cell development;cellular component organization;cellular component organization at cellular level;cellular component organization or biogenesis;cellular component organization or biogenesis at cellular level;cellular developmental process;cellular macromolecule metabolic process;cellular metabolic process;cellular p…	acetyltransferase activity;binding;catalytic activity;coenzyme binding;cofactor binding;N-acetyltransferase activity;N-acyltransferase activity;peptide N-acetyltransferase activity;transferase activity;transferase activity, transferring acyl groups;transferase activity, transferring acyl groups other than amino-acyl groups;tubulin N-acetyltransferase activity	adherens junction;anchoring junction;axon;cell junction;cell part;cell projection;cell-substrate adherens junction;cell-substrate junction;coated pit;cytoplasmic part;cytoskeletal part;cytosol;focal adhesion;intracellular non-membrane-bounded organelle;intracellular organelle;intracellular organelle part;intracellular part;membrane part;mitotic spindle;neuron projection;non-membrane-bounded organ…																				NPC.iPS	Neu.iPS	Neu.NPC
Q5SRE5-2;Q5SRE5;H7C4K7	Nucleoporin NUP188 homolog	NUP188	20.6477	20.9065	21.7786	20.7953	19.5349	22.2164	20.6113	21.0528		3	3.1	biological regulation;biosynthetic process;carbohydrate metabolic process;carbohydrate transport;cell cycle;cell cycle process;cell surface receptor linked signaling pathway;cellular biosynthetic process;cellular component disassembly;cellular component disassembly at cellular level;cellular component organization;cellular component organization at cellular level;cellular component organization o…		cell part;envelope;intracellular organelle part;intracellular part;macromolecular complex;membrane;membrane part;nuclear envelope;nuclear part;nuclear pore;organelle envelope;organelle part;pore complex;protein complex	RNA transport	-0.262077	20.9799	-0.391509	0.706216	0.842166	-6.75736	-0.27895	20.9994	-0.610053	0.560119	0.696629	-6.55569	-0.0168733	20.8421	-0.0218286	0.983239	0.991494	-6.62003	NPC.iPS	Neu.iPS	Neu.NPC
Q5SSJ5-2;Q5SSJ5;X6RGJ2;B0QZK4;Q5SWC8;Q5SSJ5-3	Heterochromatin protein 1-binding protein 3	HP1BP3	20.1153	21.4093	18.6131	24.1268	24.1057	24.6058	26.6165	26.6568	25.5025	16	27.8	biological regulation;cellular component assembly;cellular component assembly at cellular level;cellular component organization;cellular component organization at cellular level;cellular component organization or biogenesis;cellular component organization or biogenesis at cellular level;cellular macromolecular complex assembly;cellular macromolecular complex subunit organization;cellular process;…	binding;chromatin binding;DNA binding;nucleic acid binding;nucleosome binding	cell part;chromosomal part;chromosome;intracellular membrane-bounded organelle;intracellular non-membrane-bounded organelle;intracellular organelle;intracellular organelle part;intracellular part;macromolecular complex;membrane-bounded organelle;non-membrane-bounded organelle;nucleosome;nucleus;organelle;organelle part;protein-DNA complex		4.23354	22.1626	6.4691	0.000247389	0.0109774	0.93809	6.21272	23.1522	9.1273	1.22457e-05	0.000504221	3.88731	1.97919	25.269	4.71082	0.001805	0.0386433	-1.05227	NPC.iPS	Neu.iPS	Neu.NPC
P07305-2;P07305	Histone H1.0;Histone H1.0, N-terminally processed	H1F0	23.0772	21.8294	21.2599							2	10.2	apoptosis;catabolic process;cell death;cellular catabolic process;cellular component assembly;cellular component assembly at cellular level;cellular component disassembly;cellular component disassembly at cellular level;cellular component disassembly involved in apoptosis;cellular component organization;cellular component organization at cellular level;cellular component organization or biogenesi…	binding;chromatin binding;chromatin DNA binding;DNA binding;nucleic acid binding;structure-specific DNA binding	actin cytoskeleton;cell part;chromatin;chromosomal part;cytoplasmic part;cytoskeleton;euchromatin;Golgi apparatus;intracellular membrane-bounded organelle;intracellular non-membrane-bounded organelle;intracellular organelle;intracellular organelle part;intracellular part;macromolecular complex;membrane-bounded organelle;non-membrane-bounded organelle;nuclear chromatin;nuclear chromosome part;nucl…																				NPC.iPS	Neu.iPS	Neu.NPC
Q5SW79;Q5SW79-2;Q5SW79-3;H0Y2V6	Centrosomal protein of 170 kDa	CEP170	20.9029			21.7534	21.9314	22.2133	23.7598	23.6991	25.8795	14	12.5		binding;identical protein binding;protein binding	cell part;centriole;centrosome;cytoplasm;cytoplasmic part;cytoskeletal part;intracellular non-membrane-bounded organelle;intracellular organelle;intracellular organelle part;intracellular part;macromolecular complex;membrane;microtubule;microtubule organizing center;microtubule organizing center part;non-membrane-bounded organelle;nuclear membrane;nuclear part;organelle;organelle membrane;organel…		1.0631	21.7003	2.30106	0.0643815	0.230429	-4.37494	3.5432	23.5603	3.8125	0.00785303	0.0352411	-2.31749	2.4801	23.2061	4.08032	0.00403994	0.059448	-1.88867	NPC.iPS	Neu.iPS	Neu.NPC
B1ALK7;Q14155-6;Q14155-1;Q14155-5;Q14155-2;Q14155-3;Q14155;E7EUY6;E9PDQ5	Rho guanine nucleotide exchange factor 7	ARHGEF7	19.0823		20.5456	20.9376	20.9391	19.9891	20.0197	20.8328	21.6127	4	8.7	apoptosis;axon guidance;biological regulation;cell death;cell differentiation;cell junction assembly;cell junction organization;cell projection assembly;cell projection organization;cell surface receptor linked signaling pathway;cell-substrate junction assembly;cellular component assembly;cellular component assembly at cellular level;cellular component organization;cellular component organization…	binding;enzyme activator activity;enzyme binding;enzyme regulator activity;GTPase activator activity;GTPase regulator activity;guanyl-nucleotide exchange factor activity;kinase binding;nucleoside-triphosphatase regulator activity;protein binding;protein kinase binding;Ras guanyl-nucleotide exchange factor activity;Rho guanyl-nucleotide exchange factor activity;small GTPase regulator activity	adherens junction;anchoring junction;cell body;cell cortex;cell junction;cell part;cell projection;cell-cell junction;cell-substrate adherens junction;cell-substrate junction;cytoplasmic part;cytosol;focal adhesion;intracellular;intracellular part;lamellipodium;macromolecular complex;neuron projection;neuronal cell body;protein complex;ruffle	Pancreatic cancer;Regulation of actin cytoskeleton	0.807987	20.2987	1.44754	0.193753	0.426301	-5.70111	1.00779	20.4186	1.62888	0.145116	0.270861	-5.49196	0.199807	20.7218	0.397944	0.701745	0.854462	-6.64259	NPC.iPS	Neu.iPS	Neu.NPC
[truncated: 2,551 more rows]

## Sheet: Mus musculus
Protein	DIV0.1	DIV0.2	DIV0.3	DIV3.1	DIV3.2	DIV3.3	DIV10.1	DIV10.2	DIV10.3	Pool	logFC.DIV3.DIV0	AveExpr.DIV3.DIV0	t.DIV3.DIV0	P.Value.DIV3.DIV0	adj.P.Val.DIV3.DIV0	B.DIV3.DIV0	logFC.DIV10.DIV0	AveExpr.DIV10.DIV0	t.DIV10.DIV0	P.Value.DIV10.DIV0	adj.P.Val.DIV10.DIV0	B.DIV10.DIV0	logFC.DIV10.DIV3	AveExpr.DIV10.DIV3	t.DIV10.DIV3	P.Value.DIV10.DIV3	adj.P.Val.DIV10.DIV3	B.DIV10.DIV3	Gene.name	condition1	condition2	condition3
A2A432	16.6909	16.7223	16.4782	15.8261	15.6557	15.6683	15.6999	15.8424	15.7046	15.6735	-0.91379	16.1736	-7.80525	4.10771e-05	0.000255203	2.39527	-0.881509	16.1897	-9.63119	1.88582e-06	3.96129e-06	4.78392	0.0322813	15.7328	0.311586	0.763325	0.800104	-7.34881	CUL4B	DIV3DIV0	DIV10DIV0	DIV10DIV3
[truncated: 5,658 more rows]

## Sheet: Rattus norvegicus
id	id	DIV5.rep1	DIV14.rep1	DIV14.rep2	DIV1.rep2	DIV5.rep2	Log.DIV5.DIV1	Log.DIV14.DIV1	Log.DIV14.DIV5	SYMBOL	DIV5.DIV1.fdrtool.pvalue	DIV14.DIV1.fdrtool.pvalue	DIV14.DIV5.fdrtool.pvalue	DIV5.DIV1.fdrtool.qvalue	DIV14.DIV1.fdrtool.qvalue	DIV14.DIV5.fdrtool.qvalue	condition1	condition2
[truncated: 4,499 more rows]

[truncated: 1 more sheets: Danio rerio]
