# Supplementary material for: Conserved exchange of paralog proteins during neuronal differentiation
Source: bioRxiv preprint, doi:10.1101/2021.07.22.453347, version 1 (2021-07-23)
Supplement: Table S5 [file 453347_file06.xlsx]

## Sheet: Summary
Paralog Pairs
MS Proteome data for paralog pairs from neuronal differentiation in multiple species
Only differentially expressed paralog across different datasets are shown
	column names
	p.x	paralog gene name 1
	p.y	paralog gene name 2
	x.exp	Log2 MS protein quantification data paralog 1
	x.exp	Log2 MS protein quantification data paralog 2
	dir	direction of log2 fold change, same or opposite
	organism	species
	condition	neuronal differentiation reference comparison
GOEnrichment (ORA)
GOEnrichment Analysis (ORA) for paralog pairs regulated in opposite directions
against all other paralog pairs.
	column names
	GO.ID	GOTerm ID
	Term	GO Term name
	Annotated	Annotated genes for specific GOTerm
	Significant	The number of significant gene in the set
	Expected	expected value from background
	classic	Fisher test p value
	p.adjust	adjusted p value
	cond	dataset to which the GO was referred

## Sheet: Paralog Pairs
p.x	p.y	x.exp	y.exp	dir	organism	condition
LRP4	LDLR	0.580738	0.78401	same	mmusculus	DIV10DIV3
ABLIM1	DMTN	1.19205	1.98716	same	mmusculus	DIV10DIV3
ABLIM2	DMTN	1.72534	1.98716	same	mmusculus	DIV10DIV3
ABLIM3	DMTN	0.683251	1.98716	same	mmusculus	DIV10DIV3
UHRF2	UHRF1	-2.2736	-0.999681	same	mmusculus	DIV10DIV3
SPTBN1	DMD	1.58523	0.662038	same	mmusculus	DIV10DIV3
SYNE2	DMD	-1.68097	0.662038	opposite	mmusculus	DIV10DIV3
FLNC	DMD	-1.21964	0.662038	opposite	mmusculus	DIV10DIV3
FLNA	DMD	-0.924301	0.662038	opposite	mmusculus	DIV10DIV3
SYNE1	DMD	1.23709	0.662038	same	mmusculus	DIV10DIV3
PLEC	DMD	0.895815	0.662038	same	mmusculus	DIV10DIV3
ACTN1	DMD	0.663592	0.662038	same	mmusculus	DIV10DIV3
FLNB	DMD	-1.05224	0.662038	opposite	mmusculus	DIV10DIV3
DSP	DMD	-1.07846	0.662038	opposite	mmusculus	DIV10DIV3
CLMN	DMD	1.30785	0.662038	same	mmusculus	DIV10DIV3
DTNA	DMD	0.818778	0.662038	same	mmusculus	DIV10DIV3
MICAL1	DMD	-1.2204	0.662038	opposite	mmusculus	DIV10DIV3
SPTAN1	DMD	1.20463	0.662038	same	mmusculus	DIV10DIV3
SLC12A7	SLC12A5	-1.14746	1.61268	opposite	mmusculus	DIV10DIV3
SLC12A6	SLC12A5	1.47587	1.61268	same	mmusculus	DIV10DIV3
RFC2	RFC3	-0.962909	-0.810148	same	mmusculus	DIV10DIV3
SLC32A1	SLC38A3	2.51888	2.33014	same	mmusculus	DIV10DIV3
SLC38A10	SLC38A3	-0.589924	2.33014	opposite	mmusculus	DIV10DIV3
ZFR	ADAT1	-1.08437	-0.697691	same	mmusculus	DIV10DIV3
STRBP	ADAT1	-1.27998	-0.697691	same	mmusculus	DIV10DIV3
ILF3	ADAT1	-1.10409	-0.697691	same	mmusculus	DIV10DIV3
PEPD	XPNPEP1	0.675164	1.13027	same	mmusculus	DIV10DIV3
BCLAF1	THRAP3	-1.37676	-1.47622	same	mmusculus	DIV10DIV3
BCLAF3	THRAP3	-0.850061	-1.47622	same	mmusculus	DIV10DIV3
LGI1	ELFN2	2.26043	1.47899	same	mmusculus	DIV10DIV3
LRIG1	ELFN2	0.814767	1.47899	same	mmusculus	DIV10DIV3
ELFN1	ELFN2	1.28227	1.47899	same	mmusculus	DIV10DIV3
SPTBN1	DSP	1.58523	-1.07846	opposite	mmusculus	DIV10DIV3
SYNE2	DSP	-1.68097	-1.07846	same	mmusculus	DIV10DIV3
FLNC	DSP	-1.21964	-1.07846	same	mmusculus	DIV10DIV3
FLNA	DSP	-0.924301	-1.07846	same	mmusculus	DIV10DIV3
SYNE1	DSP	1.23709	-1.07846	opposite	mmusculus	DIV10DIV3
PLEC	DSP	0.895815	-1.07846	opposite	mmusculus	DIV10DIV3
ACTN1	DSP	0.663592	-1.07846	opposite	mmusculus	DIV10DIV3
FLNB	DSP	-1.05224	-1.07846	same	mmusculus	DIV10DIV3
CLMN	DSP	1.30785	-1.07846	opposite	mmusculus	DIV10DIV3
DTNA	DSP	0.818778	-1.07846	opposite	mmusculus	DIV10DIV3
DMD	DSP	0.662038	-1.07846	opposite	mmusculus	DIV10DIV3
MICAL1	DSP	-1.2204	-1.07846	same	mmusculus	DIV10DIV3
SPTAN1	DSP	1.20463	-1.07846	opposite	mmusculus	DIV10DIV3
PCYT1B	PCYT2	1.18841	1.33803	same	mmusculus	DIV10DIV3
PCBP1	FUBP1	-0.7054	-1.02671	same	mmusculus	DIV10DIV3
KHSRP	FUBP1	-0.63237	-1.02671	same	mmusculus	DIV10DIV3
IGF2BP2	FUBP1	-0.888217	-1.02671	same	mmusculus	DIV10DIV3
IGF2BP3	FUBP1	-1.16162	-1.02671	same	mmusculus	DIV10DIV3
HNRNPK	FUBP1	-0.620245	-1.02671	same	mmusculus	DIV10DIV3
PCBP3	FUBP1	0.987192	-1.02671	opposite	mmusculus	DIV10DIV3
IGF2BP1	FUBP1	-1.71191	-1.02671	same	mmusculus	DIV10DIV3
SRSF3	SRSF6	-0.765729	-0.735089	same	mmusculus	DIV10DIV3
SRSF7	SRSF6	-1.01079	-0.735089	same	mmusculus	DIV10DIV3
SRSF1	SRSF6	-0.652343	-0.735089	same	mmusculus	DIV10DIV3
SRSF9	SRSF6	-0.903548	-0.735089	same	mmusculus	DIV10DIV3
RSRC2	SRSF6	-1.34382	-0.735089	same	mmusculus	DIV10DIV3
SRR	CBS	1.95763	1.42704	same	mmusculus	DIV10DIV3
RBMS2	TARDBP	-1.32225	-1.57171	same	mmusculus	DIV10DIV3
RBM14	TARDBP	-1.22746	-1.57171	same	mmusculus	DIV10DIV3
ELAVL1	TARDBP	-0.77794	-1.57171	same	mmusculus	DIV10DIV3
SF3B4	TARDBP	-1.13479	-1.57171	same	mmusculus	DIV10DIV3
PUF60	TARDBP	-0.59662	-1.57171	same	mmusculus	DIV10DIV3
ELAVL2	TARDBP	-0.808738	-1.57171	same	mmusculus	DIV10DIV3
RBM45	TARDBP	-0.841617	-1.57171	same	mmusculus	DIV10DIV3
ZFP280D	ZBTB14	-1.40043	-2.00771	same	mmusculus	DIV10DIV3
ZFP580	ZBTB14	-1.34791	-2.00771	same	mmusculus	DIV10DIV3
ZFP280C	ZBTB14	-1.13648	-2.00771	same	mmusculus	DIV10DIV3
ZBTB33	ZBTB14	-1.41378	-2.00771	same	mmusculus	DIV10DIV3
FEZF2	ZBTB14	-2.49331	-2.00771	same	mmusculus	DIV10DIV3
NPEPPS	ERAP1	0.807432	0.603087	same	mmusculus	DIV10DIV3
CNTN3	VCAM1	1.07014	1.6122	same	mmusculus	DIV10DIV3
CNTN6	VCAM1	1.26179	1.6122	same	mmusculus	DIV10DIV3
NFASC	VCAM1	0.849798	1.6122	same	mmusculus	DIV10DIV3
NRCAM	VCAM1	0.86617	1.6122	same	mmusculus	DIV10DIV3
CHL1	VCAM1	1.1584	1.6122	same	mmusculus	DIV10DIV3
IGSF21	VCAM1	1.05548	1.6122	same	mmusculus	DIV10DIV3
CNTN2	VCAM1	-0.690733	1.6122	opposite	mmusculus	DIV10DIV3
NCAM2	VCAM1	1.11305	1.6122	same	mmusculus	DIV10DIV3
CNTN5	VCAM1	1.12944	1.6122	same	mmusculus	DIV10DIV3
CNTN1	VCAM1	1.35973	1.6122	same	mmusculus	DIV10DIV3
HNRNPA2B1	RBMX	-0.931961	-1.76124	same	mmusculus	DIV10DIV3
HNRNPAB	RBMX	-1.53657	-1.76124	same	mmusculus	DIV10DIV3
RBM4B	RBMX	-2.25259	-1.76124	same	mmusculus	DIV10DIV3
HNRNPD	RBMX	-0.656835	-1.76124	same	mmusculus	DIV10DIV3
DAZAP1	RBMX	-1.35649	-1.76124	same	mmusculus	DIV10DIV3
MSI1	RBMX	-0.901776	-1.76124	same	mmusculus	DIV10DIV3
HNRNPA3	RBMX	-0.681519	-1.76124	same	mmusculus	DIV10DIV3
HNRNPA1	RBMX	-1.06854	-1.76124	same	mmusculus	DIV10DIV3
HNRNPA0	RBMX	-2.56571	-1.76124	same	mmusculus	DIV10DIV3
TIA1	RBMX	-1.29589	-1.76124	same	mmusculus	DIV10DIV3
RBM39	RBMX	-0.769526	-1.76124	same	mmusculus	DIV10DIV3
CIRBP	RBMX	-1.16632	-1.76124	same	mmusculus	DIV10DIV3
RBMXL1	RBMX	-1.26163	-1.76124	same	mmusculus	DIV10DIV3
PPP5C	PPP3CA	0.596574	1.03843	same	mmusculus	DIV10DIV3
PPP4C	PPP3CA	-0.843923	1.03843	opposite	mmusculus	DIV10DIV3
PPP3CC	PPP3CA	0.897289	1.03843	same	mmusculus	DIV10DIV3
PPP3CB	PPP3CA	1.1114	1.03843	same	mmusculus	DIV10DIV3
PPP2CA	PPP3CA	-1.07675	1.03843	opposite	mmusculus	DIV10DIV3
STMN4	STMN2	0.639139	0.724682	same	mmusculus	DIV10DIV3
FNTB	RABGGTB	0.628072	1.07285	same	mmusculus	DIV10DIV3
ARL4C	ARL6	0.808223	-1.08713	opposite	mmusculus	DIV10DIV3
ARF5	ARL6	0.590393	-1.08713	opposite	mmusculus	DIV10DIV3
ARF6	ARL6	0.774177	-1.08713	opposite	mmusculus	DIV10DIV3
ARF1	ARL6	1.0635	-1.08713	opposite	mmusculus	DIV10DIV3
ARF2	ARL6	1.04326	-1.08713	opposite	mmusculus	DIV10DIV3
AHCYL2	AHCYL1	0.647936	1.06393	same	mmusculus	DIV10DIV3
RBM10	RBM5	-1.42375	-1.19306	same	mmusculus	DIV10DIV3
KDM6A	KDM6B	-0.608468	-1.48189	same	mmusculus	DIV10DIV3
CARMIL3	CARMIL1	0.609587	0.883375	same	mmusculus	DIV10DIV3
RNH1	CARMIL1	-0.673836	0.883375	opposite	mmusculus	DIV10DIV3
HNRNPA2B1	HNRNPD	-0.931961	-0.656835	same	mmusculus	DIV10DIV3
HNRNPAB	HNRNPD	-1.53657	-0.656835	same	mmusculus	DIV10DIV3
RBM4B	HNRNPD	-2.25259	-0.656835	same	mmusculus	DIV10DIV3
DAZAP1	HNRNPD	-1.35649	-0.656835	same	mmusculus	DIV10DIV3
MSI1	HNRNPD	-0.901776	-0.656835	same	mmusculus	DIV10DIV3
HNRNPA3	HNRNPD	-0.681519	-0.656835	same	mmusculus	DIV10DIV3
HNRNPA1	HNRNPD	-1.06854	-0.656835	same	mmusculus	DIV10DIV3
HNRNPA0	HNRNPD	-2.56571	-0.656835	same	mmusculus	DIV10DIV3
TIA1	HNRNPD	-1.29589	-0.656835	same	mmusculus	DIV10DIV3
RBM39	HNRNPD	-0.769526	-0.656835	same	mmusculus	DIV10DIV3
RBMX	HNRNPD	-1.76124	-0.656835	same	mmusculus	DIV10DIV3
RBMXL1	HNRNPD	-1.26163	-0.656835	same	mmusculus	DIV10DIV3
CIRBP	HNRNPD	-1.16632	-0.656835	same	mmusculus	DIV10DIV3
PSME3	PSME1	-0.68545	-0.698151	same	mmusculus	DIV10DIV3
NOP56	NOP58	-0.964222	-1.33356	same	mmusculus	DIV10DIV3
PSME1	PSME3	-0.698151	-0.68545	same	mmusculus	DIV10DIV3
SIRT5	SIRT7	-1.27253	-1.31293	same	mmusculus	DIV10DIV3
SIRT3	SIRT7	0.685015	-1.31293	opposite	mmusculus	DIV10DIV3
SIRT1	SIRT7	-0.90576	-1.31293	same	mmusculus	DIV10DIV3
BCL9	BCL9L	-0.757091	-1.85917	same	mmusculus	DIV10DIV3
CADM1	NECTIN1	1.70519	1.34446	same	mmusculus	DIV10DIV3
CADM3	NECTIN1	1.02081	1.34446	same	mmusculus	DIV10DIV3
STX16	STX1A	0.690438	1.82526	same	mmusculus	DIV10DIV3
STX1B	STX1A	0.917652	1.82526	same	mmusculus	DIV10DIV3
SYT1	SYT11	1.57407	1.23914	same	mmusculus	DIV10DIV3
RPH3A	SYT11	1.80671	1.23914	same	mmusculus	DIV10DIV3
SYT7	SYT11	1.49364	1.23914	same	mmusculus	DIV10DIV3
SYT5	SYT11	0.59381	1.23914	same	mmusculus	DIV10DIV3
PTPRA	PTPN2	0.693595	-0.855354	opposite	mmusculus	DIV10DIV3
PTPRZ1	PTPN2	0.715479	-0.855354	opposite	mmusculus	DIV10DIV3
PTPRN2	PTPN2	1.40545	-0.855354	opposite	mmusculus	DIV10DIV3
PTPRF	PTPN2	0.959329	-0.855354	opposite	mmusculus	DIV10DIV3
PTPRS	PTPN2	0.940397	-0.855354	opposite	mmusculus	DIV10DIV3
PTPRD	PTPN2	1.0235	-0.855354	opposite	mmusculus	DIV10DIV3
PTPRT	PTPN2	0.734897	-0.855354	opposite	mmusculus	DIV10DIV3
PTPRE	PTPN2	1.67223	-0.855354	opposite	mmusculus	DIV10DIV3
RAB40C	RAB33A	-1.24165	0.77652	opposite	mmusculus	DIV10DIV3
RAB3D	RAB33A	0.648294	0.77652	same	mmusculus	DIV10DIV3
RAB3B	RAB33A	1.08809	0.77652	same	mmusculus	DIV10DIV3
RAB4B	RAB33A	0.930811	0.77652	same	mmusculus	DIV10DIV3
RAB6B	RAB33A	0.944791	0.77652	same	mmusculus	DIV10DIV3
RAB9	RAB33A	1.03935	0.77652	same	mmusculus	DIV10DIV3
RAB3C	RAB33A	0.888138	0.77652	same	mmusculus	DIV10DIV3
RAB4A	RAB33A	1.05334	0.77652	same	mmusculus	DIV10DIV3
RAB36	RAB33A	1.16447	0.77652	same	mmusculus	DIV10DIV3
RAB3A	RAB33A	1.3075	0.77652	same	mmusculus	DIV10DIV3
RAB8B	RAB33A	-0.613733	0.77652	opposite	mmusculus	DIV10DIV3
RAB33B	RAB33A	0.752241	0.77652	same	mmusculus	DIV10DIV3
RAB9B	RAB33A	1.40212	0.77652	same	mmusculus	DIV10DIV3
DR1	NFYB	-0.639101	-1.13623	same	mmusculus	DIV10DIV3
CD63	CD81	1.65165	1.92645	same	mmusculus	DIV10DIV3
TSPAN9	CD81	1.49045	1.92645	same	mmusculus	DIV10DIV3
TSPAN7	CD81	1.88994	1.92645	same	mmusculus	DIV10DIV3
PCGF6	PCGF2	-0.982399	-0.682552	same	mmusculus	DIV10DIV3
RNF2	PCGF2	-1.11986	-0.682552	same	mmusculus	DIV10DIV3
ACADS	ACADM	-0.604634	0.913415	opposite	mmusculus	DIV10DIV3
NEGR1	LSAMP	2.11781	1.07348	same	mmusculus	DIV10DIV3
NTM	LSAMP	1.12129	1.07348	same	mmusculus	DIV10DIV3
CPNE5	CPNE8	1.81489	2.33495	same	mmusculus	DIV10DIV3
CPNE4	CPNE8	1.75681	2.33495	same	mmusculus	DIV10DIV3
CPNE7	CPNE8	1.85384	2.33495	same	mmusculus	DIV10DIV3
CPNE2	CPNE8	1.8854	2.33495	same	mmusculus	DIV10DIV3
CASP7	CASP6	0.673648	-1.85004	opposite	mmusculus	DIV10DIV3
SLC25A14	SLC25A12	-0.8502	0.993716	opposite	mmusculus	DIV10DIV3
SLC25A13	SLC25A12	-1.15742	0.993716	opposite	mmusculus	DIV10DIV3
SLC25A18	SLC25A12	1.44432	0.993716	same	mmusculus	DIV10DIV3
SLC25A51	SLC25A12	-0.616439	0.993716	opposite	mmusculus	DIV10DIV3
SLC25A22	SLC25A12	1.10089	0.993716	same	mmusculus	DIV10DIV3
SLC25A24	SLC25A12	-1.88679	0.993716	opposite	mmusculus	DIV10DIV3
ZBTB20	ZBTB18	-1.73663	-1.28393	same	mmusculus	DIV10DIV3
ZFP281	ZBTB18	-0.798673	-1.28393	same	mmusculus	DIV10DIV3
ZFP148	ZBTB18	-1.07595	-1.28393	same	mmusculus	DIV10DIV3
ZFP91	ZBTB18	-1.52186	-1.28393	same	mmusculus	DIV10DIV3
ZBTB14	ZFP280C	-2.00771	-1.13648	same	mmusculus	DIV10DIV3
ZFP280D	ZFP280C	-1.40043	-1.13648	same	mmusculus	DIV10DIV3
ZFP580	ZFP280C	-1.34791	-1.13648	same	mmusculus	DIV10DIV3
ZBTB33	ZFP280C	-1.41378	-1.13648	same	mmusculus	DIV10DIV3
FEZF2	ZFP280C	-2.49331	-1.13648	same	mmusculus	DIV10DIV3
USP42	USP3	-1.51686	-1.60401	same	mmusculus	DIV10DIV3
USP48	USP3	-0.652494	-1.60401	same	mmusculus	DIV10DIV3
USP15	USP3	0.586476	-1.60401	opposite	mmusculus	DIV10DIV3
USP34	USP3	-0.598375	-1.60401	same	mmusculus	DIV10DIV3
USP36	USP3	-1.02697	-1.60401	same	mmusculus	DIV10DIV3
USP14	USP3	0.621406	-1.60401	opposite	mmusculus	DIV10DIV3
USP13	USP3	1.14313	-1.60401	opposite	mmusculus	DIV10DIV3
SRSF3	SRSF9	-0.765729	-0.903548	same	mmusculus	DIV10DIV3
SRSF7	SRSF9	-1.01079	-0.903548	same	mmusculus	DIV10DIV3
SRSF1	SRSF9	-0.652343	-0.903548	same	mmusculus	DIV10DIV3
SRSF6	SRSF9	-0.735089	-0.903548	same	mmusculus	DIV10DIV3
RSRC2	SRSF9	-1.34382	-0.903548	same	mmusculus	DIV10DIV3
ASAP1	AGAP2	1.27301	1.40804	same	mmusculus	DIV10DIV3
AGFG2	AGAP2	0.758681	1.40804	same	mmusculus	DIV10DIV3
APPL2	AGAP2	1.53724	1.40804	same	mmusculus	DIV10DIV3
AP2M1	AP3M2	0.767067	1.31645	same	mmusculus	DIV10DIV3
GATAD2A	GATAD2B	-0.903843	-1.30084	same	mmusculus	DIV10DIV3
RGS17	RGS6	2.53544	1.31864	same	mmusculus	DIV10DIV3
RGS7	RGS6	2.82723	1.31864	same	mmusculus	DIV10DIV3
INTS11	CPSF2	-1.16297	-0.820768	same	mmusculus	DIV10DIV3
CPSF3	CPSF2	-0.855579	-0.820768	same	mmusculus	DIV10DIV3
ACVR1	BMPR2	-0.963114	0.58812	opposite	mmusculus	DIV10DIV3
PEX5L	PEX5	1.69896	1.06978	same	mmusculus	DIV10DIV3
PTPRD	PTPRS	1.0235	0.940397	same	mmusculus	DIV10DIV3
PTPRA	PTPRS	0.693595	0.940397	same	mmusculus	DIV10DIV3
PTPRZ1	PTPRS	0.715479	0.940397	same	mmusculus	DIV10DIV3
PTPN2	PTPRS	-0.855354	0.940397	opposite	mmusculus	DIV10DIV3
PTPRN2	PTPRS	1.40545	0.940397	same	mmusculus	DIV10DIV3
PTPRF	PTPRS	0.959329	0.940397	same	mmusculus	DIV10DIV3
PTPRT	PTPRS	0.734897	0.940397	same	mmusculus	DIV10DIV3
PTPRE	PTPRS	1.67223	0.940397	same	mmusculus	DIV10DIV3
ARMCX1	GPRASP2	-0.898462	-0.730434	same	mmusculus	DIV10DIV3
ARMCX2	GPRASP2	-0.600249	-0.730434	same	mmusculus	DIV10DIV3
ARMC10	GPRASP2	-0.86095	-0.730434	same	mmusculus	DIV10DIV3
BUB3	RAE1	-0.848935	-0.805891	same	mmusculus	DIV10DIV3
SF3B3	CPSF1	-1.44927	-1.5352	same	mmusculus	DIV10DIV3
CAMK2B	CAMK2D	1.62736	1.99972	same	mmusculus	DIV10DIV3
CAMKV	CAMK2D	1.43622	1.99972	same	mmusculus	DIV10DIV3
PHKG2	CAMK2D	0.66199	1.99972	same	mmusculus	DIV10DIV3
CAMK1	CAMK2D	1.17746	1.99972	same	mmusculus	DIV10DIV3
DCLK1	CAMK2D	1.0405	1.99972	same	mmusculus	DIV10DIV3
CAMKK1	CAMK2D	0.79515	1.99972	same	mmusculus	DIV10DIV3
CAMK2A	CAMK2D	2.41172	1.99972	same	mmusculus	DIV10DIV3
CAMKK2	CAMK2D	1.34034	1.99972	same	mmusculus	DIV10DIV3
CAMK1D	CAMK2D	1.53194	1.99972	same	mmusculus	DIV10DIV3
ACSBG1	ACSL4	2.1002	1.11408	same	mmusculus	DIV10DIV3
ACSL6	ACSL4	0.84564	1.11408	same	mmusculus	DIV10DIV3
ACSL1	ACSL4	1.13959	1.11408	same	mmusculus	DIV10DIV3
ACSL3	ACSL4	0.667747	1.11408	same	mmusculus	DIV10DIV3
ALDH1B1	ALDH1L1	0.669216	2.00128	same	mmusculus	DIV10DIV3
ALDH1L2	ALDH1L1	-0.700947	2.00128	opposite	mmusculus	DIV10DIV3
MBTD1	L3MBTL3	-2.04728	-0.941377	same	mmusculus	DIV10DIV3
PHC2	L3MBTL3	-1.40886	-0.941377	same	mmusculus	DIV10DIV3
SAMD1	L3MBTL3	-1.04887	-0.941377	same	mmusculus	DIV10DIV3
SERPINE2	SERPINB6A	2.34764	1.26715	same	mmusculus	DIV10DIV3
ZMYND11	PHF21B	-1.39736	-0.955188	same	mmusculus	DIV10DIV3
MPP1	MPP6	1.05902	0.657626	same	mmusculus	DIV10DIV3
MPP2	MPP6	1.43841	0.657626	same	mmusculus	DIV10DIV3
CASK	MPP6	0.789574	0.657626	same	mmusculus	DIV10DIV3
CYTH3	ARFGEF2	1.22788	0.61184	same	mmusculus	DIV10DIV3
IQSEC3	ARFGEF2	1.12434	0.61184	same	mmusculus	DIV10DIV3
IQSEC1	ARFGEF2	1.08493	0.61184	same	mmusculus	DIV10DIV3
CYTH1	ARFGEF2	0.928429	0.61184	same	mmusculus	DIV10DIV3
PSD	ARFGEF2	0.630406	0.61184	same	mmusculus	DIV10DIV3
RAB40C	RAB8B	-1.24165	-0.613733	same	mmusculus	DIV10DIV3
RAB3D	RAB8B	0.648294	-0.613733	opposite	mmusculus	DIV10DIV3
RAB3B	RAB8B	1.08809	-0.613733	opposite	mmusculus	DIV10DIV3
RAB4B	RAB8B	0.930811	-0.613733	opposite	mmusculus	DIV10DIV3
RAB6B	RAB8B	0.944791	-0.613733	opposite	mmusculus	DIV10DIV3
RAB33A	RAB8B	0.77652	-0.613733	opposite	mmusculus	DIV10DIV3
RAB9	RAB8B	1.03935	-0.613733	opposite	mmusculus	DIV10DIV3
RAB3C	RAB8B	0.888138	-0.613733	opposite	mmusculus	DIV10DIV3
RAB4A	RAB8B	1.05334	-0.613733	opposite	mmusculus	DIV10DIV3
RAB36	RAB8B	1.16447	-0.613733	opposite	mmusculus	DIV10DIV3
RAB3A	RAB8B	1.3075	-0.613733	opposite	mmusculus	DIV10DIV3
RAB33B	RAB8B	0.752241	-0.613733	opposite	mmusculus	DIV10DIV3
RAB9B	RAB8B	1.40212	-0.613733	opposite	mmusculus	DIV10DIV3
SH3RF3	SH3GLB1	0.700037	1.37847	same	mmusculus	DIV10DIV3
SH3GLB2	SH3GLB1	1.07198	1.37847	same	mmusculus	DIV10DIV3
SH3GL2	SH3GLB1	1.52711	1.37847	same	mmusculus	DIV10DIV3
TUBB4A	TUBA4A	1.63932	2.42748	same	mmusculus	DIV10DIV3
TUBAL3	TUBA4A	0.705546	2.42748	same	mmusculus	DIV10DIV3
TUBB6	TUBA4A	1.39808	2.42748	same	mmusculus	DIV10DIV3
TUBB3	TUBA4A	1.0142	2.42748	same	mmusculus	DIV10DIV3
TUBB5	TUBA4A	0.80471	2.42748	same	mmusculus	DIV10DIV3
TUBB2B	TUBA4A	0.906607	2.42748	same	mmusculus	DIV10DIV3
TUBB2A	TUBA4A	1.85831	2.42748	same	mmusculus	DIV10DIV3
ARPC5	ARPC5L	0.850154	0.603364	same	mmusculus	DIV10DIV3
LGI1	ELFN1	2.26043	1.28227	same	mmusculus	DIV10DIV3
LRIG1	ELFN1	0.814767	1.28227	same	mmusculus	DIV10DIV3
ELFN2	ELFN1	1.47899	1.28227	same	mmusculus	DIV10DIV3
TNR	FN1	1.09438	-1.9364	opposite	mmusculus	DIV10DIV3
EPHB3	PDGFRA	0.767202	1.70428	same	mmusculus	DIV10DIV3
INSR	PDGFRA	-0.818123	1.70428	opposite	mmusculus	DIV10DIV3
EGFR	PDGFRA	0.819744	1.70428	same	mmusculus	DIV10DIV3
KIT	PDGFRA	1.22316	1.70428	same	mmusculus	DIV10DIV3
NTRK2	PDGFRA	0.67519	1.70428	same	mmusculus	DIV10DIV3
MTA2	MTA3	-1.68205	-1.06327	same	mmusculus	DIV10DIV3
MTA1	MTA3	-0.596588	-1.06327	same	mmusculus	DIV10DIV3
MIER1	MTA3	-0.822772	-1.06327	same	mmusculus	DIV10DIV3
TAGLN2	CNN3	-0.804613	-1.30336	same	mmusculus	DIV10DIV3
CDC42	RAC1	0.840247	0.647183	same	mmusculus	DIV10DIV3
RHOF	RAC1	1.17499	0.647183	same	mmusculus	DIV10DIV3
RAC3	RAC1	1.53222	0.647183	same	mmusculus	DIV10DIV3
PITPNM2	PITPNC1	0.764644	0.690952	same	mmusculus	DIV10DIV3
PITPNM1	PITPNC1	1.30799	0.690952	same	mmusculus	DIV10DIV3
CSNK1E	TTBK1	-0.872824	0.664741	opposite	mmusculus	DIV10DIV3
VRK1	TTBK1	-1.2601	0.664741	opposite	mmusculus	DIV10DIV3
CSNK1G1	TTBK1	0.682208	0.664741	same	mmusculus	DIV10DIV3
CSNK1G3	TTBK1	1.05705	0.664741	same	mmusculus	DIV10DIV3
VRK2	TTBK1	-1.39385	0.664741	opposite	mmusculus	DIV10DIV3
CHPF	CHSY1	-1.31964	-0.870474	same	mmusculus	DIV10DIV3
CPNE8	CPNE2	2.33495	1.8854	same	mmusculus	DIV10DIV3
CPNE5	CPNE2	1.81489	1.8854	same	mmusculus	DIV10DIV3
CPNE4	CPNE2	1.75681	1.8854	same	mmusculus	DIV10DIV3
CPNE7	CPNE2	1.85384	1.8854	same	mmusculus	DIV10DIV3
HNRNPA2B1	RBM39	-0.931961	-0.769526	same	mmusculus	DIV10DIV3
HNRNPAB	RBM39	-1.53657	-0.769526	same	mmusculus	DIV10DIV3
RBM4B	RBM39	-2.25259	-0.769526	same	mmusculus	DIV10DIV3
HNRNPD	RBM39	-0.656835	-0.769526	same	mmusculus	DIV10DIV3
DAZAP1	RBM39	-1.35649	-0.769526	same	mmusculus	DIV10DIV3
MSI1	RBM39	-0.901776	-0.769526	same	mmusculus	DIV10DIV3
HNRNPA3	RBM39	-0.681519	-0.769526	same	mmusculus	DIV10DIV3
HNRNPA1	RBM39	-1.06854	-0.769526	same	mmusculus	DIV10DIV3
HNRNPA0	RBM39	-2.56571	-0.769526	same	mmusculus	DIV10DIV3
TIA1	RBM39	-1.29589	-0.769526	same	mmusculus	DIV10DIV3
RBMX	RBM39	-1.76124	-0.769526	same	mmusculus	DIV10DIV3
RBMXL1	RBM39	-1.26163	-0.769526	same	mmusculus	DIV10DIV3
CIRBP	RBM39	-1.16632	-0.769526	same	mmusculus	DIV10DIV3
GSTP1	GSTM1	0.602432	1.35301	same	mmusculus	DIV10DIV3
PIP4K2A	PIP4K2B	0.904583	0.956961	same	mmusculus	DIV10DIV3
ARL6	ARL4C	-1.08713	0.808223	opposite	mmusculus	DIV10DIV3
ARF5	ARL4C	0.590393	0.808223	same	mmusculus	DIV10DIV3
ARF6	ARL4C	0.774177	0.808223	same	mmusculus	DIV10DIV3
ARF1	ARL4C	1.0635	0.808223	same	mmusculus	DIV10DIV3
ARF2	ARL4C	1.04326	0.808223	same	mmusculus	DIV10DIV3
GNG12	GNG2	1.15228	0.727043	same	mmusculus	DIV10DIV3
GNG7	GNG2	2.37557	0.727043	same	mmusculus	DIV10DIV3
GNG5	GNG2	0.762205	0.727043	same	mmusculus	DIV10DIV3
GNG4	GNG2	1.60911	0.727043	same	mmusculus	DIV10DIV3
GNG3	GNG2	1.67828	0.727043	same	mmusculus	DIV10DIV3
PDPK1	PRKCD	0.628107	-1.20403	opposite	mmusculus	DIV10DIV3
PRKCQ	PRKCD	1.8966	-1.20403	opposite	mmusculus	DIV10DIV3
DDX51	DDX39	-1.31954	-0.687202	same	mmusculus	DIV10DIV3
EIF4A3	DDX39	-1.0349	-0.687202	same	mmusculus	DIV10DIV3
DDX59	DDX39	-0.72112	-0.687202	same	mmusculus	DIV10DIV3
DDX42	DDX39	-0.841147	-0.687202	same	mmusculus	DIV10DIV3
DDX41	DDX39	-0.976506	-0.687202	same	mmusculus	DIV10DIV3
DDX18	DDX39	-1.14439	-0.687202	same	mmusculus	DIV10DIV3
DDX21	DDX39	-1.43888	-0.687202	same	mmusculus	DIV10DIV3
DDX56	DDX39	-1.15707	-0.687202	same	mmusculus	DIV10DIV3
DDX47	DDX39	-1.00049	-0.687202	same	mmusculus	DIV10DIV3
DDX49	DDX39	-1.05203	-0.687202	same	mmusculus	DIV10DIV3
DDX10	DDX39	-0.762917	-0.687202	same	mmusculus	DIV10DIV3
DDX31	DDX39	-1.2847	-0.687202	same	mmusculus	DIV10DIV3
DDX54	DDX39	-1.24347	-0.687202	same	mmusculus	DIV10DIV3
DDX17	DDX39	-0.918006	-0.687202	same	mmusculus	DIV10DIV3
DDX55	DDX39	-1.06263	-0.687202	same	mmusculus	DIV10DIV3
DDX52	DDX39	-0.998226	-0.687202	same	mmusculus	DIV10DIV3
DDX50	DDX39	-1.07968	-0.687202	same	mmusculus	DIV10DIV3
DDX39B	DDX39	-0.607294	-0.687202	same	mmusculus	DIV10DIV3
DDX27	DDX39	-1.33668	-0.687202	same	mmusculus	DIV10DIV3
MPP6	CASK	0.657626	0.789574	same	mmusculus	DIV10DIV3
MPP1	CASK	1.05902	0.789574	same	mmusculus	DIV10DIV3
MPP2	CASK	1.43841	0.789574	same	mmusculus	DIV10DIV3
NAPG	NAPB	1.41359	0.893236	same	mmusculus	DIV10DIV3
CAMK2B	CAMKV	1.62736	1.43622	same	mmusculus	DIV10DIV3
PHKG2	CAMKV	0.66199	1.43622	same	mmusculus	DIV10DIV3
CAMK1	CAMKV	1.17746	1.43622	same	mmusculus	DIV10DIV3
DCLK1	CAMKV	1.0405	1.43622	same	mmusculus	DIV10DIV3
CAMKK1	CAMKV	0.79515	1.43622	same	mmusculus	DIV10DIV3
CAMK2A	CAMKV	2.41172	1.43622	same	mmusculus	DIV10DIV3
CAMKK2	CAMKV	1.34034	1.43622	same	mmusculus	DIV10DIV3
CAMK1D	CAMKV	1.53194	1.43622	same	mmusculus	DIV10DIV3
CAMK2D	CAMKV	1.99972	1.43622	same	mmusculus	DIV10DIV3
ATP1B3	ATP1B2	-0.955313	1.33591	opposite	mmusculus	DIV10DIV3
ATP1B1	ATP1B2	1.87722	1.33591	same	mmusculus	DIV10DIV3
PHF8	PHF2	-1.27424	-1.33939	same	mmusculus	DIV10DIV3
SLC2A1	SLC2A13	-0.61256	1.13812	opposite	mmusculus	DIV10DIV3
SLC2A3	SLC2A13	0.665169	1.13812	same	mmusculus	DIV10DIV3
SLC25A13	SLC25A14	-1.15742	-0.8502	same	mmusculus	DIV10DIV3
SLC25A12	SLC25A14	0.993716	-0.8502	opposite	mmusculus	DIV10DIV3
SLC25A18	SLC25A14	1.44432	-0.8502	opposite	mmusculus	DIV10DIV3
SLC25A51	SLC25A14	-0.616439	-0.8502	same	mmusculus	DIV10DIV3
SLC25A22	SLC25A14	1.10089	-0.8502	opposite	mmusculus	DIV10DIV3
SLC25A24	SLC25A14	-1.88679	-0.8502	same	mmusculus	DIV10DIV3
MYO16	MYO5A	0.999576	0.666763	same	mmusculus	DIV10DIV3
MYH14	MYO5A	2.0006	0.666763	same	mmusculus	DIV10DIV3
CCNT1	CCNL1	-1.65895	-1.32988	same	mmusculus	DIV10DIV3
SPATS2	SPATS2L	-0.700259	0.711487	opposite	mmusculus	DIV10DIV3
AP2A1	AP2A2	1.01031	0.63365	same	mmusculus	DIV10DIV3
SLTM	SAFB2	-1.58409	-1.25209	same	mmusculus	DIV10DIV3
SAFB	SAFB2	-1.17153	-1.25209	same	mmusculus	DIV10DIV3
MSN	RDX	-0.611004	-0.591536	same	mmusculus	DIV10DIV3
FRMD4A	RDX	0.725221	-0.591536	opposite	mmusculus	DIV10DIV3
CNTN3	NCAM2	1.07014	1.11305	same	mmusculus	DIV10DIV3
CNTN6	NCAM2	1.26179	1.11305	same	mmusculus	DIV10DIV3
NFASC	NCAM2	0.849798	1.11305	same	mmusculus	DIV10DIV3
NRCAM	NCAM2	0.86617	1.11305	same	mmusculus	DIV10DIV3
CHL1	NCAM2	1.1584	1.11305	same	mmusculus	DIV10DIV3
IGSF21	NCAM2	1.05548	1.11305	same	mmusculus	DIV10DIV3
CNTN2	NCAM2	-0.690733	1.11305	opposite	mmusculus	DIV10DIV3
CNTN5	NCAM2	1.12944	1.11305	same	mmusculus	DIV10DIV3
VCAM1	NCAM2	1.6122	1.11305	same	mmusculus	DIV10DIV3
CNTN1	NCAM2	1.35973	1.11305	same	mmusculus	DIV10DIV3
MYT1L	MYT1	-0.969433	-1.1523	same	mmusculus	DIV10DIV3
IRF2BPL	MYT1	-0.639885	-1.1523	same	mmusculus	DIV10DIV3
IRF2BP1	MYT1	-0.936509	-1.1523	same	mmusculus	DIV10DIV3
ZBTB18	ZBTB20	-1.28393	-1.73663	same	mmusculus	DIV10DIV3
ZFP281	ZBTB20	-0.798673	-1.73663	same	mmusculus	DIV10DIV3
ZFP148	ZBTB20	-1.07595	-1.73663	same	mmusculus	DIV10DIV3
ZFP91	ZBTB20	-1.52186	-1.73663	same	mmusculus	DIV10DIV3
FBXO42	HCFC1	0.808955	-0.856913	opposite	mmusculus	DIV10DIV3
NECTIN1	CADM1	1.34446	1.70519	same	mmusculus	DIV10DIV3
CADM3	CADM1	1.02081	1.70519	same	mmusculus	DIV10DIV3
TOR1AIP1	TOR1AIP2	-0.814638	-0.933122	same	mmusculus	DIV10DIV3
KIF1B	KIF2C	0.68121	-0.698534	opposite	mmusculus	DIV10DIV3
KIF2A	KIF2C	0.872232	-0.698534	opposite	mmusculus	DIV10DIV3
KIF26B	KIF2C	-0.811062	-0.698534	same	mmusculus	DIV10DIV3
KIFC1	KIF2C	-0.841904	-0.698534	same	mmusculus	DIV10DIV3
KIF5A	KIF2C	1.67202	-0.698534	opposite	mmusculus	DIV10DIV3
KIF3B	KIF2C	0.826704	-0.698534	opposite	mmusculus	DIV10DIV3
KIF23	KIF2C	-0.718923	-0.698534	same	mmusculus	DIV10DIV3
USP42	USP48	-1.51686	-0.652494	same	mmusculus	DIV10DIV3
USP15	USP48	0.586476	-0.652494	opposite	mmusculus	DIV10DIV3
USP34	USP48	-0.598375	-0.652494	same	mmusculus	DIV10DIV3
USP36	USP48	-1.02697	-0.652494	same	mmusculus	DIV10DIV3
USP14	USP48	0.621406	-0.652494	opposite	mmusculus	DIV10DIV3
USP13	USP48	1.14313	-0.652494	opposite	mmusculus	DIV10DIV3
USP3	USP48	-1.60401	-0.652494	same	mmusculus	DIV10DIV3
DLG4	DLG3	0.875156	0.800583	same	mmusculus	DIV10DIV3
DLG1	DLG3	0.717502	0.800583	same	mmusculus	DIV10DIV3
TOR1AIP2	TOR1AIP1	-0.933122	-0.814638	same	mmusculus	DIV10DIV3
CSTF2	RBMX2	-0.655755	-1.09487	same	mmusculus	DIV10DIV3
U2AF2	RBMX2	-0.878961	-1.09487	same	mmusculus	DIV10DIV3
EXT2	EXT1	-0.624958	-0.591143	same	mmusculus	DIV10DIV3
BCLAF1	BCLAF3	-1.37676	-0.850061	same	mmusculus	DIV10DIV3
THRAP3	BCLAF3	-1.47622	-0.850061	same	mmusculus	DIV10DIV3
HIPK2	CLK3	-1.23926	-0.879869	same	mmusculus	DIV10DIV3
PHF20L1	PHF20	-2.26217	-1.23656	same	mmusculus	DIV10DIV3
HNRNPUL2	HNRNPU	-0.738618	-1.00516	same	mmusculus	DIV10DIV3
HNRNPUL1	HNRNPU	-0.755494	-1.00516	same	mmusculus	DIV10DIV3
TPM3	TPM1	0.708862	1.03272	same	mmusculus	DIV10DIV3
PCLO	BSN	0.95181	0.731545	same	mmusculus	DIV10DIV3
CNTN3	CNTN1	1.07014	1.35973	same	mmusculus	DIV10DIV3
CNTN6	CNTN1	1.26179	1.35973	same	mmusculus	DIV10DIV3
NFASC	CNTN1	0.849798	1.35973	same	mmusculus	DIV10DIV3
NRCAM	CNTN1	0.86617	1.35973	same	mmusculus	DIV10DIV3
CHL1	CNTN1	1.1584	1.35973	same	mmusculus	DIV10DIV3
IGSF21	CNTN1	1.05548	1.35973	same	mmusculus	DIV10DIV3
CNTN2	CNTN1	-0.690733	1.35973	opposite	mmusculus	DIV10DIV3
NCAM2	CNTN1	1.11305	1.35973	same	mmusculus	DIV10DIV3
CNTN5	CNTN1	1.12944	1.35973	same	mmusculus	DIV10DIV3
VCAM1	CNTN1	1.6122	1.35973	same	mmusculus	DIV10DIV3
RFX1	RFX5	-1.77717	-0.838332	same	mmusculus	DIV10DIV3
SH3RF3	SH3GLB2	0.700037	1.07198	same	mmusculus	DIV10DIV3
SH3GLB1	SH3GLB2	1.37847	1.07198	same	mmusculus	DIV10DIV3
SH3GL2	SH3GLB2	1.52711	1.07198	same	mmusculus	DIV10DIV3
MORF4L1	MORF4L2	-1.11078	-1.19324	same	mmusculus	DIV10DIV3
MSL3	MORF4L2	-0.725344	-1.19324	same	mmusculus	DIV10DIV3
ALDH1B1	ALDH1L2	0.669216	-0.700947	opposite	mmusculus	DIV10DIV3
ALDH1L1	ALDH1L2	2.00128	-0.700947	opposite	mmusculus	DIV10DIV3
SAFB2	SAFB	-1.25209	-1.17153	same	mmusculus	DIV10DIV3
SLTM	SAFB	-1.58409	-1.17153	same	mmusculus	DIV10DIV3
FSD1L	FSD1	0.896427	0.912065	same	mmusculus	DIV10DIV3
MPP6	MPP1	0.657626	1.05902	same	mmusculus	DIV10DIV3
MPP2	MPP1	1.43841	1.05902	same	mmusculus	DIV10DIV3
CASK	MPP1	0.789574	1.05902	same	mmusculus	DIV10DIV3
STX1B	STX16	0.917652	0.690438	same	mmusculus	DIV10DIV3
STX1A	STX16	1.82526	0.690438	same	mmusculus	DIV10DIV3
RBMX2	CSTF2	-1.09487	-0.655755	same	mmusculus	DIV10DIV3
U2AF2	CSTF2	-0.878961	-0.655755	same	mmusculus	DIV10DIV3
ARFGEF2	CYTH3	0.61184	1.22788	same	mmusculus	DIV10DIV3
IQSEC3	CYTH3	1.12434	1.22788	same	mmusculus	DIV10DIV3
IQSEC1	CYTH3	1.08493	1.22788	same	mmusculus	DIV10DIV3
CYTH1	CYTH3	0.928429	1.22788	same	mmusculus	DIV10DIV3
PSD	CYTH3	0.630406	1.22788	same	mmusculus	DIV10DIV3
RGS17	RGS7	2.53544	2.82723	same	mmusculus	DIV10DIV3
RGS6	RGS7	1.31864	2.82723	same	mmusculus	DIV10DIV3
MFGE8	NRP1	1.97644	-0.590275	opposite	mmusculus	DIV10DIV3
NRXN3	NRP1	1.25745	-0.590275	opposite	mmusculus	DIV10DIV3
CNTNAP2	NRP1	1.0284	-0.590275	opposite	mmusculus	DIV10DIV3
NRXN1	NRP1	1.15001	-0.590275	opposite	mmusculus	DIV10DIV3
EDIL3	NRP1	0.71376	-0.590275	opposite	mmusculus	DIV10DIV3
DPYSL2	DPYSL5	0.93236	0.871038	same	mmusculus	DIV10DIV3
DPYSL3	DPYSL5	0.855641	0.871038	same	mmusculus	DIV10DIV3
CRMP1	DPYSL5	0.772554	0.871038	same	mmusculus	DIV10DIV3
SNX6	SNX8	0.624933	1.79397	same	mmusculus	DIV10DIV3
SNX7	SNX8	1.5911	1.79397	same	mmusculus	DIV10DIV3
SNX2	SNX8	0.905468	1.79397	same	mmusculus	DIV10DIV3
SNX4	SNX8	1.31183	1.79397	same	mmusculus	DIV10DIV3
SNX30	SNX8	1.62519	1.79397	same	mmusculus	DIV10DIV3
MINK1	PAK3	1.37538	0.86101	same	mmusculus	DIV10DIV3
STRADA	PAK3	0.679001	0.86101	same	mmusculus	DIV10DIV3
STK24	PAK3	0.588681	0.86101	same	mmusculus	DIV10DIV3
NCALD	KCNIP4	2.47416	0.821977	same	mmusculus	DIV10DIV3
VSNL1	KCNIP4	2.45794	0.821977	same	mmusculus	DIV10DIV3
HPCAL4	KCNIP4	1.39628	0.821977	same	mmusculus	DIV10DIV3
HPCA	KCNIP4	2.51884	0.821977	same	mmusculus	DIV10DIV3
HPCAL1	KCNIP4	1.61015	0.821977	same	mmusculus	DIV10DIV3
USP42	USP34	-1.51686	-0.598375	same	mmusculus	DIV10DIV3
USP48	USP34	-0.652494	-0.598375	same	mmusculus	DIV10DIV3
USP15	USP34	0.586476	-0.598375	opposite	mmusculus	DIV10DIV3
USP36	USP34	-1.02697	-0.598375	same	mmusculus	DIV10DIV3
USP14	USP34	0.621406	-0.598375	opposite	mmusculus	DIV10DIV3
USP13	USP34	1.14313	-0.598375	opposite	mmusculus	DIV10DIV3
USP3	USP34	-1.60401	-0.598375	same	mmusculus	DIV10DIV3
KIF1B	KIF26B	0.68121	-0.811062	opposite	mmusculus	DIV10DIV3
KIF2A	KIF26B	0.872232	-0.811062	opposite	mmusculus	DIV10DIV3
KIFC1	KIF26B	-0.841904	-0.811062	same	mmusculus	DIV10DIV3
KIF5A	KIF26B	1.67202	-0.811062	opposite	mmusculus	DIV10DIV3
KIF3B	KIF26B	0.826704	-0.811062	opposite	mmusculus	DIV10DIV3
KIF23	KIF26B	-0.718923	-0.811062	same	mmusculus	DIV10DIV3
KIF2C	KIF26B	-0.698534	-0.811062	same	mmusculus	DIV10DIV3
RRP1	RRP1B	-1.79157	-1.08337	same	mmusculus	DIV10DIV3
WIZ	ZFP687	-1.61871	-1.6848	same	mmusculus	DIV10DIV3
ZFP768	ZFP687	-1.36873	-1.6848	same	mmusculus	DIV10DIV3
ZFP57	ZFP687	-1.71703	-1.6848	same	mmusculus	DIV10DIV3
ZFP592	ZFP687	-1.10703	-1.6848	same	mmusculus	DIV10DIV3
PDE10A	PDE2A	0.6254	1.24419	same	mmusculus	DIV10DIV3
ATP2B4	ATP2B1	2.49408	1.2105	same	mmusculus	DIV10DIV3
ATP2B2	ATP2B1	1.17235	1.2105	same	mmusculus	DIV10DIV3
ATP1A1	ATP2B1	0.773993	1.2105	same	mmusculus	DIV10DIV3
ATP1A3	ATP2B1	1.32171	1.2105	same	mmusculus	DIV10DIV3
ATP1A2	ATP2B1	1.84301	1.2105	same	mmusculus	DIV10DIV3
CDH13	CDH4	1.11776	1.1501	same	mmusculus	DIV10DIV3
CDH11	CDH4	0.634819	1.1501	same	mmusculus	DIV10DIV3
CDH8	CDH4	0.762637	1.1501	same	mmusculus	DIV10DIV3
DDX51	DDX10	-1.31954	-0.762917	same	mmusculus	DIV10DIV3
EIF4A3	DDX10	-1.0349	-0.762917	same	mmusculus	DIV10DIV3
DDX59	DDX10	-0.72112	-0.762917	same	mmusculus	DIV10DIV3
DDX42	DDX10	-0.841147	-0.762917	same	mmusculus	DIV10DIV3
DDX41	DDX10	-0.976506	-0.762917	same	mmusculus	DIV10DIV3
DDX18	DDX10	-1.14439	-0.762917	same	mmusculus	DIV10DIV3
DDX21	DDX10	-1.43888	-0.762917	same	mmusculus	DIV10DIV3
DDX56	DDX10	-1.15707	-0.762917	same	mmusculus	DIV10DIV3
DDX47	DDX10	-1.00049	-0.762917	same	mmusculus	DIV10DIV3
DDX49	DDX10	-1.05203	-0.762917	same	mmusculus	DIV10DIV3
DDX31	DDX10	-1.2847	-0.762917	same	mmusculus	DIV10DIV3
DDX54	DDX10	-1.24347	-0.762917	same	mmusculus	DIV10DIV3
DDX17	DDX10	-0.918006	-0.762917	same	mmusculus	DIV10DIV3
DDX55	DDX10	-1.06263	-0.762917	same	mmusculus	DIV10DIV3
DDX52	DDX10	-0.998226	-0.762917	same	mmusculus	DIV10DIV3
DDX50	DDX10	-1.07968	-0.762917	same	mmusculus	DIV10DIV3
DDX39B	DDX10	-0.607294	-0.762917	same	mmusculus	DIV10DIV3
DDX39	DDX10	-0.687202	-0.762917	same	mmusculus	DIV10DIV3
DDX27	DDX10	-1.33668	-0.762917	same	mmusculus	DIV10DIV3
ZFP422	ZFP41	-1.82952	-2.59126	same	mmusculus	DIV10DIV3
GRM1	GRM5	1.24038	0.971951	same	mmusculus	DIV10DIV3
GRM7	GRM5	1.53626	0.971951	same	mmusculus	DIV10DIV3
GRM3	GRM5	0.968409	0.971951	same	mmusculus	DIV10DIV3
GRM2	GRM5	0.594996	0.971951	same	mmusculus	DIV10DIV3
AP2A2	AP2A1	0.63365	1.01031	same	mmusculus	DIV10DIV3
CXADR	JAM2	0.840231	0.632259	same	mmusculus	DIV10DIV3
CLMP	JAM2	0.655051	0.632259	same	mmusculus	DIV10DIV3
PLS1	LCP1	0.698229	-1.53356	opposite	mmusculus	DIV10DIV3
RBM27	RBM26	-0.676832	-0.644071	same	mmusculus	DIV10DIV3
MCM2	MCM6	-0.752759	-0.842374	same	mmusculus	DIV10DIV3
MCM3	MCM6	-0.777255	-0.842374	same	mmusculus	DIV10DIV3
RANBP1	RANBP3	1.03069	-0.632071	opposite	mmusculus	DIV10DIV3
RANBP2	RANBP3	-0.932569	-0.632071	same	mmusculus	DIV10DIV3
DGKB	DGKG	1.23779	0.683265	same	mmusculus	DIV10DIV3
USP48	USP42	-0.652494	-1.51686	same	mmusculus	DIV10DIV3
USP15	USP42	0.586476	-1.51686	opposite	mmusculus	DIV10DIV3
USP34	USP42	-0.598375	-1.51686	same	mmusculus	DIV10DIV3
USP36	USP42	-1.02697	-1.51686	same	mmusculus	DIV10DIV3
USP14	USP42	0.621406	-1.51686	opposite	mmusculus	DIV10DIV3
USP13	USP42	1.14313	-1.51686	opposite	mmusculus	DIV10DIV3
USP3	USP42	-1.60401	-1.51686	same	mmusculus	DIV10DIV3
NEBL	LASP1	1.19778	0.884132	same	mmusculus	DIV10DIV3
KPNA1	KPNA6	-0.62341	0.797595	opposite	mmusculus	DIV10DIV3
CBX1	CBX5	-1.24725	-1.0104	same	mmusculus	DIV10DIV3
CBX8	CBX5	-1.41344	-1.0104	same	mmusculus	DIV10DIV3
CBX4	CBX5	-0.589746	-1.0104	same	mmusculus	DIV10DIV3
CBX2	CBX5	-1.47831	-1.0104	same	mmusculus	DIV10DIV3
EHD1	EHD4	0.979073	1.66422	same	mmusculus	DIV10DIV3
ERH	GM10131	-1.02897	-1.02897	same	mmusculus	DIV10DIV3
HNRNPA2B1	HNRNPA1	-0.931961	-1.06854	same	mmusculus	DIV10DIV3
HNRNPAB	HNRNPA1	-1.53657	-1.06854	same	mmusculus	DIV10DIV3
RBM4B	HNRNPA1	-2.25259	-1.06854	same	mmusculus	DIV10DIV3
HNRNPD	HNRNPA1	-0.656835	-1.06854	same	mmusculus	DIV10DIV3
DAZAP1	HNRNPA1	-1.35649	-1.06854	same	mmusculus	DIV10DIV3
MSI1	HNRNPA1	-0.901776	-1.06854	same	mmusculus	DIV10DIV3
HNRNPA3	HNRNPA1	-0.681519	-1.06854	same	mmusculus	DIV10DIV3
HNRNPA0	HNRNPA1	-2.56571	-1.06854	same	mmusculus	DIV10DIV3
TIA1	HNRNPA1	-1.29589	-1.06854	same	mmusculus	DIV10DIV3
RBM39	HNRNPA1	-0.769526	-1.06854	same	mmusculus	DIV10DIV3
RBMX	HNRNPA1	-1.76124	-1.06854	same	mmusculus	DIV10DIV3
RBMXL1	HNRNPA1	-1.26163	-1.06854	same	mmusculus	DIV10DIV3
CIRBP	HNRNPA1	-1.16632	-1.06854	same	mmusculus	DIV10DIV3
EHMT1	KMT2A	-1.70214	-1.34478	same	mmusculus	DIV10DIV3
EHMT2	KMT2A	-1.9414	-1.34478	same	mmusculus	DIV10DIV3
KMT2D	KMT2A	-0.769247	-1.34478	same	mmusculus	DIV10DIV3
NSD2	KMT2A	-1.42136	-1.34478	same	mmusculus	DIV10DIV3
KMT2B	KMT2A	-2.27217	-1.34478	same	mmusculus	DIV10DIV3
EZH2	KMT2A	-1.40171	-1.34478	same	mmusculus	DIV10DIV3
SETD2	KMT2A	-1.096	-1.34478	same	mmusculus	DIV10DIV3
ACSBG1	ACSL6	2.1002	0.84564	same	mmusculus	DIV10DIV3
ACSL4	ACSL6	1.11408	0.84564	same	mmusculus	DIV10DIV3
ACSL1	ACSL6	1.13959	0.84564	same	mmusculus	DIV10DIV3
ACSL3	ACSL6	0.667747	0.84564	same	mmusculus	DIV10DIV3
HNRNPM	GM9833	-1.04632	-0.813846	same	mmusculus	DIV10DIV3
MYEF2	GM9833	-0.813846	-0.813846	same	mmusculus	DIV10DIV3
CAMK2B	CAMKK2	1.62736	1.34034	same	mmusculus	DIV10DIV3
CAMKV	CAMKK2	1.43622	1.34034	same	mmusculus	DIV10DIV3
PHKG2	CAMKK2	0.66199	1.34034	same	mmusculus	DIV10DIV3
CAMK1	CAMKK2	1.17746	1.34034	same	mmusculus	DIV10DIV3
DCLK1	CAMKK2	1.0405	1.34034	same	mmusculus	DIV10DIV3
CAMKK1	CAMKK2	0.79515	1.34034	same	mmusculus	DIV10DIV3
CAMK2A	CAMKK2	2.41172	1.34034	same	mmusculus	DIV10DIV3
CAMK1D	CAMKK2	1.53194	1.34034	same	mmusculus	DIV10DIV3
CAMK2D	CAMKK2	1.99972	1.34034	same	mmusculus	DIV10DIV3
SFSWAP	CLASRP	-1.23329	-0.92256	same	mmusculus	DIV10DIV3
TNPO1	IPO4	-0.763342	0.642721	opposite	mmusculus	DIV10DIV3
ITGAV	ITGA3	0.832522	0.72208	same	mmusculus	DIV10DIV3
ITGA6	ITGA3	0.581228	0.72208	same	mmusculus	DIV10DIV3
GM7879	PPIH	-0.657139	-0.657139	same	mmusculus	DIV10DIV3
PPWD1	PPIH	-1.08372	-0.657139	same	mmusculus	DIV10DIV3
PPIF	PPIH	-0.750633	-0.657139	same	mmusculus	DIV10DIV3
PPIL2	PPIH	-1.52913	-0.657139	same	mmusculus	DIV10DIV3
PPIL3	PPIH	-0.612669	-0.657139	same	mmusculus	DIV10DIV3
PPIA	PPIH	0.628919	-0.657139	opposite	mmusculus	DIV10DIV3
NKTR	PPIH	-0.988559	-0.657139	same	mmusculus	DIV10DIV3
CWC27	PPIH	-0.942093	-0.657139	same	mmusculus	DIV10DIV3
PPIG	PPIH	-0.629086	-0.657139	same	mmusculus	DIV10DIV3
PPIL4	PPIH	-1.1597	-0.657139	same	mmusculus	DIV10DIV3
PPIE	PPIH	-1.76506	-0.657139	same	mmusculus	DIV10DIV3
SNCA	SNCB	1.21181	1.27179	same	mmusculus	DIV10DIV3
LSAMP	NEGR1	1.07348	2.11781	same	mmusculus	DIV10DIV3
NTM	NEGR1	1.12129	2.11781	same	mmusculus	DIV10DIV3
DIRAS2	RALB	1.64502	1.4658	same	mmusculus	DIV10DIV3
MRAS	RALB	1.23986	1.4658	same	mmusculus	DIV10DIV3
KRAS	RALB	0.640414	1.4658	same	mmusculus	DIV10DIV3
RAP2B	RALB	0.613615	1.4658	same	mmusculus	DIV10DIV3
RALA	RALB	0.720643	1.4658	same	mmusculus	DIV10DIV3
NKIRAS2	RALB	0.688465	1.4658	same	mmusculus	DIV10DIV3
RAP1A	RALB	0.647331	1.4658	same	mmusculus	DIV10DIV3
DIRAS1	RALB	1.45921	1.4658	same	mmusculus	DIV10DIV3
RHEB	RALB	0.933074	1.4658	same	mmusculus	DIV10DIV3
ATAD2	NVL	-0.589952	-1.0607	same	mmusculus	DIV10DIV3
ZMAT2	ZFP385A	-2.25264	-0.982091	same	mmusculus	DIV10DIV3
ZFP346	ZFP385A	-0.674286	-0.982091	same	mmusculus	DIV10DIV3
NUPL1	GM49336	-0.768712	-0.768712	same	mmusculus	DIV10DIV3
QK	KHDRBS1	0.711182	-1.72247	opposite	mmusculus	DIV10DIV3
SF1	KHDRBS1	-0.713093	-1.72247	same	mmusculus	DIV10DIV3
KHDRBS2	KHDRBS1	-0.737098	-1.72247	same	mmusculus	DIV10DIV3
GM49336	NUPL1	-0.768712	-0.768712	same	mmusculus	DIV10DIV3
SLC38A3	SLC32A1	2.33014	2.51888	same	mmusculus	DIV10DIV3
SLC38A10	SLC32A1	-0.589924	2.51888	opposite	mmusculus	DIV10DIV3
SEMA4A	SEMA6D	1.11225	0.657167	same	mmusculus	DIV10DIV3
SEMA4G	SEMA6D	0.910589	0.657167	same	mmusculus	DIV10DIV3
SEMA4C	SEMA6D	-0.599347	0.657167	opposite	mmusculus	DIV10DIV3
SEMA4D	SEMA6D	0.787707	0.657167	same	mmusculus	DIV10DIV3
RUVBL2	RUVBL1	-0.97965	-0.6451	same	mmusculus	DIV10DIV3
PDGFRA	KIT	1.70428	1.22316	same	mmusculus	DIV10DIV3
EPHB3	KIT	0.767202	1.22316	same	mmusculus	DIV10DIV3
INSR	KIT	-0.818123	1.22316	opposite	mmusculus	DIV10DIV3
EGFR	KIT	0.819744	1.22316	same	mmusculus	DIV10DIV3
NTRK2	KIT	0.67519	1.22316	same	mmusculus	DIV10DIV3
CYFIP2	CYFIP1	0.707117	-0.705995	opposite	mmusculus	DIV10DIV3
LRFN1	SLITRK5	0.848951	0.587958	same	mmusculus	DIV10DIV3
SLIT3	SLITRK5	0.66967	0.587958	same	mmusculus	DIV10DIV3
LINGO1	SLITRK5	1.22383	0.587958	same	mmusculus	DIV10DIV3
LRFN2	SLITRK5	1.15804	0.587958	same	mmusculus	DIV10DIV3
LRFN4	SLITRK5	0.978451	0.587958	same	mmusculus	DIV10DIV3
LINGO2	SLITRK5	1.37234	0.587958	same	mmusculus	DIV10DIV3
SLIT1	SLITRK5	0.799167	0.587958	same	mmusculus	DIV10DIV3
DDX51	DDX27	-1.31954	-1.33668	same	mmusculus	DIV10DIV3
EIF4A3	DDX27	-1.0349	-1.33668	same	mmusculus	DIV10DIV3
DDX59	DDX27	-0.72112	-1.33668	same	mmusculus	DIV10DIV3
DDX42	DDX27	-0.841147	-1.33668	same	mmusculus	DIV10DIV3
DDX41	DDX27	-0.976506	-1.33668	same	mmusculus	DIV10DIV3
DDX18	DDX27	-1.14439	-1.33668	same	mmusculus	DIV10DIV3
DDX21	DDX27	-1.43888	-1.33668	same	mmusculus	DIV10DIV3
DDX56	DDX27	-1.15707	-1.33668	same	mmusculus	DIV10DIV3
DDX47	DDX27	-1.00049	-1.33668	same	mmusculus	DIV10DIV3
DDX49	DDX27	-1.05203	-1.33668	same	mmusculus	DIV10DIV3
DDX10	DDX27	-0.762917	-1.33668	same	mmusculus	DIV10DIV3
DDX31	DDX27	-1.2847	-1.33668	same	mmusculus	DIV10DIV3
DDX54	DDX27	-1.24347	-1.33668	same	mmusculus	DIV10DIV3
DDX17	DDX27	-0.918006	-1.33668	same	mmusculus	DIV10DIV3
DDX55	DDX27	-1.06263	-1.33668	same	mmusculus	DIV10DIV3
DDX52	DDX27	-0.998226	-1.33668	same	mmusculus	DIV10DIV3
DDX50	DDX27	-1.07968	-1.33668	same	mmusculus	DIV10DIV3
DDX39B	DDX27	-0.607294	-1.33668	same	mmusculus	DIV10DIV3
DDX39	DDX27	-0.687202	-1.33668	same	mmusculus	DIV10DIV3
FRMD5	EPB41L5	-1.55347	-0.956411	same	mmusculus	DIV10DIV3
PKIA	PKIG	1.15624	0.689528	same	mmusculus	DIV10DIV3
SNRNP40	TBL2	-1.0941	-0.688061	same	mmusculus	DIV10DIV3
WDR7	TBL2	1.17288	-0.688061	opposite	mmusculus	DIV10DIV3
PAFAH1B1	TBL2	0.803596	-0.688061	opposite	mmusculus	DIV10DIV3
WDR43	TBL2	-1.09518	-0.688061	same	mmusculus	DIV10DIV3
COP1	TBL2	-1.09556	-0.688061	same	mmusculus	DIV10DIV3
BCL7A	BCL7B	-1.38311	-0.758787	same	mmusculus	DIV10DIV3
NEK1	MAP2K1	0.770546	1.43275	same	mmusculus	DIV10DIV3
KDM6B	KDM6A	-1.48189	-0.608468	same	mmusculus	DIV10DIV3
RAI1	TCF20	-1.83407	-1.42318	same	mmusculus	DIV10DIV3
SORCS2	SORT1	1.49274	0.720901	same	mmusculus	DIV10DIV3
ZFP41	ZFP422	-2.59126	-1.82952	same	mmusculus	DIV10DIV3
RIMS2	RIMS4	-0.580585	0.959342	opposite	mmusculus	DIV10DIV3
USF2	USF1	-0.985132	-0.973324	same	mmusculus	DIV10DIV3
SREBF2	USF1	-0.592516	-0.973324	same	mmusculus	DIV10DIV3
SNX19	SNX25	1.41373	0.887164	same	mmusculus	DIV10DIV3
SNX14	SNX25	0.677599	0.887164	same	mmusculus	DIV10DIV3
YWHAZ	YWHAB	0.866938	0.900399	same	mmusculus	DIV10DIV3
YWHAH	YWHAB	1.02164	0.900399	same	mmusculus	DIV10DIV3
YWHAG	YWHAB	0.756767	0.900399	same	mmusculus	DIV10DIV3
AK1	AK5	1.58856	2.3767	same	mmusculus	DIV10DIV3
AK2	AK5	-1.04772	2.3767	opposite	mmusculus	DIV10DIV3
ZMYM4	ZMYM2	-0.589714	-1.38547	same	mmusculus	DIV10DIV3
RAP1GAP2	RAP1GAP	1.69977	1.53504	same	mmusculus	DIV10DIV3
GARNL3	RAP1GAP	1.70212	1.53504	same	mmusculus	DIV10DIV3
ANK1	ANK2	1.20322	1.71335	same	mmusculus	DIV10DIV3
EFTUD2	EEF1A1	-0.898579	-0.603117	same	mmusculus	DIV10DIV3
GSPT2	EEF1A1	1.38348	-0.603117	opposite	mmusculus	DIV10DIV3
EEF1A2	EEF1A1	1.51195	-0.603117	opposite	mmusculus	DIV10DIV3
MTMR9	MTMR6	1.36903	1.21238	same	mmusculus	DIV10DIV3
MTMR2	MTMR6	0.88184	1.21238	same	mmusculus	DIV10DIV3
SBF1	MTMR6	0.631076	1.21238	same	mmusculus	DIV10DIV3
MTMR7	MTMR6	1.0901	1.21238	same	mmusculus	DIV10DIV3
RCC2	RCBTB2	-1.6465	-0.913244	same	mmusculus	DIV10DIV3
ALS2	RCBTB2	0.624845	-0.913244	opposite	mmusculus	DIV10DIV3
RCC1	RCBTB2	-0.886316	-0.913244	same	mmusculus	DIV10DIV3
BRD2	BAZ1B	-0.786107	-1.36643	same	mmusculus	DIV10DIV3
BRD4	BAZ1B	-0.98869	-1.36643	same	mmusculus	DIV10DIV3
POLD1	POLA1	-1.10607	-0.847954	same	mmusculus	DIV10DIV3
NEXMIF	POLA1	-0.614903	-0.847954	same	mmusculus	DIV10DIV3
DNAJC8	GPALPP1	-0.972491	-1.11288	same	mmusculus	DIV10DIV3
PCYT2	PCYT1B	1.33803	1.18841	same	mmusculus	DIV10DIV3
PXK	SNX16	-0.808803	1.05172	opposite	mmusculus	DIV10DIV3
KIF1B	KIF5A	0.68121	1.67202	same	mmusculus	DIV10DIV3
KIF2A	KIF5A	0.872232	1.67202	same	mmusculus	DIV10DIV3
KIF26B	KIF5A	-0.811062	1.67202	opposite	mmusculus	DIV10DIV3
KIFC1	KIF5A	-0.841904	1.67202	opposite	mmusculus	DIV10DIV3
KIF3B	KIF5A	0.826704	1.67202	same	mmusculus	DIV10DIV3
KIF23	KIF5A	-0.718923	1.67202	opposite	mmusculus	DIV10DIV3
KIF2C	KIF5A	-0.698534	1.67202	opposite	mmusculus	DIV10DIV3
HECW2	UBE3B	1.54808	0.655325	same	mmusculus	DIV10DIV3
WWP1	UBE3B	0.881067	0.655325	same	mmusculus	DIV10DIV3
TRIP12	UBE3B	-0.984819	0.655325	opposite	mmusculus	DIV10DIV3
ELF2	GABPA	-0.674452	-0.59743	same	mmusculus	DIV10DIV3
SENP7	SENP6	-1.41491	-0.90446	same	mmusculus	DIV10DIV3
DDAH2	DDAH1	-0.873239	1.67495	opposite	mmusculus	DIV10DIV3
ADGRG1	ADGRL1	0.701135	0.793438	same	mmusculus	DIV10DIV3
ADGRL3	ADGRL1	0.975266	0.793438	same	mmusculus	DIV10DIV3
SYNGR3	SYNGR1	1.57085	1.69564	same	mmusculus	DIV10DIV3
TM7SF2	LBR	0.682903	-1.29888	opposite	mmusculus	DIV10DIV3
ITGAV	ITGA6	0.832522	0.581228	same	mmusculus	DIV10DIV3
ITGA3	ITGA6	0.72208	0.581228	same	mmusculus	DIV10DIV3
BSG	EMB	0.816562	0.657419	same	mmusculus	DIV10DIV3
ZFP260	ZFP637	-1.49901	-2.41002	same	mmusculus	DIV10DIV3
ZFP629	ZFP637	-1.12823	-2.41002	same	mmusculus	DIV10DIV3
ZFP354C	ZFP637	-2.16381	-2.41002	same	mmusculus	DIV10DIV3
SSB	LARP7	-0.9509	-0.583771	same	mmusculus	DIV10DIV3
HNRNPM	MYEF2	-1.04632	-0.813846	same	mmusculus	DIV10DIV3
GM9833	MYEF2	-0.813846	-0.813846	same	mmusculus	DIV10DIV3
PRKCG	PRKCE	1.39092	1.02585	same	mmusculus	DIV10DIV3
PRKCB	PRKCE	1.8315	1.02585	same	mmusculus	DIV10DIV3
PRKCZ	PRKCE	0.942601	1.02585	same	mmusculus	DIV10DIV3
PURB	PURA	0.935006	0.61019	same	mmusculus	DIV10DIV3
PURG	PURA	1.40577	0.61019	same	mmusculus	DIV10DIV3
ARAF	TESK1	0.951913	-0.712897	opposite	mmusculus	DIV10DIV3
ADCY9	GUCY1B1	0.792302	1.51379	same	mmusculus	DIV10DIV3
GUCY1A1	GUCY1B1	1.18296	1.51379	same	mmusculus	DIV10DIV3
ADCY1	GUCY1B1	1.58061	1.51379	same	mmusculus	DIV10DIV3
ADCY8	GUCY1B1	1.45674	1.51379	same	mmusculus	DIV10DIV3
ADCY3	GUCY1B1	0.974118	1.51379	same	mmusculus	DIV10DIV3
ADCY5	GUCY1B1	1.01768	1.51379	same	mmusculus	DIV10DIV3
HNRNPC	RALYL	-1.08496	-0.70473	same	mmusculus	DIV10DIV3
RALY	RALYL	-1.22286	-0.70473	same	mmusculus	DIV10DIV3
SOX4	SOX5	-1.87844	-1.4833	same	mmusculus	DIV10DIV3
SOX11	SOX5	-2.2324	-1.4833	same	mmusculus	DIV10DIV3
GPRASP2	ARMCX1	-0.730434	-0.898462	same	mmusculus	DIV10DIV3
ARMCX2	ARMCX1	-0.600249	-0.898462	same	mmusculus	DIV10DIV3
ARMC10	ARMCX1	-0.86095	-0.898462	same	mmusculus	DIV10DIV3
MAPRE2	MAPRE3	1.01213	1.29035	same	mmusculus	DIV10DIV3
MYT1L	IRF2BPL	-0.969433	-0.639885	same	mmusculus	DIV10DIV3
IRF2BP1	IRF2BPL	-0.936509	-0.639885	same	mmusculus	DIV10DIV3
MYT1	IRF2BPL	-1.1523	-0.639885	same	mmusculus	DIV10DIV3
SRSF3	RSRC2	-0.765729	-1.34382	same	mmusculus	DIV10DIV3
SRSF7	RSRC2	-1.01079	-1.34382	same	mmusculus	DIV10DIV3
SRSF1	RSRC2	-0.652343	-1.34382	same	mmusculus	DIV10DIV3
SRSF9	RSRC2	-0.903548	-1.34382	same	mmusculus	DIV10DIV3
SRSF6	RSRC2	-0.735089	-1.34382	same	mmusculus	DIV10DIV3
ADCY9	GUCY1A1	0.792302	1.18296	same	mmusculus	DIV10DIV3
ADCY1	GUCY1A1	1.58061	1.18296	same	mmusculus	DIV10DIV3
ADCY8	GUCY1A1	1.45674	1.18296	same	mmusculus	DIV10DIV3
ADCY3	GUCY1A1	0.974118	1.18296	same	mmusculus	DIV10DIV3
ADCY5	GUCY1A1	1.01768	1.18296	same	mmusculus	DIV10DIV3
GUCY1B1	GUCY1A1	1.51379	1.18296	same	mmusculus	DIV10DIV3
BAZ1B	BRD4	-1.36643	-0.98869	same	mmusculus	DIV10DIV3
BRD2	BRD4	-0.786107	-0.98869	same	mmusculus	DIV10DIV3
PRKACB	PRKACA	0.882685	1.09289	same	mmusculus	DIV10DIV3
CHTOP	POLDIP3	-1.2102	-1.07424	same	mmusculus	DIV10DIV3
ALYREF	POLDIP3	-1.12577	-1.07424	same	mmusculus	DIV10DIV3
PSMB6	PSMB2	-0.692281	-0.726289	same	mmusculus	DIV10DIV3
ZBTB14	FEZF2	-2.00771	-2.49331	same	mmusculus	DIV10DIV3
ZFP280D	FEZF2	-1.40043	-2.49331	same	mmusculus	DIV10DIV3
ZFP580	FEZF2	-1.34791	-2.49331	same	mmusculus	DIV10DIV3
ZFP280C	FEZF2	-1.13648	-2.49331	same	mmusculus	DIV10DIV3
ZBTB33	FEZF2	-1.41378	-2.49331	same	mmusculus	DIV10DIV3
MBTD1	SAMD1	-2.04728	-1.04887	same	mmusculus	DIV10DIV3
PHC2	SAMD1	-1.40886	-1.04887	same	mmusculus	DIV10DIV3
L3MBTL3	SAMD1	-0.941377	-1.04887	same	mmusculus	DIV10DIV3
DPP6	DPP8	1.541	0.811837	same	mmusculus	DIV10DIV3
FGD1	FARP1	0.584763	0.995751	same	mmusculus	DIV10DIV3
MINK1	STK24	1.37538	0.588681	same	mmusculus	DIV10DIV3
PAK3	STK24	0.86101	0.588681	same	mmusculus	DIV10DIV3
STRADA	STK24	0.679001	0.588681	same	mmusculus	DIV10DIV3
MID1	TRIM3	-0.94478	1.44513	opposite	mmusculus	DIV10DIV3
TRIM28	TRIM3	-1.25047	1.44513	opposite	mmusculus	DIV10DIV3
TRIM24	TRIM3	-0.861815	1.44513	opposite	mmusculus	DIV10DIV3
TRIM41	TRIM3	-0.634175	1.44513	opposite	mmusculus	DIV10DIV3
TRIM2	TRIM3	1.00148	1.44513	same	mmusculus	DIV10DIV3
ASAP1	APPL2	1.27301	1.53724	same	mmusculus	DIV10DIV3
AGFG2	APPL2	0.758681	1.53724	same	mmusculus	DIV10DIV3
AGAP2	APPL2	1.40804	1.53724	same	mmusculus	DIV10DIV3
NUP214	POM121	-0.780603	-0.640626	same	mmusculus	DIV10DIV3
YTHDF2	YTHDC1	-1.28451	-1.22411	same	mmusculus	DIV10DIV3
DHX15	DHX32	-1.37488	-0.844285	same	mmusculus	DIV10DIV3
DDX51	DDX52	-1.31954	-0.998226	same	mmusculus	DIV10DIV3
EIF4A3	DDX52	-1.0349	-0.998226	same	mmusculus	DIV10DIV3
DDX59	DDX52	-0.72112	-0.998226	same	mmusculus	DIV10DIV3
DDX42	DDX52	-0.841147	-0.998226	same	mmusculus	DIV10DIV3
DDX41	DDX52	-0.976506	-0.998226	same	mmusculus	DIV10DIV3
DDX18	DDX52	-1.14439	-0.998226	same	mmusculus	DIV10DIV3
DDX21	DDX52	-1.43888	-0.998226	same	mmusculus	DIV10DIV3
DDX56	DDX52	-1.15707	-0.998226	same	mmusculus	DIV10DIV3
DDX47	DDX52	-1.00049	-0.998226	same	mmusculus	DIV10DIV3
DDX49	DDX52	-1.05203	-0.998226	same	mmusculus	DIV10DIV3
DDX10	DDX52	-0.762917	-0.998226	same	mmusculus	DIV10DIV3
DDX31	DDX52	-1.2847	-0.998226	same	mmusculus	DIV10DIV3
DDX54	DDX52	-1.24347	-0.998226	same	mmusculus	DIV10DIV3
DDX17	DDX52	-0.918006	-0.998226	same	mmusculus	DIV10DIV3
DDX55	DDX52	-1.06263	-0.998226	same	mmusculus	DIV10DIV3
DDX50	DDX52	-1.07968	-0.998226	same	mmusculus	DIV10DIV3
DDX39B	DDX52	-0.607294	-0.998226	same	mmusculus	DIV10DIV3
DDX39	DDX52	-0.687202	-0.998226	same	mmusculus	DIV10DIV3
DDX27	DDX52	-1.33668	-0.998226	same	mmusculus	DIV10DIV3
PCBP1	PCBP3	-0.7054	0.987192	opposite	mmusculus	DIV10DIV3
FUBP1	PCBP3	-1.02671	0.987192	opposite	mmusculus	DIV10DIV3
KHSRP	PCBP3	-0.63237	0.987192	opposite	mmusculus	DIV10DIV3
IGF2BP2	PCBP3	-0.888217	0.987192	opposite	mmusculus	DIV10DIV3
IGF2BP3	PCBP3	-1.16162	0.987192	opposite	mmusculus	DIV10DIV3
HNRNPK	PCBP3	-0.620245	0.987192	opposite	mmusculus	DIV10DIV3
IGF2BP1	PCBP3	-1.71191	0.987192	opposite	mmusculus	DIV10DIV3
UNC5A	UNC5C	1.29018	0.980121	same	mmusculus	DIV10DIV3
UNC5D	UNC5C	1.08907	0.980121	same	mmusculus	DIV10DIV3
HMGB1	HMG20A	-0.987511	-1.5209	same	mmusculus	DIV10DIV3
HMG20B	HMG20A	-0.942249	-1.5209	same	mmusculus	DIV10DIV3
HMGB2	HMG20A	-0.999251	-1.5209	same	mmusculus	DIV10DIV3
TOX	HMG20A	-1.92757	-1.5209	same	mmusculus	DIV10DIV3
SMARCE1	HMG20A	-1.30519	-1.5209	same	mmusculus	DIV10DIV3
TOX4	HMG20A	-1.75404	-1.5209	same	mmusculus	DIV10DIV3
HMGB3	HMG20A	-0.698132	-1.5209	same	mmusculus	DIV10DIV3
POLA1	NEXMIF	-0.847954	-0.614903	same	mmusculus	DIV10DIV3
POLD1	NEXMIF	-1.10607	-0.614903	same	mmusculus	DIV10DIV3
BMPR2	ACVR1	0.58812	-0.963114	opposite	mmusculus	DIV10DIV3
SUN1	SUN2	-0.607149	-1.22363	same	mmusculus	DIV10DIV3
SRSF3	SRSF1	-0.765729	-0.652343	same	mmusculus	DIV10DIV3
SRSF7	SRSF1	-1.01079	-0.652343	same	mmusculus	DIV10DIV3
SRSF9	SRSF1	-0.903548	-0.652343	same	mmusculus	DIV10DIV3
SRSF6	SRSF1	-0.735089	-0.652343	same	mmusculus	DIV10DIV3
RSRC2	SRSF1	-1.34382	-0.652343	same	mmusculus	DIV10DIV3
PLXNA1	PLXNB1	1.1758	0.614657	same	mmusculus	DIV10DIV3
PLXND1	PLXNB1	1.34754	0.614657	same	mmusculus	DIV10DIV3
PLXNC1	PLXNB1	1.34149	0.614657	same	mmusculus	DIV10DIV3
PLXNA4	PLXNB1	0.694769	0.614657	same	mmusculus	DIV10DIV3
GNG7	GNG12	2.37557	1.15228	same	mmusculus	DIV10DIV3
GNG4	GNG12	1.60911	1.15228	same	mmusculus	DIV10DIV3
GNG2	GNG12	0.727043	1.15228	same	mmusculus	DIV10DIV3
GNG3	GNG12	1.67828	1.15228	same	mmusculus	DIV10DIV3
GNG5	GNG12	0.762205	1.15228	same	mmusculus	DIV10DIV3
RFX5	RFX1	-0.838332	-1.77717	same	mmusculus	DIV10DIV3
LRFN1	LINGO1	0.848951	1.22383	same	mmusculus	DIV10DIV3
SLITRK5	LINGO1	0.587958	1.22383	same	mmusculus	DIV10DIV3
SLIT3	LINGO1	0.66967	1.22383	same	mmusculus	DIV10DIV3
LRFN2	LINGO1	1.15804	1.22383	same	mmusculus	DIV10DIV3
LRFN4	LINGO1	0.978451	1.22383	same	mmusculus	DIV10DIV3
LINGO2	LINGO1	1.37234	1.22383	same	mmusculus	DIV10DIV3
SLIT1	LINGO1	0.799167	1.22383	same	mmusculus	DIV10DIV3
ZMYM2	ZMYM4	-1.38547	-0.589714	same	mmusculus	DIV10DIV3
ATP6V1B2	ATP6V1A	1.17583	1.2472	same	mmusculus	DIV10DIV3
SLC25A14	SLC25A18	-0.8502	1.44432	opposite	mmusculus	DIV10DIV3
SLC25A13	SLC25A18	-1.15742	1.44432	opposite	mmusculus	DIV10DIV3
SLC25A12	SLC25A18	0.993716	1.44432	same	mmusculus	DIV10DIV3
SLC25A51	SLC25A18	-0.616439	1.44432	opposite	mmusculus	DIV10DIV3
SLC25A22	SLC25A18	1.10089	1.44432	same	mmusculus	DIV10DIV3
SLC25A24	SLC25A18	-1.88679	1.44432	opposite	mmusculus	DIV10DIV3
RANBP9	GID8	0.898969	0.74507	same	mmusculus	DIV10DIV3
ARMCX1	ARMCX2	-0.898462	-0.600249	same	mmusculus	DIV10DIV3
GPRASP2	ARMCX2	-0.730434	-0.600249	same	mmusculus	DIV10DIV3
ARMC10	ARMCX2	-0.86095	-0.600249	same	mmusculus	DIV10DIV3
GNG4	GNG5	1.60911	0.762205	same	mmusculus	DIV10DIV3
GNG2	GNG5	0.727043	0.762205	same	mmusculus	DIV10DIV3
GNG3	GNG5	1.67828	0.762205	same	mmusculus	DIV10DIV3
GNG12	GNG5	1.15228	0.762205	same	mmusculus	DIV10DIV3
GNG7	GNG5	2.37557	0.762205	same	mmusculus	DIV10DIV3
FBXL16	FBXL20	1.05918	-0.838433	opposite	mmusculus	DIV10DIV3
WIZ	ZFP592	-1.61871	-1.10703	same	mmusculus	DIV10DIV3
ZFP768	ZFP592	-1.36873	-1.10703	same	mmusculus	DIV10DIV3
ZFP57	ZFP592	-1.71703	-1.10703	same	mmusculus	DIV10DIV3
ZFP687	ZFP592	-1.6848	-1.10703	same	mmusculus	DIV10DIV3
HMGB1	HMGB3	-0.987511	-0.698132	same	mmusculus	DIV10DIV3
HMG20B	HMGB3	-0.942249	-0.698132	same	mmusculus	DIV10DIV3
HMGB2	HMGB3	-0.999251	-0.698132	same	mmusculus	DIV10DIV3
TOX	HMGB3	-1.92757	-0.698132	same	mmusculus	DIV10DIV3
HMG20A	HMGB3	-1.5209	-0.698132	same	mmusculus	DIV10DIV3
SMARCE1	HMGB3	-1.30519	-0.698132	same	mmusculus	DIV10DIV3
TOX4	HMGB3	-1.75404	-0.698132	same	mmusculus	DIV10DIV3
PCBP1	KHSRP	-0.7054	-0.63237	same	mmusculus	DIV10DIV3
FUBP1	KHSRP	-1.02671	-0.63237	same	mmusculus	DIV10DIV3
IGF2BP2	KHSRP	-0.888217	-0.63237	same	mmusculus	DIV10DIV3
IGF2BP3	KHSRP	-1.16162	-0.63237	same	mmusculus	DIV10DIV3
HNRNPK	KHSRP	-0.620245	-0.63237	same	mmusculus	DIV10DIV3
PCBP3	KHSRP	0.987192	-0.63237	opposite	mmusculus	DIV10DIV3
IGF2BP1	KHSRP	-1.71191	-0.63237	same	mmusculus	DIV10DIV3
TPPP	TPPP3	1.05702	3.29978	same	mmusculus	DIV10DIV3
CCAR1	CCAR2	-0.801488	-1.17769	same	mmusculus	DIV10DIV3
SLC12A5	SLC12A7	1.61268	-1.14746	opposite	mmusculus	DIV10DIV3
SLC12A6	SLC12A7	1.47587	-1.14746	opposite	mmusculus	DIV10DIV3
MSH6	MSH2	-1.37658	-0.930622	same	mmusculus	DIV10DIV3
HOMER2	HOMER1	0.900953	1.08082	same	mmusculus	DIV10DIV3
HOMER3	HOMER1	-0.716957	1.08082	opposite	mmusculus	DIV10DIV3
SMARCC2	SMARCC1	-1.13047	-1.27949	same	mmusculus	DIV10DIV3
MYSM1	SMARCC1	-0.651821	-1.27949	same	mmusculus	DIV10DIV3
MSH2	MSH6	-0.930622	-1.37658	same	mmusculus	DIV10DIV3
ATL1	ATL2	0.607678	0.879772	same	mmusculus	DIV10DIV3
SRC	PTK2B	0.776411	1.86694	same	mmusculus	DIV10DIV3
FYN	PTK2B	0.662378	1.86694	same	mmusculus	DIV10DIV3
LYN	PTK2B	1.57585	1.86694	same	mmusculus	DIV10DIV3
RTN1	RTN3	1.25402	1.39677	same	mmusculus	DIV10DIV3
PRR18	RTN3	-1.10902	1.39677	opposite	mmusculus	DIV10DIV3
ATP2B4	ATP2B2	2.49408	1.17235	same	mmusculus	DIV10DIV3
ATP2B1	ATP2B2	1.2105	1.17235	same	mmusculus	DIV10DIV3
ATP1A1	ATP2B2	0.773993	1.17235	same	mmusculus	DIV10DIV3
ATP1A3	ATP2B2	1.32171	1.17235	same	mmusculus	DIV10DIV3
ATP1A2	ATP2B2	1.84301	1.17235	same	mmusculus	DIV10DIV3
PFKP	PFKM	1.21173	0.765258	same	mmusculus	DIV10DIV3
PRKACA	PRKACB	1.09289	0.882685	same	mmusculus	DIV10DIV3
GNL2	GNL3L	-1.46482	-0.669603	same	mmusculus	DIV10DIV3
LSG1	GNL3L	-0.833435	-0.669603	same	mmusculus	DIV10DIV3
KMT2A	SETD2	-1.34478	-1.096	same	mmusculus	DIV10DIV3
EHMT1	SETD2	-1.70214	-1.096	same	mmusculus	DIV10DIV3
EHMT2	SETD2	-1.9414	-1.096	same	mmusculus	DIV10DIV3
KMT2D	SETD2	-0.769247	-1.096	same	mmusculus	DIV10DIV3
NSD2	SETD2	-1.42136	-1.096	same	mmusculus	DIV10DIV3
KMT2B	SETD2	-2.27217	-1.096	same	mmusculus	DIV10DIV3
EZH2	SETD2	-1.40171	-1.096	same	mmusculus	DIV10DIV3
ZFP608	ZFP609	-0.851892	-1.11269	same	mmusculus	DIV10DIV3
PTBP3	HNRNPLL	-0.606851	-0.890694	same	mmusculus	DIV10DIV3
HNRNPL	HNRNPLL	-1.09678	-0.890694	same	mmusculus	DIV10DIV3
FARP1	FGD1	0.995751	0.584763	same	mmusculus	DIV10DIV3
SNX19	SNX14	1.41373	0.677599	same	mmusculus	DIV10DIV3
SNX25	SNX14	0.887164	0.677599	same	mmusculus	DIV10DIV3
SPTBN1	FLNA	1.58523	-0.924301	opposite	mmusculus	DIV10DIV3
SYNE2	FLNA	-1.68097	-0.924301	same	mmusculus	DIV10DIV3
SYNE1	FLNA	1.23709	-0.924301	opposite	mmusculus	DIV10DIV3
PLEC	FLNA	0.895815	-0.924301	opposite	mmusculus	DIV10DIV3
ACTN1	FLNA	0.663592	-0.924301	opposite	mmusculus	DIV10DIV3
FLNB	FLNA	-1.05224	-0.924301	same	mmusculus	DIV10DIV3
DSP	FLNA	-1.07846	-0.924301	same	mmusculus	DIV10DIV3
CLMN	FLNA	1.30785	-0.924301	opposite	mmusculus	DIV10DIV3
DTNA	FLNA	0.818778	-0.924301	opposite	mmusculus	DIV10DIV3
DMD	FLNA	0.662038	-0.924301	opposite	mmusculus	DIV10DIV3
MICAL1	FLNA	-1.2204	-0.924301	same	mmusculus	DIV10DIV3
SPTAN1	FLNA	1.20463	-0.924301	opposite	mmusculus	DIV10DIV3
FLNC	FLNA	-1.21964	-0.924301	same	mmusculus	DIV10DIV3
EP400	CHD9	-1.04471	-0.824631	same	mmusculus	DIV10DIV3
CHD8	CHD9	-1.21157	-0.824631	same	mmusculus	DIV10DIV3
SMARCA5	CHD9	-1.55376	-0.824631	same	mmusculus	DIV10DIV3
ATRX	CHD9	-0.827577	-0.824631	same	mmusculus	DIV10DIV3
SMARCA1	CHD9	-0.882996	-0.824631	same	mmusculus	DIV10DIV3
CHD1	CHD9	-1.06803	-0.824631	same	mmusculus	DIV10DIV3
INO80	CHD9	-1.10435	-0.824631	same	mmusculus	DIV10DIV3
SMARCA4	CHD9	-1.21147	-0.824631	same	mmusculus	DIV10DIV3
CHD4	CHD9	-1.21223	-0.824631	same	mmusculus	DIV10DIV3
CHD2	CHD9	-0.998261	-0.824631	same	mmusculus	DIV10DIV3
SYNGR1	SYNGR3	1.69564	1.57085	same	mmusculus	DIV10DIV3
KIF2A	KIF1B	0.872232	0.68121	same	mmusculus	DIV10DIV3
KIF26B	KIF1B	-0.811062	0.68121	opposite	mmusculus	DIV10DIV3
KIFC1	KIF1B	-0.841904	0.68121	opposite	mmusculus	DIV10DIV3
KIF5A	KIF1B	1.67202	0.68121	same	mmusculus	DIV10DIV3
KIF3B	KIF1B	0.826704	0.68121	same	mmusculus	DIV10DIV3
KIF23	KIF1B	-0.718923	0.68121	opposite	mmusculus	DIV10DIV3
KIF2C	KIF1B	-0.698534	0.68121	opposite	mmusculus	DIV10DIV3
TUBAL3	TUBB4A	0.705546	1.63932	same	mmusculus	DIV10DIV3
TUBA4A	TUBB4A	2.42748	1.63932	same	mmusculus	DIV10DIV3
TUBB6	TUBB4A	1.39808	1.63932	same	mmusculus	DIV10DIV3
TUBB3	TUBB4A	1.0142	1.63932	same	mmusculus	DIV10DIV3
TUBB5	TUBB4A	0.80471	1.63932	same	mmusculus	DIV10DIV3
TUBB2B	TUBB4A	0.906607	1.63932	same	mmusculus	DIV10DIV3
TUBB2A	TUBB4A	1.85831	1.63932	same	mmusculus	DIV10DIV3
NDRG1	NDRG3	1.28663	1.32087	same	mmusculus	DIV10DIV3
NDRG4	NDRG3	2.20261	1.32087	same	mmusculus	DIV10DIV3
NDRG2	NDRG3	1.348	1.32087	same	mmusculus	DIV10DIV3
CCNL1	CCNT1	-1.32988	-1.65895	same	mmusculus	DIV10DIV3
PHF2	PHF8	-1.33939	-1.27424	same	mmusculus	DIV10DIV3
STXBP2	STXBP3	-1.55874	0.772228	opposite	mmusculus	DIV10DIV3
VPS33A	STXBP3	0.632777	0.772228	same	mmusculus	DIV10DIV3
STXBP1	STXBP3	1.20404	0.772228	same	mmusculus	DIV10DIV3
SLC6A1	SLC6A11	1.95537	1.28671	same	mmusculus	DIV10DIV3
TTBK1	CSNK1G1	0.664741	0.682208	same	mmusculus	DIV10DIV3
CSNK1E	CSNK1G1	-0.872824	0.682208	opposite	mmusculus	DIV10DIV3
VRK1	CSNK1G1	-1.2601	0.682208	opposite	mmusculus	DIV10DIV3
CSNK1G3	CSNK1G1	1.05705	0.682208	same	mmusculus	DIV10DIV3
VRK2	CSNK1G1	-1.39385	0.682208	opposite	mmusculus	DIV10DIV3
MORF4L2	MORF4L1	-1.19324	-1.11078	same	mmusculus	DIV10DIV3
MSL3	MORF4L1	-0.725344	-1.11078	same	mmusculus	DIV10DIV3
KMT2A	KMT2D	-1.34478	-0.769247	same	mmusculus	DIV10DIV3
EHMT1	KMT2D	-1.70214	-0.769247	same	mmusculus	DIV10DIV3
EHMT2	KMT2D	-1.9414	-0.769247	same	mmusculus	DIV10DIV3
NSD2	KMT2D	-1.42136	-0.769247	same	mmusculus	DIV10DIV3
KMT2B	KMT2D	-2.27217	-0.769247	same	mmusculus	DIV10DIV3
EZH2	KMT2D	-1.40171	-0.769247	same	mmusculus	DIV10DIV3
SETD2	KMT2D	-1.096	-0.769247	same	mmusculus	DIV10DIV3
RAVER1	NONO	-0.915186	-1.11955	same	mmusculus	DIV10DIV3
GM38431	NONO	-0.915186	-1.11955	same	mmusculus	DIV10DIV3
RBM15B	NONO	-1.05034	-1.11955	same	mmusculus	DIV10DIV3
SFPQ	NONO	-1.10441	-1.11955	same	mmusculus	DIV10DIV3
SRSF3	SRSF7	-0.765729	-1.01079	same	mmusculus	DIV10DIV3
SRSF1	SRSF7	-0.652343	-1.01079	same	mmusculus	DIV10DIV3
SRSF9	SRSF7	-0.903548	-1.01079	same	mmusculus	DIV10DIV3
SRSF6	SRSF7	-0.735089	-1.01079	same	mmusculus	DIV10DIV3
RSRC2	SRSF7	-1.34382	-1.01079	same	mmusculus	DIV10DIV3
RALYL	RALY	-0.70473	-1.22286	same	mmusculus	DIV10DIV3
HNRNPC	RALY	-1.08496	-1.22286	same	mmusculus	DIV10DIV3
VPS13A	VPS13C	0.691648	0.888263	same	mmusculus	DIV10DIV3
SMC3	SMC1A	-1.18827	-1.26237	same	mmusculus	DIV10DIV3
SMC2	SMC1A	-0.74864	-1.26237	same	mmusculus	DIV10DIV3
SMC4	SMC1A	-0.737852	-1.26237	same	mmusculus	DIV10DIV3
ZFP553	CTCF	-2.32792	-1.9971	same	mmusculus	DIV10DIV3
ZFP574	CTCF	-0.99265	-1.9971	same	mmusculus	DIV10DIV3
ZFP827	CTCF	-1.08351	-1.9971	same	mmusculus	DIV10DIV3
ZFP771	CTCF	-0.778844	-1.9971	same	mmusculus	DIV10DIV3
STMN2	STMN4	0.724682	0.639139	same	mmusculus	DIV10DIV3
RAVER1	SFPQ	-0.915186	-1.10441	same	mmusculus	DIV10DIV3
GM38431	SFPQ	-0.915186	-1.10441	same	mmusculus	DIV10DIV3
RBM15B	SFPQ	-1.05034	-1.10441	same	mmusculus	DIV10DIV3
NONO	SFPQ	-1.11955	-1.10441	same	mmusculus	DIV10DIV3
RAPGEF2	RAPGEF4	0.763247	1.24577	same	mmusculus	DIV10DIV3
SOS2	RAPGEF4	0.927389	1.24577	same	mmusculus	DIV10DIV3
RALGPS1	RAPGEF4	1.09206	1.24577	same	mmusculus	DIV10DIV3
RASGRP2	RAPGEF4	1.37269	1.24577	same	mmusculus	DIV10DIV3
GNS	SULF2	0.835178	1.18994	same	mmusculus	DIV10DIV3
EIF4A3	DDX51	-1.0349	-1.31954	same	mmusculus	DIV10DIV3
DDX59	DDX51	-0.72112	-1.31954	same	mmusculus	DIV10DIV3
DDX42	DDX51	-0.841147	-1.31954	same	mmusculus	DIV10DIV3
DDX41	DDX51	-0.976506	-1.31954	same	mmusculus	DIV10DIV3
DDX18	DDX51	-1.14439	-1.31954	same	mmusculus	DIV10DIV3
DDX21	DDX51	-1.43888	-1.31954	same	mmusculus	DIV10DIV3
DDX56	DDX51	-1.15707	-1.31954	same	mmusculus	DIV10DIV3
DDX47	DDX51	-1.00049	-1.31954	same	mmusculus	DIV10DIV3
DDX49	DDX51	-1.05203	-1.31954	same	mmusculus	DIV10DIV3
DDX10	DDX51	-0.762917	-1.31954	same	mmusculus	DIV10DIV3
DDX31	DDX51	-1.2847	-1.31954	same	mmusculus	DIV10DIV3
DDX54	DDX51	-1.24347	-1.31954	same	mmusculus	DIV10DIV3
DDX17	DDX51	-0.918006	-1.31954	same	mmusculus	DIV10DIV3
DDX55	DDX51	-1.06263	-1.31954	same	mmusculus	DIV10DIV3
DDX52	DDX51	-0.998226	-1.31954	same	mmusculus	DIV10DIV3
DDX50	DDX51	-1.07968	-1.31954	same	mmusculus	DIV10DIV3
DDX39B	DDX51	-0.607294	-1.31954	same	mmusculus	DIV10DIV3
DDX39	DDX51	-0.687202	-1.31954	same	mmusculus	DIV10DIV3
DDX27	DDX51	-1.33668	-1.31954	same	mmusculus	DIV10DIV3
DPYSL3	DPYSL2	0.855641	0.93236	same	mmusculus	DIV10DIV3
CRMP1	DPYSL2	0.772554	0.93236	same	mmusculus	DIV10DIV3
DPYSL5	DPYSL2	0.871038	0.93236	same	mmusculus	DIV10DIV3
ACSL6	ACSBG1	0.84564	2.1002	same	mmusculus	DIV10DIV3
ACSL4	ACSBG1	1.11408	2.1002	same	mmusculus	DIV10DIV3
ACSL1	ACSBG1	1.13959	2.1002	same	mmusculus	DIV10DIV3
ACSL3	ACSBG1	0.667747	2.1002	same	mmusculus	DIV10DIV3
GPD1	GPD1L	1.35319	1.44027	same	mmusculus	DIV10DIV3
RBBP4	RBBP7	-1.57021	-0.756247	same	mmusculus	DIV10DIV3
OSBP2	OSBPL10	0.950337	0.818092	same	mmusculus	DIV10DIV3
OSBPL1A	OSBPL10	1.25919	0.818092	same	mmusculus	DIV10DIV3
SAFB2	SLTM	-1.25209	-1.58409	same	mmusculus	DIV10DIV3
SAFB	SLTM	-1.17153	-1.58409	same	mmusculus	DIV10DIV3
PPP2R2C	PPP2R2A	1.26479	0.597291	same	mmusculus	DIV10DIV3
PPP2R2D	PPP2R2A	0.783881	0.597291	same	mmusculus	DIV10DIV3
CRABP2	CRABP1	-1.10761	-0.873501	same	mmusculus	DIV10DIV3
FABP3	CRABP1	1.90707	-0.873501	opposite	mmusculus	DIV10DIV3
RBP1	CRABP1	-1.58087	-0.873501	same	mmusculus	DIV10DIV3
FABP7	CRABP1	0.973274	-0.873501	opposite	mmusculus	DIV10DIV3
AP2B1	AP3B2	0.602408	0.832062	same	mmusculus	DIV10DIV3
ADAM22	ADAM10	1.50029	-0.622678	opposite	mmusculus	DIV10DIV3
ADAM17	ADAM10	0.665518	-0.622678	opposite	mmusculus	DIV10DIV3
ADAM23	ADAM10	1.54962	-0.622678	opposite	mmusculus	DIV10DIV3
CHD8	EP400	-1.21157	-1.04471	same	mmusculus	DIV10DIV3
CHD9	EP400	-0.824631	-1.04471	same	mmusculus	DIV10DIV3
SMARCA5	EP400	-1.55376	-1.04471	same	mmusculus	DIV10DIV3
ATRX	EP400	-0.827577	-1.04471	same	mmusculus	DIV10DIV3
SMARCA1	EP400	-0.882996	-1.04471	same	mmusculus	DIV10DIV3
CHD1	EP400	-1.06803	-1.04471	same	mmusculus	DIV10DIV3
INO80	EP400	-1.10435	-1.04471	same	mmusculus	DIV10DIV3
SMARCA4	EP400	-1.21147	-1.04471	same	mmusculus	DIV10DIV3
CHD4	EP400	-1.21223	-1.04471	same	mmusculus	DIV10DIV3
CHD2	EP400	-0.998261	-1.04471	same	mmusculus	DIV10DIV3
RAB40C	RAB9B	-1.24165	1.40212	opposite	mmusculus	DIV10DIV3
RAB3D	RAB9B	0.648294	1.40212	same	mmusculus	DIV10DIV3
RAB3B	RAB9B	1.08809	1.40212	same	mmusculus	DIV10DIV3
RAB4B	RAB9B	0.930811	1.40212	same	mmusculus	DIV10DIV3
RAB6B	RAB9B	0.944791	1.40212	same	mmusculus	DIV10DIV3
RAB33A	RAB9B	0.77652	1.40212	same	mmusculus	DIV10DIV3
RAB9	RAB9B	1.03935	1.40212	same	mmusculus	DIV10DIV3
RAB3C	RAB9B	0.888138	1.40212	same	mmusculus	DIV10DIV3
RAB4A	RAB9B	1.05334	1.40212	same	mmusculus	DIV10DIV3
RAB36	RAB9B	1.16447	1.40212	same	mmusculus	DIV10DIV3
RAB3A	RAB9B	1.3075	1.40212	same	mmusculus	DIV10DIV3
RAB8B	RAB9B	-0.613733	1.40212	opposite	mmusculus	DIV10DIV3
RAB33B	RAB9B	0.752241	1.40212	same	mmusculus	DIV10DIV3
EFTUD2	EEF1A2	-0.898579	1.51195	opposite	mmusculus	DIV10DIV3
GSPT2	EEF1A2	1.38348	1.51195	same	mmusculus	DIV10DIV3
EEF1A1	EEF1A2	-0.603117	1.51195	opposite	mmusculus	DIV10DIV3
TBR1	EOMES	-1.60084	-2.13523	same	mmusculus	DIV10DIV3
PTK2B	SRC	1.86694	0.776411	same	mmusculus	DIV10DIV3
FYN	SRC	0.662378	0.776411	same	mmusculus	DIV10DIV3
LYN	SRC	1.57585	0.776411	same	mmusculus	DIV10DIV3
USF2	SREBF2	-0.985132	-0.592516	same	mmusculus	DIV10DIV3
USF1	SREBF2	-0.973324	-0.592516	same	mmusculus	DIV10DIV3
RAB40C	RAB9	-1.24165	1.03935	opposite	mmusculus	DIV10DIV3
RAB3D	RAB9	0.648294	1.03935	same	mmusculus	DIV10DIV3
RAB3B	RAB9	1.08809	1.03935	same	mmusculus	DIV10DIV3
RAB4B	RAB9	0.930811	1.03935	same	mmusculus	DIV10DIV3
RAB6B	RAB9	0.944791	1.03935	same	mmusculus	DIV10DIV3
RAB33A	RAB9	0.77652	1.03935	same	mmusculus	DIV10DIV3
RAB3C	RAB9	0.888138	1.03935	same	mmusculus	DIV10DIV3
RAB4A	RAB9	1.05334	1.03935	same	mmusculus	DIV10DIV3
RAB36	RAB9	1.16447	1.03935	same	mmusculus	DIV10DIV3
RAB3A	RAB9	1.3075	1.03935	same	mmusculus	DIV10DIV3
RAB8B	RAB9	-0.613733	1.03935	opposite	mmusculus	DIV10DIV3
RAB33B	RAB9	0.752241	1.03935	same	mmusculus	DIV10DIV3
RAB9B	RAB9	1.40212	1.03935	same	mmusculus	DIV10DIV3
TCF3	TCF12	-1.55402	-1.58018	same	mmusculus	DIV10DIV3
TCF4	TCF12	-1.85609	-1.58018	same	mmusculus	DIV10DIV3
MORF4L1	MSL3	-1.11078	-0.725344	same	mmusculus	DIV10DIV3
MORF4L2	MSL3	-1.19324	-0.725344	same	mmusculus	DIV10DIV3
MTMR9	SBF1	1.36903	0.631076	same	mmusculus	DIV10DIV3
MTMR2	SBF1	0.88184	0.631076	same	mmusculus	DIV10DIV3
MTMR6	SBF1	1.21238	0.631076	same	mmusculus	DIV10DIV3
MTMR7	SBF1	1.0901	0.631076	same	mmusculus	DIV10DIV3
TRIM3	MID1	1.44513	-0.94478	opposite	mmusculus	DIV10DIV3
TRIM28	MID1	-1.25047	-0.94478	same	mmusculus	DIV10DIV3
TRIM24	MID1	-0.861815	-0.94478	same	mmusculus	DIV10DIV3
TRIM41	MID1	-0.634175	-0.94478	same	mmusculus	DIV10DIV3
TRIM2	MID1	1.00148	-0.94478	opposite	mmusculus	DIV10DIV3
ZBTB14	ZFP280D	-2.00771	-1.40043	same	mmusculus	DIV10DIV3
ZFP580	ZFP280D	-1.34791	-1.40043	same	mmusculus	DIV10DIV3
ZFP280C	ZFP280D	-1.13648	-1.40043	same	mmusculus	DIV10DIV3
ZBTB33	ZFP280D	-1.41378	-1.40043	same	mmusculus	DIV10DIV3
FEZF2	ZFP280D	-2.49331	-1.40043	same	mmusculus	DIV10DIV3
SHANK2	SHANK3	1.031	1.5262	same	mmusculus	DIV10DIV3
SHANK1	SHANK3	0.841479	1.5262	same	mmusculus	DIV10DIV3
TFIP11	ZGPAT	-0.846897	-0.596762	same	mmusculus	DIV10DIV3
UCHL1	UCHL3	0.602003	0.618635	same	mmusculus	DIV10DIV3
KIF1B	KIF23	0.68121	-0.718923	opposite	mmusculus	DIV10DIV3
KIF2A	KIF23	0.872232	-0.718923	opposite	mmusculus	DIV10DIV3
KIF26B	KIF23	-0.811062	-0.718923	same	mmusculus	DIV10DIV3
KIFC1	KIF23	-0.841904	-0.718923	same	mmusculus	DIV10DIV3
KIF5A	KIF23	1.67202	-0.718923	opposite	mmusculus	DIV10DIV3
KIF3B	KIF23	0.826704	-0.718923	opposite	mmusculus	DIV10DIV3
KIF2C	KIF23	-0.698534	-0.718923	same	mmusculus	DIV10DIV3
ANP32B	ANP32A	-1.01813	-0.949402	same	mmusculus	DIV10DIV3
XAB2	PRPF6	-1.07781	-1.22995	same	mmusculus	DIV10DIV3
CRNKL1	PRPF6	-1.51135	-1.22995	same	mmusculus	DIV10DIV3
DDX51	DDX17	-1.31954	-0.918006	same	mmusculus	DIV10DIV3
EIF4A3	DDX17	-1.0349	-0.918006	same	mmusculus	DIV10DIV3
DDX59	DDX17	-0.72112	-0.918006	same	mmusculus	DIV10DIV3
DDX42	DDX17	-0.841147	-0.918006	same	mmusculus	DIV10DIV3
DDX41	DDX17	-0.976506	-0.918006	same	mmusculus	DIV10DIV3
DDX18	DDX17	-1.14439	-0.918006	same	mmusculus	DIV10DIV3
DDX21	DDX17	-1.43888	-0.918006	same	mmusculus	DIV10DIV3
DDX56	DDX17	-1.15707	-0.918006	same	mmusculus	DIV10DIV3
DDX47	DDX17	-1.00049	-0.918006	same	mmusculus	DIV10DIV3
DDX49	DDX17	-1.05203	-0.918006	same	mmusculus	DIV10DIV3
DDX10	DDX17	-0.762917	-0.918006	same	mmusculus	DIV10DIV3
DDX31	DDX17	-1.2847	-0.918006	same	mmusculus	DIV10DIV3
DDX54	DDX17	-1.24347	-0.918006	same	mmusculus	DIV10DIV3
DDX55	DDX17	-1.06263	-0.918006	same	mmusculus	DIV10DIV3
DDX52	DDX17	-0.998226	-0.918006	same	mmusculus	DIV10DIV3
DDX50	DDX17	-1.07968	-0.918006	same	mmusculus	DIV10DIV3
DDX39B	DDX17	-0.607294	-0.918006	same	mmusculus	DIV10DIV3
DDX39	DDX17	-0.687202	-0.918006	same	mmusculus	DIV10DIV3
DDX27	DDX17	-1.33668	-0.918006	same	mmusculus	DIV10DIV3
NHP2	RSL1D1	-0.962549	-1.49505	same	mmusculus	DIV10DIV3
ZCCHC7	CNBP	-1.88226	-1.55338	same	mmusculus	DIV10DIV3
MICU3	MICU2	1.05439	0.89365	same	mmusculus	DIV10DIV3
FKBP3	TTC9B	0.672023	0.721639	same	mmusculus	DIV10DIV3
TTC9C	TTC9B	-0.666589	0.721639	opposite	mmusculus	DIV10DIV3
FKBP1B	TTC9B	1.80514	0.721639	same	mmusculus	DIV10DIV3
FKBP1A	TTC9B	1.03023	0.721639	same	mmusculus	DIV10DIV3
RIOK2	RIOK1	-1.30361	-1.09345	same	mmusculus	DIV10DIV3
ADCY9	ADCY8	0.792302	1.45674	same	mmusculus	DIV10DIV3
GUCY1A1	ADCY8	1.18296	1.45674	same	mmusculus	DIV10DIV3
ADCY1	ADCY8	1.58061	1.45674	same	mmusculus	DIV10DIV3
ADCY3	ADCY8	0.974118	1.45674	same	mmusculus	DIV10DIV3
ADCY5	ADCY8	1.01768	1.45674	same	mmusculus	DIV10DIV3
GUCY1B1	ADCY8	1.51379	1.45674	same	mmusculus	DIV10DIV3
PTK2B	FYN	1.86694	0.662378	same	mmusculus	DIV10DIV3
SRC	FYN	0.776411	0.662378	same	mmusculus	DIV10DIV3
LYN	FYN	1.57585	0.662378	same	mmusculus	DIV10DIV3
RDX	MSN	-0.591536	-0.611004	same	mmusculus	DIV10DIV3
FRMD4A	MSN	0.725221	-0.611004	opposite	mmusculus	DIV10DIV3
SH3GLB1	SH3RF3	1.37847	0.700037	same	mmusculus	DIV10DIV3
SH3GLB2	SH3RF3	1.07198	0.700037	same	mmusculus	DIV10DIV3
SH3GL2	SH3RF3	1.52711	0.700037	same	mmusculus	DIV10DIV3
PGAM1	BPGM	0.822452	0.680104	same	mmusculus	DIV10DIV3
EP400	SMARCA4	-1.04471	-1.21147	same	mmusculus	DIV10DIV3
CHD8	SMARCA4	-1.21157	-1.21147	same	mmusculus	DIV10DIV3
CHD9	SMARCA4	-0.824631	-1.21147	same	mmusculus	DIV10DIV3
SMARCA5	SMARCA4	-1.55376	-1.21147	same	mmusculus	DIV10DIV3
ATRX	SMARCA4	-0.827577	-1.21147	same	mmusculus	DIV10DIV3
SMARCA1	SMARCA4	-0.882996	-1.21147	same	mmusculus	DIV10DIV3
CHD1	SMARCA4	-1.06803	-1.21147	same	mmusculus	DIV10DIV3
INO80	SMARCA4	-1.10435	-1.21147	same	mmusculus	DIV10DIV3
CHD4	SMARCA4	-1.21223	-1.21147	same	mmusculus	DIV10DIV3
CHD2	SMARCA4	-0.998261	-1.21147	same	mmusculus	DIV10DIV3
RCOR1	RCOR2	-0.809792	-1.26124	same	mmusculus	DIV10DIV3
SNX6	SNX7	0.624933	1.5911	same	mmusculus	DIV10DIV3
SNX2	SNX7	0.905468	1.5911	same	mmusculus	DIV10DIV3
SNX8	SNX7	1.79397	1.5911	same	mmusculus	DIV10DIV3
SNX4	SNX7	1.31183	1.5911	same	mmusculus	DIV10DIV3
SNX30	SNX7	1.62519	1.5911	same	mmusculus	DIV10DIV3
DNAJB12	DNAJB4	-0.642071	0.650576	opposite	mmusculus	DIV10DIV3
ERC2	ERC1	1.7844	0.584045	same	mmusculus	DIV10DIV3
NCOA1	NCOA2	-0.633296	-0.807651	same	mmusculus	DIV10DIV3
MAP1LC3A	GABARAPL2	0.742001	1.67155	same	mmusculus	DIV10DIV3
PTPRZ1	PTPRA	0.715479	0.693595	same	mmusculus	DIV10DIV3
PTPN2	PTPRA	-0.855354	0.693595	opposite	mmusculus	DIV10DIV3
PTPRN2	PTPRA	1.40545	0.693595	same	mmusculus	DIV10DIV3
PTPRF	PTPRA	0.959329	0.693595	same	mmusculus	DIV10DIV3
PTPRS	PTPRA	0.940397	0.693595	same	mmusculus	DIV10DIV3
PTPRD	PTPRA	1.0235	0.693595	same	mmusculus	DIV10DIV3
PTPRT	PTPRA	0.734897	0.693595	same	mmusculus	DIV10DIV3
PTPRE	PTPRA	1.67223	0.693595	same	mmusculus	DIV10DIV3
RAPGEF4	RALGPS1	1.24577	1.09206	same	mmusculus	DIV10DIV3
RAPGEF2	RALGPS1	0.763247	1.09206	same	mmusculus	DIV10DIV3
SOS2	RALGPS1	0.927389	1.09206	same	mmusculus	DIV10DIV3
RASGRP2	RALGPS1	1.37269	1.09206	same	mmusculus	DIV10DIV3
HNRNPH1	RBM12	-0.660128	-0.607281	same	mmusculus	DIV10DIV3
KIF1B	KIF3B	0.68121	0.826704	same	mmusculus	DIV10DIV3
KIF2A	KIF3B	0.872232	0.826704	same	mmusculus	DIV10DIV3
KIF26B	KIF3B	-0.811062	0.826704	opposite	mmusculus	DIV10DIV3
KIFC1	KIF3B	-0.841904	0.826704	opposite	mmusculus	DIV10DIV3
KIF5A	KIF3B	1.67202	0.826704	same	mmusculus	DIV10DIV3
KIF23	KIF3B	-0.718923	0.826704	opposite	mmusculus	DIV10DIV3
KIF2C	KIF3B	-0.698534	0.826704	opposite	mmusculus	DIV10DIV3
TTBK1	CSNK1E	0.664741	-0.872824	opposite	mmusculus	DIV10DIV3
VRK1	CSNK1E	-1.2601	-0.872824	same	mmusculus	DIV10DIV3
CSNK1G1	CSNK1E	0.682208	-0.872824	opposite	mmusculus	DIV10DIV3
CSNK1G3	CSNK1E	1.05705	-0.872824	opposite	mmusculus	DIV10DIV3
VRK2	CSNK1E	-1.39385	-0.872824	same	mmusculus	DIV10DIV3
CPNE8	CPNE4	2.33495	1.75681	same	mmusculus	DIV10DIV3
CPNE5	CPNE4	1.81489	1.75681	same	mmusculus	DIV10DIV3
CPNE7	CPNE4	1.85384	1.75681	same	mmusculus	DIV10DIV3
CPNE2	CPNE4	1.8854	1.75681	same	mmusculus	DIV10DIV3
SEMA4A	SEMA4C	1.11225	-0.599347	opposite	mmusculus	DIV10DIV3
SEMA4G	SEMA4C	0.910589	-0.599347	opposite	mmusculus	DIV10DIV3
SEMA4D	SEMA4C	0.787707	-0.599347	opposite	mmusculus	DIV10DIV3
SEMA6D	SEMA4C	0.657167	-0.599347	opposite	mmusculus	DIV10DIV3
STXBP2	STXBP1	-1.55874	1.20404	opposite	mmusculus	DIV10DIV3
STXBP3	STXBP1	0.772228	1.20404	same	mmusculus	DIV10DIV3
VPS33A	STXBP1	0.632777	1.20404	same	mmusculus	DIV10DIV3
SNX6	SNX4	0.624933	1.31183	same	mmusculus	DIV10DIV3
SNX7	SNX4	1.5911	1.31183	same	mmusculus	DIV10DIV3
SNX2	SNX4	0.905468	1.31183	same	mmusculus	DIV10DIV3
SNX8	SNX4	1.79397	1.31183	same	mmusculus	DIV10DIV3
SNX30	SNX4	1.62519	1.31183	same	mmusculus	DIV10DIV3
ICE1	PAFAH1B3	-0.77751	-0.729695	same	mmusculus	DIV10DIV3
PPWD1	PPIG	-1.08372	-0.629086	same	mmusculus	DIV10DIV3
PPIF	PPIG	-0.750633	-0.629086	same	mmusculus	DIV10DIV3
PPIL2	PPIG	-1.52913	-0.629086	same	mmusculus	DIV10DIV3
PPIL3	PPIG	-0.612669	-0.629086	same	mmusculus	DIV10DIV3
PPIA	PPIG	0.628919	-0.629086	opposite	mmusculus	DIV10DIV3
NKTR	PPIG	-0.988559	-0.629086	same	mmusculus	DIV10DIV3
CWC27	PPIG	-0.942093	-0.629086	same	mmusculus	DIV10DIV3
PPIL4	PPIG	-1.1597	-0.629086	same	mmusculus	DIV10DIV3
PPIE	PPIG	-1.76506	-0.629086	same	mmusculus	DIV10DIV3
PPIH	PPIG	-0.657139	-0.629086	same	mmusculus	DIV10DIV3
GM7879	PPIG	-0.657139	-0.629086	same	mmusculus	DIV10DIV3
MTMR2	MTMR9	0.88184	1.36903	same	mmusculus	DIV10DIV3
SBF1	MTMR9	0.631076	1.36903	same	mmusculus	DIV10DIV3
MTMR6	MTMR9	1.21238	1.36903	same	mmusculus	DIV10DIV3
MTMR7	MTMR9	1.0901	1.36903	same	mmusculus	DIV10DIV3
HDAC11	HDAC1	0.936526	-1.70856	opposite	mmusculus	DIV10DIV3
HDAC6	HDAC1	-0.720561	-1.70856	same	mmusculus	DIV10DIV3
CDK2	CDK11B	-0.845672	-0.98161	same	mmusculus	DIV10DIV3
CDK12	CDK11B	-0.586682	-0.98161	same	mmusculus	DIV10DIV3
PRPF4B	CDK11B	-0.884275	-0.98161	same	mmusculus	DIV10DIV3
CDK13	CDK11B	-0.776953	-0.98161	same	mmusculus	DIV10DIV3
CDK9	CDK11B	-0.726165	-0.98161	same	mmusculus	DIV10DIV3
CDK1	CDK11B	-1.04162	-0.98161	same	mmusculus	DIV10DIV3
CDK16	CDK11B	0.945474	-0.98161	opposite	mmusculus	DIV10DIV3
CDK7	CDK11B	-0.97012	-0.98161	same	mmusculus	DIV10DIV3
STXBP2	VPS33A	-1.55874	0.632777	opposite	mmusculus	DIV10DIV3
STXBP3	VPS33A	0.772228	0.632777	same	mmusculus	DIV10DIV3
STXBP1	VPS33A	1.20404	0.632777	same	mmusculus	DIV10DIV3
PSMB2	PSMB6	-0.726289	-0.692281	same	mmusculus	DIV10DIV3
ATP1B3	ATP1B1	-0.955313	1.87722	opposite	mmusculus	DIV10DIV3
ATP1B2	ATP1B1	1.33591	1.87722	same	mmusculus	DIV10DIV3
CBLN1	CBLN4	1.114	1.57423	same	mmusculus	DIV10DIV3
ZBTB18	ZFP148	-1.28393	-1.07595	same	mmusculus	DIV10DIV3
ZBTB20	ZFP148	-1.73663	-1.07595	same	mmusculus	DIV10DIV3
ZFP281	ZFP148	-0.798673	-1.07595	same	mmusculus	DIV10DIV3
ZFP91	ZFP148	-1.52186	-1.07595	same	mmusculus	DIV10DIV3
RPRD2	RPRD1B	-1.07999	-0.785186	same	mmusculus	DIV10DIV3
SMC1A	SMC3	-1.26237	-1.18827	same	mmusculus	DIV10DIV3
SMC2	SMC3	-0.74864	-1.18827	same	mmusculus	DIV10DIV3
SMC4	SMC3	-0.737852	-1.18827	same	mmusculus	DIV10DIV3
SP3	SP1	-1.49121	-0.912973	same	mmusculus	DIV10DIV3
GM10282	HMGN1	-2.90983	-2.78414	same	mmusculus	DIV10DIV3
HMGN2	HMGN1	-2.90983	-2.78414	same	mmusculus	DIV10DIV3
RAPGEF4	RAPGEF2	1.24577	0.763247	same	mmusculus	DIV10DIV3
SOS2	RAPGEF2	0.927389	0.763247	same	mmusculus	DIV10DIV3
RALGPS1	RAPGEF2	1.09206	0.763247	same	mmusculus	DIV10DIV3
RASGRP2	RAPGEF2	1.37269	0.763247	same	mmusculus	DIV10DIV3
PTPRA	PTPRT	0.693595	0.734897	same	mmusculus	DIV10DIV3
PTPRZ1	PTPRT	0.715479	0.734897	same	mmusculus	DIV10DIV3
PTPN2	PTPRT	-0.855354	0.734897	opposite	mmusculus	DIV10DIV3
PTPRN2	PTPRT	1.40545	0.734897	same	mmusculus	DIV10DIV3
PTPRF	PTPRT	0.959329	0.734897	same	mmusculus	DIV10DIV3
PTPRS	PTPRT	0.940397	0.734897	same	mmusculus	DIV10DIV3
PTPRD	PTPRT	1.0235	0.734897	same	mmusculus	DIV10DIV3
PTPRE	PTPRT	1.67223	0.734897	same	mmusculus	DIV10DIV3
EMB	BSG	0.657419	0.816562	same	mmusculus	DIV10DIV3
CHTOP	ALYREF	-1.2102	-1.12577	same	mmusculus	DIV10DIV3
POLDIP3	ALYREF	-1.07424	-1.12577	same	mmusculus	DIV10DIV3
ACAA2	ACAT2	0.589841	1.16494	same	mmusculus	DIV10DIV3
CARMIL1	CARMIL3	0.883375	0.609587	same	mmusculus	DIV10DIV3
RNH1	CARMIL3	-0.673836	0.609587	opposite	mmusculus	DIV10DIV3
PLXND1	PLXNC1	1.34754	1.34149	same	mmusculus	DIV10DIV3
PLXNA1	PLXNC1	1.1758	1.34149	same	mmusculus	DIV10DIV3
PLXNB1	PLXNC1	0.614657	1.34149	same	mmusculus	DIV10DIV3
PLXNA4	PLXNC1	0.694769	1.34149	same	mmusculus	DIV10DIV3
MAST4	STK32C	-0.719755	1.86829	opposite	mmusculus	DIV10DIV3
MAST1	STK32C	0.600187	1.86829	same	mmusculus	DIV10DIV3
WDR55	CSTF1	-1.07127	-1.09128	same	mmusculus	DIV10DIV3
IK	CSTF1	-1.24139	-1.09128	same	mmusculus	DIV10DIV3
PAFAH1B3	ICE1	-0.729695	-0.77751	same	mmusculus	DIV10DIV3
SCAMP1	SCAMP5	0.679014	1.42734	same	mmusculus	DIV10DIV3
MYO16	MYH14	0.999576	2.0006	same	mmusculus	DIV10DIV3
MYO5A	MYH14	0.666763	2.0006	same	mmusculus	DIV10DIV3
STAM	TOM1	0.771913	1.56892	same	mmusculus	DIV10DIV3
TOM1L2	TOM1	0.678344	1.56892	same	mmusculus	DIV10DIV3
GGA2	TOM1	0.787707	1.56892	same	mmusculus	DIV10DIV3
PLPP3	PLPPR4	1.25138	1.49104	same	mmusculus	DIV10DIV3
GM10282	HMGN2	-2.90983	-2.90983	same	mmusculus	DIV10DIV3
HMGN1	HMGN2	-2.78414	-2.90983	same	mmusculus	DIV10DIV3
SH3RF3	SH3GL2	0.700037	1.52711	same	mmusculus	DIV10DIV3
SH3GLB1	SH3GL2	1.37847	1.52711	same	mmusculus	DIV10DIV3
SH3GLB2	SH3GL2	1.07198	1.52711	same	mmusculus	DIV10DIV3
RAB40C	RAB3C	-1.24165	0.888138	opposite	mmusculus	DIV10DIV3
RAB3D	RAB3C	0.648294	0.888138	same	mmusculus	DIV10DIV3
RAB3B	RAB3C	1.08809	0.888138	same	mmusculus	DIV10DIV3
RAB4B	RAB3C	0.930811	0.888138	same	mmusculus	DIV10DIV3
RAB6B	RAB3C	0.944791	0.888138	same	mmusculus	DIV10DIV3
RAB33A	RAB3C	0.77652	0.888138	same	mmusculus	DIV10DIV3
RAB9	RAB3C	1.03935	0.888138	same	mmusculus	DIV10DIV3
RAB4A	RAB3C	1.05334	0.888138	same	mmusculus	DIV10DIV3
RAB36	RAB3C	1.16447	0.888138	same	mmusculus	DIV10DIV3
RAB3A	RAB3C	1.3075	0.888138	same	mmusculus	DIV10DIV3
RAB8B	RAB3C	-0.613733	0.888138	opposite	mmusculus	DIV10DIV3
RAB33B	RAB3C	0.752241	0.888138	same	mmusculus	DIV10DIV3
RAB9B	RAB3C	1.40212	0.888138	same	mmusculus	DIV10DIV3
CBLN4	CBLN1	1.57423	1.114	same	mmusculus	DIV10DIV3
ATG7	UBA5	0.586777	0.594739	same	mmusculus	DIV10DIV3
SAE1	UBA5	-1.04392	0.594739	opposite	mmusculus	DIV10DIV3
UBA2	UBA5	-1.30616	0.594739	opposite	mmusculus	DIV10DIV3
RHOF	CDC42	1.17499	0.840247	same	mmusculus	DIV10DIV3
RAC1	CDC42	0.647183	0.840247	same	mmusculus	DIV10DIV3
RAC3	CDC42	1.53222	0.840247	same	mmusculus	DIV10DIV3
HDGF	HDGFL2	-1.04124	-1.34737	same	mmusculus	DIV10DIV3
PSIP1	HDGFL2	-1.24575	-1.34737	same	mmusculus	DIV10DIV3
EIF3J1	EIF3J2	1.03183	0.820483	same	mmusculus	DIV10DIV3
PKIG	PKIA	0.689528	1.15624	same	mmusculus	DIV10DIV3
HMGA1B	HMGA1	-1.18261	-1.18261	same	mmusculus	DIV10DIV3
LGI1	LRIG1	2.26043	0.814767	same	mmusculus	DIV10DIV3
ELFN1	LRIG1	1.28227	0.814767	same	mmusculus	DIV10DIV3
ELFN2	LRIG1	1.47899	0.814767	same	mmusculus	DIV10DIV3
PHACTR1	PHACTR4	1.01803	-1.22494	opposite	mmusculus	DIV10DIV3
PRKCE	PRKCB	1.02585	1.8315	same	mmusculus	DIV10DIV3
PRKCG	PRKCB	1.39092	1.8315	same	mmusculus	DIV10DIV3
PRKCZ	PRKCB	0.942601	1.8315	same	mmusculus	DIV10DIV3
DPYSL2	DPYSL3	0.93236	0.855641	same	mmusculus	DIV10DIV3
CRMP1	DPYSL3	0.772554	0.855641	same	mmusculus	DIV10DIV3
DPYSL5	DPYSL3	0.871038	0.855641	same	mmusculus	DIV10DIV3
TUBB4A	TUBB6	1.63932	1.39808	same	mmusculus	DIV10DIV3
TUBAL3	TUBB6	0.705546	1.39808	same	mmusculus	DIV10DIV3
TUBA4A	TUBB6	2.42748	1.39808	same	mmusculus	DIV10DIV3
TUBB3	TUBB6	1.0142	1.39808	same	mmusculus	DIV10DIV3
TUBB5	TUBB6	0.80471	1.39808	same	mmusculus	DIV10DIV3
TUBB2B	TUBB6	0.906607	1.39808	same	mmusculus	DIV10DIV3
TUBB2A	TUBB6	1.85831	1.39808	same	mmusculus	DIV10DIV3
TTC9C	FKBP3	-0.666589	0.672023	opposite	mmusculus	DIV10DIV3
FKBP1B	FKBP3	1.80514	0.672023	same	mmusculus	DIV10DIV3
FKBP1A	FKBP3	1.03023	0.672023	same	mmusculus	DIV10DIV3
TTC9B	FKBP3	0.721639	0.672023	same	mmusculus	DIV10DIV3
FABP3	CRABP2	1.90707	-1.10761	opposite	mmusculus	DIV10DIV3
RBP1	CRABP2	-1.58087	-1.10761	same	mmusculus	DIV10DIV3
FABP7	CRABP2	0.973274	-1.10761	opposite	mmusculus	DIV10DIV3
CRABP1	CRABP2	-0.873501	-1.10761	same	mmusculus	DIV10DIV3
FAM171A2	FAM171B	0.751248	1.1195	same	mmusculus	DIV10DIV3
CRABP2	FABP7	-1.10761	0.973274	opposite	mmusculus	DIV10DIV3
FABP3	FABP7	1.90707	0.973274	same	mmusculus	DIV10DIV3
RBP1	FABP7	-1.58087	0.973274	opposite	mmusculus	DIV10DIV3
CRABP1	FABP7	-0.873501	0.973274	opposite	mmusculus	DIV10DIV3
SVIL	GSN	0.713552	0.66097	same	mmusculus	DIV10DIV3
RANBP1	RANBP2	1.03069	-0.932569	opposite	mmusculus	DIV10DIV3
RANBP3	RANBP2	-0.632071	-0.932569	same	mmusculus	DIV10DIV3
CBS	SRR	1.42704	1.95763	same	mmusculus	DIV10DIV3
PHYHIPL	PHYHIP	1.15347	2.15917	same	mmusculus	DIV10DIV3
LENG8	MCM3AP	-1.07426	-0.806898	same	mmusculus	DIV10DIV3
NFIB	NFIA	-2.09771	-2.14429	same	mmusculus	DIV10DIV3
NFIX	NFIA	-1.52474	-2.14429	same	mmusculus	DIV10DIV3
AP3B2	AP2B1	0.832062	0.602408	same	mmusculus	DIV10DIV3
WDR7	SNRNP40	1.17288	-1.0941	opposite	mmusculus	DIV10DIV3
PAFAH1B1	SNRNP40	0.803596	-1.0941	opposite	mmusculus	DIV10DIV3
WDR43	SNRNP40	-1.09518	-1.0941	same	mmusculus	DIV10DIV3
COP1	SNRNP40	-1.09556	-1.0941	same	mmusculus	DIV10DIV3
TBL2	SNRNP40	-0.688061	-1.0941	same	mmusculus	DIV10DIV3
PCBP1	IGF2BP3	-0.7054	-1.16162	same	mmusculus	DIV10DIV3
FUBP1	IGF2BP3	-1.02671	-1.16162	same	mmusculus	DIV10DIV3
KHSRP	IGF2BP3	-0.63237	-1.16162	same	mmusculus	DIV10DIV3
IGF2BP2	IGF2BP3	-0.888217	-1.16162	same	mmusculus	DIV10DIV3
HNRNPK	IGF2BP3	-0.620245	-1.16162	same	mmusculus	DIV10DIV3
PCBP3	IGF2BP3	0.987192	-1.16162	opposite	mmusculus	DIV10DIV3
IGF2BP1	IGF2BP3	-1.71191	-1.16162	same	mmusculus	DIV10DIV3
MAGI3	MAGI1	0.612403	0.912366	same	mmusculus	DIV10DIV3
PPWD1	CWC27	-1.08372	-0.942093	same	mmusculus	DIV10DIV3
PPIF	CWC27	-0.750633	-0.942093	same	mmusculus	DIV10DIV3
PPIL2	CWC27	-1.52913	-0.942093	same	mmusculus	DIV10DIV3
PPIL3	CWC27	-0.612669	-0.942093	same	mmusculus	DIV10DIV3
PPIA	CWC27	0.628919	-0.942093	opposite	mmusculus	DIV10DIV3
NKTR	CWC27	-0.988559	-0.942093	same	mmusculus	DIV10DIV3
PPIG	CWC27	-0.629086	-0.942093	same	mmusculus	DIV10DIV3
PPIL4	CWC27	-1.1597	-0.942093	same	mmusculus	DIV10DIV3
PPIE	CWC27	-1.76506	-0.942093	same	mmusculus	DIV10DIV3
PPIH	CWC27	-0.657139	-0.942093	same	mmusculus	DIV10DIV3
GM7879	CWC27	-0.657139	-0.942093	same	mmusculus	DIV10DIV3
PTGR1	SORD	-0.608935	0.715673	opposite	mmusculus	DIV10DIV3
VAT1L	SORD	1.33788	0.715673	same	mmusculus	DIV10DIV3
MVK	GALK1	1.27089	-0.666655	opposite	mmusculus	DIV10DIV3
SMARCC1	SMARCC2	-1.27949	-1.13047	same	mmusculus	DIV10DIV3
MYSM1	SMARCC2	-0.651821	-1.13047	same	mmusculus	DIV10DIV3
UBE2K	UBE2N	0.675059	0.723056	same	mmusculus	DIV10DIV3
UBE2O	UBE2N	0.781317	0.723056	same	mmusculus	DIV10DIV3
UBE2I	UBE2N	-0.928619	0.723056	opposite	mmusculus	DIV10DIV3
UBE2V2	UBE2N	0.755314	0.723056	same	mmusculus	DIV10DIV3
NDRG4	NDRG2	2.20261	1.348	same	mmusculus	DIV10DIV3
NDRG3	NDRG2	1.32087	1.348	same	mmusculus	DIV10DIV3
NDRG1	NDRG2	1.28663	1.348	same	mmusculus	DIV10DIV3
PURB	PURG	0.935006	1.40577	same	mmusculus	DIV10DIV3
PURA	PURG	0.61019	1.40577	same	mmusculus	DIV10DIV3
GTPBP4	DRG2	-1.53137	0.712163	opposite	mmusculus	DIV10DIV3
SNRNP40	COP1	-1.0941	-1.09556	same	mmusculus	DIV10DIV3
WDR7	COP1	1.17288	-1.09556	opposite	mmusculus	DIV10DIV3
PAFAH1B1	COP1	0.803596	-1.09556	opposite	mmusculus	DIV10DIV3
WDR43	COP1	-1.09518	-1.09556	same	mmusculus	DIV10DIV3
TBL2	COP1	-0.688061	-1.09556	same	mmusculus	DIV10DIV3
GRM7	GRM2	1.53626	0.594996	same	mmusculus	DIV10DIV3
GRM1	GRM2	1.24038	0.594996	same	mmusculus	DIV10DIV3
GRM5	GRM2	0.971951	0.594996	same	mmusculus	DIV10DIV3
GRM3	GRM2	0.968409	0.594996	same	mmusculus	DIV10DIV3
ZFP652	ZFP513	-2.25885	-1.0899	same	mmusculus	DIV10DIV3
PBX1	MEIS2	-0.855378	-0.809509	same	mmusculus	DIV10DIV3
XPNPEP1	PEPD	1.13027	0.675164	same	mmusculus	DIV10DIV3
GNAO1	GNAL	1.04193	0.921179	same	mmusculus	DIV10DIV3
GNAI1	GNAL	0.773331	0.921179	same	mmusculus	DIV10DIV3
GNAZ	GNAL	0.978164	0.921179	same	mmusculus	DIV10DIV3
MAP2	MAPT	1.03033	1.16799	same	mmusculus	DIV10DIV3
PPP3CB	PPP3CC	1.1114	0.897289	same	mmusculus	DIV10DIV3
PPP5C	PPP3CC	0.596574	0.897289	same	mmusculus	DIV10DIV3
PPP4C	PPP3CC	-0.843923	0.897289	opposite	mmusculus	DIV10DIV3
PPP2CA	PPP3CC	-1.07675	0.897289	opposite	mmusculus	DIV10DIV3
PPP3CA	PPP3CC	1.03843	0.897289	same	mmusculus	DIV10DIV3
PTPRA	PTPRF	0.693595	0.959329	same	mmusculus	DIV10DIV3
PTPRZ1	PTPRF	0.715479	0.959329	same	mmusculus	DIV10DIV3
PTPN2	PTPRF	-0.855354	0.959329	opposite	mmusculus	DIV10DIV3
PTPRN2	PTPRF	1.40545	0.959329	same	mmusculus	DIV10DIV3
PTPRS	PTPRF	0.940397	0.959329	same	mmusculus	DIV10DIV3
PTPRD	PTPRF	1.0235	0.959329	same	mmusculus	DIV10DIV3
PTPRT	PTPRF	0.734897	0.959329	same	mmusculus	DIV10DIV3
PTPRE	PTPRF	1.67223	0.959329	same	mmusculus	DIV10DIV3
SLC2A1	SLC2A3	-0.61256	0.665169	opposite	mmusculus	DIV10DIV3
SLC2A13	SLC2A3	1.13812	0.665169	same	mmusculus	DIV10DIV3
ATP6V1G1	ATP6V1G2	0.592203	2.12357	same	mmusculus	DIV10DIV3
GFAP	LMNB1	2.01198	-1.46725	opposite	mmusculus	DIV10DIV3
LMNB2	LMNB1	-1.17318	-1.46725	same	mmusculus	DIV10DIV3
GRIN1	GRIK3	0.985931	0.583122	same	mmusculus	DIV10DIV3
GRID1	GRIK3	1.43148	0.583122	same	mmusculus	DIV10DIV3
GRIA1	GRIK3	1.17154	0.583122	same	mmusculus	DIV10DIV3
EP400	SMARCA1	-1.04471	-0.882996	same	mmusculus	DIV10DIV3
CHD8	SMARCA1	-1.21157	-0.882996	same	mmusculus	DIV10DIV3
CHD9	SMARCA1	-0.824631	-0.882996	same	mmusculus	DIV10DIV3
SMARCA5	SMARCA1	-1.55376	-0.882996	same	mmusculus	DIV10DIV3
ATRX	SMARCA1	-0.827577	-0.882996	same	mmusculus	DIV10DIV3
CHD1	SMARCA1	-1.06803	-0.882996	same	mmusculus	DIV10DIV3
INO80	SMARCA1	-1.10435	-0.882996	same	mmusculus	DIV10DIV3
SMARCA4	SMARCA1	-1.21147	-0.882996	same	mmusculus	DIV10DIV3
CHD4	SMARCA1	-1.21223	-0.882996	same	mmusculus	DIV10DIV3
CHD2	SMARCA1	-0.998261	-0.882996	same	mmusculus	DIV10DIV3
SLC2A13	SLC2A1	1.13812	-0.61256	opposite	mmusculus	DIV10DIV3
SLC2A3	SLC2A1	0.665169	-0.61256	opposite	mmusculus	DIV10DIV3
ING4	ING1	-1.36412	-1.70278	same	mmusculus	DIV10DIV3
ING3	ING1	-1.55989	-1.70278	same	mmusculus	DIV10DIV3
KAT7	DPF3	-0.815127	-0.73969	same	mmusculus	DIV10DIV3
KAT8	DPF3	-1.13648	-0.73969	same	mmusculus	DIV10DIV3
DPF1	DPF3	-1.48095	-0.73969	same	mmusculus	DIV10DIV3
KAT5	DPF3	-0.736782	-0.73969	same	mmusculus	DIV10DIV3
DPF2	DPF3	-0.787347	-0.73969	same	mmusculus	DIV10DIV3
RBBP7	RBBP4	-0.756247	-1.57021	same	mmusculus	DIV10DIV3
RAP1GAP	GARNL3	1.53504	1.70212	same	mmusculus	DIV10DIV3
RAP1GAP2	GARNL3	1.69977	1.70212	same	mmusculus	DIV10DIV3
RAVER1	RBM15B	-0.915186	-1.05034	same	mmusculus	DIV10DIV3
GM38431	RBM15B	-0.915186	-1.05034	same	mmusculus	DIV10DIV3
SFPQ	RBM15B	-1.10441	-1.05034	same	mmusculus	DIV10DIV3
NONO	RBM15B	-1.11955	-1.05034	same	mmusculus	DIV10DIV3
ATP6V1G2	ATP6V1G1	2.12357	0.592203	same	mmusculus	DIV10DIV3
CASP6	CASP7	-1.85004	0.673648	opposite	mmusculus	DIV10DIV3
SF1	QK	-0.713093	0.711182	opposite	mmusculus	DIV10DIV3
KHDRBS2	QK	-0.737098	0.711182	opposite	mmusculus	DIV10DIV3
KHDRBS1	QK	-1.72247	0.711182	opposite	mmusculus	DIV10DIV3
DDX51	DDX39B	-1.31954	-0.607294	same	mmusculus	DIV10DIV3
EIF4A3	DDX39B	-1.0349	-0.607294	same	mmusculus	DIV10DIV3
DDX59	DDX39B	-0.72112	-0.607294	same	mmusculus	DIV10DIV3
DDX42	DDX39B	-0.841147	-0.607294	same	mmusculus	DIV10DIV3
DDX41	DDX39B	-0.976506	-0.607294	same	mmusculus	DIV10DIV3
DDX18	DDX39B	-1.14439	-0.607294	same	mmusculus	DIV10DIV3
DDX21	DDX39B	-1.43888	-0.607294	same	mmusculus	DIV10DIV3
DDX56	DDX39B	-1.15707	-0.607294	same	mmusculus	DIV10DIV3
DDX47	DDX39B	-1.00049	-0.607294	same	mmusculus	DIV10DIV3
DDX49	DDX39B	-1.05203	-0.607294	same	mmusculus	DIV10DIV3
DDX10	DDX39B	-0.762917	-0.607294	same	mmusculus	DIV10DIV3
DDX31	DDX39B	-1.2847	-0.607294	same	mmusculus	DIV10DIV3
DDX54	DDX39B	-1.24347	-0.607294	same	mmusculus	DIV10DIV3
DDX17	DDX39B	-0.918006	-0.607294	same	mmusculus	DIV10DIV3
DDX55	DDX39B	-1.06263	-0.607294	same	mmusculus	DIV10DIV3
DDX52	DDX39B	-0.998226	-0.607294	same	mmusculus	DIV10DIV3
DDX50	DDX39B	-1.07968	-0.607294	same	mmusculus	DIV10DIV3
DDX39	DDX39B	-0.687202	-0.607294	same	mmusculus	DIV10DIV3
DDX27	DDX39B	-1.33668	-0.607294	same	mmusculus	DIV10DIV3
ABCB8	ABCB6	-0.683923	1.05525	opposite	mmusculus	DIV10DIV3
CNNM2	CNNM4	1.05187	1.01161	same	mmusculus	DIV10DIV3
CAMKV	CAMK2B	1.43622	1.62736	same	mmusculus	DIV10DIV3
PHKG2	CAMK2B	0.66199	1.62736	same	mmusculus	DIV10DIV3
CAMK1	CAMK2B	1.17746	1.62736	same	mmusculus	DIV10DIV3
DCLK1	CAMK2B	1.0405	1.62736	same	mmusculus	DIV10DIV3
CAMKK1	CAMK2B	0.79515	1.62736	same	mmusculus	DIV10DIV3
CAMK2A	CAMK2B	2.41172	1.62736	same	mmusculus	DIV10DIV3
CAMKK2	CAMK2B	1.34034	1.62736	same	mmusculus	DIV10DIV3
CAMK1D	CAMK2B	1.53194	1.62736	same	mmusculus	DIV10DIV3
CAMK2D	CAMK2B	1.99972	1.62736	same	mmusculus	DIV10DIV3
TPRN	PPP1R18	-0.796871	-0.971553	same	mmusculus	DIV10DIV3
TPM1	TPM3	1.03272	0.708862	same	mmusculus	DIV10DIV3
FN1	TNR	-1.9364	1.09438	opposite	mmusculus	DIV10DIV3
ACADM	ACADS	0.913415	-0.604634	opposite	mmusculus	DIV10DIV3
PHYHIP	PHYHIPL	2.15917	1.15347	same	mmusculus	DIV10DIV3
MTHFD2L	MTHFD2	-1.28671	-0.659565	same	mmusculus	DIV10DIV3
RANBP2	RANBP1	-0.932569	1.03069	opposite	mmusculus	DIV10DIV3
RANBP3	RANBP1	-0.632071	1.03069	opposite	mmusculus	DIV10DIV3
RCC2	RCC1	-1.6465	-0.886316	same	mmusculus	DIV10DIV3
RCBTB2	RCC1	-0.913244	-0.886316	same	mmusculus	DIV10DIV3
ALS2	RCC1	0.624845	-0.886316	opposite	mmusculus	DIV10DIV3
HDAC1	HDAC6	-1.70856	-0.720561	same	mmusculus	DIV10DIV3
HDAC11	HDAC6	0.936526	-0.720561	opposite	mmusculus	DIV10DIV3
SPTBN1	CLMN	1.58523	1.30785	same	mmusculus	DIV10DIV3
SYNE2	CLMN	-1.68097	1.30785	opposite	mmusculus	DIV10DIV3
FLNC	CLMN	-1.21964	1.30785	opposite	mmusculus	DIV10DIV3
FLNA	CLMN	-0.924301	1.30785	opposite	mmusculus	DIV10DIV3
SYNE1	CLMN	1.23709	1.30785	same	mmusculus	DIV10DIV3
PLEC	CLMN	0.895815	1.30785	same	mmusculus	DIV10DIV3
ACTN1	CLMN	0.663592	1.30785	same	mmusculus	DIV10DIV3
FLNB	CLMN	-1.05224	1.30785	opposite	mmusculus	DIV10DIV3
DSP	CLMN	-1.07846	1.30785	opposite	mmusculus	DIV10DIV3
DTNA	CLMN	0.818778	1.30785	same	mmusculus	DIV10DIV3
DMD	CLMN	0.662038	1.30785	same	mmusculus	DIV10DIV3
MICAL1	CLMN	-1.2204	1.30785	opposite	mmusculus	DIV10DIV3
SPTAN1	CLMN	1.20463	1.30785	same	mmusculus	DIV10DIV3
RCOR2	RCOR1	-1.26124	-0.809792	same	mmusculus	DIV10DIV3
CLIC1	GSTO1	-1.76551	1.1474	opposite	mmusculus	DIV10DIV3
PCBP1	IGF2BP2	-0.7054	-0.888217	same	mmusculus	DIV10DIV3
FUBP1	IGF2BP2	-1.02671	-0.888217	same	mmusculus	DIV10DIV3
KHSRP	IGF2BP2	-0.63237	-0.888217	same	mmusculus	DIV10DIV3
IGF2BP3	IGF2BP2	-1.16162	-0.888217	same	mmusculus	DIV10DIV3
HNRNPK	IGF2BP2	-0.620245	-0.888217	same	mmusculus	DIV10DIV3
PCBP3	IGF2BP2	0.987192	-0.888217	opposite	mmusculus	DIV10DIV3
IGF2BP1	IGF2BP2	-1.71191	-0.888217	same	mmusculus	DIV10DIV3
GFOD2	GFOD1	0.644273	1.21371	same	mmusculus	DIV10DIV3
CLASRP	SFSWAP	-0.92256	-1.23329	same	mmusculus	DIV10DIV3
PPP5C	PPP2CA	0.596574	-1.07675	opposite	mmusculus	DIV10DIV3
PPP4C	PPP2CA	-0.843923	-1.07675	same	mmusculus	DIV10DIV3
PPP3CC	PPP2CA	0.897289	-1.07675	opposite	mmusculus	DIV10DIV3
PPP3CB	PPP2CA	1.1114	-1.07675	opposite	mmusculus	DIV10DIV3
PPP3CA	PPP2CA	1.03843	-1.07675	opposite	mmusculus	DIV10DIV3
ACTL6A	ACTR10	-0.824601	0.68807	opposite	mmusculus	DIV10DIV3
ACTR3B	ACTR10	2.49338	0.68807	same	mmusculus	DIV10DIV3
ACTR1B	ACTR10	1.29431	0.68807	same	mmusculus	DIV10DIV3
ACTC1	ACTR10	0.647627	0.68807	same	mmusculus	DIV10DIV3
ACTR8	ACTR10	-0.826908	0.68807	opposite	mmusculus	DIV10DIV3
BRMS1L	SUDS3	-1.13196	-0.797052	same	mmusculus	DIV10DIV3
ABLIM1	ABLIM3	1.19205	0.683251	same	mmusculus	DIV10DIV3
DMTN	ABLIM3	1.98716	0.683251	same	mmusculus	DIV10DIV3
ABLIM2	ABLIM3	1.72534	0.683251	same	mmusculus	DIV10DIV3
DHRS7	DHRS4	0.615021	-1.87136	opposite	mmusculus	DIV10DIV3
HMGB1	HMGB2	-0.987511	-0.999251	same	mmusculus	DIV10DIV3
HMG20B	HMGB2	-0.942249	-0.999251	same	mmusculus	DIV10DIV3
TOX	HMGB2	-1.92757	-0.999251	same	mmusculus	DIV10DIV3
HMG20A	HMGB2	-1.5209	-0.999251	same	mmusculus	DIV10DIV3
SMARCE1	HMGB2	-1.30519	-0.999251	same	mmusculus	DIV10DIV3
TOX4	HMGB2	-1.75404	-0.999251	same	mmusculus	DIV10DIV3
HMGB3	HMGB2	-0.698132	-0.999251	same	mmusculus	DIV10DIV3
FAM76B	FAM76A	-2.43064	-1.18662	same	mmusculus	DIV10DIV3
ABCA1	ABCA3	0.790906	0.797418	same	mmusculus	DIV10DIV3
ACOT7	ACOT11	1.41242	1.66023	same	mmusculus	DIV10DIV3
PRPF6	CRNKL1	-1.22995	-1.51135	same	mmusculus	DIV10DIV3
XAB2	CRNKL1	-1.07781	-1.51135	same	mmusculus	DIV10DIV3
QK	KHDRBS2	0.711182	-0.737098	opposite	mmusculus	DIV10DIV3
SF1	KHDRBS2	-0.713093	-0.737098	same	mmusculus	DIV10DIV3
KHDRBS1	KHDRBS2	-1.72247	-0.737098	same	mmusculus	DIV10DIV3
SGSM1	SGSM2	1.62544	0.713002	same	mmusculus	DIV10DIV3
TBC1D9	SGSM2	0.929098	0.713002	same	mmusculus	DIV10DIV3
CACHD1	CACNA2D2	-0.582068	1.17676	opposite	mmusculus	DIV10DIV3
CACNA2D1	CACNA2D2	0.915402	1.17676	same	mmusculus	DIV10DIV3
RBMS2	SF3B4	-1.32225	-1.13479	same	mmusculus	DIV10DIV3
RBM14	SF3B4	-1.22746	-1.13479	same	mmusculus	DIV10DIV3
ELAVL1	SF3B4	-0.77794	-1.13479	same	mmusculus	DIV10DIV3
PUF60	SF3B4	-0.59662	-1.13479	same	mmusculus	DIV10DIV3
TARDBP	SF3B4	-1.57171	-1.13479	same	mmusculus	DIV10DIV3
ELAVL2	SF3B4	-0.808738	-1.13479	same	mmusculus	DIV10DIV3
RBM45	SF3B4	-0.841617	-1.13479	same	mmusculus	DIV10DIV3
CADM1	CADM3	1.70519	1.02081	same	mmusculus	DIV10DIV3
NECTIN1	CADM3	1.34446	1.02081	same	mmusculus	DIV10DIV3
HECW2	TRIP12	1.54808	-0.984819	opposite	mmusculus	DIV10DIV3
WWP1	TRIP12	0.881067	-0.984819	opposite	mmusculus	DIV10DIV3
UBE3B	TRIP12	0.655325	-0.984819	opposite	mmusculus	DIV10DIV3
SIRT7	SIRT5	-1.31293	-1.27253	same	mmusculus	DIV10DIV3
SIRT3	SIRT5	0.685015	-1.27253	opposite	mmusculus	DIV10DIV3
SIRT1	SIRT5	-0.90576	-1.27253	same	mmusculus	DIV10DIV3
PLXNC1	PLXND1	1.34149	1.34754	same	mmusculus	DIV10DIV3
PLXNA1	PLXND1	1.1758	1.34754	same	mmusculus	DIV10DIV3
PLXNB1	PLXND1	0.614657	1.34754	same	mmusculus	DIV10DIV3
PLXNA4	PLXND1	0.694769	1.34754	same	mmusculus	DIV10DIV3
RBFOX3	RBFOX2	0.950081	-0.828163	opposite	mmusculus	DIV10DIV3
EP400	CHD4	-1.04471	-1.21223	same	mmusculus	DIV10DIV3
CHD8	CHD4	-1.21157	-1.21223	same	mmusculus	DIV10DIV3
CHD9	CHD4	-0.824631	-1.21223	same	mmusculus	DIV10DIV3
SMARCA5	CHD4	-1.55376	-1.21223	same	mmusculus	DIV10DIV3
ATRX	CHD4	-0.827577	-1.21223	same	mmusculus	DIV10DIV3
SMARCA1	CHD4	-0.882996	-1.21223	same	mmusculus	DIV10DIV3
CHD1	CHD4	-1.06803	-1.21223	same	mmusculus	DIV10DIV3
INO80	CHD4	-1.10435	-1.21223	same	mmusculus	DIV10DIV3
SMARCA4	CHD4	-1.21147	-1.21223	same	mmusculus	DIV10DIV3
CHD2	CHD4	-0.998261	-1.21223	same	mmusculus	DIV10DIV3
SYN1	SYN3	1.56359	1.17546	same	mmusculus	DIV10DIV3
SYN2	SYN3	2.22413	1.17546	same	mmusculus	DIV10DIV3
LRFN1	SLIT3	0.848951	0.66967	same	mmusculus	DIV10DIV3
SLITRK5	SLIT3	0.587958	0.66967	same	mmusculus	DIV10DIV3
LINGO1	SLIT3	1.22383	0.66967	same	mmusculus	DIV10DIV3
LRFN2	SLIT3	1.15804	0.66967	same	mmusculus	DIV10DIV3
LRFN4	SLIT3	0.978451	0.66967	same	mmusculus	DIV10DIV3
LINGO2	SLIT3	1.37234	0.66967	same	mmusculus	DIV10DIV3
SLIT1	SLIT3	0.799167	0.66967	same	mmusculus	DIV10DIV3
RAB40C	RAB3A	-1.24165	1.3075	opposite	mmusculus	DIV10DIV3
RAB3D	RAB3A	0.648294	1.3075	same	mmusculus	DIV10DIV3
RAB3B	RAB3A	1.08809	1.3075	same	mmusculus	DIV10DIV3
RAB4B	RAB3A	0.930811	1.3075	same	mmusculus	DIV10DIV3
RAB6B	RAB3A	0.944791	1.3075	same	mmusculus	DIV10DIV3
RAB33A	RAB3A	0.77652	1.3075	same	mmusculus	DIV10DIV3
RAB9	RAB3A	1.03935	1.3075	same	mmusculus	DIV10DIV3
RAB3C	RAB3A	0.888138	1.3075	same	mmusculus	DIV10DIV3
RAB4A	RAB3A	1.05334	1.3075	same	mmusculus	DIV10DIV3
RAB36	RAB3A	1.16447	1.3075	same	mmusculus	DIV10DIV3
RAB8B	RAB3A	-0.613733	1.3075	opposite	mmusculus	DIV10DIV3
RAB33B	RAB3A	0.752241	1.3075	same	mmusculus	DIV10DIV3
RAB9B	RAB3A	1.40212	1.3075	same	mmusculus	DIV10DIV3
TAF9	TAF9B	-1.55742	0.631647	opposite	mmusculus	DIV10DIV3
AK6	TAF9B	-1.55742	0.631647	opposite	mmusculus	DIV10DIV3
SNX16	PXK	1.05172	-0.808803	opposite	mmusculus	DIV10DIV3
WIZ	ZFP57	-1.61871	-1.71703	same	mmusculus	DIV10DIV3
ZFP768	ZFP57	-1.36873	-1.71703	same	mmusculus	DIV10DIV3
ZFP592	ZFP57	-1.10703	-1.71703	same	mmusculus	DIV10DIV3
ZFP687	ZFP57	-1.6848	-1.71703	same	mmusculus	DIV10DIV3
SGSM2	SGSM1	0.713002	1.62544	same	mmusculus	DIV10DIV3
TBC1D9	SGSM1	0.929098	1.62544	same	mmusculus	DIV10DIV3
BRINP2	BRINP1	1.57489	0.677024	same	mmusculus	DIV10DIV3
ANP32A	ANP32B	-0.949402	-1.01813	same	mmusculus	DIV10DIV3
RAB40C	RAB6B	-1.24165	0.944791	opposite	mmusculus	DIV10DIV3
RAB3D	RAB6B	0.648294	0.944791	same	mmusculus	DIV10DIV3
RAB3B	RAB6B	1.08809	0.944791	same	mmusculus	DIV10DIV3
RAB4B	RAB6B	0.930811	0.944791	same	mmusculus	DIV10DIV3
RAB33A	RAB6B	0.77652	0.944791	same	mmusculus	DIV10DIV3
RAB9	RAB6B	1.03935	0.944791	same	mmusculus	DIV10DIV3
RAB3C	RAB6B	0.888138	0.944791	same	mmusculus	DIV10DIV3
RAB4A	RAB6B	1.05334	0.944791	same	mmusculus	DIV10DIV3
RAB36	RAB6B	1.16447	0.944791	same	mmusculus	DIV10DIV3
RAB3A	RAB6B	1.3075	0.944791	same	mmusculus	DIV10DIV3
RAB8B	RAB6B	-0.613733	0.944791	opposite	mmusculus	DIV10DIV3
RAB33B	RAB6B	0.752241	0.944791	same	mmusculus	DIV10DIV3
RAB9B	RAB6B	1.40212	0.944791	same	mmusculus	DIV10DIV3
SYN1	SYN2	1.56359	2.22413	same	mmusculus	DIV10DIV3
SYN3	SYN2	1.17546	2.22413	same	mmusculus	DIV10DIV3
ITGA6	ITGAV	0.581228	0.832522	same	mmusculus	DIV10DIV3
ITGA3	ITGAV	0.72208	0.832522	same	mmusculus	DIV10DIV3
DPYSL2	CRMP1	0.93236	0.772554	same	mmusculus	DIV10DIV3
DPYSL3	CRMP1	0.855641	0.772554	same	mmusculus	DIV10DIV3
DPYSL5	CRMP1	0.871038	0.772554	same	mmusculus	DIV10DIV3
TRF	SRPRB	-0.700802	-0.911961	same	mmusculus	DIV10DIV3
SUN2	SUN1	-1.22363	-0.607149	same	mmusculus	DIV10DIV3
DGKG	DGKB	0.683265	1.23779	same	mmusculus	DIV10DIV3
EXOSC7	EXOSC9	-0.967288	-0.694872	same	mmusculus	DIV10DIV3
EXOSC8	EXOSC9	-0.774532	-0.694872	same	mmusculus	DIV10DIV3
SRPRB	TRF	-0.911961	-0.700802	same	mmusculus	DIV10DIV3
CRABP2	FABP3	-1.10761	1.90707	opposite	mmusculus	DIV10DIV3
RBP1	FABP3	-1.58087	1.90707	opposite	mmusculus	DIV10DIV3
FABP7	FABP3	0.973274	1.90707	same	mmusculus	DIV10DIV3
CRABP1	FABP3	-0.873501	1.90707	opposite	mmusculus	DIV10DIV3
GID8	RANBP9	0.74507	0.898969	same	mmusculus	DIV10DIV3
RCN1	RCN3	0.675915	-1.84665	opposite	mmusculus	DIV10DIV3
MFGE8	NRXN1	1.97644	1.15001	same	mmusculus	DIV10DIV3
NRXN3	NRXN1	1.25745	1.15001	same	mmusculus	DIV10DIV3
CNTNAP2	NRXN1	1.0284	1.15001	same	mmusculus	DIV10DIV3
EDIL3	NRXN1	0.71376	1.15001	same	mmusculus	DIV10DIV3
NRP1	NRXN1	-0.590275	1.15001	opposite	mmusculus	DIV10DIV3
NRXN3	MFGE8	1.25745	1.97644	same	mmusculus	DIV10DIV3
CNTNAP2	MFGE8	1.0284	1.97644	same	mmusculus	DIV10DIV3
NRXN1	MFGE8	1.15001	1.97644	same	mmusculus	DIV10DIV3
EDIL3	MFGE8	0.71376	1.97644	same	mmusculus	DIV10DIV3
NRP1	MFGE8	-0.590275	1.97644	opposite	mmusculus	DIV10DIV3
RPH3A	SYT1	1.80671	1.57407	same	mmusculus	DIV10DIV3
SYT7	SYT1	1.49364	1.57407	same	mmusculus	DIV10DIV3
SYT11	SYT1	1.23914	1.57407	same	mmusculus	DIV10DIV3
SYT5	SYT1	0.59381	1.57407	same	mmusculus	DIV10DIV3
UHRF1	UHRF2	-0.999681	-2.2736	same	mmusculus	DIV10DIV3
MTHFD2	MTHFD2L	-0.659565	-1.28671	same	mmusculus	DIV10DIV3
PRKCE	PRKCZ	1.02585	0.942601	same	mmusculus	DIV10DIV3
PRKCG	PRKCZ	1.39092	0.942601	same	mmusculus	DIV10DIV3
PRKCB	PRKCZ	1.8315	0.942601	same	mmusculus	DIV10DIV3
DDX51	DDX21	-1.31954	-1.43888	same	mmusculus	DIV10DIV3
EIF4A3	DDX21	-1.0349	-1.43888	same	mmusculus	DIV10DIV3
DDX59	DDX21	-0.72112	-1.43888	same	mmusculus	DIV10DIV3
DDX42	DDX21	-0.841147	-1.43888	same	mmusculus	DIV10DIV3
DDX41	DDX21	-0.976506	-1.43888	same	mmusculus	DIV10DIV3
DDX18	DDX21	-1.14439	-1.43888	same	mmusculus	DIV10DIV3
DDX56	DDX21	-1.15707	-1.43888	same	mmusculus	DIV10DIV3
DDX47	DDX21	-1.00049	-1.43888	same	mmusculus	DIV10DIV3
DDX49	DDX21	-1.05203	-1.43888	same	mmusculus	DIV10DIV3
DDX10	DDX21	-0.762917	-1.43888	same	mmusculus	DIV10DIV3
DDX31	DDX21	-1.2847	-1.43888	same	mmusculus	DIV10DIV3
DDX54	DDX21	-1.24347	-1.43888	same	mmusculus	DIV10DIV3
DDX17	DDX21	-0.918006	-1.43888	same	mmusculus	DIV10DIV3
DDX55	DDX21	-1.06263	-1.43888	same	mmusculus	DIV10DIV3
DDX52	DDX21	-0.998226	-1.43888	same	mmusculus	DIV10DIV3
DDX50	DDX21	-1.07968	-1.43888	same	mmusculus	DIV10DIV3
DDX39B	DDX21	-0.607294	-1.43888	same	mmusculus	DIV10DIV3
DDX39	DDX21	-0.687202	-1.43888	same	mmusculus	DIV10DIV3
DDX27	DDX21	-1.33668	-1.43888	same	mmusculus	DIV10DIV3
EXT1	EXT2	-0.591143	-0.624958	same	mmusculus	DIV10DIV3
ADCY9	ADCY1	0.792302	1.58061	same	mmusculus	DIV10DIV3
GUCY1A1	ADCY1	1.18296	1.58061	same	mmusculus	DIV10DIV3
ADCY8	ADCY1	1.45674	1.58061	same	mmusculus	DIV10DIV3
ADCY3	ADCY1	0.974118	1.58061	same	mmusculus	DIV10DIV3
ADCY5	ADCY1	1.01768	1.58061	same	mmusculus	DIV10DIV3
GUCY1B1	ADCY1	1.51379	1.58061	same	mmusculus	DIV10DIV3
SLITRK5	LRFN1	0.587958	0.848951	same	mmusculus	DIV10DIV3
SLIT3	LRFN1	0.66967	0.848951	same	mmusculus	DIV10DIV3
LINGO1	LRFN1	1.22383	0.848951	same	mmusculus	DIV10DIV3
LRFN2	LRFN1	1.15804	0.848951	same	mmusculus	DIV10DIV3
LRFN4	LRFN1	0.978451	0.848951	same	mmusculus	DIV10DIV3
LINGO2	LRFN1	1.37234	0.848951	same	mmusculus	DIV10DIV3
SLIT1	LRFN1	0.799167	0.848951	same	mmusculus	DIV10DIV3
HSPA1B	HSPH1	1.38999	0.904637	same	mmusculus	DIV10DIV3
HSPA2	HSPH1	1.89575	0.904637	same	mmusculus	DIV10DIV3
HSPA4L	HSPH1	0.91565	0.904637	same	mmusculus	DIV10DIV3
LRFN1	SLIT1	0.848951	0.799167	same	mmusculus	DIV10DIV3
SLITRK5	SLIT1	0.587958	0.799167	same	mmusculus	DIV10DIV3
SLIT3	SLIT1	0.66967	0.799167	same	mmusculus	DIV10DIV3
LINGO1	SLIT1	1.22383	0.799167	same	mmusculus	DIV10DIV3
LRFN2	SLIT1	1.15804	0.799167	same	mmusculus	DIV10DIV3
LRFN4	SLIT1	0.978451	0.799167	same	mmusculus	DIV10DIV3
LINGO2	SLIT1	1.37234	0.799167	same	mmusculus	DIV10DIV3
HNRNPAB	HNRNPA2B1	-1.53657	-0.931961	same	mmusculus	DIV10DIV3
RBM4B	HNRNPA2B1	-2.25259	-0.931961	same	mmusculus	DIV10DIV3
HNRNPD	HNRNPA2B1	-0.656835	-0.931961	same	mmusculus	DIV10DIV3
DAZAP1	HNRNPA2B1	-1.35649	-0.931961	same	mmusculus	DIV10DIV3
MSI1	HNRNPA2B1	-0.901776	-0.931961	same	mmusculus	DIV10DIV3
HNRNPA3	HNRNPA2B1	-0.681519	-0.931961	same	mmusculus	DIV10DIV3
HNRNPA1	HNRNPA2B1	-1.06854	-0.931961	same	mmusculus	DIV10DIV3
HNRNPA0	HNRNPA2B1	-2.56571	-0.931961	same	mmusculus	DIV10DIV3
TIA1	HNRNPA2B1	-1.29589	-0.931961	same	mmusculus	DIV10DIV3
RBM39	HNRNPA2B1	-0.769526	-0.931961	same	mmusculus	DIV10DIV3
RBMX	HNRNPA2B1	-1.76124	-0.931961	same	mmusculus	DIV10DIV3
RBMXL1	HNRNPA2B1	-1.26163	-0.931961	same	mmusculus	DIV10DIV3
CIRBP	HNRNPA2B1	-1.16632	-0.931961	same	mmusculus	DIV10DIV3
CARMIL3	RNH1	0.609587	-0.673836	opposite	mmusculus	DIV10DIV3
CARMIL1	RNH1	0.883375	-0.673836	opposite	mmusculus	DIV10DIV3
AP3S2	AP2S1	0.674341	1.14144	same	mmusculus	DIV10DIV3
AP3S1	AP2S1	0.637086	1.14144	same	mmusculus	DIV10DIV3
AP1S1	AP2S1	0.621615	1.14144	same	mmusculus	DIV10DIV3
EP400	SMARCA5	-1.04471	-1.55376	same	mmusculus	DIV10DIV3
CHD8	SMARCA5	-1.21157	-1.55376	same	mmusculus	DIV10DIV3
CHD9	SMARCA5	-0.824631	-1.55376	same	mmusculus	DIV10DIV3
ATRX	SMARCA5	-0.827577	-1.55376	same	mmusculus	DIV10DIV3
SMARCA1	SMARCA5	-0.882996	-1.55376	same	mmusculus	DIV10DIV3
CHD1	SMARCA5	-1.06803	-1.55376	same	mmusculus	DIV10DIV3
INO80	SMARCA5	-1.10435	-1.55376	same	mmusculus	DIV10DIV3
SMARCA4	SMARCA5	-1.21147	-1.55376	same	mmusculus	DIV10DIV3
CHD4	SMARCA5	-1.21223	-1.55376	same	mmusculus	DIV10DIV3
CHD2	SMARCA5	-0.998261	-1.55376	same	mmusculus	DIV10DIV3
TTF1	CDC5L	-0.612667	-0.917586	same	mmusculus	DIV10DIV3
SLC25A14	SLC25A51	-0.8502	-0.616439	same	mmusculus	DIV10DIV3
SLC25A13	SLC25A51	-1.15742	-0.616439	same	mmusculus	DIV10DIV3
SLC25A12	SLC25A51	0.993716	-0.616439	opposite	mmusculus	DIV10DIV3
SLC25A18	SLC25A51	1.44432	-0.616439	opposite	mmusculus	DIV10DIV3
SLC25A22	SLC25A51	1.10089	-0.616439	opposite	mmusculus	DIV10DIV3
SLC25A24	SLC25A51	-1.88679	-0.616439	same	mmusculus	DIV10DIV3
CDKN2AIPNL	CDKN2AIP	-1.09407	-2.02445	same	mmusculus	DIV10DIV3
NKRF	CDKN2AIP	-1.25307	-2.02445	same	mmusculus	DIV10DIV3
SYBU	SNPH	-0.99103	0.83101	opposite	mmusculus	DIV10DIV3
OXR1	NCOA7	0.671666	0.595375	same	mmusculus	DIV10DIV3
SPTBN1	FLNB	1.58523	-1.05224	opposite	mmusculus	DIV10DIV3
SYNE2	FLNB	-1.68097	-1.05224	same	mmusculus	DIV10DIV3
FLNC	FLNB	-1.21964	-1.05224	same	mmusculus	DIV10DIV3
FLNA	FLNB	-0.924301	-1.05224	same	mmusculus	DIV10DIV3
SYNE1	FLNB	1.23709	-1.05224	opposite	mmusculus	DIV10DIV3
PLEC	FLNB	0.895815	-1.05224	opposite	mmusculus	DIV10DIV3
ACTN1	FLNB	0.663592	-1.05224	opposite	mmusculus	DIV10DIV3
DSP	FLNB	-1.07846	-1.05224	same	mmusculus	DIV10DIV3
CLMN	FLNB	1.30785	-1.05224	opposite	mmusculus	DIV10DIV3
DTNA	FLNB	0.818778	-1.05224	opposite	mmusculus	DIV10DIV3
DMD	FLNB	0.662038	-1.05224	opposite	mmusculus	DIV10DIV3
MICAL1	FLNB	-1.2204	-1.05224	same	mmusculus	DIV10DIV3
SPTAN1	FLNB	1.20463	-1.05224	opposite	mmusculus	DIV10DIV3
NECAB1	NECAB2	2.69906	1.57385	same	mmusculus	DIV10DIV3
ATP2B4	ATP1A1	2.49408	0.773993	same	mmusculus	DIV10DIV3
ATP2B1	ATP1A1	1.2105	0.773993	same	mmusculus	DIV10DIV3
ATP2B2	ATP1A1	1.17235	0.773993	same	mmusculus	DIV10DIV3
ATP1A3	ATP1A1	1.32171	0.773993	same	mmusculus	DIV10DIV3
ATP1A2	ATP1A1	1.84301	0.773993	same	mmusculus	DIV10DIV3
UBE2K	UBE2O	0.675059	0.781317	same	mmusculus	DIV10DIV3
UBE2I	UBE2O	-0.928619	0.781317	opposite	mmusculus	DIV10DIV3
UBE2N	UBE2O	0.723056	0.781317	same	mmusculus	DIV10DIV3
UBE2V2	UBE2O	0.755314	0.781317	same	mmusculus	DIV10DIV3
LUC7L2	LUC7L3	-0.873584	-0.804005	same	mmusculus	DIV10DIV3
DDX51	DDX50	-1.31954	-1.07968	same	mmusculus	DIV10DIV3
EIF4A3	DDX50	-1.0349	-1.07968	same	mmusculus	DIV10DIV3
DDX59	DDX50	-0.72112	-1.07968	same	mmusculus	DIV10DIV3
DDX42	DDX50	-0.841147	-1.07968	same	mmusculus	DIV10DIV3
DDX41	DDX50	-0.976506	-1.07968	same	mmusculus	DIV10DIV3
DDX18	DDX50	-1.14439	-1.07968	same	mmusculus	DIV10DIV3
DDX21	DDX50	-1.43888	-1.07968	same	mmusculus	DIV10DIV3
DDX56	DDX50	-1.15707	-1.07968	same	mmusculus	DIV10DIV3
DDX47	DDX50	-1.00049	-1.07968	same	mmusculus	DIV10DIV3
DDX49	DDX50	-1.05203	-1.07968	same	mmusculus	DIV10DIV3
DDX10	DDX50	-0.762917	-1.07968	same	mmusculus	DIV10DIV3
DDX31	DDX50	-1.2847	-1.07968	same	mmusculus	DIV10DIV3
DDX54	DDX50	-1.24347	-1.07968	same	mmusculus	DIV10DIV3
DDX17	DDX50	-0.918006	-1.07968	same	mmusculus	DIV10DIV3
DDX55	DDX50	-1.06263	-1.07968	same	mmusculus	DIV10DIV3
DDX52	DDX50	-0.998226	-1.07968	same	mmusculus	DIV10DIV3
DDX39B	DDX50	-0.607294	-1.07968	same	mmusculus	DIV10DIV3
DDX39	DDX50	-0.687202	-1.07968	same	mmusculus	DIV10DIV3
DDX27	DDX50	-1.33668	-1.07968	same	mmusculus	DIV10DIV3
NPM3	NPM1	-1.48365	-0.78651	same	mmusculus	DIV10DIV3
CPSF2	CPSF3	-0.820768	-0.855579	same	mmusculus	DIV10DIV3
INTS11	CPSF3	-1.16297	-0.855579	same	mmusculus	DIV10DIV3
SYN2	SYN1	2.22413	1.56359	same	mmusculus	DIV10DIV3
SYN3	SYN1	1.17546	1.56359	same	mmusculus	DIV10DIV3
PPP3CC	PPP3CB	0.897289	1.1114	same	mmusculus	DIV10DIV3
PPP5C	PPP3CB	0.596574	1.1114	same	mmusculus	DIV10DIV3
PPP4C	PPP3CB	-0.843923	1.1114	opposite	mmusculus	DIV10DIV3
PPP2CA	PPP3CB	-1.07675	1.1114	opposite	mmusculus	DIV10DIV3
PPP3CA	PPP3CB	1.03843	1.1114	same	mmusculus	DIV10DIV3
TESK1	ARAF	-0.712897	0.951913	opposite	mmusculus	DIV10DIV3
CACNA2D2	CACHD1	1.17676	-0.582068	opposite	mmusculus	DIV10DIV3
CACNA2D1	CACHD1	0.915402	-0.582068	opposite	mmusculus	DIV10DIV3
DYNLT1F	DYNLT1C	1.12087	1.12087	same	mmusculus	DIV10DIV3
DYNLT1B	DYNLT1C	1.12087	1.12087	same	mmusculus	DIV10DIV3
DYNLT1A	DYNLT1C	1.12087	1.12087	same	mmusculus	DIV10DIV3
POU3F1	POU3F2	-1.47612	-1.79592	same	mmusculus	DIV10DIV3
POU3F3	POU3F2	-2.39679	-1.79592	same	mmusculus	DIV10DIV3
SPARC	SPARCL1	0.839676	1.50177	same	mmusculus	DIV10DIV3
GM9803	PAM16	-0.967879	-0.967879	same	mmusculus	DIV10DIV3
NCALD	HPCA	2.47416	2.51884	same	mmusculus	DIV10DIV3
VSNL1	HPCA	2.45794	2.51884	same	mmusculus	DIV10DIV3
HPCAL4	HPCA	1.39628	2.51884	same	mmusculus	DIV10DIV3
KCNIP4	HPCA	0.821977	2.51884	same	mmusculus	DIV10DIV3
HPCAL1	HPCA	1.61015	2.51884	same	mmusculus	DIV10DIV3
DYNLT1B	DYNLT1F	1.12087	1.12087	same	mmusculus	DIV10DIV3
DYNLT1A	DYNLT1F	1.12087	1.12087	same	mmusculus	DIV10DIV3
DYNLT1C	DYNLT1F	1.12087	1.12087	same	mmusculus	DIV10DIV3
FSD1	FSD1L	0.912065	0.896427	same	mmusculus	DIV10DIV3
RNF20	RNF40	-0.585404	-0.645071	same	mmusculus	DIV10DIV3
ZBTB18	ZFP91	-1.28393	-1.52186	same	mmusculus	DIV10DIV3
ZBTB20	ZFP91	-1.73663	-1.52186	same	mmusculus	DIV10DIV3
ZFP281	ZFP91	-0.798673	-1.52186	same	mmusculus	DIV10DIV3
ZFP148	ZFP91	-1.07595	-1.52186	same	mmusculus	DIV10DIV3
CSMD1	SEZ6L	0.695146	1.15091	same	mmusculus	DIV10DIV3
HMGB1	TOX4	-0.987511	-1.75404	same	mmusculus	DIV10DIV3
HMG20B	TOX4	-0.942249	-1.75404	same	mmusculus	DIV10DIV3
HMGB2	TOX4	-0.999251	-1.75404	same	mmusculus	DIV10DIV3
TOX	TOX4	-1.92757	-1.75404	same	mmusculus	DIV10DIV3
HMG20A	TOX4	-1.5209	-1.75404	same	mmusculus	DIV10DIV3
SMARCE1	TOX4	-1.30519	-1.75404	same	mmusculus	DIV10DIV3
HMGB3	TOX4	-0.698132	-1.75404	same	mmusculus	DIV10DIV3
ADCY9	ADCY3	0.792302	0.974118	same	mmusculus	DIV10DIV3
GUCY1A1	ADCY3	1.18296	0.974118	same	mmusculus	DIV10DIV3
ADCY1	ADCY3	1.58061	0.974118	same	mmusculus	DIV10DIV3
ADCY8	ADCY3	1.45674	0.974118	same	mmusculus	DIV10DIV3
ADCY5	ADCY3	1.01768	0.974118	same	mmusculus	DIV10DIV3
GUCY1B1	ADCY3	1.51379	0.974118	same	mmusculus	DIV10DIV3
PTPRA	PTPRZ1	0.693595	0.715479	same	mmusculus	DIV10DIV3
PTPN2	PTPRZ1	-0.855354	0.715479	opposite	mmusculus	DIV10DIV3
PTPRN2	PTPRZ1	1.40545	0.715479	same	mmusculus	DIV10DIV3
PTPRF	PTPRZ1	0.959329	0.715479	same	mmusculus	DIV10DIV3
PTPRS	PTPRZ1	0.940397	0.715479	same	mmusculus	DIV10DIV3
PTPRD	PTPRZ1	1.0235	0.715479	same	mmusculus	DIV10DIV3
PTPRT	PTPRZ1	0.734897	0.715479	same	mmusculus	DIV10DIV3
PTPRE	PTPRZ1	1.67223	0.715479	same	mmusculus	DIV10DIV3
SORD	PTGR1	0.715673	-0.608935	opposite	mmusculus	DIV10DIV3
VAT1L	PTGR1	1.33788	-0.608935	opposite	mmusculus	DIV10DIV3
PPIL2	PPIL3	-1.52913	-0.612669	same	mmusculus	DIV10DIV3
PPWD1	PPIL3	-1.08372	-0.612669	same	mmusculus	DIV10DIV3
PPIF	PPIL3	-0.750633	-0.612669	same	mmusculus	DIV10DIV3
PPIA	PPIL3	0.628919	-0.612669	opposite	mmusculus	DIV10DIV3
NKTR	PPIL3	-0.988559	-0.612669	same	mmusculus	DIV10DIV3
CWC27	PPIL3	-0.942093	-0.612669	same	mmusculus	DIV10DIV3
PPIG	PPIL3	-0.629086	-0.612669	same	mmusculus	DIV10DIV3
PPIL4	PPIL3	-1.1597	-0.612669	same	mmusculus	DIV10DIV3
PPIE	PPIL3	-1.76506	-0.612669	same	mmusculus	DIV10DIV3
PPIH	PPIL3	-0.657139	-0.612669	same	mmusculus	DIV10DIV3
GM7879	PPIL3	-0.657139	-0.612669	same	mmusculus	DIV10DIV3
CXADR	CLMP	0.840231	0.655051	same	mmusculus	DIV10DIV3
JAM2	CLMP	0.632259	0.655051	same	mmusculus	DIV10DIV3
EP400	CHD2	-1.04471	-0.998261	same	mmusculus	DIV10DIV3
CHD8	CHD2	-1.21157	-0.998261	same	mmusculus	DIV10DIV3
CHD9	CHD2	-0.824631	-0.998261	same	mmusculus	DIV10DIV3
SMARCA5	CHD2	-1.55376	-0.998261	same	mmusculus	DIV10DIV3
ATRX	CHD2	-0.827577	-0.998261	same	mmusculus	DIV10DIV3
SMARCA1	CHD2	-0.882996	-0.998261	same	mmusculus	DIV10DIV3
CHD1	CHD2	-1.06803	-0.998261	same	mmusculus	DIV10DIV3
INO80	CHD2	-1.10435	-0.998261	same	mmusculus	DIV10DIV3
SMARCA4	CHD2	-1.21147	-0.998261	same	mmusculus	DIV10DIV3
CHD4	CHD2	-1.21223	-0.998261	same	mmusculus	DIV10DIV3
MINK1	STRADA	1.37538	0.679001	same	mmusculus	DIV10DIV3
PAK3	STRADA	0.86101	0.679001	same	mmusculus	DIV10DIV3
STK24	STRADA	0.588681	0.679001	same	mmusculus	DIV10DIV3
ADCY9	ADCY5	0.792302	1.01768	same	mmusculus	DIV10DIV3
GUCY1A1	ADCY5	1.18296	1.01768	same	mmusculus	DIV10DIV3
ADCY1	ADCY5	1.58061	1.01768	same	mmusculus	DIV10DIV3
ADCY8	ADCY5	1.45674	1.01768	same	mmusculus	DIV10DIV3
ADCY3	ADCY5	0.974118	1.01768	same	mmusculus	DIV10DIV3
GUCY1B1	ADCY5	1.51379	1.01768	same	mmusculus	DIV10DIV3
DNAJC17	DNAJC7	-0.662854	-0.590325	same	mmusculus	DIV10DIV3
DNAJC24	DNAJC7	0.686447	-0.590325	opposite	mmusculus	DIV10DIV3
DNAJC9	DNAJC7	-0.640236	-0.590325	same	mmusculus	DIV10DIV3
DNAJC11	DNAJC7	-0.644121	-0.590325	same	mmusculus	DIV10DIV3
DNAJC10	DNAJC7	-0.801841	-0.590325	same	mmusculus	DIV10DIV3
BCL7B	BCL7A	-0.758787	-1.38311	same	mmusculus	DIV10DIV3
TENM4	TENM1	0.774538	0.683471	same	mmusculus	DIV10DIV3
MID1	TRIM24	-0.94478	-0.861815	same	mmusculus	DIV10DIV3
TRIM3	TRIM24	1.44513	-0.861815	opposite	mmusculus	DIV10DIV3
TRIM28	TRIM24	-1.25047	-0.861815	same	mmusculus	DIV10DIV3
TRIM41	TRIM24	-0.634175	-0.861815	same	mmusculus	DIV10DIV3
TRIM2	TRIM24	1.00148	-0.861815	opposite	mmusculus	DIV10DIV3
CNTN3	CHL1	1.07014	1.1584	same	mmusculus	DIV10DIV3
CNTN6	CHL1	1.26179	1.1584	same	mmusculus	DIV10DIV3
NFASC	CHL1	0.849798	1.1584	same	mmusculus	DIV10DIV3
NRCAM	CHL1	0.86617	1.1584	same	mmusculus	DIV10DIV3
IGSF21	CHL1	1.05548	1.1584	same	mmusculus	DIV10DIV3
CNTN2	CHL1	-0.690733	1.1584	opposite	mmusculus	DIV10DIV3
NCAM2	CHL1	1.11305	1.1584	same	mmusculus	DIV10DIV3
CNTN5	CHL1	1.12944	1.1584	same	mmusculus	DIV10DIV3
VCAM1	CHL1	1.6122	1.1584	same	mmusculus	DIV10DIV3
CNTN1	CHL1	1.35973	1.1584	same	mmusculus	DIV10DIV3
ACAT2	ACAA2	1.16494	0.589841	same	mmusculus	DIV10DIV3
DRAP1	NFYC	-0.717961	-0.698276	same	mmusculus	DIV10DIV3
MSN	FRMD4A	-0.611004	0.725221	opposite	mmusculus	DIV10DIV3
RDX	FRMD4A	-0.591536	0.725221	opposite	mmusculus	DIV10DIV3
RBM12	HNRNPH1	-0.607281	-0.660128	same	mmusculus	DIV10DIV3
ALDH1L1	ALDH1B1	2.00128	0.669216	same	mmusculus	DIV10DIV3
ALDH1L2	ALDH1B1	-0.700947	0.669216	opposite	mmusculus	DIV10DIV3
CNNM4	CNNM2	1.01161	1.05187	same	mmusculus	DIV10DIV3
CYFIP1	CYFIP2	-0.705995	0.707117	opposite	mmusculus	DIV10DIV3
SHANK3	SHANK1	1.5262	0.841479	same	mmusculus	DIV10DIV3
SHANK2	SHANK1	1.031	0.841479	same	mmusculus	DIV10DIV3
ADD1	ADD2	0.583324	0.740775	same	mmusculus	DIV10DIV3
TSPAN9	CD63	1.49045	1.65165	same	mmusculus	DIV10DIV3
TSPAN7	CD63	1.88994	1.65165	same	mmusculus	DIV10DIV3
CD81	CD63	1.92645	1.65165	same	mmusculus	DIV10DIV3
DIRAS2	NKIRAS2	1.64502	0.688465	same	mmusculus	DIV10DIV3
MRAS	NKIRAS2	1.23986	0.688465	same	mmusculus	DIV10DIV3
KRAS	NKIRAS2	0.640414	0.688465	same	mmusculus	DIV10DIV3
RAP2B	NKIRAS2	0.613615	0.688465	same	mmusculus	DIV10DIV3
RALA	NKIRAS2	0.720643	0.688465	same	mmusculus	DIV10DIV3
RALB	NKIRAS2	1.4658	0.688465	same	mmusculus	DIV10DIV3
RAP1A	NKIRAS2	0.647331	0.688465	same	mmusculus	DIV10DIV3
DIRAS1	NKIRAS2	1.45921	0.688465	same	mmusculus	DIV10DIV3
RHEB	NKIRAS2	0.933074	0.688465	same	mmusculus	DIV10DIV3
CPSF1	SF3B3	-1.5352	-1.44927	same	mmusculus	DIV10DIV3
NPM1	NPM3	-0.78651	-1.48365	same	mmusculus	DIV10DIV3
ZFP260	ZFP629	-1.49901	-1.12823	same	mmusculus	DIV10DIV3
ZFP637	ZFP629	-2.41002	-1.12823	same	mmusculus	DIV10DIV3
ZFP354C	ZFP629	-2.16381	-1.12823	same	mmusculus	DIV10DIV3
ARPC5L	ARPC5	0.603364	0.850154	same	mmusculus	DIV10DIV3
DDX51	DDX42	-1.31954	-0.841147	same	mmusculus	DIV10DIV3
EIF4A3	DDX42	-1.0349	-0.841147	same	mmusculus	DIV10DIV3
DDX59	DDX42	-0.72112	-0.841147	same	mmusculus	DIV10DIV3
DDX41	DDX42	-0.976506	-0.841147	same	mmusculus	DIV10DIV3
DDX18	DDX42	-1.14439	-0.841147	same	mmusculus	DIV10DIV3
DDX21	DDX42	-1.43888	-0.841147	same	mmusculus	DIV10DIV3
[truncated: 33,577 more rows]

## Sheet: GOEnrichment (ORA)
GO.ID	Term	Annotated	Significant	Expected	classic	p.adjust	organism	condition
GO:0044267	cellular protein metabolic process	396	160	113.96	8.4e-10	6e-08	mmusculus	DIV10DIV3
GO:0019538	protein metabolic process	423	168	121.73	1.2e-09	6e-08	mmusculus	DIV10DIV3
GO:1901564	organonitrogen compound metabolic proces...	484	186	139.28	2e-09	6.66667e-08	mmusculus	DIV10DIV3
GO:0006464	cellular protein modification process	339	139	97.55	8.2e-09	1.64e-07	mmusculus	DIV10DIV3
GO:0036211	protein modification process	339	139	97.55	8.2e-09	1.64e-07	mmusculus	DIV10DIV3
GO:0000413	protein peptidyl-prolyl isomerization	14	14	4.03	2.2e-08	2.3e-07	mmusculus	DIV10DIV3
GO:0018208	peptidyl-proline modification	14	14	4.03	2.2e-08	2.3e-07	mmusculus	DIV10DIV3
GO:1901565	organonitrogen compound catabolic proces...	92	51	26.47	2.3e-08	2.3e-07	mmusculus	DIV10DIV3
GO:0006511	ubiquitin-dependent protein catabolic pr...	52	34	14.96	2.3e-08	2.3e-07	mmusculus	DIV10DIV3
GO:0019941	modification-dependent protein catabolic...	52	34	14.96	2.3e-08	2.3e-07	mmusculus	DIV10DIV3
GO:0043412	macromolecule modification	348	139	100.14	7.4e-08	6.72727e-07	mmusculus	DIV10DIV3
GO:0030163	protein catabolic process	75	43	21.58	9e-08	7.5e-07	mmusculus	DIV10DIV3
GO:0044257	cellular protein catabolic process	65	38	18.71	2.7e-07	2e-06	mmusculus	DIV10DIV3
GO:0051603	proteolysis involved in cellular protein...	58	35	16.69	2.8e-07	2e-06	mmusculus	DIV10DIV3
GO:0043632	modification-dependent macromolecule cat...	56	34	16.12	3.5e-07	2.33333e-06	mmusculus	DIV10DIV3
GO:0070647	protein modification by small protein co...	76	42	21.87	5.3e-07	3.3125e-06	mmusculus	DIV10DIV3
GO:0043161	proteasome-mediated ubiquitin-dependent ...	32	22	9.21	2.4e-06	1.33333e-05	mmusculus	DIV10DIV3
GO:0006508	proteolysis	100	50	28.78	2.4e-06	1.33333e-05	mmusculus	DIV10DIV3
GO:0006470	protein dephosphorylation	31	21	8.92	6e-06	3.15789e-05	mmusculus	DIV10DIV3
GO:0000209	protein polyubiquitination	19	15	5.47	7.2e-06	3.6e-05	mmusculus	DIV10DIV3
GO:0001755	neural crest cell migration	9	9	2.59	1.3e-05	6.19048e-05	mmusculus	DIV10DIV3
GO:0032446	protein modification by small protein co...	63	34	18.13	1.5e-05	6.81818e-05	mmusculus	DIV10DIV3
GO:0006457	protein folding	24	17	6.91	2e-05	8.69565e-05	mmusculus	DIV10DIV3
GO:0010498	proteasomal protein catabolic process	40	24	11.51	2.8e-05	0.000116667	mmusculus	DIV10DIV3
GO:0016567	protein ubiquitination	51	28	14.68	5.8e-05	0.000232	mmusculus	DIV10DIV3
GO:0018193	peptidyl-amino acid modification	156	66	44.89	7.6e-05	0.000292308	mmusculus	DIV10DIV3
GO:0016310	phosphorylation	210	84	60.43	8.2e-05	0.000303704	mmusculus	DIV10DIV3
GO:0006468	protein phosphorylation	172	71	49.5	0.0001	0.000357143	mmusculus	DIV10DIV3
GO:0006904	vesicle docking involved in exocytosis	14	11	4.03	0.00015	0.000516129	mmusculus	DIV10DIV3
GO:0007155	cell adhesion	130	56	37.41	0.00016	0.000516129	mmusculus	DIV10DIV3
GO:0022610	biological adhesion	130	56	37.41	0.00016	0.000516129	mmusculus	DIV10DIV3
GO:1901575	organic substance catabolic process	163	67	46.91	0.0002	0.000606061	mmusculus	DIV10DIV3
GO:0051179	localization	564	191	162.3	0.0002	0.000606061	mmusculus	DIV10DIV3
GO:0061387	regulation of extent of cell growth	21	14	6.04	0.00031	0.000911765	mmusculus	DIV10DIV3
GO:0032434	regulation of proteasomal ubiquitin-depe...	15	11	4.32	0.00042	0.00116667	mmusculus	DIV10DIV3
GO:0031344	regulation of cell projection organizati...	128	54	36.83	0.00042	0.00116667	mmusculus	DIV10DIV3
GO:0016311	dephosphorylation	48	25	13.81	0.00045	0.00121622	mmusculus	DIV10DIV3
GO:0006796	phosphate-containing compound metabolic ...	273	101	78.56	0.00054	0.00142105	mmusculus	DIV10DIV3
GO:0031345	negative regulation of cell projection o...	36	20	10.36	0.00058	0.00148718	mmusculus	DIV10DIV3
GO:0006793	phosphorus metabolic process	274	101	78.85	0.00064	0.00156098	mmusculus	DIV10DIV3
GO:0044265	cellular macromolecule catabolic process	98	43	28.2	0.00064	0.00156098	mmusculus	DIV10DIV3
GO:0120035	regulation of plasma membrane bounded ce...	127	53	36.55	0.00067	0.00159524	mmusculus	DIV10DIV3
GO:0048638	regulation of developmental growth	44	23	12.66	0.00072	0.00167442	mmusculus	DIV10DIV3
GO:0009057	macromolecule catabolic process	113	48	32.52	0.00076	0.00172727	mmusculus	DIV10DIV3
GO:0032535	regulation of cellular component size	60	29	17.27	0.0008	0.00177778	mmusculus	DIV10DIV3
GO:0006810	transport	439	151	126.33	0.00084	0.00182609	mmusculus	DIV10DIV3
GO:0008361	regulation of cell size	32	18	9.21	0.0009	0.00188	mmusculus	DIV10DIV3
GO:0045665	negative regulation of neuron differenti...	37	20	10.65	0.00092	0.00188	mmusculus	DIV10DIV3
GO:0019079	viral genome replication	8	7	2.3	0.00094	0.00188	mmusculus	DIV10DIV3
GO:0050922	negative regulation of chemotaxis	8	7	2.3	0.00094	0.00188	mmusculus	DIV10DIV3
GO:0032102	negative regulation of response to exter...	25	15	7.19	0.00099	0.00194118	mmusculus	DIV10DIV3
GO:0034976	response to endoplasmic reticulum stress	14	10	4.03	0.00109	0.00198276	mmusculus	DIV10DIV3
GO:0010977	negative regulation of neuron projection...	30	17	8.63	0.00112	0.00198276	mmusculus	DIV10DIV3
GO:0030517	negative regulation of axon extension	10	8	2.88	0.00112	0.00198276	mmusculus	DIV10DIV3
GO:0042176	regulation of protein catabolic process	40	21	11.51	0.00114	0.00198276	mmusculus	DIV10DIV3
GO:0014031	mesenchymal cell development	12	9	3.45	0.00115	0.00198276	mmusculus	DIV10DIV3
GO:0014032	neural crest cell development	12	9	3.45	0.00115	0.00198276	mmusculus	DIV10DIV3
GO:0014033	neural crest cell differentiation	12	9	3.45	0.00115	0.00198276	mmusculus	DIV10DIV3
GO:0051234	establishment of localization	449	153	129.21	0.00129	0.00216667	mmusculus	DIV10DIV3
GO:0030030	cell projection organization	206	78	59.28	0.0013	0.00216667	mmusculus	DIV10DIV3
GO:0018105	peptidyl-serine phosphorylation	43	22	12.37	0.00137	0.00220968	mmusculus	DIV10DIV3
GO:0018209	peptidyl-serine modification	43	22	12.37	0.00137	0.00220968	mmusculus	DIV10DIV3
GO:0010769	regulation of cell morphogenesis involve...	59	28	16.98	0.00142	0.00225397	mmusculus	DIV10DIV3
GO:0120036	plasma membrane bounded cell projection ...	204	77	58.71	0.00157	0.00244615	mmusculus	DIV10DIV3
GO:0001667	ameboidal-type cell migration	46	23	13.24	0.00159	0.00244615	mmusculus	DIV10DIV3
GO:0030516	regulation of axon extension	19	12	5.47	0.00176	0.00266667	mmusculus	DIV10DIV3
GO:0048583	regulation of response to stimulus	313	111	90.07	0.00179	0.00267164	mmusculus	DIV10DIV3
GO:0044248	cellular catabolic process	162	63	46.62	0.00191	0.00271831	mmusculus	DIV10DIV3
GO:0035335	peptidyl-tyrosine dephosphorylation	5	5	1.44	0.00193	0.00271831	mmusculus	DIV10DIV3
GO:0048668	collateral sprouting	5	5	1.44	0.00193	0.00271831	mmusculus	DIV10DIV3
GO:0070816	phosphorylation of RNA polymerase II C-t...	5	5	1.44	0.00193	0.00271831	mmusculus	DIV10DIV3
GO:0045732	positive regulation of protein catabolic...	17	11	4.89	0.00209	0.00286301	mmusculus	DIV10DIV3
GO:2000058	regulation of ubiquitin-dependent protei...	17	11	4.89	0.00209	0.00286301	mmusculus	DIV10DIV3
GO:0090066	regulation of anatomical structure size	69	31	19.86	0.00243	0.00326667	mmusculus	DIV10DIV3
GO:0009056	catabolic process	188	71	54.1	0.00245	0.00326667	mmusculus	DIV10DIV3
GO:0060485	mesenchyme development	22	13	6.33	0.00266	0.0034359	mmusculus	DIV10DIV3
GO:0098656	anion transmembrane transport	22	13	6.33	0.00266	0.0034359	mmusculus	DIV10DIV3
GO:0031175	neuron projection development	170	65	48.92	0.00268	0.0034359	mmusculus	DIV10DIV3
GO:0008038	neuron recognition	13	9	3.74	0.0028	0.0035	mmusculus	DIV10DIV3
GO:0048864	stem cell development	13	9	3.74	0.0028	0.0035	mmusculus	DIV10DIV3
GO:0048843	negative regulation of axon extension in...	7	6	2.01	0.00292	0.00350549	mmusculus	DIV10DIV3
GO:1902668	negative regulation of axon guidance	7	6	2.01	0.00292	0.00350549	mmusculus	DIV10DIV3
GO:0061564	axon development	81	35	23.31	0.00293	0.00350549	mmusculus	DIV10DIV3
GO:0016579	protein deubiquitination	11	8	3.17	0.00309	0.00350549	mmusculus	DIV10DIV3
GO:0009306	protein secretion	56	26	16.12	0.00311	0.00350549	mmusculus	DIV10DIV3
GO:0035592	establishment of protein localization to...	56	26	16.12	0.00311	0.00350549	mmusculus	DIV10DIV3
GO:0071692	protein localization to extracellular re...	56	26	16.12	0.00311	0.00350549	mmusculus	DIV10DIV3
GO:0007219	Notch signaling pathway	9	7	2.59	0.00319	0.00350549	mmusculus	DIV10DIV3
GO:0031102	neuron projection regeneration	9	7	2.59	0.00319	0.00350549	mmusculus	DIV10DIV3
GO:0032233	positive regulation of actin filament bu...	9	7	2.59	0.00319	0.00350549	mmusculus	DIV10DIV3
GO:0048841	regulation of axon extension involved in...	9	7	2.59	0.00319	0.00350549	mmusculus	DIV10DIV3
GO:0048588	developmental cell growth	40	20	11.51	0.00323	0.00351087	mmusculus	DIV10DIV3
GO:0001678	cellular glucose homeostasis	25	14	7.19	0.00363	0.0038617	mmusculus	DIV10DIV3
GO:0050821	protein stabilization	25	14	7.19	0.00363	0.0038617	mmusculus	DIV10DIV3
GO:0007167	enzyme linked receptor protein signaling...	65	29	18.71	0.00381	0.00401053	mmusculus	DIV10DIV3
GO:0051246	regulation of protein metabolic process	235	85	67.63	0.00391	0.00407292	mmusculus	DIV10DIV3
GO:0048278	vesicle docking	18	11	5.18	0.00401	0.00413402	mmusculus	DIV10DIV3
GO:0051170	import into nucleus	23	13	6.62	0.00455	0.00464286	mmusculus	DIV10DIV3
GO:0060560	developmental growth involved in morphog...	41	20	11.8	0.00466	0.00470707	mmusculus	DIV10DIV3
GO:0007169	transmembrane receptor protein tyrosine ...	44	21	12.66	0.00521	0.00521	mmusculus	DIV10DIV3
GO:0022406	membrane docking	24	19	9.16	4.3e-05	0.0023	mmusculus	DIV3DIV0
GO:0006470	protein dephosphorylation	39	27	14.88	6.4e-05	0.0023	mmusculus	DIV3DIV0
GO:0048278	vesicle docking	23	18	8.78	9.2e-05	0.0023	mmusculus	DIV3DIV0
GO:0140056	organelle localization by membrane tethe...	23	18	8.78	9.2e-05	0.0023	mmusculus	DIV3DIV0
GO:0016311	dephosphorylation	49	31	18.7	0.00025	0.005	mmusculus	DIV3DIV0
GO:0055114	oxidation-reduction process	94	52	35.87	0.00033	0.005125	mmusculus	DIV3DIV0
GO:0045333	cellular respiration	21	16	8.01	0.0004	0.005125	mmusculus	DIV3DIV0
GO:0006091	generation of precursor metabolites and ...	52	32	19.84	0.00041	0.005125	mmusculus	DIV3DIV0
GO:0006886	intracellular protein transport	111	59	42.36	0.00055	0.00611111	mmusculus	DIV3DIV0
GO:0006904	vesicle docking involved in exocytosis	18	14	6.87	0.00068	0.00654545	mmusculus	DIV3DIV0
GO:0051301	cell division	49	30	18.7	0.00072	0.00654545	mmusculus	DIV3DIV0
GO:0055081	anion homeostasis	10	9	3.82	0.00108	0.00821429	mmusculus	DIV3DIV0
GO:0006323	DNA packaging	15	12	5.72	0.00111	0.00821429	mmusculus	DIV3DIV0
GO:0090307	mitotic spindle assembly	7	7	2.67	0.00115	0.00821429	mmusculus	DIV3DIV0
GO:0008152	metabolic process	754	312	287.73	0.00202	0.01295	mmusculus	DIV3DIV0
GO:0007017	microtubule-based process	62	35	23.66	0.00208	0.01295	mmusculus	DIV3DIV0
GO:0015833	peptide transport	203	96	77.47	0.00234	0.01295	mmusculus	DIV3DIV0
GO:0042886	amide transport	203	96	77.47	0.00234	0.01295	mmusculus	DIV3DIV0
GO:0006414	translational elongation	9	8	3.43	0.00259	0.01295	mmusculus	DIV3DIV0
GO:0007052	mitotic spindle organization	9	8	3.43	0.00259	0.01295	mmusculus	DIV3DIV0
GO:0015031	protein transport	199	94	75.94	0.00275	0.0130952	mmusculus	DIV3DIV0
GO:0010664	negative regulation of striated muscle c...	6	6	2.29	0.00303	0.0131739	mmusculus	DIV3DIV0
GO:0010807	regulation of synaptic vesicle priming	6	6	2.29	0.00303	0.0131739	mmusculus	DIV3DIV0
GO:0070647	protein modification by small protein co...	61	34	23.28	0.00322	0.0134167	mmusculus	DIV3DIV0
GO:0140014	mitotic nuclear division	20	14	7.63	0.00367	0.0134242	mmusculus	DIV3DIV0
GO:0000280	nuclear division	22	15	8.4	0.0039	0.0134242	mmusculus	DIV3DIV0
GO:0006796	phosphate-containing compound metabolic ...	279	126	106.47	0.00399	0.0134242	mmusculus	DIV3DIV0
GO:0007018	microtubule-based movement	34	21	12.97	0.00401	0.0134242	mmusculus	DIV3DIV0
GO:0046034	ATP metabolic process	32	20	12.21	0.00409	0.0134242	mmusculus	DIV3DIV0
GO:0015980	energy derivation by oxidation of organi...	30	19	11.45	0.00414	0.0134242	mmusculus	DIV3DIV0
GO:0044237	cellular metabolic process	690	286	263.31	0.00426	0.0134242	mmusculus	DIV3DIV0
GO:0006464	cellular protein modification process	292	131	111.43	0.00443	0.0134242	mmusculus	DIV3DIV0
GO:0036211	protein modification process	292	131	111.43	0.00443	0.0134242	mmusculus	DIV3DIV0
GO:0006333	chromatin assembly or disassembly	13	10	4.96	0.00505	0.0142045	mmusculus	DIV3DIV0
GO:0007030	Golgi organization	13	10	4.96	0.00505	0.0142045	mmusculus	DIV3DIV0
GO:0043412	macromolecule modification	298	133	113.72	0.00523	0.0142045	mmusculus	DIV3DIV0
GO:0033673	negative regulation of kinase activity	15	11	5.72	0.0059	0.0142045	mmusculus	DIV3DIV0
GO:0051348	negative regulation of transferase activ...	15	11	5.72	0.0059	0.0142045	mmusculus	DIV3DIV0
GO:0061077	chaperone-mediated protein folding	15	11	5.72	0.0059	0.0142045	mmusculus	DIV3DIV0
GO:0010662	regulation of striated muscle cell apopt...	8	7	3.05	0.00614	0.0142045	mmusculus	DIV3DIV0
GO:0035335	peptidyl-tyrosine dephosphorylation	8	7	3.05	0.00614	0.0142045	mmusculus	DIV3DIV0
GO:0016310	phosphorylation	196	91	74.8	0.0062	0.0142045	mmusculus	DIV3DIV0
GO:0045184	establishment of protein localization	213	98	81.28	0.00624	0.0142045	mmusculus	DIV3DIV0
GO:0000226	microtubule cytoskeleton organization	37	22	14.12	0.00625	0.0142045	mmusculus	DIV3DIV0
GO:0006793	phosphorus metabolic process	282	126	107.61	0.00648	0.0144	mmusculus	DIV3DIV0
GO:0071103	DNA conformation change	19	13	7.25	0.00695	0.0145833	mmusculus	DIV3DIV0
GO:1900076	regulation of cellular response to insul...	19	13	7.25	0.00695	0.0145833	mmusculus	DIV3DIV0
GO:0071705	nitrogen compound transport	243	110	92.73	0.007	0.0145833	mmusculus	DIV3DIV0
GO:0002931	response to ischemia	5	5	1.91	0.00799	0.0148793	mmusculus	DIV3DIV0
GO:0010667	negative regulation of cardiac muscle ce...	5	5	1.91	0.00799	0.0148793	mmusculus	DIV3DIV0
GO:0019674	NAD metabolic process	5	5	1.91	0.00799	0.0148793	mmusculus	DIV3DIV0
GO:0010611	regulation of cardiac muscle hypertrophy	10	8	3.82	0.00863	0.0148793	mmusculus	DIV3DIV0
GO:0014743	regulation of muscle hypertrophy	10	8	3.82	0.00863	0.0148793	mmusculus	DIV3DIV0
GO:0016579	protein deubiquitination	10	8	3.82	0.00863	0.0148793	mmusculus	DIV3DIV0
GO:0019882	antigen processing and presentation	10	8	3.82	0.00863	0.0148793	mmusculus	DIV3DIV0
GO:0031497	chromatin assembly	10	8	3.82	0.00863	0.0148793	mmusculus	DIV3DIV0
GO:0070646	protein modification by small protein re...	10	8	3.82	0.00863	0.0148793	mmusculus	DIV3DIV0
GO:1902850	microtubule cytoskeleton organization in...	10	8	3.82	0.00863	0.0148793	mmusculus	DIV3DIV0
GO:0044267	cellular protein metabolic process	385	166	146.92	0.00951	0.0161186	mmusculus	DIV3DIV0
GO:0044238	primary metabolic process	661	272	252.24	0.0116	0.0183594	mmusculus	DIV3DIV0
GO:0006469	negative regulation of protein kinase ac...	14	10	5.34	0.01169	0.0183594	mmusculus	DIV3DIV0
GO:0043648	dicarboxylic acid metabolic process	14	10	5.34	0.01169	0.0183594	mmusculus	DIV3DIV0
GO:0045454	cell redox homeostasis	14	10	5.34	0.01169	0.0183594	mmusculus	DIV3DIV0
GO:0071702	organic substance transport	276	122	105.32	0.01175	0.0183594	mmusculus	DIV3DIV0
GO:0048285	organelle fission	28	17	10.69	0.01208	0.0185571	mmusculus	DIV3DIV0
GO:0046626	regulation of insulin receptor signaling...	16	11	6.11	0.01247	0.0185571	mmusculus	DIV3DIV0
GO:0001678	cellular glucose homeostasis	26	16	9.92	0.01247	0.0185571	mmusculus	DIV3DIV0
GO:0071345	cellular response to cytokine stimulus	54	29	20.61	0.01277	0.0185571	mmusculus	DIV3DIV0
GO:0016052	carbohydrate catabolic process	18	12	6.87	0.01289	0.0185571	mmusculus	DIV3DIV0
GO:0006090	pyruvate metabolic process	22	14	8.4	0.01299	0.0185571	mmusculus	DIV3DIV0
GO:0006996	organelle organization	302	132	115.25	0.01363	0.0189868	mmusculus	DIV3DIV0
GO:0006334	nucleosome assembly	7	6	2.67	0.01432	0.0189868	mmusculus	DIV3DIV0
GO:0010665	regulation of cardiac muscle cell apopto...	7	6	2.67	0.01432	0.0189868	mmusculus	DIV3DIV0
GO:0030252	growth hormone secretion	7	6	2.67	0.01432	0.0189868	mmusculus	DIV3DIV0
GO:0032091	negative regulation of protein binding	7	6	2.67	0.01432	0.0189868	mmusculus	DIV3DIV0
GO:0051276	chromosome organization	77	39	29.38	0.01443	0.0189868	mmusculus	DIV3DIV0
GO:0006325	chromatin organization	55	29	20.99	0.01749	0.02115	mmusculus	DIV3DIV0
GO:0046907	intracellular transport	161	74	61.44	0.01854	0.02115	mmusculus	DIV3DIV0
GO:0010658	striated muscle cell apoptotic process	9	7	3.43	0.01854	0.02115	mmusculus	DIV3DIV0
GO:0043122	regulation of I-kappaB kinase/NF-kappaB ...	9	7	3.43	0.01854	0.02115	mmusculus	DIV3DIV0
GO:0051225	spindle assembly	9	7	3.43	0.01854	0.02115	mmusculus	DIV3DIV0
GO:1900077	negative regulation of cellular response...	9	7	3.43	0.01854	0.02115	mmusculus	DIV3DIV0
GO:0000731	DNA synthesis involved in DNA repair	4	4	1.53	0.02104	0.02115	mmusculus	DIV3DIV0
GO:0006007	glucose catabolic process	4	4	1.53	0.02104	0.02115	mmusculus	DIV3DIV0
GO:0010829	negative regulation of glucose transmemb...	4	4	1.53	0.02104	0.02115	mmusculus	DIV3DIV0
GO:0015810	aspartate transmembrane transport	4	4	1.53	0.02104	0.02115	mmusculus	DIV3DIV0
GO:0019320	hexose catabolic process	4	4	1.53	0.02104	0.02115	mmusculus	DIV3DIV0
GO:0030521	androgen receptor signaling pathway	4	4	1.53	0.02104	0.02115	mmusculus	DIV3DIV0
GO:0035970	peptidyl-threonine dephosphorylation	4	4	1.53	0.02104	0.02115	mmusculus	DIV3DIV0
GO:0043649	dicarboxylic acid catabolic process	4	4	1.53	0.02104	0.02115	mmusculus	DIV3DIV0
GO:0046365	monosaccharide catabolic process	4	4	1.53	0.02104	0.02115	mmusculus	DIV3DIV0
GO:0051302	regulation of cell division	4	4	1.53	0.02104	0.02115	mmusculus	DIV3DIV0
GO:0055064	chloride ion homeostasis	4	4	1.53	0.02104	0.02115	mmusculus	DIV3DIV0
GO:0055083	monovalent inorganic anion homeostasis	4	4	1.53	0.02104	0.02115	mmusculus	DIV3DIV0
GO:0060612	adipose tissue development	4	4	1.53	0.02104	0.02115	mmusculus	DIV3DIV0
GO:0070262	peptidyl-serine dephosphorylation	4	4	1.53	0.02104	0.02115	mmusculus	DIV3DIV0
GO:0099010	modification of postsynaptic structure	4	4	1.53	0.02104	0.02115	mmusculus	DIV3DIV0
GO:1901264	carbohydrate derivative transport	4	4	1.53	0.02104	0.02115	mmusculus	DIV3DIV0
GO:0000910	cytokinesis	11	8	4.2	0.02115	0.02115	mmusculus	DIV3DIV0
GO:0022900	electron transport chain	11	8	4.2	0.02115	0.02115	mmusculus	DIV3DIV0
GO:0016579	protein deubiquitination	21	20	7.93	4e-08	4e-06	mmusculus	DIV10DIV0
GO:0006470	protein dephosphorylation	49	36	18.49	2.9e-07	1.075e-05	mmusculus	DIV10DIV0
GO:0006793	phosphorus metabolic process	435	209	164.17	3.9e-07	1.075e-05	mmusculus	DIV10DIV0
GO:0006796	phosphate-containing compound metabolic ...	433	208	163.41	4.3e-07	1.075e-05	mmusculus	DIV10DIV0
GO:0007010	cytoskeleton organization	243	125	91.71	2.3e-06	4.6e-05	mmusculus	DIV10DIV0
GO:0030036	actin cytoskeleton organization	135	76	50.95	4.4e-06	7.33333e-05	mmusculus	DIV10DIV0
GO:0030029	actin filament-based process	153	84	57.74	5.3e-06	7.5e-05	mmusculus	DIV10DIV0
GO:0016310	phosphorylation	324	158	122.28	6e-06	7.5e-05	mmusculus	DIV10DIV0
GO:1901564	organonitrogen compound metabolic proces...	769	335	290.22	1.1e-05	0.000122222	mmusculus	DIV10DIV0
GO:0006091	generation of precursor metabolites and ...	60	39	22.64	1.3e-05	0.00013	mmusculus	DIV10DIV0
GO:0070646	protein modification by small protein re...	25	20	9.43	1.8e-05	0.000163636	mmusculus	DIV10DIV0
GO:0000910	cytokinesis	22	18	8.3	2.7e-05	0.000225	mmusculus	DIV10DIV0
GO:0018105	peptidyl-serine phosphorylation	72	44	27.17	3.6e-05	0.000264286	mmusculus	DIV10DIV0
GO:0032869	cellular response to insulin stimulus	48	32	18.12	3.7e-05	0.000264286	mmusculus	DIV10DIV0
GO:0044281	small molecule metabolic process	212	107	80.01	4.3e-05	0.000286667	mmusculus	DIV10DIV0
GO:0007017	microtubule-based process	142	76	53.59	5.2e-05	0.000323529	mmusculus	DIV10DIV0
GO:0055114	oxidation-reduction process	120	66	45.29	5.5e-05	0.000323529	mmusculus	DIV10DIV0
GO:0007018	microtubule-based movement	63	39	23.78	6.7e-05	0.00036	mmusculus	DIV10DIV0
GO:0071375	cellular response to peptide hormone sti...	53	34	20	7e-05	0.00036	mmusculus	DIV10DIV0
GO:0044267	cellular protein metabolic process	624	274	235.5	7.2e-05	0.00036	mmusculus	DIV10DIV0
GO:1900076	regulation of cellular response to insul...	23	18	8.68	8.2e-05	0.000377273	mmusculus	DIV10DIV0
GO:0046907	intracellular transport	264	128	99.63	8.3e-05	0.000377273	mmusculus	DIV10DIV0
GO:1901653	cellular response to peptide	64	39	24.15	0.00011	0.000478261	mmusculus	DIV10DIV0
GO:0032970	regulation of actin filament-based proce...	81	47	30.57	0.00012	0.00048	mmusculus	DIV10DIV0
GO:0032868	response to insulin	50	32	18.87	0.00012	0.00048	mmusculus	DIV10DIV0
GO:0018209	peptidyl-serine modification	75	44	28.3	0.00014	0.000538462	mmusculus	DIV10DIV0
GO:0006511	ubiquitin-dependent protein catabolic pr...	88	50	33.21	0.00016	0.000548387	mmusculus	DIV10DIV0
GO:0019941	modification-dependent protein catabolic...	88	50	33.21	0.00016	0.000548387	mmusculus	DIV10DIV0
GO:0044257	cellular protein catabolic process	112	61	42.27	0.00016	0.000548387	mmusculus	DIV10DIV0
GO:0061077	chaperone-mediated protein folding	12	11	4.53	0.00017	0.000548387	mmusculus	DIV10DIV0
GO:0019538	protein metabolic process	663	287	250.21	0.00017	0.000548387	mmusculus	DIV10DIV0
GO:0006508	proteolysis	169	86	63.78	0.00018	0.0005625	mmusculus	DIV10DIV0
GO:0043434	response to peptide hormone	57	35	21.51	0.0002	0.000606061	mmusculus	DIV10DIV0
GO:1902532	negative regulation of intracellular sig...	76	44	28.68	0.00022	0.000647059	mmusculus	DIV10DIV0
GO:0045333	cellular respiration	26	19	9.81	0.00025	0.000714286	mmusculus	DIV10DIV0
GO:0016311	dephosphorylation	70	41	26.42	0.00026	0.000722222	mmusculus	DIV10DIV0
GO:0009056	catabolic process	301	141	113.6	0.00028	0.00074359	mmusculus	DIV10DIV0
GO:0022408	negative regulation of cell-cell adhesio...	19	15	7.17	0.00029	0.00074359	mmusculus	DIV10DIV0
GO:0046626	regulation of insulin receptor signaling...	19	15	7.17	0.00029	0.00074359	mmusculus	DIV10DIV0
GO:0051603	proteolysis involved in cellular protein...	103	56	38.87	0.00031	0.000775	mmusculus	DIV10DIV0
GO:0016482	cytosolic transport	36	24	13.59	0.00036	0.000869565	mmusculus	DIV10DIV0
GO:0032956	regulation of actin cytoskeleton organiz...	71	41	26.8	0.00039	0.000869565	mmusculus	DIV10DIV0
GO:0006458	'de novo' protein folding	8	8	3.02	0.0004	0.000869565	mmusculus	DIV10DIV0
GO:0035335	peptidyl-tyrosine dephosphorylation	8	8	3.02	0.0004	0.000869565	mmusculus	DIV10DIV0
GO:0046854	phosphatidylinositol phosphorylation	8	8	3.02	0.0004	0.000869565	mmusculus	DIV10DIV0
GO:0051084	'de novo' posttranslational protein fold...	8	8	3.02	0.0004	0.000869565	mmusculus	DIV10DIV0
GO:0070647	protein modification by small protein co...	113	60	42.65	0.00045	0.000957447	mmusculus	DIV10DIV0
GO:0007015	actin filament organization	78	44	29.44	0.00049	0.00102083	mmusculus	DIV10DIV0
GO:0010256	endomembrane system organization	72	41	27.17	0.00058	0.00111321	mmusculus	DIV10DIV0
GO:1901652	response to peptide	72	41	27.17	0.00058	0.00111321	mmusculus	DIV10DIV0
GO:0110053	regulation of actin filament organizatio...	53	32	20	0.00059	0.00111321	mmusculus	DIV10DIV0
GO:0008286	insulin receptor signaling pathway	29	20	10.94	0.00059	0.00111321	mmusculus	DIV10DIV0
GO:0006468	protein phosphorylation	271	127	102.27	0.00059	0.00111321	mmusculus	DIV10DIV0
GO:0051261	protein depolymerization	31	21	11.7	0.00062	0.00114815	mmusculus	DIV10DIV0
GO:0030163	protein catabolic process	130	67	49.06	0.00064	0.00116364	mmusculus	DIV10DIV0
GO:0015980	energy derivation by oxidation of organi...	37	24	13.96	0.00067	0.00117544	mmusculus	DIV10DIV0
GO:0031032	actomyosin structure organization	41	26	15.47	0.00067	0.00117544	mmusculus	DIV10DIV0
GO:1901565	organonitrogen compound catabolic proces...	158	79	59.63	0.00071	0.00122414	mmusculus	DIV10DIV0
GO:0051234	establishment of localization	694	295	261.91	0.00073	0.00123729	mmusculus	DIV10DIV0
GO:1901617	organic hydroxy compound biosynthetic pr...	20	15	7.55	0.00075	0.00125	mmusculus	DIV10DIV0
GO:0006810	transport	672	286	253.61	0.00086	0.00140984	mmusculus	DIV10DIV0
GO:0097435	supramolecular fiber organization	129	66	48.68	0.00091	0.00146774	mmusculus	DIV10DIV0
GO:0015031	protein transport	303	139	114.35	0.00099	0.00157143	mmusculus	DIV10DIV0
GO:0045184	establishment of protein localization	323	147	121.9	0.00107	0.00164615	mmusculus	DIV10DIV0
GO:0051085	chaperone cofactor-dependent protein ref...	7	7	2.64	0.00107	0.00164615	mmusculus	DIV10DIV0
GO:0006464	cellular protein modification process	508	221	191.72	0.00113	0.00168657	mmusculus	DIV10DIV0
GO:0036211	protein modification process	508	221	191.72	0.00113	0.00168657	mmusculus	DIV10DIV0
GO:0043624	cellular protein complex disassembly	34	22	12.83	0.00119	0.00175	mmusculus	DIV10DIV0
GO:0051649	establishment of localization in cell	393	175	148.32	0.00121	0.00175362	mmusculus	DIV10DIV0
GO:0043632	modification-dependent macromolecule cat...	94	50	35.48	0.00129	0.00178082	mmusculus	DIV10DIV0
GO:0051492	regulation of stress fiber assembly	17	13	6.42	0.00129	0.00178082	mmusculus	DIV10DIV0
GO:0090307	mitotic spindle assembly	17	13	6.42	0.00129	0.00178082	mmusculus	DIV10DIV0
GO:1901575	organic substance catabolic process	251	117	94.73	0.0013	0.00178082	mmusculus	DIV10DIV0
GO:0032870	cellular response to hormone stimulus	83	45	31.32	0.00133	0.0017973	mmusculus	DIV10DIV0
GO:0042326	negative regulation of phosphorylation	70	39	26.42	0.00141	0.00188	mmusculus	DIV10DIV0
GO:0080135	regulation of cellular response to stres...	108	56	40.76	0.00149	0.00196053	mmusculus	DIV10DIV0
GO:0015833	peptide transport	308	140	116.24	0.00154	0.00197561	mmusculus	DIV10DIV0
GO:0031400	negative regulation of protein modificat...	97	51	36.61	0.00162	0.00197561	mmusculus	DIV10DIV0
GO:0035966	response to topologically incorrect prot...	12	10	4.53	0.00162	0.00197561	mmusculus	DIV10DIV0
GO:0035967	cellular response to topologically incor...	12	10	4.53	0.00162	0.00197561	mmusculus	DIV10DIV0
GO:0046627	negative regulation of insulin receptor ...	12	10	4.53	0.00162	0.00197561	mmusculus	DIV10DIV0
GO:1905897	regulation of response to endoplasmic re...	12	10	4.53	0.00162	0.00197561	mmusculus	DIV10DIV0
GO:0007052	mitotic spindle organization	21	15	7.93	0.00171	0.00203571	mmusculus	DIV10DIV0
GO:0032231	regulation of actin filament bundle asse...	21	15	7.93	0.00171	0.00203571	mmusculus	DIV10DIV0
GO:0042886	amide transport	309	140	116.62	0.00182	0.00214118	mmusculus	DIV10DIV0
GO:0032091	negative regulation of protein binding	23	16	8.68	0.00186	0.00216279	mmusculus	DIV10DIV0
GO:0043409	negative regulation of MAPK cascade	25	17	9.43	0.00197	0.00223596	mmusculus	DIV10DIV0
GO:1902850	microtubule cytoskeleton organization in...	25	17	9.43	0.00197	0.00223596	mmusculus	DIV10DIV0
GO:0030162	regulation of proteolysis	82	44	30.95	0.00199	0.00223596	mmusculus	DIV10DIV0
GO:0046034	ATP metabolic process	37	23	13.96	0.00204	0.00226667	mmusculus	DIV10DIV0
GO:0006082	organic acid metabolic process	123	62	46.42	0.0021	0.00230769	mmusculus	DIV10DIV0
GO:0051493	regulation of cytoskeleton organization	112	57	42.27	0.00239	0.00259783	mmusculus	DIV10DIV0
GO:0048583	regulation of response to stimulus	489	211	184.55	0.00264	0.00280851	mmusculus	DIV10DIV0
GO:0001933	negative regulation of protein phosphory...	63	35	23.78	0.00264	0.00280851	mmusculus	DIV10DIV0
GO:0000226	microtubule cytoskeleton organization	101	52	38.12	0.00268	0.00282105	mmusculus	DIV10DIV0
GO:0043412	macromolecule modification	520	223	196.25	0.00282	0.00285	mmusculus	DIV10DIV0
GO:0006418	tRNA aminoacylation for protein translat...	6	6	2.26	0.00285	0.00285	mmusculus	DIV10DIV0
GO:0015810	aspartate transmembrane transport	6	6	2.26	0.00285	0.00285	mmusculus	DIV10DIV0
GO:0042149	cellular response to glucose starvation	6	6	2.26	0.00285	0.00285	mmusculus	DIV10DIV0
GO:0043038	amino acid activation	6	6	2.26	0.00285	0.00285	mmusculus	DIV10DIV0
GO:0030258	lipid modification	22	17	5.61	2.9e-07	2.9e-05	rnorvegicus	DIV5.DIV1
GO:0019395	fatty acid oxidation	11	10	2.8	7.8e-06	0.00025	rnorvegicus	DIV5.DIV1
GO:0034440	lipid oxidation	11	10	2.8	7.8e-06	0.00025	rnorvegicus	DIV5.DIV1
GO:0055114	oxidation-reduction process	41	23	10.45	1.4e-05	0.00025	rnorvegicus	DIV5.DIV1
GO:0044281	small molecule metabolic process	84	38	21.41	1.5e-05	0.00025	rnorvegicus	DIV5.DIV1
GO:0044255	cellular lipid metabolic process	52	27	13.25	1.5e-05	0.00025	rnorvegicus	DIV5.DIV1
GO:0006635	fatty acid beta-oxidation	10	9	2.55	2.9e-05	0.000414286	rnorvegicus	DIV5.DIV1
GO:0032787	monocarboxylic acid metabolic process	40	21	10.19	0.00013	0.00155556	rnorvegicus	DIV5.DIV1
GO:0006631	fatty acid metabolic process	27	16	6.88	0.00014	0.00155556	rnorvegicus	DIV5.DIV1
GO:0044282	small molecule catabolic process	30	17	7.65	0.00018	0.00166667	rnorvegicus	DIV5.DIV1
GO:1901575	organic substance catabolic process	67	30	17.08	0.0002	0.00166667	rnorvegicus	DIV5.DIV1
GO:0006629	lipid metabolic process	64	29	16.31	0.0002	0.00166667	rnorvegicus	DIV5.DIV1
GO:0006082	organic acid metabolic process	53	25	13.51	0.00027	0.00207692	rnorvegicus	DIV5.DIV1
GO:0009062	fatty acid catabolic process	14	10	3.57	0.00034	0.00242857	rnorvegicus	DIV5.DIV1
GO:0019752	carboxylic acid metabolic process	51	24	13	0.00039	0.0026	rnorvegicus	DIV5.DIV1
GO:0043436	oxoacid metabolic process	52	24	13.25	0.00056	0.0035	rnorvegicus	DIV5.DIV1
GO:0072329	monocarboxylic acid catabolic process	15	10	3.82	0.00079	0.00464706	rnorvegicus	DIV5.DIV1
GO:0014065	phosphatidylinositol 3-kinase signaling	5	5	1.27	0.00102	0.0051	rnorvegicus	DIV5.DIV1
GO:0035335	peptidyl-tyrosine dephosphorylation	5	5	1.27	0.00102	0.0051	rnorvegicus	DIV5.DIV1
GO:0090630	activation of GTPase activity	5	5	1.27	0.00102	0.0051	rnorvegicus	DIV5.DIV1
GO:0022411	cellular component disassembly	18	11	4.59	0.00123	0.00585714	rnorvegicus	DIV5.DIV1
GO:0099171	presynaptic modulation of chemical synap...	7	6	1.78	0.0014	0.00611111	rnorvegicus	DIV5.DIV1
GO:0031667	response to nutrient levels	37	18	9.43	0.00142	0.00611111	rnorvegicus	DIV5.DIV1
GO:0009056	catabolic process	80	32	20.39	0.00147	0.00611111	rnorvegicus	DIV5.DIV1
GO:0044242	cellular lipid catabolic process	16	10	4.08	0.00165	0.00611111	rnorvegicus	DIV5.DIV1
GO:0016054	organic acid catabolic process	21	12	5.35	0.00165	0.00611111	rnorvegicus	DIV5.DIV1
GO:0046395	carboxylic acid catabolic process	21	12	5.35	0.00165	0.00611111	rnorvegicus	DIV5.DIV1
GO:0016311	dephosphorylation	24	13	6.12	0.00203	0.0072069	rnorvegicus	DIV5.DIV1
GO:0009991	response to extracellular stimulus	38	18	9.68	0.00209	0.0072069	rnorvegicus	DIV5.DIV1
GO:0062012	regulation of small molecule metabolic p...	17	10	4.33	0.00314	0.0104667	rnorvegicus	DIV5.DIV1
GO:0014066	regulation of phosphatidylinositol 3-kin...	4	4	1.02	0.00409	0.0123939	rnorvegicus	DIV5.DIV1
GO:0061077	chaperone-mediated protein folding	4	4	1.02	0.00409	0.0123939	rnorvegicus	DIV5.DIV1
GO:1900077	negative regulation of cellular response...	4	4	1.02	0.00409	0.0123939	rnorvegicus	DIV5.DIV1
GO:0044262	cellular carbohydrate metabolic process	15	9	3.82	0.0043	0.0126	rnorvegicus	DIV5.DIV1
GO:0043491	protein kinase B signaling	8	6	2.04	0.00441	0.0126	rnorvegicus	DIV5.DIV1
GO:0034612	response to tumor necrosis factor	6	5	1.53	0.00486	0.0135	rnorvegicus	DIV5.DIV1
GO:0033993	response to lipid	69	27	17.59	0.00545	0.0147297	rnorvegicus	DIV5.DIV1
GO:0007167	enzyme linked receptor protein signaling...	41	18	10.45	0.00596	0.0156842	rnorvegicus	DIV5.DIV1
GO:0016042	lipid catabolic process	21	11	5.35	0.0065	0.01636	rnorvegicus	DIV5.DIV1
GO:0044248	cellular catabolic process	67	26	17.08	0.00736	0.01636	rnorvegicus	DIV5.DIV1
GO:0018105	peptidyl-serine phosphorylation	19	10	4.84	0.00913	0.01636	rnorvegicus	DIV5.DIV1
GO:0018108	peptidyl-tyrosine phosphorylation	19	10	4.84	0.00913	0.01636	rnorvegicus	DIV5.DIV1
GO:0018212	peptidyl-tyrosine modification	19	10	4.84	0.00913	0.01636	rnorvegicus	DIV5.DIV1
GO:0007584	response to nutrient	22	11	5.61	0.01017	0.01636	rnorvegicus	DIV5.DIV1
GO:0007178	transmembrane receptor protein serine/th...	9	6	2.29	0.01046	0.01636	rnorvegicus	DIV5.DIV1
GO:0033273	response to vitamin	9	6	2.29	0.01046	0.01636	rnorvegicus	DIV5.DIV1
GO:1901361	organic cyclic compound catabolic proces...	14	8	3.57	0.01072	0.01636	rnorvegicus	DIV5.DIV1
GO:0016569	covalent chromatin modification	28	13	7.14	0.01129	0.01636	rnorvegicus	DIV5.DIV1
GO:0016570	histone modification	28	13	7.14	0.01129	0.01636	rnorvegicus	DIV5.DIV1
GO:0003006	developmental process involved in reprod...	31	14	7.9	0.0115	0.01636	rnorvegicus	DIV5.DIV1
GO:0030835	negative regulation of actin filament de...	7	5	1.78	0.0135	0.01636	rnorvegicus	DIV5.DIV1
GO:0032526	response to retinoic acid	7	5	1.78	0.0135	0.01636	rnorvegicus	DIV5.DIV1
GO:0046839	phospholipid dephosphorylation	7	5	1.78	0.0135	0.01636	rnorvegicus	DIV5.DIV1
GO:0046856	phosphatidylinositol dephosphorylation	7	5	1.78	0.0135	0.01636	rnorvegicus	DIV5.DIV1
GO:0051693	actin filament capping	7	5	1.78	0.0135	0.01636	rnorvegicus	DIV5.DIV1
GO:0051896	regulation of protein kinase B signaling	7	5	1.78	0.0135	0.01636	rnorvegicus	DIV5.DIV1
GO:0018209	peptidyl-serine modification	20	10	5.1	0.0143	0.01636	rnorvegicus	DIV5.DIV1
GO:0019439	aromatic compound catabolic process	12	7	3.06	0.0149	0.01636	rnorvegicus	DIV5.DIV1
GO:0044270	cellular nitrogen compound catabolic pro...	12	7	3.06	0.0149	0.01636	rnorvegicus	DIV5.DIV1
GO:0046700	heterocycle catabolic process	12	7	3.06	0.0149	0.01636	rnorvegicus	DIV5.DIV1
GO:0007276	gamete generation	23	11	5.86	0.01524	0.01636	rnorvegicus	DIV5.DIV1
GO:0000271	polysaccharide biosynthetic process	3	3	0.76	0.0163	0.01636	rnorvegicus	DIV5.DIV1
GO:0005978	glycogen biosynthetic process	3	3	0.76	0.0163	0.01636	rnorvegicus	DIV5.DIV1
GO:0006084	acetyl-CoA metabolic process	3	3	0.76	0.0163	0.01636	rnorvegicus	DIV5.DIV1
GO:0006111	regulation of gluconeogenesis	3	3	0.76	0.0163	0.01636	rnorvegicus	DIV5.DIV1
GO:0006730	one-carbon metabolic process	3	3	0.76	0.0163	0.01636	rnorvegicus	DIV5.DIV1
GO:0006986	response to unfolded protein	3	3	0.76	0.0163	0.01636	rnorvegicus	DIV5.DIV1
GO:0008299	isoprenoid biosynthetic process	3	3	0.76	0.0163	0.01636	rnorvegicus	DIV5.DIV1
GO:0009250	glucan biosynthetic process	3	3	0.76	0.0163	0.01636	rnorvegicus	DIV5.DIV1
GO:0010829	negative regulation of glucose transmemb...	3	3	0.76	0.0163	0.01636	rnorvegicus	DIV5.DIV1
GO:0014068	positive regulation of phosphatidylinosi...	3	3	0.76	0.0163	0.01636	rnorvegicus	DIV5.DIV1
GO:0032436	positive regulation of proteasomal ubiqu...	3	3	0.76	0.0163	0.01636	rnorvegicus	DIV5.DIV1
GO:0032515	negative regulation of phosphoprotein ph...	3	3	0.76	0.0163	0.01636	rnorvegicus	DIV5.DIV1
GO:0033353	S-adenosylmethionine cycle	3	3	0.76	0.0163	0.01636	rnorvegicus	DIV5.DIV1
GO:0033539	fatty acid beta-oxidation using acyl-CoA...	3	3	0.76	0.0163	0.01636	rnorvegicus	DIV5.DIV1
GO:0033692	cellular polysaccharide biosynthetic pro...	3	3	0.76	0.0163	0.01636	rnorvegicus	DIV5.DIV1
GO:0034620	cellular response to unfolded protein	3	3	0.76	0.0163	0.01636	rnorvegicus	DIV5.DIV1
GO:0035304	regulation of protein dephosphorylation	3	3	0.76	0.0163	0.01636	rnorvegicus	DIV5.DIV1
GO:0035308	negative regulation of protein dephospho...	3	3	0.76	0.0163	0.01636	rnorvegicus	DIV5.DIV1
GO:0035966	response to topologically incorrect prot...	3	3	0.76	0.0163	0.01636	rnorvegicus	DIV5.DIV1
GO:0035967	cellular response to topologically incor...	3	3	0.76	0.0163	0.01636	rnorvegicus	DIV5.DIV1
GO:0043666	regulation of phosphoprotein phosphatase...	3	3	0.76	0.0163	0.01636	rnorvegicus	DIV5.DIV1
GO:0043967	histone H4 acetylation	3	3	0.76	0.0163	0.01636	rnorvegicus	DIV5.DIV1
GO:0045103	intermediate filament-based process	3	3	0.76	0.0163	0.01636	rnorvegicus	DIV5.DIV1
GO:0045104	intermediate filament cytoskeleton organ...	3	3	0.76	0.0163	0.01636	rnorvegicus	DIV5.DIV1
GO:0045109	intermediate filament organization	3	3	0.76	0.0163	0.01636	rnorvegicus	DIV5.DIV1
GO:0046164	alcohol catabolic process	3	3	0.76	0.0163	0.01636	rnorvegicus	DIV5.DIV1
GO:0046174	polyol catabolic process	3	3	0.76	0.0163	0.01636	rnorvegicus	DIV5.DIV1
GO:0046459	short-chain fatty acid metabolic process	3	3	0.76	0.0163	0.01636	rnorvegicus	DIV5.DIV1
GO:0046500	S-adenosylmethionine metabolic process	3	3	0.76	0.0163	0.01636	rnorvegicus	DIV5.DIV1
GO:0046627	negative regulation of insulin receptor ...	3	3	0.76	0.0163	0.01636	rnorvegicus	DIV5.DIV1
GO:0046838	phosphorylated carbohydrate dephosphoryl...	3	3	0.76	0.0163	0.01636	rnorvegicus	DIV5.DIV1
GO:0046855	inositol phosphate dephosphorylation	3	3	0.76	0.0163	0.01636	rnorvegicus	DIV5.DIV1
GO:0048013	ephrin receptor signaling pathway	3	3	0.76	0.0163	0.01636	rnorvegicus	DIV5.DIV1
GO:0071545	inositol phosphate catabolic process	3	3	0.76	0.0163	0.01636	rnorvegicus	DIV5.DIV1
GO:1901800	positive regulation of proteasomal prote...	3	3	0.76	0.0163	0.01636	rnorvegicus	DIV5.DIV1
GO:1903052	positive regulation of proteolysis invol...	3	3	0.76	0.0163	0.01636	rnorvegicus	DIV5.DIV1
GO:2000060	positive regulation of ubiquitin-depende...	3	3	0.76	0.0163	0.01636	rnorvegicus	DIV5.DIV1
GO:0002244	hematopoietic progenitor cell differenti...	5	4	1.27	0.01636	0.01636	rnorvegicus	DIV5.DIV1
GO:0005976	polysaccharide metabolic process	5	4	1.27	0.01636	0.01636	rnorvegicus	DIV5.DIV1
GO:0035335	peptidyl-tyrosine dephosphorylation	9	9	2.52	9.6e-06	0.000433333	rnorvegicus	DIV14.DIV1
GO:0016311	dephosphorylation	54	30	15.1	1.1e-05	0.000433333	rnorvegicus	DIV14.DIV1
GO:0006470	protein dephosphorylation	35	22	9.79	1.3e-05	0.000433333	rnorvegicus	DIV14.DIV1
GO:0030258	lipid modification	41	24	11.47	2.8e-05	0.0007	rnorvegicus	DIV14.DIV1
GO:0043087	regulation of GTPase activity	50	26	13.98	0.00021	0.003	rnorvegicus	DIV14.DIV1
GO:0034620	cellular response to unfolded protein	9	8	2.52	0.00024	0.003	rnorvegicus	DIV14.DIV1
GO:0035967	cellular response to topologically incor...	9	8	2.52	0.00024	0.003	rnorvegicus	DIV14.DIV1
GO:0006986	response to unfolded protein	11	9	3.08	0.0003	0.003	rnorvegicus	DIV14.DIV1
GO:0035966	response to topologically incorrect prot...	11	9	3.08	0.0003	0.003	rnorvegicus	DIV14.DIV1
GO:0046856	phosphatidylinositol dephosphorylation	11	9	3.08	0.0003	0.003	rnorvegicus	DIV14.DIV1
GO:0044282	small molecule catabolic process	62	30	17.34	0.00035	0.00318182	rnorvegicus	DIV14.DIV1
GO:0016579	protein deubiquitination	6	6	1.68	0.00046	0.00328571	rnorvegicus	DIV14.DIV1
GO:0033539	fatty acid beta-oxidation using acyl-CoA...	6	6	1.68	0.00046	0.00328571	rnorvegicus	DIV14.DIV1
GO:0070646	protein modification by small protein re...	6	6	1.68	0.00046	0.00328571	rnorvegicus	DIV14.DIV1
GO:0043547	positive regulation of GTPase activity	42	22	11.75	0.00057	0.0038	rnorvegicus	DIV14.DIV1
GO:0042744	hydrogen peroxide catabolic process	8	7	2.24	0.00077	0.00413636	rnorvegicus	DIV14.DIV1
GO:0061077	chaperone-mediated protein folding	8	7	2.24	0.00077	0.00413636	rnorvegicus	DIV14.DIV1
GO:0046839	phospholipid dephosphorylation	14	10	3.92	0.00085	0.00413636	rnorvegicus	DIV14.DIV1
GO:0055114	oxidation-reduction process	99	42	27.68	0.00086	0.00413636	rnorvegicus	DIV14.DIV1
GO:0045454	cell redox homeostasis	10	8	2.8	0.0009	0.00413636	rnorvegicus	DIV14.DIV1
GO:0046164	alcohol catabolic process	10	8	2.8	0.0009	0.00413636	rnorvegicus	DIV14.DIV1
GO:1901616	organic hydroxy compound catabolic proce...	12	9	3.36	0.00091	0.00413636	rnorvegicus	DIV14.DIV1
GO:0065009	regulation of molecular function	274	97	76.62	0.00121	0.00526087	rnorvegicus	DIV14.DIV1
GO:0044281	small molecule metabolic process	184	69	51.45	0.00136	0.00566667	rnorvegicus	DIV14.DIV1
GO:0009161	ribonucleoside monophosphate metabolic p...	5	5	1.4	0.00167	0.00617857	rnorvegicus	DIV14.DIV1
GO:0042026	protein refolding	5	5	1.4	0.00167	0.00617857	rnorvegicus	DIV14.DIV1
GO:0051085	chaperone cofactor-dependent protein ref...	5	5	1.4	0.00167	0.00617857	rnorvegicus	DIV14.DIV1
GO:0006796	phosphate-containing compound metabolic ...	293	102	81.94	0.00173	0.00617857	rnorvegicus	DIV14.DIV1
GO:1901385	regulation of voltage-gated calcium chan...	13	9	3.64	0.00223	0.00697222	rnorvegicus	DIV14.DIV1
GO:0006793	phosphorus metabolic process	295	102	82.5	0.00229	0.00697222	rnorvegicus	DIV14.DIV1
GO:0009636	response to toxic substance	35	18	9.79	0.00242	0.00697222	rnorvegicus	DIV14.DIV1
GO:0019395	fatty acid oxidation	20	12	5.59	0.00248	0.00697222	rnorvegicus	DIV14.DIV1
GO:0034440	lipid oxidation	20	12	5.59	0.00248	0.00697222	rnorvegicus	DIV14.DIV1
GO:0043624	cellular protein complex disassembly	20	12	5.59	0.00248	0.00697222	rnorvegicus	DIV14.DIV1
GO:0051261	protein depolymerization	20	12	5.59	0.00248	0.00697222	rnorvegicus	DIV14.DIV1
GO:1901021	positive regulation of calcium ion trans...	11	8	3.08	0.00251	0.00697222	rnorvegicus	DIV14.DIV1
GO:0090630	activation of GTPase activity	9	7	2.52	0.00265	0.00716216	rnorvegicus	DIV14.DIV1
GO:0006650	glycerophospholipid metabolic process	38	19	10.63	0.0028	0.00736842	rnorvegicus	DIV14.DIV1
GO:1901019	regulation of calcium ion transmembrane ...	18	11	5.03	0.0031	0.00794872	rnorvegicus	DIV14.DIV1
GO:0044093	positive regulation of molecular functio...	186	68	52.01	0.00328	0.0082	rnorvegicus	DIV14.DIV1
GO:0032414	positive regulation of ion transmembrane...	16	10	4.47	0.00385	0.00916667	rnorvegicus	DIV14.DIV1
GO:0098869	cellular oxidant detoxification	16	10	4.47	0.00385	0.00916667	rnorvegicus	DIV14.DIV1
GO:1901575	organic substance catabolic process	184	67	51.45	0.00398	0.00925581	rnorvegicus	DIV14.DIV1
GO:0042221	response to chemical	427	139	119.41	0.00469	0.00932308	rnorvegicus	DIV14.DIV1
GO:0050790	regulation of catalytic activity	208	74	58.17	0.0049	0.00932308	rnorvegicus	DIV14.DIV1
GO:0016042	lipid catabolic process	37	18	10.35	0.00528	0.00932308	rnorvegicus	DIV14.DIV1
GO:0044255	cellular lipid metabolic process	104	41	29.08	0.00533	0.00932308	rnorvegicus	DIV14.DIV1
GO:0006457	protein folding	19	11	5.31	0.00555	0.00932308	rnorvegicus	DIV14.DIV1
GO:0071222	cellular response to lipopolysaccharide	19	11	5.31	0.00555	0.00932308	rnorvegicus	DIV14.DIV1
GO:0098754	detoxification	19	11	5.31	0.00555	0.00932308	rnorvegicus	DIV14.DIV1
GO:1901564	organonitrogen compound metabolic proces...	471	151	131.71	0.00589	0.00932308	rnorvegicus	DIV14.DIV1
GO:0006144	purine nucleobase metabolic process	4	4	1.12	0.00603	0.00932308	rnorvegicus	DIV14.DIV1
GO:0009126	purine nucleoside monophosphate metaboli...	4	4	1.12	0.00603	0.00932308	rnorvegicus	DIV14.DIV1
GO:0009164	nucleoside catabolic process	4	4	1.12	0.00603	0.00932308	rnorvegicus	DIV14.DIV1
GO:0009167	purine ribonucleoside monophosphate meta...	4	4	1.12	0.00603	0.00932308	rnorvegicus	DIV14.DIV1
GO:0015696	ammonium transport	4	4	1.12	0.00603	0.00932308	rnorvegicus	DIV14.DIV1
GO:0034381	plasma lipoprotein particle clearance	4	4	1.12	0.00603	0.00932308	rnorvegicus	DIV14.DIV1
GO:0034656	nucleobase-containing small molecule cat...	4	4	1.12	0.00603	0.00932308	rnorvegicus	DIV14.DIV1
GO:0035970	peptidyl-threonine dephosphorylation	4	4	1.12	0.00603	0.00932308	rnorvegicus	DIV14.DIV1
GO:0036135	Schwann cell migration	4	4	1.12	0.00603	0.00932308	rnorvegicus	DIV14.DIV1
GO:0072488	ammonium transmembrane transport	4	4	1.12	0.00603	0.00932308	rnorvegicus	DIV14.DIV1
GO:1900147	regulation of Schwann cell migration	4	4	1.12	0.00603	0.00932308	rnorvegicus	DIV14.DIV1
GO:1901658	glycosyl compound catabolic process	4	4	1.12	0.00603	0.00932308	rnorvegicus	DIV14.DIV1
GO:0009056	catabolic process	216	76	60.4	0.00606	0.00932308	rnorvegicus	DIV14.DIV1
GO:0044242	cellular lipid catabolic process	32	16	8.95	0.00606	0.00932308	rnorvegicus	DIV14.DIV1
GO:0002027	regulation of heart rate	10	7	2.8	0.00672	0.00943373	rnorvegicus	DIV14.DIV1
GO:0008347	glial cell migration	10	7	2.8	0.00672	0.00943373	rnorvegicus	DIV14.DIV1
GO:0009112	nucleobase metabolic process	10	7	2.8	0.00672	0.00943373	rnorvegicus	DIV14.DIV1
GO:0016572	histone phosphorylation	10	7	2.8	0.00672	0.00943373	rnorvegicus	DIV14.DIV1
GO:2001259	positive regulation of cation channel ac...	10	7	2.8	0.00672	0.00943373	rnorvegicus	DIV14.DIV1
GO:0030835	negative regulation of actin filament de...	8	6	2.24	0.00756	0.00943373	rnorvegicus	DIV14.DIV1
GO:0046174	polyol catabolic process	8	6	2.24	0.00756	0.00943373	rnorvegicus	DIV14.DIV1
GO:0046838	phosphorylated carbohydrate dephosphoryl...	8	6	2.24	0.00756	0.00943373	rnorvegicus	DIV14.DIV1
GO:0046855	inositol phosphate dephosphorylation	8	6	2.24	0.00756	0.00943373	rnorvegicus	DIV14.DIV1
GO:0051693	actin filament capping	8	6	2.24	0.00756	0.00943373	rnorvegicus	DIV14.DIV1
GO:0071545	inositol phosphate catabolic process	8	6	2.24	0.00756	0.00943373	rnorvegicus	DIV14.DIV1
GO:0009123	nucleoside monophosphate metabolic proce...	6	5	1.68	0.00772	0.00943373	rnorvegicus	DIV14.DIV1
GO:0031663	lipopolysaccharide-mediated signaling pa...	6	5	1.68	0.00772	0.00943373	rnorvegicus	DIV14.DIV1
GO:0042246	tissue regeneration	6	5	1.68	0.00772	0.00943373	rnorvegicus	DIV14.DIV1
GO:0048747	muscle fiber development	6	5	1.68	0.00772	0.00943373	rnorvegicus	DIV14.DIV1
GO:1901387	positive regulation of voltage-gated cal...	6	5	1.68	0.00772	0.00943373	rnorvegicus	DIV14.DIV1
GO:0006464	cellular protein modification process	281	95	78.58	0.00783	0.00943373	rnorvegicus	DIV14.DIV1
GO:0036211	protein modification process	281	95	78.58	0.00783	0.00943373	rnorvegicus	DIV14.DIV1
GO:0070647	protein modification by small protein co...	44	20	12.3	0.00866	0.0103095	rnorvegicus	DIV14.DIV1
GO:0048562	embryonic organ morphogenesis	15	9	4.19	0.00894	0.0105176	rnorvegicus	DIV14.DIV1
GO:0071219	cellular response to molecule of bacteri...	20	11	5.59	0.0093	0.010814	rnorvegicus	DIV14.DIV1
GO:0014015	positive regulation of gliogenesis	13	8	3.64	0.01127	0.012337	rnorvegicus	DIV14.DIV1
GO:0043242	negative regulation of protein-containin...	13	8	3.64	0.01127	0.012337	rnorvegicus	DIV14.DIV1
GO:0055088	lipid homeostasis	13	8	3.64	0.01127	0.012337	rnorvegicus	DIV14.DIV1
GO:1901880	negative regulation of protein depolymer...	13	8	3.64	0.01127	0.012337	rnorvegicus	DIV14.DIV1
GO:1904427	positive regulation of calcium ion trans...	13	8	3.64	0.01127	0.012337	rnorvegicus	DIV14.DIV1
GO:1903169	regulation of calcium ion transmembrane ...	23	12	6.43	0.01135	0.012337	rnorvegicus	DIV14.DIV1
GO:0007030	Golgi organization	18	10	5.03	0.012	0.0125	rnorvegicus	DIV14.DIV1
GO:0032411	positive regulation of transporter activ...	18	10	5.03	0.012	0.0125	rnorvegicus	DIV14.DIV1
GO:0097237	cellular response to toxic substance	18	10	5.03	0.012	0.0125	rnorvegicus	DIV14.DIV1
GO:1990748	cellular detoxification	18	10	5.03	0.012	0.0125	rnorvegicus	DIV14.DIV1
GO:0051345	positive regulation of hydrolase activit...	87	34	24.33	0.01294	0.0133402	rnorvegicus	DIV14.DIV1
GO:0048534	hematopoietic or lymphoid organ developm...	63	26	17.62	0.01335	0.01343	rnorvegicus	DIV14.DIV1
GO:0002520	immune system development	66	27	18.46	0.01343	0.01343	rnorvegicus	DIV14.DIV1
GO:0080135	regulation of cellular response to stres...	66	27	18.46	0.01343	0.01343	rnorvegicus	DIV14.DIV1
GO:0045103	intermediate filament-based process	9	9	4.18	0.00092	0.0457	hsapiens	NPC.iPS
GO:0045104	intermediate filament cytoskeleton organ...	9	9	4.18	0.00092	0.0457	hsapiens	NPC.iPS
GO:1903313	positive regulation of mRNA metabolic pr...	8	8	3.71	0.00201	0.0457	hsapiens	NPC.iPS
GO:0030154	cell differentiation	162	90	75.16	0.00316	0.0457	hsapiens	NPC.iPS
GO:0001505	regulation of neurotransmitter levels	18	14	8.35	0.00609	0.0457	hsapiens	NPC.iPS
GO:0048869	cellular developmental process	168	91	77.94	0.00894	0.0457	hsapiens	NPC.iPS
GO:0009913	epidermal cell differentiation	6	6	2.78	0.00964	0.0457	hsapiens	NPC.iPS
GO:0045596	negative regulation of cell differentiat...	22	16	10.21	0.00996	0.0457	hsapiens	NPC.iPS
GO:0051093	negative regulation of developmental pro...	29	20	13.45	0.01001	0.0457	hsapiens	NPC.iPS
GO:0007160	cell-matrix adhesion	17	13	7.89	0.01063	0.0457	hsapiens	NPC.iPS
GO:0051241	negative regulation of multicellular org...	35	23	16.24	0.01382	0.0457	hsapiens	NPC.iPS
GO:0050770	regulation of axonogenesis	14	11	6.5	0.01389	0.0457	hsapiens	NPC.iPS
GO:0030855	epithelial cell differentiation	30	20	13.92	0.01742	0.0457	hsapiens	NPC.iPS
GO:0010721	negative regulation of cell development	11	9	5.1	0.01768	0.0457	hsapiens	NPC.iPS
GO:0044255	cellular lipid metabolic process	43	27	19.95	0.01815	0.0457	hsapiens	NPC.iPS
GO:0006458	'de novo' protein folding	5	5	2.32	0.02101	0.0457	hsapiens	NPC.iPS
GO:0008089	anterograde axonal transport	5	5	2.32	0.02101	0.0457	hsapiens	NPC.iPS
GO:0009123	nucleoside monophosphate metabolic proce...	5	5	2.32	0.02101	0.0457	hsapiens	NPC.iPS
GO:0009161	ribonucleoside monophosphate metabolic p...	5	5	2.32	0.02101	0.0457	hsapiens	NPC.iPS
GO:0010971	positive regulation of G2/M transition o...	5	5	2.32	0.02101	0.0457	hsapiens	NPC.iPS
GO:0015698	inorganic anion transport	5	5	2.32	0.02101	0.0457	hsapiens	NPC.iPS
GO:0015740	C4-dicarboxylate transport	5	5	2.32	0.02101	0.0457	hsapiens	NPC.iPS
GO:0030216	keratinocyte differentiation	5	5	2.32	0.02101	0.0457	hsapiens	NPC.iPS
GO:0042026	protein refolding	5	5	2.32	0.02101	0.0457	hsapiens	NPC.iPS
GO:0042157	lipoprotein metabolic process	5	5	2.32	0.02101	0.0457	hsapiens	NPC.iPS
GO:0048489	synaptic vesicle transport	5	5	2.32	0.02101	0.0457	hsapiens	NPC.iPS
GO:0051084	'de novo' posttranslational protein fold...	5	5	2.32	0.02101	0.0457	hsapiens	NPC.iPS
GO:0051085	chaperone cofactor-dependent protein ref...	5	5	2.32	0.02101	0.0457	hsapiens	NPC.iPS
GO:0070507	regulation of microtubule cytoskeleton o...	5	5	2.32	0.02101	0.0457	hsapiens	NPC.iPS
GO:0097479	synaptic vesicle localization	5	5	2.32	0.02101	0.0457	hsapiens	NPC.iPS
GO:0098661	inorganic anion transmembrane transport	5	5	2.32	0.02101	0.0457	hsapiens	NPC.iPS
GO:1902751	positive regulation of cell cycle G2/M p...	5	5	2.32	0.02101	0.0457	hsapiens	NPC.iPS
GO:0006835	dicarboxylic acid transport	8	7	3.71	0.02119	0.0457	hsapiens	NPC.iPS
GO:0009152	purine ribonucleotide biosynthetic proce...	8	7	3.71	0.02119	0.0457	hsapiens	NPC.iPS
GO:0031345	negative regulation of cell projection o...	8	7	3.71	0.02119	0.0457	hsapiens	NPC.iPS
GO:0032886	regulation of microtubule-based process	8	7	3.71	0.02119	0.0457	hsapiens	NPC.iPS
GO:0045665	negative regulation of neuron differenti...	8	7	3.71	0.02119	0.0457	hsapiens	NPC.iPS
GO:0006820	anion transport	25	17	11.6	0.02167	0.0457	hsapiens	NPC.iPS
GO:0023061	signal release	27	18	12.53	0.02411	0.0457	hsapiens	NPC.iPS
GO:0051656	establishment of organelle localization	27	18	12.53	0.02411	0.0457	hsapiens	NPC.iPS
GO:0009890	negative regulation of biosynthetic proc...	50	30	23.2	0.03001	0.0457	hsapiens	NPC.iPS
GO:0006836	neurotransmitter transport	15	11	6.96	0.03075	0.0457	hsapiens	NPC.iPS
GO:0051648	vesicle localization	15	11	6.96	0.03075	0.0457	hsapiens	NPC.iPS
GO:0051650	establishment of vesicle localization	15	11	6.96	0.03075	0.0457	hsapiens	NPC.iPS
GO:0035601	protein deacylation	10	8	4.64	0.03224	0.0457	hsapiens	NPC.iPS
GO:0043588	skin development	10	8	4.64	0.03224	0.0457	hsapiens	NPC.iPS
GO:0051961	negative regulation of nervous system de...	10	8	4.64	0.03224	0.0457	hsapiens	NPC.iPS
GO:0061387	regulation of extent of cell growth	10	8	4.64	0.03224	0.0457	hsapiens	NPC.iPS
GO:0098732	macromolecule deacylation	10	8	4.64	0.03224	0.0457	hsapiens	NPC.iPS
GO:0051960	regulation of nervous system development	35	22	16.24	0.0323	0.0457	hsapiens	NPC.iPS
GO:0022008	neurogenesis	80	45	37.12	0.03588	0.0457	hsapiens	NPC.iPS
GO:0010558	negative regulation of macromolecule bio...	47	28	21.81	0.04034	0.0457	hsapiens	NPC.iPS
GO:0006690	icosanoid metabolic process	7	6	3.25	0.041	0.0457	hsapiens	NPC.iPS
GO:0006890	retrograde vesicle-mediated transport, G...	7	6	3.25	0.041	0.0457	hsapiens	NPC.iPS
GO:0007229	integrin-mediated signaling pathway	7	6	3.25	0.041	0.0457	hsapiens	NPC.iPS
GO:0010977	negative regulation of neuron projection...	7	6	3.25	0.041	0.0457	hsapiens	NPC.iPS
GO:0015800	acidic amino acid transport	7	6	3.25	0.041	0.0457	hsapiens	NPC.iPS
GO:0030038	contractile actin filament bundle assemb...	7	6	3.25	0.041	0.0457	hsapiens	NPC.iPS
GO:0043149	stress fiber assembly	7	6	3.25	0.041	0.0457	hsapiens	NPC.iPS
GO:0046486	glycerolipid metabolic process	7	6	3.25	0.041	0.0457	hsapiens	NPC.iPS
GO:0061077	chaperone-mediated protein folding	7	6	3.25	0.041	0.0457	hsapiens	NPC.iPS
GO:0098930	axonal transport	7	6	3.25	0.041	0.0457	hsapiens	NPC.iPS
GO:0001667	ameboidal-type cell migration	19	13	8.81	0.04173	0.0457	hsapiens	NPC.iPS
GO:0006909	phagocytosis	19	13	8.81	0.04173	0.0457	hsapiens	NPC.iPS
GO:0006986	response to unfolded protein	12	9	5.57	0.04213	0.0457	hsapiens	NPC.iPS
GO:0007269	neurotransmitter secretion	12	9	5.57	0.04213	0.0457	hsapiens	NPC.iPS
GO:0009260	ribonucleotide biosynthetic process	12	9	5.57	0.04213	0.0457	hsapiens	NPC.iPS
GO:0035966	response to topologically incorrect prot...	12	9	5.57	0.04213	0.0457	hsapiens	NPC.iPS
GO:0046390	ribose phosphate biosynthetic process	12	9	5.57	0.04213	0.0457	hsapiens	NPC.iPS
GO:0097191	extrinsic apoptotic signaling pathway	12	9	5.57	0.04213	0.0457	hsapiens	NPC.iPS
GO:0099643	signal release from synapse	12	9	5.57	0.04213	0.0457	hsapiens	NPC.iPS
GO:1901568	fatty acid derivative metabolic process	12	9	5.57	0.04213	0.0457	hsapiens	NPC.iPS
GO:0001889	liver development	4	4	1.86	0.0457	0.0457	hsapiens	NPC.iPS
GO:0006265	DNA topological change	4	4	1.86	0.0457	0.0457	hsapiens	NPC.iPS
GO:0006862	nucleotide transport	4	4	1.86	0.0457	0.0457	hsapiens	NPC.iPS
GO:0006921	cellular component disassembly involved ...	4	4	1.86	0.0457	0.0457	hsapiens	NPC.iPS
GO:0008654	phospholipid biosynthetic process	4	4	1.86	0.0457	0.0457	hsapiens	NPC.iPS
GO:0009133	nucleoside diphosphate biosynthetic proc...	4	4	1.86	0.0457	0.0457	hsapiens	NPC.iPS
GO:0009188	ribonucleoside diphosphate biosynthetic ...	4	4	1.86	0.0457	0.0457	hsapiens	NPC.iPS
GO:0009409	response to cold	4	4	1.86	0.0457	0.0457	hsapiens	NPC.iPS
GO:0009448	gamma-aminobutyric acid metabolic proces...	4	4	1.86	0.0457	0.0457	hsapiens	NPC.iPS
GO:0015748	organophosphate ester transport	4	4	1.86	0.0457	0.0457	hsapiens	NPC.iPS
GO:0015850	organic hydroxy compound transport	4	4	1.86	0.0457	0.0457	hsapiens	NPC.iPS
GO:0015865	purine nucleotide transport	4	4	1.86	0.0457	0.0457	hsapiens	NPC.iPS
GO:0015867	ATP transport	4	4	1.86	0.0457	0.0457	hsapiens	NPC.iPS
GO:0015868	purine ribonucleotide transport	4	4	1.86	0.0457	0.0457	hsapiens	NPC.iPS
GO:0030262	apoptotic nuclear changes	4	4	1.86	0.0457	0.0457	hsapiens	NPC.iPS
GO:0031100	animal organ regeneration	4	4	1.86	0.0457	0.0457	hsapiens	NPC.iPS
GO:0031110	regulation of microtubule polymerization...	4	4	1.86	0.0457	0.0457	hsapiens	NPC.iPS
GO:0031113	regulation of microtubule polymerization	4	4	1.86	0.0457	0.0457	hsapiens	NPC.iPS
GO:0032355	response to estradiol	4	4	1.86	0.0457	0.0457	hsapiens	NPC.iPS
GO:0032612	interleukin-1 production	4	4	1.86	0.0457	0.0457	hsapiens	NPC.iPS
GO:0033539	fatty acid beta-oxidation using acyl-CoA...	4	4	1.86	0.0457	0.0457	hsapiens	NPC.iPS
GO:0043277	apoptotic cell clearance	4	4	1.86	0.0457	0.0457	hsapiens	NPC.iPS
GO:0045109	intermediate filament organization	4	4	1.86	0.0457	0.0457	hsapiens	NPC.iPS
GO:0045948	positive regulation of translational ini...	4	4	1.86	0.0457	0.0457	hsapiens	NPC.iPS
GO:0046940	nucleoside monophosphate phosphorylation	4	4	1.86	0.0457	0.0457	hsapiens	NPC.iPS
GO:0048026	positive regulation of mRNA splicing, vi...	4	4	1.86	0.0457	0.0457	hsapiens	NPC.iPS
GO:0050685	positive regulation of mRNA processing	4	4	1.86	0.0457	0.0457	hsapiens	NPC.iPS
GO:0050779	RNA destabilization	4	4	1.86	0.0457	0.0457	hsapiens	NPC.iPS
GO:0006397	mRNA processing	53	41	27.91	0.00011	0.007	hsapiens	Neu.iPS
GO:0008380	RNA splicing	53	40	27.91	0.00034	0.007	hsapiens	Neu.iPS
GO:0043484	regulation of RNA splicing	33	27	17.38	0.00036	0.007	hsapiens	Neu.iPS
GO:0000375	RNA splicing, via transesterification re...	47	36	24.75	0.00042	0.007	hsapiens	Neu.iPS
GO:0000377	RNA splicing, via transesterification re...	47	36	24.75	0.00042	0.007	hsapiens	Neu.iPS
GO:0000398	mRNA splicing, via spliceosome	47	36	24.75	0.00042	0.007	hsapiens	Neu.iPS
GO:0048024	regulation of mRNA splicing, via spliceo...	26	22	13.69	0.00055	0.00785714	hsapiens	Neu.iPS
GO:0016197	endosomal transport	22	19	11.59	0.00084	0.0105	hsapiens	Neu.iPS
GO:0050684	regulation of mRNA processing	27	22	14.22	0.00154	0.0154	hsapiens	Neu.iPS
GO:1903312	negative regulation of mRNA metabolic pr...	10	10	5.27	0.00154	0.0154	hsapiens	Neu.iPS
GO:0009890	negative regulation of biosynthetic proc...	58	41	30.54	0.00273	0.0241667	hsapiens	Neu.iPS
GO:0051252	regulation of RNA metabolic process	146	92	76.89	0.0029	0.0241667	hsapiens	Neu.iPS
GO:0031327	negative regulation of cellular biosynth...	55	39	28.96	0.0032	0.0246154	hsapiens	Neu.iPS
GO:0009636	response to toxic substance	19	16	10.01	0.00395	0.0282143	hsapiens	Neu.iPS
GO:0051253	negative regulation of RNA metabolic pro...	51	36	26.86	0.0053	0.0342222	hsapiens	Neu.iPS
GO:1902373	negative regulation of mRNA catabolic pr...	8	8	4.21	0.00569	0.0342222	hsapiens	Neu.iPS
GO:0010558	negative regulation of macromolecule bio...	53	37	27.91	0.00633	0.0342222	hsapiens	Neu.iPS
GO:0007517	muscle organ development	18	15	9.48	0.0065	0.0342222	hsapiens	Neu.iPS
GO:2000113	negative regulation of cellular macromol...	50	35	26.33	0.00743	0.0342222	hsapiens	Neu.iPS
GO:0010628	positive regulation of gene expression	98	63	51.61	0.00815	0.0342222	hsapiens	Neu.iPS
GO:0031032	actomyosin structure organization	26	20	13.69	0.00873	0.0342222	hsapiens	Neu.iPS
GO:0001889	liver development	11	10	5.79	0.00895	0.0342222	hsapiens	Neu.iPS
GO:0061008	hepaticobiliary system development	11	10	5.79	0.00895	0.0342222	hsapiens	Neu.iPS
GO:0097237	cellular response to toxic substance	11	10	5.79	0.00895	0.0342222	hsapiens	Neu.iPS
GO:0098754	detoxification	11	10	5.79	0.00895	0.0342222	hsapiens	Neu.iPS
GO:1990748	cellular detoxification	11	10	5.79	0.00895	0.0342222	hsapiens	Neu.iPS
GO:0019219	regulation of nucleobase-containing comp...	157	96	82.68	0.00924	0.0342222	hsapiens	Neu.iPS
GO:0017148	negative regulation of translation	14	12	7.37	0.01033	0.0342812	hsapiens	Neu.iPS
GO:0034249	negative regulation of cellular amide me...	14	12	7.37	0.01033	0.0342812	hsapiens	Neu.iPS
GO:0016569	covalent chromatin modification	17	14	8.95	0.0106	0.0342812	hsapiens	Neu.iPS
GO:0048255	mRNA stabilization	7	7	3.69	0.01091	0.0342812	hsapiens	Neu.iPS
GO:0006396	RNA processing	78	51	41.08	0.01097	0.0342812	hsapiens	Neu.iPS
GO:0045934	negative regulation of nucleobase-contai...	53	36	27.91	0.01401	0.0396829	hsapiens	Neu.iPS
GO:0000280	nuclear division	22	17	11.59	0.01471	0.0396829	hsapiens	Neu.iPS
GO:0009123	nucleoside monophosphate metabolic proce...	10	9	5.27	0.01577	0.0396829	hsapiens	Neu.iPS
GO:0045103	intermediate filament-based process	10	9	5.27	0.01577	0.0396829	hsapiens	Neu.iPS
GO:0045104	intermediate filament cytoskeleton organ...	10	9	5.27	0.01577	0.0396829	hsapiens	Neu.iPS
GO:0051259	protein complex oligomerization	10	9	5.27	0.01577	0.0396829	hsapiens	Neu.iPS
GO:0051260	protein homooligomerization	10	9	5.27	0.01577	0.0396829	hsapiens	Neu.iPS
GO:0048545	response to steroid hormone	19	15	10.01	0.01608	0.0396829	hsapiens	Neu.iPS
GO:0061061	muscle structure development	35	25	18.43	0.01627	0.0396829	hsapiens	Neu.iPS
GO:0000380	alternative mRNA splicing, via spliceoso...	16	13	8.43	0.01708	0.0397209	hsapiens	Neu.iPS
GO:0000381	regulation of alternative mRNA splicing,...	16	13	8.43	0.01708	0.0397209	hsapiens	Neu.iPS
GO:0019058	viral life cycle	32	23	16.85	0.01893	0.0407755	hsapiens	Neu.iPS
GO:0015740	C4-dicarboxylate transport	6	6	3.16	0.0209	0.0407755	hsapiens	Neu.iPS
GO:0031100	animal organ regeneration	6	6	3.16	0.0209	0.0407755	hsapiens	Neu.iPS
GO:0032456	endocytic recycling	6	6	3.16	0.0209	0.0407755	hsapiens	Neu.iPS
GO:0039694	viral RNA genome replication	6	6	3.16	0.0209	0.0407755	hsapiens	Neu.iPS
GO:0002790	peptide secretion	21	16	11.06	0.02237	0.0407755	hsapiens	Neu.iPS
GO:0006909	phagocytosis	21	16	11.06	0.02237	0.0407755	hsapiens	Neu.iPS
GO:0019079	viral genome replication	15	12	7.9	0.02719	0.0407755	hsapiens	Neu.iPS
GO:0006644	phospholipid metabolic process	9	8	4.74	0.02751	0.0407755	hsapiens	Neu.iPS
GO:0006650	glycerophospholipid metabolic process	9	8	4.74	0.02751	0.0407755	hsapiens	Neu.iPS
GO:0009161	ribonucleoside monophosphate metabolic p...	9	8	4.74	0.02751	0.0407755	hsapiens	Neu.iPS
GO:0098869	cellular oxidant detoxification	9	8	4.74	0.02751	0.0407755	hsapiens	Neu.iPS
GO:1902369	negative regulation of RNA catabolic pro...	9	8	4.74	0.02751	0.0407755	hsapiens	Neu.iPS
GO:0046486	glycerolipid metabolic process	12	10	6.32	0.02851	0.0407755	hsapiens	Neu.iPS
GO:0044089	positive regulation of cellular componen...	33	23	17.38	0.03221	0.0407755	hsapiens	Neu.iPS
GO:0031326	regulation of cellular biosynthetic proc...	153	91	80.58	0.03301	0.0407755	hsapiens	Neu.iPS
GO:0030029	actin filament-based process	76	48	40.02	0.03332	0.0407755	hsapiens	Neu.iPS
GO:0007423	sensory organ development	20	15	10.53	0.03359	0.0407755	hsapiens	Neu.iPS
GO:0009306	protein secretion	20	15	10.53	0.03359	0.0407755	hsapiens	Neu.iPS
GO:0035592	establishment of protein localization to...	20	15	10.53	0.03359	0.0407755	hsapiens	Neu.iPS
GO:0071692	protein localization to extracellular re...	20	15	10.53	0.03359	0.0407755	hsapiens	Neu.iPS
GO:0009889	regulation of biosynthetic process	157	93	82.68	0.03576	0.0407755	hsapiens	Neu.iPS
GO:0051254	positive regulation of RNA metabolic pro...	64	41	33.7	0.03599	0.0407755	hsapiens	Neu.iPS
GO:0030036	actin cytoskeleton organization	71	45	37.39	0.03618	0.0407755	hsapiens	Neu.iPS
GO:0051648	vesicle localization	25	18	13.17	0.03674	0.0407755	hsapiens	Neu.iPS
GO:0051650	establishment of vesicle localization	25	18	13.17	0.03674	0.0407755	hsapiens	Neu.iPS
GO:0030048	actin filament-based movement	17	13	8.95	0.03815	0.0407755	hsapiens	Neu.iPS
GO:0140014	mitotic nuclear division	17	13	8.95	0.03815	0.0407755	hsapiens	Neu.iPS
GO:0006862	nucleotide transport	5	5	2.63	0.03996	0.0407755	hsapiens	Neu.iPS
GO:0007040	lysosome organization	5	5	2.63	0.03996	0.0407755	hsapiens	Neu.iPS
GO:0009124	nucleoside monophosphate biosynthetic pr...	5	5	2.63	0.03996	0.0407755	hsapiens	Neu.iPS
GO:0009133	nucleoside diphosphate biosynthetic proc...	5	5	2.63	0.03996	0.0407755	hsapiens	Neu.iPS
GO:0009188	ribonucleoside diphosphate biosynthetic ...	5	5	2.63	0.03996	0.0407755	hsapiens	Neu.iPS
GO:0015748	organophosphate ester transport	5	5	2.63	0.03996	0.0407755	hsapiens	Neu.iPS
GO:0015865	purine nucleotide transport	5	5	2.63	0.03996	0.0407755	hsapiens	Neu.iPS
GO:0015867	ATP transport	5	5	2.63	0.03996	0.0407755	hsapiens	Neu.iPS
GO:0015868	purine ribonucleotide transport	5	5	2.63	0.03996	0.0407755	hsapiens	Neu.iPS
GO:0019068	virion assembly	5	5	2.63	0.03996	0.0407755	hsapiens	Neu.iPS
GO:0030261	chromosome condensation	5	5	2.63	0.03996	0.0407755	hsapiens	Neu.iPS
GO:0030534	adult behavior	5	5	2.63	0.03996	0.0407755	hsapiens	Neu.iPS
GO:0032233	positive regulation of actin filament bu...	5	5	2.63	0.03996	0.0407755	hsapiens	Neu.iPS
GO:0045109	intermediate filament organization	5	5	2.63	0.03996	0.0407755	hsapiens	Neu.iPS
GO:0045132	meiotic chromosome segregation	5	5	2.63	0.03996	0.0407755	hsapiens	Neu.iPS
GO:0046033	AMP metabolic process	5	5	2.63	0.03996	0.0407755	hsapiens	Neu.iPS
GO:0046940	nucleoside monophosphate phosphorylation	5	5	2.63	0.03996	0.0407755	hsapiens	Neu.iPS
GO:0050905	neuromuscular process	5	5	2.63	0.03996	0.0407755	hsapiens	Neu.iPS
GO:0051262	protein tetramerization	5	5	2.63	0.03996	0.0407755	hsapiens	Neu.iPS
GO:0051289	protein homotetramerization	5	5	2.63	0.03996	0.0407755	hsapiens	Neu.iPS
GO:0051503	adenine nucleotide transport	5	5	2.63	0.03996	0.0407755	hsapiens	Neu.iPS
GO:0062237	protein localization to postsynapse	5	5	2.63	0.03996	0.0407755	hsapiens	Neu.iPS
GO:0080171	lytic vacuole organization	5	5	2.63	0.03996	0.0407755	hsapiens	Neu.iPS
GO:0097549	chromatin organization involved in negat...	5	5	2.63	0.03996	0.0407755	hsapiens	Neu.iPS
GO:1901264	carbohydrate derivative transport	5	5	2.63	0.03996	0.0407755	hsapiens	Neu.iPS
GO:1901685	glutathione derivative metabolic process	5	5	2.63	0.03996	0.0407755	hsapiens	Neu.iPS
GO:1901687	glutathione derivative biosynthetic proc...	5	5	2.63	0.03996	0.0407755	hsapiens	Neu.iPS
GO:0010556	regulation of macromolecule biosynthetic...	143	85	75.31	0.04061	0.0410202	hsapiens	Neu.iPS
GO:0016570	histone modification	14	11	7.37	0.04269	0.04269	hsapiens	Neu.iPS
GO:0055114	oxidation-reduction process	68	49	34.35	0.00011	0.011	hsapiens	Neu.NPC
GO:0006650	glycerophospholipid metabolic process	10	10	5.05	0.001	0.05	hsapiens	Neu.NPC
GO:0030838	positive regulation of actin filament po...	9	9	4.55	0.00201	0.0505	hsapiens	Neu.NPC
GO:0046486	glycerolipid metabolic process	12	11	6.06	0.00326	0.0505	hsapiens	Neu.NPC
GO:0006417	regulation of translation	32	24	16.16	0.00334	0.0505	hsapiens	Neu.NPC
GO:0044242	cellular lipid catabolic process	15	13	7.58	0.00376	0.0505	hsapiens	Neu.NPC
GO:0006446	regulation of translational initiation	8	8	4.04	0.00404	0.0505	hsapiens	Neu.NPC
GO:0045010	actin nucleation	8	8	4.04	0.00404	0.0505	hsapiens	Neu.NPC
GO:0010927	cellular component assembly involved in ...	11	10	5.56	0.00604	0.0623077	hsapiens	Neu.NPC
GO:0045454	cell redox homeostasis	14	12	7.07	0.00664	0.0623077	hsapiens	Neu.NPC
GO:0009060	aerobic respiration	7	7	3.54	0.0081	0.0623077	hsapiens	Neu.NPC
GO:0099188	postsynaptic cytoskeleton organization	7	7	3.54	0.0081	0.0623077	hsapiens	Neu.NPC
GO:1903312	negative regulation of mRNA metabolic pr...	7	7	3.54	0.0081	0.0623077	hsapiens	Neu.NPC
GO:0031032	actomyosin structure organization	27	20	13.64	0.00956	0.0664444	hsapiens	Neu.NPC
GO:0051260	protein homooligomerization	10	9	5.05	0.01112	0.0664444	hsapiens	Neu.NPC
GO:0061640	cytoskeleton-dependent cytokinesis	10	9	5.05	0.01112	0.0664444	hsapiens	Neu.NPC
GO:0006644	phospholipid metabolic process	13	11	6.57	0.01159	0.0664444	hsapiens	Neu.NPC
GO:0034248	regulation of cellular amide metabolic p...	34	24	17.17	0.01196	0.0664444	hsapiens	Neu.NPC
GO:0016042	lipid catabolic process	21	16	10.61	0.01356	0.0711868	hsapiens	Neu.NPC
GO:0034314	Arp2/3 complex-mediated actin nucleation	6	6	3.03	0.01619	0.0711868	hsapiens	Neu.NPC
GO:0098974	postsynaptic actin cytoskeleton organiza...	6	6	3.03	0.01619	0.0711868	hsapiens	Neu.NPC
GO:0043043	peptide biosynthetic process	45	30	22.73	0.01726	0.0711868	hsapiens	Neu.NPC
GO:0006909	phagocytosis	23	17	11.62	0.01768	0.0711868	hsapiens	Neu.NPC
GO:0034976	response to endoplasmic reticulum stress	23	17	11.62	0.01768	0.0711868	hsapiens	Neu.NPC
GO:0007204	positive regulation of cytosolic calcium...	9	8	4.55	0.02026	0.0711868	hsapiens	Neu.NPC
GO:0045333	cellular respiration	9	8	4.55	0.02026	0.0711868	hsapiens	Neu.NPC
GO:1901566	organonitrogen compound biosynthetic pro...	74	46	37.38	0.02136	0.0711868	hsapiens	Neu.NPC
GO:0044255	cellular lipid metabolic process	37	25	18.69	0.02346	0.0711868	hsapiens	Neu.NPC
GO:0006412	translation	44	29	22.23	0.02396	0.0711868	hsapiens	Neu.NPC
GO:0006457	protein folding	17	13	8.59	0.02534	0.0711868	hsapiens	Neu.NPC
GO:0016311	dephosphorylation	22	16	11.11	0.02697	0.0711868	hsapiens	Neu.NPC
GO:0006986	response to unfolded protein	14	11	7.07	0.02975	0.0711868	hsapiens	Neu.NPC
GO:0007040	lysosome organization	5	5	2.53	0.03233	0.0711868	hsapiens	Neu.NPC
GO:0008654	phospholipid biosynthetic process	5	5	2.53	0.03233	0.0711868	hsapiens	Neu.NPC
GO:0010499	proteasomal ubiquitin-independent protei...	5	5	2.53	0.03233	0.0711868	hsapiens	Neu.NPC
GO:0045017	glycerolipid biosynthetic process	5	5	2.53	0.03233	0.0711868	hsapiens	Neu.NPC
GO:0046474	glycerophospholipid biosynthetic process	5	5	2.53	0.03233	0.0711868	hsapiens	Neu.NPC
GO:0051125	regulation of actin nucleation	5	5	2.53	0.03233	0.0711868	hsapiens	Neu.NPC
GO:0080171	lytic vacuole organization	5	5	2.53	0.03233	0.0711868	hsapiens	Neu.NPC
GO:0006396	RNA processing	59	37	29.8	0.03251	0.0711868	hsapiens	Neu.NPC
GO:0051047	positive regulation of secretion	19	14	9.6	0.03286	0.0711868	hsapiens	Neu.NPC
GO:0051259	protein complex oligomerization	11	9	5.56	0.03398	0.0711868	hsapiens	Neu.NPC
GO:0018208	peptidyl-proline modification	8	7	4.04	0.03649	0.0711868	hsapiens	Neu.NPC
GO:0030239	myofibril assembly	8	7	4.04	0.03649	0.0711868	hsapiens	Neu.NPC
GO:0045727	positive regulation of translation	8	7	4.04	0.03649	0.0711868	hsapiens	Neu.NPC
GO:0000910	cytokinesis	16	12	8.08	0.03985	0.0711868	hsapiens	Neu.NPC
GO:0017148	negative regulation of translation	16	12	8.08	0.03985	0.0711868	hsapiens	Neu.NPC
GO:0034249	negative regulation of cellular amide me...	16	12	8.08	0.03985	0.0711868	hsapiens	Neu.NPC
GO:0006470	protein dephosphorylation	21	15	10.61	0.04052	0.0711868	hsapiens	Neu.NPC
GO:0051301	cell division	51	32	25.76	0.04579	0.0711868	hsapiens	Neu.NPC
GO:0030048	actin filament-based movement	18	13	9.09	0.04997	0.0711868	hsapiens	Neu.NPC
GO:1903532	positive regulation of secretion by cell	18	13	9.09	0.04997	0.0711868	hsapiens	Neu.NPC
GO:0050808	synapse organization	30	20	15.15	0.05079	0.0711868	hsapiens	Neu.NPC
GO:0008380	RNA splicing	46	29	23.24	0.0524	0.0711868	hsapiens	Neu.NPC
GO:0043604	amide biosynthetic process	48	30	24.25	0.05623	0.0711868	hsapiens	Neu.NPC
GO:0009615	response to virus	10	8	5.05	0.05683	0.0711868	hsapiens	Neu.NPC
GO:0019395	fatty acid oxidation	10	8	5.05	0.05683	0.0711868	hsapiens	Neu.NPC
GO:0030049	muscle filament sliding	10	8	5.05	0.05683	0.0711868	hsapiens	Neu.NPC
GO:0030258	lipid modification	10	8	5.05	0.05683	0.0711868	hsapiens	Neu.NPC
GO:0033275	actin-myosin filament sliding	10	8	5.05	0.05683	0.0711868	hsapiens	Neu.NPC
GO:0034440	lipid oxidation	10	8	5.05	0.05683	0.0711868	hsapiens	Neu.NPC
GO:0045921	positive regulation of exocytosis	10	8	5.05	0.05683	0.0711868	hsapiens	Neu.NPC
GO:0006091	generation of precursor metabolites and ...	34	22	17.17	0.06251	0.0711868	hsapiens	Neu.NPC
GO:0000212	meiotic spindle organization	4	4	2.02	0.06445	0.0711868	hsapiens	Neu.NPC
GO:0001845	phagolysosome assembly	4	4	2.02	0.06445	0.0711868	hsapiens	Neu.NPC
GO:0006099	tricarboxylic acid cycle	4	4	2.02	0.06445	0.0711868	hsapiens	Neu.NPC
GO:0006479	protein methylation	4	4	2.02	0.06445	0.0711868	hsapiens	Neu.NPC
GO:0008213	protein alkylation	4	4	2.02	0.06445	0.0711868	hsapiens	Neu.NPC
GO:0010469	regulation of signaling receptor activit...	4	4	2.02	0.06445	0.0711868	hsapiens	Neu.NPC
GO:0032456	endocytic recycling	4	4	2.02	0.06445	0.0711868	hsapiens	Neu.NPC
GO:0033119	negative regulation of RNA splicing	4	4	2.02	0.06445	0.0711868	hsapiens	Neu.NPC
GO:0034315	regulation of Arp2/3 complex-mediated ac...	4	4	2.02	0.06445	0.0711868	hsapiens	Neu.NPC
GO:0035970	peptidyl-threonine dephosphorylation	4	4	2.02	0.06445	0.0711868	hsapiens	Neu.NPC
GO:0042035	regulation of cytokine biosynthetic proc...	4	4	2.02	0.06445	0.0711868	hsapiens	Neu.NPC
GO:0042089	cytokine biosynthetic process	4	4	2.02	0.06445	0.0711868	hsapiens	Neu.NPC
GO:0042107	cytokine metabolic process	4	4	2.02	0.06445	0.0711868	hsapiens	Neu.NPC
GO:0043489	RNA stabilization	4	4	2.02	0.06445	0.0711868	hsapiens	Neu.NPC
GO:0045109	intermediate filament organization	4	4	2.02	0.06445	0.0711868	hsapiens	Neu.NPC
GO:0046503	glycerolipid catabolic process	4	4	2.02	0.06445	0.0711868	hsapiens	Neu.NPC
GO:0048255	mRNA stabilization	4	4	2.02	0.06445	0.0711868	hsapiens	Neu.NPC
GO:0070059	intrinsic apoptotic signaling pathway in...	4	4	2.02	0.06445	0.0711868	hsapiens	Neu.NPC
GO:0072673	lamellipodium morphogenesis	4	4	2.02	0.06445	0.0711868	hsapiens	Neu.NPC
GO:1902369	negative regulation of RNA catabolic pro...	4	4	2.02	0.06445	0.0711868	hsapiens	Neu.NPC
GO:1902373	negative regulation of mRNA catabolic pr...	4	4	2.02	0.06445	0.0711868	hsapiens	Neu.NPC
GO:0006397	mRNA processing	43	27	21.72	0.06446	0.0711868	hsapiens	Neu.NPC
GO:0022900	electron transport chain	7	6	3.54	0.06478	0.0711868	hsapiens	Neu.NPC
GO:0033120	positive regulation of RNA splicing	7	6	3.54	0.06478	0.0711868	hsapiens	Neu.NPC
GO:0045103	intermediate filament-based process	7	6	3.54	0.06478	0.0711868	hsapiens	Neu.NPC
GO:0045104	intermediate filament cytoskeleton organ...	7	6	3.54	0.06478	0.0711868	hsapiens	Neu.NPC
GO:0048026	positive regulation of mRNA splicing, vi...	7	6	3.54	0.06478	0.0711868	hsapiens	Neu.NPC
GO:0050685	positive regulation of mRNA processing	7	6	3.54	0.06478	0.0711868	hsapiens	Neu.NPC
GO:0010608	posttranscriptional regulation of gene e...	54	33	27.28	0.06746	0.0725638	hsapiens	Neu.NPC
GO:0000377	RNA splicing, via transesterification re...	36	23	18.18	0.06821	0.0725638	hsapiens	Neu.NPC
GO:0000398	mRNA splicing, via spliceosome	36	23	18.18	0.06821	0.0725638	hsapiens	Neu.NPC
GO:0000375	RNA splicing, via transesterification re...	38	24	19.19	0.0738	0.0767071	hsapiens	Neu.NPC
GO:0030833	regulation of actin filament polymerizat...	17	12	8.59	0.07469	0.0767071	hsapiens	Neu.NPC
GO:0046034	ATP metabolic process	17	12	8.59	0.07469	0.0767071	hsapiens	Neu.NPC
GO:0034620	cellular response to unfolded protein	12	9	6.06	0.07594	0.0767071	hsapiens	Neu.NPC
GO:0072329	monocarboxylic acid catabolic process	12	9	6.06	0.07594	0.0767071	hsapiens	Neu.NPC
GO:0044282	small molecule catabolic process	31	20	15.66	0.07753	0.07753	hsapiens	Neu.NPC
GO:0051716	cellular response to stimulus	179	109	81.73	3.5e-06	0.000194	drerio	Neu.Stem
GO:0065008	regulation of biological quality	88	60	40.18	6.2e-06	0.000194	drerio	Neu.Stem
GO:0006810	transport	144	90	65.75	7.1e-06	0.000194	drerio	Neu.Stem
GO:0007165	signal transduction	103	68	47.03	8e-06	0.000194	drerio	Neu.Stem
GO:0070647	protein modification by small protein co...	31	26	14.15	9.7e-06	0.000194	drerio	Neu.Stem
GO:0007154	cell communication	106	69	48.4	1.4e-05	0.000214286	drerio	Neu.Stem
GO:0055085	transmembrane transport	14	14	6.39	1.5e-05	0.000214286	drerio	Neu.Stem
GO:0023052	signaling	107	69	48.86	2.4e-05	0.00026	drerio	Neu.Stem
GO:0051179	localization	190	112	86.75	2.4e-05	0.00026	drerio	Neu.Stem
GO:0051234	establishment of localization	149	91	68.03	2.6e-05	0.00026	drerio	Neu.Stem
GO:0043412	macromolecule modification	159	96	72.6	2.9e-05	0.000263636	drerio	Neu.Stem
GO:0006457	protein folding	20	18	9.13	3.8e-05	0.000316667	drerio	Neu.Stem
GO:0035556	intracellular signal transduction	54	39	24.66	4.3e-05	0.000330769	drerio	Neu.Stem
GO:0006928	movement of cell or subcellular componen...	56	40	25.57	5.1e-05	0.000364286	drerio	Neu.Stem
GO:0050896	response to stimulus	213	122	97.25	6.6e-05	0.000426316	drerio	Neu.Stem
GO:0006811	ion transport	19	17	8.68	7.8e-05	0.000426316	drerio	Neu.Stem
GO:0018193	peptidyl-amino acid modification	48	35	21.92	7.9e-05	0.000426316	drerio	Neu.Stem
GO:0006464	cellular protein modification process	152	91	69.4	8.1e-05	0.000426316	drerio	Neu.Stem
GO:0036211	protein modification process	152	91	69.4	8.1e-05	0.000426316	drerio	Neu.Stem
GO:0044267	cellular protein metabolic process	192	111	87.67	9.5e-05	0.000475	drerio	Neu.Stem
GO:1901565	organonitrogen compound catabolic proces...	27	22	12.33	0.00012	0.000571429	drerio	Neu.Stem
GO:1901564	organonitrogen compound metabolic proces...	238	133	108.67	0.00015	0.000652174	drerio	Neu.Stem
GO:0033554	cellular response to stress	72	48	32.87	0.00015	0.000652174	drerio	Neu.Stem
GO:0000413	protein peptidyl-prolyl isomerization	11	11	5.02	0.00017	0.00068	drerio	Neu.Stem
GO:0018208	peptidyl-proline modification	11	11	5.02	0.00017	0.00068	drerio	Neu.Stem
GO:0022008	neurogenesis	68	45	31.05	0.00032	0.00123077	drerio	Neu.Stem
GO:0000209	protein polyubiquitination	10	10	4.57	0.00037	0.00127586	drerio	Neu.Stem
GO:0007018	microtubule-based movement	10	10	4.57	0.00037	0.00127586	drerio	Neu.Stem
GO:0007264	small GTPase mediated signal transductio...	10	10	4.57	0.00037	0.00127586	drerio	Neu.Stem
GO:0048699	generation of neurons	63	42	28.77	0.00041	0.00129412	drerio	Neu.Stem
GO:0042592	homeostatic process	40	29	18.26	0.00041	0.00129412	drerio	Neu.Stem
GO:0016043	cellular component organization	317	169	144.74	0.00042	0.00129412	drerio	Neu.Stem
GO:0046907	intracellular transport	76	49	34.7	0.00044	0.00129412	drerio	Neu.Stem
GO:0051128	regulation of cellular component organiz...	76	49	34.7	0.00044	0.00129412	drerio	Neu.Stem
GO:0030030	cell projection organization	56	38	25.57	0.00046	0.00131429	drerio	Neu.Stem
GO:0006302	double-strand break repair	22	18	10.05	0.0005	0.00137838	drerio	Neu.Stem
GO:0030182	neuron differentiation	58	39	26.48	0.00051	0.00137838	drerio	Neu.Stem
GO:0006950	response to stress	92	57	42.01	0.00068	0.00178261	drerio	Neu.Stem
GO:0019538	protein metabolic process	203	113	92.69	0.00075	0.00178261	drerio	Neu.Stem
GO:0097435	supramolecular fiber organization	48	33	21.92	0.00078	0.00178261	drerio	Neu.Stem
GO:0006414	translational elongation	9	9	4.11	0.00082	0.00178261	drerio	Neu.Stem
GO:0006820	anion transport	9	9	4.11	0.00082	0.00178261	drerio	Neu.Stem
GO:0032392	DNA geometric change	9	9	4.11	0.00082	0.00178261	drerio	Neu.Stem
GO:0032508	DNA duplex unwinding	9	9	4.11	0.00082	0.00178261	drerio	Neu.Stem
GO:0050808	synapse organization	9	9	4.11	0.00082	0.00178261	drerio	Neu.Stem
GO:0051347	positive regulation of transferase activ...	9	9	4.11	0.00082	0.00178261	drerio	Neu.Stem
GO:0007015	actin filament organization	36	26	16.44	0.00092	0.00195745	drerio	Neu.Stem
GO:0007010	cytoskeleton organization	89	55	40.64	0.00094	0.00195833	drerio	Neu.Stem
GO:0120036	plasma membrane bounded cell projection ...	54	36	24.66	0.0011	0.0022449	drerio	Neu.Stem
GO:0010769	regulation of cell morphogenesis involve...	12	11	5.48	0.00118	0.00236	drerio	Neu.Stem
GO:0022604	regulation of cell morphogenesis	15	13	6.85	0.00121	0.00237255	drerio	Neu.Stem
GO:0032446	protein modification by small protein co...	23	18	10.5	0.00132	0.00253846	drerio	Neu.Stem
GO:0000902	cell morphogenesis	35	25	15.98	0.00151	0.0028	drerio	Neu.Stem
GO:0071840	cellular component organization or bioge...	338	176	154.33	0.00165	0.0028	drerio	Neu.Stem
GO:0006906	vesicle fusion	8	8	3.65	0.00182	0.0028	drerio	Neu.Stem
GO:0007265	Ras protein signal transduction	8	8	3.65	0.00182	0.0028	drerio	Neu.Stem
GO:0016579	protein deubiquitination	8	8	3.65	0.00182	0.0028	drerio	Neu.Stem
GO:0030705	cytoskeleton-dependent intracellular tra...	8	8	3.65	0.00182	0.0028	drerio	Neu.Stem
GO:0033674	positive regulation of kinase activity	8	8	3.65	0.00182	0.0028	drerio	Neu.Stem
GO:0034220	ion transmembrane transport	8	8	3.65	0.00182	0.0028	drerio	Neu.Stem
GO:0045860	positive regulation of protein kinase ac...	8	8	3.65	0.00182	0.0028	drerio	Neu.Stem
GO:0048284	organelle fusion	8	8	3.65	0.00182	0.0028	drerio	Neu.Stem
GO:0070646	protein modification by small protein re...	8	8	3.65	0.00182	0.0028	drerio	Neu.Stem
GO:0090174	organelle membrane fusion	8	8	3.65	0.00182	0.0028	drerio	Neu.Stem
GO:0099518	vesicle cytoskeletal trafficking	8	8	3.65	0.00182	0.0028	drerio	Neu.Stem
GO:0051649	establishment of localization in cell	87	53	39.72	0.00191	0.00283333	drerio	Neu.Stem
GO:0030029	actin filament-based process	57	37	26.03	0.00198	0.00283333	drerio	Neu.Stem
GO:0030036	actin cytoskeleton organization	57	37	26.03	0.00198	0.00283333	drerio	Neu.Stem
GO:0031344	regulation of cell projection organizati...	17	14	7.76	0.00204	0.00283333	drerio	Neu.Stem
GO:0034330	cell junction organization	17	14	7.76	0.00204	0.00283333	drerio	Neu.Stem
GO:0043414	macromolecule methylation	17	14	7.76	0.00204	0.00283333	drerio	Neu.Stem
GO:0120035	regulation of plasma membrane bounded ce...	17	14	7.76	0.00204	0.00283333	drerio	Neu.Stem
GO:0006479	protein methylation	14	12	6.39	0.00235	0.00317568	drerio	Neu.Stem
GO:0008213	protein alkylation	14	12	6.39	0.00235	0.00317568	drerio	Neu.Stem
GO:0050770	regulation of axonogenesis	11	10	5.02	0.00241	0.00321333	drerio	Neu.Stem
GO:0048856	anatomical structure development	264	140	120.54	0.00262	0.00344737	drerio	Neu.Stem
GO:0048468	cell development	86	52	39.27	0.00269	0.00349351	drerio	Neu.Stem
GO:0032989	cellular component morphogenesis	38	26	17.35	0.00327	0.00402	drerio	Neu.Stem
GO:0032990	cell part morphogenesis	31	22	14.15	0.00338	0.00402	drerio	Neu.Stem
GO:0048812	neuron projection morphogenesis	31	22	14.15	0.00338	0.00402	drerio	Neu.Stem
GO:0048858	cell projection morphogenesis	31	22	14.15	0.00338	0.00402	drerio	Neu.Stem
GO:0120039	plasma membrane bounded cell projection ...	31	22	14.15	0.00338	0.00402	drerio	Neu.Stem
GO:0048666	neuron development	49	32	22.37	0.00352	0.00402	drerio	Neu.Stem
GO:0031175	neuron projection development	40	27	18.26	0.00367	0.00402	drerio	Neu.Stem
GO:0006511	ubiquitin-dependent protein catabolic pr...	16	13	7.31	0.00377	0.00402	drerio	Neu.Stem
GO:0006520	cellular amino acid metabolic process	16	13	7.31	0.00377	0.00402	drerio	Neu.Stem
GO:0019725	cellular homeostasis	16	13	7.31	0.00377	0.00402	drerio	Neu.Stem
GO:0019941	modification-dependent protein catabolic...	16	13	7.31	0.00377	0.00402	drerio	Neu.Stem
GO:0006468	protein phosphorylation	51	33	23.29	0.0038	0.00402	drerio	Neu.Stem
GO:0040007	growth	33	23	15.07	0.00395	0.00402	drerio	Neu.Stem
GO:0000727	double-strand break repair via break-ind...	7	7	3.2	0.00402	0.00402	drerio	Neu.Stem
GO:0006267	pre-replicative complex assembly involve...	7	7	3.2	0.00402	0.00402	drerio	Neu.Stem
GO:0006268	DNA unwinding involved in DNA replicatio...	7	7	3.2	0.00402	0.00402	drerio	Neu.Stem
GO:0006270	DNA replication initiation	7	7	3.2	0.00402	0.00402	drerio	Neu.Stem
GO:0015711	organic anion transport	7	7	3.2	0.00402	0.00402	drerio	Neu.Stem
GO:0030048	actin filament-based movement	7	7	3.2	0.00402	0.00402	drerio	Neu.Stem
GO:0030050	vesicle transport along actin filament	7	7	3.2	0.00402	0.00402	drerio	Neu.Stem
GO:0031098	stress-activated protein kinase signalin...	7	7	3.2	0.00402	0.00402	drerio	Neu.Stem
GO:0032147	activation of protein kinase activity	7	7	3.2	0.00402	0.00402	drerio	Neu.Stem
GO:0035966	response to topologically incorrect prot...	7	7	3.2	0.00402	0.00402	drerio	Neu.Stem
