# Supplementary material for: Conserved exchange of paralog proteins during neuronal differentiation
Source: bioRxiv preprint, doi:10.1101/2021.07.22.453347, version 1 (2021-07-23)
Supplement: Table S6 [file 453347_file07.xlsx]

## Sheet: Summary
Subunits Co-Expression
Protein complex subunit co-expression stability data during neuronal differentiation (MS data)
	column names
	pvalue	subunit stability p value. Low p values indicate subunits that are highly co-expressed with their protein complex
	dist	the median distance of fold change of a specific subunit with the rest of its protein complex
	Zscore	fold change Z-score for each specific subunits inside each protein complex.
	subunits	gene name for specific subunit
	FoldChange	log2 fold-change value for that specific subunit in each specific comparison
	Complex	protein complex name
	cond	the neurogenesis time-point comparison
	has.Paralogs	value that indicate wheater a specific subunit has paralog in the given genome.
	species	reference organism

## Sheet: Subunits Co-Expression
pvalue	dist	Zscore	subunits	FoldChange	Complex	cond	has.Paralogs	species
1	6.71043	-1.78859	DNMT3B	-6.8249	DNMT3B	NPC.iPS	TRUE	hsapiens
1	8.50948	1.53516	LAMB1	9.86854	ITGA6-ITGB4-Laminin10/12 complex	Neu.IPS	TRUE	hsapiens
1	4.67392	2.14998	TUBA4A	4.67076	FIB-associated protein complex	DIV14.DIV1	TRUE	rnorvegicus
1	5.08596	1.6485	TUBA4A	4.67076	ASCOM complex	DIV14.DIV1	TRUE	rnorvegicus
1	2.711	1.6341	TUBA4A	2.296	60S APC containing complex	DIV14.DIV5	TRUE	rnorvegicus
1	4.41204	-1.76028	RBP1	-3.36188	RalBP1-CCNB1-AP2A-NUMB-EPN1 complex	D10.D0	TRUE	mmusculus
1	4.47557	2.89711	CLU	3.80688	eIF3	D10.D0	FALSE	mmusculus
0.999	3.58529	2.43642	CLU	3.214	eIF3	DIV14.DIV5	TRUE	rnorvegicus
0.999	2.5566	2.43595	CLU	2.20291	eIF3	D3.D0	FALSE	mmusculus
0.998	2.22783	1.65089	ACSL4	2.83324	Fatty Acid Import Complex	DIV5.DIV1	TRUE	rnorvegicus
0.998	2.35583	2.22712	JUP	1.65199	Polycystin-1 multiprotein complex (ACTN1; CDH1; SRC; JUP; VCL; CTNNB1; PXN; BCAR1; PKD1; PTK2; TLN1)	D3.D0	TRUE	mmusculus
0.997	7.27935	1.8735	EEF1A2	5.50876	eEF1	Neu.IPS	TRUE	hsapiens
0.997	2.275	-1.75773	RBP1	-1.58087	RalBP1-CCNB1-AP2A-NUMB-EPN1 complex	D10.D3	TRUE	mmusculus
0.996	3.84404	1.72941	MCM6	5.49012	emerin C24	Neur.Stem	TRUE	drerio
0.995	4.31318	1.66778	RBP1	3.78314	RalBP1-CCNB1-AP2A-NUMB-EPN1 complex	NPC.iPS	TRUE	hsapiens
0.995	3.7186	2.16812	TUBA4A	4.67076	Tubulins	DIV14.DIV1	TRUE	rnorvegicus
0.995	2.35236	2.27813	HSPA2	1.89575	RSC	D10.D3	TRUE	mmusculus
0.995	2.13704	-1.69326	RBP1	-1.78101	RalBP1-CCNB1-AP2A-NUMB-EPN1 complex	D3.D0	TRUE	mmusculus
0.994	3.82562	1.51469	TUBA1A	4.61259	FIB-associated protein complex	Neur.Stem	TRUE	drerio
0.994	4.09897	1.65363	MCM6	5.49012	MCM complex	Neur.Stem	TRUE	drerio
0.993	5.34356	1.7703	HDGFRP3	4.99006	ISW1b complex	Neu.IPS	FALSE	hsapiens
0.993	5.37483	1.78534	EEF1A2	3.78364	eEF1	Neu.NPC	TRUE	hsapiens
0.993	2.4702	1.93224	TUBA4A	2.296	FIB-associated protein complex	DIV14.DIV5	TRUE	rnorvegicus
0.992	3.93747	2.8535	YWHAQB	4.51658	Kinase maturation complex 1	Neur.Stem	TRUE	drerio
0.992	2.91251	-1.43298	HDAC1	-2.967	Emerin regulatory complex	D10.D0	TRUE	mmusculus
0.992	2.00379	2.59211	ACTR3B	2.49338	Arp2/3 protein complex	D10.D3	TRUE	mmusculus
0.99	5.02786	0.488318	LAMC1	5.22637	ITGA6-ITGB4-Laminin10/12 complex	Neu.IPS	TRUE	hsapiens
0.99	2.39068	1.68395	ATAD3A	1.15782	SRCAP	DIV14.DIV1	FALSE	rnorvegicus
0.99	2.67265	1.76669	EEF1A2	2.53799	eEF1	DIV14.DIV1	TRUE	rnorvegicus
0.99	2.0049	-2.38686	H2AFX	-2.66488	H2AX complex; isolated from cells without IR exposure	D10.D3	FALSE	mmusculus
0.99	1.91897	1.76252	CLU	1.60397	eIF3	D10.D3	FALSE	mmusculus
0.99	2.16896	-2.68886	PDCD4	-2.41158	emerin C52	D3.D0	FALSE	mmusculus
0.989	3.89739	2.64672	ATP6V0A1	5.45556	H+transporting ATPase; vacuolar	Neu.NPC	TRUE	hsapiens
0.989	3.92629	1.94738	SNAP25	3.5427	Sro1p/Sec4p/Sec9p complex	Neu.NPC	TRUE	hsapiens
0.989	2.81292	-0.911744	RBBP5	-1.64834	ASCOM complex	DIV14.DIV1	TRUE	rnorvegicus
0.989	2.16643	1.88573	TUBA4A	2.296	Tubulins	DIV14.DIV5	TRUE	rnorvegicus
0.989	1.77863	-1.77667	HDAC1	-1.25844	Emerin regulatory complex	D3.D0	TRUE	mmusculus
0.988	2.9899	-2.23577	FLNA	-1.36138	COMPASS complex	Neur.Stem	TRUE	drerio
0.987	1.759	-1.06026	IQGAP1	-1.28	60S APC containing complex	DIV14.DIV5	TRUE	rnorvegicus
0.987	2.83635	-1.74598	WDR92	-0.847357	calcineurin complex	D10.D0	TRUE	mmusculus
0.986	4.32003	1.7764	HDGFRP3	3.64751	ISW1b complex	Neu.NPC	FALSE	hsapiens
0.986	3.2868	1.19492	MCM3	4.51551	MCM complex	Neur.Stem	TRUE	drerio
0.984	3.61196	2.07944	GNAO1	4.30424	heterotrimeric G-protein complex	Neu.NPC	TRUE	hsapiens
0.983	1.58208	2.33538	ATP6V1G2	2.27816	H+transporting ATPase; vacuolar	DIV5.DIV1	TRUE	rnorvegicus
0.983	1.62712	1.64211	AK6	0.339062	TFIID complex	D10.D3	TRUE	mmusculus
0.982	4.51619	-2.28106	KPNA2	-4.97042	Nuclear cap binding complex (NCBC)	Neu.IPS	TRUE	hsapiens
0.982	2.90468	-1.3068	C1QBP	-0.294491	emerin C24	Neur.Stem	FALSE	drerio
0.982	2.97045	1.81071	EWSR1A	5.10396	Large Drosha complex	Neur.Stem	TRUE	drerio
0.981	4.46439	-0.805405	ITGA6	-0.51056	ITGA6-ITGB4-Laminin10/12 complex	Neu.IPS	TRUE	hsapiens
0.981	2.87966	-1.98107	HSPA5	-1.06982	RSC	Neur.Stem	TRUE	drerio
0.98	4.65685	-1.71676	DNMT3B	-6.01854	DNMT3B	Neu.IPS	TRUE	hsapiens
0.98	1.739	-1.74279	CHAF1B	-1.83131	chromatin assembly complex	D3.D0	FALSE	mmusculus
0.979	4.229	1.96166	TERF2IP	3.28353	Rap1 complex	Neu.IPS	FALSE	hsapiens
0.979	3.27837	-2.61746	IQGAP1	-3.79436	emerin C52	Neu.NPC	TRUE	hsapiens
0.979	2.84611	1.44549	STX1A	4.07403	SNARE complex	D10.D0	TRUE	mmusculus
0.978	2.72248	-2.18123	PPP2R1B	-2.28426	protein phosphatase type 2A complex (Rts1p)	D10.D0	TRUE	mmusculus
0.978	1.59334	1.14476	ACTG1	0.473211	Emerin regulatory complex	D10.D3	TRUE	mmusculus
0.978	1.87723	3.20366	MRPS16	1.90697	mitochondrial ribosomal small subunit	D10.D3	FALSE	mmusculus
0.978	1.69006	-2.67137	MSI1	-1.7212	mRNA cleavage factor complex (CFI)	D3.D0	TRUE	mmusculus
0.978	1.67618	1.30276	STX1A	2.24878	SNARE complex	D3.D0	TRUE	mmusculus
0.977	3.17332	3.01367	CKB	3.24131	emerin C52	NPC.iPS	TRUE	hsapiens
0.977	2.53437	-2.18131	IPO4	-2.77788	H3.3 com	NPC.iPS	TRUE	hsapiens
0.977	2.43889	1.98308	ATP6V1G2	4.0358	H+transporting ATPase; vacuolar	DIV14.DIV1	TRUE	rnorvegicus
0.977	1.7246	-1.86892	RBP1	-1.18	RalBP1-CCNB1-AP2A-NUMB-EPN1 complex	DIV14.DIV5	TRUE	rnorvegicus
0.977	1.56056	-1.38876	CYFIP1	-0.705995	Wave-2 complex	D10.D3	TRUE	mmusculus
0.977	1.71891	-2.62902	HNRNPA0	-2.56571	mRNA cleavage factor complex (CFI)	D10.D3	TRUE	mmusculus
0.977	1.64612	1.12528	HNRNPU	0.399755	emerin C24	D3.D0	TRUE	mmusculus
0.976	2.89639	-0.962085	EEF1D	-3.10905	eEF1	Neu.NPC	TRUE	hsapiens
0.976	3.05052	-1.85952	DDX1	-0.453854	Large Drosha complex	Neur.Stem	TRUE	drerio
0.976	2.53294	1.77708	PARP1	2.73931	Rap1 complex	Neur.Stem	TRUE	drerio
0.976	2.29615	1.1018	TUBB2A	3.0451	Tubulins	DIV14.DIV1	TRUE	rnorvegicus
0.976	1.33564	1.66786	ATAD3A	0.649004	SRCAP	DIV5.DIV1	FALSE	rnorvegicus
0.976	1.75581	2.34054	HSPA2	1.89575	HMC Complex	D10.D3	TRUE	mmusculus
0.976	1.74443	-1.35581	STX4A	-0.74426	SNARE complex	D3.D0	TRUE	mmusculus
0.975	2.92623	-1.93714	HSPB1	-3.37974	Spliceosome-B	NPC.iPS	TRUE	hsapiens
0.975	4.8155	-2.722	IQGAP1	-4.94947	emerin C52	Neu.IPS	TRUE	hsapiens
0.974	4.09238	-0.693548	ITGB4	-0.01454	ITGA6-ITGB4-Laminin10/12 complex	Neu.IPS	TRUE	hsapiens
0.974	2.49308	-1.79898	HSPA5	-1.06982	H2AX complex; isolated from cells without IR exposure	Neur.Stem	TRUE	drerio
0.974	2.358	-0.665992	PRKAG1	-1.04178	ASCOM complex	DIV14.DIV1	FALSE	rnorvegicus
0.974	1.37289	-2.27619	SP1	-1.82087	HCF-1N	DIV5.DIV1	TRUE	rnorvegicus
0.974	1.59808	-1.58918	ARHGAP17	-1.78748	RICH1/AMOT polarity complex; Flag-Rich1 precipitated	D3.D0	TRUE	mmusculus
0.973	1.3691	1.30459	PAK6	2.18415	Cdc42p/Ste20p complex	DIV5.DIV1	TRUE	rnorvegicus
0.973	1.79388	1.65406	ACTR1B	1.29431	RSC	D10.D3	TRUE	mmusculus
0.972	1.5902	-1.62249	MAPK7	-0.992	STE5-MAPK complex	DIV14.DIV5	TRUE	rnorvegicus
0.972	2.4441	-1.38223	CYFIP1	-1.49375	Wave-2 complex	D10.D0	TRUE	mmusculus
0.972	2.59487	2.38356	ACTR3B	3.22598	Arp2/3 protein complex	D10.D0	TRUE	mmusculus
0.971	2.69196	-2.18124	DAZAP1	-2.19749	mRNA cleavage factor complex (CFI)	NPC.iPS	TRUE	hsapiens
0.971	3.84212	-2.23937	EEF1A1	-3.76127	2A-DUB	Neu.IPS	TRUE	hsapiens
0.971	3.80239	1.93265	GNAO1	4.7592	heterotrimeric G-protein complex	Neu.IPS	TRUE	hsapiens
0.971	2.82311	1.64098	TERF2IP	1.87503	Rap1 complex	Neu.NPC	FALSE	hsapiens
0.971	2.69868	2.16878	ILF2	3.00295	DNA-PK-Ku-eIF2-NF90-NF45 complex	Neur.Stem	TRUE	drerio
0.971	1.6055	-1.15349	HIST1H1A	-2.08586	Emerin regulatory complex	D10.D3	FALSE	mmusculus
0.971	1.54763	-1.61256	WDR92	-0.745292	calcineurin complex	D3.D0	TRUE	mmusculus
0.97	3.89078	1.86562	POLR2I	3.02515	RNA polymerase II core complex	Neu.IPS	TRUE	hsapiens
0.97	2.64883	-2.15801	ACTG1	-2.42142	INO80.com	Neu.NPC	TRUE	hsapiens
0.97	2.98081	-2.61305	EEF1A1	-2.8647	mitochondrial ribosomal large subunit	Neu.NPC	TRUE	hsapiens
0.97	2.98167	1.67392	YWHAQB	4.51658	emerin C52	Neur.Stem	TRUE	drerio
0.97	2.41811	-1.96618	UBQLN2	-0.379657	H+transporting ATPase; vacuolar	DIV14.DIV1	TRUE	rnorvegicus
0.97	1.57575	1.76435	EEF1A2	1.324	eEF1	DIV14.DIV5	TRUE	rnorvegicus
0.97	1.55985	1.2922	PPP2R5A	0.612807	HDAC1-PP1	D10.D3	TRUE	mmusculus
0.97	1.63021	1.10897	EMD	0.379868	emerin C24	D3.D0	FALSE	mmusculus
0.97	1.65926	3.68149	GLG1	1.0926	cytoplasmic ribosomal small subunit	D3.D0	FALSE	mmusculus
0.969	3.905	-0.52453	ADRM1	0.734962	ITGA6-ITGB4-Laminin10/12 complex	Neu.IPS	FALSE	hsapiens
0.969	3.84468	-0.989515	EEF1A1	-3.76127	eEF1	Neu.IPS	TRUE	hsapiens
0.969	1.49395	1.7645	PRKAB2	1.30797	Snf1p/Snf4p/Sip2p complex	D10.D3	TRUE	mmusculus
0.969	1.5265	-1.89519	RPA1	-1.66622	RNA polymerase I core complex	D3.D0	FALSE	mmusculus
0.968	2.76268	2.38262	HSPA8	2.39072	HMC Complex	NPC.iPS	TRUE	hsapiens
0.968	2.85597	-2.13239	EEF1A1	-2.8647	2A-DUB	Neu.NPC	TRUE	hsapiens
0.968	2.6803	-1.50473	IQGAP1	-0.740963	emerin C52	Neur.Stem	TRUE	drerio
0.968	2.3881	2.17229	TOP1L	3.10569	RC complex during S-phase of cell cycle	Neur.Stem	TRUE	drerio
0.968	1.25334	1.70213	EEF1A2	1.16717	eEF1	DIV5.DIV1	TRUE	rnorvegicus
0.968	2.53213	1.66503	SNAP25	2.59447	Sro1p/Sec4p/Sec9p complex	D10.D0	TRUE	mmusculus
0.967	2.52995	2.48004	HSPA8	2.39072	HCF-1N	NPC.iPS	TRUE	hsapiens
0.967	2.60068	-1.64386	ACTG1	-2.42142	Profilin 1 complex	Neu.NPC	TRUE	hsapiens
0.966	2.59316	-2.1079	HSPA5	-1.06982	HCF-1N	Neur.Stem	TRUE	drerio
0.966	2.41372	-0.973755	MCMBP	-0.0921864	MCM complex	Neur.Stem	FALSE	drerio
0.966	2.25771	1.7666	RBPJ	1.31158	HES1 promoter-Notch enhancer complex	DIV14.DIV1	TRUE	rnorvegicus
0.966	1.19518	-1.13886	PAK1	0.13273	Cdc42p/Ste20p complex	DIV5.DIV1	TRUE	rnorvegicus
0.966	1.6557	1.87217	TAF9B	0.631647	TAF complex	D10.D3	TRUE	mmusculus
0.965	2.35823	3.57835	GLE1	1.53127	Nuclear pore complex (NPC)	DIV14.DIV1	TRUE	rnorvegicus
0.965	2.0891	2.31625	DDX3X	1.2856	Large Drosha complex	DIV14.DIV1	TRUE	rnorvegicus
0.965	2.37361	-1.23887	HDAC1	-2.967	HDAC1-PP1	D10.D0	TRUE	mmusculus
0.965	1.55105	-1.61145	PPP2CA	-1.07675	RAF1-PPP2-PIN1 complex	D10.D3	TRUE	mmusculus
0.965	1.51252	1.3996	PDIA3	0.236366	HMGB1-HMGB2-HSC70-ERP60-GAPDH complex	D3.D0	TRUE	mmusculus
0.964	2.32625	-0.89949	AP2A2	-1.52841	RalBP1-CCNB1-AP2A-NUMB-EPN1 complex	NPC.iPS	TRUE	hsapiens
0.964	2.42573	-2.02199	GEMIN5	-2.63612	Survival of motor neuron (SMN) complex	NPC.iPS	TRUE	hsapiens
0.964	2.81215	1.26551	JUP	-0.192803	Polycystin-1 multiprotein complex (ACTN1; CDH1; SRC; JUP; VCL; CTNNB1; PXN; BCAR1; PKD1; PTK2; TLN1)	Neu.NPC	TRUE	hsapiens
0.964	2.65546	-1.63264	TUBAL3	-1.6635	Tubulins	Neu.NPC	TRUE	hsapiens
0.963	2.23894	1.82513	ATAD3A	1.15782	NuA4/Tip60 HAT complex	DIV14.DIV1	FALSE	rnorvegicus
0.962	2.48	1.81208	HSPA8	2.39072	Spliceosome-Prp19	NPC.iPS	TRUE	hsapiens
0.962	2.30823	-0.913906	C1QBP	-0.294491	FIB-associated protein complex	Neur.Stem	FALSE	drerio
0.961	2.28923	-1.9837	DKC1	-2.36209	telomerase	NPC.iPS	FALSE	hsapiens
0.961	2.16241	1.64109	HSPA8	2.39072	HMGB1-HMGB2-HSC70-ERP60-GAPDH complex	NPC.iPS	TRUE	hsapiens
0.961	3.41505	-2.10242	POLD1	-4.23602	RC complex during S-phase of cell cycle	Neu.IPS	TRUE	hsapiens
0.961	2.46761	1.45927	DHX9	2.77939	SMN-PolII-RHA complex	Neur.Stem	TRUE	drerio
0.961	1.65736	2.6799	IPO4	0.642721	H3.3 com	D10.D3	TRUE	mmusculus
0.961	1.54015	2.13331	TOP1	-0.181926	RC complex during S-phase of cell cycle	D3.D0	TRUE	mmusculus
0.961	1.39616	-1.54594	DYNC2H1	-0.692526	cytoplasmic dynein complex	D3.D0	TRUE	mmusculus
0.96	2.46258	2.24018	SFPQ	3.80529	CF IIAm complex (Cleavage factor IIAm complex)	Neur.Stem	TRUE	drerio
0.959	2.70092	-0.864688	EEF1A1	-2.8647	eEF1	Neu.NPC	TRUE	hsapiens
0.958	2.44268	1.78798	HNRNPA0A	4.95448	mRNA cleavage factor complex (CFI)	Neur.Stem	TRUE	drerio
0.958	1.23953	1.78216	ATAD3A	0.649004	NuA4/Tip60 HAT complex	DIV5.DIV1	FALSE	rnorvegicus
0.958	2.32034	-1.75263	RPA1	-2.82521	RNA polymerase I core complex	D10.D0	FALSE	mmusculus
0.957	2.00012	-0.0860033	TUBA1A	0.389724	ASCOM complex	DIV14.DIV1	TRUE	rnorvegicus
0.957	1.41433	2.201	UQCRQ	1.872	Cytochrome bc1 complex (Ubiquinol-cytochrome c reductase complex; complex III)	DIV14.DIV5	FALSE	rnorvegicus
0.957	1.33279	-2.65681	SEC23B	-1.20558	COPII	DIV5.DIV1	TRUE	rnorvegicus
0.957	1.58285	-2.04939	PPP2R1B	-1.17738	protein phosphatase type 2A complex (Rts1p)	D3.D0	TRUE	mmusculus
0.956	1.42538	1.40401	CTNNB1	0.421542	TCF4-CTNNB1-SUMO1-EP300-HADAC6 complex	D10.D3	TRUE	mmusculus
0.956	1.66004	-3.95498	RPL29	-1.95539	cytoplasmic ribosomal large subunit	D10.D3	TRUE	mmusculus
0.955	2.22541	1.60583	HIST1H4L	2.9746	H2AX complex; isolated from cells without IR exposure	Neur.Stem	TRUE	drerio
0.955	1.28919	2.08317	HSPA2	1.1119	RSC	DIV5.DIV1	TRUE	rnorvegicus
0.955	1.46033	-1.52438	CNN3	-1.30336	emerin	D10.D3	TRUE	mmusculus
0.955	1.42167	-1.40035	TCF4	-1.85609	TCF4-CTNNB1-SUMO1-EP300-HADAC6 complex	D10.D3	TRUE	mmusculus
0.954	2.2423	2.1315	HSPA8	2.39072	P2X7 receptor signalling complex	NPC.iPS	TRUE	hsapiens
0.954	2.13496	1.69276	HSPA8	2.39072	Profilin 1 complex	NPC.iPS	TRUE	hsapiens
0.954	3.19779	1.78258	TUBB2B	2.6664	Profilin 1 complex	Neu.IPS	TRUE	hsapiens
0.954	1.15961	-1.69312	RPRD1B	-1.14703	RNA Degradation Complex	DIV5.DIV1	TRUE	rnorvegicus
0.954	2.30714	1.20417	PPP2R5A	0.777595	HDAC1-PP1	D10.D0	TRUE	mmusculus
0.953	3.4126	1.929	CKB	2.73009	emerin C52	Neu.IPS	TRUE	hsapiens
0.953	2.40666	-1.43653	CNN3	-2.97869	emerin	Neu.NPC	TRUE	hsapiens
0.953	1.5879	-1.45844	SLTM	-1.58409	eIF3	D10.D3	TRUE	mmusculus
0.952	2.53059	-1.49864	ACTG1	-2.42142	Emerin regulatory complex	Neu.NPC	TRUE	hsapiens
0.952	2.57666	-2.16201	PTBP1	-3.02973	CF IIAm complex (Cleavage factor IIAm complex)	Neu.NPC	TRUE	hsapiens
0.952	2.0626	0.0152411	TUBA1B	0.639612	ASCOM complex	DIV14.DIV1	TRUE	rnorvegicus
0.952	1.16644	2.48243	GNL2	0.783499	Yph1-L	DIV5.DIV1	TRUE	rnorvegicus
0.952	2.53605	2.54659	ATP6V1G2	4.08458	H+transporting ATPase; vacuolar	D10.D0	TRUE	mmusculus
0.951	3.19239	2.5518	ATP6V0A1	5.07985	H+transporting ATPase; vacuolar	Neu.IPS	TRUE	hsapiens
0.951	1.56635	-1.17126	SNAP23	-0.536496	SNARE complex	D3.D0	TRUE	mmusculus
0.95	2.44656	-1.10099	ACTN1	-4.57506	Polycystin-1 multiprotein complex (ACTN1; CDH1; SRC; JUP; VCL; CTNNB1; PXN; BCAR1; PKD1; PTK2; TLN1)	Neu.NPC	TRUE	hsapiens
0.95	1.98831	1.31488	CDK11B	1.47004	Cdc28p/Clb5p complex	Neur.Stem	TRUE	drerio
0.95	2.01109	-1.37923	TOP2A	0.142609	Toposome	Neur.Stem	TRUE	drerio
0.95	1.38129	1.65344	TJP1	0.755	CF IIAm complex (Cleavage factor IIAm complex)	DIV14.DIV5	TRUE	rnorvegicus
0.949	2.28144	2.37356	HSPA8	2.39072	RSC	NPC.iPS	TRUE	hsapiens
0.949	3.20672	1.869	TUBB3	4.59143	Tubulins	Neu.IPS	TRUE	hsapiens
0.949	2.26594	-1.23304	YWHAQA	-0.291592	emerin C52	Neur.Stem	TRUE	drerio
0.947	2.37427	-1.0522	TLN1	-4.4847	Polycystin-1 multiprotein complex (ACTN1; CDH1; SRC; JUP; VCL; CTNNB1; PXN; BCAR1; PKD1; PTK2; TLN1)	Neu.NPC	TRUE	hsapiens
0.947	2.30397	-2.1988	KPNA2	-2.87397	Nuclear cap binding complex (NCBC)	Neu.NPC	TRUE	hsapiens
0.947	1.0407	-0.741797	SLC27A1	0.250157	Fatty Acid Import Complex	DIV5.DIV1	TRUE	rnorvegicus
0.946	2.15458	2.34664	SEC23A	2.06139	COPII	NPC.iPS	TRUE	hsapiens
0.946	3.26132	-2.27714	IPO4	-4.2885	H3.3 com	Neu.IPS	TRUE	hsapiens
0.946	2.28381	0.497268	FBL	2.55685	FIB-associated protein complex	Neur.Stem	FALSE	drerio
0.946	1.52792	2.49478	GTPBP4	0.901	Yph1-L	DIV14.DIV5	TRUE	rnorvegicus
0.946	1.1002	-0.815284	SLC27A3	0.170822	Fatty Acid Import Complex	DIV5.DIV1	TRUE	rnorvegicus
0.946	1.13614	-1.6681	RBBP5	-0.962166	ASCOM complex	DIV5.DIV1	TRUE	rnorvegicus
0.946	1.44481	2.37646	HSPA8	0.398573	Spliceosome-Prp19	D10.D3	TRUE	mmusculus
0.945	2.21222	-2.26772	KPNA2	-2.09646	Nuclear cap binding complex (NCBC)	NPC.iPS	TRUE	hsapiens
0.945	2.07349	1.71101	PARP1	2.73931	H3.3 com	Neur.Stem	TRUE	drerio
0.945	2.05502	1.80872	PARP1	2.73931	RC complex during S-phase of cell cycle	Neur.Stem	TRUE	drerio
0.945	1.32253	-0.814648	HDAC1	-1.70856	Emerin regulatory complex	D10.D3	TRUE	mmusculus
0.945	1.46566	1.52994	SPTAN1	1.20463	emerin	D10.D3	TRUE	mmusculus
0.945	1.30549	-1.4627	HDGF	-1.45475	ISW1b complex	D3.D0	TRUE	mmusculus
0.944	2.26534	1.42817	PRKAR2B	3.66051	cAMP-dependent protein kinase	Neu.NPC	TRUE	hsapiens
0.943	3.00903	1.64277	TP53BP1	2.46782	53BP1-containing complex	Neu.IPS	FALSE	hsapiens
0.943	2.2148	2.55569	FBL	2.55685	TNF-alpha/NF-kappa B signaling complex 6	Neur.Stem	FALSE	drerio
0.943	1.92238	-0.884285	PRMT1	-0.983209	FIB-associated protein complex	DIV14.DIV1	TRUE	rnorvegicus
0.943	2.31081	2.00243	GSPT2	1.81588	SMG-1-Upf1-eRF1-eRF3 complex (SURF)	D10.D0	TRUE	mmusculus
0.943	1.33366	0.833803	ACTB	0.126968	Emerin regulatory complex	D10.D3	TRUE	mmusculus
0.943	1.41939	-1.65029	SNRPG	-1.99032	Survival of motor neuron (SMN) complex	D10.D3	TRUE	mmusculus
0.943	1.28872	-1.58003	WDR92	-0.102065	calcineurin complex	D10.D3	TRUE	mmusculus
0.942	2.05908	-1.53382	POLR2L	-1.78244	RNA polymerase II core complex	NPC.iPS	TRUE	hsapiens
0.942	2.37291	0.969013	CTNNB1	-0.741853	Polycystin-1 multiprotein complex (ACTN1; CDH1; SRC; JUP; VCL; CTNNB1; PXN; BCAR1; PKD1; PTK2; TLN1)	Neu.NPC	TRUE	hsapiens
0.942	2.23207	2.5158	YWHAB	1.48764	emerin C25	Neu.NPC	TRUE	hsapiens
0.942	1.43586	-1.24982	TUBAL3	-0.856	Tubulins	DIV14.DIV5	TRUE	rnorvegicus
0.942	2.27038	-1.68674	ARHGAP17	-2.29001	RICH1/AMOT polarity complex; Flag-Rich1 precipitated	D10.D0	TRUE	mmusculus
0.942	1.51824	2.21771	CACTIN	0.468754	Spliceosome-C	D10.D3	TRUE	mmusculus
0.942	1.53944	-2.34014	RPS18	-1.14763	mitochondrial ribosomal small subunit	D3.D0	TRUE	mmusculus
0.941	2.23033	0.21859	EEF1G	-0.146993	eEF1	Neu.NPC	TRUE	hsapiens
0.941	2.16638	-1.22258	DDX3XA	0.510658	Large Drosha complex	Neur.Stem	TRUE	drerio
0.941	1.9414	1.69782	SAFB	2.66991	eIF3	Neur.Stem	TRUE	drerio
0.94	2.07387	2.10906	AIMP2	0.73679	multi-tRNAsynthase complex	NPC.iPS	FALSE	hsapiens
0.94	2.21992	-1.39954	PRKAR1A	0.0723	cAMP-dependent protein kinase	Neu.NPC	TRUE	hsapiens
0.94	2.26817	-1.2348	C1QBP	-0.294491	emerin C52	Neur.Stem	FALSE	drerio
0.94	1.30825	1.42231	MRE11A	0.673	Rap1 complex	DIV14.DIV5	FALSE	rnorvegicus
0.939	3.04585	-0.681121	EEF1D	-2.76273	eEF1	Neu.IPS	TRUE	hsapiens
0.939	2.21652	1.32304	ACTB	0.98403	emerin	Neu.NPC	TRUE	hsapiens
0.939	2.26174	1.39058	TUBB3	2.76198	Tubulins	Neu.NPC	TRUE	hsapiens
0.939	1.3178	1.4432	SPTAN1	1.131	emerin	DIV14.DIV5	TRUE	rnorvegicus
0.939	1.34186	-1.11161	HDAC1	-1.70856	HDAC1-PP1	D10.D3	TRUE	mmusculus
0.938	2.2931	1.92129	HIST1H4L	2.9746	H3.3 com	Neur.Stem	TRUE	drerio
0.938	1.10984	1.69901	JUP	0.714741	Polycystin-1 multiprotein complex (ACTN1; CDH1; SRC; JUP; VCL; CTNNB1; PXN; BCAR1; PKD1; PTK2; TLN1)	DIV5.DIV1	TRUE	rnorvegicus
0.937	2.82403	1.14593	CTNNB1	-0.782163	Polycystin-1 multiprotein complex (ACTN1; CDH1; SRC; JUP; VCL; CTNNB1; PXN; BCAR1; PKD1; PTK2; TLN1)	Neu.IPS	TRUE	hsapiens
0.937	2.28625	3.40088	RPL21	2.27195	cytoplasmic ribosomal large subunit	Neu.NPC	FALSE	hsapiens
0.937	1.311	1.54126	MRE11A	0.673	CF IIAm complex (Cleavage factor IIAm complex)	DIV14.DIV5	FALSE	rnorvegicus
0.936	2.79956	1.13104	JUP	-0.812747	Polycystin-1 multiprotein complex (ACTN1; CDH1; SRC; JUP; VCL; CTNNB1; PXN; BCAR1; PKD1; PTK2; TLN1)	Neu.IPS	TRUE	hsapiens
0.936	3.45764	4.52025	RPL21	2.39844	cytoplasmic ribosomal large subunit	Neu.IPS	FALSE	hsapiens
0.936	2.26404	-1.58475	ACTG1	-2.42142	P2X7 receptor signalling complex	Neu.NPC	TRUE	hsapiens
0.936	1.15851	-1.71013	UBQLN2	-0.213288	H+transporting ATPase; vacuolar	DIV5.DIV1	TRUE	rnorvegicus
0.935	3.05962	-1.24153	ACTN1	-5.6852	Polycystin-1 multiprotein complex (ACTN1; CDH1; SRC; JUP; VCL; CTNNB1; PXN; BCAR1; PKD1; PTK2; TLN1)	Neu.IPS	TRUE	hsapiens
0.935	2.13391	1.51677	MSI1	4.61483	mRNA cleavage factor complex (CFI)	Neur.Stem	TRUE	drerio
0.934	2.08062	-2.64699	NUP37	-2.17231	Nuclear pore complex (NPC)	NPC.iPS	FALSE	hsapiens
0.934	2.3419	-1.18941	SNAP23	-0.465476	SNARE complex	D10.D0	TRUE	mmusculus
0.934	1.39907	-2.16416	KMT2B	-2.27217	KMT2C/D containing complex	D10.D3	TRUE	mmusculus
0.933	2.05712	1.66684	MSI1	2.11986	mRNA cleavage factor complex (CFI)	NPC.iPS	TRUE	hsapiens
0.933	2.09982	-2.13876	PDRG1	-1.49803	Kinase maturation complex 1	Neu.NPC	FALSE	hsapiens
0.933	1.02869	1.42289	ACTL6B	0.478853	INO80.com	DIV5.DIV1	TRUE	rnorvegicus
0.933	1.41204	-2.37186	KIN	-1.37773	Spliceosome-B	D3.D0	FALSE	mmusculus
0.932	3.18285	-2.58846	EEF1A1	-3.76127	mitochondrial ribosomal large subunit	Neu.IPS	TRUE	hsapiens
0.932	2.1433	1.29955	TUBB4A	2.62874	Tubulins	Neu.NPC	TRUE	hsapiens
0.932	1.80662	-1.47226	TAF1	-0.40679	TAF complex	Neur.Stem	FALSE	drerio
0.931	2.31185	-1.36857	TUBB6	-1.27694	Tubulins	Neu.NPC	TRUE	hsapiens
0.931	2.36033	1.95995	HSPA2	1.68922	RSC	D10.D0	TRUE	mmusculus
0.931	1.33449	-0.912256	MCM6	-2.08409	emerin C24	D3.D0	TRUE	mmusculus
0.93	1.86769	1.72356	SRP54	1.59804	Signal recognition particle (SRP) complex	NPC.iPS	TRUE	hsapiens
0.93	1.39562	1.50457	AK6	0.339062	TAF complex	D10.D3	TRUE	mmusculus
0.93	1.46816	-3.47658	RPL37	-1.75905	cytoplasmic ribosomal large subunit	D10.D3	FALSE	mmusculus
0.93	1.28995	-0.847739	MCM2	-2.00544	emerin C24	D3.D0	TRUE	mmusculus
0.929	1.42561	2.29647	ATP6V1G2	1.96101	H+transporting ATPase; vacuolar	D3.D0	TRUE	mmusculus
0.929	1.2918	-1.7018	NELFCD	-0.846967	Dsl1p complex	D3.D0	FALSE	mmusculus
0.929	1.28995	0.411175	SAP130	-0.47077	emerin C24	D3.D0	FALSE	mmusculus
0.928	2.05358	1.5219	DNMT3B	0.806363	DNMT3B	Neu.NPC	TRUE	hsapiens
0.928	1.19337	1.062	BRK1	1.49715	Wave-2 complex	D10.D3	FALSE	mmusculus
0.928	1.41462	-1.66789	LLGL1	-1.10916	Sro1p/Sec4p/Sec9p complex	D3.D0	TRUE	mmusculus
0.927	2.12657	-1.18753	DDX3XB	0.563744	Large Drosha complex	Neur.Stem	TRUE	drerio
0.927	1.73075	1.73942	RFC2	0.184471	RC complex during S-phase of cell cycle	DIV14.DIV1	TRUE	rnorvegicus
0.927	2.22958	2.23936	TAF9B	0.670188	TAF complex	D10.D0	TRUE	mmusculus
0.927	1.33041	-1.84	PRKX	-0.326679	cAMP-dependent protein kinase	D10.D3	TRUE	mmusculus
0.926	1.27675	1.32758	SLC27A1	1.633	Fatty Acid Import Complex	DIV14.DIV5	TRUE	rnorvegicus
0.926	1.318	-1.78677	PXN	-0.884	Polycystin-1 multiprotein complex (ACTN1; CDH1; SRC; JUP; VCL; CTNNB1; PXN; BCAR1; PKD1; PTK2; TLN1)	DIV14.DIV5	TRUE	rnorvegicus
0.926	1.04986	2.10675	TUBB2A	1.39165	Tubulins	DIV5.DIV1	TRUE	rnorvegicus
0.925	2.21833	1.77112	YWHAQ	1.33589	emerin C52	Neu.NPC	TRUE	hsapiens
0.925	2.10734	1.383	VPS35	2.3445	retromer complex	Neu.NPC	FALSE	hsapiens
0.925	1.98895	-1.16405	ACTR1	-0.0306487	RSC	Neur.Stem	TRUE	drerio
0.925	0.991491	0.704894	CDC42	1.68067	Cdc42p/Ste20p complex	DIV5.DIV1	TRUE	rnorvegicus
0.925	1.99902	1.67756	PRKAB2	1.92738	Snf1p/Snf4p/Sip2p complex	D10.D0	TRUE	mmusculus
0.925	2.16802	-1.07166	STX4A	-0.262619	SNARE complex	D10.D0	TRUE	mmusculus
0.925	1.41116	1.8273	COMMD3	0.536831	Polycomb-group repressive complex 1 (PRC1)	D10.D3	FALSE	mmusculus
0.924	1.85487	-1.35531	PLRG1	-1.32489	Spliceosome-Prp19	NPC.iPS	FALSE	hsapiens
0.924	1.91832	1.81962	TUBB2A	2.70546	Tubulins	NPC.iPS	TRUE	hsapiens
0.924	0.973702	-1.24634	WDR47	0.224176	heterotrimeric G-protein complex	DIV5.DIV1	FALSE	rnorvegicus
0.924	0.979231	-1.54264	PRKAR1A	-0.148118	cAMP-dependent protein kinase	DIV5.DIV1	TRUE	rnorvegicus
0.924	1.28147	0.893729	VAMP2	1.78828	SNARE complex	D3.D0	TRUE	mmusculus
0.923	1.85692	-1.15954	HDAC2	-1.12849	CtBP	NPC.iPS	TRUE	hsapiens
0.923	2.13298	-1.46243	ACTN4	-2.26852	P2X7 receptor signalling complex	Neu.NPC	TRUE	hsapiens
0.923	2.00341	0.985696	ACTG1	0.965732	Emerin regulatory complex	D10.D0	TRUE	mmusculus
0.922	1.88455	2.02396	MAGT1	1.55634	oligosaccharyl transferase complex	NPC.iPS	TRUE	hsapiens
0.922	2.06471	1.66248	POLR2I	1.57701	RNA polymerase II core complex	Neu.NPC	TRUE	hsapiens
0.922	1.24078	1.93044	GSPT2	1.38348	SMG-1-Upf1-eRF1-eRF3 complex (SURF)	D10.D3	TRUE	mmusculus
0.922	1.35264	1.59482	SNAP25	1.3122	Sro1p/Sec4p/Sec9p complex	D3.D0	TRUE	mmusculus
0.921	1.74029	0.419303	SMC4	-0.198047	DNMT3B	NPC.iPS	TRUE	hsapiens
0.921	1.27722	-2.20197	GNAI3	-0.465	heterotrimeric G-protein complex	DIV14.DIV5	TRUE	rnorvegicus
0.921	0.987665	0.119224	ACSL3	1.17969	Fatty Acid Import Complex	DIV5.DIV1	TRUE	rnorvegicus
0.921	2.05214	-1.12371	HMGB2	-2.852	HMGB1-HMGB2-HSC70-ERP60-GAPDH complex	D10.D0	TRUE	mmusculus
0.921	1.40404	1.18448	EIF3J1	1.03183	eIF3	D10.D3	TRUE	mmusculus
0.921	1.30833	-0.885431	MCM4	-2.05139	emerin C24	D3.D0	TRUE	mmusculus
0.92	2.11744	-0.283252	EEF1D	-1.40601	eEF1	Neu.NPC	TRUE	hsapiens
0.92	1.81262	-1.58775	PHAX	-0.178355	CRM1-RAN-PHAX-CBC complex (cap binding complex)	Neur.Stem	FALSE	drerio
0.92	1.28451	-1.76956	DEK	-1.44498	B-WICH	D3.D0	FALSE	mmusculus
0.919	1.90818	-0.649918	PRMT5	0.238909	FIB-associated protein complex	Neur.Stem	FALSE	drerio
0.919	1.67852	1.64488	ACSL4	3.04361	Fatty Acid Import Complex	DIV14.DIV1	TRUE	rnorvegicus
0.919	1.79599	2.23654	CLUH	1.22348	eIF3	DIV14.DIV1	FALSE	rnorvegicus
0.919	1.92367	-1.47633	CNN3	-1.51799	emerin	D10.D0	TRUE	mmusculus
0.919	2.21043	-2.19719	PDCD4	-2.91506	emerin C52	D10.D0	FALSE	mmusculus
0.919	1.38265	2.51699	ACTG1	0.473211	BAF complex	D10.D3	TRUE	mmusculus
0.919	1.34869	-1.80546	SEC23B	-1.25669	COPII	D3.D0	TRUE	mmusculus
0.918	1.85217	1.15658	CTBP1	1.83878	CtBP	NPC.iPS	TRUE	hsapiens
0.918	2.11744	0.106095	EEF1B2	-0.42922	eEF1	Neu.NPC	TRUE	hsapiens
0.918	1.98728	2.53608	HNRNPK	3.05111	emerin C25	Neur.Stem	TRUE	drerio
0.918	1.69979	-1.65865	RPRD1B	-2.15868	RNA Degradation Complex	DIV14.DIV1	TRUE	rnorvegicus
0.918	0.897989	-0.213038	SLC27A4	0.820991	Fatty Acid Import Complex	DIV5.DIV1	TRUE	rnorvegicus
0.918	1.26503	-1.53234	XRCC5	-1.69796	DNA-PK-Ku-eIF2-NF90-NF45 complex	D3.D0	TRUE	mmusculus
0.917	1.83335	-0.581841	CCNB1	-0.871207	RalBP1-CCNB1-AP2A-NUMB-EPN1 complex	NPC.iPS	TRUE	hsapiens
0.917	1.74082	0.463998	SIN3A	-0.0638967	DNMT3B	NPC.iPS	TRUE	hsapiens
0.917	2.07522	1.67004	CTNNB1	0.585899	TCF4-CTNNB1-SUMO1-EP300-HADAC6 complex	D10.D0	TRUE	mmusculus
0.917	2.08987	-0.992274	VAMP3	-0.125849	SNARE complex	D10.D0	TRUE	mmusculus
0.916	1.93772	0.528713	HNRNPUB	3.20254	emerin C24	Neur.Stem	TRUE	drerio
0.916	1.85823	-0.647688	MCM4	0.961253	emerin C24	Neur.Stem	TRUE	drerio
0.916	1.35467	1.87372	TJP1	0.581239	CF IIAm complex (Cleavage factor IIAm complex)	D10.D3	TRUE	mmusculus
0.915	1.83446	0.0703633	EPN1	0.47817	RalBP1-CCNB1-AP2A-NUMB-EPN1 complex	NPC.iPS	TRUE	hsapiens
0.915	1.93919	1.2285	VPS29	2.14273	retromer complex	Neu.NPC	FALSE	hsapiens
0.915	1.86321	0.450499	HNRNPUA	3.05353	emerin C24	Neur.Stem	TRUE	drerio
0.915	1.365	0.955612	TUBB2A	1.361	Tubulins	DIV14.DIV5	TRUE	rnorvegicus
0.915	1.26621	1.31552	PIN1	1.27097	RAF1-PPP2-PIN1 complex	D10.D3	TRUE	mmusculus
0.914	1.71879	0.447957	SMC2	-0.112043	DNMT3B	NPC.iPS	TRUE	hsapiens
0.914	1.94227	-1.04846	ACTG1	-2.42142	emerin	Neu.NPC	TRUE	hsapiens
0.914	2.06355	-1.9638	ACTG1	-2.42142	BAF complex	Neu.NPC	TRUE	hsapiens
0.913	1.32379	-2.04131	CBX2	-1.46654	Polycomb-group repressive complex 1 (PRC1)	D3.D0	TRUE	mmusculus
0.913	1.3406	-0.82035	VAMP3	-0.141437	SNARE complex	D3.D0	TRUE	mmusculus
0.912	1.72583	0.457337	SMARCA5	-0.08389	DNMT3B	NPC.iPS	TRUE	hsapiens
0.912	1.192	-1.23945	ACSL3	-0.342	Fatty Acid Import Complex	DIV14.DIV5	TRUE	rnorvegicus
0.912	1.2732	1.90592	RCOR3	0.274317	COREST complex	D10.D3	TRUE	mmusculus
0.911	1.21983	1.8289	TNKS1BP1	0.674	CCR4-NOT complex	DIV14.DIV5	TRUE	rnorvegicus
0.911	1.0647	-1.72042	ACTL6A	-1.07386	RSC	DIV5.DIV1	TRUE	rnorvegicus
0.911	1.96838	-1.61173	PRKX	-0.597469	cAMP-dependent protein kinase	D10.D0	TRUE	mmusculus
0.91	1.71928	-1.47269	MTA3	-1.42544	NuRD complex	NPC.iPS	TRUE	hsapiens
0.91	1.76674	-1.78067	POLD1	-2.3591	RC complex during S-phase of cell cycle	NPC.iPS	TRUE	hsapiens
0.91	1.91634	-1.66011	EIF4G1	-1.31898	eIF4F	Neu.NPC	TRUE	hsapiens
0.91	2.15167	-1.85772	CBX2	-2.94485	Polycomb-group repressive complex 1 (PRC1)	D10.D0	TRUE	mmusculus
0.909	1.90451	1.76857	EEF1A2	1.72512	eEF1	NPC.iPS	TRUE	hsapiens
0.909	1.04289	-2.57071	MSI1	-1.63765	mRNA cleavage factor complex (CFI)	DIV5.DIV1	TRUE	rnorvegicus
0.909	1.3728	1.94502	YWHAB	0.900399	emerin C25	D10.D3	TRUE	mmusculus
0.908	1.70742	1.22776	DEK	0.745153	B-WICH	NPC.iPS	FALSE	hsapiens
0.908	1.90927	-1.5268	HMGB2	-1.9054	HMGB1-HMGB2-HSC70-ERP60-GAPDH complex	Neu.NPC	TRUE	hsapiens
0.908	1.82946	-1.75779	ACTL6A	-1.88504	RSC	DIV14.DIV1	TRUE	rnorvegicus
0.907	1.27001	1.88189	NOTCH1	0.268188	HES1 promoter-Notch enhancer complex	D10.D3	TRUE	mmusculus
0.907	1.14402	-1.58963	DYNLL1	-0.789214	cytoplasmic dynein complex	D10.D3	TRUE	mmusculus
0.907	1.20031	-1.37101	EHMT2	-1.9414	E2F6.com-1	D10.D3	TRUE	mmusculus
0.906	1.72622	1.02228	ACTB	0.98403	Emerin regulatory complex	Neu.NPC	TRUE	hsapiens
0.905	1.80865	0.982199	ACTB	0.49459	emerin	Neu.NPC	TRUE	hsapiens
0.905	1.66498	-1.10106	CCNB1	-1.26993	Cdc28p/Clb5p complex	Neur.Stem	TRUE	drerio
0.905	0.946993	1.21215	GNB4	1.76073	heterotrimeric G-protein complex	DIV5.DIV1	TRUE	rnorvegicus
0.905	1.93051	-1.01271	HMGB1	-2.68983	HMGB1-HMGB2-HSC70-ERP60-GAPDH complex	D10.D0	TRUE	mmusculus
0.905	1.23287	1.75546	UCHL5	0.241068	INO80 complex	D10.D3	TRUE	mmusculus
0.905	1.33566	2.31536	ACTL6B	1.1939	BAF complex	D3.D0	TRUE	mmusculus
0.904	2.59899	-1.97545	DDX21	-3.20445	Toposome	Neu.IPS	TRUE	hsapiens
0.904	1.72548	-1.3934	SUPT7L	-0.487945	STAGA complex	Neur.Stem	FALSE	drerio
0.904	0.952859	1.47516	RFC2	0.0641931	RC complex during S-phase of cell cycle	DIV5.DIV1	TRUE	rnorvegicus
0.903	1.1305	-0.428868	TUBG2	-0.442	60S APC containing complex	DIV14.DIV5	TRUE	rnorvegicus
0.903	0.96487	2.17058	MRPS16	1.24641	mitochondrial ribosomal small subunit	DIV5.DIV1	FALSE	rnorvegicus
0.903	1.2891	-1.12301	SAFB2	-1.25209	eIF3	D10.D3	TRUE	mmusculus
0.903	1.19326	-1.57856	H2AFX	-2.66488	Nucleosomal protein complex	D10.D3	FALSE	mmusculus
0.902	2.50689	1.69123	TUBA1B	1.74562	FIB-associated protein complex	Neu.IPS	TRUE	hsapiens
0.902	2.0405	-2.26798	ATPIF1	-0.68108	F0/F1 ATP synthase (complex V)	Neu.NPC	FALSE	hsapiens
0.902	1.87213	-1.52093	CDC5L	-1.72057	Spliceosome-Prp19	Neu.NPC	TRUE	hsapiens
0.901	1.71417	-1.2129	CSTF3	-1.11106	mRNA cleavage factor complex (CFI)	NPC.iPS	FALSE	hsapiens
0.901	1.67535	-1.73485	PWP2	-1.99618	UTP B complex	NPC.iPS	TRUE	hsapiens
0.901	1.90394	-0.877393	CKBB	0.296663	emerin C52	Neur.Stem	TRUE	drerio
0.901	1.89708	1.82276	HSPA2	1.57531	RSC	DIV14.DIV1	TRUE	rnorvegicus
0.901	1.1904	1.50688	MRPL45	0.783	smc5p-Smc6p complex	DIV14.DIV5	FALSE	rnorvegicus
0.901	1.36143	1.88611	CKB	0.811732	emerin C52	D10.D3	TRUE	mmusculus
0.901	1.27094	1.91519	NAA38	0.292323	Spliceosome-LSm	D10.D3	FALSE	mmusculus
0.901	1.31505	-2.56052	ARPC1B	-0.982923	Arp2/3 protein complex	D3.D0	TRUE	mmusculus
0.9	1.71579	-1.17582	POLR2H	-1.37049	RNA polymerase II core complex	NPC.iPS	FALSE	hsapiens
0.9	1.12365	-1.58043	SHROOM2	0.121421	SPB components	D3.D0	TRUE	mmusculus
0.899	1.70936	-1.68298	MT-CO2	-1.98	Cytochrome c oxidase (complex IV)	NPC.iPS	FALSE	hsapiens
0.899	1.69162	1.86198	YWHAB	1.04985	emerin C25	DIV14.DIV1	TRUE	rnorvegicus
0.899	2.00796	0.877908	VAMP2	3.09618	SNARE complex	D10.D0	TRUE	mmusculus
0.899	1.22221	1.4072	PDE6D	0.865888	smc5p-Smc6p complex	D10.D3	FALSE	mmusculus
0.898	2.44106	-0.214151	EEF1D	-1.25075	eEF1	Neu.IPS	TRUE	hsapiens
0.898	1.82329	1.94605	HDAC2	0.7011	NuRD complex	Neu.NPC	TRUE	hsapiens
0.898	1.93308	1.48355	SPTAN1	1.78779	emerin	D10.D0	TRUE	mmusculus
0.898	1.99906	1.8349	JUP	1.64286	Polycystin-1 multiprotein complex (ACTN1; CDH1; SRC; JUP; VCL; CTNNB1; PXN; BCAR1; PKD1; PTK2; TLN1)	D10.D0	TRUE	mmusculus
0.898	1.24286	1.72923	ACTC1	0.647627	INO80.com	D10.D3	TRUE	mmusculus
0.898	1.26839	1.47473	STRAP	0.361493	Survival of motor neuron (SMN) complex	D10.D3	FALSE	mmusculus
0.897	1.88801	-1.08695	GNB4	-0.50824	heterotrimeric G-protein complex	Neu.NPC	TRUE	hsapiens
0.897	1.95147	0.99917	HNRNPL	3.40054	emerin C52	Neur.Stem	TRUE	drerio
0.897	1.80625	-0.448133	PRMT1	0.646624	FIB-associated protein complex	Neur.Stem	TRUE	drerio
0.897	1.24735	-2.22642	FLNA	-1.51514	COMPASS complex	D3.D0	TRUE	mmusculus
0.897	1.27773	-2.30953	SP1	-1.75414	HCF-1N	D3.D0	TRUE	mmusculus
0.896	1.80202	-1.31903	CLP1	1.0635	mRNA cleavage factor complex (CFI)	Neur.Stem	TRUE	drerio
0.896	1.6353	-0.699407	FBL	-0.638712	FIB-associated protein complex	DIV14.DIV1	TRUE	rnorvegicus
0.896	1.27526	1.74305	TUBA4A	2.42748	Tubulins	D10.D3	TRUE	mmusculus
0.895	1.8476	0.804423	PPP1CA	0.164875	HDAC1-PP1	D10.D0	TRUE	mmusculus
0.895	1.2087	1.36272	RCOR3	0.274317	CtBP	D10.D3	TRUE	mmusculus
0.894	1.67606	-0.831301	RAB8A	-1.12594	Sro1p/Sec4p/Sec9p complex	Neu.NPC	TRUE	hsapiens
0.894	1.18508	1.68244	CLIP3	1.27017	dynactin complex	D3.D0	TRUE	mmusculus
0.894	1.27593	-1.4236	HDGF	-1.45475	emerin C52	D3.D0	TRUE	mmusculus
0.893	2.49878	0.0279247	EEF1B2	-0.46695	eEF1	Neu.IPS	TRUE	hsapiens
0.893	1.81881	-0.302289	VCL	-3.09603	Polycystin-1 multiprotein complex (ACTN1; CDH1; SRC; JUP; VCL; CTNNB1; PXN; BCAR1; PKD1; PTK2; TLN1)	Neu.NPC	TRUE	hsapiens
0.893	1.77929	-1.49096	ZNF217	0.0980152	CtBP	Neur.Stem	TRUE	drerio
0.892	1.66523	-0.256809	AP2A1	-0.198733	RalBP1-CCNB1-AP2A-NUMB-EPN1 complex	NPC.iPS	TRUE	hsapiens
0.892	1.69232	-1.2169	MYBBP1A	-2.08796	B-WICH	NPC.iPS	FALSE	hsapiens
0.892	1.69513	1.9359	SLTM	1.48108	eIF3	NPC.iPS	TRUE	hsapiens
0.892	1.86173	2.73526	RPL27	1.83596	cytoplasmic ribosomal large subunit	Neu.NPC	FALSE	hsapiens
0.892	1.79917	0.879465	HNRNPUB	3.20254	emerin C52	Neur.Stem	TRUE	drerio
0.892	1.26394	-1.45526	NSMCE2	-1.34402	smc5p-Smc6p complex	D10.D3	FALSE	mmusculus
0.891	1.84182	-1.08919	GEMIN2	-0.914412	SMN-PolII-RHA complex	Neur.Stem	FALSE	drerio
0.891	0.881318	-1.19686	XRCC5	-0.960272	DNA-PK-Ku-eIF2-NF90-NF45 complex	DIV5.DIV1	TRUE	rnorvegicus
0.891	1.8191	0.834559	ACTB	0.719985	Emerin regulatory complex	D10.D0	TRUE	mmusculus
0.891	1.31769	-1.82256	U2AF1	-1.86843	CF IIAm complex (Cleavage factor IIAm complex)	D10.D3	TRUE	mmusculus
0.891	1.22859	-1.38515	EHMT2	-1.9414	CtBP	D10.D3	TRUE	mmusculus
0.891	1.19757	-1.82189	ACTL6A	-0.998055	INO80.com	D3.D0	TRUE	mmusculus
0.89	1.70992	1.27373	POLR2I	1.44814	RNA polymerase II core complex	NPC.iPS	TRUE	hsapiens
0.89	2.44106	-0.0166419	EEF1G	-0.61125	eEF1	Neu.IPS	TRUE	hsapiens
0.89	1.78865	-1.04517	DDX20	-0.850611	SMN-PolII-RHA complex	Neur.Stem	TRUE	drerio
0.89	1.60667	1.75323	PI4KA	1.92816	P2X7 receptor signalling complex	DIV14.DIV1	TRUE	rnorvegicus
0.89	1.34653	-2.10577	FBL	-1.52401	TNF-alpha/NF-kappa B signaling complex 6	D10.D3	TRUE	mmusculus
0.89	1.13405	-1.36505	CDKN1B	-1.24587	p27-cyclinE-Cdk2 - Ubiquitin E3 ligase (SKP1A; SKP2; CUL1; CKS1B; RBX1) complex	D10.D3	TRUE	mmusculus
0.89	1.23271	-1.04162	SAFB	-1.17153	eIF3	D10.D3	TRUE	mmusculus
0.89	1.20146	1.41357	ERC2	1.7844	SPB components	D10.D3	TRUE	mmusculus
0.89	1.09887	-1.01683	HMGB2	-1.85275	HMGB1-HMGB2-HSC70-ERP60-GAPDH complex	D3.D0	TRUE	mmusculus
0.889	1.75724	-1.19334	UBQLN2	0.314987	H+transporting ATPase; vacuolar	Neu.NPC	TRUE	hsapiens
0.889	1.82893	-0.616935	MCM2	1.01984	emerin C24	Neur.Stem	TRUE	drerio
0.889	1.09865	-0.0104206	EMD	-0.813065	Emerin regulatory complex	D10.D3	FALSE	mmusculus
0.888	1.79736	1.86991	HSPB1	1.77804	Spliceosome-B	Neu.NPC	TRUE	hsapiens
0.888	1.7541	-0.765867	DHX15	1.20226	Large Drosha complex	Neur.Stem	TRUE	drerio
0.888	1.53514	1.34485	CDC42	2.32787	Cdc42p/Ste20p complex	DIV14.DIV1	TRUE	rnorvegicus
0.888	1.19289	-2.59371	SF3B5	-2.028	Spliceosome-U2	DIV14.DIV5	FALSE	rnorvegicus
0.888	0.909689	-0.68547	PAK3	0.513379	Cdc42p/Ste20p complex	DIV5.DIV1	TRUE	rnorvegicus
0.888	1.94573	-1.27943	LLGL1	-1.32366	Sro1p/Sec4p/Sec9p complex	D10.D0	TRUE	mmusculus
0.888	1.16094	0.74142	PPP1CA	0.0809182	HDAC1-PP1	D10.D3	TRUE	mmusculus
0.887	1.64138	-0.935221	CTBP2	-0.841103	CtBP	NPC.iPS	TRUE	hsapiens
0.887	2.18646	-1.40531	ACTG1	-1.7031	Emerin regulatory complex	Neu.IPS	TRUE	hsapiens
0.887	1.82194	0.997656	PDIA3	0.247271	HMGB1-HMGB2-HSC70-ERP60-GAPDH complex	D10.D0	TRUE	mmusculus
0.887	1.21375	1.38636	TFDP1	0.12779	E2F6.com-1	D10.D3	TRUE	mmusculus
0.886	1.09917	1.14529	PPP3CC	1.37215	calcineurin complex	D3.D0	TRUE	mmusculus
0.885	1.70747	0.789372	HNRNPUA	3.05353	emerin C52	Neur.Stem	TRUE	drerio
0.884	1.81881	0.220951	PXN	-2.1271	Polycystin-1 multiprotein complex (ACTN1; CDH1; SRC; JUP; VCL; CTNNB1; PXN; BCAR1; PKD1; PTK2; TLN1)	Neu.NPC	TRUE	hsapiens
0.884	1.76295	1.53996	ERH	2.33208	Flag-FCP1	Neur.Stem	FALSE	drerio
0.884	1.76781	-0.744791	WASF2	-0.592039	Wave-2 complex	D10.D0	TRUE	mmusculus
0.884	1.79013	-0.512612	HIST1H1A	-1.47049	Emerin regulatory complex	D10.D0	FALSE	mmusculus
0.883	1.65481	2.77918	MRPL4	1.96923	mitochondrial ribosomal large subunit	DIV14.DIV1	FALSE	rnorvegicus
0.883	1.58749	-1.4126	WDR47	0.50621	heterotrimeric G-protein complex	DIV14.DIV1	FALSE	rnorvegicus
0.883	1.21359	1.84626	ACTL6B	1.1939	INO80.com	D3.D0	TRUE	mmusculus
0.883	1.08976	1.221	SMARCA1	0.461448	ISW1b complex	D3.D0	TRUE	mmusculus
0.882	2.32812	1.92725	ACTB	1.54803	BAF complex	Neu.IPS	TRUE	hsapiens
0.882	1.74906	1.93187	DAD1	1.88017	oligosaccharyl transferase complex	Neu.NPC	FALSE	hsapiens
0.882	1.86876	1.6382	MRPL1	1.61182	mitochondrial ribosomal large subunit	Neu.NPC	FALSE	hsapiens
0.882	1.65473	-0.545079	MCM5	0.818605	MCM complex	Neur.Stem	TRUE	drerio
0.882	1.54672	-1.59093	PRKAR1A	-0.0424985	cAMP-dependent protein kinase	DIV14.DIV1	TRUE	rnorvegicus
0.881	1.25881	3.30493	RPS5	0.969	cytoplasmic ribosomal small subunit	DIV14.DIV5	TRUE	rnorvegicus
0.881	1.16171	-2.05489	POLR2D	-1.832	RNA polymerase II core complex	DIV14.DIV5	FALSE	rnorvegicus
0.881	0.9122	-1.26176	ACTL6A	-1.07386	INO80.com	DIV5.DIV1	TRUE	rnorvegicus
0.881	1.2561	0.970949	EIF3J2	0.820483	eIF3	D10.D3	TRUE	mmusculus
0.881	1.26052	-1.75873	NASP	-1.87781	H3.3 com	D3.D0	FALSE	mmusculus
0.88	1.16541	-1.61039	GNAI2	0.13521	heterotrimeric G-protein complex	D3.D0	TRUE	mmusculus
0.879	1.6097	-1.74427	ING2	0.400101	SIN3 complex	Neur.Stem	TRUE	drerio
0.878	1.55552	1.70114	DDX23	1.57587	Spliceosome-U5	NPC.iPS	TRUE	hsapiens
0.878	1.75882	-1.02235	PARP1	-1.79051	Rap1 complex	Neu.NPC	TRUE	hsapiens
0.878	1.79596	-1.27197	POLD1	-1.87692	RC complex during S-phase of cell cycle	Neu.NPC	TRUE	hsapiens
0.878	1.0865	0.00210968	APC	0.13	60S APC containing complex	DIV14.DIV5	TRUE	rnorvegicus
0.878	0.906042	2.12598	YWHAH	1.03892	Kinase maturation complex 1	DIV5.DIV1	TRUE	rnorvegicus
0.878	1.20877	-1.88112	RELA	-1.21987	TNF-alpha/NF-kappa B signaling complex (CHUK; BTRC; NFKB2; PPP6C; REL; CUL1; IKBKE; SAPS2; SAPS1; ANKRD28; RELA; SKP1)	D10.D3	TRUE	mmusculus
0.877	1.55335	1.74448	TERF2IP	1.4085	Rap1 complex	NPC.iPS	FALSE	hsapiens
0.876	1.63851	-0.838008	GEMIN4	-0.550338	SMN-PolII-RHA complex	Neur.Stem	FALSE	drerio
0.876	1.61552	-2.27092	RPS15	-0.792321	mitochondrial ribosomal small subunit	DIV14.DIV1	TRUE	rnorvegicus
0.876	1.20468	-1.68366	HDAC1	-1.70856	HCF-1N	D10.D3	TRUE	mmusculus
0.875	1.2424	1.84595	AK6	0.339062	STAGA complex	D10.D3	TRUE	mmusculus
0.874	2.35925	-1.41584	MCM4	-3.64971	emerin C24	Neu.IPS	TRUE	hsapiens
0.874	1.93441	1.9452	RCOR3	0.441462	CtBP	D10.D0	TRUE	mmusculus
0.874	1.12843	-2.03542	ZMAT2	-2.25264	Spliceosome-B	D10.D3	TRUE	mmusculus
0.873	1.55643	1.33961	RBBP4	0.858387	H3.3 com	NPC.iPS	TRUE	hsapiens
0.873	2.32436	2.01923	CLU	1.54531	eIF3	Neu.IPS	TRUE	hsapiens
0.873	2.34232	3.31336	PSMD10	1.97833	26S Proteasome	Neu.IPS	TRUE	hsapiens
0.873	1.72028	1.63712	ACTB	0.98403	BAF complex	Neu.NPC	TRUE	hsapiens
0.872	1.63672	-1.15694	DDX21	-2.01847	B-WICH	NPC.iPS	TRUE	hsapiens
0.872	2.24334	2.20502	DPY30	1.4671	emerin C32	Neu.IPS	FALSE	hsapiens
0.872	1.20091	1.35199	ZEB1	0.265666	CtBP	D10.D3	TRUE	mmusculus
0.872	1.11452	-1.3213	PPP2CA	-1.07675	protein phosphatase type 2A complex (Rts1p)	D10.D3	TRUE	mmusculus
0.871	1.52303	-1.44467	HDAC2	-1.12849	ELL.com	NPC.iPS	TRUE	hsapiens
0.871	1.63147	1.72208	DRAP1	0.948453	RNA polymerase II complex; chromatin structure modifying	Neu.NPC	TRUE	hsapiens
0.87	2.24487	-1.571	DDX21	-3.20445	B-WICH	Neu.IPS	TRUE	hsapiens
0.87	1.0855	-1.18014	PARP1	-1.242	Rap1 complex	DIV14.DIV5	TRUE	rnorvegicus
0.87	1.18461	1.17802	CAPZB	0.597683	RICH1/AMOT polarity complex; Flag-Rich1 precipitated	D3.D0	FALSE	mmusculus
0.87	1.27026	0.937949	SLTM	0.773644	eIF3	D3.D0	TRUE	mmusculus
0.869	1.5116	1.4188	EIF4A3	2.05631	eIF4F	Neur.Stem	TRUE	drerio
0.869	1.068	-0.658203	WASF2	-0.0492521	Wave-2 complex	D10.D3	TRUE	mmusculus
0.869	1.17949	1.37646	SNAP25	1.28227	Sro1p/Sec4p/Sec9p complex	D10.D3	TRUE	mmusculus
0.868	1.56518	1.17274	TP53BP1	1.36539	53BP1-containing complex	Neu.NPC	FALSE	hsapiens
0.868	1.94539	-1.86856	HDAC1	-2.967	HCF-1N	D10.D0	TRUE	mmusculus
0.868	1.16993	1.59403	STX1A	1.82526	SNARE complex	D10.D3	TRUE	mmusculus
0.867	1.72395	-1.20057	PARP1	-1.79051	RC complex during S-phase of cell cycle	Neu.NPC	TRUE	hsapiens
0.867	1.15146	-2.13294	UBQLN2	-0.125	H+transporting ATPase; vacuolar	DIV14.DIV5	TRUE	rnorvegicus
0.867	1.036	-1.3987	NOL6	-1.061	UTP C complex	DIV14.DIV5	FALSE	rnorvegicus
0.867	1.08858	-0.87986	CD2AP	-1.17609	RICH1/AMOT polarity complex; Flag-Rich1 precipitated	D3.D0	TRUE	mmusculus
0.866	1.63106	1.03097	TUBB2B	1.10503	Profilin 1 complex	Neu.NPC	TRUE	hsapiens
0.866	1.67107	-1.23842	SMC4	-2.17336	DNMT3B	Neu.NPC	TRUE	hsapiens
0.866	1.53099	1.04997	DDX21	2.97627	Toposome	Neur.Stem	TRUE	drerio
0.866	1.037	-0.147075	TUBA1A	-0.068	60S APC containing complex	DIV14.DIV5	TRUE	rnorvegicus
0.866	1.11335	-1.6888	ATF7IP	-1.22817	Suv39h1	D3.D0	TRUE	mmusculus
0.865	1.57964	-1.74162	COPA	-1.59711	COPI	NPC.iPS	TRUE	hsapiens
0.865	1.54068	1.63166	PFDN2	1.30444	PFD-like	NPC.iPS	FALSE	hsapiens
0.865	1.53967	1.56696	RAB8B	1.56227	Sro1p/Sec4p/Sec9p complex	NPC.iPS	TRUE	hsapiens
0.865	1.72172	1.49749	PRKDC	0.739913	H3.3 com	Neu.NPC	TRUE	hsapiens
0.865	1.07774	-1.38941	CDK17	-0.510148	Pho85p/Pcl1p complex	D10.D3	TRUE	mmusculus
0.865	1.11176	0.629925	STX1B	1.49129	SNARE complex	D3.D0	TRUE	mmusculus
0.864	1.70635	0.787911	HNRNPK	3.05111	emerin C52	Neur.Stem	TRUE	drerio
0.863	1.71759	-1.26098	TJP1	-2.06328	CF IIAm complex (Cleavage factor IIAm complex)	Neu.NPC	TRUE	hsapiens
0.863	1.58152	-1.1965	RBBP4	-1.78285	ELL.com	Neu.NPC	TRUE	hsapiens
0.863	0.903375	1.95102	ACTL6B	0.478853	BAF complex	DIV5.DIV1	TRUE	rnorvegicus
0.863	1.77404	2.27989	HSPA2	1.68922	HMC Complex	D10.D0	TRUE	mmusculus
0.863	1.12912	1.34259	TLE3	-0.00246492	NK-3-Groucho-HIPK2-SIN3A-RbpA48-HDAC1 complex	D10.D3	TRUE	mmusculus
0.862	1.69052	-1.41642	IPO4	-0.76004	H3.3 com	Neur.Stem	TRUE	drerio
0.862	1.6766	-0.137201	SAP130B	1.93384	emerin C24	Neur.Stem	TRUE	drerio
0.862	0.857462	-1.52638	DEK	-1.29418	B-WICH	DIV5.DIV1	FALSE	rnorvegicus
0.862	1.1565	1.54818	TMED4	1.05579	COPII	D3.D0	TRUE	mmusculus
0.861	2.20652	-0.722276	VCL	-4.61883	Polycystin-1 multiprotein complex (ACTN1; CDH1; SRC; JUP; VCL; CTNNB1; PXN; BCAR1; PKD1; PTK2; TLN1)	Neu.IPS	TRUE	hsapiens
0.861	1.97017	2.08546	ACTG1	0.965732	BAF complex	D10.D0	TRUE	mmusculus
0.861	1.80971	-1.53537	ARPIN	-1.17209	AP-3 adaptor complex	D10.D0	FALSE	mmusculus
0.86	2.16737	-1.45042	NOLC1	-1.44386	Chs5p/Arf-1binding proteins (ChAPs)	Neu.IPS	FALSE	hsapiens
0.86	1.49477	-1.53561	KIF4	0.311387	DNMT3B	Neur.Stem	TRUE	drerio
0.86	1.12638	1.96838	ACTR1B	0.741	RSC	DIV14.DIV5	TRUE	rnorvegicus
0.86	1.89621	2.47592	ATAD3A	0.539847	NuA4/Tip60 HAT complex	D10.D0	FALSE	mmusculus
0.86	1.07759	-1.20404	TRAPPC3	-0.614529	TRAPP complex	D10.D3	TRUE	mmusculus
0.859	1.51952	-1.66303	DDX21	-2.01847	Toposome	NPC.iPS	TRUE	hsapiens
0.859	0.870402	1.42732	PI4KA	0.897631	P2X7 receptor signalling complex	DIV5.DIV1	TRUE	rnorvegicus
0.859	1.7506	-1.88025	XRCC5	-2.49677	DNA-PK-Ku-eIF2-NF90-NF45 complex	D10.D0	TRUE	mmusculus
0.859	1.09417	-1.78737	ACTL6A	-0.998055	SRCAP	D3.D0	TRUE	mmusculus
0.858	2.23805	1.8889	HSPA13	2.2012	RSC	Neu.IPS	TRUE	hsapiens
0.858	1.72124	1.21905	RPA2	1.13782	RC complex during S-phase of cell cycle	Neu.NPC	TRUE	hsapiens
0.858	1.57837	1.46549	ACTR1B	1.23004	RSC	DIV14.DIV1	TRUE	rnorvegicus
0.857	1.68372	0.74344	API5	2.97755	emerin C52	Neur.Stem	FALSE	drerio
0.857	1.87529	1.89402	RCOR3	0.441462	COREST complex	D10.D0	TRUE	mmusculus
0.856	1.71561	1.71458	TMED7	1.81216	COPII	Neu.NPC	TRUE	hsapiens
0.856	1.0266	0.964835	MYH9	0.767	emerin	DIV14.DIV5	TRUE	rnorvegicus
0.856	1.08856	1.71775	HIST1H4B	0.319	H3.3 com	DIV14.DIV5	TRUE	rnorvegicus
0.855	1.63534	-1.9697	MBD3A	0.277152	NuRD complex	Neur.Stem	TRUE	drerio
0.855	1.15173	0.806032	ACTR1A	0.477022	RSC	D10.D3	TRUE	mmusculus
0.855	1.13962	-1.36336	PPP2R1B	-1.10688	protein phosphatase type 2A complex (Rts1p)	D10.D3	TRUE	mmusculus
0.855	1.03175	-1.19667	HDAC1	-1.25844	HDAC1-PP1	D3.D0	TRUE	mmusculus
0.854	1.42735	-1.35386	ACTL6A	-1.88504	INO80.com	DIV14.DIV1	TRUE	rnorvegicus
0.854	1.09399	-1.89486	RBBP4	-1.57021	chromatin assembly complex	D10.D3	TRUE	mmusculus
0.854	1.07715	1.54058	FBXL20	0.514929	nuclear ubiquitin ligase complex	D3.D0	TRUE	mmusculus
0.853	1.51809	-1.57939	HSPA2	-1.0634	RSC	NPC.iPS	TRUE	hsapiens
0.853	2.16891	-2.70655	NUP37	-2.66535	Nuclear pore complex (NPC)	Neu.IPS	FALSE	hsapiens
0.853	1.10765	1.47516	CETN2	0.11345	Sac3-Thp	D10.D3	TRUE	mmusculus
0.853	1.17233	-1.117	EIF3J1	-1.18702	eIF3	D3.D0	TRUE	mmusculus
0.852	1.53713	-1.4598	IQGAP1	-1.15511	emerin C52	NPC.iPS	TRUE	hsapiens
0.852	1.47182	-1.17594	HDAC2	-1.12849	NuRD complex	NPC.iPS	TRUE	hsapiens
0.852	2.01776	1.81856	DDX23	1.68015	Spliceosome-U5	Neu.IPS	TRUE	hsapiens
0.852	1.73572	-1.59437	ARPC1B	-0.671552	Arp2/3 protein complex	D10.D0	TRUE	mmusculus
0.852	1.73155	1.47415	TLE3	-0.14013	NK-3-Groucho-HIPK2-SIN3A-RbpA48-HDAC1 complex	D10.D0	TRUE	mmusculus
0.852	1.06513	-1.85372	MYH9	-0.730454	emerin	D3.D0	TRUE	mmusculus
0.851	2.2071	3.80171	FAU	0.992457	cytoplasmic ribosomal small subunit	Neu.IPS	FALSE	hsapiens
0.851	1.41291	-0.995227	ACTL6A	-1.88504	SRCAP	DIV14.DIV1	TRUE	rnorvegicus
0.851	0.817939	-1.02139	ACTL6A	-1.07386	SRCAP	DIV5.DIV1	TRUE	rnorvegicus
0.851	1.07003	1.68826	GSPT2	0.432408	SMG-1-Upf1-eRF1-eRF3 complex (SURF)	D3.D0	TRUE	mmusculus
0.85	0.880204	1.31215	ACTR1A	0.668829	RSC	DIV5.DIV1	TRUE	rnorvegicus
0.85	1.02075	-1.42196	EIF4A3	-1.0349	eIF4F	D10.D3	TRUE	mmusculus
0.85	1.07413	-1.84257	RCOR2	-1.29955	COREST complex	D3.D0	TRUE	mmusculus
0.849	2.26132	-1.31798	TUBB6	-0.3298	Tubulins	Neu.IPS	TRUE	hsapiens
0.849	1.07405	1.17345	GEMIN5	0.134754	Survival of motor neuron (SMN) complex	D10.D3	TRUE	mmusculus
0.848	1.62387	0.76072	SNRPB	1.76689	SMN-PolII-RHA complex	Neur.Stem	FALSE	drerio
0.848	0.804679	-0.185157	CDC42	0.933421	Cdc42p/Ste20p complex	DIV5.DIV1	TRUE	rnorvegicus
0.848	0.760463	0.814219	GNB5	1.51202	heterotrimeric G-protein complex	DIV5.DIV1	TRUE	rnorvegicus
0.848	1.01555	1.13472	TRAPPC4	1.05998	TRAPP complex	D10.D3	TRUE	mmusculus
0.847	1.5834	-0.47794	MCM4	0.961253	MCM complex	Neur.Stem	TRUE	drerio
0.847	1.3615	-1.19274	PAK1	0.0105563	Cdc42p/Ste20p complex	DIV14.DIV1	TRUE	rnorvegicus
0.846	1.51257	2.30271	TJP1	0.426721	CF IIAm complex (Cleavage factor IIAm complex)	DIV14.DIV1	TRUE	rnorvegicus
0.846	1.0258	1.04663	MAP2K1	1.188	STE5-MAPK complex	DIV14.DIV5	TRUE	rnorvegicus
0.846	0.827907	-1.19035	ACTL6A	-1.07386	NuA4/Tip60 HAT complex	DIV5.DIV1	TRUE	rnorvegicus
0.846	1.81489	-1.82501	HDAC1	-2.967	CtBP	D10.D0	TRUE	mmusculus
0.846	1.62619	1.82508	SIN3A	-0.856275	DNMT3B	D10.D0	TRUE	mmusculus
0.846	1.06578	-1.25394	MFHAS1	-0.029395	SPB components	D10.D3	TRUE	mmusculus
0.845	1.46591	1.50364	EMD	0.410847	emerin C24	NPC.iPS	FALSE	hsapiens
0.845	1.44385	1.65778	TP53BP1	1.10243	53BP1-containing complex	NPC.iPS	FALSE	hsapiens
0.845	0.975	-0.753279	LOC100361025	-0.565	FIB-associated protein complex	DIV14.DIV5	TRUE	rnorvegicus
0.845	1.09831	1.25015	STXBP5L	1.18756	Sro1p/Sec4p/Sec9p complex	D10.D3	TRUE	mmusculus
0.844	1.43072	-0.916125	DDX20	-1.47528	Survival of motor neuron (SMN) complex	NPC.iPS	TRUE	hsapiens
0.844	1.64889	-0.543289	LSM8	0.849279	emerin C52	Neur.Stem	TRUE	drerio
0.844	1.61629	1.20025	ATRX	2.16781	H3.3 com	Neur.Stem	TRUE	drerio
0.843	1.61699	0.548075	GNAI1	1.97677	heterotrimeric G-protein complex	Neu.NPC	TRUE	hsapiens
0.843	0.838873	1.95777	MCMBP	-0.585568	MCM complex	DIV5.DIV1	FALSE	rnorvegicus
0.843	1.07968	-2.30886	HDAC1	-1.25844	NuRD complex	D3.D0	TRUE	mmusculus
0.842	1.54483	0.949213	CLTC	0.99724	Profilin 1 complex	Neu.NPC	TRUE	hsapiens
0.842	1.59097	-0.401405	MCM7	1.12386	MCM complex	Neur.Stem	TRUE	drerio
0.842	0.9494	-2.01649	FKBP5	-1.206	TNF-alpha/NF-kappa B signaling complex 7	DIV14.DIV5	TRUE	rnorvegicus
0.841	2.12941	-0.970076	API5	-2.05676	emerin C52	Neu.IPS	FALSE	hsapiens
0.841	1.52342	1.15254	HDAC2	0.7011	ELL.com	Neu.NPC	TRUE	hsapiens
0.841	1.55503	0.139499	RALBP1	0.447468	RalBP1-CCNB1-AP2A-NUMB-EPN1 complex	D10.D0	FALSE	mmusculus
0.841	1.62503	1.21345	EMD	-0.433198	emerin C24	D10.D0	FALSE	mmusculus
0.841	1.11044	2.39048	ATP6V1G2	2.12357	H+transporting ATPase; vacuolar	D10.D3	TRUE	mmusculus
0.84	2.10285	1.62478	ACTB	1.54803	P2X7 receptor signalling complex	Neu.IPS	TRUE	hsapiens
0.84	2.05756	-0.540943	TLN1	-4.24643	Polycystin-1 multiprotein complex (ACTN1; CDH1; SRC; JUP; VCL; CTNNB1; PXN; BCAR1; PKD1; PTK2; TLN1)	Neu.IPS	TRUE	hsapiens
0.84	1.62791	1.13948	ACTB	0.98403	P2X7 receptor signalling complex	Neu.NPC	TRUE	hsapiens
0.84	1.61577	-1.15544	HNRNPD	1.26837	mRNA cleavage factor complex (CFI)	Neur.Stem	TRUE	drerio
0.84	1.81931	-1.75286	HDGF	-2.49599	emerin C52	D10.D0	TRUE	mmusculus
0.839	2.05756	0.227776	PXN	-2.66775	Polycystin-1 multiprotein complex (ACTN1; CDH1; SRC; JUP; VCL; CTNNB1; PXN; BCAR1; PKD1; PTK2; TLN1)	Neu.IPS	TRUE	hsapiens
0.839	1.47752	-1.76648	URI1	-0.883848	PFD-like	Neur.Stem	FALSE	drerio
0.839	1.57364	-0.450364	MCM2	1.01984	MCM complex	Neur.Stem	TRUE	drerio
0.839	0.985167	-1.47706	CNOT2	-1.216	CCR4-NOT complex	DIV14.DIV5	TRUE	rnorvegicus
0.839	1.07718	-1.01833	PXN	-1.39958	Polycystin-1 multiprotein complex (ACTN1; CDH1; SRC; JUP; VCL; CTNNB1; PXN; BCAR1; PKD1; PTK2; TLN1)	D3.D0	TRUE	mmusculus
0.838	2.20648	1.72161	ACTB	1.54803	emerin	Neu.IPS	TRUE	hsapiens
0.838	1.53773	1.33212	EIF4A2	1.55941	eIF4F	Neu.NPC	TRUE	hsapiens
0.838	1.54212	-1.2417	POLR2D	-1.42869	RNA polymerase II core complex	Neu.NPC	FALSE	hsapiens
0.838	1.64374	-1.07874	SNX2	-0.870705	retromer complex	Neu.NPC	TRUE	hsapiens
0.838	1.60346	-0.642682	TUBB2A	-0.214363	Tubulins	Neu.NPC	TRUE	hsapiens
0.838	1.4125	-1.15143	ACTL6A	-1.88504	NuA4/Tip60 HAT complex	DIV14.DIV1	TRUE	rnorvegicus
0.838	1.73477	2.0622	ATAD3A	0.539847	SRCAP	D10.D0	FALSE	mmusculus
0.838	1.58726	1.50793	ERC2	3.11338	SPB components	D10.D0	TRUE	mmusculus
0.837	1.52969	-1.55565	MARS	-2.50641	multi-tRNAsynthase complex	NPC.iPS	FALSE	hsapiens
0.837	1.49338	1.92782	PFDN2	1.30444	Kinase maturation complex 1	NPC.iPS	FALSE	hsapiens
0.837	2.20154	-1.67934	PTBP1	-2.7207	CF IIAm complex (Cleavage factor IIAm complex)	Neu.IPS	TRUE	hsapiens
0.836	1.37218	1.56807	PPME1	0.47827	mitochondrial ribosomal small subunit	NPC.iPS	FALSE	hsapiens
0.836	1.60069	1.20103	SNRPE	1.84008	Survival of motor neuron (SMN) complex	Neur.Stem	FALSE	drerio
0.836	1.40888	1.25366	GNB4	2.90331	heterotrimeric G-protein complex	DIV14.DIV1	TRUE	rnorvegicus
0.836	1.08779	1.9192	CKB	0.539	emerin C52	DIV14.DIV5	TRUE	rnorvegicus
0.835	1.00111	1.78559	MAP2K1	1.43275	MAP2K1-BRAF-RAF1-YWHAE-KSR1 complex	D10.D3	TRUE	mmusculus
0.834	0.825474	1.64148	YWHAB	0.47181	emerin C25	DIV5.DIV1	TRUE	rnorvegicus
0.833	1.4347	0.812678	HMGB2	1.48108	HMGB1-HMGB2-HSC70-ERP60-GAPDH complex	NPC.iPS	TRUE	hsapiens
0.833	0.963262	1.181	PPP3R1	1.69952	calcineurin complex	D10.D3	TRUE	mmusculus
0.833	1.1665	2.50408	RPS27A	0.580888	cytoplasmic ribosomal small subunit	D3.D0	TRUE	mmusculus
0.833	1.06059	0.0501594	VAMP4	0.838589	SNARE complex	D3.D0	TRUE	mmusculus
0.832	1.72514	1.84512	HSPA5	0.397818	H2AX complex; isolated from cells without IR exposure	D10.D0	TRUE	mmusculus
0.832	1.72126	0.586697	SNAP25	2.59447	SNARE complex	D10.D0	TRUE	mmusculus
0.832	1.08588	1.46229	ACTG1	0.473211	INO80.com	D10.D3	TRUE	mmusculus
0.832	1.12451	1.51099	YWHAQ	0.557888	emerin C52	D10.D3	TRUE	mmusculus
0.832	1.05236	-1.31761	HIST2H2AB	-2.4958	Nucleosomal protein complex	D10.D3	FALSE	mmusculus
0.831	0.999	-0.781439	FBL	-0.595	FIB-associated protein complex	DIV14.DIV5	TRUE	rnorvegicus
0.83	1.0479	-0.705742	PPP1R10	-1.31661	HDAC1-PP1	D10.D3	TRUE	mmusculus
0.829	1.47853	2.10909	UQCRQ	1.99514	Cytochrome bc1 complex (Ubiquinol-cytochrome c reductase complex; complex III)	DIV14.DIV1	FALSE	rnorvegicus
0.829	1.5547	0.753765	HSPA8	-0.109049	HMGB1-HMGB2-HSC70-ERP60-GAPDH complex	D10.D0	TRUE	mmusculus
0.828	1.9215	-0.0361028	SMC4	-2.3714	DNMT3B	Neu.IPS	TRUE	hsapiens
0.828	1.69487	-2.16083	HDAC1	-2.967	NuRD complex	D10.D0	TRUE	mmusculus
0.828	1.0527	2.0562	PHF1	0.783657	Polycomb-group repressive complex 2 (PRC2)	D3.D0	TRUE	mmusculus
0.828	0.986046	-0.842831	HMGB1	-1.70231	HMGB1-HMGB2-HSC70-ERP60-GAPDH complex	D3.D0	TRUE	mmusculus
0.827	0.814113	2.48803	GLE1	0.250598	Nuclear pore complex (NPC)	DIV5.DIV1	TRUE	rnorvegicus
0.827	0.992608	-1.68419	SNRPG	-1.99032	Spliceosome-Sm	D10.D3	TRUE	mmusculus
0.826	1.53989	-0.270501	YWHAE1	1.30048	emerin C52	Neur.Stem	TRUE	drerio
0.826	1.66826	0.47901	STX1B	2.40894	SNARE complex	D10.D0	TRUE	mmusculus
0.826	1.05949	1.84467	ACTB	0.126968	BAF complex	D10.D3	TRUE	mmusculus
0.826	1.13987	1.38818	M6PR	0.231625	Polycomb-group repressive complex 1 (PRC1)	D10.D3	FALSE	mmusculus
0.826	1.06059	0.470847	SNAP25	1.3122	SNARE complex	D3.D0	TRUE	mmusculus
0.825	1.57785	1.14819	SKP1A	-0.00999018	p27-cyclinE-Cdk2 - Ubiquitin E3 ligase (SKP1A; SKP2; CUL1; CKS1B; RBX1) complex	D10.D0	FALSE	mmusculus
0.824	1.87746	1.2067	ACTB	1.54803	Emerin regulatory complex	Neu.IPS	TRUE	hsapiens
0.824	2.09022	-1.82926	EIF4G1	-2.09737	eIF4F	Neu.IPS	TRUE	hsapiens
0.824	1.57241	1.85651	HDAC2	0.7011	Sin3-CI	Neu.NPC	TRUE	hsapiens
0.824	1.39451	0.959605	RPA2	1.13782	53BP1-containing complex	Neu.NPC	TRUE	hsapiens
0.824	1.69854	-1.7056	UBQLN2	0.152466	H+transporting ATPase; vacuolar	D10.D0	TRUE	mmusculus
0.824	1.75856	-2.28535	HDAC1	-2.967	emerin C32	D10.D0	TRUE	mmusculus
0.824	0.953274	-1.07635	HMGB2	-0.999251	HMGB1-HMGB2-HSC70-ERP60-GAPDH complex	D10.D3	TRUE	mmusculus
0.824	1.08191	1.19951	TUBAL3	0.705546	smc5p-Smc6p complex	D10.D3	TRUE	mmusculus
0.823	1.44178	1.94648	CNN3	1.80842	emerin	NPC.iPS	TRUE	hsapiens
0.823	1.95864	1.3707	BAZ1B	0.29848	B-WICH	Neu.IPS	TRUE	hsapiens
0.823	1.82841	1.45031	ACTR1B	1.11639	RSC	D10.D0	TRUE	mmusculus
0.823	1.78998	-2.35228	NASP	-3.27613	H3.3 com	D10.D0	FALSE	mmusculus
0.823	1.66069	-1.41383	HDAC1	-2.967	NK-3-Groucho-HIPK2-SIN3A-RbpA48-HDAC1 complex	D10.D0	TRUE	mmusculus
0.823	1.09352	-1.48987	XRCC5	-1.69796	H3.3 com	D3.D0	TRUE	mmusculus
0.822	1.50012	1.67273	CBX5	3.10099	Suv39h1	Neur.Stem	TRUE	drerio
0.822	0.751598	-0.903257	XRCC6	-0.787313	DNA-PK-Ku-eIF2-NF90-NF45 complex	DIV5.DIV1	TRUE	rnorvegicus
0.821	1.89999	-0.629459	SMARCA5	-0.804777	ISW1b complex	Neu.IPS	TRUE	hsapiens
0.821	1.54034	1.80508	WIBG	1.06963	Exon Junction Complex (EJC)	Neu.NPC	FALSE	hsapiens
0.821	1.01066	0.935842	SH3KBP1	0.388942	RICH1/AMOT polarity complex; Flag-Rich1 precipitated	D3.D0	TRUE	mmusculus
0.82	1.37093	-0.563726	HDGF	-0.905253	ISW1b complex	Neu.NPC	TRUE	hsapiens
0.82	0.792503	-1.29957	ACTN4	-0.488123	P2X7 receptor signalling complex	DIV5.DIV1	TRUE	rnorvegicus
0.82	1.05415	0.644966	CTNNB1	0.164357	Polycystin-1 multiprotein complex (ACTN1; CDH1; SRC; JUP; VCL; CTNNB1; PXN; BCAR1; PKD1; PTK2; TLN1)	D3.D0	TRUE	mmusculus
0.819	1.47644	1.87834	TPR	1.2069	Nuclear pore complex (NPC)	NPC.iPS	FALSE	hsapiens
0.819	1.1013	0.724632	HSPA8	0.398573	RSC	D10.D3	TRUE	mmusculus
0.819	1.07786	-1.47419	RBBP4	-1.57021	HCF-1N	D10.D3	TRUE	mmusculus
0.818	1.53989	0.178226	HNRNPL2	2.04268	emerin C52	Neur.Stem	TRUE	drerio
0.818	1.0242	1.69694	STXBP5	1.506	Sro1p/Sec4p/Sec9p complex	DIV14.DIV5	TRUE	rnorvegicus
0.818	1.66608	-1.33366	PHC2	-2.39856	Polycomb-group repressive complex 1 (PRC1)	D10.D0	TRUE	mmusculus
0.818	0.976251	-1.76348	CUL1	-0.960703	TNF-alpha/NF-kappa B signaling complex (CHUK; BTRC; NFKB2; PPP6C; REL; CUL1; IKBKE; SAPS2; SAPS1; ANKRD28; RELA; SKP1)	D3.D0	TRUE	mmusculus
0.818	1.06417	-1.931	RBPJ	-1.54265	HES1 promoter-Notch enhancer complex	D3.D0	TRUE	mmusculus
0.818	1.02016	-1.11708	PRKDC	-1.40412	DNA-PK-Ku-eIF2-NF90-NF45 complex	D3.D0	TRUE	mmusculus
0.817	2.06714	-2.09889	ACTG1	-1.7031	INO80.com	Neu.IPS	TRUE	hsapiens
0.817	2.05502	1.67125	MRPL1	1.10248	mitochondrial ribosomal large subunit	Neu.IPS	FALSE	hsapiens
0.817	1.54086	-1.64417	RBBP4	-1.78285	HCF-1N	Neu.NPC	TRUE	hsapiens
0.817	1.53564	1.14001	SNRPB	1.76689	Survival of motor neuron (SMN) complex	Neur.Stem	FALSE	drerio
0.817	0.970625	-1.1813	JUP	-0.487	Polycystin-1 multiprotein complex (ACTN1; CDH1; SRC; JUP; VCL; CTNNB1; PXN; BCAR1; PKD1; PTK2; TLN1)	DIV14.DIV5	TRUE	rnorvegicus
0.817	1.05175	-0.92728	EMD	-0.813065	emerin	D10.D3	FALSE	mmusculus
0.817	0.965482	-1.45862	CDK2	-1.70602	p27-cyclinE-Cdk2 - Ubiquitin E3 ligase (SKP1A; SKP2; CUL1; CKS1B; RBX1) complex	D3.D0	TRUE	mmusculus
0.817	1.08097	-1.536	RPS15	-0.653898	mitochondrial ribosomal small subunit	D3.D0	FALSE	mmusculus
0.816	1.44383	0.925594	TUBB2B	1.56137	Profilin 1 complex	NPC.iPS	TRUE	hsapiens
0.816	1.44779	0.211463	TUBB4A	1.68772	Tubulins	DIV14.DIV1	TRUE	rnorvegicus
0.816	1.60975	-0.574396	PPP4C	-1.94853	HDAC1-PP1	D10.D0	TRUE	mmusculus
0.816	1.01204	-1.31871	HDAC1	-1.70856	DNMT3B	D10.D3	TRUE	mmusculus
0.815	1.42876	2.03822	CPSF7	1.25731	CF IIAm complex (Cleavage factor IIAm complex)	NPC.iPS	TRUE	hsapiens
0.815	1.46816	-0.449999	EMD	-1.00484	Emerin regulatory complex	Neu.NPC	FALSE	hsapiens
0.815	1.01833	2.11992	SETDB1	0.079	Suv39h1	DIV14.DIV5	TRUE	rnorvegicus
0.815	1.59929	-1.16379	CDK2	-2.55169	p27-cyclinE-Cdk2 - Ubiquitin E3 ligase (SKP1A; SKP2; CUL1; CKS1B; RBX1) complex	D10.D0	TRUE	mmusculus
0.815	1.05222	-1.71877	ZEB1	-1.44916	CtBP	D3.D0	TRUE	mmusculus
0.814	1.56541	0.798512	HNRNPM	3.57119	Large Drosha complex	Neur.Stem	TRUE	drerio
0.814	1.74081	1.80799	ACTB	0.719985	BAF complex	D10.D0	TRUE	mmusculus
0.814	1.00321	-1.47096	RRP7A	-0.793801	UTP C complex	D10.D3	FALSE	mmusculus
0.813	1.37021	1.17368	MTA2	1.2227	NuRD complex	NPC.iPS	TRUE	hsapiens
0.813	1.5308	0.125338	EMD	-0.433198	Emerin regulatory complex	D10.D0	FALSE	mmusculus
0.812	1.47748	1.54088	FAM50A	2.15329	Spliceosome-C	Neur.Stem	FALSE	drerio
0.812	0.94175	1.75438	CDK9	0.099	HES1 promoter-Notch enhancer complex	DIV14.DIV5	TRUE	rnorvegicus
0.812	1.66826	-0.135763	VAMP4	1.34979	SNARE complex	D10.D0	TRUE	mmusculus
0.812	0.959695	1.16347	ARXES1	0.481405	signal peptidase complex	D10.D3	TRUE	mmusculus
0.812	0.994516	-1.75967	FBXL20	-0.838433	nuclear ubiquitin ligase complex	D10.D3	TRUE	mmusculus
0.811	2.03537	-1.5209	TJP1	-2.53376	CF IIAm complex (Cleavage factor IIAm complex)	Neu.IPS	TRUE	hsapiens
0.811	1.5345	-1.15136	GEMIN5	-0.981594	Survival of motor neuron (SMN) complex	Neur.Stem	TRUE	drerio
0.811	1.04247	-1.66639	MED6	-1.64274	Kornberg's mediator (SRB) complex	D10.D3	FALSE	mmusculus
0.81	1.36453	-0.24911	PSIP1	-0.29316	ISW1b complex	Neu.NPC	TRUE	hsapiens
0.81	1.73068	1.74403	CACTIN	0.28762	Spliceosome-C	D10.D0	TRUE	mmusculus
0.81	1.05814	1.4738	HSP90AA1	0.376848	HCF-1N	D10.D3	TRUE	mmusculus
0.81	0.97217	0.770288	AP2A2	0.706354	RalBP1-CCNB1-AP2A-NUMB-EPN1 complex	D3.D0	TRUE	mmusculus
0.81	0.926936	0.710554	EPN1	0.646043	RalBP1-CCNB1-AP2A-NUMB-EPN1 complex	D3.D0	TRUE	mmusculus
0.81	1.03508	1.4303	GNAZ	2.11565	heterotrimeric G-protein complex	D3.D0	TRUE	mmusculus
0.809	2.04561	-1.14031	ACTG1	-1.7031	Profilin 1 complex	Neu.IPS	TRUE	hsapiens
0.809	1.50272	0.659116	ATP6V0D1	2.79481	H+transporting ATPase; vacuolar	Neu.NPC	TRUE	hsapiens
0.809	1.56973	-0.387746	SNRPD1	1.10655	emerin C52	Neur.Stem	TRUE	drerio
0.809	1.45873	-1.27421	STK38A	-0.352658	Flag-FCP1	Neur.Stem	TRUE	drerio
0.809	1.70706	-2.33879	HDAC1	-2.967	ELL.com	D10.D0	TRUE	mmusculus
0.809	1.52324	1.15055	POLR1E	0.377765	RNA polymerase I core complex	D10.D0	FALSE	mmusculus
0.809	1.55325	-1.46167	DYNC2H1	-0.692198	cytoplasmic dynein complex	D10.D0	TRUE	mmusculus
0.809	1.08302	-1.58198	FAM32A	-1.91573	Spliceosome-C	D10.D3	FALSE	mmusculus
0.809	1.00093	-1.05218	EHMT1	-1.70214	E2F6.com-1	D10.D3	TRUE	mmusculus
0.809	0.966085	1.40955	MAP2K1	1.43275	STE5-MAPK complex	D10.D3	TRUE	mmusculus
0.808	1.44117	0.941349	RPA3	0.801733	RC complex during S-phase of cell cycle	Neu.NPC	FALSE	hsapiens
0.808	1.38198	-1.08136	SUPT16H	-1.7215	HES1 promoter-Notch enhancer complex	DIV14.DIV1	FALSE	rnorvegicus
0.808	0.821861	-1.77497	ACTL6A	-1.07386	BAF complex	DIV5.DIV1	TRUE	rnorvegicus
0.808	1.65905	1.54017	GNAZ	3.09381	heterotrimeric G-protein complex	D10.D0	TRUE	mmusculus
0.808	1.06052	-1.99896	HDAC1	-1.25844	Rpd3L complex	D3.D0	TRUE	mmusculus
0.808	0.973288	0.975409	WDR24	0.428928	chromatin assembly complex	D3.D0	TRUE	mmusculus
0.807	1.35405	-1.16777	LARP1	-1.31433	HMC Complex	NPC.iPS	TRUE	hsapiens
0.807	1.86035	0.685824	SMARCA5	-0.804777	DNMT3B	Neu.IPS	TRUE	hsapiens
0.807	1.27615	1.56817	PRMT5	0.222945	Flag-FCP1	DIV14.DIV1	FALSE	rnorvegicus
0.807	1.06412	-1.93518	BOP1	-1.71563	Yph1-L	D10.D3	FALSE	mmusculus
0.807	1.04199	1.90496	MBD2	-0.202027	NuRD complex	D10.D3	TRUE	mmusculus
0.807	1.00395	1.42655	AP3S2	0.856218	AP-3 adaptor complex	D3.D0	TRUE	mmusculus
0.806	1.06234	1.1065	CTBP1	0.0677105	CtBP	D10.D3	TRUE	mmusculus
0.806	0.95453	0.539046	HSPA8	-0.507621	HMGB1-HMGB2-HSC70-ERP60-GAPDH complex	D3.D0	TRUE	mmusculus
0.805	1.41277	-1.70293	NUP93	-1.46735	Nuclear pore complex (NPC)	NPC.iPS	FALSE	hsapiens
0.805	1.2866	1.58891	AP2M1	1.60567	AP-1 adaptor complex	DIV14.DIV1	TRUE	rnorvegicus
0.805	0.995481	-1.8303	AP1G1	-0.447709	AP-1 adaptor complex	D10.D3	TRUE	mmusculus
0.805	0.944469	-1.05978	HMGB1	-0.987511	HMGB1-HMGB2-HSC70-ERP60-GAPDH complex	D10.D3	TRUE	mmusculus
0.805	1.0015	2.06042	TBKBP1	0.355109	Kinase maturation complex 2	D3.D0	TRUE	mmusculus
0.804	1.09965	1.81329	DCAF5	-0.148507	Rpd3L complex	D10.D3	TRUE	mmusculus
0.804	1.05391	-2.40339	EEF1A1	-0.605492	mitochondrial ribosomal large subunit	D3.D0	TRUE	mmusculus
0.803	1.46092	-1.62902	SETDB1A	0.562963	Suv39h1	Neur.Stem	TRUE	drerio
0.803	1.67347	-2.21037	RBPJ	-2.96584	HES1 promoter-Notch enhancer complex	D10.D0	TRUE	mmusculus
0.803	1.04976	-1.88883	MLLT3	-1.83438	AF4.com	D10.D3	TRUE	mmusculus
0.803	1.07805	1.50669	HSPA8	0.398573	HCF-1N	D10.D3	TRUE	mmusculus
0.802	1.34138	1.44532	EIF1B	0.97553	multi-eIF complex	NPC.iPS	TRUE	hsapiens
0.802	1.94813	-1.28493	SNX2	-0.511472	retromer complex	Neu.IPS	TRUE	hsapiens
0.802	1.48825	1.97972	DPY30	0.756717	emerin C32	Neu.NPC	FALSE	hsapiens
0.801	1.3305	-1.25985	FBL	-0.71394	FIB-associated protein complex	Neu.NPC	TRUE	hsapiens
0.801	0.8998	-0.565861	MAP2K2	-0.129	STE5-MAPK complex	DIV14.DIV5	TRUE	rnorvegicus
0.801	0.936506	1.24941	EIF4A3	0.35212	eIF4F	D3.D0	TRUE	mmusculus
0.8	1.2572	1.33943	GTF2F1	1.17333	Flag-FCP1	NPC.iPS	FALSE	hsapiens
0.8	1.39967	-0.945186	BCAS2	-1.12999	Spliceosome-Prp19	Neu.NPC	FALSE	hsapiens
0.8	1.44787	0.763519	HNRNPABA	3.67152	mRNA cleavage factor complex (CFI)	Neur.Stem	TRUE	drerio
0.8	1.69983	1.63269	HSPA5	0.397818	HCF-1N	D10.D0	TRUE	mmusculus
0.8	1.73582	2.01437	YWHAB	0.702713	emerin C25	D10.D0	TRUE	mmusculus
0.8	1.49069	1.29362	CDK16	1.85827	Pho85p/Pcl1p complex	D10.D0	TRUE	mmusculus
0.8	1.4645	-0.195333	PPP1R10	-1.36751	HDAC1-PP1	D10.D0	TRUE	mmusculus
0.8	0.978834	-1.87726	ARPIN	-0.455601	AP-3 adaptor complex	D10.D3	FALSE	mmusculus
0.799	0.736291	0.999911	EIF2S3	0.333815	DNA-PK-Ku-eIF2-NF90-NF45 complex	DIV5.DIV1	TRUE	rnorvegicus
0.799	1.56816	2.05962	NAA38	0.165534	Spliceosome-LSm	D10.D0	FALSE	mmusculus
0.799	0.961099	-1.36799	PRKACA	-0.540059	cAMP-dependent protein kinase	D3.D0	TRUE	mmusculus
0.798	1.43696	-0.888759	SNX1	-0.62257	retromer complex	Neu.NPC	TRUE	hsapiens
0.798	0.9442	-1.03405	EMD	-0.754	emerin	DIV14.DIV5	FALSE	rnorvegicus
0.798	0.973667	1.63777	MPP3	1.134	P2X7 receptor signalling complex	DIV14.DIV5	TRUE	rnorvegicus
0.798	0.878	1.42909	PPIL3	0.039	Spliceosome-C	DIV14.DIV5	TRUE	rnorvegicus
0.798	0.730423	-1.1308	RPA2	-1.28243	RC complex during S-phase of cell cycle	DIV5.DIV1	TRUE	rnorvegicus
0.798	1.0044	1.53247	SIN3A	-0.234054	SIN3 complex	D10.D3	TRUE	mmusculus
0.797	1.0022	1.85263	YWHAB	0.377	emerin C25	DIV14.DIV5	TRUE	rnorvegicus
0.797	1.00801	-1.91959	HDAC1	-1.25844	emerin C32	D3.D0	TRUE	mmusculus
0.796	1.34181	1.27055	TUBA1B	1.42391	FIB-associated protein complex	Neu.NPC	TRUE	hsapiens
0.796	1.38332	0.881184	DHX9	2.77939	Toposome	Neur.Stem	TRUE	drerio
0.796	1.6705	-1.55651	SP1	-2.66712	HCF-1N	D10.D0	TRUE	mmusculus
0.796	0.980541	1.3178	PAM16	1.56328	PAM complex	D3.D0	TRUE	mmusculus
0.796	0.916372	-0.97364	PPP4C	-1.1046	HDAC1-PP1	D3.D0	TRUE	mmusculus
0.795	1.46561	1.7444	HSPA13	1.20743	RSC	Neu.NPC	TRUE	hsapiens
0.795	1.48656	0.397896	WDR47	1.74852	heterotrimeric G-protein complex	Neu.NPC	FALSE	hsapiens
0.795	0.998	-2.41021	DPF2	-1.649	BAF complex	DIV14.DIV5	TRUE	rnorvegicus
0.795	0.929725	-0.216265	PPP4C	-0.843923	HDAC1-PP1	D10.D3	TRUE	mmusculus
0.794	1.38975	-0.495734	VCP	-0.907757	Profilin 1 complex	Neu.NPC	TRUE	hsapiens
0.794	0.8875	0.653001	SLC27A3	1.114	Fatty Acid Import Complex	DIV14.DIV5	TRUE	rnorvegicus
0.794	0.90829	-1.32523	MAPK7	-0.0667525	STE5-MAPK complex	D10.D3	TRUE	mmusculus
0.793	1.82475	1.20354	VPS26B	2.72242	retromer complex	Neu.IPS	TRUE	hsapiens
0.793	1.35914	0.65997	ACTB	0.49459	Emerin regulatory complex	Neu.NPC	TRUE	hsapiens
0.793	1.69265	1.74003	ACTL6B	0.659788	BAF complex	D10.D0	TRUE	mmusculus
0.793	1.59904	-1.82689	YY1	-2.35859	INO80 complex	D10.D0	TRUE	mmusculus
0.793	1.71707	-2.60501	RPS18	-1.15853	mitochondrial ribosomal small subunit	D10.D0	TRUE	mmusculus
0.793	1.04967	-1.01655	SMARCC1	-1.27949	RSC	D10.D3	TRUE	mmusculus
0.793	1.0306	2.14532	LSM11	0.0574522	telomerase	D10.D3	FALSE	mmusculus
0.792	1.90472	-0.968117	GNB4	0.00327	heterotrimeric G-protein complex	Neu.IPS	TRUE	hsapiens
0.792	1.88804	1.16235	RPA2	0.404187	RC complex during S-phase of cell cycle	Neu.IPS	TRUE	hsapiens
0.792	1.43065	0.494104	POLR2A	1.38045	SMN-PolII-RHA complex	Neur.Stem	TRUE	drerio
0.792	1.01454	-1.08842	EHMT1	-1.70214	CtBP	D10.D3	TRUE	mmusculus
0.792	1.024	-1.64953	UBQLN2	-0.313629	H+transporting ATPase; vacuolar	D3.D0	TRUE	mmusculus
0.791	1.39376	-1.47324	MCM4	-2.03439	emerin C24	Neu.NPC	TRUE	hsapiens
0.791	0.8998	1.97388	C1QBP	0.178	emerin C24	DIV14.DIV5	FALSE	rnorvegicus
0.791	0.912027	1.44282	ACTR1B	1.29431	dynactin complex	D10.D3	TRUE	mmusculus
0.791	0.947831	-1.48906	RBM10	-1.42375	2A-DUB	D10.D3	TRUE	mmusculus
0.79	1.84823	-0.857316	PARP1	-1.78083	Rap1 complex	Neu.IPS	TRUE	hsapiens
0.79	1.30909	-1.6727	PPIH	0.559834	Spliceosome-U4/U6	Neur.Stem	TRUE	drerio
0.79	1.48625	1.58282	CETN2	0.0669109	Sac3-Thp	D10.D0	TRUE	mmusculus
0.79	0.980541	1.3178	GM9803	1.56328	PAM complex	D3.D0	TRUE	mmusculus
0.789	1.4817	-0.962308	API5	-1.85949	emerin C52	Neu.NPC	FALSE	hsapiens
0.789	1.45917	1.22435	NUDT21	0.602517	CF IIAm complex (Cleavage factor IIAm complex)	Neu.NPC	FALSE	hsapiens
0.789	0.977	2.25257	UBL5	0.275	Spliceosome-B	DIV14.DIV5	FALSE	rnorvegicus
0.789	1.61664	-1.50079	GNAI2	0.145689	heterotrimeric G-protein complex	D10.D0	TRUE	mmusculus
0.788	1.73738	0.610269	SMC2	-0.968737	DNMT3B	Neu.IPS	TRUE	hsapiens
0.788	1.31463	-0.0133803	TUBA1B	0.639612	FIB-associated protein complex	DIV14.DIV1	TRUE	rnorvegicus
0.788	0.963967	0.744789	AP2A1	1.01031	RalBP1-CCNB1-AP2A-NUMB-EPN1 complex	D10.D3	TRUE	mmusculus
0.787	1.20412	0.430004	KDM1A	0.907937	CtBP	NPC.iPS	TRUE	hsapiens
0.787	0.944857	-1.4447	BCKDK	-0.23	mitochondrial pyruvate dehydrogenase complex	DIV14.DIV5	TRUE	rnorvegicus
0.787	1.67693	-2.46824	HDAC1	-2.967	Rpd3L complex	D10.D0	TRUE	mmusculus
0.786	0.993448	1.51945	MSI2	-0.0619946	mRNA cleavage factor complex (CFI)	D10.D3	TRUE	mmusculus
0.785	1.37268	-1.76127	EIF3L	-1.37306	H2AX complex; isolated from cells without IR exposure	NPC.iPS	FALSE	hsapiens
0.785	1.47385	1.228	ATRX	0.461053	H3.3 com	Neu.NPC	TRUE	hsapiens
0.785	1.49368	1.14965	SLTM	2.13264	eIF3	Neur.Stem	TRUE	drerio
0.785	0.892166	-1.4699	TOP2A	-1.02398	Toposome	D3.D0	TRUE	mmusculus
0.784	1.9	0.916995	TUBB4A	3.12138	Tubulins	Neu.IPS	TRUE	hsapiens
0.783	1.22916	0.508183	RCOR1	1.00809	CtBP	NPC.iPS	TRUE	hsapiens
0.783	1.90529	0.945903	YWHAQ	1.10684	emerin C52	Neu.IPS	TRUE	hsapiens
0.783	0.95	-1.45521	PDP1	-0.236	mitochondrial pyruvate dehydrogenase complex	DIV14.DIV5	TRUE	rnorvegicus
0.782	0.885069	0.604726	ABI1	1.08608	Wave-2 complex	D10.D3	TRUE	mmusculus
0.782	0.883542	-1.25917	CYFIP1	-0.787755	Wave-2 complex	D3.D0	TRUE	mmusculus
0.781	1.29333	1.64068	LSM5	1.51185	Spliceosome-LSm	NPC.iPS	FALSE	hsapiens
0.781	1.4156	-0.877219	HSPA4B	0.275961	HCF-1N	Neur.Stem	TRUE	drerio
0.781	1.29895	1.49733	DDX21	2.97627	B-WICH	Neur.Stem	TRUE	drerio
0.78	1.48727	1.05914	HNRNPU	-0.605402	emerin C24	D10.D0	TRUE	mmusculus
0.78	1.02266	1.65812	SIN3A	-0.234054	Rpd3L complex	D10.D3	TRUE	mmusculus
0.78	0.94385	1.01214	SIN3A	-0.234054	NK-3-Groucho-HIPK2-SIN3A-RbpA48-HDAC1 complex	D10.D3	TRUE	mmusculus
0.779	1.29569	-1.02733	CLTC	-0.549837	Profilin 1 complex	NPC.iPS	TRUE	hsapiens
0.779	1.01204	1.30324	YWHAE	0.417306	emerin C52	D10.D3	TRUE	mmusculus
0.779	0.959695	1.16347	ARXES2	0.481405	signal peptidase complex	D10.D3	TRUE	mmusculus
0.779	0.987372	-1.15226	RAB8B	-0.613733	Sro1p/Sec4p/Sec9p complex	D10.D3	TRUE	mmusculus
0.778	1.27071	-1.81275	CPSF3	-1.17221	CF IIAm complex (Cleavage factor IIAm complex)	NPC.iPS	TRUE	hsapiens
0.778	1.81132	1.19115	VPS29	2.70632	retromer complex	Neu.IPS	FALSE	hsapiens
0.777	1.32002	-2.06818	HDAC2	-1.12849	Sin3-CI	NPC.iPS	TRUE	hsapiens
0.777	1.82527	-0.468871	KPNB1	-1.83102	Nuclear cap binding complex (NCBC)	Neu.IPS	TRUE	hsapiens
0.777	0.942143	0.219474	TUBB4B	0.621	Tubulins	DIV14.DIV5	TRUE	rnorvegicus
0.777	0.934857	-1.10416	PRKAG1	-0.71603	Snf1p/Snf4p/Sip2p complex	D10.D3	TRUE	mmusculus
0.777	0.974008	0.49438	SAFB	0.350426	eIF3	D3.D0	TRUE	mmusculus
0.776	1.74378	-1.21767	MCM4	-3.64971	MMS22L-TONSL	Neu.IPS	TRUE	hsapiens
0.776	1.33142	0.0168527	RAB10	0.2991	Sro1p/Sec4p/Sec9p complex	Neu.NPC	TRUE	hsapiens
0.776	1.43396	1.01286	SNRPD2	1.61438	Survival of motor neuron (SMN) complex	Neur.Stem	FALSE	drerio
0.776	1.5928	-0.981983	CD2AP	-1.47691	RICH1/AMOT polarity complex; Flag-Rich1 precipitated	D10.D0	TRUE	mmusculus
0.776	0.987278	2.06142	ATAD3A	0.683687	NuA4/Tip60 HAT complex	D3.D0	FALSE	mmusculus
0.776	0.889956	-1.2109	KIF11	-1.45716	2A-DUB	D3.D0	TRUE	mmusculus
0.775	1.37344	-1.30557	HSP90AB1	-0.823267	P2X7 receptor signalling complex	NPC.iPS	TRUE	hsapiens
0.775	1.69505	1.64084	DRAP1	1.16211	RNA polymerase II complex; chromatin structure modifying	Neu.IPS	TRUE	hsapiens
0.775	1.47478	-1.09535	GEMIN2	-0.914412	Survival of motor neuron (SMN) complex	Neur.Stem	FALSE	drerio
0.775	1.41235	-1.22563	CDK17	-0.464161	Pho85p/Pcl1p complex	D10.D0	TRUE	mmusculus
0.774	1.2711	-0.758144	CTNNBL1	-0.62436	Spliceosome-Prp19	NPC.iPS	FALSE	hsapiens
0.773	1.38492	1.83306	YWHAH	1.57834	Kinase maturation complex 1	DIV14.DIV1	TRUE	rnorvegicus
0.773	1.50999	-1.44855	CHAF1B	-2.29903	chromatin assembly complex	D10.D0	FALSE	mmusculus
0.773	1.58063	-3.00111	EEF1A1	-1.20861	mitochondrial ribosomal large subunit	D10.D0	TRUE	mmusculus
0.772	1.38624	-1.76256	ATAD3	-0.0647817	SRCAP	Neur.Stem	FALSE	drerio
0.772	0.96	2.2742	MARK2	0.938	Kinase maturation complex 1	DIV14.DIV5	TRUE	rnorvegicus
0.772	1.57416	-1.4361	ACTL6A	-1.82266	INO80.com	D10.D0	TRUE	mmusculus
0.772	1.46532	0.584622	AP2A2	1.34	RalBP1-CCNB1-AP2A-NUMB-EPN1 complex	D10.D0	TRUE	mmusculus
0.771	1.39317	-1.76784	PYM1	0.753348	Exon Junction Complex (EJC)	Neur.Stem	FALSE	drerio
0.771	0.8842	0.829915	MAPK1	1.011	STE5-MAPK complex	DIV14.DIV5	TRUE	rnorvegicus
0.771	1.52662	1.47949	TUBAL3	1.13336	smc5p-Smc6p complex	D10.D0	TRUE	mmusculus
0.77	0.8586	-0.893431	CNN3	-0.647	emerin	DIV14.DIV5	TRUE	rnorvegicus
0.77	1.42671	0.558952	EPN1	1.28853	RalBP1-CCNB1-AP2A-NUMB-EPN1 complex	D10.D0	TRUE	mmusculus
0.769	1.89045	-1.81777	ATPIF1	-0.751073	F0/F1 ATP synthase (complex V)	Neu.IPS	FALSE	hsapiens
0.769	1.74751	-0.83793	POLR2H	-1.67343	RNA polymerase II core complex	Neu.IPS	FALSE	hsapiens
0.769	1.42154	1.38853	SMARCA1	-0.421548	ISW1b complex	D10.D0	TRUE	mmusculus
0.768	1.2415	-1.15288	EEF1A1	-0.896563	eEF1	NPC.iPS	TRUE	hsapiens
0.768	1.74109	1.77282	EIF1	0.647313	multi-eIF complex	Neu.IPS	TRUE	hsapiens
0.768	1.50213	0.755704	STXBP5L	1.38445	Sro1p/Sec4p/Sec9p complex	D10.D0	TRUE	mmusculus
0.767	1.21892	-0.241805	SMU1	-1.2456	Spliceosome-B	NPC.iPS	FALSE	hsapiens
0.767	1.25759	-0.468962	SMARCA5	-0.720887	ISW1b complex	Neu.NPC	TRUE	hsapiens
0.767	0.908667	1.8743	PPP6R2	0.848	TNF-alpha/NF-kappa B signaling complex (CHUK; BTRC; NFKB2; PPP6C; REL; CUL1; IKBKE; SAPS2; SAPS1; ANKRD28; RELA; SKP1)	DIV14.DIV5	TRUE	rnorvegicus
0.767	0.928429	-0.660908	TUBB3	-0.264	Tubulins	DIV14.DIV5	TRUE	rnorvegicus
0.767	1.4036	-0.926457	CDKN1B	-2.29078	p27-cyclinE-Cdk2 - Ubiquitin E3 ligase (SKP1A; SKP2; CUL1; CKS1B; RBX1) complex	D10.D0	TRUE	mmusculus
0.766	1.72451	1.71992	DAD1	1.5315	oligosaccharyl transferase complex	Neu.IPS	FALSE	hsapiens
0.766	1.30807	-0.980096	RPA1	-0.933213	53BP1-containing complex	Neu.NPC	FALSE	hsapiens
0.766	1.36731	0.352768	VPS26B	0.998953	retromer complex	Neu.NPC	TRUE	hsapiens
0.766	1.47555	-1.21057	NASP	-0.529718	H3.3 com	Neur.Stem	FALSE	drerio
0.766	1.22338	1.72147	HSPA8	-0.0387142	Spliceosome-Prp19	DIV14.DIV1	TRUE	rnorvegicus
0.765	1.28721	1.74404	VPS26B	1.72347	retromer complex	NPC.iPS	TRUE	hsapiens
0.765	1.27007	-0.494603	HDGFRP2	-0.770772	ISW1b complex	Neu.NPC	FALSE	hsapiens
0.765	0.69786	-0.947748	EEF1D	-0.393786	eEF1	DIV5.DIV1	TRUE	rnorvegicus
0.765	1.60256	1.19457	ACTR1A	0.828938	RSC	D10.D0	TRUE	mmusculus
0.765	1.54866	-2.47051	HDAC1	-2.967	Sin3-CI	D10.D0	TRUE	mmusculus
0.765	0.99603	-1.4295	SDE2	-1.82004	Spliceosome-C	D10.D3	TRUE	mmusculus
0.765	0.981827	1.91075	EMD	0.379868	emerin C25	D3.D0	FALSE	mmusculus
0.765	0.933975	-1.25522	GRPEL2	-0.0777301	PAM complex	D3.D0	TRUE	mmusculus
0.764	1.30784	-1.24055	TUBB	-0.198087	Tubulins	NPC.iPS	TRUE	hsapiens
0.764	1.33502	-1.45922	DEK	-1.76855	B-WICH	Neu.NPC	FALSE	hsapiens
0.764	0.776013	1.07645	ACTR1B	0.53338	RSC	DIV5.DIV1	TRUE	rnorvegicus
0.764	0.921216	-1.44608	POLR2E	-1.1926	PFD-like	D10.D3	FALSE	mmusculus
0.764	0.856835	0.839156	TRAPPC6B	0.848366	TRAPP complex	D10.D3	TRUE	mmusculus
0.763	0.707484	-1.40685	LSM8	-0.842154	emerin C25	DIV5.DIV1	TRUE	rnorvegicus
0.763	1.01904	-1.09639	HDAC1	-1.70856	CtBP	D10.D3	TRUE	mmusculus
0.763	0.901126	-0.598599	PPP2CB	-0.264342	RAF1-PPP2-PIN1 complex	D10.D3	TRUE	mmusculus
0.762	0.957375	1.98922	HSPA8	-0.021	Spliceosome-Prp19	DIV14.DIV5	TRUE	rnorvegicus
0.762	0.918196	-1.09179	HDAC1	-1.70856	NK-3-Groucho-HIPK2-SIN3A-RbpA48-HDAC1 complex	D10.D3	TRUE	mmusculus
0.761	1.87429	-1.03601	TUBAL3	0.10561	Tubulins	Neu.IPS	TRUE	hsapiens
0.761	1.38574	0.477211	AP2A1	1.12463	RalBP1-CCNB1-AP2A-NUMB-EPN1 complex	D10.D0	TRUE	mmusculus
0.761	0.963851	-1.34104	YEATS4	-1.35847	INO80.com	D10.D3	FALSE	mmusculus
0.761	1.00243	-1.73771	ACTL6A	-0.998055	BAF complex	D3.D0	TRUE	mmusculus
0.76	1.34109	-0.667123	GNAI3	0.129835	heterotrimeric G-protein complex	Neu.NPC	TRUE	hsapiens
0.76	1.22955	-0.134719	RAB13	0.044435	Sro1p/Sec4p/Sec9p complex	Neu.NPC	TRUE	hsapiens
0.76	1.43225	-1.04216	DDX20	-0.850611	Survival of motor neuron (SMN) complex	Neur.Stem	TRUE	drerio
0.76	1.42001	0.384996	GAPDH	-0.647812	HMGB1-HMGB2-HSC70-ERP60-GAPDH complex	D10.D0	TRUE	mmusculus
0.76	1.5315	-1.48422	NSMCE2	-1.58498	smc5p-Smc6p complex	D10.D0	FALSE	mmusculus
0.76	0.98652	-0.945978	SMARCA4	-1.21147	RSC	D10.D3	TRUE	mmusculus
0.76	0.969063	0.965651	MAGEE1	0.524996	smc5p-Smc6p complex	D10.D3	TRUE	mmusculus
0.759	1.34118	-1.31472	HDAC2	-1.12849	HCF-1N	NPC.iPS	TRUE	hsapiens
0.759	0.692779	1.42626	PRMT5	0.0720423	Flag-FCP1	DIV5.DIV1	FALSE	rnorvegicus
0.759	1.55586	-1.5714	RCOR2	-2.56079	COREST complex	D10.D0	TRUE	mmusculus
0.759	0.918701	-1.3558	NCBP2	-1.02222	Nuclear cap binding complex (NCBC)	D10.D3	FALSE	mmusculus
0.758	1.72683	-0.533844	PSIP1	-0.57389	ISW1b complex	Neu.IPS	TRUE	hsapiens
0.758	0.894723	-1.19158	PCID2	-1.48845	Sac3-Thp	D10.D3	FALSE	mmusculus
0.758	0.966478	-1.90837	HDAC1	-1.25844	ELL.com	D3.D0	TRUE	mmusculus
0.758	0.947796	1.85014	PPIG	0.49294	Spliceosome-C	D3.D0	TRUE	mmusculus
0.757	1.65015	1.15228	SSRP1	-0.934567	MMS22L-TONSL	Neu.IPS	TRUE	hsapiens
0.757	1.22622	0.266386	BANF1	-0.0370933	Emerin regulatory complex	Neu.NPC	TRUE	hsapiens
0.757	1.38525	1.12603	HDAC1	2.46655	HCF-1N	Neur.Stem	TRUE	drerio
0.757	1.37368	0.258282	GTF2B	1.03865	SMN-PolII-RHA complex	Neur.Stem	TRUE	drerio
0.757	1.3235	-1.38579	HDGF	-1.47095	emerin C52	DIV14.DIV1	TRUE	rnorvegicus
0.756	1.16509	1.54399	TUBA1B	0.321713	FIB-associated protein complex	NPC.iPS	TRUE	hsapiens
0.756	1.89087	-2.0687	G3BP1	-2.36568	emerin C25	Neu.IPS	TRUE	hsapiens
0.756	1.38719	-1.7655	NELFCD	-1.19555	Dsl1p complex	D10.D0	FALSE	mmusculus
0.755	1.24152	0.992813	GAPDH	0.615237	HMGB1-HMGB2-HSC70-ERP60-GAPDH complex	Neu.NPC	TRUE	hsapiens
0.754	1.00528	1.81707	HSPA5	0.353251	HCF-1N	D3.D0	TRUE	mmusculus
0.753	1.61963	-0.285902	HDGFRP2	0.0248317	ISW1b complex	Neu.IPS	FALSE	hsapiens
0.753	0.777979	1.55084	TMED3	0.781023	COPII	DIV5.DIV1	TRUE	rnorvegicus
0.753	1.51644	0.774524	STXBP5	1.4095	Sro1p/Sec4p/Sec9p complex	D10.D0	TRUE	mmusculus
0.753	0.896765	1.28379	POLR1E	0.249846	RNA polymerase I core complex	D10.D3	FALSE	mmusculus
0.752	1.34008	0.476488	TUBA1B	1.42391	Tubulins	Neu.NPC	TRUE	hsapiens
0.752	1.24131	1.65453	TP53BP1	1.64952	53BP1-containing complex	Neur.Stem	FALSE	drerio
0.752	0.876004	-1.2801	PHAX	-1.40698	CRM1-RAN-PHAX-CBC complex (cap binding complex)	D10.D3	FALSE	mmusculus
0.752	0.923771	-0.896247	SNAP23	-0.536496	Sro1p/Sec4p/Sec9p complex	D3.D0	TRUE	mmusculus
0.751	1.65411	0.456772	SIN3A	-1.30183	DNMT3B	Neu.IPS	TRUE	hsapiens
0.751	1.26627	0.828298	WDR5	0.358232	ELL.com	Neu.NPC	TRUE	hsapiens
0.751	1.14938	1.09021	TFAM	0.176344	INO80.com	DIV14.DIV1	TRUE	rnorvegicus
0.751	0.850021	-1.32889	HSP90AB1	-0.716471	P2X7 receptor signalling complex	D3.D0	TRUE	mmusculus
0.749	1.16382	1.20515	TBL3	0.36979	UTP B complex	NPC.iPS	TRUE	hsapiens
0.749	1.73959	1.04397	HNRNPU	-0.23401	emerin C24	Neu.IPS	TRUE	hsapiens
0.749	1.32241	-1.54969	ALYREF	-1.43527	Exon Junction Complex (EJC)	Neu.NPC	TRUE	hsapiens
0.749	0.8986	-1.66112	BCCIP	-1.351	emerin C25	DIV14.DIV5	FALSE	rnorvegicus
0.749	1.60637	-2.31419	MSI1	-2.62297	mRNA cleavage factor complex (CFI)	D10.D0	TRUE	mmusculus
0.749	0.997735	-2.84952	MED6	-1.64274	Mediator	D10.D3	FALSE	mmusculus
0.748	1.10336	1.45792	UBQLN1	0.89901	Ubiquilin-proteasome complex	NPC.iPS	TRUE	hsapiens
0.748	1.78693	-1.47924	ARID1A	-2.10979	BAF complex	Neu.IPS	TRUE	hsapiens
0.748	1.27875	1.8491	LSM7	1.705	Spliceosome-LSm	Neur.Stem	TRUE	drerio
0.748	0.75174	2.29227	DDX3X	0.355129	Large Drosha complex	DIV5.DIV1	TRUE	rnorvegicus
0.748	1.51031	-1.61535	H2AFX	-2.5435	H2AX complex; isolated from cells without IR exposure	D10.D0	FALSE	mmusculus
0.748	0.97549	1.16133	HSPA5	0.0445673	H2AX complex; isolated from cells without IR exposure	D10.D3	TRUE	mmusculus
0.747	1.30414	1.09662	ACTR1A	0.873545	RSC	DIV14.DIV1	TRUE	rnorvegicus
0.746	1.29286	1.6172	PDRG1	1.08387	Kinase maturation complex 1	NPC.iPS	FALSE	hsapiens
0.745	1.22197	-0.743133	RBBP7	-1.30345	ELL.com	Neu.NPC	TRUE	hsapiens
0.745	0.918095	2.01712	MRPL13	1.15	mitochondrial ribosomal large subunit	DIV14.DIV5	TRUE	rnorvegicus
0.744	1.6558	1.4624	PFDN2	1.36462	PFD-like	Neu.IPS	FALSE	hsapiens
0.744	0.681018	1.21229	MYBBP1A	-0.0121138	B-WICH	DIV5.DIV1	FALSE	rnorvegicus
0.743	1.82327	-1.02203	NASP	-2.67069	H3.3 com	Neu.IPS	FALSE	hsapiens
0.743	1.30765	2.02659	PRKDC	0.739913	DNA-PK-Ku-eIF2-NF90-NF45 complex	Neu.NPC	TRUE	hsapiens
0.743	0.657174	0.820839	EIF2S2	0.228326	DNA-PK-Ku-eIF2-NF90-NF45 complex	DIV5.DIV1	FALSE	rnorvegicus
0.743	0.856857	1.37426	WDR77	0.104171	Flag-FCP1	D10.D3	TRUE	mmusculus
0.743	0.907866	1.21057	GNB4	1.97253	heterotrimeric G-protein complex	D3.D0	TRUE	mmusculus
0.742	1.22296	1.52003	NUP98	0.93934	Nuclear pore complex (NPC)	NPC.iPS	FALSE	hsapiens
0.742	1.33338	-1.15972	NASP	-2.00968	H3.3 com	Neu.NPC	FALSE	hsapiens
0.742	1.32894	1.84273	EIF1	0.46827	multi-eIF complex	Neu.NPC	TRUE	hsapiens
0.741	1.70987	1.30429	CPSF7	0.799577	CF IIAm complex (Cleavage factor IIAm complex)	Neu.IPS	TRUE	hsapiens
0.741	1.3582	2.41889	NUP160	0.908865	Nuclear pore complex (NPC)	Neu.NPC	FALSE	hsapiens
0.741	0.844787	1.27628	SKP1A	-0.257808	p27-cyclinE-Cdk2 - Ubiquitin E3 ligase (SKP1A; SKP2; CUL1; CKS1B; RBX1) complex	D3.D0	FALSE	mmusculus
0.74	1.23085	0.993962	TRRAP	1.87712	STAGA complex	Neur.Stem	TRUE	drerio
0.739	1.3707	0.773371	ABI1	1.55552	Wave-2 complex	D10.D0	TRUE	mmusculus
0.739	0.834618	0.380238	NCKAP1	0.884269	Wave-2 complex	D10.D3	TRUE	mmusculus
0.739	0.908931	2.19235	ATAD3A	-0.14384	NuA4/Tip60 HAT complex	D10.D3	FALSE	mmusculus
0.738	1.68704	-1.3035	ACTN4	-1.76813	P2X7 receptor signalling complex	Neu.IPS	TRUE	hsapiens
0.738	1.37299	1.08179	TOP2A	0.30976	H3.3 com	Neu.NPC	TRUE	hsapiens
0.738	1.29403	1.9804	UQCRFS1	2.2786	Cytochrome bc1 complex (Ubiquinol-cytochrome c reductase complex; complex III)	Neu.NPC	FALSE	hsapiens
0.738	1.20447	-0.236989	PRMT5	0.222945	FIB-associated protein complex	DIV14.DIV1	FALSE	rnorvegicus
0.738	0.85931	1.49409	PPP2CA	0.941078	RAF1-PPP2-PIN1 complex	D3.D0	TRUE	mmusculus
0.737	1.80971	-1.44657	UBQLN2	0.532485	H+transporting ATPase; vacuolar	Neu.IPS	TRUE	hsapiens
0.737	0.903273	-2.23541	PPME1	-0.329	mitochondrial ribosomal small subunit	DIV14.DIV5	FALSE	rnorvegicus
0.737	0.855857	-0.581607	SAFB	-0.672	eIF3	DIV14.DIV5	TRUE	rnorvegicus
0.737	1.37551	0.777903	BRK1	1.56193	Wave-2 complex	D10.D0	FALSE	mmusculus
0.737	0.951093	-1.85094	BCCIP	-1.42419	emerin C25	D3.D0	FALSE	mmusculus
0.736	0.896435	-1.08678	SPCS2	-1.06537	signal peptidase complex	D10.D3	FALSE	mmusculus
0.735	1.1704	1.15233	COX7C	0.4198	Cytochrome c oxidase (complex IV)	NPC.iPS	FALSE	hsapiens
0.735	0.921	-1.5038	GNL3L	-1.373	Yph1-L	DIV14.DIV5	TRUE	rnorvegicus
0.735	0.940686	-1.43526	ARID4B	-1.90127	SIN3 complex	D10.D3	TRUE	mmusculus
0.735	0.8882	-1.07666	SMARCA5	-1.55376	DNMT3B	D10.D3	TRUE	mmusculus
0.735	0.940364	-3.22298	PSMD10	-1.49527	26S Proteasome	D3.D0	TRUE	mmusculus
0.734	1.16279	-0.636068	TAF5L	0.262313	STAGA complex	Neur.Stem	TRUE	drerio
0.734	1.49777	-1.37477	PXN	-1.46543	Polycystin-1 multiprotein complex (ACTN1; CDH1; SRC; JUP; VCL; CTNNB1; PXN; BCAR1; PKD1; PTK2; TLN1)	D10.D0	TRUE	mmusculus
0.734	1.36532	1.42944	AK6	-0.555738	TFIID complex	D10.D0	TRUE	mmusculus
0.734	0.976355	-2.21391	RPL11	-0.52517	mitochondrial ribosomal large subunit	D3.D0	FALSE	mmusculus
0.733	0.690434	-1.71114	PRMT1	-0.682351	FIB-associated protein complex	DIV5.DIV1	TRUE	rnorvegicus
0.732	1.3604	2.5124	FAU	1.03616	cytoplasmic ribosomal small subunit	Neu.NPC	FALSE	hsapiens
0.732	1.26375	2.17049	GNL2	0.511835	Yph1-L	DIV14.DIV1	TRUE	rnorvegicus
0.732	0.856571	1.51514	POLR2I	-0.066	RNA polymerase II core complex	DIV14.DIV5	TRUE	rnorvegicus
0.732	0.917345	1.34126	ATP6V0D1	1.41039	H+transporting ATPase; vacuolar	D3.D0	TRUE	mmusculus
0.731	1.31594	-0.0714331	DDX5	2.25384	Large Drosha complex	Neur.Stem	TRUE	drerio
0.731	0.817	0.532179	XRCC5	0.018	Rap1 complex	DIV14.DIV5	TRUE	rnorvegicus
0.731	0.833902	-0.762908	CDK2	-0.845672	p27-cyclinE-Cdk2 - Ubiquitin E3 ligase (SKP1A; SKP2; CUL1; CKS1B; RBX1) complex	D10.D3	TRUE	mmusculus
0.731	0.832165	-0.746997	TRAPPC5	-0.287294	TRAPP complex	D10.D3	FALSE	mmusculus
0.73	1.668	0.266896	POLR2B	0.246673	RNA polymerase II core complex	Neu.IPS	TRUE	hsapiens
0.73	1.36604	-2.08575	KARS	-1.15451	multi-tRNAsynthase complex	Neu.NPC	FALSE	hsapiens
0.73	0.846099	1.32924	KIF11	0.0113956	2A-DUB	D10.D3	TRUE	mmusculus
0.73	0.879581	-1.41053	CTDP1	-1.27683	Flag-FCP1	D3.D0	FALSE	mmusculus
0.73	0.932058	1.1931	TMED9	0.81095	COPII	D3.D0	TRUE	mmusculus
0.729	1.54433	-0.84312	RPA1	-1.17488	53BP1-containing complex	Neu.IPS	FALSE	hsapiens
0.729	1.34161	0.331721	SPTAN1	-0.439493	emerin	Neu.NPC	TRUE	hsapiens
0.729	1.01461	0.0270531	CDK1	0.0094905	Cdc28p/Clb5p complex	Neur.Stem	TRUE	drerio
0.729	0.81925	-1.48696	HIST1H1A	-1.346	Emerin regulatory complex	DIV14.DIV5	FALSE	rnorvegicus
0.729	0.832	1.14654	PPP2R5A	0.601	HDAC1-PP1	DIV14.DIV5	TRUE	rnorvegicus
0.729	0.931401	1.25471	CDK8	-0.112744	HES1 promoter-Notch enhancer complex	D10.D3	TRUE	mmusculus
0.728	1.72843	1.33589	ACTR1A	1.61878	RSC	Neu.IPS	TRUE	hsapiens
0.727	1.35152	-0.979451	YWHAQA	-0.291592	Kinase maturation complex 1	Neur.Stem	TRUE	drerio
0.727	0.847849	-1.34129	CLIP3	-0.113592	dynactin complex	D10.D3	TRUE	mmusculus
0.727	0.958304	-2.16641	RPL23	-0.505036	mitochondrial ribosomal large subunit	D3.D0	FALSE	mmusculus
0.727	0.888681	1.15062	PPP2CA	0.941078	protein phosphatase type 2A complex (Rts1p)	D3.D0	TRUE	mmusculus
0.726	0.890429	-0.00533941	EIF3J	0.07	eIF3	DIV14.DIV5	FALSE	rnorvegicus
0.725	1.22802	2.39862	RALY	1.34276	Large Drosha complex	NPC.iPS	TRUE	hsapiens
0.725	1.18866	-0.114424	PFN1	-0.405043	Profilin 1 complex	Neu.NPC	TRUE	hsapiens
0.725	0.83	-1.14379	HDAC2	-0.784	HDAC1-PP1	DIV14.DIV5	TRUE	rnorvegicus
0.725	0.698329	-1.35161	LSM8	-0.842154	emerin C52	DIV5.DIV1	TRUE	rnorvegicus
0.725	0.917875	-1.19791	PPME1	-0.446319	mitochondrial ribosomal small subunit	D3.D0	FALSE	mmusculus
0.724	1.25409	-0.0899937	MYH9	-1.04507	emerin	Neu.NPC	TRUE	hsapiens
0.724	1.25453	1.52429	DDX39AB	2.82265	Transcription-export (TREX) complex	Neur.Stem	TRUE	drerio
0.724	0.904416	0.797598	STXBP5	0.848247	Sro1p/Sec4p/Sec9p complex	D10.D3	TRUE	mmusculus
0.724	0.895301	0.858173	WDR59	0.331444	chromatin assembly complex	D3.D0	TRUE	mmusculus
0.723	1.343	0.833886	PARP2	1.75788	H3.3 com	Neur.Stem	TRUE	drerio
0.722	1.26011	1.38932	ARFGAP2	0.927112	COPI	NPC.iPS	TRUE	hsapiens
0.722	1.03746	-1.05584	RAB10	-0.499433	Sro1p/Sec4p/Sec9p complex	NPC.iPS	TRUE	hsapiens
0.722	1.24727	0.931264	TUBB	0.65236	2A-DUB	Neu.NPC	TRUE	hsapiens
0.722	1.22955	-0.49701	LLGL1	-0.564273	Sro1p/Sec4p/Sec9p complex	Neu.NPC	TRUE	hsapiens
0.722	1.19997	0.0685185	XRCC5	-0.289153	Rap1 complex	Neu.NPC	TRUE	hsapiens
0.722	1.32106	-1.20168	CCNA2	-0.294367	RC complex during S-phase of cell cycle	Neur.Stem	TRUE	drerio
0.721	1.28892	0.555066	HNRNPUB	3.20254	Large Drosha complex	Neur.Stem	TRUE	drerio
0.721	0.901942	-1.48931	GNAI3	-0.395161	heterotrimeric G-protein complex	D10.D3	TRUE	mmusculus
0.721	0.883222	-0.782578	TLN1	-1.17791	Polycystin-1 multiprotein complex (ACTN1; CDH1; SRC; JUP; VCL; CTNNB1; PXN; BCAR1; PKD1; PTK2; TLN1)	D3.D0	TRUE	mmusculus
0.72	1.59839	-0.321093	HDGF	-0.0601467	ISW1b complex	Neu.IPS	TRUE	hsapiens
0.72	0.877872	-1.1999	TUBA1A	0.543492	Tubulins	D10.D3	TRUE	mmusculus
0.72	0.883671	1.0704	ILF2	0.143778	DNA-PK-Ku-eIF2-NF90-NF45 complex	D3.D0	TRUE	mmusculus
0.719	1.24739	-0.061976	EMD	-1.00484	emerin	Neu.NPC	FALSE	hsapiens
0.719	1.23237	-0.501201	RAB8B	-0.571315	Sro1p/Sec4p/Sec9p complex	Neu.NPC	TRUE	hsapiens
0.719	1.30502	0.953157	CPSF6	2.51911	CF IIAm complex (Cleavage factor IIAm complex)	Neur.Stem	FALSE	drerio
0.719	1.18138	0.989941	HDAC1	2.46655	CtBP	Neur.Stem	TRUE	drerio
0.719	1.2054	-0.458313	SSRP1A	1.21686	Toposome	Neur.Stem	TRUE	drerio
0.719	1.19676	-1.57553	ELP4	-1.49216	Elongator complex	Neur.Stem	FALSE	drerio
0.719	1.49307	1.36211	ACTG1	0.965732	INO80.com	D10.D0	TRUE	mmusculus
0.719	0.922879	-0.861933	SMARCC2	-1.13047	RSC	D10.D3	TRUE	mmusculus
0.718	1.23929	0.790913	ATP6V0D1	2.7029	H+transporting ATPase; vacuolar	DIV14.DIV1	TRUE	rnorvegicus
0.718	1.38805	1.03123	CAPZA2	0.845791	RICH1/AMOT polarity complex; Flag-Rich1 precipitated	D10.D0	TRUE	mmusculus
0.718	0.820951	-0.0789856	GAPDH	-1.04194	HMGB1-HMGB2-HSC70-ERP60-GAPDH complex	D3.D0	TRUE	mmusculus
0.717	1.14497	-0.903334	RPA3	-1.61298	RC complex during S-phase of cell cycle	NPC.iPS	FALSE	hsapiens
0.717	1.69315	1.97147	AIMP2	0.469077	multi-tRNAsynthase complex	Neu.IPS	FALSE	hsapiens
0.717	1.23804	-1.78256	CD2BP2	-1.31262	Spliceosome-U5	Neu.NPC	FALSE	hsapiens
0.716	1.14442	-1.07416	EIF4G2A	-0.0685136	eIF4F	Neur.Stem	TRUE	drerio
0.716	1.43174	1.98603	MED26	-0.0610081	AF4.com	D10.D0	FALSE	mmusculus
0.716	1.36689	-1.02069	MCM6	-2.92646	emerin C24	D10.D0	TRUE	mmusculus
0.716	0.897874	-0.799053	ZEB2	-1.46881	CtBP	D10.D3	TRUE	mmusculus
0.716	0.859709	0.585576	CAPZA2	0.0870321	RICH1/AMOT polarity complex; Flag-Rich1 precipitated	D3.D0	TRUE	mmusculus
0.715	1.46229	-1.29149	CUL1	-1.12985	PFD-like	Neu.IPS	TRUE	hsapiens
0.715	1.26749	-0.582373	GNAI2	0.258643	heterotrimeric G-protein complex	Neu.NPC	TRUE	hsapiens
0.715	1.18318	-0.168433	C1QBP	0.350691	FIB-associated protein complex	DIV14.DIV1	FALSE	rnorvegicus
0.715	0.818714	-0.46991	TUBB6	-0.072	Tubulins	DIV14.DIV5	TRUE	rnorvegicus
0.714	1.10664	0.559057	RBM25	-0.0298033	B-WICH	NPC.iPS	FALSE	hsapiens
0.714	1.16445	-0.446526	MRE11A	-0.99801	Rap1 complex	Neu.NPC	FALSE	hsapiens
0.714	1.2953	-0.492204	RPA1	-0.933213	RC complex during S-phase of cell cycle	Neu.NPC	FALSE	hsapiens
0.714	1.22331	-1.67862	SUPT16H	-1.7215	H2AX complex; isolated from cells without IR exposure	DIV14.DIV1	FALSE	rnorvegicus
0.714	0.79067	0.890241	GAPDH	0.394125	HMGB1-HMGB2-HSC70-ERP60-GAPDH complex	D10.D3	TRUE	mmusculus
0.713	1.12583	0.600449	BAZ1B	0.0181667	B-WICH	NPC.iPS	TRUE	hsapiens
0.713	1.18514	-1.47923	BCKDK	0.172781	mitochondrial pyruvate dehydrogenase complex	DIV14.DIV1	TRUE	rnorvegicus
0.713	0.861143	-1.51933	IQGAP1	-1.28	emerin C52	DIV14.DIV5	TRUE	rnorvegicus
0.713	0.661985	-1.59995	ACTL6A	-1.07386	Sin3-CI	DIV5.DIV1	TRUE	rnorvegicus
0.713	0.839267	-1.44035	TBP	-1.71291	SMN-PolII-RHA complex	D10.D3	TRUE	mmusculus
0.713	0.867866	1.4177	ATAD3A	0.683687	SRCAP	D3.D0	FALSE	mmusculus
0.713	0.928189	-2.08056	RPL8	-0.468647	mitochondrial ribosomal large subunit	D3.D0	TRUE	mmusculus
0.713	0.868825	1.20987	SIN3A	-0.622221	DNMT3B	D3.D0	TRUE	mmusculus
0.712	1.10966	1.09576	EIF5	0.69746	multi-eIF complex	NPC.iPS	FALSE	hsapiens
0.712	1.20575	1.2625	CKB	0.742142	emerin C52	DIV14.DIV1	TRUE	rnorvegicus
0.712	0.602972	-1.24137	GTF2F1	-0.964559	Flag-FCP1	DIV5.DIV1	FALSE	rnorvegicus
0.712	0.816564	1.62106	TIMM17B	0.0185567	mitochondrial inner membrane presequence translocase complex	D10.D3	TRUE	mmusculus
0.711	1.23254	1.30284	C1QBP	0.15419	emerin C24	Neu.NPC	FALSE	hsapiens
0.711	0.817571	-0.465931	TUBA1A	-0.068	Tubulins	DIV14.DIV5	TRUE	rnorvegicus
0.711	0.646362	0.876232	MPP3	0.617581	P2X7 receptor signalling complex	DIV5.DIV1	TRUE	rnorvegicus
0.711	0.89826	-1.22387	VAMP3	0.0155884	SNARE complex	D10.D3	TRUE	mmusculus
0.711	0.833242	0.0284899	RALBP1	-0.0426165	RalBP1-CCNB1-AP2A-NUMB-EPN1 complex	D3.D0	FALSE	mmusculus
0.71	1.18866	0.273829	HSPA8	0.106823	Profilin 1 complex	Neu.NPC	TRUE	hsapiens
0.71	1.28033	-0.797499	ATP6V1F	0.844887	H+transporting ATPase; vacuolar	Neu.NPC	FALSE	hsapiens
0.71	1.49399	-1.24057	SMARCC1	-1.90814	RSC	D10.D0	TRUE	mmusculus
0.71	0.883156	-0.782465	VCL	-1.1778	Polycystin-1 multiprotein complex (ACTN1; CDH1; SRC; JUP; VCL; CTNNB1; PXN; BCAR1; PKD1; PTK2; TLN1)	D3.D0	TRUE	mmusculus
0.71	0.890722	1.11317	ERGIC3	0.755835	COPII	D3.D0	TRUE	mmusculus
0.709	1.28523	1.11959	ACTB	0.49459	BAF complex	Neu.NPC	TRUE	hsapiens
0.709	1.25154	-1.41063	G3BP1	-1.728	emerin C25	Neu.NPC	TRUE	hsapiens
0.709	1.14413	-0.775374	XRCC6	-0.71463	53BP1-containing complex	Neu.NPC	TRUE	hsapiens
0.708	1.72056	-2.13674	WDR12	-2.81229	Yph1-L	Neu.IPS	TRUE	hsapiens
0.708	0.886846	-1.43874	BOP1	-1.336	Yph1-L	DIV14.DIV5	FALSE	rnorvegicus
0.708	0.893819	-1.5381	CCNT1	-1.65895	AF4.com	D10.D3	TRUE	mmusculus
0.707	1.24312	1.01277	ACTB	0.98403	INO80.com	Neu.NPC	TRUE	hsapiens
0.707	0.838125	-1.74145	PQBP1	-1.617	Spliceosome-Prp19	DIV14.DIV5	TRUE	rnorvegicus
0.707	0.832	1.14654	PPP1R10	0.601	HDAC1-PP1	DIV14.DIV5	TRUE	rnorvegicus
0.706	1.1707	0.951087	PRPF19	0.815123	Spliceosome-Prp19	Neu.NPC	TRUE	hsapiens
0.706	0.82101	-1.32524	HCFC1	-0.738841	hMOF	D3.D0	TRUE	mmusculus
0.705	1.18386	-2.27397	ARID1A	-0.926975	BAF complex	NPC.iPS	TRUE	hsapiens
0.705	1.10824	-1.41442	VCL	-1.5228	Polycystin-1 multiprotein complex (ACTN1; CDH1; SRC; JUP; VCL; CTNNB1; PXN; BCAR1; PKD1; PTK2; TLN1)	NPC.iPS	TRUE	hsapiens
0.705	0.866679	1.03683	PPP2R5A	0.612807	protein phosphatase type 2A complex (Rts1p)	D10.D3	TRUE	mmusculus
0.704	1.63406	1.80549	PRPF19	1.11198	Spliceosome-Prp19	Neu.IPS	TRUE	hsapiens
0.703	1.18073	-1.06926	C1QBP	-0.771293	emerin C52	NPC.iPS	FALSE	hsapiens
0.703	1.12505	0.663781	POLR2B	0.746283	RNA polymerase II core complex	NPC.iPS	TRUE	hsapiens
0.703	1.69803	-1.66167	DAZAP1	-1.45145	mRNA cleavage factor complex (CFI)	Neu.IPS	TRUE	hsapiens
0.703	0.625822	1.6649	EIF2B4	0.796064	eIF2B	DIV5.DIV1	TRUE	rnorvegicus
0.702	1.20858	-0.539036	SNX6	-0.165807	retromer complex	Neu.NPC	TRUE	hsapiens
0.702	1.19918	1.23195	HDAC1	2.46655	DNMT3B	Neur.Stem	TRUE	drerio
0.702	0.862778	1.48745	GNAZ	1.461	heterotrimeric G-protein complex	DIV14.DIV5	TRUE	rnorvegicus
0.702	0.67013	-1.50985	SNX1	-0.403897	retromer complex	DIV5.DIV1	TRUE	rnorvegicus
0.702	0.924294	0.35731	HSPA5	0.0445673	RSC	D10.D3	TRUE	mmusculus
0.702	0.911581	1.83845	SIN3A	-0.234054	Sin3-CI	D10.D3	TRUE	mmusculus
0.702	0.794006	0.896519	HSPA8	0.398573	HMGB1-HMGB2-HSC70-ERP60-GAPDH complex	D10.D3	TRUE	mmusculus
0.702	0.780319	1.09754	SLIT2	1.64459	SPB components	D3.D0	TRUE	mmusculus
0.701	0.907619	1.9918	MRPL22	1.139	mitochondrial ribosomal large subunit	DIV14.DIV5	FALSE	rnorvegicus
0.701	1.4166	-1.75062	TAF9	-2.35295	STAGA complex	D10.D0	TRUE	mmusculus
0.701	1.3033	1.58972	MAP2K1	1.37087	STE5-MAPK complex	D10.D0	TRUE	mmusculus
0.701	0.873034	-1.04422	SPCS3	-1.03612	signal peptidase complex	D10.D3	TRUE	mmusculus
0.701	0.831784	-0.379002	CHAF1A	-0.697294	chromatin assembly complex	D3.D0	FALSE	mmusculus
0.701	0.811071	1.03557	PAM16	1.56328	mitochondrial inner membrane presequence translocase complex	D3.D0	TRUE	mmusculus
0.701	0.883362	1.06987	ILF3	0.143408	DNA-PK-Ku-eIF2-NF90-NF45 complex	D3.D0	TRUE	mmusculus
0.7	0.664372	1.98286	CLUH	0.351409	eIF3	DIV5.DIV1	FALSE	rnorvegicus
0.7	0.918468	0.340385	HSPA13	0.0282555	RSC	D10.D3	TRUE	mmusculus
0.7	0.900728	1.25674	ATRX	0.13935	H3.3 com	D3.D0	TRUE	mmusculus
0.7	0.819947	1.24375	CBX5	0.382908	Suv39h1	D3.D0	TRUE	mmusculus
0.699	1.48177	1.41363	PPME1	0.665443	mitochondrial ribosomal small subunit	Neu.IPS	FALSE	hsapiens
0.699	1.09905	-0.0936102	PRPF8	1.64229	Toposome	Neur.Stem	FALSE	drerio
0.699	1.4478	1.91229	NOTCH1	-0.156697	HES1 promoter-Notch enhancer complex	D10.D0	TRUE	mmusculus
0.699	0.856142	0.639189	ACTG1	0.473211	emerin	D10.D3	TRUE	mmusculus
0.699	0.881324	-1.84019	ACTL6A	-0.998055	NuA4/Tip60 HAT complex	D3.D0	TRUE	mmusculus
0.699	0.838154	-0.298778	MPP5	-0.675231	RICH1/AMOT polarity complex; Flag-Rich1 precipitated	D3.D0	TRUE	mmusculus
0.698	0.906157	-1.1334	HAT1	-1.45951	H3.3 com	D3.D0	FALSE	mmusculus
0.698	0.87154	1.75319	CALR	0.46406	H2AX complex; isolated from cells without IR exposure	D3.D0	TRUE	mmusculus
0.698	0.811071	1.03557	GM9803	1.56328	mitochondrial inner membrane presequence translocase complex	D3.D0	TRUE	mmusculus
0.698	0.850036	1.17062	SMARCA5	-0.645706	DNMT3B	D3.D0	TRUE	mmusculus
0.697	1.06627	0.772462	SF3B3	1.65769	STAGA complex	Neur.Stem	TRUE	drerio
0.697	0.592565	-1.73078	TRAPPC4	-0.423546	TRAPP complex	DIV5.DIV1	TRUE	rnorvegicus
0.697	1.30081	0.575749	NCKAP1	1.27597	Wave-2 complex	D10.D0	TRUE	mmusculus
0.697	0.901748	2.02563	CDK8	-0.112744	RNA polymerase II complex; chromatin structure modifying	D10.D3	TRUE	mmusculus
0.697	0.8002	1.16933	XPO1	-0.0660146	CRM1-RAN-PHAX-CBC complex (cap binding complex)	D10.D3	TRUE	mmusculus
0.696	1.06489	-1.16458	PRPF8	-0.607807	Spliceosome-U5	NPC.iPS	FALSE	hsapiens
0.696	1.0225	0.969886	KDM1A	0.907937	ELL.com	NPC.iPS	TRUE	hsapiens
0.696	0.67488	1.95518	IPO4	-0.0120274	H3.3 com	DIV5.DIV1	TRUE	rnorvegicus
0.696	0.870279	-0.970063	RAB8A	-0.477124	Sro1p/Sec4p/Sec9p complex	D10.D3	TRUE	mmusculus
0.696	0.899628	1.30131	ATP6V0A1	1.38736	H+transporting ATPase; vacuolar	D3.D0	TRUE	mmusculus
0.695	0.7545	-1.68413	SEC11A	-0.431	signal peptidase complex	DIV14.DIV5	TRUE	rnorvegicus
0.695	0.884375	-0.893375	SMC6	-0.910231	smc5p-Smc6p complex	D10.D3	TRUE	mmusculus
0.694	1.5865	-1.23787	ACTG1	-1.7031	emerin	Neu.IPS	TRUE	hsapiens
0.694	1.30678	1.51334	ACTR1A	1.03095	RSC	Neu.NPC	TRUE	hsapiens
0.694	1.15412	0.562685	POLR2L	0.43877	RNA polymerase II core complex	Neu.NPC	TRUE	hsapiens
0.694	1.01461	-0.24087	CCNA2	-0.294367	Cdc28p/Clb5p complex	Neur.Stem	TRUE	drerio
0.694	1.18373	-0.73946	ATP6V0C	0.991873	H+transporting ATPase; vacuolar	DIV14.DIV1	TRUE	rnorvegicus
0.694	1.18968	-0.147485	TUBA1A	0.389724	FIB-associated protein complex	DIV14.DIV1	TRUE	rnorvegicus
0.694	1.11484	1.66739	TNKS1BP1	0.446362	CCR4-NOT complex	DIV14.DIV1	TRUE	rnorvegicus
0.694	0.612382	0.894126	XRN1	0.270561	RNA Degradation Complex	DIV5.DIV1	TRUE	rnorvegicus
0.694	0.866904	1.82257	ATAD3A	-0.14384	SRCAP	D10.D3	FALSE	mmusculus
0.694	0.780829	0.218632	TAF10	-0.789324	TFIID complex	D10.D3	FALSE	mmusculus
0.693	1.17455	-1.0825	TUBB8	-0.0481283	Tubulins	NPC.iPS	TRUE	hsapiens
0.693	0.817571	-0.214251	TUBB2B	0.185	Tubulins	DIV14.DIV5	TRUE	rnorvegicus
0.693	1.43924	1.47139	CALR	0.0801549	H2AX complex; isolated from cells without IR exposure	D10.D0	TRUE	mmusculus
0.693	1.32987	1.08891	PRKAR1B	2.15108	cAMP-dependent protein kinase	D10.D0	TRUE	mmusculus
0.693	0.850748	-1.13756	SNAP23	0.0710195	SNARE complex	D10.D3	TRUE	mmusculus
0.692	1.6313	-1.24608	ACTG1	-1.7031	P2X7 receptor signalling complex	Neu.IPS	TRUE	hsapiens
0.692	1.23136	0.632828	SNRPG	1.15853	Survival of motor neuron (SMN) complex	Neur.Stem	TRUE	drerio
0.691	1.17479	0.966144	AIMP1	-0.27467	multi-tRNAsynthase complex	NPC.iPS	FALSE	hsapiens
0.691	1.428	0.893742	SUPT16H	-1.23076	MMS22L-TONSL	Neu.IPS	FALSE	hsapiens
0.691	1.34326	-0.856235	CSTF2	1.64307	mRNA cleavage factor complex (CFI)	Neur.Stem	TRUE	drerio
0.691	1.06421	-0.758667	PAK3	0.406948	Cdc42p/Ste20p complex	DIV14.DIV1	TRUE	rnorvegicus
0.691	0.87993	0.348508	SRC	-0.114391	Polycystin-1 multiprotein complex (ACTN1; CDH1; SRC; JUP; VCL; CTNNB1; PXN; BCAR1; PKD1; PTK2; TLN1)	D3.D0	TRUE	mmusculus
0.691	0.88057	-1.37608	HDAC1	-1.25844	CtBP	D3.D0	TRUE	mmusculus
0.69	1.21865	-1.21792	SEC23A	-0.796075	COPII	Neu.NPC	TRUE	hsapiens
0.69	1.2988	-0.79183	GEMIN4	-0.550338	Survival of motor neuron (SMN) complex	Neur.Stem	FALSE	drerio
0.69	0.924216	1.21167	YWHAE	0.417306	emerin C25	D10.D3	TRUE	mmusculus
0.689	0.675139	-1.51879	RPS15	-0.2296	mitochondrial ribosomal small subunit	DIV5.DIV1	TRUE	rnorvegicus
0.689	0.794007	0.183928	AP2A1	0.114324	RalBP1-CCNB1-AP2A-NUMB-EPN1 complex	D3.D0	TRUE	mmusculus
0.689	0.795226	-1.06093	EIF4A1	-1.03327	eIF4F	D3.D0	TRUE	mmusculus
0.688	1.59668	0.622352	TUBB2B	2.6664	Tubulins	Neu.IPS	TRUE	hsapiens
0.688	1.28306	1.15878	TMED4	1.31781	COPII	Neu.NPC	TRUE	hsapiens
0.688	1.21981	-0.495511	STRAP	-0.194906	Survival of motor neuron (SMN) complex	Neur.Stem	FALSE	drerio
0.688	1.41461	-1.16451	ACTL6A	-1.82266	RSC	D10.D0	TRUE	mmusculus
0.688	1.34295	-0.980974	AP3B1	-0.611981	AP-3 adaptor complex	D10.D0	TRUE	mmusculus
0.688	1.41584	1.80509	MBD2	-0.139075	NuRD complex	D10.D0	TRUE	mmusculus
0.688	0.815102	-1.22828	LSM7	-1.49572	Spliceosome-LSm	D10.D3	TRUE	mmusculus
0.688	0.899934	-1.22433	PHC2	-0.989706	Polycomb-group repressive complex 1 (PRC1)	D3.D0	TRUE	mmusculus
0.688	0.811435	-1.72638	CDK8	-1.16088	Kornberg's mediator (SRB) complex	D3.D0	TRUE	mmusculus
0.687	1.43867	-0.637676	ARF3	-0.47227	Chs5p/Arf-1binding proteins (ChAPs)	Neu.IPS	TRUE	hsapiens
0.687	0.767186	-0.385193	DYNC1H1	0.146103	cytoplasmic dynein complex	D3.D0	TRUE	mmusculus
0.686	1.10656	-1.49927	VPS35	-0.32834	retromer complex	NPC.iPS	FALSE	hsapiens
0.686	1.09995	-0.448135	PDIA3	-0.826293	HMGB1-HMGB2-HSC70-ERP60-GAPDH complex	Neu.NPC	TRUE	hsapiens
0.686	0.771	-0.171615	MAP3K3	0.193	STE5-MAPK complex	DIV14.DIV5	TRUE	rnorvegicus
0.686	0.881607	-1.30989	TAF12	-1.60794	STAGA complex	D10.D3	FALSE	mmusculus
0.686	0.845232	0.797069	MGA	-0.314427	E2F6.com-1	D10.D3	TRUE	mmusculus
0.685	0.93173	2.98481	RPS27A	0.580888	cytoplasmic ribosomal large subunit	D3.D0	TRUE	mmusculus
0.684	1.19702	-0.701397	TOP2A	-1.24948	H3.3 com	NPC.iPS	TRUE	hsapiens
0.684	1.08518	0.855589	KDM1A	2.33828	CtBP	Neur.Stem	TRUE	drerio
0.684	0.605706	-0.461281	GNB1	0.714836	heterotrimeric G-protein complex	DIV5.DIV1	TRUE	rnorvegicus
0.684	1.41146	-0.811011	RAB8B	-0.70034	Sro1p/Sec4p/Sec9p complex	D10.D0	TRUE	mmusculus
0.684	0.928718	1.11855	NAA38	0.292323	emerin C52	D10.D3	FALSE	mmusculus
0.684	0.841743	-1.71722	ILF3	-1.10409	DNA-PK-Ku-eIF2-NF90-NF45 complex	D10.D3	TRUE	mmusculus
0.683	1.14259	-0.857377	PFN1	-0.366113	Profilin 1 complex	NPC.iPS	TRUE	hsapiens
0.683	1.12361	1.22814	BAZ1B	0.280313	B-WICH	Neu.NPC	TRUE	hsapiens
0.683	0.7872	-1.70749	TCEA1	-1.056	AF4.com	DIV14.DIV5	TRUE	rnorvegicus
0.682	1.131	-0.927317	HSPA2	-1.0634	HMC Complex	NPC.iPS	TRUE	hsapiens
0.682	1.08055	-1.59925	GTF2F1	-1.18489	Flag-FCP1	Neu.NPC	FALSE	hsapiens
0.682	1.0936	-0.240627	XRCC6	-0.71463	Rap1 complex	Neu.NPC	TRUE	hsapiens
0.682	1.17207	0.874557	HSPA13	0.65894	RSC	DIV14.DIV1	TRUE	rnorvegicus
0.682	0.7495	-1.21994	DDX41	-1.263	Spliceosome-C	DIV14.DIV5	TRUE	rnorvegicus
0.682	1.42762	-1.28146	GNAI3	0.358329	heterotrimeric G-protein complex	D10.D0	TRUE	mmusculus
0.682	0.885101	-0.7776	CKB	-0.966219	emerin C52	D3.D0	TRUE	mmusculus
0.682	0.811458	-1.63251	GTF2B	-1.17878	SMN-PolII-RHA complex	D3.D0	TRUE	mmusculus
0.681	1.00557	-1.17844	PSIP1	-0.28073	ISW1b complex	NPC.iPS	TRUE	hsapiens
0.681	0.641466	-0.981998	TLN1	-0.744678	Polycystin-1 multiprotein complex (ACTN1; CDH1; SRC; JUP; VCL; CTNNB1; PXN; BCAR1; PKD1; PTK2; TLN1)	DIV5.DIV1	TRUE	rnorvegicus
0.681	0.686652	-1.46133	GNL3	-0.915174	Yph1-L	DIV5.DIV1	TRUE	rnorvegicus
0.681	0.788276	1.02714	KIF4	-0.208298	DNMT3B	D10.D3	TRUE	mmusculus
0.68	1.10664	-0.013426	SF3B1	-0.693253	B-WICH	NPC.iPS	FALSE	hsapiens
0.68	1.04591	0.857426	HNRNPU	-0.11415	emerin C24	NPC.iPS	TRUE	hsapiens
0.68	1.02353	1.19948	HDGFRP3	1.34255	ISW1b complex	NPC.iPS	FALSE	hsapiens
0.68	1.64184	-0.810219	TUBB	0.454273	Tubulins	Neu.IPS	TRUE	hsapiens
0.68	0.7766	-0.0549119	PRMT5	0.179	FIB-associated protein complex	DIV14.DIV5	FALSE	rnorvegicus
0.679	1.44236	0.768086	C1QBP	-0.617103	emerin C24	Neu.IPS	FALSE	hsapiens
0.679	1.22204	-1.44284	RBBP4	-1.78285	Sin3-CI	Neu.NPC	TRUE	hsapiens
0.679	1.11461	1.96021	DKC1	0.781423	telomerase	Neu.NPC	FALSE	hsapiens
0.679	1.26726	1.75097	WDR5	1.94808	Yph1-L	Neur.Stem	TRUE	drerio
0.679	0.876427	1.21762	HIRA	0.11318	H3.3 com	D3.D0	FALSE	mmusculus
0.678	1.59038	1.61481	ACTB	1.54803	INO80.com	Neu.IPS	TRUE	hsapiens
0.678	1.46131	0.234481	RPA2	0.404187	53BP1-containing complex	Neu.IPS	TRUE	hsapiens
0.678	1.20081	-0.42882	GNB2	0.492023	heterotrimeric G-protein complex	Neu.NPC	TRUE	hsapiens
0.678	1.19253	-1.94823	ACTL6A	-1.88504	BAF complex	DIV14.DIV1	TRUE	rnorvegicus
0.678	0.76186	-1.46244	EP300	-0.965006	TCF4-CTNNB1-SUMO1-EP300-HADAC6 complex	D3.D0	TRUE	mmusculus
0.677	1.05079	0.350068	CDC5L	0.675663	Spliceosome-Prp19	NPC.iPS	TRUE	hsapiens
0.677	1.19088	-0.457729	VPS26A	-0.059615	retromer complex	Neu.NPC	TRUE	hsapiens
0.676	1.48133	-0.625552	MCM2	-2.55232	emerin C24	Neu.IPS	TRUE	hsapiens
0.676	1.22823	0.258648	TUBB2B	1.10503	Tubulins	Neu.NPC	TRUE	hsapiens
0.676	1.22852	-1.11757	TJP1B	0.449746	CF IIAm complex (Cleavage factor IIAm complex)	Neur.Stem	TRUE	drerio
0.676	1.26825	0.531661	HNRNPDL	3.1671	Large Drosha complex	Neur.Stem	TRUE	drerio
0.676	1.21981	0.589492	SNRPD1	1.10655	Survival of motor neuron (SMN) complex	Neur.Stem	TRUE	drerio
0.676	0.871255	-1.29102	CCNT1	-1.65895	HES1 promoter-Notch enhancer complex	D10.D3	TRUE	mmusculus
0.676	0.807517	-0.894383	RBBP4	-1.57021	NK-3-Groucho-HIPK2-SIN3A-RbpA48-HDAC1 complex	D10.D3	TRUE	mmusculus
0.676	0.845399	-1.95736	COPS5	-1.29662	COP9 signalosome	D3.D0	TRUE	mmusculus
0.675	1.4837	-0.648184	POLR2L	-1.34367	RNA polymerase II core complex	Neu.IPS	TRUE	hsapiens
0.675	0.753188	0.831666	DYNLL2	1.02527	cytoplasmic dynein complex	D3.D0	TRUE	mmusculus
0.674	1.16079	2.91103	RPL21	0.126487	cytoplasmic ribosomal large subunit	NPC.iPS	FALSE	hsapiens
0.674	1.45072	-1.30037	CUL1	-1.12985	SCF-CDC4 complex	Neu.IPS	TRUE	hsapiens
0.674	1.59514	-0.742174	TUBB8	0.559347	Tubulins	Neu.IPS	TRUE	hsapiens
0.674	0.870551	-1.05061	PRKDC	-1.40412	H3.3 com	D3.D0	TRUE	mmusculus
0.673	1.22823	-0.0505886	TUBB	0.65236	Tubulins	Neu.NPC	TRUE	hsapiens
0.673	0.7764	-0.982815	TUBAL3	-0.856	smc5p-Smc6p complex	DIV14.DIV5	TRUE	rnorvegicus
0.673	0.877033	1.86154	ATP5H	0.817269	F0/F1 ATP synthase (complex V)	D10.D3	FALSE	mmusculus
0.673	0.769886	1.06977	DYNC1I1	0.741907	cytoplasmic dynein complex	D10.D3	TRUE	mmusculus
0.673	0.767393	-1.09756	CUL1	-0.960703	nuclear ubiquitin ligase complex	D3.D0	TRUE	mmusculus
0.672	1.44181	-0.97269	FBL	-1.41334	FIB-associated protein complex	Neu.IPS	TRUE	hsapiens
0.672	0.865898	-1.03477	SEC31A	-0.72526	COPII	D3.D0	TRUE	mmusculus
0.671	1.44236	-0.555395	MCM6	-2.4549	emerin C24	Neu.IPS	TRUE	hsapiens
0.671	1.55095	-1.60402	GEMIN5	-2.45356	Survival of motor neuron (SMN) complex	Neu.IPS	TRUE	hsapiens
0.671	1.2581	0.350467	TUBB4B	1.23944	Tubulins	Neu.NPC	TRUE	hsapiens
0.671	0.600834	0.436536	TFAM	-0.091622	INO80.com	DIV5.DIV1	TRUE	rnorvegicus
0.671	0.76605	-1.13606	PFN1	-0.731889	Profilin 1 complex	D3.D0	TRUE	mmusculus
0.67	1.09485	-1.84098	WIBG	-0.687593	Exon Junction Complex (EJC)	NPC.iPS	FALSE	hsapiens
0.67	1.20839	0.747944	ACTB	0.49459	P2X7 receptor signalling complex	Neu.NPC	TRUE	hsapiens
0.67	0.7375	-0.727029	RRP7A	-0.663	UTP C complex	DIV14.DIV5	FALSE	rnorvegicus
0.67	0.626079	-1.70258	CD2BP2	-0.985704	Spliceosome-U5	DIV5.DIV1	FALSE	rnorvegicus
0.669	1.441	-1.61519	MTA3	-2.04863	NuRD complex	Neu.IPS	TRUE	hsapiens
0.669	0.7762	-0.0558506	C1QBP	0.178	FIB-associated protein complex	DIV14.DIV5	FALSE	rnorvegicus
0.669	0.611135	1.51657	EIF4A2	0.570129	eIF4F	DIV5.DIV1	TRUE	rnorvegicus
0.669	1.38483	-1.97543	SEC23B	-1.32795	COPII	D10.D0	TRUE	mmusculus
0.669	0.74158	0.955859	CCNY	0.945192	Pho85p/Pcl1p complex	D10.D3	TRUE	mmusculus
0.668	0.985336	0.911136	RBBP4	0.858387	ELL.com	NPC.iPS	TRUE	hsapiens
0.668	1.29236	-1.60519	ING2	0.400101	NuA4/Tip60 HAT complex	Neur.Stem	TRUE	drerio
0.668	1.15386	-0.701296	ATP6V1G1	1.03454	H+transporting ATPase; vacuolar	DIV14.DIV1	TRUE	rnorvegicus
0.668	1.15838	1.58952	HIST2H2BE	0.422023	H2AX complex; isolated from cells without IR exposure	DIV14.DIV1	TRUE	rnorvegicus
0.668	0.791048	-1.39308	YY1	-0.898938	INO80 complex	D3.D0	TRUE	mmusculus
0.668	0.871599	-1.47263	NUDT21	-1.2721	CF IIAm complex (Cleavage factor IIAm complex)	D3.D0	FALSE	mmusculus
0.667	1.45161	0.784729	EMD	-0.593993	emerin C24	Neu.IPS	FALSE	hsapiens
0.667	1.08949	1.48132	CNOT6A	1.66998	CCR4-NOT complex	Neur.Stem	TRUE	drerio
0.667	1.20007	-1.52471	KIN	1.00303	Spliceosome-B	Neur.Stem	FALSE	drerio
0.667	0.581192	1.69199	AP2M1	0.611426	AP-1 adaptor complex	DIV5.DIV1	TRUE	rnorvegicus
0.667	1.4166	-1.75062	AK6	-2.35295	STAGA complex	D10.D0	TRUE	mmusculus
0.667	0.856315	2.19838	EXOSC1	0.0299651	Exosome	D10.D3	FALSE	mmusculus
0.666	0.743489	-0.750341	TAF9	-1.55742	TFIID complex	D10.D3	TRUE	mmusculus
0.665	1.13965	0.896357	TUBB3	1.82945	Tubulins	NPC.iPS	TRUE	hsapiens
0.665	0.887401	1.14055	CDC37	0.370452	emerin C25	D10.D3	TRUE	mmusculus
0.664	1.42259	0.298229	CLTC	0.447403	Profilin 1 complex	Neu.IPS	TRUE	hsapiens
0.664	1.03641	-0.0412078	KDM1A	-0.56121	ELL.com	Neu.NPC	TRUE	hsapiens
0.664	0.60187	0.883676	PRKAG1	0.428239	ASCOM complex	DIV5.DIV1	FALSE	rnorvegicus
0.664	1.41101	1.85425	IPO4	-0.288538	H3.3 com	D10.D0	TRUE	mmusculus
0.664	1.22293	-0.984155	TCF4	-2.05262	TCF4-CTNNB1-SUMO1-EP300-HADAC6 complex	D10.D0	TRUE	mmusculus
0.663	1.25251	-0.712779	SNRPD1	-1.56779	emerin C52	Neu.NPC	TRUE	hsapiens
0.663	1.29453	-2.44256	AAAS	-0.785328	Nuclear pore complex (NPC)	Neur.Stem	FALSE	drerio
0.663	0.7608	0.69116	MAGEE1	0.246	smc5p-Smc6p complex	DIV14.DIV5	TRUE	rnorvegicus
0.662	0.771	0.48342	MAPK3	0.728	STE5-MAPK complex	DIV14.DIV5	TRUE	rnorvegicus
0.661	1.20081	-0.260149	GNB1	0.74838	heterotrimeric G-protein complex	Neu.NPC	TRUE	hsapiens
0.661	0.799197	1.63165	CAPZA2	0.758758	RICH1/AMOT polarity complex; Flag-Rich1 precipitated	D10.D3	TRUE	mmusculus
0.66	1.21909	1.30082	HDAC2	0.7011	HCF-1N	Neu.NPC	TRUE	hsapiens
0.66	1.12234	0.365276	RFC2	0.104545	RC complex during S-phase of cell cycle	Neu.NPC	TRUE	hsapiens
0.66	0.821	1.18999	XRCC5	0.018	H3.3 com	DIV14.DIV5	TRUE	rnorvegicus
0.66	0.885468	-1.07261	SEC24A	-0.751354	COPII	D3.D0	TRUE	mmusculus
0.659	1.15085	0.827727	RBBP4	0.858387	HCF-1N	NPC.iPS	TRUE	hsapiens
0.659	1.14888	-0.728985	KPNB1	-1.52636	Nuclear cap binding complex (NCBC)	Neu.NPC	TRUE	hsapiens
0.659	1.04521	-1.46279	RBBP4	1.2966	NK-3-Groucho-HIPK2-SIN3A-RbpA48-HDAC1 complex	Neur.Stem	TRUE	drerio
0.659	1.0485	0.347333	INPP5K	-0.19994	HES1 promoter-Notch enhancer complex	DIV14.DIV1	TRUE	rnorvegicus
0.659	0.7644	-0.960029	SMC5	-0.841	smc5p-Smc6p complex	DIV14.DIV5	FALSE	rnorvegicus
0.659	0.583436	-0.318751	GNB2	0.803917	heterotrimeric G-protein complex	DIV5.DIV1	TRUE	rnorvegicus
0.659	0.890698	-1.58038	GTPBP4	-1.53137	Yph1-L	D10.D3	TRUE	mmusculus
0.658	0.676769	-0.989096	PBRM1	-0.653599	RSC	DIV5.DIV1	FALSE	rnorvegicus
0.658	0.860373	0.99383	PABPC1	-0.083341	H2AX complex; isolated from cells without IR exposure	D10.D3	TRUE	mmusculus
0.658	0.793838	-1.13644	RPA1	-1.15899	RNA polymerase I core complex	D10.D3	FALSE	mmusculus
0.658	0.763079	-0.974294	TIMM50	0.303964	mitochondrial inner membrane presequence translocase complex	D3.D0	TRUE	mmusculus
0.657	0.993665	-0.626001	COX4I1	-1.08538	Cytochrome c oxidase (complex IV)	NPC.iPS	TRUE	hsapiens
0.657	1.42594	-0.565099	POLR2D	-1.19927	RNA polymerase II core complex	Neu.IPS	FALSE	hsapiens
0.657	0.830875	-1.18063	ARPIN	-0.716485	AP-3 adaptor complex	D3.D0	FALSE	mmusculus
0.657	0.747285	0.866737	PPP2R5A	0.164788	HDAC1-PP1	D3.D0	TRUE	mmusculus
0.656	1.02453	-0.638967	HSPA8	-0.13	Profilin 1 complex	NPC.iPS	TRUE	hsapiens
0.656	1.61308	1.1263	PRKDC	0.0984667	H3.3 com	Neu.IPS	TRUE	hsapiens
0.656	1.51599	1.4577	ATP5O	2.31472	F0/F1 ATP synthase (complex V)	Neu.IPS	FALSE	hsapiens
0.656	0.987111	0.710784	PRMT1	0.95098	FIB-associated protein complex	Neu.NPC	TRUE	hsapiens
0.656	1.22093	0.456661	HNRNPUA	3.05353	Large Drosha complex	Neur.Stem	TRUE	drerio
0.656	0.980615	-1.205	GTF2F1	-1.58247	Flag-FCP1	DIV14.DIV1	FALSE	rnorvegicus
0.656	0.664347	-2.01697	GTF2F1	-0.964559	RNA polymerase II complex; chromatin structure modifying	DIV5.DIV1	FALSE	rnorvegicus
0.656	0.825503	-1.16994	AP3B1	-0.71004	AP-3 adaptor complex	D3.D0	TRUE	mmusculus
0.655	1.03132	1.12872	HNRNPC	0.107237	Toposome	NPC.iPS	TRUE	hsapiens
0.654	1.35463	-0.514233	EMD	-0.593993	Emerin regulatory complex	Neu.IPS	FALSE	hsapiens
0.654	0.7762	-0.286762	TUBA1A	-0.068	FIB-associated protein complex	DIV14.DIV5	TRUE	rnorvegicus
0.654	1.2244	-1.46794	EIF4A1	-1.59491	eIF4F	D10.D0	TRUE	mmusculus
0.654	0.800067	1.57528	RELA	0.390696	TNF-alpha/Nf-kappa B signaling complex (RPL6; RPL30; RPS13; CHUK; DDX3X; NFKB2; NFKBIB; REL; IKBKG; NFKB1; MAP3K8; RELB; GLG1; NFKBIA; RELA; TNIP2; GTF2I)	D3.D0	TRUE	mmusculus
0.653	0.976589	1.74204	GTF2I	0.21525	TNF-alpha/Nf-kappa B signaling complex (RPL6; RPL30; RPS13; CHUK; DDX3X; NFKB2; NFKBIB; REL; IKBKG; NFKB1; MAP3K8; RELB; GLG1; NFKBIA; RELA; TNIP2; GTF2I)	NPC.iPS	TRUE	hsapiens
0.653	1.30503	1.6879	RAB8B	0.990955	Sro1p/Sec4p/Sec9p complex	Neu.IPS	TRUE	hsapiens
0.653	1.20594	-1.92645	BOP1	-1.40932	Yph1-L	Neu.NPC	FALSE	hsapiens
0.653	1.21923	-0.674658	RBM8A	1.87046	mRNA cleavage factor complex (CFI)	Neur.Stem	FALSE	drerio
0.653	1.34338	1.13973	AP3S2	1.53056	AP-3 adaptor complex	D10.D0	TRUE	mmusculus
0.652	0.826617	-0.221065	EIF3I	-0.359356	eIF3	D10.D3	FALSE	mmusculus
0.651	1.15589	2.2281	MRPL49	0.462488	mitochondrial ribosomal large subunit	NPC.iPS	FALSE	hsapiens
0.651	0.936918	0.770704	POLR2B	0.746283	Flag-FCP1	NPC.iPS	TRUE	hsapiens
0.651	1.19989	-0.768003	MRPL49	-0.92189	mitochondrial ribosomal large subunit	Neu.NPC	FALSE	hsapiens
0.651	0.843513	0.932378	ACTB	0.126968	INO80.com	D10.D3	TRUE	mmusculus
0.651	0.866629	2.37426	RSL1D1	0.691413	Yph1-L	D3.D0	TRUE	mmusculus
0.65	1.20324	1.22556	YWHAG	1.52977	Kinase maturation complex 1	Neu.NPC	TRUE	hsapiens
0.65	1.18057	1.48645	COPS5	1.26707	COP9 signalosome	Neu.NPC	TRUE	hsapiens
0.65	1.01455	-1.47862	XRCC6	-1.29407	DNA-PK-Ku-eIF2-NF90-NF45 complex	DIV14.DIV1	TRUE	rnorvegicus
0.65	0.787143	1.81929	CDK9	0.099	ELL.com	DIV14.DIV5	TRUE	rnorvegicus
0.65	1.34046	-1.85941	MLLT3	-2.55599	AF4.com	D10.D0	TRUE	mmusculus
0.649	1.05693	-1.44329	WDR61	0.53087	Paf complex	Neur.Stem	TRUE	drerio
0.649	1.22687	-1.97127	WAPLB	0.959473	Cohesin complex	Neur.Stem	TRUE	drerio
0.649	0.807462	1.49573	ATP6V1D	1.694	H+transporting ATPase; vacuolar	DIV14.DIV5	FALSE	rnorvegicus
0.649	0.6735	1.62699	RPS13	0.27	TNF-alpha/Nf-kappa B signaling complex (RPL6; RPL30; RPS13; CHUK; DDX3X; NFKB2; NFKBIB; REL; IKBKG; NFKB1; MAP3K8; RELB; GLG1; NFKBIA; RELA; TNIP2; GTF2I)	DIV14.DIV5	TRUE	rnorvegicus
0.649	0.832735	-0.941608	TAF12	-1.60794	TAF complex	D10.D3	FALSE	mmusculus
0.649	0.820029	1.68369	POLR2H	-0.250667	RNA polymerase II core complex	D10.D3	FALSE	mmusculus
0.649	0.851684	-1.99537	HDAC1	-1.25844	Sin3-CI	D3.D0	TRUE	mmusculus
0.648	1.02231	0.145754	ACTG1	0.718323	Profilin 1 complex	NPC.iPS	TRUE	hsapiens
0.648	1.06662	0.809615	RBBP4	0.858387	NuRD complex	NPC.iPS	TRUE	hsapiens
0.647	1.00503	1.2827	TLN1	0.238267	Polycystin-1 multiprotein complex (ACTN1; CDH1; SRC; JUP; VCL; CTNNB1; PXN; BCAR1; PKD1; PTK2; TLN1)	NPC.iPS	TRUE	hsapiens
0.647	1.0143	-0.76977	GAPDH	-0.25654	HMGB1-HMGB2-HSC70-ERP60-GAPDH complex	NPC.iPS	TRUE	hsapiens
0.647	0.846206	-1.51334	YPEL5	-0.35678	RANBP9-containing complex	D10.D3	TRUE	mmusculus
0.647	0.793523	1.26845	CDK8	-0.112744	Kornberg's mediator (SRB) complex	D10.D3	TRUE	mmusculus
0.647	0.824664	-1.58217	PDE6D	-0.736161	smc5p-Smc6p complex	D3.D0	FALSE	mmusculus
0.646	1.16037	2.02029	BUB3	0.700663	Spliceosome-A	Neu.NPC	TRUE	hsapiens
0.646	1.16068	-2.04554	SRCAP	0.800579	N-CoR-1	Neur.Stem	TRUE	drerio
0.646	0.80799	-1.15048	YY1	-1.45965	INO80 complex	D10.D3	TRUE	mmusculus
0.646	0.75634	0.837484	DYNLL1	1.02947	cytoplasmic dynein complex	D3.D0	TRUE	mmusculus
0.645	1.08867	-1.05795	LSM8	-1.19698	emerin C52	DIV14.DIV1	TRUE	rnorvegicus
0.645	0.949216	0.57196	GNB5	2.29042	heterotrimeric G-protein complex	DIV14.DIV1	TRUE	rnorvegicus
0.645	0.818029	0.16742	SAFB2	0.0384679	eIF3	D3.D0	TRUE	mmusculus
0.644	1.46625	0.66008	VPS35	2.01616	retromer complex	Neu.IPS	FALSE	hsapiens
0.644	0.7734	-1.82461	SNX6	-0.369	retromer complex	DIV14.DIV5	TRUE	rnorvegicus
0.644	1.17152	-1.14432	HDGF	-2.49599	ISW1b complex	D10.D0	TRUE	mmusculus
0.644	0.78541	0.0683775	AMOT	-0.358764	RICH1/AMOT polarity complex; Flag-Rich1 precipitated	D3.D0	TRUE	mmusculus
0.644	0.748901	1.69048	CDK16	0.912797	Pho85p/Pcl1p complex	D3.D0	TRUE	mmusculus
0.643	0.69275	-0.359515	ACSL4	0.335	Fatty Acid Import Complex	DIV14.DIV5	TRUE	rnorvegicus
0.643	0.697	-0.381611	SLC27A4	0.318	Fatty Acid Import Complex	DIV14.DIV5	TRUE	rnorvegicus
0.643	0.577431	0.27937	EIF2S1	-0.0906451	DNA-PK-Ku-eIF2-NF90-NF45 complex	DIV5.DIV1	FALSE	rnorvegicus
0.643	0.774689	0.609061	MAX	-0.455513	E2F6.com-1	D10.D3	FALSE	mmusculus
0.642	1.02392	-0.336724	HSPA8	-0.13	Spliceosome-Prp19	NPC.iPS	TRUE	hsapiens
0.642	1.08983	-1.24462	EIF3B	-0.99444	eIF3	NPC.iPS	FALSE	hsapiens
0.642	0.996841	1.00471	PARP1	0.00968333	RC complex during S-phase of cell cycle	NPC.iPS	TRUE	hsapiens
0.642	1.47651	0.824541	TOP1	-0.0759333	RC complex during S-phase of cell cycle	Neu.IPS	TRUE	hsapiens
0.642	1.2382	-0.0812514	TUBB8	0.607475	Tubulins	Neu.NPC	TRUE	hsapiens
0.642	1.23382	-0.940527	PRKDC	-0.227557	H3.3 com	Neur.Stem	TRUE	drerio
0.642	1.20058	-0.633712	CSTF3	1.92174	mRNA cleavage factor complex (CFI)	Neur.Stem	FALSE	drerio
0.642	0.603778	-0.849003	BAZ1B	-0.977076	B-WICH	DIV5.DIV1	TRUE	rnorvegicus
0.642	0.872865	1.21624	PRKDC	-0.202122	H3.3 com	D10.D3	TRUE	mmusculus
0.641	1.04299	0.869395	SNRPD2	0.39901	Survival of motor neuron (SMN) complex	NPC.iPS	FALSE	hsapiens
0.641	1.02326	1.31421	GLG1	0.543197	TNF-alpha/Nf-kappa B signaling complex (RPL6; RPL30; RPS13; CHUK; DDX3X; NFKB2; NFKBIB; REL; IKBKG; NFKB1; MAP3K8; RELB; GLG1; NFKBIA; RELA; TNIP2; GTF2I)	Neu.NPC	FALSE	hsapiens
0.641	0.616858	1.38982	VPS29	0.699236	retromer complex	DIV5.DIV1	FALSE	rnorvegicus
0.641	0.775274	-1.08193	ING1	-1.70278	SIN3 complex	D10.D3	TRUE	mmusculus
0.641	0.777638	1.10685	PRKACB	0.908889	cAMP-dependent protein kinase	D3.D0	TRUE	mmusculus
0.64	1.55391	0.675055	YWHAE	0.659627	emerin C52	Neu.IPS	TRUE	hsapiens
0.64	1.13856	-0.94792	PARP1	-1.79051	H3.3 com	Neu.NPC	TRUE	hsapiens
0.64	1.07946	-1.57545	DDX21	-1.18598	Toposome	Neu.NPC	TRUE	hsapiens
0.64	1.13723	0.439078	TOP1	0.193863	RC complex during S-phase of cell cycle	Neu.NPC	TRUE	hsapiens
0.64	1.03776	-0.376878	XRCC5	-0.289153	53BP1-containing complex	Neu.NPC	TRUE	hsapiens
0.64	1.28543	1.52569	MGA	0.0094006	E2F6.com-1	D10.D0	TRUE	mmusculus
0.639	1.12563	-1.563	SNRPD1	-1.56779	Survival of motor neuron (SMN) complex	Neu.NPC	TRUE	hsapiens
0.639	1.03502	1.60245	UTP6	1.83232	UTP B complex	Neur.Stem	FALSE	drerio
0.639	0.789912	-1.29927	WBP11	-1.58785	Spliceosome-Prp19	D10.D3	FALSE	mmusculus
0.639	0.767671	0.986869	SIN3A	-0.234054	DNMT3B	D10.D3	TRUE	mmusculus
0.639	0.841614	-0.691343	IQGAP1	-0.900989	emerin C52	D3.D0	TRUE	mmusculus
0.639	0.832858	-1.39408	TJP1	-1.22948	CF IIAm complex (Cleavage factor IIAm complex)	D3.D0	TRUE	mmusculus
0.639	0.822163	-0.707445	EIF3B	-0.796258	eIF3	D3.D0	FALSE	mmusculus
0.638	1.34	1.20112	CUL2	1.10273	SCF-CDC4 complex	Neu.IPS	TRUE	hsapiens
0.638	0.7238	-1.6781	COG6	-0.588	Conserved oligomeric Golgi (COG) complex	DIV14.DIV5	FALSE	rnorvegicus
0.637	0.626737	-1.16685	HDGF	-0.75863	emerin C52	DIV5.DIV1	TRUE	rnorvegicus
0.637	1.34544	1.27818	PPIG	-0.136146	Spliceosome-C	D10.D0	TRUE	mmusculus
0.637	0.849356	0.475092	TAF7	-0.480336	TAF complex	D10.D3	TRUE	mmusculus
0.637	0.721786	0.242366	RALBP1	0.490084	RalBP1-CCNB1-AP2A-NUMB-EPN1 complex	D10.D3	FALSE	mmusculus
0.637	0.82788	-1.07201	CBX2	-1.47831	Polycomb-group repressive complex 1 (PRC1)	D10.D3	TRUE	mmusculus
0.637	0.854731	1.05961	HNRNPL	0.423138	emerin C52	D3.D0	TRUE	mmusculus
0.637	0.746283	-0.938554	TIMM17B	0.326358	mitochondrial inner membrane presequence translocase complex	D3.D0	TRUE	mmusculus
0.636	1.21248	0.820877	NUDT21	2.38692	CF IIAm complex (Cleavage factor IIAm complex)	Neur.Stem	FALSE	drerio
0.636	1.01307	0.874715	ACTL6B	-0.00540706	INO80.com	DIV14.DIV1	TRUE	rnorvegicus
0.636	0.560978	-0.444474	PRKAR2A	0.409553	cAMP-dependent protein kinase	DIV5.DIV1	TRUE	rnorvegicus
0.636	1.32603	2.33714	LSM11	0.219626	telomerase	D10.D0	FALSE	mmusculus
0.636	0.857013	0.919871	THRA	0.157876	emerin C52	D10.D3	TRUE	mmusculus
0.636	0.860788	-1.51044	RSL1D1	-1.49505	Yph1-L	D10.D3	TRUE	mmusculus
0.636	0.83489	1.41061	U2AF1	0.292183	CF IIAm complex (Cleavage factor IIAm complex)	D3.D0	TRUE	mmusculus
0.635	0.581336	1.50469	CCNT1	-0.0761282	HES1 promoter-Notch enhancer complex	DIV5.DIV1	TRUE	rnorvegicus
0.635	0.82151	-1.84539	TBP	-1.71291	RNA polymerase II complex; chromatin structure modifying	D10.D3	TRUE	mmusculus
0.635	0.795546	1.68354	PHF20	0.568719	NSL	D3.D0	TRUE	mmusculus
0.634	1.11472	-1.07578	RBBP7	-1.30345	HCF-1N	Neu.NPC	TRUE	hsapiens
0.634	0.791375	1.07284	TLN1	0.991	Polycystin-1 multiprotein complex (ACTN1; CDH1; SRC; JUP; VCL; CTNNB1; PXN; BCAR1; PKD1; PTK2; TLN1)	DIV14.DIV5	TRUE	rnorvegicus
0.634	0.835682	-1.22801	TAF9	-1.55742	STAGA complex	D10.D3	TRUE	mmusculus
0.634	0.846191	1.16009	UBN1	0.0746973	H3.3 com	D3.D0	TRUE	mmusculus
0.634	0.720935	-0.89574	EIF4E	-0.934211	eIF4F	D3.D0	TRUE	mmusculus
0.633	1.07631	1.95087	TCERG1	1.01835	Spliceosome-A	NPC.iPS	TRUE	hsapiens
0.633	1.16097	0.334895	HNRNPA0B	3.13475	mRNA cleavage factor complex (CFI)	Neur.Stem	TRUE	drerio
0.633	1.21494	0.195363	EWSR1B	2.65785	Large Drosha complex	Neur.Stem	TRUE	drerio
0.633	0.7282	0.789138	AP2A2	0.864	RalBP1-CCNB1-AP2A-NUMB-EPN1 complex	DIV14.DIV5	TRUE	rnorvegicus
0.633	0.633769	0.624456	ATP6V1E1	1.22448	H+transporting ATPase; vacuolar	DIV5.DIV1	TRUE	rnorvegicus
0.633	0.549955	1.35981	TNKS1BP1	0.240986	CCR4-NOT complex	DIV5.DIV1	TRUE	rnorvegicus
0.633	0.581135	1.83426	SNRPB2	0.0821856	Spliceosome-U2	DIV5.DIV1	TRUE	rnorvegicus
0.632	1.18189	-1.40671	ACTR1B	-1.19939	RSC	Neu.NPC	TRUE	hsapiens
0.632	1.19723	0.335692	TARDBP	2.87034	Large Drosha complex	Neur.Stem	TRUE	drerio
0.632	0.6735	-1.62407	OGDH	0.135	mitochondrial oxoglutarate dehydrogenase complex	DIV14.DIV5	FALSE	rnorvegicus
0.632	0.578472	0.478839	PTK2	0.050535	Polycystin-1 multiprotein complex (ACTN1; CDH1; SRC; JUP; VCL; CTNNB1; PXN; BCAR1; PKD1; PTK2; TLN1)	DIV5.DIV1	TRUE	rnorvegicus
0.632	0.789113	-0.673213	SNRPD3	-1.255	Survival of motor neuron (SMN) complex	D10.D3	TRUE	mmusculus
0.631	1.14348	1.451	ACIN1A	2.97291	Exon Junction Complex (EJC)	Neur.Stem	TRUE	drerio
0.631	1.07755	-0.620343	TUBB4B	0.419589	Tubulins	DIV14.DIV1	TRUE	rnorvegicus
0.63	1.09942	0.832755	TUBAL3	1.76911	Tubulins	NPC.iPS	TRUE	hsapiens
0.63	1.13664	0.897111	TFAM	0.859807	INO80.com	Neu.NPC	TRUE	hsapiens
0.63	1.07465	-1.14701	RBBP4	-1.78285	NuRD complex	Neu.NPC	TRUE	hsapiens
0.63	0.7725	-0.697832	PTK2	-0.17	Polycystin-1 multiprotein complex (ACTN1; CDH1; SRC; JUP; VCL; CTNNB1; PXN; BCAR1; PKD1; PTK2; TLN1)	DIV14.DIV5	TRUE	rnorvegicus
0.63	0.8713	-0.778682	PBRM1	-1.05024	RSC	D10.D3	FALSE	mmusculus
0.63	0.840097	-2.07562	ACTL6A	-0.998055	RSC	D3.D0	TRUE	mmusculus
0.63	0.811542	1.77427	AFF4	0.270411	AF4.com	D3.D0	TRUE	mmusculus
0.629	0.983453	0.643392	MTA1	0.692053	NuRD complex	NPC.iPS	TRUE	hsapiens
0.629	0.742499	-1.29463	HDAC1	-1.25844	NK-3-Groucho-HIPK2-SIN3A-RbpA48-HDAC1 complex	D3.D0	TRUE	mmusculus
0.629	0.698703	-0.329609	SMARCA5	-0.645706	ISW1b complex	D3.D0	TRUE	mmusculus
0.628	1.04121	2.13924	GTF2F1	1.17333	RNA polymerase II complex; chromatin structure modifying	NPC.iPS	FALSE	hsapiens
0.628	0.982257	-0.733291	PDIA3	-0.216483	HMGB1-HMGB2-HSC70-ERP60-GAPDH complex	NPC.iPS	TRUE	hsapiens
0.628	1.32437	1.14345	M6PR	0.183586	Polycomb-group repressive complex 1 (PRC1)	D10.D0	FALSE	mmusculus
0.628	0.772265	-1.09012	CD3EAP	-1.13202	RNA polymerase I core complex	D10.D3	FALSE	mmusculus
0.628	0.733059	0.882382	SKP1A	0.247818	p27-cyclinE-Cdk2 - Ubiquitin E3 ligase (SKP1A; SKP2; CUL1; CKS1B; RBX1) complex	D10.D3	FALSE	mmusculus
0.628	0.827497	-0.715432	EIF3A	-0.803878	eIF3	D3.D0	FALSE	mmusculus
0.628	0.742262	-0.875972	MYSM1	-1.26024	2A-DUB	D3.D0	TRUE	mmusculus
0.627	0.998478	0.260887	BCAS2	0.571047	Spliceosome-Prp19	NPC.iPS	FALSE	hsapiens
0.627	1.17273	0.360731	HNRNPDL	3.1671	mRNA cleavage factor complex (CFI)	Neur.Stem	TRUE	drerio
0.627	0.808111	-1.27521	HAT1	-1.388	H3.3 com	DIV14.DIV5	FALSE	rnorvegicus
0.626	1.51168	-1.00286	RPL11	-1.95083	mitochondrial ribosomal large subunit	Neu.IPS	FALSE	hsapiens
0.626	1.00035	-0.633438	POLR2A	-1.24446	HES1 promoter-Notch enhancer complex	DIV14.DIV1	TRUE	rnorvegicus
0.626	0.7278	1.65094	TFAM	0.134	INO80.com	DIV14.DIV5	TRUE	rnorvegicus
0.626	0.81761	-0.943885	MRPS16	-0.290351	mitochondrial ribosomal small subunit	D3.D0	FALSE	mmusculus
0.625	1.4546	-1.48398	HSP90AB1	-0.971067	Kinase maturation complex 1	Neu.IPS	TRUE	hsapiens
0.625	1.16494	1.17874	YWHAB	1.48764	Kinase maturation complex 1	Neu.NPC	TRUE	hsapiens
0.625	0.591377	-0.866979	SRC	-0.682067	Polycystin-1 multiprotein complex (ACTN1; CDH1; SRC; JUP; VCL; CTNNB1; PXN; BCAR1; PKD1; PTK2; TLN1)	DIV5.DIV1	TRUE	rnorvegicus
0.625	1.23821	1.84315	CBX5	-0.627491	Suv39h1	D10.D0	TRUE	mmusculus
0.624	1.51877	0.508828	TUBB2A	2.4911	Tubulins	Neu.IPS	TRUE	hsapiens
0.624	1.00569	-1.26005	MCM4	-2.03439	MMS22L-TONSL	Neu.NPC	TRUE	hsapiens
0.624	1.20828	0.423263	ILF2	3.00295	Large Drosha complex	Neur.Stem	TRUE	drerio
0.624	0.553052	-0.673137	RPA3	-1.04594	RC complex during S-phase of cell cycle	DIV5.DIV1	TRUE	rnorvegicus
0.624	0.835682	-1.22801	AK6	-1.55742	STAGA complex	D10.D3	TRUE	mmusculus
0.624	0.743489	-0.750341	AK6	-1.55742	TFIID complex	D10.D3	TRUE	mmusculus
0.624	0.833288	-1.12477	RPL30	-0.953744	TNF-alpha/NF-kappa B signaling complex 6	D10.D3	FALSE	mmusculus
0.624	0.832908	1.02869	HNRNPU	0.399755	emerin C52	D3.D0	TRUE	mmusculus
0.623	0.96549	-0.990341	MCM4	-1.61532	emerin C24	NPC.iPS	TRUE	hsapiens
0.623	1.05833	0.677696	RBM8A	1.01008	mRNA cleavage factor complex (CFI)	NPC.iPS	FALSE	hsapiens
0.623	1.06182	0.549025	HSP90B1	0.477253	HMC Complex	NPC.iPS	TRUE	hsapiens
0.623	0.724996	0.914936	POLR1D	0.0351338	RNA polymerase I core complex	D10.D3	TRUE	mmusculus
0.622	0.928247	-1.23013	PRMT1	-1.35295	FIB-associated protein complex	NPC.iPS	TRUE	hsapiens
0.622	0.823336	-1.33887	HDAC1	-1.25844	HCF-1N	D3.D0	TRUE	mmusculus
0.621	0.997452	1.36208	LEO1	2.17437	Paf complex	Neur.Stem	FALSE	drerio
0.621	0.6825	-1.47473	AP3B1	-0.364	AP-3 adaptor complex	DIV14.DIV5	TRUE	rnorvegicus
0.62	0.904338	-0.653103	TOP2A	-1.24948	Toposome	NPC.iPS	TRUE	hsapiens
0.62	1.09378	-0.00763261	SVIL	-0.44993	P2X7 receptor signalling complex	Neu.NPC	TRUE	hsapiens
0.62	1.13346	-0.940518	RBBP4	-1.78285	H3.3 com	Neu.NPC	TRUE	hsapiens
0.62	1.09356	-1.14049	SDE2	-0.0504576	Spliceosome-C	Neur.Stem	TRUE	drerio
0.62	1.22668	-1.69351	ZMAT2	-2.4808	Spliceosome-B	D10.D0	TRUE	mmusculus
0.619	0.761	-2.17074	CREBBP	-1.577	GST-Smad3	DIV14.DIV5	TRUE	rnorvegicus
0.618	0.995948	1.11253	LSM3	1.15499	Spliceosome-LSm	NPC.iPS	FALSE	hsapiens
0.618	0.96325	-0.636733	EEF1A1	-0.370729	eEF1	DIV14.DIV1	TRUE	rnorvegicus
0.618	0.632403	-1.84603	SSRP1	-0.967134	H2AX complex; isolated from cells without IR exposure	DIV5.DIV1	TRUE	rnorvegicus
0.618	1.12914	-1.32898	TRAPPC3	-0.762676	TRAPP complex	D10.D0	TRUE	mmusculus
0.618	0.805653	0.962463	CAPRIN1	-0.022683	CF IIAm complex (Cleavage factor IIAm complex)	D10.D3	TRUE	mmusculus
0.618	0.706576	1.19919	GTF2H4	-0.0767366	TFIIH complex	D10.D3	FALSE	mmusculus
0.618	0.721366	1.12775	ACTB	0.593017	P2X7 receptor signalling complex	D3.D0	TRUE	mmusculus
0.617	0.993055	1.65768	POTEE	1.14598	INO80.com	NPC.iPS	TRUE	hsapiens
0.617	0.972651	-1.5328	PFDN4	0.0995033	prefoldin complex	NPC.iPS	FALSE	hsapiens
0.617	1.31763	-0.0640379	RAD50	-0.355683	Rap1 complex	Neu.IPS	TRUE	hsapiens
0.617	1.16322	-1.95676	EIF5	-0.466975	multi-eIF complex	Neur.Stem	FALSE	drerio
0.617	0.718073	0.465694	SHROOM2	1.13988	SPB components	D10.D3	TRUE	mmusculus
0.617	0.702542	-0.022833	TRAPPC1	0.231196	TRAPP complex	D10.D3	TRUE	mmusculus
0.617	0.744704	-1.14049	KANSL1	-0.64346	hMOF	D3.D0	TRUE	mmusculus
0.616	1.42594	-0.0813061	POLR2C	-0.358477	RNA polymerase II core complex	Neu.IPS	TRUE	hsapiens
0.616	1.07893	-2.01754	ARPC1B	0.137227	Arp2/3 protein complex	Neu.NPC	TRUE	hsapiens
0.616	1.09284	-0.63639	TUBB3	0.395124	Tubulins	DIV14.DIV1	TRUE	rnorvegicus
0.616	1.23228	-0.869912	MCM2	-2.7582	emerin C24	D10.D0	TRUE	mmusculus
0.616	0.728211	0.355813	RBBP4	-0.0862797	chromatin assembly complex	D3.D0	TRUE	mmusculus
0.615	1.42374	-1.53306	EIF3L	-1.8395	H2AX complex; isolated from cells without IR exposure	Neu.IPS	FALSE	hsapiens
0.614	0.986148	-1.70015	EEF1A1	-0.896563	2A-DUB	NPC.iPS	TRUE	hsapiens
0.614	1.26529	0.846746	ARF5	1.30227	Chs5p/Arf-1binding proteins (ChAPs)	Neu.IPS	TRUE	hsapiens
0.614	1.33412	1.13851	ATP6V0A1	2.78249	H+transporting ATPase; vacuolar	D10.D0	TRUE	mmusculus
0.614	1.1982	1.48124	WDR77	-0.155225	Flag-FCP1	D10.D0	TRUE	mmusculus
0.614	1.15863	0.742526	SIN3A	-0.856275	NK-3-Groucho-HIPK2-SIN3A-RbpA48-HDAC1 complex	D10.D0	TRUE	mmusculus
0.614	1.27725	-0.634512	SNAP23	-0.465476	Sro1p/Sec4p/Sec9p complex	D10.D0	TRUE	mmusculus
0.614	0.741792	0.956314	CDK16	0.945474	Pho85p/Pcl1p complex	D10.D3	TRUE	mmusculus
0.614	0.783593	1.91001	RAD21	-0.380104	Cohesin complex	D10.D3	TRUE	mmusculus
0.613	0.911523	0.0044541	PRKAR2A	1.85389	cAMP-dependent protein kinase	Neu.NPC	TRUE	hsapiens
0.613	1.10406	2.00329	RPS15A	0.812568	cytoplasmic ribosomal small subunit	DIV14.DIV1	TRUE	rnorvegicus
0.613	0.66175	-0.412316	TERF2IP	-0.677	Rap1 complex	DIV14.DIV5	FALSE	rnorvegicus
0.612	0.728167	-1.87673	VPS33A	-0.3	HOPS complex	DIV14.DIV5	TRUE	rnorvegicus
0.612	1.21261	-1.01762	PRKAG1	-0.748985	Snf1p/Snf4p/Sip2p complex	D10.D0	TRUE	mmusculus
0.612	0.808928	0.9707	HSPA5	0.0445673	HCF-1N	D10.D3	TRUE	mmusculus
0.612	0.837176	1.02194	NAA38	0.292323	emerin C25	D10.D3	FALSE	mmusculus
0.611	1.51807	-0.498851	SNRPD1	-1.27869	emerin C52	Neu.IPS	TRUE	hsapiens
0.611	0.7218	-1.19591	RAB8A	0.051	Sro1p/Sec4p/Sec9p complex	DIV14.DIV5	TRUE	rnorvegicus
0.611	1.25952	-0.587869	RAB8A	-0.403409	Sro1p/Sec4p/Sec9p complex	D10.D0	TRUE	mmusculus
0.611	0.822891	0.0955867	EIF3A	-0.0459388	eIF3	D10.D3	FALSE	mmusculus
0.611	0.759273	1.19187	SKP1A	0.247818	PFD-like	D10.D3	FALSE	mmusculus
0.611	0.696087	0.714834	EIF4A2	0.0315615	eIF4F	D3.D0	TRUE	mmusculus
0.611	0.745684	-0.908067	PRKX	-0.27079	cAMP-dependent protein kinase	D3.D0	TRUE	mmusculus
0.61	1.43107	-1.1005	ACTG1	-1.7031	BAF complex	Neu.IPS	TRUE	hsapiens
0.61	1.07025	-0.860104	PRKDC	-0.227557	DNA-PK-Ku-eIF2-NF90-NF45 complex	Neur.Stem	TRUE	drerio
0.61	1.24803	0.747505	ACTG1	0.965732	emerin	D10.D0	TRUE	mmusculus
0.61	1.28087	1.10132	GNAO1	2.66835	heterotrimeric G-protein complex	D10.D0	TRUE	mmusculus
0.609	0.741382	1.09645	STK38	-0.0401727	Flag-FCP1	D10.D3	TRUE	mmusculus
0.608	1.03871	-0.974814	COPG2	-0.9789	COPI	NPC.iPS	TRUE	hsapiens
0.608	1.05055	-2.22925	ATP5F1	-1.15053	F0/F1 ATP synthase (complex V)	NPC.iPS	FALSE	hsapiens
0.608	1.25952	0.117568	RAB10	0.5353	Sro1p/Sec4p/Sec9p complex	D10.D0	TRUE	mmusculus
0.608	0.778475	-1.16534	HMG20A	-1.5209	COREST complex	D10.D3	TRUE	mmusculus
0.607	1.3809	-0.532153	MRE11A	-1.19667	Rap1 complex	Neu.IPS	FALSE	hsapiens
0.607	1.0121	0.757812	PLRG1	0.61687	Spliceosome-Prp19	Neu.NPC	FALSE	hsapiens
0.607	1.16381	2.19592	TPRA	1.57468	Nuclear pore complex (NPC)	Neur.Stem	TRUE	drerio
0.607	0.688104	-1.38501	ING1	-1.70278	NuA3 histone acetyltransferase complex	D10.D3	TRUE	mmusculus
0.606	0.795	1.29276	HSPA13	0.382	RSC	DIV14.DIV5	TRUE	rnorvegicus
0.606	1.32541	0.811011	HSPA5	0.397818	RSC	D10.D0	TRUE	mmusculus
0.606	0.787198	1.47187	INTS10	-0.226538	Integrator	D10.D3	FALSE	mmusculus
0.605	0.70731	0.506817	PSIP1	-0.0484872	ISW1b complex	D3.D0	TRUE	mmusculus
0.604	0.89677	-0.95542	PRMT5	-0.549847	Flag-FCP1	NPC.iPS	FALSE	hsapiens
0.604	1.14385	0.781278	HNRNPL	0.178767	emerin C52	Neu.NPC	TRUE	hsapiens
0.604	1.13563	1.41052	MEAF6	2.52459	NuA4/Tip60 HAT complex	Neur.Stem	FALSE	drerio
0.604	0.717833	1.03531	PI4KA	0.827	P2X7 receptor signalling complex	DIV14.DIV5	TRUE	rnorvegicus
0.604	0.742035	-1.17076	ETF1	-1.07765	SMG-1-Upf1-eRF1-eRF3 complex (SURF)	D3.D0	FALSE	mmusculus
0.603	0.956917	-1.03106	EIF3B	-0.99444	multi-eIF complex	NPC.iPS	FALSE	hsapiens
0.602	1.0514	-2.06694	WDR12	-1.90141	Yph1-L	NPC.iPS	TRUE	hsapiens
0.602	1.45845	-1.69818	KARS	-2.36737	multi-tRNAsynthase complex	Neu.IPS	FALSE	hsapiens
0.602	0.620764	-1.04819	TMED1	-0.446089	COPII	DIV5.DIV1	TRUE	rnorvegicus
0.602	0.604786	-1.21362	TUBA1B	-0.0791472	Tubulins	DIV5.DIV1	TRUE	rnorvegicus
0.602	0.755776	1.88838	RRP7A	0.589277	UTP C complex	D3.D0	FALSE	mmusculus
0.601	0.986996	1.58955	COX4I1	0.617457	Cytochrome c oxidase (complex IV)	Neu.NPC	TRUE	hsapiens
0.601	0.6615	-1.45858	UBE2R2	-0.798	SCF-CDC4 complex	DIV14.DIV5	TRUE	rnorvegicus
0.601	0.61259	-1.77374	SUPT16H	-0.944846	H2AX complex; isolated from cells without IR exposure	DIV5.DIV1	FALSE	rnorvegicus
0.601	0.594432	0.985543	HSPA8	-0.07214	HCF-1N	DIV5.DIV1	TRUE	rnorvegicus
0.6	1.12745	0.763417	YWHAE	0.157887	emerin C52	Neu.NPC	TRUE	hsapiens
0.6	0.961164	0.557726	EIF4G3A	1.32239	eIF4F	Neur.Stem	TRUE	drerio
0.6	1.09756	-0.639932	TUBA1A	0.389724	Tubulins	DIV14.DIV1	TRUE	rnorvegicus
0.6	0.787397	0.853962	TUBB2A	1.85831	Tubulins	D10.D3	TRUE	mmusculus
0.6	0.776699	1.19769	CBX6	0.423897	Polycomb-group repressive complex 1 (PRC1)	D3.D0	TRUE	mmusculus
0.6	0.686661	0.749546	PPP1CA	0.0839563	HDAC1-PP1	D3.D0	TRUE	mmusculus
0.599	1.14608	-1.81489	PES1	-1.34447	Yph1-L	Neu.NPC	FALSE	hsapiens
0.599	1.0133	0.955222	HNRNPU	-0.11986	emerin C24	Neu.NPC	TRUE	hsapiens
0.599	0.968921	-1.00803	MFAP1	-0.52719	Spliceosome-B	Neu.NPC	FALSE	hsapiens
0.599	0.993328	-0.391666	RAN	0.914029	CRM1-RAN-PHAX-CBC complex (cap binding complex)	Neur.Stem	FALSE	drerio
0.599	0.920615	0.946933	PRKAR1B	1.93137	cAMP-dependent protein kinase	DIV14.DIV1	TRUE	rnorvegicus
0.599	0.769154	-1.16971	GNL3	-1.183	Yph1-L	DIV14.DIV5	TRUE	rnorvegicus
0.599	0.839446	-1.45223	GNL2	-1.46482	Yph1-L	D10.D3	TRUE	mmusculus
0.599	0.694865	0.34937	PDIA3	0.0109048	HMGB1-HMGB2-HSC70-ERP60-GAPDH complex	D10.D3	TRUE	mmusculus
0.598	0.947664	-0.65453	HSPA8	-0.13	HMGB1-HMGB2-HSC70-ERP60-GAPDH complex	NPC.iPS	TRUE	hsapiens
0.598	1.43402	2.0017	LSM3	0.906397	Spliceosome-LSm	Neu.IPS	FALSE	hsapiens
0.598	1.29893	-1.33315	MCM5	-4.41434	MCM complex	Neu.IPS	TRUE	hsapiens
0.598	1.10792	-1.51859	SLTM	-1.76366	eIF3	Neu.NPC	TRUE	hsapiens
0.598	0.969503	-0.371878	SIN3A	-1.23794	DNMT3B	Neu.NPC	TRUE	hsapiens
0.598	0.739333	1.93182	RNPS1	0.032	Exon Junction Complex (EJC)	DIV14.DIV5	TRUE	rnorvegicus
0.598	0.688104	0.389556	EPN1	0.642489	RalBP1-CCNB1-AP2A-NUMB-EPN1 complex	D10.D3	TRUE	mmusculus
0.598	0.796109	-0.118321	EIF3G	-0.257661	eIF3	D10.D3	FALSE	mmusculus
0.597	0.6702	-0.154967	EPN1	0.138	RalBP1-CCNB1-AP2A-NUMB-EPN1 complex	DIV14.DIV5	TRUE	rnorvegicus
0.597	0.613965	0.982124	TUBB4A	0.893483	Tubulins	DIV5.DIV1	TRUE	rnorvegicus
0.596	1.06703	1.64381	IPO4	-0.137616	H3.3 com	DIV14.DIV1	TRUE	rnorvegicus
0.596	0.6762	0.70461	NUMB	0.799	RalBP1-CCNB1-AP2A-NUMB-EPN1 complex	DIV14.DIV5	TRUE	rnorvegicus
0.596	1.22875	-1.05729	VCL	-1.15798	Polycystin-1 multiprotein complex (ACTN1; CDH1; SRC; JUP; VCL; CTNNB1; PXN; BCAR1; PKD1; PTK2; TLN1)	D10.D0	TRUE	mmusculus
0.596	1.33395	1.32595	YWHAQ	0.407796	emerin C52	D10.D0	TRUE	mmusculus
0.596	1.15993	0.325847	SAP130	-1.42375	emerin C24	D10.D0	FALSE	mmusculus
0.596	0.78783	-0.878138	AK6	-1.55742	TAF complex	D10.D3	TRUE	mmusculus
0.596	0.789438	1.51459	MRPL45	0.698596	smc5p-Smc6p complex	D3.D0	FALSE	mmusculus
0.595	0.947664	-0.296173	PDIA3	0.263497	HMGB1-HMGB2-HSC70-ERP60-GAPDH complex	NPC.iPS	TRUE	hsapiens
0.595	1.02812	0.495579	HSPA1A	0.179117	P2X7 receptor signalling complex	Neu.NPC	TRUE	hsapiens
0.595	0.6908	-0.856049	PPP4C	-0.61	HDAC1-PP1	DIV14.DIV5	TRUE	rnorvegicus
0.595	0.787189	2.03462	FBL	0.303731	TNF-alpha/NF-kappa B signaling complex 6	D3.D0	TRUE	mmusculus
0.594	0.857943	-0.890092	SMARCA5	-0.08389	ISW1b complex	NPC.iPS	TRUE	hsapiens
0.594	1.13345	-0.996893	RFC1	-0.087994	RC complex during S-phase of cell cycle	Neur.Stem	FALSE	drerio
0.594	1.00973	-1.22684	THOC3	0.935761	Transcription-export (TREX) complex	Neur.Stem	FALSE	drerio
0.594	0.754356	-1.4173	AZI2	-0.684194	Kinase maturation complex 2	D10.D3	TRUE	mmusculus
0.593	0.950205	0.927208	XRN1	-0.0386831	RNA Degradation Complex	DIV14.DIV1	TRUE	rnorvegicus
0.593	1.05475	-0.476024	TUBA1B	0.639612	Tubulins	DIV14.DIV1	TRUE	rnorvegicus
0.593	0.743756	-1.05608	RUVBL2	-0.97965	PFD-like	D10.D3	TRUE	mmusculus
0.592	1.30993	-0.589568	MYBBP1A	-2.03577	B-WICH	Neu.IPS	FALSE	hsapiens
0.592	1.3106	-0.374995	PARP1	-1.78083	RC complex during S-phase of cell cycle	Neu.IPS	TRUE	hsapiens
0.592	0.6525	-0.362034	XRCC6	-0.64	Rap1 complex	DIV14.DIV5	TRUE	rnorvegicus
0.592	1.27189	1.1155	ACTB	0.719985	INO80.com	D10.D0	TRUE	mmusculus
0.592	1.21865	0.991582	AP3B2	1.38088	AP-3 adaptor complex	D10.D0	TRUE	mmusculus
0.592	0.750148	-0.776922	PRKAB1	-0.485144	Snf1p/Snf4p/Sip2p complex	D10.D3	TRUE	mmusculus
0.591	0.766453	1.36806	WDR82	0.297284	COMPASS complex	D3.D0	FALSE	mmusculus
0.591	0.771813	1.50799	HSPA5	0.353251	H2AX complex; isolated from cells without IR exposure	D3.D0	TRUE	mmusculus
0.59	1.29297	-1.76906	MT-CO2	-1.83805	Cytochrome c oxidase (complex IV)	Neu.IPS	FALSE	hsapiens
0.59	0.599916	0.578485	HSPA13	0.247223	RSC	DIV5.DIV1	TRUE	rnorvegicus
0.59	0.603419	-0.708644	ATP6V0C	0.403483	H+transporting ATPase; vacuolar	DIV5.DIV1	TRUE	rnorvegicus
0.59	0.794578	-0.619464	SMARCD1	-0.896796	RSC	D10.D3	TRUE	mmusculus
0.59	0.767956	0.888349	GNB2	1.76267	heterotrimeric G-protein complex	D3.D0	TRUE	mmusculus
0.589	1.20765	-0.536772	XRCC6	-0.72597	53BP1-containing complex	Neu.IPS	TRUE	hsapiens
0.589	1.10468	-1.215	SNRPD1	-1.56779	emerin C25	Neu.NPC	TRUE	hsapiens
0.589	1.11203	0.583238	RBX1	-0.631078	p27-cyclinE-Cdk2 - Ubiquitin E3 ligase (SKP1A; SKP2; CUL1; CKS1B; RBX1) complex	D10.D0	TRUE	mmusculus
0.589	1.1844	1.13621	WDR24	-0.0537054	chromatin assembly complex	D10.D0	TRUE	mmusculus
0.589	0.68796	0.980441	ABI1	0.469447	Wave-2 complex	D3.D0	TRUE	mmusculus
0.588	1.18605	-0.568563	MCM7	-2.90606	MMS22L-TONSL	Neu.IPS	TRUE	hsapiens
0.588	1.04793	-1.3778	SSRP1	-1.52419	H2AX complex; isolated from cells without IR exposure	DIV14.DIV1	TRUE	rnorvegicus
0.588	0.531023	-0.383018	RUVBL2	-0.565624	INO80.com	DIV5.DIV1	TRUE	rnorvegicus
0.588	1.25334	1.06679	COMMD3	0.103676	Polycomb-group repressive complex 1 (PRC1)	D10.D0	FALSE	mmusculus
0.588	0.703242	1.04292	ACTG1	0.492521	Profilin 1 complex	D3.D0	TRUE	mmusculus
0.587	0.851225	-0.977348	RPA2	-0.733633	53BP1-containing complex	NPC.iPS	TRUE	hsapiens
0.587	1.30005	-0.516903	PFN1	-0.771157	Profilin 1 complex	Neu.IPS	TRUE	hsapiens
0.587	1.00774	1.25546	ACTL6A	1.93051	INO80.com	Neur.Stem	TRUE	drerio
0.587	1.05044	-1.24386	PDK3	0.334423	mitochondrial pyruvate dehydrogenase complex	DIV14.DIV1	TRUE	rnorvegicus
0.587	1.15993	-0.707838	MCM4	-2.57732	emerin C24	D10.D0	TRUE	mmusculus
0.587	1.05964	0.652284	PPP3CC	2.26943	calcineurin complex	D10.D0	TRUE	mmusculus
0.587	0.826651	-1.17122	LSM8	-1.15242	emerin C25	D10.D3	TRUE	mmusculus
0.587	0.781942	0.847101	EIF3L	-0.195385	H2AX complex; isolated from cells without IR exposure	D10.D3	FALSE	mmusculus
0.587	0.816998	1.00239	EMD	0.379868	emerin C52	D3.D0	FALSE	mmusculus
0.586	1.19321	-0.497355	XRCC5	-0.66821	53BP1-containing complex	Neu.IPS	TRUE	hsapiens
0.586	0.925421	-0.039354	PRKACA	1.7983	cAMP-dependent protein kinase	Neu.NPC	TRUE	hsapiens
0.586	1.13504	1.53073	RPL32	1.04698	cytoplasmic ribosomal large subunit	Neu.NPC	TRUE	hsapiens
0.586	1.00227	0.543264	POLR2B	1.38123	Flag-FCP1	Neur.Stem	TRUE	drerio
0.586	1.11471	1.33642	EIF4A2	0.276379	eIF4F	D10.D0	TRUE	mmusculus
0.585	0.952779	0.0271491	PRPF19	0.296853	Spliceosome-Prp19	NPC.iPS	TRUE	hsapiens
0.585	0.733286	-0.470547	EIF3I	-0.529	eIF3	DIV14.DIV5	FALSE	rnorvegicus
0.585	0.749429	0.840451	PPP2R5C	0.472106	protein phosphatase type 2A complex (Rts1p)	D10.D3	TRUE	mmusculus
0.584	0.877664	0.581007	MFAP1	-0.209823	Spliceosome-B	NPC.iPS	FALSE	hsapiens
0.584	0.908144	0.107103	SMARCA5	-0.720887	DNMT3B	Neu.NPC	TRUE	hsapiens
0.584	0.507388	0.799316	PRKAR2B	1.04118	cAMP-dependent protein kinase	DIV5.DIV1	TRUE	rnorvegicus
0.584	1.10284	-1.36204	POLR3C	-2.1637	RNA polymerase III core complex	D10.D0	FALSE	mmusculus
0.584	0.78783	-0.878138	TAF9	-1.55742	TAF complex	D10.D3	TRUE	mmusculus
0.584	0.747781	0.91696	AP3B2	0.548821	AP-3 adaptor complex	D3.D0	TRUE	mmusculus
0.584	0.794127	1.51228	EMD	0.379868	emerin C32	D3.D0	FALSE	mmusculus
0.583	0.912098	0.00626401	PRKACB	1.85618	cAMP-dependent protein kinase	Neu.NPC	TRUE	hsapiens
0.582	1.08081	1.32496	COPS8	1.15307	COP9 signalosome	Neu.NPC	FALSE	hsapiens
0.582	0.794479	-9.55334e-05	EIF3B	-0.140644	eIF3	D10.D3	FALSE	mmusculus
0.582	0.64799	1.47783	COX7C	1.16325	Cytochrome c oxidase (complex IV)	D3.D0	FALSE	mmusculus
0.582	0.818575	-1.04342	MSI2	-0.770491	mRNA cleavage factor complex (CFI)	D3.D0	TRUE	mmusculus
0.582	0.678779	0.919299	HNRNPH1	-0.204681	2A-DUB	D3.D0	TRUE	mmusculus
0.581	1.45558	1.59247	YWHAB	0.723347	emerin C25	Neu.IPS	TRUE	hsapiens
0.581	0.727268	0.475625	PPP2R2A	0.597291	RAF1-PPP2-PIN1 complex	D10.D3	TRUE	mmusculus
0.58	0.952727	-0.240441	VCP	0.300827	Profilin 1 complex	NPC.iPS	TRUE	hsapiens
0.58	1.1068	0.502997	XRCC5	-0.289153	H3.3 com	Neu.NPC	TRUE	hsapiens
0.58	0.743	-0.205713	EIF3C	-0.188	eIF3	DIV14.DIV5	FALSE	rnorvegicus
0.58	0.789443	-0.0509759	EIF3C	-0.191004	eIF3	D10.D3	FALSE	mmusculus
0.579	1.02418	0.77487	HSPA13	0.99377	RSC	NPC.iPS	TRUE	hsapiens
0.579	0.919219	-0.98722	STT3B	-0.846887	oligosaccharyl transferase complex	NPC.iPS	TRUE	hsapiens
0.579	1.23436	-0.407047	VCP	-0.60693	Profilin 1 complex	Neu.IPS	TRUE	hsapiens
0.579	1.26363	1.10587	EIF4A2	0.697503	eIF4F	Neu.IPS	TRUE	hsapiens
0.579	0.976826	-1.32813	CNOT10	0.0169241	CCR4-NOT complex	Neur.Stem	FALSE	drerio
0.579	0.681857	0.183384	EP300	-0.569821	TCF4-CTNNB1-SUMO1-EP300-HADAC6 complex	D10.D3	TRUE	mmusculus
0.579	0.699816	-0.822781	WASF2	-0.542787	Wave-2 complex	D3.D0	TRUE	mmusculus
0.578	0.874193	-0.0187047	SMC2	-0.856693	DNMT3B	Neu.NPC	TRUE	hsapiens
0.578	1.22378	-0.724342	MYH9	-0.678121	emerin	D10.D0	TRUE	mmusculus
0.578	1.15484	-1.55851	HSP90AB1	-0.578007	P2X7 receptor signalling complex	D10.D0	TRUE	mmusculus
0.578	1.06747	0.681497	CCNY	1.29397	Pho85p/Pcl1p complex	D10.D0	TRUE	mmusculus
0.578	0.745032	1.0995	GM10184	0.40384	Nuclear cap binding complex (NCBC)	D10.D3	TRUE	mmusculus
0.578	0.808656	1.35742	ERCC3	0.263326	CF IIAm complex (Cleavage factor IIAm complex)	D3.D0	FALSE	mmusculus
0.577	0.991297	2.19012	LARP1	1.12021	HMC Complex	Neu.NPC	TRUE	hsapiens
0.577	0.814378	0.952731	RPS26	0.246728	emerin C25	D10.D3	FALSE	mmusculus
0.577	0.745032	1.0995	KPNA2	0.40384	Nuclear cap binding complex (NCBC)	D10.D3	TRUE	mmusculus
0.577	0.750178	-1.10163	KDM1A	-0.921607	COREST complex	D3.D0	TRUE	mmusculus
0.576	1.43159	1.46051	YWHAG	1.6746	Kinase maturation complex 1	Neu.IPS	TRUE	hsapiens
0.576	1.04207	1.32396	THRAP3B	2.92486	Spliceosome-B	Neur.Stem	TRUE	drerio
0.576	0.555463	0.306866	MORF4L1	-0.206077	NuA4/Tip60 HAT complex	DIV5.DIV1	TRUE	rnorvegicus
0.576	0.683481	0.929963	RBM10	-0.198411	2A-DUB	D3.D0	TRUE	mmusculus
0.576	0.712835	-1.50727	PRKAA1	-0.39552	Snf1p/Snf4p/Sip2p complex	D3.D0	TRUE	mmusculus
0.575	0.6135	1.62328	ACTR1B	0.741	dynactin complex	DIV14.DIV5	TRUE	rnorvegicus
0.575	0.729941	-1.54471	HCFC1	-0.738841	NSL	D3.D0	TRUE	mmusculus
0.574	0.6722	-0.199538	SIKE1	-0.119	emerin	DIV14.DIV5	TRUE	rnorvegicus
0.573	0.950699	1.48953	RBBP4	0.858387	Sin3-CI	NPC.iPS	TRUE	hsapiens
0.573	1.33646	0.0249093	HNRNPF	-0.975607	Nuclear cap binding complex (NCBC)	Neu.IPS	TRUE	hsapiens
0.573	1.00746	0.234059	HSP90AB1	-0.1478	P2X7 receptor signalling complex	Neu.NPC	TRUE	hsapiens
0.573	0.611114	1.17385	TMED7	0.603033	COPII	DIV5.DIV1	TRUE	rnorvegicus
0.573	0.653067	-1.10838	GTF2H2	-1.16445	TFIIH complex	D10.D3	FALSE	mmusculus
0.572	1.00644	-0.199071	HNRNPH1	-0.64526	2A-DUB	Neu.NPC	TRUE	hsapiens
0.572	1.07105	-0.998114	SIN3A	-1.23794	HCF-1N	Neu.NPC	TRUE	hsapiens
0.572	0.561238	1.48108	AFF4	0.0147838	ELL.com	DIV5.DIV1	TRUE	rnorvegicus
0.572	0.728211	-0.067608	RBBP7	-0.438363	chromatin assembly complex	D3.D0	TRUE	mmusculus
0.572	0.757018	0.658463	RAB10	0.617304	Sro1p/Sec4p/Sec9p complex	D3.D0	TRUE	mmusculus
0.571	1.04037	-0.551465	TUBB6	0.524598	Tubulins	DIV14.DIV1	TRUE	rnorvegicus
0.57	0.503923	-1.23623	PPWD1	-1.18043	Spliceosome-C	DIV5.DIV1	TRUE	rnorvegicus
0.57	0.665807	-0.597867	EIF4A1	-0.561644	eIF4F	D10.D3	TRUE	mmusculus
0.57	0.632872	-0.405046	SLIT2	0.547814	SPB components	D10.D3	TRUE	mmusculus
0.57	0.773322	-0.470966	ACTN1	-0.884909	Polycystin-1 multiprotein complex (ACTN1; CDH1; SRC; JUP; VCL; CTNNB1; PXN; BCAR1; PKD1; PTK2; TLN1)	D3.D0	TRUE	mmusculus
0.569	0.681251	-0.184827	SUMO1	-0.868874	TCF4-CTNNB1-SUMO1-EP300-HADAC6 complex	D10.D3	FALSE	mmusculus
0.568	1.13268	1.53641	GTPBP4	1.80314	Yph1-L	Neur.Stem	TRUE	drerio
0.568	0.899466	-0.690966	EIF4G3B	0.258097	eIF4F	Neur.Stem	TRUE	drerio
0.568	0.937216	-1.71603	ACTL6A	-1.88504	Sin3-CI	DIV14.DIV1	TRUE	rnorvegicus
0.568	0.784794	-0.938072	CPSF6	-1.28224	CF IIAm complex (Cleavage factor IIAm complex)	D10.D3	TRUE	mmusculus
0.568	0.681104	0.948813	EIF4E	0.326582	eIF4F	D10.D3	TRUE	mmusculus
0.567	1.02992	0.887412	NOSIP	1.61622	Spliceosome-C	Neur.Stem	FALSE	drerio
0.567	1.08159	-0.0137336	HNRNPA0L	2.69815	mRNA cleavage factor complex (CFI)	Neur.Stem	TRUE	drerio
0.567	1.23373	-1.11318	SMC6	-1.24466	smc5p-Smc6p complex	D10.D0	TRUE	mmusculus
0.567	0.662822	-1.52769	POLR2A	-1.35529	RNA pol II containing coactivator complex Tat-SF	D10.D3	TRUE	mmusculus
0.566	0.948784	0.764691	SNRPD1	0.2891	Survival of motor neuron (SMN) complex	NPC.iPS	TRUE	hsapiens
0.566	1.23201	0.515291	BANF1	0.68744	Emerin regulatory complex	Neu.IPS	TRUE	hsapiens
0.566	0.959828	-0.417181	EIF4A1	-0.123337	eIF4F	Neu.NPC	TRUE	hsapiens
0.566	1.10026	0.828181	SUDS3	2.14084	HCF-1N	Neur.Stem	TRUE	drerio
0.566	1.05838	-0.354542	HSPA4A	0.847516	HCF-1N	Neur.Stem	TRUE	drerio
0.566	0.6722	-0.281018	ACTG1	-0.181	emerin	DIV14.DIV5	TRUE	rnorvegicus
0.565	1.12507	0.760255	C1QBP	0.15419	emerin C52	Neu.NPC	FALSE	hsapiens
0.565	0.932557	0.615485	SMARCC2	0.07481	RNA polymerase II complex; chromatin structure modifying	Neu.NPC	TRUE	hsapiens
0.565	1.01687	0.699558	SMARCB1B	2.33965	RSC	Neur.Stem	TRUE	drerio
0.565	1.09699	0.42164	RBBP4	1.2966	H3.3 com	Neur.Stem	TRUE	drerio
0.565	0.921863	1.34321	TCEA1	2.0995	AF4.com	Neur.Stem	TRUE	drerio
0.565	0.51178	-1.73653	NDUFS3	-0.154772	Respiratory chain complex I (early intermediate NDUFAF1 assembly); mitochondrial	DIV5.DIV1	FALSE	rnorvegicus
0.565	0.498313	0.302323	PARP1	-0.541869	RC complex during S-phase of cell cycle	DIV5.DIV1	TRUE	rnorvegicus
0.564	0.882697	1.39104	PFDN1	1.64563	prefoldin complex	NPC.iPS	FALSE	hsapiens
0.564	0.66952	-1.18157	POLR3C	-1.38128	RNA polymerase III core complex	D3.D0	FALSE	mmusculus
0.563	0.970909	-0.697207	HSP90AB1	-0.823267	HMC Complex	NPC.iPS	TRUE	hsapiens
0.563	0.812414	1.16699	SSRP1	-0.37491	MMS22L-TONSL	NPC.iPS	TRUE	hsapiens
0.563	1.27974	-1.27633	STT3B	-0.97204	oligosaccharyl transferase complex	Neu.IPS	TRUE	hsapiens
0.563	0.773564	-0.509279	SMARCD2	-0.790605	RSC	D10.D3	TRUE	mmusculus
0.563	0.775992	-0.544554	ACTL6A	-0.824601	RSC	D10.D3	TRUE	mmusculus
0.563	0.776733	0.902461	MRE11A	-0.0624486	CF IIAm complex (Cleavage factor IIAm complex)	D10.D3	FALSE	mmusculus
0.562	0.82298	-1.08745	PSMA6	-0.64206	Ubiquilin-proteasome complex	NPC.iPS	TRUE	hsapiens
0.562	1.23436	-0.016556	HSPA8	-0.0231767	Profilin 1 complex	Neu.IPS	TRUE	hsapiens
0.562	1.39508	0.704633	HNRNPH1	0.201937	Nuclear cap binding complex (NCBC)	Neu.IPS	TRUE	hsapiens
0.562	0.93334	0.228688	MORF4L1	-0.474179	NuA4/Tip60 HAT complex	DIV14.DIV1	TRUE	rnorvegicus
0.562	0.914635	0.0330975	CDK9	-0.534601	HES1 promoter-Notch enhancer complex	DIV14.DIV1	TRUE	rnorvegicus
0.562	1.12328	0.697397	POLR1D	-0.122186	RNA polymerase I core complex	D10.D0	TRUE	mmusculus
0.562	0.740581	-1.39008	HDAC1	-1.70856	ELL.com	D10.D3	TRUE	mmusculus
0.562	0.745719	-0.0321287	PTK2	-0.472288	Polycystin-1 multiprotein complex (ACTN1; CDH1; SRC; JUP; VCL; CTNNB1; PXN; BCAR1; PKD1; PTK2; TLN1)	D3.D0	TRUE	mmusculus
0.561	0.987612	0.442365	DNAJA1	0.365947	HMC Complex	NPC.iPS	TRUE	hsapiens
0.561	1.32499	1.68075	COPS5	1.71253	COP9 signalosome	Neu.IPS	TRUE	hsapiens
0.561	0.869898	0.49752	PDIA3	0.119743	HMGB1-HMGB2-HSC70-ERP60-GAPDH complex	Neu.NPC	TRUE	hsapiens
0.561	1.26468	-1.46763	BCCIP	-2.09776	emerin C25	D10.D0	FALSE	mmusculus
0.56	0.73975	0.982861	VCL	0.932	Polycystin-1 multiprotein complex (ACTN1; CDH1; SRC; JUP; VCL; CTNNB1; PXN; BCAR1; PKD1; PTK2; TLN1)	DIV14.DIV5	TRUE	rnorvegicus
0.56	0.687	1.5842	CTBP1	-0.133	CtBP	DIV14.DIV5	TRUE	rnorvegicus
0.56	0.6524	0.279502	PDE6D	-0.025	smc5p-Smc6p complex	DIV14.DIV5	FALSE	rnorvegicus
0.56	0.69893	-1.5242	EHMT2	-1.9414	Suv39h1	D10.D3	TRUE	mmusculus
0.56	0.660197	-1.64816	COX7C	-0.839847	Cytochrome c oxidase (complex IV)	D10.D3	FALSE	mmusculus
0.56	0.731586	-1.73267	MTF2	-2.02753	Polycomb-group repressive complex 2 (PRC2)	D10.D3	TRUE	mmusculus
0.559	0.895658	-0.671145	EEF1G	-0.464257	eEF1	NPC.iPS	TRUE	hsapiens
0.559	1.00709	0.613813	TUBB2B	1.56137	Tubulins	NPC.iPS	TRUE	hsapiens
0.559	1.45347	1.80504	WDR5	0.135023	Yph1-L	Neu.IPS	TRUE	hsapiens
0.559	1.04147	-0.557235	TUBB2B	0.515801	Tubulins	DIV14.DIV1	TRUE	rnorvegicus
0.559	0.504552	0.791868	PRKAR1B	1.0374	cAMP-dependent protein kinase	DIV5.DIV1	TRUE	rnorvegicus
0.559	0.650656	-1.22058	DDX21	-1.43888	Toposome	D10.D3	TRUE	mmusculus
0.558	1.05035	0.358821	CUL1	-0.877793	p27-cyclinE-Cdk2 - Ubiquitin E3 ligase (SKP1A; SKP2; CUL1; CKS1B; RBX1) complex	D10.D0	TRUE	mmusculus
0.558	0.694925	1.2238	INO80B	0.339373	INO80 complex	D3.D0	FALSE	mmusculus
0.557	0.906148	0.265128	POLR2C	0.287563	RNA polymerase II core complex	NPC.iPS	TRUE	hsapiens
0.557	0.940108	0.263045	TAF9	1.15303	STAGA complex	Neur.Stem	FALSE	drerio
0.557	0.685894	0.381019	AP2A2	0.63365	RalBP1-CCNB1-AP2A-NUMB-EPN1 complex	D10.D3	TRUE	mmusculus
0.557	0.724987	0.582932	STXBP5	0.56125	Sro1p/Sec4p/Sec9p complex	D3.D0	TRUE	mmusculus
0.557	0.688153	-1.19649	PPP2R2A	-0.348475	RAF1-PPP2-PIN1 complex	D3.D0	TRUE	mmusculus
0.556	0.844073	-0.371291	WDR5	-0.223208	ELL.com	NPC.iPS	TRUE	hsapiens
0.556	1.02274	1.40184	EIF3J	0.10067	eIF3	Neu.NPC	FALSE	hsapiens
0.556	1.01478	1.70705	EIF1B	1.43877	multi-eIF complex	Neur.Stem	TRUE	drerio
0.556	1.25086	-1.70892	HNRNPA0	-2.23515	mRNA cleavage factor complex (CFI)	D10.D0	TRUE	mmusculus
0.556	1.09198	-1.34993	CTDP1	-2.0637	Flag-FCP1	D10.D0	FALSE	mmusculus
0.556	0.749086	-1.28149	DCAF5	-0.912399	Rpd3L complex	D3.D0	TRUE	mmusculus
0.555	0.91584	0.214592	POLR2D	0.229413	RNA polymerase II core complex	NPC.iPS	FALSE	hsapiens
0.555	1.05457	1.01012	YWHAQ	1.33589	Kinase maturation complex 1	Neu.NPC	TRUE	hsapiens
0.555	0.914635	-0.432231	CCNT1	-1.03018	HES1 promoter-Notch enhancer complex	DIV14.DIV1	TRUE	rnorvegicus
0.555	0.6438	-0.069139	RALBP1	0.204	RalBP1-CCNB1-AP2A-NUMB-EPN1 complex	DIV14.DIV5	TRUE	rnorvegicus
0.554	0.491656	-0.342322	DMAP1	-0.638816	SRCAP	DIV5.DIV1	FALSE	rnorvegicus
0.554	0.768939	0.880902	GTF2H4	-0.0767366	CF IIAm complex (Cleavage factor IIAm complex)	D10.D3	FALSE	mmusculus
0.554	0.784515	-1.53141	FAM50A	-1.09501	Spliceosome-C	D3.D0	TRUE	mmusculus
0.553	0.990918	-0.291979	CSTF2	-0.07784	mRNA cleavage factor complex (CFI)	NPC.iPS	TRUE	hsapiens
0.553	0.6524	-0.5347	MAGED1	-0.561	smc5p-Smc6p complex	DIV14.DIV5	TRUE	rnorvegicus
0.553	0.675137	-0.422161	HIPK2	-1.23926	NK-3-Groucho-HIPK2-SIN3A-RbpA48-HDAC1 complex	D10.D3	TRUE	mmusculus
0.552	1.2424	-0.463155	GNAI2	0.831177	heterotrimeric G-protein complex	Neu.IPS	TRUE	hsapiens
0.551	0.922436	0.518386	SVIL	0.882305	P2X7 receptor signalling complex	NPC.iPS	TRUE	hsapiens
0.551	0.902155	-1.32303	ARPC3	-0.77519	Arp2/3 protein complex	NPC.iPS	FALSE	hsapiens
0.551	0.6438	0.599277	AP2A1	0.718	RalBP1-CCNB1-AP2A-NUMB-EPN1 complex	DIV14.DIV5	TRUE	rnorvegicus
0.551	0.754294	3.16741	RPL9	0.368	cytoplasmic ribosomal large subunit	DIV14.DIV5	TRUE	rnorvegicus
0.551	0.49658	0.626029	TUBA1A	0.287853	ASCOM complex	DIV5.DIV1	TRUE	rnorvegicus
0.551	1.0682	-1.0148	MFHAS1	0.989009	SPB components	D10.D0	TRUE	mmusculus
0.55	0.904452	-1.22105	ACTB	-0.202643	emerin	NPC.iPS	TRUE	hsapiens
0.55	0.924515	-0.0722179	SNRPF	-0.589417	Survival of motor neuron (SMN) complex	NPC.iPS	FALSE	hsapiens
0.55	1.05847	-2.0257	AUH	-1.09798	mitochondrial ribosomal small subunit	Neur.Stem	TRUE	drerio
0.55	1.08159	-0.111089	HNRNPABB	2.57623	mRNA cleavage factor complex (CFI)	Neur.Stem	TRUE	drerio
0.55	0.637	1.15617	ACTG1	-0.181	Emerin regulatory complex	DIV14.DIV5	TRUE	rnorvegicus
0.55	1.23519	0.333434	EIF3J2	0.206455	eIF3	D10.D0	TRUE	mmusculus
0.55	1.14928	-1.3641	EHMT2	-2.07749	E2F6.com-1	D10.D0	TRUE	mmusculus
0.55	0.786789	-0.596836	SMARCD3	-0.874988	RSC	D10.D3	TRUE	mmusculus
0.55	0.767164	-0.972086	PHC2	-1.40886	Polycomb-group repressive complex 1 (PRC1)	D10.D3	TRUE	mmusculus
0.55	0.738968	-0.946755	TUBAL3	0.705546	Tubulins	D10.D3	TRUE	mmusculus
0.549	0.911379	0.292404	POLR2A	0.31895	RNA polymerase II core complex	NPC.iPS	TRUE	hsapiens
0.549	1.26951	0.62007	NCBP2	0.05544	Nuclear cap binding complex (NCBC)	Neu.IPS	TRUE	hsapiens
0.549	0.993589	-1.37772	EIF5	-1.52247	multi-eIF complex	Neu.NPC	FALSE	hsapiens
0.549	0.572746	0.939315	HSPA4	-0.0969242	HCF-1N	DIV5.DIV1	TRUE	rnorvegicus
0.549	1.22976	1.05509	ACTL6B	0.659788	INO80.com	D10.D0	TRUE	mmusculus
0.549	0.699543	0.967491	PRKAR1B	1.36494	cAMP-dependent protein kinase	D10.D3	TRUE	mmusculus
0.549	0.729843	-1.52698	PAXIP1	-1.08221	KMT2C/D containing complex	D3.D0	TRUE	mmusculus
0.548	0.779505	-0.0650635	RBBP7	0.0350633	ELL.com	NPC.iPS	TRUE	hsapiens
0.548	0.866668	0.484605	HSPA8	0.106823	HMGB1-HMGB2-HSC70-ERP60-GAPDH complex	Neu.NPC	TRUE	hsapiens
0.548	0.592521	-0.683365	ATP6V1G1	0.419051	H+transporting ATPase; vacuolar	DIV5.DIV1	TRUE	rnorvegicus
0.548	1.10554	1.02273	WDR59	-0.152284	chromatin assembly complex	D10.D0	TRUE	mmusculus
0.548	0.709785	-0.27624	RNF2	-1.11986	E2F6.com-1	D10.D3	TRUE	mmusculus
0.547	1.0269	-1.35919	PFDN2	-0.592288	Kinase maturation complex 1	DIV14.DIV1	FALSE	rnorvegicus
0.547	0.6706	1.50143	AP2M1	0.874	AP-1 adaptor complex	DIV14.DIV5	TRUE	rnorvegicus
0.547	0.644172	-0.00221495	HDAC6	-0.720561	TCF4-CTNNB1-SUMO1-EP300-HADAC6 complex	D10.D3	TRUE	mmusculus
0.547	0.650399	0.804487	RAN	-0.26575	CRM1-RAN-PHAX-CBC complex (cap binding complex)	D10.D3	TRUE	mmusculus
0.547	0.774834	1.20429	ACTB	0.593017	BAF complex	D3.D0	TRUE	mmusculus
0.546	0.807069	-1.68458	ACTB	-0.202643	Emerin regulatory complex	NPC.iPS	TRUE	hsapiens
0.546	1.02321	1.13728	ATP5O	2.07626	F0/F1 ATP synthase (complex V)	Neu.NPC	FALSE	hsapiens
0.546	0.533651	1.4331	EIF2S3	0.333815	multi-eIF complex	DIV5.DIV1	TRUE	rnorvegicus
0.546	0.776688	-1.0527	SF3B3	-1.44927	STAGA complex	D10.D3	TRUE	mmusculus
0.545	1.40291	1.37287	MSI1	1.36759	mRNA cleavage factor complex (CFI)	Neu.IPS	TRUE	hsapiens
0.545	0.885005	-0.550529	EEF1D	-0.266401	eEF1	DIV14.DIV1	TRUE	rnorvegicus
0.545	0.752571	1.23678	C1QBP	0.178	emerin C52	DIV14.DIV5	FALSE	rnorvegicus
0.545	0.750549	-1.95468	HDAC1	-1.70856	emerin C32	D10.D3	TRUE	mmusculus
0.545	0.742713	1.58617	MED26	0.192979	AF4.com	D3.D0	FALSE	mmusculus
0.545	0.739874	-0.534953	EIF3C	-0.63168	eIF3	D3.D0	FALSE	mmusculus
0.545	0.652947	0.55403	PPP1R10	-0.0509003	HDAC1-PP1	D3.D0	TRUE	mmusculus
0.544	0.890048	-0.0131588	RBBP7	0.0350633	NuRD complex	NPC.iPS	TRUE	hsapiens
0.544	1.13314	0.197545	ACTB	0.291947	Emerin regulatory complex	Neu.IPS	TRUE	hsapiens
0.544	1.19262	-0.27015	XRCC6	-0.72597	Rap1 complex	Neu.IPS	TRUE	hsapiens
0.544	1.0682	0.772256	TMED10	0.97403	COPII	Neu.NPC	TRUE	hsapiens
0.544	0.985477	-0.654127	PRMT5	0.238909	Flag-FCP1	Neur.Stem	FALSE	drerio
0.544	0.689286	-0.351721	EIF3B	-0.376	eIF3	DIV14.DIV5	FALSE	rnorvegicus
0.544	0.667333	1.5665	STRAP	-0.121	Survival of motor neuron (SMN) complex	DIV14.DIV5	TRUE	rnorvegicus
0.544	0.666146	-0.360063	TAF6	-1.24805	TFIID complex	D10.D3	TRUE	mmusculus
0.544	0.714247	1.67279	HSP90B1	0.402495	HMC Complex	D3.D0	TRUE	mmusculus
0.543	0.904941	0.260573	HSPA8	0.106823	Spliceosome-Prp19	Neu.NPC	TRUE	hsapiens
0.543	0.806324	0.657092	TAF6	1.55292	TAF complex	Neur.Stem	TRUE	drerio
0.543	0.837274	0.235367	PAK6	1.3147	Cdc42p/Ste20p complex	DIV14.DIV1	TRUE	rnorvegicus
0.543	0.725	-1.21131	ATP6V1G1	0.337	H+transporting ATPase; vacuolar	DIV14.DIV5	TRUE	rnorvegicus
0.543	0.728917	-1.72677	PFDN2	-0.621	Kinase maturation complex 1	DIV14.DIV5	FALSE	rnorvegicus
0.543	1.2563	1.90597	MRPS16	1.61662	mitochondrial ribosomal small subunit	D10.D0	FALSE	mmusculus
0.543	1.05313	0.645605	PPP3R1	2.26075	calcineurin complex	D10.D0	TRUE	mmusculus
0.543	0.757728	-0.980201	ARPC1A	0.00801656	Arp2/3 protein complex	D10.D3	TRUE	mmusculus
0.543	0.711839	0.748522	SNAP25	1.28227	SNARE complex	D10.D3	TRUE	mmusculus
0.542	0.765429	-1.6817	RPL11	-0.457	mitochondrial ribosomal large subunit	DIV14.DIV5	TRUE	rnorvegicus
0.542	1.2543	1.14042	GPATCH1	-0.261455	Spliceosome-C	D10.D0	FALSE	mmusculus
0.542	0.720207	-0.619798	LLGL1	-0.214499	Sro1p/Sec4p/Sec9p complex	D10.D3	TRUE	mmusculus
0.542	0.733732	-0.134121	BCAR1	-0.568187	Polycystin-1 multiprotein complex (ACTN1; CDH1; SRC; JUP; VCL; CTNNB1; PXN; BCAR1; PKD1; PTK2; TLN1)	D3.D0	TRUE	mmusculus
0.542	0.675741	-0.310833	POLR1C	-0.602777	RNA polymerase I core complex	D3.D0	TRUE	mmusculus
0.541	1.0244	1.02463	SMARCC2	0.07481	Sin3-CI	Neu.NPC	TRUE	hsapiens
0.541	0.868282	0.371188	CDC42	1.43873	Cdc42p/Ste20p complex	DIV14.DIV1	TRUE	rnorvegicus
0.541	1.20174	0.590958	HSPA13	0.150481	RSC	D10.D0	TRUE	mmusculus
0.541	0.660747	1.23951	TOP2A	-0.389755	Toposome	D10.D3	TRUE	mmusculus
0.541	0.649844	1.24741	CTNNB1	0.164357	TCF4-CTNNB1-SUMO1-EP300-HADAC6 complex	D3.D0	TRUE	mmusculus
0.54	0.708451	-0.921402	NCBP1	-0.769916	Nuclear cap binding complex (NCBC)	D10.D3	FALSE	mmusculus
0.539	0.7771	-1.52166	SNRPF	-0.589417	Spliceosome-Sm	NPC.iPS	FALSE	hsapiens
0.539	1.35633	1.26581	MT-ATP6	2.13511	F0/F1 ATP synthase (complex V)	Neu.IPS	FALSE	hsapiens
0.539	1.20044	-0.567156	SNX6	0.421307	retromer complex	Neu.IPS	TRUE	hsapiens
0.539	0.904941	0.496643	CTNNBL1	0.348973	Spliceosome-Prp19	Neu.NPC	FALSE	hsapiens
0.539	0.892053	1.6352	SMARCC2	0.07481	N-CoR-1	Neu.NPC	TRUE	hsapiens
0.539	0.766742	0.222585	TAF9	1.15303	TAF complex	Neur.Stem	FALSE	drerio
0.539	0.703	-0.429385	EIF3G	-0.476	eIF3	DIV14.DIV5	FALSE	rnorvegicus
0.539	0.775533	-0.923813	HNRNPAB	-1.53657	mRNA cleavage factor complex (CFI)	D10.D3	TRUE	mmusculus
0.539	0.677632	-0.943624	SMC4	-1.91094	DNMT3B	D3.D0	TRUE	mmusculus
0.538	0.928545	-0.980117	GTF2F1	-1.18489	RNA polymerase II complex; chromatin structure modifying	Neu.NPC	FALSE	hsapiens
0.538	0.916006	-0.485485	POLR2C	-0.64604	RNA polymerase II core complex	Neu.NPC	TRUE	hsapiens
0.538	0.842672	1.30622	SKP1	0.152903	PFD-like	DIV14.DIV1	FALSE	rnorvegicus
0.538	0.60175	-0.673774	EEF1A1	-0.418	eEF1	DIV14.DIV5	TRUE	rnorvegicus
0.538	0.77022	-0.978681	CBX8	-1.41344	Polycomb-group repressive complex 1 (PRC1)	D10.D3	TRUE	mmusculus
0.537	0.941112	0.928928	MYBBP1A	0.05219	B-WICH	Neu.NPC	FALSE	hsapiens
0.537	0.837732	1.04962	SSRP1	-0.559657	MMS22L-TONSL	Neu.NPC	TRUE	hsapiens
0.537	0.905595	-0.444796	CTDP1	0.438612	Flag-FCP1	Neur.Stem	FALSE	drerio
0.537	1.02332	-1.51392	DEK	-2.32636	B-WICH	D10.D0	FALSE	mmusculus
0.536	0.726484	0.788429	VAMP2	1.3079	SNARE complex	D10.D3	TRUE	mmusculus
0.536	0.629651	0.841944	NCKAP1	0.391702	Wave-2 complex	D3.D0	TRUE	mmusculus
0.535	0.932579	0.92503	COPE	0.55279	COPI	NPC.iPS	FALSE	hsapiens
0.535	0.497703	-0.0760754	RUVBL1	-0.468246	SRCAP	DIV5.DIV1	TRUE	rnorvegicus
0.535	1.23701	1.34646	NAA38	0.165534	emerin C25	D10.D0	FALSE	mmusculus
0.535	0.696345	-0.0616239	SIKE1	-0.102248	emerin	D10.D3	TRUE	mmusculus
0.534	0.9346	-0.769233	HSPA1A	-0.32174	P2X7 receptor signalling complex	NPC.iPS	TRUE	hsapiens
0.534	0.506679	-0.21465	RUVBL1	-0.468246	INO80.com	DIV5.DIV1	TRUE	rnorvegicus
0.534	1.15301	2.12928	TOP1	-1.51929	RC complex during S-phase of cell cycle	D10.D0	TRUE	mmusculus
0.534	0.659225	-0.490173	CDK14	0.0478678	Pho85p/Pcl1p complex	D10.D3	TRUE	mmusculus
0.534	0.732408	-1.99068	DDX39	-0.598379	Transcription-export (TREX) complex	D3.D0	TRUE	mmusculus
0.533	1.01355	-0.45029	ATP6V1F	1.31518	H+transporting ATPase; vacuolar	DIV14.DIV1	TRUE	rnorvegicus
0.533	0.462674	0.0264508	TOP1	-0.684426	RC complex during S-phase of cell cycle	DIV5.DIV1	TRUE	rnorvegicus
0.532	1.00746	0.437747	HSPA8	0.106823	P2X7 receptor signalling complex	Neu.NPC	TRUE	hsapiens
0.532	0.911539	1.39712	CBX3A	2.13606	E2F6.com-1	Neur.Stem	TRUE	drerio
0.532	0.689286	-0.392107	EIF3A	-0.428	eIF3	DIV14.DIV5	FALSE	rnorvegicus
0.532	0.744417	1.16416	HSP90AA1	0.376848	TNF-alpha/NF-kappa B signaling complex 6	D10.D3	TRUE	mmusculus
0.531	0.809636	-0.857443	SKP1	-0.57582	PFD-like	NPC.iPS	FALSE	hsapiens
0.531	0.788846	-0.287273	SMARCB1	-0.576648	RSC	D10.D3	FALSE	mmusculus
0.531	0.713679	-1.58929	RELA	-1.21987	TNF-alpha/Nf-kappa B signaling complex (RPL6; RPL30; RPS13; CHUK; DDX3X; NFKB2; NFKBIB; REL; IKBKG; NFKB1; MAP3K8; RELB; GLG1; NFKBIA; RELA; TNIP2; GTF2I)	D10.D3	TRUE	mmusculus
0.531	0.675137	0.0535985	TLE1	-0.905836	NK-3-Groucho-HIPK2-SIN3A-RbpA48-HDAC1 complex	D10.D3	TRUE	mmusculus
0.531	0.736113	0.16102	MRPL45	-0.0962045	smc5p-Smc6p complex	D10.D3	FALSE	mmusculus
0.531	0.625036	-0.887359	ACTR1B	-0.177923	dynactin complex	D3.D0	TRUE	mmusculus
0.53	0.78479	-0.627269	RAB13	-0.162545	Sro1p/Sec4p/Sec9p complex	NPC.iPS	TRUE	hsapiens
0.53	1.01291	1.12298	MT-ATP6	2.06467	F0/F1 ATP synthase (complex V)	Neu.NPC	FALSE	hsapiens
0.53	0.565691	1.0394	SMARCA2	0.0989585	BAF complex	DIV5.DIV1	TRUE	rnorvegicus
0.53	1.2352	1.10527	HSPA8	-0.109049	HCF-1N	D10.D0	TRUE	mmusculus
0.53	0.721307	1.70833	RBBP7	-0.756247	Polycomb-group repressive complex 2 (PRC2)	D10.D3	TRUE	mmusculus
0.529	0.913966	0.609379	SEC31A	0.643543	COPII	NPC.iPS	TRUE	hsapiens
0.528	0.834739	-1.19443	SNRPD1	-1.56779	Spliceosome-Sm	Neu.NPC	TRUE	hsapiens
0.528	1.09842	-1.22215	PFN1	-0.474152	Profilin 1 complex	D10.D0	TRUE	mmusculus
0.528	1.12834	0.761098	CAPZB	0.534131	RICH1/AMOT polarity complex; Flag-Rich1 precipitated	D10.D0	FALSE	mmusculus
0.528	0.732244	1.44587	AFF4	0.270411	ELL.com	D3.D0	TRUE	mmusculus
0.528	0.725715	1.18543	RCOR3	0.167145	CtBP	D3.D0	TRUE	mmusculus
0.528	0.672018	-1.31982	SNX6	-0.676322	retromer complex	D3.D0	TRUE	mmusculus
0.527	0.835542	0.51958	IK	-0.287148	Spliceosome-B	NPC.iPS	TRUE	hsapiens
0.527	1.35311	-0.0368434	TUBB4B	1.64849	Tubulins	Neu.IPS	TRUE	hsapiens
0.527	0.59925	1.51178	FLNA	-0.158	COMPASS complex	DIV14.DIV5	TRUE	rnorvegicus
0.527	0.7056	1.33594	HIST1H4B	0.319	H2AX complex; isolated from cells without IR exposure	DIV14.DIV5	TRUE	rnorvegicus
0.527	0.5905	1.43328	KPNB1	-0.155	Nuclear cap binding complex (NCBC)	DIV14.DIV5	TRUE	rnorvegicus
0.527	1.14082	0.822064	SRC	0.66202	Polycystin-1 multiprotein complex (ACTN1; CDH1; SRC; JUP; VCL; CTNNB1; PXN; BCAR1; PKD1; PTK2; TLN1)	D10.D0	TRUE	mmusculus
0.527	0.706048	-0.826367	GRPEL1	0.195783	PAM complex	D3.D0	TRUE	mmusculus
0.526	1.0875	1.38951	AP2M1	1.22019	AP-1 adaptor complex	D10.D0	TRUE	mmusculus
0.526	1.15882	-1.8748	YPEL5	-1.14391	RANBP9-containing complex	D10.D0	TRUE	mmusculus
0.526	1.20115	0.951578	ATP6V0D1	2.60963	H+transporting ATPase; vacuolar	D10.D0	TRUE	mmusculus
0.526	0.708311	-0.187417	PPP2CB	-0.264342	protein phosphatase type 2A complex (Rts1p)	D10.D3	TRUE	mmusculus
0.526	0.664092	1.15792	RBBP4	-0.0862797	NK-3-Groucho-HIPK2-SIN3A-RbpA48-HDAC1 complex	D3.D0	TRUE	mmusculus
0.525	1.39717	1.51695	YWHAE	0.659627	emerin C25	Neu.IPS	TRUE	hsapiens
0.525	1.26833	-0.322951	LIG1	-1.70686	RC complex during S-phase of cell cycle	Neu.IPS	TRUE	hsapiens
0.525	1.09761	-0.259793	MCM2	-2.55232	MMS22L-TONSL	Neu.IPS	TRUE	hsapiens
0.525	1.35311	0.0260579	TUBA1B	1.74562	Tubulins	Neu.IPS	TRUE	hsapiens
0.525	0.822845	-0.302512	RUVBL2	-1.09829	SRCAP	DIV14.DIV1	TRUE	rnorvegicus
0.525	0.6108	-0.525315	HDAC1	-0.41	HDAC1-PP1	DIV14.DIV5	TRUE	rnorvegicus
0.525	0.672306	-1.37259	ARHGAP17	-0.50253	RICH1/AMOT polarity complex; Flag-Rich1 precipitated	D10.D3	TRUE	mmusculus
0.525	0.754506	1.37213	RPL8	0.00196085	Yph1-L	D10.D3	TRUE	mmusculus
0.524	0.846496	-0.144436	EHMT2	1.38355	CtBP	Neur.Stem	TRUE	drerio
0.524	0.837757	-0.254827	EEF1B2	0.0914693	eEF1	DIV14.DIV1	TRUE	rnorvegicus
0.524	0.726601	-1.79866	PFDN2	-0.125855	Kinase maturation complex 1	D10.D3	FALSE	mmusculus
0.524	0.76017	-1.19669	GNB4	-0.235667	heterotrimeric G-protein complex	D10.D3	TRUE	mmusculus
0.523	1.00741	-0.267824	MRE11A	-0.99801	CF IIAm complex (Cleavage factor IIAm complex)	Neu.NPC	FALSE	hsapiens
0.523	0.999205	-0.873835	EIF3JB	0.149389	eIF3	Neur.Stem	TRUE	drerio
0.522	1.30364	0.85622	ASF1A	-0.249655	H3.3 com	Neu.IPS	TRUE	hsapiens
0.522	0.976628	0.344283	HNRNPR	1.47607	H2AX complex; isolated from cells without IR exposure	Neur.Stem	TRUE	drerio
0.522	0.862176	-0.210132	CTBP2A	1.32083	CtBP	Neur.Stem	TRUE	drerio
0.522	0.686875	-0.0930618	PCGF6	-0.982399	E2F6.com-1	D10.D3	TRUE	mmusculus
0.521	0.882001	0.0350889	CHD4	0.0833433	NuRD complex	NPC.iPS	TRUE	hsapiens
0.521	0.823903	0.71394	SNRPD3	0.232193	telomerase	NPC.iPS	TRUE	hsapiens
0.521	1.13831	-0.304446	GNB2	1.09139	heterotrimeric G-protein complex	Neu.IPS	TRUE	hsapiens
0.521	1.12887	-1.46662	HSPB1	-1.60169	Spliceosome-B	Neu.IPS	TRUE	hsapiens
0.521	1.23126	2.79778	MED26	-0.0610081	Mediator	D10.D0	FALSE	mmusculus
0.521	0.628354	0.0644961	ISY1	-0.36431	ISW1b complex	D3.D0	FALSE	mmusculus
0.52	0.75558	-0.704714	WDR77	-0.361593	Flag-FCP1	NPC.iPS	TRUE	hsapiens
0.52	1.04298	0.289703	YWHAE1	1.30048	Kinase maturation complex 1	Neur.Stem	TRUE	drerio
0.52	0.844745	-0.130928	RUVBL1	-0.903418	SRCAP	DIV14.DIV1	TRUE	rnorvegicus
0.52	0.809435	-0.255286	DMAP1	-1.04466	SRCAP	DIV14.DIV1	FALSE	rnorvegicus
0.52	0.919224	-1.74836	SNX6	-0.250883	retromer complex	DIV14.DIV1	TRUE	rnorvegicus
0.52	0.7145	-1.35279	SUPT16H	-0.972	H2AX complex; isolated from cells without IR exposure	DIV14.DIV5	FALSE	rnorvegicus
0.52	0.473873	-0.0475172	TUBA1B	-0.0791472	ASCOM complex	DIV5.DIV1	TRUE	rnorvegicus
0.52	1.12515	0.527472	ACTB	0.719985	emerin	D10.D0	TRUE	mmusculus
0.52	0.699995	0.70246	PPP2R1A	0.373238	protein phosphatase type 2A complex (Rts1p)	D10.D3	TRUE	mmusculus
0.52	0.747662	2.2216	MED26	0.192979	Mediator	D3.D0	FALSE	mmusculus
0.519	0.840104	0.54371	PRPF38A	-0.256773	Spliceosome-B	NPC.iPS	FALSE	hsapiens
0.519	0.768171	0.0324445	SRP72	0.132013	Signal recognition particle (SRP) complex	NPC.iPS	FALSE	hsapiens
0.519	0.9299	-0.290788	ACTL6A	-0.41601	INO80.com	Neu.NPC	TRUE	hsapiens
0.519	1.01246	-0.677427	IPO4	-1.51062	H3.3 com	Neu.NPC	TRUE	hsapiens
0.519	1.17316	-1.18221	FAM32A	-2.37423	Spliceosome-C	D10.D0	FALSE	mmusculus
0.519	0.713092	-1.57669	CNOT2	-0.914425	CCR4-NOT complex	D10.D3	TRUE	mmusculus
0.518	0.836621	-0.792062	MCM2	-1.45423	emerin C24	NPC.iPS	TRUE	hsapiens
0.518	0.477258	-0.52415	HSP90AB1	-0.0940677	P2X7 receptor signalling complex	DIV5.DIV1	TRUE	rnorvegicus
0.518	0.73866	1.15315	CDC37	0.370452	TNF-alpha/NF-kappa B signaling complex 6	D10.D3	TRUE	mmusculus
0.517	1.07248	0.587639	ARF4	0.99252	Chs5p/Arf-1binding proteins (ChAPs)	Neu.IPS	TRUE	hsapiens
0.517	1.19262	-0.237999	XRCC5	-0.66821	Rap1 complex	Neu.IPS	TRUE	hsapiens
0.517	0.8586	-0.936919	HSP90AB1	-0.126238	P2X7 receptor signalling complex	DIV14.DIV1	TRUE	rnorvegicus
0.517	0.929683	-1.02331	LSM8	-1.19698	emerin C25	DIV14.DIV1	TRUE	rnorvegicus
0.517	0.735142	-0.952115	INO80	-1.10435	INO80.com	D10.D3	TRUE	mmusculus
0.516	0.98209	-1.23655	COPS7B	-0.65529	COP9 signalosome	Neu.NPC	TRUE	hsapiens
0.515	0.916266	0.710479	SNRPD3	0.232193	Survival of motor neuron (SMN) complex	NPC.iPS	TRUE	hsapiens
0.515	1.23206	-0.623704	VPS26A	0.34782	retromer complex	Neu.IPS	TRUE	hsapiens
0.514	0.766742	0.592579	TAF5	1.49354	TAF complex	Neur.Stem	TRUE	drerio
0.514	0.982932	0.463361	ATP6V1D	2.33668	H+transporting ATPase; vacuolar	DIV14.DIV1	FALSE	rnorvegicus
0.514	0.490395	0.0743387	BCAR1	-0.169656	Polycystin-1 multiprotein complex (ACTN1; CDH1; SRC; JUP; VCL; CTNNB1; PXN; BCAR1; PKD1; PTK2; TLN1)	DIV5.DIV1	TRUE	rnorvegicus
0.513	0.755193	-0.761346	CUL1	-0.503228	PFD-like	NPC.iPS	TRUE	hsapiens
0.513	1.16824	-0.0756488	GNAI3	1.46651	heterotrimeric G-protein complex	Neu.IPS	TRUE	hsapiens
0.513	1.203	-0.578989	SNX1	0.40593	retromer complex	Neu.IPS	TRUE	hsapiens
0.513	0.868968	-0.695105	DDX21	-1.18598	B-WICH	Neu.NPC	TRUE	hsapiens
0.513	0.842168	-0.489176	PRMT5	-0.062825	FIB-associated protein complex	Neu.NPC	FALSE	hsapiens
0.513	0.837287	-0.421058	RUVBL2	-1.09829	INO80.com	DIV14.DIV1	TRUE	rnorvegicus
0.513	0.58025	0.783396	CSNK2A1	0.232	UTP C complex	DIV14.DIV5	TRUE	rnorvegicus
0.513	1.05688	1.16055	ARXES2	0.911542	signal peptidase complex	D10.D0	TRUE	mmusculus
0.513	1.17838	-0.895815	GNB1	0.732197	heterotrimeric G-protein complex	D10.D0	TRUE	mmusculus
0.513	0.704481	1.08973	WDR5	-0.431557	KMT2C/D containing complex	D10.D3	TRUE	mmusculus
0.513	0.682941	-0.937078	HSPA8	-0.507621	P2X7 receptor signalling complex	D3.D0	TRUE	mmusculus
0.513	0.645428	1.16589	RELA	0.390696	TNF-alpha/NF-kappa B signaling complex (CHUK; BTRC; NFKB2; PPP6C; REL; CUL1; IKBKE; SAPS2; SAPS1; ANKRD28; RELA; SKP1)	D3.D0	TRUE	mmusculus
0.512	0.937202	-1.69872	BUB3	-0.840277	Spliceosome-A	NPC.iPS	TRUE	hsapiens
0.512	0.86481	0.757525	NCBP2	1.96359	CRM1-RAN-PHAX-CBC complex (cap binding complex)	Neur.Stem	FALSE	drerio
0.512	0.924601	0.680009	YWHAE	0.129423	emerin C25	DIV14.DIV1	TRUE	rnorvegicus
0.512	1.20238	1.05974	HSP90AA1	-0.152806	HCF-1N	D10.D0	TRUE	mmusculus
0.512	1.18318	0.965825	CBX6	-0.001569	Polycomb-group repressive complex 1 (PRC1)	D10.D0	TRUE	mmusculus
0.511	1.01134	1.63836	TCERG1A	2.76859	Spliceosome-A	Neur.Stem	TRUE	drerio
0.511	0.869791	-1.22392	CWC15	-1.78302	Spliceosome-Prp19	DIV14.DIV1	TRUE	rnorvegicus
0.511	0.517701	0.784656	YWHAE	0.102482	emerin C25	DIV5.DIV1	TRUE	rnorvegicus
0.51	1.13831	-0.121279	GNB1	1.3917	heterotrimeric G-protein complex	Neu.IPS	TRUE	hsapiens
0.51	0.816647	-0.324598	EEF1G	0.00702956	eEF1	DIV14.DIV1	TRUE	rnorvegicus
0.51	0.640968	0.939218	ACTG1	0.492521	P2X7 receptor signalling complex	D3.D0	TRUE	mmusculus
0.51	0.734578	-0.516452	EIF3J2	-0.614028	eIF3	D3.D0	TRUE	mmusculus
0.51	0.664952	1.06634	POLR2B	0.0102812	Flag-FCP1	D3.D0	TRUE	mmusculus
0.51	0.650291	0.261987	DYNC1I1	0.613682	cytoplasmic dynein complex	D3.D0	TRUE	mmusculus
0.509	1.00537	0.675715	SMARCC2	0.07481	BAF complex	Neu.NPC	TRUE	hsapiens
0.509	1.01494	1.81768	DAZAP1	0.74604	mRNA cleavage factor complex (CFI)	Neu.NPC	TRUE	hsapiens
0.509	0.728286	-1.59193	EEF1A1	-0.418	mitochondrial ribosomal large subunit	DIV14.DIV5	TRUE	rnorvegicus
0.509	0.6108	0.232065	PPP1CA	0.048	HDAC1-PP1	DIV14.DIV5	TRUE	rnorvegicus
0.508	0.948272	0.575471	HDGF	0.845107	emerin C52	NPC.iPS	TRUE	hsapiens
0.508	0.927986	-0.692713	TUBA1B	0.321713	Tubulins	NPC.iPS	TRUE	hsapiens
0.508	1.15975	0.578205	ACTB	0.291947	emerin	Neu.IPS	TRUE	hsapiens
0.508	0.974727	0.847472	YWHAH	1.18951	Kinase maturation complex 1	Neu.NPC	TRUE	hsapiens
0.508	1.05257	-1.34488	AP1G1	-0.563203	AP-1 adaptor complex	D10.D0	TRUE	mmusculus
0.508	0.605567	0.611323	RBX1	0.0676667	p27-cyclinE-Cdk2 - Ubiquitin E3 ligase (SKP1A; SKP2; CUL1; CKS1B; RBX1) complex	D10.D3	TRUE	mmusculus
[truncated: 7,619 more rows]
